# Supplementary material for: Heterochronic transcription factor expression drives cone-dominant retina development in 13-lined ground squirrels
Source: bioRxiv preprint, doi:10.1101/2025.04.25.650540, version 6 (2026-01-13)
Supplement: Supplemental Table 3 [file 650540_file18.xlsx]

## Sheet: Sheet 1
13-LGS_Genes
