# Supplementary material for: Heterochronic transcription factor expression drives cone-dominant retina development in 13-lined ground squirrels
Source: bioRxiv preprint, doi:10.1101/2025.04.25.650540, version 6 (2026-01-13)
Supplement: Supplemental Table 4 [file 650540_file19.xlsx]

## Sheet: Contents
Gene	Differential genes between 13LGS and Mouse
Motif	Differential motifs between 13LGS and Mouse
13LGS_Motif	Cell type specific motifs in 13LGS (Late stage)
Mouse_Motif	Cell type specific motifs in Mouse (Late stage)

## Sheet: Gene
Gene	class	cluster	p_val	avg_log2FC	pct.1	pct.2	p_val_adj
AAMP-containing	LGS:RPC vs Mouse:RPC	5	0	-1.43993	0	0.291	0
ACTL6A-like	LGS:RPC vs Mouse:RPC	5	0	-2.10753	0.003	0.485	0
ACTR3-like	LGS:RPC vs Mouse:RPC	5	0	-1.27503	0	0.248	0
ADAMTS6	LGS:RPC vs Mouse:RPC	1	0	0.876382	0.128	0	0
AHI1-like	LGS:RPC vs Mouse:RPC	5	0	-1.40896	0	0.275	0
ALDOA	LGS:RPC vs Mouse:RPC	5	0	-3.21338	0	0.715	0
ANAPC13	LGS:RPC vs Mouse:RPC	5	0	-2.18299	0.001	0.488	0
ANK3	LGS:RPC vs Mouse:RPC	5	0	-1.25611	0.003	0.246	0
ANKRD11-containing	LGS:RPC vs Mouse:RPC	5	0	-1.48078	0	0.29	0
ANP32B-like	LGS:RPC vs Mouse:RPC	5	0	-2.90461	0.003	0.675	0
AP1S2	LGS:RPC vs Mouse:RPC	2	0	1.10071	0.263	0.036	0
API5	LGS:RPC vs Mouse:RPC	5	0	-1.08696	0	0.205	0
ARL1	LGS:RPC vs Mouse:RPC	5	0	-1.12035	0.001	0.218	0
ARPC3	LGS:RPC vs Mouse:RPC	5	0	-1.68146	0.005	0.365	0
ARPP19-like	LGS:RPC vs Mouse:RPC	5	0	-2.08932	0	0.47	0
ATF4	LGS:RPC vs Mouse:RPC	5	0	-1.26825	0	0.244	0
ATP6V1G1	LGS:RPC vs Mouse:RPC	5	0	-2.03203	0	0.458	0
AUTS2-like	LGS:RPC vs Mouse:RPC	5	0	-1.10379	0.001	0.208	0
AZIN1-containing	LGS:RPC vs Mouse:RPC	5	0	-1.08434	0.001	0.208	0
Aarsd1	LGS:RPC vs Mouse:RPC	2	0	0.96972	0.195	0.014	0
Acin1	LGS:RPC vs Mouse:RPC	5	0	-1.30979	0.078	0.382	0
Adarb1	LGS:RPC vs Mouse:RPC	2	0	1.23631	0.244	0.011	0
Adgra2	LGS:RPC vs Mouse:RPC	1	0	0.990841	0.191	0.01	0
Adgrg6	LGS:RPC vs Mouse:RPC	1	0	0.842247	0.142	0.001	0
Adnp	LGS:RPC vs Mouse:RPC	2	0	0.967073	0.193	0.005	0
Aldoc	LGS:RPC vs Mouse:RPC	2	0	2.6065	0.439	0.007	0
Anapc16	LGS:RPC vs Mouse:RPC	2	0	1.17191	0.521	0.219	0
Ankrd12	LGS:RPC vs Mouse:RPC	3	0	1.52059	0.377	0.052	0
Ankrd28	LGS:RPC vs Mouse:RPC	2	0	0.918173	0.188	0.01	0
Anp32a	LGS:RPC vs Mouse:RPC	6	0	-0.981177	0.41	0.688	0
Anp32e	LGS:RPC vs Mouse:RPC	5	0	-1.44988	0.317	0.688	0
Aph1a	LGS:RPC vs Mouse:RPC	2	0	0.944723	0.182	0.011	0
Apoe	LGS:RPC vs Mouse:RPC	5	0	-1.8731	0	0.323	0
Arf4	LGS:RPC vs Mouse:RPC	6	0	-1.30095	0.294	0.65	0
Armcx3	LGS:RPC vs Mouse:RPC	2	0	1.50376	0.357	0.047	0
Ascl1	LGS:RPC vs Mouse:RPC	6	0	-1.66287	0.077	0.432	0
Atp5b	LGS:RPC vs Mouse:RPC	5	0	-0.759067	0.671	0.87	0
Atp5c1	LGS:RPC vs Mouse:RPC	5	0	-1.85416	0.153	0.644	0
Atp5e	LGS:RPC vs Mouse:RPC	2	0	1.78537	0.954	0.684	0
Atp5g2	LGS:RPC vs Mouse:RPC	2	0	4.01851	0.895	0.015	0
Atp5g3	LGS:RPC vs Mouse:RPC	2	0	1.60548	0.825	0.456	0
Atp5h	LGS:RPC vs Mouse:RPC	5	0	-0.816474	0.577	0.807	0
Atp5l	LGS:RPC vs Mouse:RPC	2	0	3.13067	0.769	0.037	0
Atxn7l3b	LGS:RPC vs Mouse:RPC	5	0	-1.59756	0.286	0.719	0
B4galt2	LGS:RPC vs Mouse:RPC	2	0	0.979427	0.22	0.027	0
BANF1	LGS:RPC vs Mouse:RPC	5	0	-2.17818	0	0.491	0
BEX2	LGS:RPC vs Mouse:RPC	2	0	1.34837	0.765	0.445	0
BTG1	LGS:RPC vs Mouse:RPC	5	0	-1.43981	0.014	0.292	0
BZW1-like	LGS:RPC vs Mouse:RPC	5	0	-2.22866	0.007	0.515	0
Basp1	LGS:RPC vs Mouse:RPC	5	0	-1.82634	0.012	0.391	0
Bbip1	LGS:RPC vs Mouse:RPC	5	0	-1.48908	0.023	0.342	0
Bccip	LGS:RPC vs Mouse:RPC	6	0	-1.47199	0.081	0.428	0
Bloc1s1	LGS:RPC vs Mouse:RPC	2	0	1.46619	0.462	0.108	0
Bmp7	LGS:RPC vs Mouse:RPC	1	0	1.15377	0.244	0.014	0
Bnip3	LGS:RPC vs Mouse:RPC	1	0	1.88374	0.7	0.258	0
Borcs5	LGS:RPC vs Mouse:RPC	2	0	1.18991	0.297	0.052	0
Bri3	LGS:RPC vs Mouse:RPC	2	0	1.82583	0.583	0.123	0
Btf3	LGS:RPC vs Mouse:RPC	2	0	1.95943	0.867	0.404	0
Btg2	LGS:RPC vs Mouse:RPC	4	0	1.4999	0.67	0.308	0
Btg3	LGS:RPC vs Mouse:RPC	1	0	1.1807	0.248	0.004	0
CACYBP-like	LGS:RPC vs Mouse:RPC	5	0	-1.95443	0	0.429	0
CALM1-containing	LGS:RPC vs Mouse:RPC	5	0	-4.03369	0	0.904	0
CALM2-like	LGS:RPC vs Mouse:RPC	5	0	-4.43654	0	0.908	0
CBX1	LGS:RPC vs Mouse:RPC	5	0	-2.98038	0.006	0.725	0
CCDC115-like	LGS:RPC vs Mouse:RPC	5	0	-1.32437	0	0.261	0
CCND1	LGS:RPC vs Mouse:RPC	6	0	-4.17016	0.295	0.987	0
CCNI-like	LGS:RPC vs Mouse:RPC	5	0	-1.20364	0.01	0.257	0
CDC42-like	LGS:RPC vs Mouse:RPC	5	0	-2.62391	0	0.625	0
CDK4-containing	LGS:RPC vs Mouse:RPC	5	0	-3.23658	0.001	0.775	0
CFL2	LGS:RPC vs Mouse:RPC	5	0	-2.17904	0	0.495	0
CHMP5-like	LGS:RPC vs Mouse:RPC	5	0	-1.62382	0	0.342	0
CLNS1A-like	LGS:RPC vs Mouse:RPC	5	0	-1.41348	0	0.287	0
CNIH1	LGS:RPC vs Mouse:RPC	5	0	-1.58954	0.006	0.343	0
COMMD2-like	LGS:RPC vs Mouse:RPC	5	0	-1.10945	0	0.213	0
COPZ1	LGS:RPC vs Mouse:RPC	5	0	-1.48371	0.001	0.31	0
COX14-like	LGS:RPC vs Mouse:RPC	5	0	-1.72283	0.003	0.37	0
COX4I1-like	LGS:RPC vs Mouse:RPC	5	0	-0.730177	0.795	0.938	0
COX6A1	LGS:RPC vs Mouse:RPC	3	0	0.896662	0.826	0.656	0
COX6B1-like	LGS:RPC vs Mouse:RPC	5	0	-2.96029	0.021	0.748	0
Calm3	LGS:RPC vs Mouse:RPC	1	0	0.912426	0.806	0.657	0
Camk2n1	LGS:RPC vs Mouse:RPC	2	0	2.10113	0.629	0.136	0
Carhsp1	LGS:RPC vs Mouse:RPC	1	0	1.26142	0.621	0.299	0
Cav1	LGS:RPC vs Mouse:RPC	1	0	0.930885	0.163	0.002	0
Cav2	LGS:RPC vs Mouse:RPC	1	0	1.25245	0.248	0.005	0
Cbx3	LGS:RPC vs Mouse:RPC	2	0	2.27006	0.803	0.252	0
Cbx5	LGS:RPC vs Mouse:RPC	8	0	0.971942	0.593	0.401	0
Ccdc184	LGS:RPC vs Mouse:RPC	1	0	1.11349	0.2	0.001	0
Ccdc34	LGS:RPC vs Mouse:RPC	6	0	-1.38469	0.305	0.656	0
Ccdc50	LGS:RPC vs Mouse:RPC	1	0	1.52116	0.482	0.117	0
Ccdc62	LGS:RPC vs Mouse:RPC	1	0	0.871648	0.177	0.008	0
Ccdc85c	LGS:RPC vs Mouse:RPC	2	0	0.77057	0.138	0.001	0
Cd63	LGS:RPC vs Mouse:RPC	1	0	1.18528	0.696	0.402	0
Cdca8	LGS:RPC vs Mouse:RPC	8	0	-1.74073	0.14	0.474	0
Cdh2	LGS:RPC vs Mouse:RPC	1	0	1.31074	0.672	0.354	0
Cdh7	LGS:RPC vs Mouse:RPC	1	0	1.35766	0.237	0.005	0
Cenpm	LGS:RPC vs Mouse:RPC	6	0	-1.54877	0.045	0.374	0
Cenpv	LGS:RPC vs Mouse:RPC	1	0	2.62157	0.773	0.169	0
Cfl1	LGS:RPC vs Mouse:RPC	5	0	-2.91693	0.173	0.884	0
Chchd2	LGS:RPC vs Mouse:RPC	5	0	-1.97678	0.329	0.845	0
Chd9	LGS:RPC vs Mouse:RPC	2	0	1.68933	0.58	0.156	0
Cir1	LGS:RPC vs Mouse:RPC	2	0	1.18582	0.268	0.041	0
Cirbp	LGS:RPC vs Mouse:RPC	3	0	1.00223	0.871	0.638	0
Ckb	LGS:RPC vs Mouse:RPC	1	0	0.933289	0.999	0.994	0
Cldnd1	LGS:RPC vs Mouse:RPC	5	0	-1.16128	0.002	0.223	0
Clic1	LGS:RPC vs Mouse:RPC	6	0	-1.11208	0.317	0.633	0
Clu	LGS:RPC vs Mouse:RPC	2	0	4.54066	0.913	0.004	0
Col9a1	LGS:RPC vs Mouse:RPC	6	0	-2.36436	0.032	0.517	0
Cort	LGS:RPC vs Mouse:RPC	1	0	1.16834	0.245	0.008	0
Cotl1	LGS:RPC vs Mouse:RPC	5	0	-1.51128	0.011	0.32	0
Cp	LGS:RPC vs Mouse:RPC	6	0	-1.79597	0.025	0.411	0
Cplx4	LGS:RPC vs Mouse:RPC	2	0	2.36095	0.501	0.004	0
Crabp1	LGS:RPC vs Mouse:RPC	1	0	5.13525	0.983	0.051	0
Crebzf	LGS:RPC vs Mouse:RPC	2	0	1.58477	0.383	0.039	0
Cript	LGS:RPC vs Mouse:RPC	5	0	-1.37131	0.064	0.383	0
Crybb3	LGS:RPC vs Mouse:RPC	1	0	1.40382	0.256	0.003	0
Crym	LGS:RPC vs Mouse:RPC	6	0	-2.24966	0.084	0.606	0
Cstb	LGS:RPC vs Mouse:RPC	2	0	1.4959	0.57	0.191	0
Ctsl	LGS:RPC vs Mouse:RPC	5	0	-1.43772	0	0.28	0
Cwf19l2	LGS:RPC vs Mouse:RPC	2	0	1.22766	0.309	0.072	0
Cxcr4	LGS:RPC vs Mouse:RPC	1	0	1.70903	0.524	0.131	0
DDX3X	LGS:RPC vs Mouse:RPC	5	0	-1.48764	0	0.296	0
DDX46-like	LGS:RPC vs Mouse:RPC	5	0	-1.39137	0.047	0.349	0
DHX15-containing	LGS:RPC vs Mouse:RPC	5	0	-1.19652	0	0.23	0
DPY30	LGS:RPC vs Mouse:RPC	5	0	-1.98202	0.001	0.445	0
DUT	LGS:RPC vs Mouse:RPC	5	0	-2.8882	0.006	0.659	0
DYNLL1-like	LGS:RPC vs Mouse:RPC	5	0	-3.29369	0	0.671	0
DYNLRB1	LGS:RPC vs Mouse:RPC	5	0	-2.23982	0.001	0.517	0
Dazap1	LGS:RPC vs Mouse:RPC	5	0	-1.65327	0.022	0.387	0
Ddah2	LGS:RPC vs Mouse:RPC	6	0	-1.00114	0.396	0.692	0
Ddx17	LGS:RPC vs Mouse:RPC	2	0	1.25703	0.466	0.164	0
Ddx23	LGS:RPC vs Mouse:RPC	2	0	1.1863	0.321	0.058	0
Ddx5	LGS:RPC vs Mouse:RPC	2	0	0.769061	0.935	0.85	0
Dnaja1	LGS:RPC vs Mouse:RPC	1	0	1.12811	0.649	0.37	0
Dpy19l1	LGS:RPC vs Mouse:RPC	1	0	1.76617	0.452	0.054	0
Dpysl5	LGS:RPC vs Mouse:RPC	2	0	0.952343	0.205	0.021	0
Drap1	LGS:RPC vs Mouse:RPC	2	0	1.10939	0.526	0.245	0
Dtymk	LGS:RPC vs Mouse:RPC	5	0	-1.98301	0.007	0.442	0
Dync1i2	LGS:RPC vs Mouse:RPC	2	0	1.21841	0.558	0.285	0
EEF1A1	LGS:RPC vs Mouse:RPC	5	0	-5.2186	0.004	0.983	0
EEF1G	LGS:RPC vs Mouse:RPC	5	0	-3.2448	0.006	0.761	0
EIF1-containing	LGS:RPC vs Mouse:RPC	5	0	-3.99417	0.001	0.893	0
EIF4A2-containing	LGS:RPC vs Mouse:RPC	5	0	-1.53562	0	0.309	0
Eef1b2	LGS:RPC vs Mouse:RPC	1	0	1.05833	0.854	0.649	0
Eef1d	LGS:RPC vs Mouse:RPC	1	0	0.867197	0.737	0.53	0
Egln1	LGS:RPC vs Mouse:RPC	1	0	1.38399	0.358	0.052	0
Eid1	LGS:RPC vs Mouse:RPC	2	0	2.11248	0.788	0.267	0
Eid2	LGS:RPC vs Mouse:RPC	2	0	1.00403	0.241	0.036	0
Eif3i	LGS:RPC vs Mouse:RPC	1	0	0.901599	0.733	0.519	0
Eif4g2	LGS:RPC vs Mouse:RPC	5	0	-1.48793	0.275	0.683	0
Eif5a	LGS:RPC vs Mouse:RPC	6	0	-1.17342	0.42	0.746	0
Emg1	LGS:RPC vs Mouse:RPC	6	0	-1.52464	0.149	0.544	0
Eno2	LGS:RPC vs Mouse:RPC	2	0	1.31313	0.269	0.011	0
Ensa	LGS:RPC vs Mouse:RPC	1	0	1.33255	0.504	0.17	0
Epha5	LGS:RPC vs Mouse:RPC	5	0	-1.38865	0.189	0.533	0
Epm2aip1	LGS:RPC vs Mouse:RPC	2	0	1.8431	0.513	0.077	0
Eps8	LGS:RPC vs Mouse:RPC	2	0	1.25624	0.237	0.003	0
Erh	LGS:RPC vs Mouse:RPC	1	0	1.94913	0.683	0.197	0
Espn	LGS:RPC vs Mouse:RPC	6	0	-3.13907	0.013	0.76	0
FABP5	LGS:RPC vs Mouse:RPC	5	0	-1.47714	0.001	0.284	0
FAM174B-containing	LGS:RPC vs Mouse:RPC	1	0	1.46306	0.288	0.011	0
FAM19A1-containing	LGS:RPC vs Mouse:RPC	6	0	-1.49057	0.001	0.292	0
FAM49B	LGS:RPC vs Mouse:RPC	5	0	-1.42323	0	0.289	0
FAM89B-like	LGS:RPC vs Mouse:RPC	2	0	1.32482	0.271	0.008	0
FKBP1A	LGS:RPC vs Mouse:RPC	5	0	-2.43405	0.011	0.593	0
FRMD4A	LGS:RPC vs Mouse:RPC	6	0	-1.62193	0	0.326	0
FTH1	LGS:RPC vs Mouse:RPC	5	0	-4.00346	0	0.908	0
FUS-like	LGS:RPC vs Mouse:RPC	5	0	-2.02031	0.154	0.665	0
Fabp3	LGS:RPC vs Mouse:RPC	1	0	0.837785	0.152	0.003	0
Fam184a	LGS:RPC vs Mouse:RPC	1	0	1.37736	0.335	0.056	0
Fau	LGS:RPC vs Mouse:RPC	1	0	0.834583	0.99	0.95	0
Fkbp3	LGS:RPC vs Mouse:RPC	6	0	-1.29232	0.381	0.744	0
Fnbp1l	LGS:RPC vs Mouse:RPC	1	0	1.22546	0.385	0.11	0
Fos	LGS:RPC vs Mouse:RPC	6	0	-1.94718	0.468	0.787	0
Fundc2	LGS:RPC vs Mouse:RPC	5	0	-1.35664	0.063	0.365	0
Fxyd6	LGS:RPC vs Mouse:RPC	1	0	1.5805	0.75	0.323	0
GAPDH-like	LGS:RPC vs Mouse:RPC	5	0	-3.12889	0.001	0.626	0
GAS1-like	LGS:RPC vs Mouse:RPC	6	0	-1.48823	0.193	0.541	0
GDI2-like	LGS:RPC vs Mouse:RPC	5	0	-2.91211	0	0.69	0
GNAS	LGS:RPC vs Mouse:RPC	1	0	0.685175	0.93	0.863	0
GRPEL1	LGS:RPC vs Mouse:RPC	5	0	-1.24692	0	0.244	0
GTPBP4	LGS:RPC vs Mouse:RPC	5	0	-1.39355	0.001	0.278	0
Gabarap	LGS:RPC vs Mouse:RPC	2	0	1.59807	0.83	0.453	0
Gabarapl2	LGS:RPC vs Mouse:RPC	2	0	1.45114	0.557	0.184	0
Gca	LGS:RPC vs Mouse:RPC	1	0	1.33572	0.319	0.032	0
Glul	LGS:RPC vs Mouse:RPC	6	0	-2.68184	0.041	0.7	0
Gnai2	LGS:RPC vs Mouse:RPC	6	0	-1.23058	0.479	0.802	0
Gng5	LGS:RPC vs Mouse:RPC	1	0	2.06487	0.776	0.28	0
Gnpda1	LGS:RPC vs Mouse:RPC	1	0	0.973987	0.175	0.001	0
Gpm6a	LGS:RPC vs Mouse:RPC	2	0	1.07627	0.752	0.542	0
Gprc5b	LGS:RPC vs Mouse:RPC	1	0	1.44419	0.339	0.039	0
Gps1	LGS:RPC vs Mouse:RPC	1	0	1.08414	0.239	0.027	0
Grid2	LGS:RPC vs Mouse:RPC	1	0	2.40117	0.578	0.052	0
Grk4	LGS:RPC vs Mouse:RPC	2	0	0.766956	0.147	0.006	0
Gstp1	LGS:RPC vs Mouse:RPC	2	0	4.62047	0.946	0.031	0
H1F0	LGS:RPC vs Mouse:RPC	5	0	-3.56741	0.032	0.776	0
H2AFJ	LGS:RPC vs Mouse:RPC	5	0	-1.62106	0.001	0.337	0
H2AFV	LGS:RPC vs Mouse:RPC	6	0	-0.768043	0.778	0.937	0
H2AFZ-like	LGS:RPC vs Mouse:RPC	1	0	1.53808	0.944	0.785	0
HDAC1	LGS:RPC vs Mouse:RPC	5	0	-1.11908	0	0.215	0
HIBADH-like	LGS:RPC vs Mouse:RPC	5	0	-1.114	0.001	0.211	0
HMGB1-like	LGS:RPC vs Mouse:RPC	5	0	-3.96775	0	0.863	0
HMGB3	LGS:RPC vs Mouse:RPC	5	0	-3.31909	0	0.755	0
HNRNPA2B1-containing	LGS:RPC vs Mouse:RPC	5	0	-4.10109	0.005	0.907	0
HNRNPA3	LGS:RPC vs Mouse:RPC	5	0	-1.76581	0.006	0.378	0
HNRNPC	LGS:RPC vs Mouse:RPC	5	0	-2.12631	0.088	0.621	0
HNRNPDL	LGS:RPC vs Mouse:RPC	5	0	-3.22727	0.003	0.762	0
HNRNPLL-containing	LGS:RPC vs Mouse:RPC	5	0	-1.48799	0.003	0.305	0
HRK-containing	LGS:RPC vs Mouse:RPC	1	0	0.905622	0.142	0.001	0
HSP90AA1-like	LGS:RPC vs Mouse:RPC	5	0	-4.06011	0.004	0.901	0
HSP90AB1	LGS:RPC vs Mouse:RPC	5	0	-4.49359	0.025	0.961	0
HSPE1-like	LGS:RPC vs Mouse:RPC	5	0	-2.30711	0.001	0.526	0
Has3	LGS:RPC vs Mouse:RPC	2	0	0.965203	0.156	0	0
Hes6	LGS:RPC vs Mouse:RPC	4	0	1.56787	0.903	0.705	0
Hltf	LGS:RPC vs Mouse:RPC	2	0	1.32171	0.323	0.04	0
Hmga1	LGS:RPC vs Mouse:RPC	1	0	1.56708	0.401	0.063	0
Hnrnpa0	LGS:RPC vs Mouse:RPC	1	0	2.17916	0.705	0.185	0
Hnrnpd	LGS:RPC vs Mouse:RPC	1	0	1.01564	0.712	0.468	0
Hnrnpk	LGS:RPC vs Mouse:RPC	6	0	-0.774531	0.815	0.955	0
Hopx	LGS:RPC vs Mouse:RPC	6	0	-1.30162	0.005	0.251	0
Hsbp1	LGS:RPC vs Mouse:RPC	1	0	0.837337	0.731	0.54	0
Hsd17b12	LGS:RPC vs Mouse:RPC	6	0	-1.37273	0.076	0.399	0
ILF2-like	LGS:RPC vs Mouse:RPC	5	0	-2.35688	0	0.543	0
IRF2BPL-like	LGS:RPC vs Mouse:RPC	5	0	-1.23564	0.003	0.237	0
ITM2B	LGS:RPC vs Mouse:RPC	5	0	-2.42337	0.001	0.558	0
Ice1	LGS:RPC vs Mouse:RPC	2	0	1.34336	0.333	0.048	0
Id3	LGS:RPC vs Mouse:RPC	6	0	-2.144	0.327	0.772	0
Ier2	LGS:RPC vs Mouse:RPC	6	0	-1.62257	0.488	0.774	0
Igfbp2	LGS:RPC vs Mouse:RPC	1	0	1.53922	0.563	0.243	0
Isca1	LGS:RPC vs Mouse:RPC	2	0	1.02775	0.272	0.049	0
Itgae	LGS:RPC vs Mouse:RPC	2	0	0.654236	0.133	0.003	0
Itm2a	LGS:RPC vs Mouse:RPC	6	0	-2.07075	0.006	0.393	0
Itm2c	LGS:RPC vs Mouse:RPC	1	0	1.18778	0.346	0.083	0
JUND-containing	LGS:RPC vs Mouse:RPC	5	0	-2.68323	0.001	0.568	0
Junb	LGS:RPC vs Mouse:RPC	5	0	-1.77975	0.083	0.419	0
KTN1-containing	LGS:RPC vs Mouse:RPC	5	0	-1.55074	0.003	0.317	0
Kbtbd11	LGS:RPC vs Mouse:RPC	6	0	-1.32566	0.022	0.286	0
Kcnip2	LGS:RPC vs Mouse:RPC	2	0	1.46372	0.293	0	0
Kcnk1	LGS:RPC vs Mouse:RPC	6	0	-1.33241	0.02	0.284	0
Kctd17	LGS:RPC vs Mouse:RPC	1	0	0.776682	0.144	0.001	0
Kif5c	LGS:RPC vs Mouse:RPC	1	0	1.41983	0.474	0.134	0
LAMTOR5	LGS:RPC vs Mouse:RPC	5	0	-1.77918	0	0.389	0
LDHA-containing	LGS:RPC vs Mouse:RPC	5	0	-4.3657	0.001	0.885	0
LDHB	LGS:RPC vs Mouse:RPC	5	0	-1.82228	0.001	0.383	0
Lamtor4	LGS:RPC vs Mouse:RPC	2	0	1.18812	0.48	0.187	0
Ldoc1	LGS:RPC vs Mouse:RPC	1	0	1.43688	0.296	0	0
Lgals1	LGS:RPC vs Mouse:RPC	1	0	1.43194	0.398	0.085	0
Lgi4	LGS:RPC vs Mouse:RPC	1	0	1.30665	0.276	0.025	0
Lgr4	LGS:RPC vs Mouse:RPC	1	0	1.61848	0.507	0.119	0
Lmnb2	LGS:RPC vs Mouse:RPC	1	0	1.52343	0.431	0.094	0
Lrpap1	LGS:RPC vs Mouse:RPC	2	0	1.15778	0.448	0.165	0
Lrrc42	LGS:RPC vs Mouse:RPC	6	0	-1.42718	0.107	0.449	0
Lsm1	LGS:RPC vs Mouse:RPC	5	0	-1.14469	0.005	0.23	0
Lsm5	LGS:RPC vs Mouse:RPC	1	0	1.13343	0.583	0.312	0
Lsm7	LGS:RPC vs Mouse:RPC	2	0	1.83486	0.549	0.116	0
MALAT1-containing	LGS:RPC vs Mouse:RPC	5	0	-8.48837	0.005	0.998	0
MAPRE1-like	LGS:RPC vs Mouse:RPC	5	0	-2.48801	0.007	0.582	0
MED21	LGS:RPC vs Mouse:RPC	5	0	-1.57752	0	0.331	0
MFF-like	LGS:RPC vs Mouse:RPC	5	0	-1.85723	0	0.406	0
MID1-like	LGS:RPC vs Mouse:RPC	1	0	1.05174	0.217	0.025	0
MKRN1-like	LGS:RPC vs Mouse:RPC	5	0	-1.19719	0.001	0.225	0
MORF4L1	LGS:RPC vs Mouse:RPC	5	0	-1.27032	0.003	0.25	0
MPC2	LGS:RPC vs Mouse:RPC	5	0	-1.52434	0	0.314	0
MTCH2	LGS:RPC vs Mouse:RPC	5	0	-1.75214	0	0.373	0
MYCN	LGS:RPC vs Mouse:RPC	5	0	-1.28901	0	0.233	0
MYL12A-like	LGS:RPC vs Mouse:RPC	5	0	-2.3901	0	0.551	0
Mall	LGS:RPC vs Mouse:RPC	2	0	0.589741	0.105	0	0
Map1b	LGS:RPC vs Mouse:RPC	7	0	-1.20168	0.394	0.731	0
Map6	LGS:RPC vs Mouse:RPC	2	0	1.76915	0.383	0.023	0
March3	LGS:RPC vs Mouse:RPC	1	0	0.689678	0.119	0.001	0
Marcks	LGS:RPC vs Mouse:RPC	8	0	0.636147	0.953	0.92	0
Mcm2	LGS:RPC vs Mouse:RPC	6	0	-1.54832	0.009	0.303	0
Med29	LGS:RPC vs Mouse:RPC	2	0	1.94384	0.493	0.043	0
Mef2c	LGS:RPC vs Mouse:RPC	2	0	1.05719	0.153	0.002	0
Metrn	LGS:RPC vs Mouse:RPC	6	0	-1.3454	0.156	0.489	0
Mex3d	LGS:RPC vs Mouse:RPC	1	0	1.24022	0.279	0.021	0
Mgarp	LGS:RPC vs Mouse:RPC	5	0	-2.19258	0.045	0.57	0
Mgst3	LGS:RPC vs Mouse:RPC	2	0	1.82578	0.557	0.107	0
Minos1	LGS:RPC vs Mouse:RPC	1	0	1.26651	0.834	0.558	0
Mmp15	LGS:RPC vs Mouse:RPC	1	0	0.971354	0.198	0.017	0
Moap1	LGS:RPC vs Mouse:RPC	2	0	0.784255	0.143	0	0
Mogat1	LGS:RPC vs Mouse:RPC	1	0	0.826164	0.151	0.002	0
Mpc1	LGS:RPC vs Mouse:RPC	2	0	1.72522	0.371	0.004	0
Mrpl17	LGS:RPC vs Mouse:RPC	5	0	-1.34426	0.003	0.272	0
Mrpl20	LGS:RPC vs Mouse:RPC	2	0	1.09868	0.623	0.337	0
Mrpl23	LGS:RPC vs Mouse:RPC	2	0	2.88105	0.725	0.042	0
Mrpl42	LGS:RPC vs Mouse:RPC	6	0	-1.4853	0.152	0.537	0
Mrpl53	LGS:RPC vs Mouse:RPC	2	0	0.78524	0.146	0.001	0
Mrpl55	LGS:RPC vs Mouse:RPC	2	0	1.22235	0.47	0.158	0
Mrps14	LGS:RPC vs Mouse:RPC	5	0	-1.4516	0.187	0.569	0
Mrps18b	LGS:RPC vs Mouse:RPC	2	0	0.919359	0.18	0.001	0
Mrps36	LGS:RPC vs Mouse:RPC	2	0	1.13533	0.241	0.015	0
Mrps5	LGS:RPC vs Mouse:RPC	2	0	1.21373	0.508	0.206	0
Msi1	LGS:RPC vs Mouse:RPC	5	0	-1.50606	0.052	0.391	0
Mt3	LGS:RPC vs Mouse:RPC	1	0	0.977342	0.178	0.006	0
Mybl1	LGS:RPC vs Mouse:RPC	1	0	1.13238	0.247	0.036	0
Myl6	LGS:RPC vs Mouse:RPC	2	0	2.49245	0.813	0.196	0
Myl6b	LGS:RPC vs Mouse:RPC	2	0	1.16289	0.22	0.002	0
NAP1L1-like	LGS:RPC vs Mouse:RPC	5	0	-3.08575	0.001	0.727	0
NCL-like	LGS:RPC vs Mouse:RPC	5	0	-2.45466	0.179	0.802	0
NDUFA4-like	LGS:RPC vs Mouse:RPC	5	0	-2.2955	0.117	0.711	0
NFYB	LGS:RPC vs Mouse:RPC	5	0	-1.29865	0	0.255	0
Naa50	LGS:RPC vs Mouse:RPC	5	0	-1.49923	0.011	0.323	0
Naca	LGS:RPC vs Mouse:RPC	1	0	1.04906	0.975	0.904	0
Nat14	LGS:RPC vs Mouse:RPC	2	0	1.12728	0.237	0.018	0
Nbl1	LGS:RPC vs Mouse:RPC	1	0	1.90231	0.391	0.006	0
Ncam1	LGS:RPC vs Mouse:RPC	6	0	-1.11423	0.468	0.774	0
Nck2	LGS:RPC vs Mouse:RPC	1	0	1.09309	0.234	0.008	0
Ncoa7	LGS:RPC vs Mouse:RPC	2	0	2.19291	0.566	0.055	0
Ndfip1	LGS:RPC vs Mouse:RPC	2	0	3.25333	0.8	0.064	0
Ndufa11	LGS:RPC vs Mouse:RPC	2	0	1.09724	0.688	0.411	0
Ndufa2	LGS:RPC vs Mouse:RPC	5	0	-0.946039	0.433	0.717	0
Ndufa4l2	LGS:RPC vs Mouse:RPC	5	0	-3.75177	0	0.775	0
Ndufb2	LGS:RPC vs Mouse:RPC	2	0	1.23819	0.647	0.333	0
Ndufs5	LGS:RPC vs Mouse:RPC	2	0	2.29433	0.616	0.07	0
Necab3	LGS:RPC vs Mouse:RPC	1	0	1.15642	0.211	0.016	0
Nedd4	LGS:RPC vs Mouse:RPC	5	0	-2.73413	0.009	0.66	0
Nme2	LGS:RPC vs Mouse:RPC	2	0	3.83795	0.875	0.024	0
Nme3	LGS:RPC vs Mouse:RPC	2	0	0.883708	0.157	0.008	0
Nsa2	LGS:RPC vs Mouse:RPC	1	0	1.57939	0.51	0.157	0
Nucks1	LGS:RPC vs Mouse:RPC	1	0	1.40004	0.83	0.573	0
Nudt4	LGS:RPC vs Mouse:RPC	1	0	1.0076	0.662	0.424	0
Nuf2	LGS:RPC vs Mouse:RPC	8	0	1.23935	0.347	0.136	0
Nutf2	LGS:RPC vs Mouse:RPC	1	0	1.31349	0.33	0.043	0
OSTC-like	LGS:RPC vs Mouse:RPC	5	0	-2.22676	0	0.507	0
Oxct1	LGS:RPC vs Mouse:RPC	6	0	-1.30607	0.117	0.416	0
PCNP	LGS:RPC vs Mouse:RPC	5	0	-1.26523	0.008	0.258	0
PFN2-containing	LGS:RPC vs Mouse:RPC	5	0	-3.01508	0.05	0.745	0
PNN	LGS:RPC vs Mouse:RPC	5	0	-2.00685	0	0.432	0
PNRC1-like	LGS:RPC vs Mouse:RPC	5	0	-1.56828	0	0.313	0
POLR2C-like	LGS:RPC vs Mouse:RPC	5	0	-1.73902	0	0.382	0
POLR2F-containing	LGS:RPC vs Mouse:RPC	5	0	-2.29391	0	0.528	0
POLR2L-containing	LGS:RPC vs Mouse:RPC	1	0	2.79699	0.706	0.075	0
POLR2M	LGS:RPC vs Mouse:RPC	5	0	-2.10448	0.021	0.52	0
PRDX2-like	LGS:RPC vs Mouse:RPC	5	0	-3.46994	0.001	0.821	0
PSMA6-like	LGS:RPC vs Mouse:RPC	5	0	-2.05586	0	0.459	0
PSMB6	LGS:RPC vs Mouse:RPC	5	0	-2.92456	0.002	0.708	0
PSMC1	LGS:RPC vs Mouse:RPC	5	0	-1.37085	0.001	0.275	0
PSMC5-like	LGS:RPC vs Mouse:RPC	5	0	-1.27171	0	0.253	0
PSMD7-containing	LGS:RPC vs Mouse:RPC	5	0	-2.07921	0.001	0.466	0
PSMG4-containing	LGS:RPC vs Mouse:RPC	5	0	-1.48189	0	0.296	0
PTGES3	LGS:RPC vs Mouse:RPC	5	0	-2.33028	0.002	0.537	0
PTMA	LGS:RPC vs Mouse:RPC	5	0	-5.51127	0.003	0.993	0
PTMS-like	LGS:RPC vs Mouse:RPC	3	0	1.55729	0.824	0.48	0
PTP4A2-like	LGS:RPC vs Mouse:RPC	6	0	-1.77787	0.061	0.456	0
Pabpn1	LGS:RPC vs Mouse:RPC	2	0	1.70545	0.547	0.134	0
Pax6	LGS:RPC vs Mouse:RPC	1	0	1.43334	0.92	0.685	0
Pcbd1	LGS:RPC vs Mouse:RPC	2	0	1.18051	0.295	0.044	0
Pcbp4	LGS:RPC vs Mouse:RPC	7	0	-1.20291	0.217	0.554	0
Pcsk1n	LGS:RPC vs Mouse:RPC	2	0	1.53032	0.367	0.046	0
Pdap1	LGS:RPC vs Mouse:RPC	5	0	-1.58708	0.193	0.634	0
Peg10	LGS:RPC vs Mouse:RPC	2	0	0.779146	0.132	0.003	0
Penk	LGS:RPC vs Mouse:RPC	1	0	1.37068	0.231	0.011	0
Pgam1	LGS:RPC vs Mouse:RPC	1	0	2.54142	0.575	0.009	0
Pigl	LGS:RPC vs Mouse:RPC	2	0	1.02083	0.21	0.017	0
Pkdcc	LGS:RPC vs Mouse:RPC	1	0	0.836454	0.16	0.009	0
Pkm	LGS:RPC vs Mouse:RPC	5	0	-1.95316	0.625	0.952	0
Plagl1	LGS:RPC vs Mouse:RPC	6	0	-1.90504	0.025	0.437	0
Plcl2	LGS:RPC vs Mouse:RPC	1	0	0.836988	0.144	0.005	0
Pmepa1	LGS:RPC vs Mouse:RPC	8	0	1.85848	0.874	0.497	0
Pnma1	LGS:RPC vs Mouse:RPC	1	0	0.991156	0.198	0.009	0
Pomc	LGS:RPC vs Mouse:RPC	2	0	1.3096	0.338	0.047	0
Ppa1	LGS:RPC vs Mouse:RPC	5	0	-1.31166	0.015	0.291	0
Ppdpf	LGS:RPC vs Mouse:RPC	1	0	1.37472	0.679	0.317	0
Ppia	LGS:RPC vs Mouse:RPC	1	0	2.00769	0.93	0.473	0
Ppib	LGS:RPC vs Mouse:RPC	2	0	1.41103	0.868	0.568	0
Ppp1cc	LGS:RPC vs Mouse:RPC	2	0	1.58074	0.398	0.049	0
Ppp1r14b	LGS:RPC vs Mouse:RPC	1	0	2.24557	0.727	0.168	0
Ppp2r2b	LGS:RPC vs Mouse:RPC	2	0	1.96261	0.408	0.003	0
Ppp3ca	LGS:RPC vs Mouse:RPC	5	0	-2.46579	0.059	0.653	0
Prdx6	LGS:RPC vs Mouse:RPC	6	0	-1.38637	0.277	0.643	0
Prpf4b	LGS:RPC vs Mouse:RPC	2	0	1.97811	0.731	0.234	0
Prrc2c	LGS:RPC vs Mouse:RPC	2	0	1.07488	0.626	0.342	0
Psenen	LGS:RPC vs Mouse:RPC	2	0	1.5545	0.51	0.137	0
Psmb1	LGS:RPC vs Mouse:RPC	5	0	-1.58289	0.254	0.689	0
Ptprz1	LGS:RPC vs Mouse:RPC	1	0	2.31606	0.767	0.199	0
Pxmp2	LGS:RPC vs Mouse:RPC	2	0	0.981824	0.2	0.008	0
RAB18	LGS:RPC vs Mouse:RPC	5	0	-1.54564	0	0.32	0
RAB28	LGS:RPC vs Mouse:RPC	5	0	-1.26743	0.001	0.251	0
RAB6A-like	LGS:RPC vs Mouse:RPC	5	0	-1.20313	0	0.229	0
RALA-containing	LGS:RPC vs Mouse:RPC	5	0	-1.50397	0.004	0.319	0
RAP1B	LGS:RPC vs Mouse:RPC	5	0	-1.28772	0.015	0.276	0
RBBP6-like	LGS:RPC vs Mouse:RPC	5	0	-1.23543	0.001	0.236	0
RBM39	LGS:RPC vs Mouse:RPC	5	0	-3.72522	0	0.877	0
RBM4-like	LGS:RPC vs Mouse:RPC	2	0	1.05618	0.25	0.025	0
RBX1	LGS:RPC vs Mouse:RPC	5	0	-3.03182	0	0.736	0
RCN1	LGS:RPC vs Mouse:RPC	5	0	-1.65626	0.003	0.35	0
RFC4-like	LGS:RPC vs Mouse:RPC	6	0	-1.42278	0.005	0.293	0
RHOA-like	LGS:RPC vs Mouse:RPC	5	0	-2.48618	0	0.586	0
RNF180	LGS:RPC vs Mouse:RPC	2	0	0.900963	0.168	0.001	0
RNF7	LGS:RPC vs Mouse:RPC	5	0	-2.49064	0	0.588	0
ROMO1	LGS:RPC vs Mouse:RPC	5	0	-1.77105	0.002	0.378	0
RP9-containing	LGS:RPC vs Mouse:RPC	5	0	-1.44348	0.002	0.29	0
RPL10A	LGS:RPC vs Mouse:RPC	5	0	-1.45285	0.433	0.799	0
RPL12-like	LGS:RPC vs Mouse:RPC	5	0	-3.33731	0.033	0.824	0
RPL14	LGS:RPC vs Mouse:RPC	5	0	-5.05172	0.002	0.983	0
RPL17	LGS:RPC vs Mouse:RPC	5	0	-4.13962	0.067	0.959	0
RPL18-like	LGS:RPC vs Mouse:RPC	5	0	-4.13647	0.002	0.922	0
RPL21	LGS:RPC vs Mouse:RPC	5	0	-2.83859	0.119	0.763	0
RPL23-like	LGS:RPC vs Mouse:RPC	5	0	-4.49473	0.043	0.971	0
RPL23A-like	LGS:RPC vs Mouse:RPC	5	0	-5.0841	0.002	0.981	0
RPL24-like	LGS:RPC vs Mouse:RPC	5	0	-1.56828	0.542	0.912	0
RPL26	LGS:RPC vs Mouse:RPC	5	0	-2.32942	0.207	0.557	0
RPL30-like	LGS:RPC vs Mouse:RPC	2	0	1.97301	0.976	0.697	0
RPL31	LGS:RPC vs Mouse:RPC	5	0	-4.18229	0.001	0.928	0
RPL35A	LGS:RPC vs Mouse:RPC	5	0	-2.37887	0.05	0.541	0
RPL37A-like	LGS:RPC vs Mouse:RPC	5	0	-4.765	0	0.966	0
RPL39-like	LGS:RPC vs Mouse:RPC	5	0	-3.88442	0	0.88	0
RPL4	LGS:RPC vs Mouse:RPC	5	0	-4.74898	0	0.973	0
RPL41-containing	LGS:RPC vs Mouse:RPC	5	0	-4.31181	0.121	0.983	0
RPL5	LGS:RPC vs Mouse:RPC	5	0	-2.9203	0.008	0.71	0
RPL7	LGS:RPC vs Mouse:RPC	5	0	-4.09665	0	0.924	0
RPL7A-containing	LGS:RPC vs Mouse:RPC	5	0	-3.53503	0.001	0.829	0
RPL9-like	LGS:RPC vs Mouse:RPC	5	0	-4.96757	0	0.983	0
RPS12	LGS:RPC vs Mouse:RPC	4	0	-0.829273	0.75	0.922	0
RPS13-like	LGS:RPC vs Mouse:RPC	5	0	-4.54604	0.002	0.963	0
RPS15A	LGS:RPC vs Mouse:RPC	5	0	-4.84945	0	0.979	0
RPS18-like	LGS:RPC vs Mouse:RPC	5	0	-4.80874	0	0.968	0
RPS2	LGS:RPC vs Mouse:RPC	5	0	-3.39128	0.177	0.938	0
RPS25	LGS:RPC vs Mouse:RPC	5	0	-3.6584	0.014	0.873	0
RPS26	LGS:RPC vs Mouse:RPC	5	0	-4.18863	0.003	0.922	0
RPS27	LGS:RPC vs Mouse:RPC	5	0	-5.00919	0	0.982	0
RPS27A	LGS:RPC vs Mouse:RPC	5	0	-4.93407	0	0.979	0
RPS27L-containing	LGS:RPC vs Mouse:RPC	5	0	-3.25321	0.003	0.782	0
RPS5-like	LGS:RPC vs Mouse:RPC	5	0	-5.37989	0.002	0.991	0
RPS6	LGS:RPC vs Mouse:RPC	5	0	-2.74077	0	0.504	0
RPSA	LGS:RPC vs Mouse:RPC	5	0	-4.59896	0.002	0.959	0
RSL24D1	LGS:RPC vs Mouse:RPC	5	0	-1.29303	0	0.254	0
RWDD1-like	LGS:RPC vs Mouse:RPC	5	0	-1.37444	0.001	0.276	0
Rab21	LGS:RPC vs Mouse:RPC	2	0	0.988543	0.195	0.009	0
Rab32	LGS:RPC vs Mouse:RPC	2	0	0.91806	0.163	0.003	0
Ramp1	LGS:RPC vs Mouse:RPC	2	0	1.29073	0.227	0.004	0
Ranbp1	LGS:RPC vs Mouse:RPC	6	0	-1.56845	0.532	0.909	0
Rassf8	LGS:RPC vs Mouse:RPC	2	0	1.61555	0.332	0.009	0
Rbbp4	LGS:RPC vs Mouse:RPC	6	0	-1.16106	0.246	0.568	0
Rbp1	LGS:RPC vs Mouse:RPC	1	0	2.06763	0.869	0.419	0
Rbpj	LGS:RPC vs Mouse:RPC	1	0	1.32295	0.358	0.082	0
Rcan2	LGS:RPC vs Mouse:RPC	2	0	1.19249	0.203	0.002	0
Rcc2	LGS:RPC vs Mouse:RPC	1	0	1.36837	0.502	0.179	0
Rcvrn	LGS:RPC vs Mouse:RPC	3	0	1.42967	0.204	0.002	0
Rere	LGS:RPC vs Mouse:RPC	2	0	2.2067	0.638	0.11	0
Rgs2	LGS:RPC vs Mouse:RPC	6	0	-1.42544	0.013	0.295	0
Rhob	LGS:RPC vs Mouse:RPC	1	0	1.4635	0.36	0.055	0
Rhobtb3	LGS:RPC vs Mouse:RPC	2	0	1.15398	0.304	0.06	0
Rnasek	LGS:RPC vs Mouse:RPC	2	0	1.68821	0.342	0	0
Rnf121	LGS:RPC vs Mouse:RPC	5	0	-1.36478	0.08	0.379	0
Rpl10	LGS:RPC vs Mouse:RPC	1	0	1.77573	0.997	0.897	0
Rpl13a	LGS:RPC vs Mouse:RPC	5	0	-0.882947	0.949	0.992	0
Rpl15	LGS:RPC vs Mouse:RPC	1	0	3.13328	0.994	0.501	0
Rpl19	LGS:RPC vs Mouse:RPC	2	0	1.52311	0.992	0.848	0
Rpl22	LGS:RPC vs Mouse:RPC	1	0	1.10918	0.93	0.807	0
Rpl22l1	LGS:RPC vs Mouse:RPC	6	0	-1.54927	0.491	0.881	0
Rpl27	LGS:RPC vs Mouse:RPC	2	0	1.41166	0.978	0.804	0
Rpl28	LGS:RPC vs Mouse:RPC	1	0	1.99054	0.996	0.896	0
Rpl34	LGS:RPC vs Mouse:RPC	2	0	3.32032	0.995	0.515	0
Rpl35	LGS:RPC vs Mouse:RPC	1	0	2.06408	0.991	0.634	0
Rpl36	LGS:RPC vs Mouse:RPC	1	0	0.769803	0.959	0.87	0
Rpl36al	LGS:RPC vs Mouse:RPC	2	0	1.41857	0.679	0.323	0
Rpl37	LGS:RPC vs Mouse:RPC	2	0	0.824004	0.984	0.938	0
Rpl38	LGS:RPC vs Mouse:RPC	1	0	2.00007	0.98	0.742	0
Rpl6	LGS:RPC vs Mouse:RPC	1	0	1.53419	0.994	0.908	0
Rpl8	LGS:RPC vs Mouse:RPC	1	0	0.852142	0.996	0.976	0
Rplp0	LGS:RPC vs Mouse:RPC	1	0	1.02072	1	0.988	0
Rplp1	LGS:RPC vs Mouse:RPC	2	0	1.91701	0.999	0.956	0
Rplp2	LGS:RPC vs Mouse:RPC	1	0	0.865588	0.995	0.976	0
Rprd1a	LGS:RPC vs Mouse:RPC	2	0	0.920225	0.184	0.016	0
Rps10	LGS:RPC vs Mouse:RPC	1	0	1.54717	0.995	0.923	0
Rps11	LGS:RPC vs Mouse:RPC	1	0	0.843942	0.989	0.963	0
Rps14	LGS:RPC vs Mouse:RPC	2	0	0.470354	0.997	0.994	0
Rps15	LGS:RPC vs Mouse:RPC	1	0	1.01701	0.997	0.97	0
Rps16	LGS:RPC vs Mouse:RPC	1	0	1.11562	0.991	0.908	0
Rps21	LGS:RPC vs Mouse:RPC	1	0	0.96262	0.915	0.772	0
Rps23	LGS:RPC vs Mouse:RPC	1	0	0.601699	0.984	0.958	0
Rps24	LGS:RPC vs Mouse:RPC	1	0	1.23006	0.993	0.924	0
Rps28	LGS:RPC vs Mouse:RPC	2	0	1.84098	0.973	0.692	0
Rps29	LGS:RPC vs Mouse:RPC	2	0	1.82032	0.992	0.91	0
Rps7	LGS:RPC vs Mouse:RPC	2	0	1.10599	0.996	0.968	0
Rps8	LGS:RPC vs Mouse:RPC	1	0	0.61232	0.997	0.99	0
Rps9	LGS:RPC vs Mouse:RPC	2	0	0.593076	0.995	0.985	0
Rrm2	LGS:RPC vs Mouse:RPC	6	0	-2.01803	0.022	0.392	0
Rtn4	LGS:RPC vs Mouse:RPC	1	0	1.41974	0.876	0.6	0
SCHIP1	LGS:RPC vs Mouse:RPC	2	0	1.14974	0.238	0.009	0
SDHD-like	LGS:RPC vs Mouse:RPC	5	0	-1.38754	0	0.281	0
SEPT7-like	LGS:RPC vs Mouse:RPC	5	0	-2.3996	0.002	0.555	0
SERP1-like	LGS:RPC vs Mouse:RPC	5	0	-1.4725	0.008	0.31	0
SET-like	LGS:RPC vs Mouse:RPC	5	0	-2.83681	0	0.637	0
SF1-like	LGS:RPC vs Mouse:RPC	5	0	-1.2063	0	0.235	0
SNRPA1	LGS:RPC vs Mouse:RPC	5	0	-1.9594	0	0.432	0
SNRPB	LGS:RPC vs Mouse:RPC	5	0	-2.66249	0.095	0.768	0
SNRPB2-containing	LGS:RPC vs Mouse:RPC	5	0	-2.0798	0	0.463	0
SNRPE-like	LGS:RPC vs Mouse:RPC	5	0	-2.68216	0.068	0.734	0
SNRPG	LGS:RPC vs Mouse:RPC	5	0	-3.15392	0.003	0.728	0
SOX11	LGS:RPC vs Mouse:RPC	5	0	-2.28709	0.016	0.521	0
SOX2	LGS:RPC vs Mouse:RPC	6	0	-2.10799	0.001	0.443	0
SOX4-like	LGS:RPC vs Mouse:RPC	5	0	-1.80915	0.283	0.684	0
SPCS2-like	LGS:RPC vs Mouse:RPC	5	0	-2.43191	0	0.567	0
SRSF10	LGS:RPC vs Mouse:RPC	5	0	-1.98763	0	0.438	0
SRSF3	LGS:RPC vs Mouse:RPC	5	0	-4.00618	0	0.896	0
SSR1-like	LGS:RPC vs Mouse:RPC	5	0	-1.58438	0	0.33	0
ST13-like	LGS:RPC vs Mouse:RPC	5	0	-2.04593	0	0.451	0
STMN1	LGS:RPC vs Mouse:RPC	1	0	2.39633	0.744	0.152	0
SUMO1	LGS:RPC vs Mouse:RPC	5	0	-2.79797	0	0.678	0
Sae1	LGS:RPC vs Mouse:RPC	6	0	-1.66922	0.035	0.411	0
Samd1	LGS:RPC vs Mouse:RPC	1	0	1.04351	0.216	0.015	0
Sap18	LGS:RPC vs Mouse:RPC	1	0	1.18158	0.491	0.19	0
Sapcd1	LGS:RPC vs Mouse:RPC	6	0	-2.26657	0.002	0.51	0
Scand1	LGS:RPC vs Mouse:RPC	5	0	-1.41542	0.046	0.352	0
Sec61g	LGS:RPC vs Mouse:RPC	2	0	2.43196	0.677	0.088	0
Sema5a	LGS:RPC vs Mouse:RPC	1	0	1.27233	0.418	0.116	0
Sept1	LGS:RPC vs Mouse:RPC	1	0	0.921222	0.223	0.028	0
Serf2	LGS:RPC vs Mouse:RPC	2	0	2.62274	0.871	0.251	0
Serpinh1	LGS:RPC vs Mouse:RPC	5	0	-1.41803	0.03	0.324	0
Sf3b2	LGS:RPC vs Mouse:RPC	5	0	-1.1744	0.413	0.747	0
Sfr1	LGS:RPC vs Mouse:RPC	1	0	1.04193	0.854	0.644	0
Sfxn5	LGS:RPC vs Mouse:RPC	1	0	0.934651	0.175	0.008	0
Sh3bgrl	LGS:RPC vs Mouse:RPC	1	0	1.76284	0.691	0.243	0
Slbp	LGS:RPC vs Mouse:RPC	1	0	1.85041	0.474	0.12	0
Slc16a1	LGS:RPC vs Mouse:RPC	1	0	1.50226	0.406	0.064	0
Slc25a3	LGS:RPC vs Mouse:RPC	2	0	0.799099	0.812	0.657	0
Slc25a4	LGS:RPC vs Mouse:RPC	5	0	-1.45476	0.316	0.718	0
Slc27a5	LGS:RPC vs Mouse:RPC	2	0	0.838017	0.148	0	0
Slc3a2	LGS:RPC vs Mouse:RPC	5	0	-1.34889	0.033	0.303	0
Smarce1	LGS:RPC vs Mouse:RPC	2	0	1.18759	0.523	0.23	0
Snrpc	LGS:RPC vs Mouse:RPC	2	0	1.18188	0.504	0.197	0
Sod1	LGS:RPC vs Mouse:RPC	2	0	1.96681	0.604	0.122	0
Spc25	LGS:RPC vs Mouse:RPC	8	0	-1.40247	0.223	0.495	0
Sptssa	LGS:RPC vs Mouse:RPC	5	0	-1.59166	0.311	0.731	0
Srgap3	LGS:RPC vs Mouse:RPC	1	0	1.85378	0.542	0.125	0
Srsf6	LGS:RPC vs Mouse:RPC	5	0	-1.13477	0.321	0.638	0
Srsf9	LGS:RPC vs Mouse:RPC	1	0	1.20351	0.714	0.431	0
Ssbp4	LGS:RPC vs Mouse:RPC	5	0	-1.52511	0.003	0.319	0
Ssr4	LGS:RPC vs Mouse:RPC	2	0	1.52254	0.723	0.344	0
Ssrp1	LGS:RPC vs Mouse:RPC	6	0	-1.24101	0.202	0.537	0
Ssx2ip	LGS:RPC vs Mouse:RPC	1	0	2.61671	0.7	0.126	0
Stmn2	LGS:RPC vs Mouse:RPC	2	0	2.31959	0.643	0.116	0
Ston2	LGS:RPC vs Mouse:RPC	1	0	1.04926	0.259	0.042	0
Sulf1	LGS:RPC vs Mouse:RPC	1	0	1.48677	0.304	0.016	0
Svil	LGS:RPC vs Mouse:RPC	2	0	1.12622	0.216	0.021	0
Sync	LGS:RPC vs Mouse:RPC	2	0	2.29456	0.405	0	0
TCF15-like	LGS:RPC vs Mouse:RPC	1	0	0.788142	0.149	0.007	0
TCF3-containing	LGS:RPC vs Mouse:RPC	6	0	-1.3098	0.05	0.335	0
TCP1-like	LGS:RPC vs Mouse:RPC	5	0	-2.23897	0.002	0.52	0
TIMM17A	LGS:RPC vs Mouse:RPC	5	0	-1.2482	0	0.243	0
TIMM23	LGS:RPC vs Mouse:RPC	2	0	1.30918	0.294	0.018	0
TMED2	LGS:RPC vs Mouse:RPC	5	0	-1.82336	0.039	0.439	0
TMED9-like	LGS:RPC vs Mouse:RPC	5	0	-2.10125	0.004	0.479	0
TMEM230	LGS:RPC vs Mouse:RPC	5	0	-1.12114	0	0.212	0
TMSB4X	LGS:RPC vs Mouse:RPC	1	0	2.18892	0.999	0.921	0
TPM3	LGS:RPC vs Mouse:RPC	6	0	-1.65466	0.001	0.349	0
TPM4	LGS:RPC vs Mouse:RPC	5	0	-1.71627	0.001	0.356	0
TTC14	LGS:RPC vs Mouse:RPC	5	0	-1.67799	0.002	0.348	0
TTC3-like	LGS:RPC vs Mouse:RPC	5	0	-2.30406	0	0.515	0
TUBB2B	LGS:RPC vs Mouse:RPC	5	0	-1.72949	0	0.357	0
Taf7	LGS:RPC vs Mouse:RPC	2	0	1.19731	0.469	0.171	0
Taf9	LGS:RPC vs Mouse:RPC	2	0	2.50014	0.57	0.001	0
Tagln3	LGS:RPC vs Mouse:RPC	2	0	1.4868	0.491	0.149	0
Tax1bp3	LGS:RPC vs Mouse:RPC	1	0	0.722656	0.125	0.002	0
Tceal7	LGS:RPC vs Mouse:RPC	2	0	1.65893	0.346	0.001	0
Tdg	LGS:RPC vs Mouse:RPC	2	0	1.21056	0.254	0.015	0
Tdp2	LGS:RPC vs Mouse:RPC	5	0	-1.38846	0.002	0.284	0
Tesk2	LGS:RPC vs Mouse:RPC	2	0	1.50046	0.319	0.014	0
Tfdp1	LGS:RPC vs Mouse:RPC	2	0	0.886918	0.169	0.004	0
Tgfb2	LGS:RPC vs Mouse:RPC	6	0	-1.31261	0.081	0.381	0
Thoc3	LGS:RPC vs Mouse:RPC	5	0	-1.56317	0.004	0.328	0
Timm17b	LGS:RPC vs Mouse:RPC	5	0	-1.30743	0.001	0.265	0
Timp1	LGS:RPC vs Mouse:RPC	2	0	0.911417	0.162	0.003	0
Tipin	LGS:RPC vs Mouse:RPC	6	0	-2.14769	0.081	0.594	0
Tm2d2	LGS:RPC vs Mouse:RPC	5	0	-1.18752	0.003	0.236	0
Tma7	LGS:RPC vs Mouse:RPC	5	0	-1.31987	0	0.254	0
Tmem18	LGS:RPC vs Mouse:RPC	1	0	1.14581	0.315	0.063	0
Tmem234	LGS:RPC vs Mouse:RPC	5	0	-1.78815	0.063	0.491	0
Tmem37	LGS:RPC vs Mouse:RPC	1	0	1.90361	0.452	0.046	0
Tmem98	LGS:RPC vs Mouse:RPC	1	0	1.78931	0.474	0.057	0
Tmsb10	LGS:RPC vs Mouse:RPC	1	0	1.57965	0.968	0.743	0
Tomm20	LGS:RPC vs Mouse:RPC	2	0	1.22806	0.392	0.107	0
Tomm22	LGS:RPC vs Mouse:RPC	5	0	-1.35087	0.055	0.355	0
Tomm6	LGS:RPC vs Mouse:RPC	2	0	2.03527	0.546	0.065	0
Tpd52	LGS:RPC vs Mouse:RPC	7	0	-1.36538	0.101	0.436	0
Tra2b	LGS:RPC vs Mouse:RPC	1	0	0.859637	0.812	0.676	0
Traf3ip1	LGS:RPC vs Mouse:RPC	1	0	1.21503	0.321	0.07	0
Tsn	LGS:RPC vs Mouse:RPC	5	0	-1.44636	0.278	0.667	0
Tspan13	LGS:RPC vs Mouse:RPC	5	0	-1.65547	0.061	0.443	0
Tspan3	LGS:RPC vs Mouse:RPC	5	0	-1.21872	0.34	0.682	0
Tspo	LGS:RPC vs Mouse:RPC	1	0	2.7889	0.757	0.081	0
Tst	LGS:RPC vs Mouse:RPC	1	0	1.62003	0.333	0.031	0
Tubb3	LGS:RPC vs Mouse:RPC	4	0	1.51531	0.423	0.088	0
Tulp4	LGS:RPC vs Mouse:RPC	2	0	1.38074	0.439	0.107	0
Tut1	LGS:RPC vs Mouse:RPC	2	0	3.59493	0.847	0.022	0
Tyms	LGS:RPC vs Mouse:RPC	6	0	-1.55992	0.06	0.376	0
U2af1	LGS:RPC vs Mouse:RPC	1	0	0.989944	0.743	0.506	0
UBA52	LGS:RPC vs Mouse:RPC	5	0	-1.58947	0.006	0.336	0
UBB-containing	LGS:RPC vs Mouse:RPC	5	0	-1.7265	0.166	0.46	0
UBE2D3	LGS:RPC vs Mouse:RPC	5	0	-2.82412	0	0.68	0
UBE2E3	LGS:RPC vs Mouse:RPC	5	0	-2.43225	0.024	0.606	0
UBE2N-like	LGS:RPC vs Mouse:RPC	1	0	1.48694	0.487	0.127	0
Ube2m	LGS:RPC vs Mouse:RPC	2	0	1.5723	0.441	0.084	0
Ube2s	LGS:RPC vs Mouse:RPC	1	0	2.25157	0.487	0.043	0
Ube2v2	LGS:RPC vs Mouse:RPC	2	0	1.53474	0.363	0.026	0
Uchl1	LGS:RPC vs Mouse:RPC	1	0	2.31941	0.658	0.093	0
Ucp2	LGS:RPC vs Mouse:RPC	1	0	1.64544	0.335	0.015	0
Upf3a	LGS:RPC vs Mouse:RPC	2	0	1.7281	0.53	0.113	0
Usmg5	LGS:RPC vs Mouse:RPC	2	0	1.05577	0.609	0.34	0
Usp10	LGS:RPC vs Mouse:RPC	1	0	1.21042	0.412	0.123	0
Vax2	LGS:RPC vs Mouse:RPC	1	0	1.37721	0.355	0.066	0
Vim	LGS:RPC vs Mouse:RPC	1	0	1.89443	0.903	0.544	0
Vkorc1	LGS:RPC vs Mouse:RPC	1	0	1.21636	0.394	0.104	0
Vps13c	LGS:RPC vs Mouse:RPC	2	0	0.895518	0.167	0.009	0
Vps25	LGS:RPC vs Mouse:RPC	2	0	1.00644	0.208	0.015	0
WBP11-like	LGS:RPC vs Mouse:RPC	5	0	-1.37525	0	0.277	0
Wdr76	LGS:RPC vs Mouse:RPC	1	0	1.33169	0.373	0.125	0
Wdr83os	LGS:RPC vs Mouse:RPC	2	0	1.73627	0.529	0.099	0
Wdr89	LGS:RPC vs Mouse:RPC	5	0	-1.95181	0.014	0.417	0
XIST-containing	LGS:RPC vs Mouse:RPC	5	0	-2.10888	0.494	0.556	0
YWHAZ	LGS:RPC vs Mouse:RPC	5	0	-1.41242	0.001	0.283	0
ZFAND5-like	LGS:RPC vs Mouse:RPC	5	0	-1.47174	0.004	0.305	0
Zbed5	LGS:RPC vs Mouse:RPC	2	0	1.32401	0.266	0.004	0
Zc3h11a	LGS:RPC vs Mouse:RPC	2	0	1.36391	0.291	0.013	0
Zfp36l1	LGS:RPC vs Mouse:RPC	6	0	-1.38417	0.284	0.635	0
Zfp36l2	LGS:RPC vs Mouse:RPC	1	0	1.8129	0.546	0.124	0
Zwint	LGS:RPC vs Mouse:RPC	5	0	-1.27669	0.093	0.385	0
Hspd1	LGS:RPC vs Mouse:RPC	6	0	-1.19588	0.159	0.468	0
MMADHC-like	LGS:RPC vs Mouse:RPC	5	0	-1.09897	0.001	0.209	0
YY1-like	LGS:RPC vs Mouse:RPC	5	0	-1.07065	0	0.203	0
TOB1	LGS:RPC vs Mouse:RPC	5	0	-1.15392	0.002	0.212	0
Son	LGS:RPC vs Mouse:RPC	3	0	0.777568	0.853	0.707	0
Casz1	LGS:RPC vs Mouse:RPC	5	0	-1.23278	0.024	0.269	0
Adprh	LGS:RPC vs Mouse:RPC	5	0	-1.15156	0.015	0.25	0
Mzt1	LGS:RPC vs Mouse:RPC	5	0	-1.19665	0.02	0.257	0
Mfsd10	LGS:RPC vs Mouse:RPC	1	0	1.17187	0.396	0.127	0
Stk25	LGS:RPC vs Mouse:RPC	2	0	1.09255	0.327	0.08	0
PDCD10-like	LGS:RPC vs Mouse:RPC	5	0	-1.07536	0	0.2	0
Svip	LGS:RPC vs Mouse:RPC	3	0	1.01305	0.222	0.03	0
CIAPIN1	LGS:RPC vs Mouse:RPC	5	0	-1.02262	0	0.2	0
Alkbh1	LGS:RPC vs Mouse:RPC	5	0	-1.27618	0.03	0.272	0
Osgep	LGS:RPC vs Mouse:RPC	5	0	-1.11917	0.003	0.214	0
Cggbp1	LGS:RPC vs Mouse:RPC	2	0	1.10806	0.49	0.214	0
Hnrnph1	LGS:RPC vs Mouse:RPC	1	0	1.00451	0.598	0.348	0
Pla2g16	LGS:RPC vs Mouse:RPC	8	0	-1.23015	0.058	0.331	0
Lcor	LGS:RPC vs Mouse:RPC	2	0	0.904851	0.211	0.026	0
Arl6ip6	LGS:RPC vs Mouse:RPC	5	0	-1.27956	0.073	0.345	0
Kidins220	LGS:RPC vs Mouse:RPC	2	0	1.0111	0.233	0.036	2.13234e-307
Ccdc25	LGS:RPC vs Mouse:RPC	1	0	1.13004	0.392	0.128	3.5857e-307
Prr14l	LGS:RPC vs Mouse:RPC	2	0	0.871466	0.191	0.02	2.13364e-306
Fam213a	LGS:RPC vs Mouse:RPC	2	0	1.13371	0.417	0.148	2.2547e-305
Ddx39b	LGS:RPC vs Mouse:RPC	6	0	-0.970719	0.386	0.654	3.15246e-305
NUDT3-like	LGS:RPC vs Mouse:RPC	2	0	1.10377	0.321	0.081	4.86311e-305
Scg3	LGS:RPC vs Mouse:RPC	3	0	0.829196	0.157	0.01	2.33891e-304
Edf1	LGS:RPC vs Mouse:RPC	2	0	0.839489	0.709	0.525	2.38128e-304
Abhd11	LGS:RPC vs Mouse:RPC	2	3.03583e-308	1.00904	0.263	0.049	4.07772e-304
Ly6h	LGS:RPC vs Mouse:RPC	2	3.44886e-308	0.791671	0.15	0.009	4.63251e-304
HMGN2	LGS:RPC vs Mouse:RPC	6	1.16631e-307	-1.22968	0.141	0.42	1.56658e-303
Naa38	LGS:RPC vs Mouse:RPC	2	1.90037e-307	1.08579	0.48	0.207	2.55258e-303
Rrh	LGS:RPC vs Mouse:RPC	6	8.11871e-306	-1.10178	0.001	0.201	1.0905e-301
RBM7-like	LGS:RPC vs Mouse:RPC	5	2.1208e-304	-1.04375	0	0.192	2.84866e-300
Igfbp7	LGS:RPC vs Mouse:RPC	1	1.02563e-303	0.898588	0.155	0.01	1.37763e-299
Ptov1	LGS:RPC vs Mouse:RPC	5	4.03088e-303	-1.00056	0.31	0.606	5.41427e-299
Epb41l3	LGS:RPC vs Mouse:RPC	2	2.13215e-302	1.03026	0.271	0.055	2.86391e-298
IFT20	LGS:RPC vs Mouse:RPC	5	7.33335e-300	-1.03471	0	0.19	9.85015e-296
Krt10	LGS:RPC vs Mouse:RPC	2	8.91631e-300	1.09037	0.47	0.198	1.19764e-295
RNF2-like	LGS:RPC vs Mouse:RPC	5	1.43769e-299	-1.00406	0	0.19	1.93111e-295
FRMD4B	LGS:RPC vs Mouse:RPC	5	1.47002e-299	-1.11243	0.001	0.194	1.97453e-295
Ewsr1	LGS:RPC vs Mouse:RPC	5	1.74963e-299	-0.999477	0.327	0.608	2.35011e-295
Smpd5	LGS:RPC vs Mouse:RPC	2	3.71716e-299	0.586922	0.097	0	4.9929e-295
Med10	LGS:RPC vs Mouse:RPC	1	5.62333e-299	1.02665	0.529	0.267	7.55326e-295
UBE2G1-like	LGS:RPC vs Mouse:RPC	5	7.56494e-299	-1.02317	0.001	0.195	1.01612e-294
Ruvbl1	LGS:RPC vs Mouse:RPC	1	1.18821e-297	1.06629	0.476	0.208	1.59601e-293
Oxld1	LGS:RPC vs Mouse:RPC	2	2.28113e-297	0.88881	0.219	0.032	3.06401e-293
Gsto1	LGS:RPC vs Mouse:RPC	2	8.43801e-297	1.01153	0.285	0.062	1.13339e-292
Dync1h1	LGS:RPC vs Mouse:RPC	2	9.54736e-297	1.05724	0.313	0.078	1.2824e-292
Frat2	LGS:RPC vs Mouse:RPC	6	3.15079e-294	-1.27895	0.083	0.344	4.23215e-290
Sec11c	LGS:RPC vs Mouse:RPC	2	6.74411e-293	0.999538	0.253	0.048	9.05869e-289
ATP1B3	LGS:RPC vs Mouse:RPC	6	1.8211e-292	-1.0938	0.009	0.22	2.4461e-288
Cenpa	LGS:RPC vs Mouse:RPC	6	2.37764e-292	-1.60481	0.11	0.349	3.19365e-288
KCNQ1OT1-like	LGS:RPC vs Mouse:RPC	5	3.94656e-292	-1.26367	0.035	0.274	5.30102e-288
Emc4	LGS:RPC vs Mouse:RPC	2	6.63753e-292	0.995692	0.273	0.057	8.91554e-288
Iscu	LGS:RPC vs Mouse:RPC	2	1.76837e-291	1.12631	0.36	0.115	2.37528e-287
GPM6B-like	LGS:RPC vs Mouse:RPC	5	2.02477e-291	-1.03435	0.296	0.599	2.71967e-287
Mpzl1	LGS:RPC vs Mouse:RPC	5	2.80981e-291	-1.05504	0.007	0.212	3.77414e-287
Csrp2	LGS:RPC vs Mouse:RPC	8	8.33796e-291	-0.93818	0.418	0.691	1.11995e-286
TMEM126A	LGS:RPC vs Mouse:RPC	5	1.68704e-290	-1.03677	0.003	0.197	2.26603e-286
LUC7L2	LGS:RPC vs Mouse:RPC	5	3.47964e-290	-1.07769	0.241	0.529	4.67385e-286
Sparc	LGS:RPC vs Mouse:RPC	6	4.60708e-290	-1.16801	0.156	0.455	6.18823e-286
RPN1-containing	LGS:RPC vs Mouse:RPC	5	6.71102e-289	-1.07349	0.008	0.215	9.01424e-285
Lman1	LGS:RPC vs Mouse:RPC	6	1.02633e-288	-1.11428	0.269	0.549	1.37856e-284
RNF11	LGS:RPC vs Mouse:RPC	5	1.15566e-288	-1.00749	0	0.185	1.55229e-284
Pemt	LGS:RPC vs Mouse:RPC	1	2.00571e-288	0.857687	0.173	0.017	2.69407e-284
Churc1	LGS:RPC vs Mouse:RPC	2	1.67976e-287	1.04007	0.41	0.143	2.25625e-283
OXA1L-like	LGS:RPC vs Mouse:RPC	5	3.40274e-287	-0.982952	0	0.182	4.57055e-283
Fam216a	LGS:RPC vs Mouse:RPC	5	1.96353e-286	-1.10438	0.024	0.248	2.63742e-282
Usp12	LGS:RPC vs Mouse:RPC	2	5.28846e-286	0.733049	0.142	0.009	7.10347e-282
SCRN1	LGS:RPC vs Mouse:RPC	6	8.07687e-286	-1.0307	0.005	0.203	1.08489e-281
Pebp1	LGS:RPC vs Mouse:RPC	1	4.18572e-285	0.810033	0.76	0.529	5.62226e-281
Jam3	LGS:RPC vs Mouse:RPC	6	4.9796e-285	-1.14809	0.14	0.416	6.68859e-281
RND3-like	LGS:RPC vs Mouse:RPC	5	6.77275e-285	-1.03793	0.001	0.187	9.09716e-281
Gcsh	LGS:RPC vs Mouse:RPC	5	1.29797e-284	-1.09034	0.011	0.218	1.74344e-280
Syncrip	LGS:RPC vs Mouse:RPC	1	2.42662e-284	0.950375	0.567	0.33	3.25943e-280
Rab5a	LGS:RPC vs Mouse:RPC	2	1.36082e-283	0.879658	0.175	0.018	1.82786e-279
TIPRL-like	LGS:RPC vs Mouse:RPC	5	1.70606e-283	-0.981135	0.001	0.188	2.29158e-279
Rps19	LGS:RPC vs Mouse:RPC	1	5.22062e-283	0.431386	0.998	0.988	7.01233e-279
Pmm1	LGS:RPC vs Mouse:RPC	5	5.54699e-283	-1.19538	0.096	0.36	7.45071e-279
Rbm25	LGS:RPC vs Mouse:RPC	5	2.8599e-281	-0.998656	0.318	0.591	3.84142e-277
Pde6h	LGS:RPC vs Mouse:RPC	3	7.85147e-281	0.752462	0.091	0	1.05461e-276
Brd1	LGS:RPC vs Mouse:RPC	2	8.12096e-281	0.866982	0.206	0.03	1.09081e-276
NME1	LGS:RPC vs Mouse:RPC	4	1.08345e-279	-0.971336	0.353	0.632	1.4553e-275
Sec61b	LGS:RPC vs Mouse:RPC	2	1.517e-279	0.841625	0.687	0.485	2.03763e-275
Prkaca	LGS:RPC vs Mouse:RPC	5	1.55968e-279	-1.06447	0.01	0.213	2.09496e-275
Ormdl1	LGS:RPC vs Mouse:RPC	5	2.43989e-278	-1.13879	0.042	0.277	3.27726e-274
Snrpn	LGS:RPC vs Mouse:RPC	2	1.00618e-277	1.06657	0.399	0.143	1.35151e-273
Zscan18	LGS:RPC vs Mouse:RPC	2	2.84584e-277	0.72406	0.14	0.009	3.82253e-273
Prpf19	LGS:RPC vs Mouse:RPC	5	3.47701e-277	-1.12457	0.138	0.408	4.67032e-273
Cdca4	LGS:RPC vs Mouse:RPC	6	4.29875e-277	-0.959837	0.001	0.183	5.77409e-273
ADIPOR1	LGS:RPC vs Mouse:RPC	5	9.22576e-277	-0.972894	0	0.179	1.2392e-272
Pcp2	LGS:RPC vs Mouse:RPC	3	9.87059e-277	0.880891	0.103	0.002	1.32582e-272
Sfrp2	LGS:RPC vs Mouse:RPC	6	1.03632e-276	-1.32361	0.019	0.228	1.39198e-272
Klf9	LGS:RPC vs Mouse:RPC	5	6.11096e-276	-1.12723	0.016	0.228	8.20824e-272
Hddc2	LGS:RPC vs Mouse:RPC	5	3.94154e-275	-1.02895	0.002	0.186	5.29428e-271
Trmt112	LGS:RPC vs Mouse:RPC	2	1.5466e-274	1.00938	0.367	0.118	2.07739e-270
Rnps1	LGS:RPC vs Mouse:RPC	1	5.33261e-274	1.03269	0.392	0.135	7.16276e-270
Six3	LGS:RPC vs Mouse:RPC	6	7.1588e-274	-0.968601	0.367	0.618	9.6157e-270
Mturn	LGS:RPC vs Mouse:RPC	2	1.02798e-273	0.796295	0.159	0.014	1.38079e-269
UBE2R2	LGS:RPC vs Mouse:RPC	5	2.22106e-273	-1.05072	0.011	0.214	2.98332e-269
VAMP7	LGS:RPC vs Mouse:RPC	5	2.44437e-273	-0.973011	0	0.174	3.28327e-269
Tuba1a	LGS:RPC vs Mouse:RPC	1	2.47524e-273	0.516127	0.992	0.98	3.32474e-269
Rhot1	LGS:RPC vs Mouse:RPC	2	3.00946e-273	1.01504	0.331	0.095	4.0423e-269
Mab21l1	LGS:RPC vs Mouse:RPC	3	4.50554e-273	1.06736	0.335	0.099	6.05184e-269
Fam162a	LGS:RPC vs Mouse:RPC	6	4.95935e-273	-1.07993	0.23	0.508	6.6614e-269
Ap1s1	LGS:RPC vs Mouse:RPC	6	5.56457e-273	-1.03625	0.009	0.207	7.47433e-269
Zcchc3	LGS:RPC vs Mouse:RPC	5	5.68182e-272	-0.966053	0.001	0.179	7.63182e-268
Rpl13	LGS:RPC vs Mouse:RPC	1	2.43018e-270	0.460896	0.995	0.984	3.26422e-266
Hspa9	LGS:RPC vs Mouse:RPC	5	3.04383e-270	-1.11055	0.106	0.374	4.08847e-266
Nisch	LGS:RPC vs Mouse:RPC	5	4.72423e-270	-1.13648	0.062	0.31	6.34559e-266
Gnb4	LGS:RPC vs Mouse:RPC	1	6.41581e-270	1.07896	0.357	0.118	8.61771e-266
Txnip	LGS:RPC vs Mouse:RPC	5	6.65388e-270	-1.34697	0.037	0.263	8.93749e-266
CAMTA1-containing	LGS:RPC vs Mouse:RPC	5	7.78855e-270	-1.13707	0.119	0.382	1.04616e-265
Tjp1	LGS:RPC vs Mouse:RPC	2	1.22139e-269	1.00837	0.299	0.078	1.64057e-265
Abracl	LGS:RPC vs Mouse:RPC	5	1.60367e-269	-1.1203	0.02	0.231	2.15405e-265
TPT1	LGS:RPC vs Mouse:RPC	6	1.09894e-268	-0.735786	0.76	0.887	1.4761e-264
Rad51b	LGS:RPC vs Mouse:RPC	2	1.11185e-268	0.573823	0.107	0.003	1.49344e-264
Paqr3	LGS:RPC vs Mouse:RPC	2	1.31212e-268	0.661739	0.125	0.006	1.76244e-264
Kcna4	LGS:RPC vs Mouse:RPC	1	3.58959e-268	0.529936	0.095	0.001	4.82153e-264
Fubp1	LGS:RPC vs Mouse:RPC	5	5.15583e-268	-0.996749	0.29	0.563	6.92531e-264
Wnk3	LGS:RPC vs Mouse:RPC	2	7.96725e-268	0.751585	0.15	0.013	1.07016e-263
Trank1	LGS:RPC vs Mouse:RPC	1	2.9616e-267	0.503217	0.087	0	3.97803e-263
Dhx9	LGS:RPC vs Mouse:RPC	2	5.35341e-267	1.0497	0.394	0.141	7.19069e-263
Id2	LGS:RPC vs Mouse:RPC	8	6.57106e-267	-1.08265	0.44	0.684	8.82625e-263
Ccnb1	LGS:RPC vs Mouse:RPC	8	6.09884e-266	-1.52287	0.11	0.337	8.19196e-262
Top1	LGS:RPC vs Mouse:RPC	2	1.12173e-265	0.880931	0.652	0.449	1.50671e-261
Syt1	LGS:RPC vs Mouse:RPC	3	1.27702e-265	1.12193	0.295	0.087	1.7153e-261
Tmem86b	LGS:RPC vs Mouse:RPC	2	2.49951e-265	0.541187	0.095	0.001	3.35734e-261
Rsf1	LGS:RPC vs Mouse:RPC	2	8.14026e-265	1.03313	0.422	0.167	1.0934e-260
Star	LGS:RPC vs Mouse:RPC	2	9.48332e-265	0.667338	0.112	0.004	1.2738e-260
Hnrnpu	LGS:RPC vs Mouse:RPC	6	9.41384e-264	-0.841	0.474	0.719	1.26447e-259
Btbd17	LGS:RPC vs Mouse:RPC	5	9.70709e-264	-1.12649	0.007	0.193	1.30386e-259
Serpine2	LGS:RPC vs Mouse:RPC	6	1.32306e-262	-0.988613	0.002	0.179	1.77714e-258
Sf3b5	LGS:RPC vs Mouse:RPC	1	6.79112e-262	0.798562	0.662	0.475	9.12184e-258
Pmp22	LGS:RPC vs Mouse:RPC	6	1.30805e-261	-1.09987	0.027	0.242	1.75697e-257
Nhsl1	LGS:RPC vs Mouse:RPC	2	1.43415e-261	0.734631	0.147	0.012	1.92635e-257
Pfn1	LGS:RPC vs Mouse:RPC	6	3.19582e-261	-0.903209	0.398	0.64	4.29262e-257
Fgf8	LGS:RPC vs Mouse:RPC	1	7.18313e-260	0.638382	0.121	0.006	9.64837e-256
Dusp6	LGS:RPC vs Mouse:RPC	6	1.00495e-259	-1.17508	0.093	0.332	1.34985e-255
AP4S1	LGS:RPC vs Mouse:RPC	5	1.31917e-259	-0.930932	0	0.166	1.77191e-255
Tonsl	LGS:RPC vs Mouse:RPC	5	1.83088e-259	-1.08601	0.032	0.249	2.45924e-255
Irf2bp2	LGS:RPC vs Mouse:RPC	1	3.56421e-259	1.03374	0.362	0.122	4.78745e-255
PIGF	LGS:RPC vs Mouse:RPC	5	4.1556e-259	-0.90454	0	0.166	5.58181e-255
Ubtd2	LGS:RPC vs Mouse:RPC	2	4.39347e-259	0.694515	0.145	0.012	5.90131e-255
Sfrp1	LGS:RPC vs Mouse:RPC	1	1.87378e-258	1.16346	0.347	0.124	2.51686e-254
Rps3	LGS:RPC vs Mouse:RPC	4	3.30795e-258	-0.438429	0.945	0.981	4.44324e-254
Nrcam	LGS:RPC vs Mouse:RPC	1	4.60032e-258	1.01978	0.313	0.092	6.17915e-254
Dhx32	LGS:RPC vs Mouse:RPC	5	4.82041e-258	-1.17528	0.114	0.368	6.47478e-254
Nucb2	LGS:RPC vs Mouse:RPC	2	5.65472e-258	0.996927	0.271	0.066	7.59542e-254
Ccdc85b	LGS:RPC vs Mouse:RPC	2	7.52327e-258	0.801915	0.19	0.027	1.01053e-253
Rab33a	LGS:RPC vs Mouse:RPC	2	1.30679e-257	0.656452	0.123	0.006	1.75529e-253
Plekho1	LGS:RPC vs Mouse:RPC	1	3.4435e-257	1.03673	0.378	0.135	4.62531e-253
Txndc12	LGS:RPC vs Mouse:RPC	5	4.32428e-257	-0.994831	0.013	0.21	5.80837e-253
Skp2	LGS:RPC vs Mouse:RPC	6	1.86527e-256	-1.07861	0.026	0.234	2.50544e-252
Mob1a	LGS:RPC vs Mouse:RPC	1	1.94248e-256	0.905788	0.258	0.058	2.60914e-252
Ctsf	LGS:RPC vs Mouse:RPC	3	1.87297e-255	1.03472	0.264	0.062	2.51577e-251
Pdlim5	LGS:RPC vs Mouse:RPC	2	2.13686e-255	0.952431	0.273	0.066	2.87024e-251
Ppp1ca	LGS:RPC vs Mouse:RPC	6	6.16867e-255	-0.835222	0.432	0.681	8.28576e-251
SCOC	LGS:RPC vs Mouse:RPC	5	7.50041e-255	-0.905778	0.001	0.167	1.00746e-250
BCAT1	LGS:RPC vs Mouse:RPC	5	8.8252e-255	-0.93942	0.002	0.173	1.1854e-250
Nsmce2	LGS:RPC vs Mouse:RPC	5	1.12641e-254	-1.07612	0.061	0.298	1.513e-250
Idh2	LGS:RPC vs Mouse:RPC	1	5.94398e-254	0.962277	0.523	0.28	7.98395e-250
SNX5	LGS:RPC vs Mouse:RPC	5	8.83802e-254	-0.950045	0.002	0.173	1.18712e-249
Luc7l3	LGS:RPC vs Mouse:RPC	2	3.0948e-253	0.90626	0.629	0.399	4.15694e-249
Zc3h12c	LGS:RPC vs Mouse:RPC	1	3.82511e-253	0.838726	0.184	0.026	5.13789e-249
CLIC4-containing	LGS:RPC vs Mouse:RPC	6	1.214e-252	-0.919569	0	0.165	1.63065e-248
Hmx1	LGS:RPC vs Mouse:RPC	1	1.45848e-252	1.06085	0.386	0.154	1.95903e-248
Gar1	LGS:RPC vs Mouse:RPC	6	4.58129e-252	-1.0785	0.137	0.394	6.15359e-248
ZRSR2-containing	LGS:RPC vs Mouse:RPC	5	7.46392e-252	-1.02437	0.016	0.214	1.00255e-247
Sox8	LGS:RPC vs Mouse:RPC	6	8.78103e-252	-1.11942	0.02	0.219	1.17947e-247
Slc25a5	LGS:RPC vs Mouse:RPC	5	2.67881e-251	-1.03642	0.231	0.503	3.59818e-247
NDUFB4	LGS:RPC vs Mouse:RPC	5	9.88133e-251	-0.965232	0	0.161	1.32726e-246
Tcf19	LGS:RPC vs Mouse:RPC	6	1.37574e-250	-1.08728	0.007	0.188	1.84789e-246
Gng2	LGS:RPC vs Mouse:RPC	1	3.24837e-250	0.972664	0.206	0.036	4.36322e-246
Rnh1	LGS:RPC vs Mouse:RPC	2	4.69628e-250	0.985095	0.365	0.126	6.30805e-246
Ncoa4	LGS:RPC vs Mouse:RPC	2	6.74616e-250	0.572355	0.097	0.002	9.06145e-246
CYCS	LGS:RPC vs Mouse:RPC	5	1.13845e-249	-0.890174	0	0.16	1.52916e-245
Uxt	LGS:RPC vs Mouse:RPC	1	2.12305e-249	1.02078	0.339	0.112	2.85168e-245
Akap9	LGS:RPC vs Mouse:RPC	2	2.26406e-249	1.00356	0.478	0.236	3.04108e-245
Wdr66	LGS:RPC vs Mouse:RPC	5	2.45446e-249	-0.964296	0.001	0.168	3.29683e-245
ANKRD46	LGS:RPC vs Mouse:RPC	5	4.18933e-249	-0.880532	0	0.16	5.62711e-245
Mrpl15	LGS:RPC vs Mouse:RPC	5	4.28827e-249	-1.01268	0.02	0.22	5.76e-245
Zfand6	LGS:RPC vs Mouse:RPC	5	4.89114e-249	-1.04525	0.171	0.434	6.56977e-245
Sin3b	LGS:RPC vs Mouse:RPC	5	1.02963e-248	-1.09375	0.09	0.328	1.38299e-244
Psmb5	LGS:RPC vs Mouse:RPC	2	1.34269e-248	0.919634	0.563	0.327	1.8035e-244
Pkig	LGS:RPC vs Mouse:RPC	5	1.61616e-247	-1.0173	0.15	0.413	2.17082e-243
Zbtb18	LGS:RPC vs Mouse:RPC	2	6.00726e-247	1.03674	0.303	0.087	8.06895e-243
Svbp	LGS:RPC vs Mouse:RPC	1	1.09539e-246	0.994189	0.495	0.253	1.47132e-242
TNFAIP1-like	LGS:RPC vs Mouse:RPC	5	1.24511e-246	-0.875858	0	0.159	1.67243e-242
Ndufa13	LGS:RPC vs Mouse:RPC	2	3.70504e-246	0.773434	0.723	0.54	4.97661e-242
Lingo3	LGS:RPC vs Mouse:RPC	3	4.31134e-246	0.653056	0.104	0.003	5.791e-242
LEO1-containing	LGS:RPC vs Mouse:RPC	5	8.48366e-246	-0.879384	0.001	0.162	1.13953e-241
NIPA2-like	LGS:RPC vs Mouse:RPC	5	8.25442e-244	-0.886624	0	0.157	1.10873e-239
Tmprss5	LGS:RPC vs Mouse:RPC	1	4.09702e-243	0.731983	0.129	0.009	5.50312e-239
Fam167a	LGS:RPC vs Mouse:RPC	2	5.58935e-243	0.712895	0.147	0.014	7.50762e-239
Kif2a	LGS:RPC vs Mouse:RPC	2	9.54344e-243	0.988101	0.39	0.15	1.28187e-238
Mrps21	LGS:RPC vs Mouse:RPC	2	2.42432e-242	0.993923	0.404	0.161	3.25635e-238
Bcl7c	LGS:RPC vs Mouse:RPC	2	4.57035e-242	0.952881	0.295	0.085	6.13889e-238
Ccna1	LGS:RPC vs Mouse:RPC	1	5.83988e-242	0.765071	0.133	0.011	7.84412e-238
Cdkl2	LGS:RPC vs Mouse:RPC	2	9.54012e-242	0.522721	0.086	0.001	1.28143e-237
Slc51a	LGS:RPC vs Mouse:RPC	2	3.76473e-241	0.490552	0.075	0	5.05679e-237
Gnpnat1	LGS:RPC vs Mouse:RPC	2	3.92085e-241	0.769561	0.2	0.034	5.26649e-237
RSRP1-containing	LGS:RPC vs Mouse:RPC	7	7.20702e-241	-1.09688	0.126	0.368	9.68047e-237
Nfe2l1	LGS:RPC vs Mouse:RPC	2	7.61834e-241	1.00881	0.231	0.052	1.0233e-236
Col18a1	LGS:RPC vs Mouse:RPC	1	7.6437e-241	0.875971	0.234	0.05	1.0267e-236
Immp1l	LGS:RPC vs Mouse:RPC	5	9.8552e-241	-1.01754	0.148	0.404	1.32375e-236
Tmem14c	LGS:RPC vs Mouse:RPC	1	1.90595e-240	0.973464	0.484	0.23	2.56007e-236
Tmem256	LGS:RPC vs Mouse:RPC	5	1.98286e-240	-0.986935	0.256	0.509	2.66338e-236
Maged1	LGS:RPC vs Mouse:RPC	5	2.37038e-240	-1.00061	0.206	0.465	3.1839e-236
Lmnb1	LGS:RPC vs Mouse:RPC	6	8.58833e-240	-0.854708	0.449	0.683	1.15358e-235
Fignl1	LGS:RPC vs Mouse:RPC	6	1.24147e-239	-1.05712	0.045	0.256	1.66755e-235
Srbd1	LGS:RPC vs Mouse:RPC	1	4.82556e-239	0.93748	0.245	0.057	6.4817e-235
Pcp4	LGS:RPC vs Mouse:RPC	2	1.43655e-238	0.74452	0.102	0.004	1.92957e-234
Eif3k	LGS:RPC vs Mouse:RPC	2	1.69085e-238	0.707206	0.777	0.614	2.27116e-234
Col9a3	LGS:RPC vs Mouse:RPC	6	2.44515e-238	-1.03088	0.019	0.212	3.28432e-234
Anxa5	LGS:RPC vs Mouse:RPC	1	8.19613e-238	0.897878	0.251	0.059	1.1009e-233
NAA20-containing	LGS:RPC vs Mouse:RPC	5	1.17473e-237	-0.918052	0.006	0.177	1.57789e-233
Acsl3	LGS:RPC vs Mouse:RPC	8	1.32002e-237	-0.999658	0.329	0.586	1.77305e-233
FOXN3-containing	LGS:RPC vs Mouse:RPC	5	2.07149e-237	-0.882265	0	0.153	2.78243e-233
Vkorc1l1	LGS:RPC vs Mouse:RPC	1	2.91092e-237	0.796048	0.205	0.037	3.90994e-233
Nes	LGS:RPC vs Mouse:RPC	8	5.12065e-237	1.05974	0.361	0.139	6.87806e-233
Pcbp2	LGS:RPC vs Mouse:RPC	5	5.94229e-237	-0.796535	0.467	0.703	7.98168e-233
Rhof	LGS:RPC vs Mouse:RPC	2	1.02311e-236	0.560155	0.083	0.001	1.37425e-232
Ddx18	LGS:RPC vs Mouse:RPC	1	1.20111e-236	0.998666	0.466	0.216	1.61333e-232
Fibp	LGS:RPC vs Mouse:RPC	2	1.09737e-235	0.964656	0.353	0.124	1.47399e-231
Hspa8	LGS:RPC vs Mouse:RPC	1	1.44523e-235	0.686652	0.792	0.519	1.94123e-231
Cyr61	LGS:RPC vs Mouse:RPC	6	1.87441e-235	-1.51503	0.112	0.339	2.51771e-231
Zkscan7	LGS:RPC vs Mouse:RPC	2	2.90054e-235	0.537295	0.095	0.003	3.896e-231
Mxra8	LGS:RPC vs Mouse:RPC	2	2.96274e-235	0.688396	0.121	0.008	3.97956e-231
Dpysl2	LGS:RPC vs Mouse:RPC	5	3.72242e-235	-1.12935	0.059	0.28	4.99995e-231
Crabp2	LGS:RPC vs Mouse:RPC	6	7.40585e-235	-0.951866	0.004	0.167	9.94753e-231
Nrm	LGS:RPC vs Mouse:RPC	6	1.67437e-234	-1.0813	0.091	0.32	2.24902e-230
Dtl	LGS:RPC vs Mouse:RPC	6	2.23111e-234	-1.12363	0.044	0.253	2.99683e-230
Tbca	LGS:RPC vs Mouse:RPC	1	3.5423e-234	0.783075	0.674	0.502	4.75802e-230
S100a4	LGS:RPC vs Mouse:RPC	1	5.64376e-234	0.496522	0.076	0	7.5807e-230
Ccdc107	LGS:RPC vs Mouse:RPC	3	1.37163e-233	0.976621	0.36	0.133	1.84238e-229
CCNT2	LGS:RPC vs Mouse:RPC	5	2.23258e-233	-0.923399	0.005	0.171	2.9988e-229
Slc1a3	LGS:RPC vs Mouse:RPC	8	5.67781e-233	-0.938253	0.34	0.594	7.62644e-229
Rapgef2	LGS:RPC vs Mouse:RPC	1	2.49623e-232	0.793648	0.155	0.019	3.35294e-228
Rad51	LGS:RPC vs Mouse:RPC	6	3.32146e-232	-0.885137	0.002	0.16	4.46139e-228
Chka	LGS:RPC vs Mouse:RPC	5	4.18407e-232	-1.02012	0.031	0.229	5.62005e-228
Fan1	LGS:RPC vs Mouse:RPC	1	1.16899e-231	0.751364	0.161	0.021	1.57018e-227
Aurkb	LGS:RPC vs Mouse:RPC	8	2.53422e-231	-1.09114	0.07	0.271	3.40396e-227
Ndufa12	LGS:RPC vs Mouse:RPC	5	2.66127e-231	-1.05888	0.04	0.25	3.57461e-227
TPM1-like	LGS:RPC vs Mouse:RPC	5	3.75828e-231	-0.995083	0.023	0.215	5.04812e-227
GATAD2B-like	LGS:RPC vs Mouse:RPC	5	2.72014e-230	-0.952929	0.012	0.187	3.65369e-226
Nr2f1	LGS:RPC vs Mouse:RPC	6	4.20572e-229	-1.02702	0.033	0.232	5.64913e-225
Ccdc66	LGS:RPC vs Mouse:RPC	2	5.44462e-229	0.934137	0.26	0.067	7.31322e-225
Oaz1	LGS:RPC vs Mouse:RPC	3	6.28766e-229	0.630854	0.82	0.691	8.44558e-225
COX20-like	LGS:RPC vs Mouse:RPC	1	8.74728e-229	0.826972	0.607	0.395	1.17493e-224
Nol4	LGS:RPC vs Mouse:RPC	2	1.80827e-228	0.859304	0.212	0.042	2.42887e-224
Nudt12	LGS:RPC vs Mouse:RPC	2	1.45488e-227	0.547726	0.097	0.003	1.95419e-223
Hdgf	LGS:RPC vs Mouse:RPC	6	2.86431e-227	-0.887848	0.383	0.605	3.84734e-223
Arid5b	LGS:RPC vs Mouse:RPC	1	4.42601e-227	1.09321	0.347	0.136	5.94502e-223
Igfbp4	LGS:RPC vs Mouse:RPC	6	1.35175e-226	-1.02381	0.071	0.289	1.81567e-222
Gpalpp1	LGS:RPC vs Mouse:RPC	1	2.36033e-226	0.852478	0.235	0.053	3.1704e-222
Syne2	LGS:RPC vs Mouse:RPC	2	2.6576e-226	0.983364	0.359	0.134	3.56969e-222
Emp2	LGS:RPC vs Mouse:RPC	1	1.11729e-225	0.80031	0.164	0.023	1.50074e-221
Sp3	LGS:RPC vs Mouse:RPC	2	2.80193e-225	0.90254	0.336	0.113	3.76356e-221
Smc5	LGS:RPC vs Mouse:RPC	1	4.45532e-225	0.951548	0.35	0.125	5.98438e-221
Col11a1	LGS:RPC vs Mouse:RPC	1	6.00653e-225	0.807246	0.163	0.023	8.06797e-221
Tmem176b	LGS:RPC vs Mouse:RPC	5	2.31305e-224	-0.965974	0.019	0.204	3.10689e-220
Lsm2	LGS:RPC vs Mouse:RPC	6	1.01363e-223	-0.932967	0.246	0.492	1.3615e-219
Srsf12	LGS:RPC vs Mouse:RPC	2	1.06829e-223	0.507957	0.091	0.002	1.43492e-219
Anks1b	LGS:RPC vs Mouse:RPC	2	6.61867e-223	0.665648	0.091	0.003	8.8902e-219
Elovl2	LGS:RPC vs Mouse:RPC	3	6.6644e-223	0.638367	0.131	0.012	8.95162e-219
TMEM183A-like	LGS:RPC vs Mouse:RPC	5	7.9725e-223	-0.811605	0	0.147	1.07087e-218
Shmt2	LGS:RPC vs Mouse:RPC	6	1.46811e-222	-1.01907	0.101	0.336	1.97197e-218
Dnhd1	LGS:RPC vs Mouse:RPC	2	2.2615e-222	0.493381	0.083	0.001	3.03764e-218
ATP6V1A	LGS:RPC vs Mouse:RPC	5	2.75601e-222	-0.830648	0	0.147	3.70187e-218
Arhgap42	LGS:RPC vs Mouse:RPC	1	6.20643e-222	0.749913	0.15	0.018	8.33647e-218
Cetn3	LGS:RPC vs Mouse:RPC	6	1.49542e-221	-0.875988	0.297	0.546	2.00865e-217
Sox12	LGS:RPC vs Mouse:RPC	2	2.2546e-221	0.860404	0.212	0.044	3.02838e-217
Tspan17	LGS:RPC vs Mouse:RPC	3	1.38072e-220	0.67589	0.131	0.012	1.85459e-216
Apip	LGS:RPC vs Mouse:RPC	2	1.42405e-220	0.954623	0.32	0.107	1.91278e-216
Bdp1	LGS:RPC vs Mouse:RPC	2	1.68469e-220	0.925048	0.283	0.083	2.26287e-216
LIN7C	LGS:RPC vs Mouse:RPC	5	1.71484e-220	-0.818423	0	0.145	2.30338e-216
Kit	LGS:RPC vs Mouse:RPC	1	5.83179e-220	0.846515	0.214	0.045	7.83327e-216
Hsf2bp	LGS:RPC vs Mouse:RPC	1	3.26114e-219	0.433001	0.076	0.001	4.38036e-215
Mrps28	LGS:RPC vs Mouse:RPC	5	3.38741e-219	-0.956237	0.021	0.204	4.54997e-215
MRPL45	LGS:RPC vs Mouse:RPC	5	3.48639e-219	-0.837188	0.002	0.151	4.68293e-215
Dph3	LGS:RPC vs Mouse:RPC	5	3.78078e-219	-1.00243	0.065	0.279	5.07835e-215
Khdrbs1	LGS:RPC vs Mouse:RPC	1	8.26675e-219	0.83276	0.558	0.369	1.11039e-214
Kat6b	LGS:RPC vs Mouse:RPC	2	1.6196e-218	0.889876	0.241	0.059	2.17545e-214
Gpr37	LGS:RPC vs Mouse:RPC	6	3.05761e-218	-1.0106	0.018	0.195	4.10699e-214
FDFT1-like	LGS:RPC vs Mouse:RPC	5	3.1266e-218	-0.789334	0	0.141	4.19965e-214
Lrrtm2	LGS:RPC vs Mouse:RPC	2	4.99559e-218	0.523613	0.09	0.003	6.71007e-214
UBA3-containing	LGS:RPC vs Mouse:RPC	5	1.16058e-217	-0.8171	0	0.144	1.55889e-213
TAF13-containing	LGS:RPC vs Mouse:RPC	5	1.31435e-217	-0.801174	0	0.141	1.76543e-213
Dkc1	LGS:RPC vs Mouse:RPC	6	2.5578e-217	-0.991202	0.051	0.26	3.43564e-213
G3bp1	LGS:RPC vs Mouse:RPC	6	4.81431e-217	-0.811974	0.384	0.611	6.46658e-213
CRNDE-like	LGS:RPC vs Mouse:RPC	1	8.8079e-217	0.79591	0.195	0.037	1.18308e-212
Plp2	LGS:RPC vs Mouse:RPC	1	8.65541e-216	0.841945	0.204	0.042	1.16259e-211
Cdkn3	LGS:RPC vs Mouse:RPC	1	1.16878e-215	1.03332	0.284	0.106	1.5699e-211
Fbxl14	LGS:RPC vs Mouse:RPC	1	1.88502e-215	0.796063	0.186	0.034	2.53196e-211
MDM2-like	LGS:RPC vs Mouse:RPC	5	2.53056e-215	-0.800544	0	0.14	3.39904e-211
TBPL1	LGS:RPC vs Mouse:RPC	5	3.34365e-215	-0.794789	0	0.142	4.49119e-211
Plpp2	LGS:RPC vs Mouse:RPC	2	4.44923e-215	0.684216	0.133	0.013	5.9762e-211
Rrp1	LGS:RPC vs Mouse:RPC	5	4.95607e-215	-0.988185	0.106	0.338	6.657e-211
Tmem50b	LGS:RPC vs Mouse:RPC	1	5.85523e-215	0.806192	0.193	0.036	7.86474e-211
Akirin1	LGS:RPC vs Mouse:RPC	2	1.75709e-214	0.908191	0.348	0.127	2.36013e-210
Smarca1	LGS:RPC vs Mouse:RPC	2	7.4711e-214	0.733485	0.158	0.022	1.00352e-209
Ppp2cb	LGS:RPC vs Mouse:RPC	1	2.5613e-213	0.814455	0.193	0.037	3.44034e-209
Mbd3	LGS:RPC vs Mouse:RPC	5	3.4111e-213	-0.912231	0.204	0.45	4.58179e-209
Srsf7	LGS:RPC vs Mouse:RPC	6	4.14146e-213	-0.700676	0.532	0.751	5.56281e-209
Cnn3	LGS:RPC vs Mouse:RPC	8	7.98323e-213	0.626974	0.789	0.677	1.07231e-208
Smu1	LGS:RPC vs Mouse:RPC	5	8.67715e-213	-0.98291	0.094	0.313	1.16552e-208
Dhcr7	LGS:RPC vs Mouse:RPC	5	1.48175e-212	-0.80563	0.001	0.14	1.99028e-208
Mis18a	LGS:RPC vs Mouse:RPC	6	2.84023e-211	-0.929478	0.03	0.21	3.815e-207
Eno1	LGS:RPC vs Mouse:RPC	1	1.47474e-210	0.67692	0.894	0.688	1.98087e-206
HNRNPA1-like	LGS:RPC vs Mouse:RPC	5	6.15868e-210	-0.75592	0	0.136	8.27234e-206
NHS	LGS:RPC vs Mouse:RPC	6	7.75086e-210	-0.856977	0.003	0.15	1.0411e-205
Cuedc1	LGS:RPC vs Mouse:RPC	5	1.32713e-209	-0.887488	0.013	0.179	1.78259e-205
Pik3r3	LGS:RPC vs Mouse:RPC	2	2.3256e-209	0.652608	0.129	0.013	3.12374e-205
HSPA13-like	LGS:RPC vs Mouse:RPC	5	2.39417e-209	-0.785848	0.001	0.14	3.21585e-205
Cep295	LGS:RPC vs Mouse:RPC	1	5.80069e-209	0.946808	0.342	0.132	7.79148e-205
Fam174a	LGS:RPC vs Mouse:RPC	5	9.61618e-209	-0.890259	0.012	0.177	1.29165e-204
DLGAP2-containing	LGS:RPC vs Mouse:RPC	1	4.95996e-208	0.367346	0.069	0	6.66222e-204
TCEAL8	LGS:RPC vs Mouse:RPC	5	7.55042e-208	-0.880007	0.134	0.381	1.01417e-203
Gsr	LGS:RPC vs Mouse:RPC	6	8.93548e-208	-0.994275	0.064	0.266	1.20021e-203
SLU7	LGS:RPC vs Mouse:RPC	5	3.71227e-207	-0.863265	0.008	0.164	4.98632e-203
Incenp	LGS:RPC vs Mouse:RPC	6	1.17634e-206	-1.00135	0.064	0.253	1.58007e-202
Lig1	LGS:RPC vs Mouse:RPC	6	1.59484e-206	-1.1333	0.179	0.39	2.14218e-202
Larp1	LGS:RPC vs Mouse:RPC	2	2.19618e-206	0.793196	0.189	0.037	2.94991e-202
CD164	LGS:RPC vs Mouse:RPC	5	2.33089e-206	-0.813241	0.002	0.145	3.13085e-202
Scarb1	LGS:RPC vs Mouse:RPC	7	1.10841e-205	-0.942645	0.037	0.225	1.48881e-201
Maged2	LGS:RPC vs Mouse:RPC	2	4.48696e-205	0.927396	0.299	0.102	6.02688e-201
Atxn3	LGS:RPC vs Mouse:RPC	2	4.8459e-205	0.765694	0.182	0.034	6.50901e-201
Rab11a	LGS:RPC vs Mouse:RPC	5	3.1549e-204	-0.944962	0.153	0.384	4.23766e-200
Mthfd2l	LGS:RPC vs Mouse:RPC	5	5.39142e-204	-0.901308	0.01	0.168	7.24176e-200
Gtf3c6	LGS:RPC vs Mouse:RPC	1	9.24191e-204	0.902283	0.362	0.14	1.24137e-199
Apba2	LGS:RPC vs Mouse:RPC	5	1.11473e-203	-0.986285	0.046	0.24	1.4973e-199
Hnrnpm	LGS:RPC vs Mouse:RPC	1	1.22793e-203	0.688213	0.72	0.593	1.64935e-199
Mapt	LGS:RPC vs Mouse:RPC	2	2.11925e-203	0.826631	0.153	0.023	2.84658e-199
Zbtb41	LGS:RPC vs Mouse:RPC	2	6.42117e-203	0.690929	0.158	0.024	8.62491e-199
Ddx52	LGS:RPC vs Mouse:RPC	5	6.60782e-203	-0.821708	0.005	0.154	8.87562e-199
Rtn3	LGS:RPC vs Mouse:RPC	1	1.90755e-202	0.701804	0.656	0.505	2.56223e-198
Nt5dc2	LGS:RPC vs Mouse:RPC	6	2.53947e-202	-0.875539	0.248	0.48	3.41101e-198
ELOVL5	LGS:RPC vs Mouse:RPC	6	3.09558e-202	-0.767231	0	0.132	4.15798e-198
Maz	LGS:RPC vs Mouse:RPC	1	3.68227e-201	0.871737	0.517	0.308	4.94602e-197
AMD1	LGS:RPC vs Mouse:RPC	5	3.87058e-201	-0.754128	0	0.131	5.19897e-197
Fam161a	LGS:RPC vs Mouse:RPC	3	5.047e-201	0.712612	0.15	0.021	6.77913e-197
DPM1-containing	LGS:RPC vs Mouse:RPC	5	1.36773e-200	-0.761326	0	0.131	1.83714e-196
UQCRB-like	LGS:RPC vs Mouse:RPC	5	4.45733e-200	-0.672051	0.544	0.747	5.98708e-196
Glo1	LGS:RPC vs Mouse:RPC	7	6.78984e-200	0.755907	0.638	0.443	9.12012e-196
Akt1	LGS:RPC vs Mouse:RPC	1	1.29828e-199	0.897186	0.273	0.087	1.74385e-195
Fanci	LGS:RPC vs Mouse:RPC	1	1.29966e-199	0.615008	0.129	0.014	1.74571e-195
Polr1c	LGS:RPC vs Mouse:RPC	5	1.70485e-199	-0.880509	0.027	0.205	2.28995e-195
NKIRAS2-containing	LGS:RPC vs Mouse:RPC	5	4.39146e-199	-0.730824	0	0.13	5.89861e-195
CYB5R3-like	LGS:RPC vs Mouse:RPC	1	5.67329e-199	0.911424	0.342	0.129	7.62036e-195
Ccdc17	LGS:RPC vs Mouse:RPC	2	7.48313e-199	0.443143	0.076	0.001	1.00513e-194
GOT2-containing	LGS:RPC vs Mouse:RPC	5	9.65639e-199	-0.743468	0	0.13	1.29705e-194
Col2a1	LGS:RPC vs Mouse:RPC	8	1.90009e-198	0.941533	0.377	0.156	2.5522e-194
STOX2-like	LGS:RPC vs Mouse:RPC	5	2.12297e-198	-0.750779	0	0.129	2.85157e-194
Fam103a1	LGS:RPC vs Mouse:RPC	2	2.27826e-198	0.860869	0.297	0.098	3.06016e-194
Gpr161	LGS:RPC vs Mouse:RPC	2	2.58118e-198	0.477557	0.083	0.002	3.46705e-194
Nrbp2	LGS:RPC vs Mouse:RPC	2	3.96681e-198	0.793687	0.179	0.034	5.32822e-194
Per2	LGS:RPC vs Mouse:RPC	1	4.18134e-198	0.532009	0.094	0.005	5.61637e-194
March5	LGS:RPC vs Mouse:RPC	5	9.27205e-198	-0.948916	0.068	0.272	1.24542e-193
Emp3	LGS:RPC vs Mouse:RPC	1	1.24292e-197	0.616099	0.129	0.015	1.66949e-193
Mapk1ip1l	LGS:RPC vs Mouse:RPC	1	1.76646e-197	0.7769	0.209	0.048	2.37271e-193
Rpl36a	LGS:RPC vs Mouse:RPC	4	1.79796e-197	-0.54665	0.796	0.909	2.41502e-193
Eif2ak1	LGS:RPC vs Mouse:RPC	1	2.91304e-197	0.789785	0.219	0.053	3.91279e-193
C1d	LGS:RPC vs Mouse:RPC	5	7.18001e-197	-0.88992	0.221	0.446	9.64418e-193
Nsmce4a	LGS:RPC vs Mouse:RPC	6	8.7941e-197	-0.867805	0.26	0.492	1.18122e-192
Akr1a1	LGS:RPC vs Mouse:RPC	5	1.36566e-196	-0.90967	0.195	0.434	1.83435e-192
Atn1	LGS:RPC vs Mouse:RPC	2	2.50597e-196	0.690452	0.154	0.024	3.36601e-192
Fdx1	LGS:RPC vs Mouse:RPC	1	3.57357e-196	0.886337	0.367	0.147	4.80003e-192
POU3F2	LGS:RPC vs Mouse:RPC	6	6.13801e-196	-0.763056	0	0.128	8.24458e-192
Dvl1	LGS:RPC vs Mouse:RPC	2	4.06522e-195	0.602902	0.118	0.011	5.4604e-191
Igf2bp1	LGS:RPC vs Mouse:RPC	6	1.84784e-194	-0.863957	0.017	0.177	2.48201e-190
Ccser2	LGS:RPC vs Mouse:RPC	2	3.2423e-194	0.729914	0.175	0.033	4.35506e-190
Aif1l	LGS:RPC vs Mouse:RPC	8	3.5484e-194	0.869163	0.304	0.104	4.76621e-190
Haghl	LGS:RPC vs Mouse:RPC	5	4.49584e-194	-0.827441	0.007	0.152	6.03881e-190
Tmem60	LGS:RPC vs Mouse:RPC	5	1.42285e-193	-0.921406	0.05	0.235	1.91117e-189
CDC25B-like	LGS:RPC vs Mouse:RPC	6	2.40753e-193	-0.733722	0	0.126	3.2338e-189
Nr2f6	LGS:RPC vs Mouse:RPC	1	3.5096e-193	0.85565	0.272	0.086	4.71409e-189
Dhx29	LGS:RPC vs Mouse:RPC	2	5.21034e-193	0.792031	0.205	0.047	6.99852e-189
Fosb	LGS:RPC vs Mouse:RPC	6	6.32705e-193	-1.0951	0.047	0.237	8.49849e-189
Neil3	LGS:RPC vs Mouse:RPC	6	1.24186e-192	-0.958819	0.036	0.214	1.66807e-188
Tnks	LGS:RPC vs Mouse:RPC	2	1.70104e-192	0.693587	0.156	0.025	2.28483e-188
Leprotl1	LGS:RPC vs Mouse:RPC	2	2.10339e-192	0.886012	0.301	0.104	2.82527e-188
Faap20	LGS:RPC vs Mouse:RPC	1	2.59293e-192	0.909239	0.345	0.141	3.48282e-188
Taf6l	LGS:RPC vs Mouse:RPC	5	3.06725e-192	-0.795332	0.006	0.148	4.11993e-188
PGRMC2	LGS:RPC vs Mouse:RPC	5	7.66649e-192	-0.732673	0	0.128	1.02976e-187
CWC25	LGS:RPC vs Mouse:RPC	5	1.04076e-191	-0.740035	0	0.125	1.39795e-187
Pdf	LGS:RPC vs Mouse:RPC	2	1.23555e-191	0.372502	0.066	0	1.6596e-187
Clta	LGS:RPC vs Mouse:RPC	2	4.95919e-191	0.67143	0.681	0.525	6.66119e-187
Lrrc75b	LGS:RPC vs Mouse:RPC	1	7.21851e-191	0.673467	0.143	0.02	9.6959e-187
Fam49a	LGS:RPC vs Mouse:RPC	2	8.31475e-191	0.648351	0.123	0.013	1.11684e-186
Dapl1	LGS:RPC vs Mouse:RPC	8	1.01842e-190	0.454522	0.892	0.901	1.36794e-186
Mrpl4	LGS:RPC vs Mouse:RPC	5	1.09352e-190	-0.726857	0	0.125	1.46882e-186
Crip2	LGS:RPC vs Mouse:RPC	6	1.3915e-190	-0.903729	0.194	0.408	1.86906e-186
Bcl10	LGS:RPC vs Mouse:RPC	5	2.00383e-190	-0.810773	0.011	0.16	2.69154e-186
Pdcl	LGS:RPC vs Mouse:RPC	5	1.43976e-189	-0.849024	0.015	0.171	1.93388e-185
Stmn3	LGS:RPC vs Mouse:RPC	3	1.12231e-188	0.851303	0.204	0.049	1.50748e-184
CEBPB	LGS:RPC vs Mouse:RPC	1	1.23533e-188	0.796282	0.147	0.023	1.65929e-184
Lnx1	LGS:RPC vs Mouse:RPC	2	1.61122e-188	0.435934	0.066	0.001	2.16419e-184
AIDA	LGS:RPC vs Mouse:RPC	5	2.40219e-188	-0.70924	0	0.126	3.22663e-184
Fam171b	LGS:RPC vs Mouse:RPC	5	2.60301e-188	-0.839834	0.011	0.158	3.49637e-184
Ube2q2	LGS:RPC vs Mouse:RPC	2	5.38155e-188	0.815144	0.218	0.056	7.2285e-184
Plekhh1	LGS:RPC vs Mouse:RPC	2	5.59764e-188	0.499253	0.088	0.004	7.51875e-184
Nono	LGS:RPC vs Mouse:RPC	1	8.14935e-188	0.755242	0.599	0.405	1.09462e-183
SYNJ2BP-like	LGS:RPC vs Mouse:RPC	5	1.60186e-187	-0.759777	0.003	0.136	2.15162e-183
FARSB-like	LGS:RPC vs Mouse:RPC	5	2.04094e-187	-0.714621	0.001	0.127	2.74139e-183
Tbx3	LGS:RPC vs Mouse:RPC	1	3.23336e-187	0.955997	0.349	0.143	4.34305e-183
Tmem70	LGS:RPC vs Mouse:RPC	5	4.86232e-187	-0.763418	0.004	0.139	6.53107e-183
Mmp14	LGS:RPC vs Mouse:RPC	6	5.14869e-187	-0.880616	0.022	0.184	6.91573e-183
Sf3b6	LGS:RPC vs Mouse:RPC	6	5.47105e-187	-0.792479	0.344	0.564	7.34871e-183
Mttp	LGS:RPC vs Mouse:RPC	5	1.79372e-186	-0.760213	0	0.122	2.40933e-182
Cnot1	LGS:RPC vs Mouse:RPC	2	2.33861e-186	0.860828	0.261	0.082	3.14122e-182
RBM4B	LGS:RPC vs Mouse:RPC	5	2.42245e-186	-0.923102	0.061	0.249	3.25383e-182
Eif3h	LGS:RPC vs Mouse:RPC	5	3.13245e-186	-0.65312	0.535	0.734	4.20751e-182
Mat2a	LGS:RPC vs Mouse:RPC	5	3.18005e-186	-0.915314	0.198	0.419	4.27144e-182
Smad4	LGS:RPC vs Mouse:RPC	2	9.31943e-186	0.823335	0.26	0.079	1.25179e-181
Kansl2	LGS:RPC vs Mouse:RPC	2	1.23805e-185	0.534684	0.101	0.008	1.66295e-181
Atox1	LGS:RPC vs Mouse:RPC	2	1.98222e-185	0.81929	0.544	0.339	2.66251e-181
ELFN1	LGS:RPC vs Mouse:RPC	7	3.02595e-185	0.400057	0.068	0.001	4.06445e-181
Fjx1	LGS:RPC vs Mouse:RPC	8	3.66782e-185	0.887066	0.352	0.141	4.92661e-181
Cspg5	LGS:RPC vs Mouse:RPC	5	4.10656e-185	-0.849355	0.255	0.489	5.51594e-181
Atf7ip2	LGS:RPC vs Mouse:RPC	1	5.66959e-185	0.416516	0.066	0.001	7.6154e-181
Ccdc90b	LGS:RPC vs Mouse:RPC	5	9.17343e-185	-0.817479	0.015	0.169	1.23217e-180
Vps51	LGS:RPC vs Mouse:RPC	2	1.30471e-184	0.669287	0.131	0.017	1.75249e-180
Syce2	LGS:RPC vs Mouse:RPC	6	1.42395e-184	-0.739684	0	0.121	1.91264e-180
Nxf1	LGS:RPC vs Mouse:RPC	5	1.56996e-184	-0.935554	0.082	0.275	2.10878e-180
Kcnh7	LGS:RPC vs Mouse:RPC	1	2.41717e-184	0.500177	0.082	0.003	3.24674e-180
Sdhaf4	LGS:RPC vs Mouse:RPC	5	3.53948e-184	-0.787892	0.007	0.146	4.75423e-180
Irx5	LGS:RPC vs Mouse:RPC	6	4.02836e-184	-0.991903	0.115	0.324	5.41089e-180
Egr1	LGS:RPC vs Mouse:RPC	4	5.04766e-184	-0.928356	0.315	0.526	6.78002e-180
Cdca7	LGS:RPC vs Mouse:RPC	6	1.49991e-183	-0.989654	0.089	0.284	2.01468e-179
Ndufa6	LGS:RPC vs Mouse:RPC	5	1.64187e-183	-0.861889	0.231	0.458	2.20536e-179
PHACTR1	LGS:RPC vs Mouse:RPC	5	1.84122e-183	-0.765588	0.001	0.124	2.47312e-179
Mtrf1l	LGS:RPC vs Mouse:RPC	2	2.95276e-183	0.7394	0.185	0.04	3.96615e-179
Cd207	LGS:RPC vs Mouse:RPC	1	3.02086e-183	0.364152	0.058	0	4.05762e-179
Mycl	LGS:RPC vs Mouse:RPC	5	4.53755e-183	-0.899063	0.019	0.174	6.09483e-179
Thrsp	LGS:RPC vs Mouse:RPC	1	7.14504e-183	0.403675	0.06	0	9.59722e-179
Ttc37	LGS:RPC vs Mouse:RPC	2	7.84629e-183	0.583799	0.119	0.013	1.05391e-178
Ass1	LGS:RPC vs Mouse:RPC	6	1.15548e-182	-0.997374	0.038	0.205	1.55204e-178
Cenpj	LGS:RPC vs Mouse:RPC	1	1.7628e-182	0.693774	0.18	0.038	2.36779e-178
Mlec	LGS:RPC vs Mouse:RPC	1	2.42022e-182	0.878197	0.306	0.113	3.25084e-178
Crcp	LGS:RPC vs Mouse:RPC	2	8.54957e-182	0.839717	0.285	0.098	1.14838e-177
Slc8a1	LGS:RPC vs Mouse:RPC	2	1.00686e-181	0.436032	0.068	0.001	1.35242e-177
Cul3	LGS:RPC vs Mouse:RPC	2	1.4023e-181	0.76697	0.247	0.073	1.88356e-177
Suco	LGS:RPC vs Mouse:RPC	1	1.5555e-181	0.805413	0.222	0.06	2.08934e-177
Shprh	LGS:RPC vs Mouse:RPC	2	4.32936e-181	0.784209	0.2	0.048	5.81519e-177
Ccdc15	LGS:RPC vs Mouse:RPC	1	6.99712e-181	0.745821	0.173	0.035	9.39854e-177
Dctn6	LGS:RPC vs Mouse:RPC	2	7.56979e-181	0.793274	0.23	0.064	1.01677e-176
Ptn	LGS:RPC vs Mouse:RPC	6	1.09534e-180	-0.85805	0.321	0.56	1.47125e-176
Dusp1	LGS:RPC vs Mouse:RPC	6	1.43373e-180	-1.10458	0.174	0.374	1.92579e-176
Nusap1	LGS:RPC vs Mouse:RPC	8	1.59258e-180	0.886504	0.417	0.374	2.13916e-176
Lrrfip2	LGS:RPC vs Mouse:RPC	2	2.85929e-180	0.846295	0.248	0.076	3.8406e-176
Znrf2	LGS:RPC vs Mouse:RPC	2	3.07641e-180	0.653933	0.149	0.025	4.13224e-176
Paox	LGS:RPC vs Mouse:RPC	2	4.60653e-180	0.555764	0.108	0.01	6.18749e-176
Rlbp1	LGS:RPC vs Mouse:RPC	1	6.57288e-180	0.861167	0.456	0.223	8.82869e-176
Fhl1	LGS:RPC vs Mouse:RPC	6	9.66547e-180	-0.885485	0.133	0.349	1.29827e-175
Lsm8	LGS:RPC vs Mouse:RPC	1	3.4452e-179	0.707207	0.532	0.393	4.62759e-175
Sgta	LGS:RPC vs Mouse:RPC	5	5.34885e-179	-0.886038	0.092	0.294	7.18457e-175
Styx	LGS:RPC vs Mouse:RPC	2	6.61576e-179	0.39978	0.071	0.002	8.88629e-175
Tmem243	LGS:RPC vs Mouse:RPC	7	6.69059e-179	-0.907352	0.039	0.204	8.98681e-175
Pbxip1	LGS:RPC vs Mouse:RPC	6	7.26005e-179	-0.864884	0.017	0.17	9.7517e-175
MAX	LGS:RPC vs Mouse:RPC	5	2.39348e-178	-0.676309	0	0.117	3.21493e-174
Iah1	LGS:RPC vs Mouse:RPC	2	5.05315e-178	0.78737	0.234	0.067	6.7874e-174
Tigd2	LGS:RPC vs Mouse:RPC	5	6.13399e-178	-0.855694	0.017	0.167	8.23917e-174
Mbd2	LGS:RPC vs Mouse:RPC	1	6.99695e-178	0.608061	0.152	0.027	9.3983e-174
Lpin2	LGS:RPC vs Mouse:RPC	2	7.06713e-178	0.797183	0.23	0.066	9.49257e-174
Polh	LGS:RPC vs Mouse:RPC	2	9.05982e-178	0.433533	0.081	0.003	1.21692e-173
Haus6	LGS:RPC vs Mouse:RPC	1	1.05464e-177	0.705679	0.19	0.044	1.4166e-173
Apool	LGS:RPC vs Mouse:RPC	5	1.16532e-177	-0.856774	0.026	0.184	1.56526e-173
Slc6a1	LGS:RPC vs Mouse:RPC	6	2.10284e-177	-0.850728	0.012	0.157	2.82454e-173
Bcas2	LGS:RPC vs Mouse:RPC	6	2.13232e-177	-0.778938	0.289	0.508	2.86414e-173
Phc2	LGS:RPC vs Mouse:RPC	2	2.20037e-177	0.843668	0.24	0.074	2.95553e-173
Slc25a17	LGS:RPC vs Mouse:RPC	5	3.35343e-177	-0.823152	0.019	0.173	4.50433e-173
Klhdc3	LGS:RPC vs Mouse:RPC	2	4.4944e-177	0.810957	0.252	0.078	6.03688e-173
Kmt2c	LGS:RPC vs Mouse:RPC	2	7.91857e-177	0.820298	0.269	0.089	1.06362e-172
Adamts19	LGS:RPC vs Mouse:RPC	1	1.58803e-176	0.619642	0.091	0.006	2.13304e-172
Ckap5	LGS:RPC vs Mouse:RPC	1	2.06616e-176	0.901465	0.35	0.175	2.77526e-172
TRPM3-like	LGS:RPC vs Mouse:RPC	6	2.53318e-176	-0.686958	0	0.116	3.40257e-172
Dcps	LGS:RPC vs Mouse:RPC	5	1.32928e-175	-0.87819	0.078	0.266	1.78549e-171
Atp9b	LGS:RPC vs Mouse:RPC	2	4.56627e-175	0.571968	0.118	0.014	6.13342e-171
Dctn1	LGS:RPC vs Mouse:RPC	3	6.07168e-175	0.671819	0.147	0.025	8.15548e-171
PPP3R1-like	LGS:RPC vs Mouse:RPC	5	7.27705e-175	-0.72738	0.004	0.132	9.77454e-171
Mrpl9	LGS:RPC vs Mouse:RPC	2	8.00525e-175	0.81832	0.292	0.104	1.07527e-170
Ubac1	LGS:RPC vs Mouse:RPC	2	1.59975e-174	0.790832	0.244	0.074	2.14878e-170
Bard1	LGS:RPC vs Mouse:RPC	1	1.74757e-174	0.754195	0.192	0.046	2.34734e-170
Vgll4	LGS:RPC vs Mouse:RPC	6	2.00672e-174	-0.927793	0.096	0.293	2.69543e-170
ABCG2-like	LGS:RPC vs Mouse:RPC	6	9.21276e-174	-0.697294	0	0.114	1.23746e-169
RANBP2-like	LGS:RPC vs Mouse:RPC	2	9.2999e-174	0.701502	0.187	0.043	1.24916e-169
ZCRB1-containing	LGS:RPC vs Mouse:RPC	5	1.01111e-173	-0.873996	0.153	0.368	1.35813e-169
CYBA-like	LGS:RPC vs Mouse:RPC	1	1.01542e-173	0.81816	0.282	0.098	1.36391e-169
Rfc1	LGS:RPC vs Mouse:RPC	1	1.04113e-173	0.870036	0.484	0.284	1.39844e-169
Fxr1	LGS:RPC vs Mouse:RPC	1	1.74802e-173	0.935636	0.362	0.171	2.34794e-169
Cnp	LGS:RPC vs Mouse:RPC	6	1.87245e-173	-0.994204	0.096	0.288	2.51508e-169
Oser1	LGS:RPC vs Mouse:RPC	2	1.87403e-173	0.455945	0.09	0.006	2.5172e-169
Sgcb	LGS:RPC vs Mouse:RPC	1	6.54809e-173	0.697092	0.181	0.04	8.79539e-169
Ergic3	LGS:RPC vs Mouse:RPC	5	7.19105e-173	-0.864182	0.097	0.3	9.65902e-169
GPN1-like	LGS:RPC vs Mouse:RPC	5	9.41958e-173	-0.65418	0	0.113	1.26524e-168
ZC3HC1	LGS:RPC vs Mouse:RPC	5	1.36114e-172	-0.73073	0.004	0.13	1.82829e-168
Gna12	LGS:RPC vs Mouse:RPC	1	3.41638e-172	0.695199	0.166	0.034	4.58889e-168
Nudt2	LGS:RPC vs Mouse:RPC	1	4.10124e-172	0.832729	0.297	0.11	5.50879e-168
GTF2F2	LGS:RPC vs Mouse:RPC	5	5.17624e-172	-0.660516	0	0.113	6.95273e-168
Hnrnph3	LGS:RPC vs Mouse:RPC	1	5.50256e-172	0.764379	0.535	0.347	7.39104e-168
Mex3a	LGS:RPC vs Mouse:RPC	5	7.01375e-172	-0.75672	0.008	0.14	9.42087e-168
GLRX5-containing	LGS:RPC vs Mouse:RPC	1	8.07378e-172	0.809802	0.48	0.271	1.08447e-167
Stt3a	LGS:RPC vs Mouse:RPC	6	8.72664e-172	-0.862993	0.049	0.215	1.17216e-167
Tnrc6b	LGS:RPC vs Mouse:RPC	3	9.31432e-172	0.901827	0.365	0.165	1.2511e-167
Hes5	LGS:RPC vs Mouse:RPC	6	9.58954e-172	-0.824139	0.698	0.837	1.28807e-167
Lars	LGS:RPC vs Mouse:RPC	1	1.2929e-171	0.863203	0.381	0.177	1.73663e-167
Tdrkh	LGS:RPC vs Mouse:RPC	5	2.58351e-171	-0.770643	0.013	0.153	3.47017e-167
Flywch1	LGS:RPC vs Mouse:RPC	5	5.64024e-171	-0.759237	0.01	0.147	7.57598e-167
Naa10	LGS:RPC vs Mouse:RPC	1	8.03982e-171	0.852181	0.386	0.18	1.07991e-166
Wipi1	LGS:RPC vs Mouse:RPC	5	2.34015e-170	-0.88221	0.043	0.214	3.14328e-166
SMIM15-containing	LGS:RPC vs Mouse:RPC	6	2.34308e-170	-0.845469	0.042	0.213	3.14722e-166
Cdv3	LGS:RPC vs Mouse:RPC	1	4.22891e-170	0.811397	0.483	0.273	5.68027e-166
PHF21A	LGS:RPC vs Mouse:RPC	5	4.60446e-170	-0.657006	0	0.112	6.18471e-166
Notch4	LGS:RPC vs Mouse:RPC	1	8.13342e-170	0.804012	0.239	0.072	1.09248e-165
Eef2	LGS:RPC vs Mouse:RPC	5	9.29258e-170	-0.492648	0.74	0.861	1.24818e-165
Cux1	LGS:RPC vs Mouse:RPC	6	1.10882e-169	-0.846759	0.179	0.395	1.48937e-165
Flna	LGS:RPC vs Mouse:RPC	1	1.34451e-169	0.794233	0.237	0.072	1.80595e-165
Nkain1	LGS:RPC vs Mouse:RPC	2	1.79051e-169	0.404932	0.064	0.001	2.40501e-165
Lyar	LGS:RPC vs Mouse:RPC	5	2.21422e-169	-0.852885	0.146	0.346	2.97415e-165
Morc4	LGS:RPC vs Mouse:RPC	1	2.75459e-169	0.575025	0.116	0.014	3.69997e-165
Slc29a4	LGS:RPC vs Mouse:RPC	2	3.32583e-169	0.541292	0.089	0.006	4.46725e-165
Fscn1	LGS:RPC vs Mouse:RPC	4	9.6552e-169	-0.685343	0.443	0.653	1.29689e-164
Tead2	LGS:RPC vs Mouse:RPC	6	1.37325e-168	-0.850882	0.147	0.359	1.84454e-164
Smarcc1	LGS:RPC vs Mouse:RPC	6	2.00225e-168	-0.834667	0.221	0.43	2.68943e-164
Ccdc175	LGS:RPC vs Mouse:RPC	7	3.22731e-168	0.401306	0.06	0.001	4.33492e-164
Usp46	LGS:RPC vs Mouse:RPC	2	3.979e-168	0.707113	0.167	0.035	5.3446e-164
HDAC5	LGS:RPC vs Mouse:RPC	5	4.07268e-168	-0.653898	0	0.11	5.47042e-164
Esd	LGS:RPC vs Mouse:RPC	1	7.96703e-168	0.69145	0.599	0.424	1.07013e-163
Slc35e3	LGS:RPC vs Mouse:RPC	2	1.42895e-167	0.555404	0.109	0.012	1.91937e-163
Cep135	LGS:RPC vs Mouse:RPC	1	2.81912e-167	0.665158	0.16	0.032	3.78664e-163
Coprs	LGS:RPC vs Mouse:RPC	2	4.28919e-167	0.763723	0.23	0.069	5.76123e-163
Efna2	LGS:RPC vs Mouse:RPC	1	5.03511e-167	0.77158	0.23	0.069	6.76316e-163
Eif2b1	LGS:RPC vs Mouse:RPC	5	1.13617e-166	-0.742732	0.008	0.137	1.5261e-162
Mterf4	LGS:RPC vs Mouse:RPC	2	1.48293e-166	0.758537	0.216	0.061	1.99187e-162
UBE2I	LGS:RPC vs Mouse:RPC	5	1.54419e-166	-0.692974	0.001	0.116	2.07415e-162
Dhx30	LGS:RPC vs Mouse:RPC	5	2.24941e-166	-0.886842	0.07	0.248	3.02141e-162
Rwdd2a	LGS:RPC vs Mouse:RPC	2	2.25845e-166	0.518097	0.095	0.008	3.03355e-162
Prpf6	LGS:RPC vs Mouse:RPC	2	3.14859e-166	0.843086	0.297	0.113	4.22919e-162
Mrpl11	LGS:RPC vs Mouse:RPC	5	3.42787e-166	-0.857125	0.064	0.248	4.60432e-162
Gkap1	LGS:RPC vs Mouse:RPC	1	6.27442e-166	0.821451	0.429	0.224	8.4278e-162
SUCLG2-like	LGS:RPC vs Mouse:RPC	6	6.66347e-166	-0.704479	0.005	0.131	8.95037e-162
ORC4	LGS:RPC vs Mouse:RPC	5	7.84113e-166	-0.647585	0	0.112	1.05322e-161
Ier5	LGS:RPC vs Mouse:RPC	6	1.12448e-165	-0.899489	0.162	0.361	1.5104e-161
Aes	LGS:RPC vs Mouse:RPC	2	1.13117e-165	0.800752	0.496	0.299	1.51939e-161
Rexo1	LGS:RPC vs Mouse:RPC	5	2.54421e-165	-0.81384	0.03	0.187	3.41738e-161
Dpp8	LGS:RPC vs Mouse:RPC	1	4.59669e-165	0.683627	0.174	0.039	6.17427e-161
Crkl	LGS:RPC vs Mouse:RPC	1	4.7513e-165	0.425365	0.081	0.004	6.38195e-161
Nup153	LGS:RPC vs Mouse:RPC	2	1.04732e-164	0.539088	0.125	0.018	1.40675e-160
Dusp5	LGS:RPC vs Mouse:RPC	5	1.34866e-164	-0.746965	0.003	0.121	1.81151e-160
Trip12	LGS:RPC vs Mouse:RPC	2	1.40691e-164	0.731045	0.229	0.068	1.88976e-160
Larp7	LGS:RPC vs Mouse:RPC	1	3.3873e-164	0.813062	0.485	0.298	4.54982e-160
Pkia	LGS:RPC vs Mouse:RPC	2	3.7444e-164	0.827228	0.234	0.073	5.02948e-160
RNF168	LGS:RPC vs Mouse:RPC	6	9.21018e-164	-0.662272	0	0.108	1.23711e-159
Tmem107	LGS:RPC vs Mouse:RPC	6	1.02421e-163	-0.874577	0.08	0.264	1.37572e-159
Park7	LGS:RPC vs Mouse:RPC	2	1.36473e-163	0.543778	0.773	0.676	1.8331e-159
PHB	LGS:RPC vs Mouse:RPC	5	2.32056e-163	-0.639558	0	0.107	3.11697e-159
Sh3bp1	LGS:RPC vs Mouse:RPC	5	2.43598e-163	-0.711413	0.005	0.128	3.27201e-159
Cdon	LGS:RPC vs Mouse:RPC	1	2.4667e-163	1.00195	0.242	0.087	3.31327e-159
Lnpep	LGS:RPC vs Mouse:RPC	2	3.1293e-163	0.413874	0.083	0.005	4.20328e-159
Tia1	LGS:RPC vs Mouse:RPC	5	7.99453e-163	-0.792878	0.277	0.486	1.07383e-158
Emc10	LGS:RPC vs Mouse:RPC	6	8.80545e-163	-0.847769	0.129	0.333	1.18275e-158
Pfdn6	LGS:RPC vs Mouse:RPC	6	9.04958e-163	-0.769984	0.231	0.449	1.21554e-158
Il6st	LGS:RPC vs Mouse:RPC	2	2.91643e-162	0.630395	0.129	0.02	3.91735e-158
Rsph1	LGS:RPC vs Mouse:RPC	6	1.18659e-161	-0.83401	0.016	0.154	1.59383e-157
Tnfaip8	LGS:RPC vs Mouse:RPC	6	1.35891e-161	-0.830763	0.035	0.191	1.82528e-157
Ddr1	LGS:RPC vs Mouse:RPC	1	1.4703e-161	0.816616	0.387	0.184	1.97491e-157
Scamp4	LGS:RPC vs Mouse:RPC	2	1.7878e-161	0.359463	0.052	0	2.40138e-157
Nptn	LGS:RPC vs Mouse:RPC	2	1.85955e-161	0.704576	0.208	0.058	2.49775e-157
TBRG1-like	LGS:RPC vs Mouse:RPC	5	2.02556e-161	-0.871028	0.097	0.281	2.72073e-157
Orc6	LGS:RPC vs Mouse:RPC	6	2.29404e-161	-0.87548	0.099	0.273	3.08136e-157
Epha3	LGS:RPC vs Mouse:RPC	6	2.33299e-161	-0.675925	0.001	0.114	3.13367e-157
IST1-containing	LGS:RPC vs Mouse:RPC	5	3.72401e-161	-0.628617	0	0.106	5.0021e-157
Hook3	LGS:RPC vs Mouse:RPC	2	7.08462e-161	0.771605	0.228	0.07	9.51607e-157
Krit1	LGS:RPC vs Mouse:RPC	5	8.46089e-161	-0.884209	0.076	0.251	1.13647e-156
SUMO2-like	LGS:RPC vs Mouse:RPC	2	9.32438e-161	0.416938	0.08	0.005	1.25245e-156
METTL16	LGS:RPC vs Mouse:RPC	5	9.36824e-161	-0.614127	0	0.106	1.25834e-156
Paip1	LGS:RPC vs Mouse:RPC	2	1.30507e-160	0.800369	0.355	0.155	1.75297e-156
Chchd4	LGS:RPC vs Mouse:RPC	5	2.78194e-160	-0.652818	0.001	0.113	3.73671e-156
CYC1-like	LGS:RPC vs Mouse:RPC	2	3.69795e-160	0.727027	0.558	0.379	4.96708e-156
Mmab	LGS:RPC vs Mouse:RPC	1	4.42609e-160	0.66039	0.162	0.035	5.94512e-156
Bbs12	LGS:RPC vs Mouse:RPC	2	7.14638e-160	0.577893	0.13	0.021	9.59902e-156
Irs2	LGS:RPC vs Mouse:RPC	1	7.42042e-160	0.624	0.148	0.028	9.96711e-156
Csnk1g2	LGS:RPC vs Mouse:RPC	1	1.0183e-159	0.797083	0.246	0.083	1.36778e-155
Hpca	LGS:RPC vs Mouse:RPC	2	2.28472e-159	0.452245	0.066	0.002	3.06884e-155
Rragb	LGS:RPC vs Mouse:RPC	2	3.2429e-159	0.544007	0.112	0.014	4.35587e-155
Msh6	LGS:RPC vs Mouse:RPC	1	4.7366e-159	0.785549	0.245	0.08	6.3622e-155
Golga7	LGS:RPC vs Mouse:RPC	1	4.85256e-159	0.787625	0.303	0.12	6.51796e-155
Pdcd5	LGS:RPC vs Mouse:RPC	1	1.0256e-158	0.689881	0.591	0.413	1.37759e-154
KCTD20	LGS:RPC vs Mouse:RPC	5	1.09651e-158	-0.610371	0	0.105	1.47283e-154
Hdac9	LGS:RPC vs Mouse:RPC	2	1.26114e-158	0.418789	0.077	0.004	1.69396e-154
Sez6	LGS:RPC vs Mouse:RPC	3	1.3845e-158	0.393251	0.066	0.002	1.85966e-154
Vps54	LGS:RPC vs Mouse:RPC	2	1.85188e-158	0.535226	0.113	0.015	2.48745e-154
SPCS3-like	LGS:RPC vs Mouse:RPC	5	5.08898e-158	-0.627466	0	0.104	6.83551e-154
IFITM2-like	LGS:RPC vs Mouse:RPC	6	6.01685e-158	-0.655558	0	0.107	8.08183e-154
Pcbp1	LGS:RPC vs Mouse:RPC	1	8.57498e-158	0.626288	0.664	0.512	1.15179e-153
Eif3d	LGS:RPC vs Mouse:RPC	1	8.85286e-158	0.764872	0.505	0.316	1.18912e-153
Myo10	LGS:RPC vs Mouse:RPC	3	1.08638e-157	0.644099	0.127	0.02	1.45922e-153
Tmem59l	LGS:RPC vs Mouse:RPC	2	1.13413e-157	0.388197	0.059	0.001	1.52336e-153
Ywhab	LGS:RPC vs Mouse:RPC	2	1.23018e-157	0.713426	0.594	0.41	1.65237e-153
Anapc11	LGS:RPC vs Mouse:RPC	1	1.58661e-157	0.631425	0.612	0.478	2.13114e-153
Cfdp1	LGS:RPC vs Mouse:RPC	1	2.05132e-157	0.757845	0.517	0.349	2.75533e-153
Hp1bp3	LGS:RPC vs Mouse:RPC	2	2.65999e-157	0.739415	0.53	0.338	3.5729e-153
Ifnar1	LGS:RPC vs Mouse:RPC	1	4.92229e-157	0.690428	0.21	0.06	6.61163e-153
Polr3gl	LGS:RPC vs Mouse:RPC	3	4.95946e-157	0.732599	0.277	0.1	6.66154e-153
Gcat	LGS:RPC vs Mouse:RPC	6	1.25769e-156	-0.703517	0.01	0.137	1.68933e-152
CYB5A-containing	LGS:RPC vs Mouse:RPC	1	2.0981e-156	0.746304	0.507	0.316	2.81817e-152
Trmt10c	LGS:RPC vs Mouse:RPC	1	3.1864e-156	0.767459	0.282	0.104	4.27998e-152
Malt1	LGS:RPC vs Mouse:RPC	2	3.74892e-156	0.394466	0.071	0.003	5.03554e-152
Arglu1	LGS:RPC vs Mouse:RPC	2	4.09307e-156	0.750422	0.562	0.38	5.49782e-152
Fat1	LGS:RPC vs Mouse:RPC	1	4.13124e-156	0.829469	0.328	0.144	5.54908e-152
Ppp1r11	LGS:RPC vs Mouse:RPC	5	4.36354e-156	-0.810177	0.082	0.269	5.86111e-152
NFS1-containing	LGS:RPC vs Mouse:RPC	5	5.06715e-156	-0.6196	0	0.103	6.80619e-152
E2f5	LGS:RPC vs Mouse:RPC	1	6.06904e-156	0.787965	0.279	0.106	8.15194e-152
Pbk	LGS:RPC vs Mouse:RPC	8	6.40932e-156	-0.930967	0.226	0.416	8.609e-152
Tmem50a	LGS:RPC vs Mouse:RPC	3	7.47702e-156	0.801031	0.468	0.269	1.00431e-151
Tyw3	LGS:RPC vs Mouse:RPC	2	9.94255e-156	0.628771	0.15	0.03	1.33548e-151
ZBTB12	LGS:RPC vs Mouse:RPC	5	2.12841e-155	-0.671641	0.007	0.128	2.85888e-151
Zfc3h1	LGS:RPC vs Mouse:RPC	2	3.76784e-155	0.695551	0.162	0.036	5.06096e-151
Mrps12	LGS:RPC vs Mouse:RPC	5	4.05355e-155	-0.82317	0.083	0.253	5.44472e-151
MRFAP1	LGS:RPC vs Mouse:RPC	5	9.42429e-155	-0.68485	0.482	0.657	1.26587e-150
Dbndd2	LGS:RPC vs Mouse:RPC	3	2.11106e-154	0.486357	0.078	0.005	2.83557e-150
Trib2	LGS:RPC vs Mouse:RPC	7	4.61676e-154	0.843956	0.361	0.172	6.20123e-150
Rps6ka5	LGS:RPC vs Mouse:RPC	1	1.02932e-153	0.498999	0.098	0.01	1.38259e-149
Nek6	LGS:RPC vs Mouse:RPC	1	1.04077e-153	0.612925	0.122	0.019	1.39796e-149
Cadm1	LGS:RPC vs Mouse:RPC	5	2.10704e-153	-0.659494	0.48	0.673	2.83018e-149
Ptk2	LGS:RPC vs Mouse:RPC	2	3.32371e-153	0.660773	0.171	0.04	4.46441e-149
Ndufb9	LGS:RPC vs Mouse:RPC	7	3.65362e-153	-0.677611	0.355	0.562	4.90755e-149
Cep350	LGS:RPC vs Mouse:RPC	2	4.83651e-153	0.621345	0.161	0.036	6.4964e-149
Krtcap2	LGS:RPC vs Mouse:RPC	1	7.03333e-153	0.657062	0.62	0.464	9.44716e-149
Psma7	LGS:RPC vs Mouse:RPC	1	1.00861e-152	0.519128	0.773	0.709	1.35477e-148
MTFR1	LGS:RPC vs Mouse:RPC	5	1.06967e-152	-0.600908	0	0.101	1.43678e-148
Ptpro	LGS:RPC vs Mouse:RPC	2	1.2372e-152	0.43205	0.068	0.003	1.6618e-148
Ppt2	LGS:RPC vs Mouse:RPC	5	5.80733e-152	-0.744014	0.019	0.154	7.8004e-148
B3galt2	LGS:RPC vs Mouse:RPC	2	8.32653e-152	0.351509	0.063	0.002	1.11842e-147
Atp5a1	LGS:RPC vs Mouse:RPC	5	1.27212e-151	-0.598508	0.497	0.687	1.70871e-147
Nfu1	LGS:RPC vs Mouse:RPC	5	1.49842e-151	-0.715635	0.012	0.14	2.01268e-147
Jakmip2	LGS:RPC vs Mouse:RPC	1	1.90628e-151	0.584715	0.125	0.02	2.56051e-147
Tom1	LGS:RPC vs Mouse:RPC	2	5.59533e-151	0.353201	0.056	0.001	7.51564e-147
Npc2	LGS:RPC vs Mouse:RPC	6	8.54506e-151	-0.774543	0.235	0.436	1.14777e-146
Faxc	LGS:RPC vs Mouse:RPC	2	1.43191e-150	0.442132	0.083	0.006	1.92335e-146
SREBF2	LGS:RPC vs Mouse:RPC	5	4.82722e-150	-0.580487	0	0.099	6.48392e-146
Mxra7	LGS:RPC vs Mouse:RPC	3	7.34648e-150	-0.833878	0.099	0.278	9.86779e-146
Epb41	LGS:RPC vs Mouse:RPC	2	8.58134e-150	0.777334	0.28	0.107	1.15265e-145
Gpc3	LGS:RPC vs Mouse:RPC	6	2.93028e-149	-0.692725	0.008	0.128	3.93595e-145
Dcbld2	LGS:RPC vs Mouse:RPC	1	3.1746e-149	0.523813	0.127	0.022	4.26412e-145
Hjurp	LGS:RPC vs Mouse:RPC	6	3.73659e-149	-0.802531	0.053	0.205	5.01899e-145
FXN-like	LGS:RPC vs Mouse:RPC	5	6.43999e-149	-0.729192	0.016	0.144	8.6502e-145
DEGS1	LGS:RPC vs Mouse:RPC	5	8.76927e-149	-0.598498	0	0.098	1.17789e-144
Atp5g1	LGS:RPC vs Mouse:RPC	3	2.23297e-148	0.644054	0.651	0.487	2.99933e-144
Lin7b	LGS:RPC vs Mouse:RPC	2	3.30456e-148	0.374045	0.056	0.001	4.43869e-144
Btbd3	LGS:RPC vs Mouse:RPC	2	3.51421e-148	0.560854	0.107	0.014	4.72028e-144
Gamt	LGS:RPC vs Mouse:RPC	7	7.02208e-148	0.645253	0.141	0.028	9.43206e-144
Imp3	LGS:RPC vs Mouse:RPC	5	8.36465e-148	-0.772071	0.05	0.213	1.12354e-143
DSTN	LGS:RPC vs Mouse:RPC	5	8.62119e-148	-0.630443	0.001	0.104	1.158e-143
Ppp1r14a	LGS:RPC vs Mouse:RPC	3	2.2815e-147	0.54847	0.079	0.006	3.06451e-143
Vegfb	LGS:RPC vs Mouse:RPC	1	3.15789e-147	0.783013	0.262	0.099	4.24167e-143
Slc39a1	LGS:RPC vs Mouse:RPC	1	4.40432e-147	0.678273	0.315	0.132	5.91588e-143
Atf7ip	LGS:RPC vs Mouse:RPC	3	7.42588e-147	0.805493	0.323	0.144	9.97444e-143
Tmem131	LGS:RPC vs Mouse:RPC	2	9.5718e-147	0.56094	0.115	0.017	1.28568e-142
Fkbp4	LGS:RPC vs Mouse:RPC	6	1.05551e-146	-0.674695	0.33	0.542	1.41775e-142
BIRC2-like	LGS:RPC vs Mouse:RPC	5	1.56254e-146	-0.581358	0	0.097	2.0988e-142
Ebna1bp2	LGS:RPC vs Mouse:RPC	5	2.13189e-146	-0.799906	0.122	0.302	2.86356e-142
CCDC43-containing	LGS:RPC vs Mouse:RPC	5	2.20083e-146	-0.632645	0.003	0.11	2.95615e-142
Ino80	LGS:RPC vs Mouse:RPC	2	3.84418e-146	0.636683	0.159	0.037	5.1635e-142
PGK1	LGS:RPC vs Mouse:RPC	6	1.45513e-145	-0.568081	0.001	0.099	1.95453e-141
Yae1d1	LGS:RPC vs Mouse:RPC	2	1.90863e-145	0.495938	0.102	0.013	2.56367e-141
Hey1	LGS:RPC vs Mouse:RPC	8	2.11062e-145	0.885664	0.271	0.115	2.83499e-141
RASA2	LGS:RPC vs Mouse:RPC	5	2.42181e-145	-0.57454	0	0.096	3.25298e-141
Jun	LGS:RPC vs Mouse:RPC	6	2.61406e-145	-0.721101	0.584	0.72	3.51121e-141
Sap30	LGS:RPC vs Mouse:RPC	1	2.943e-145	0.746512	0.433	0.258	3.95304e-141
Fam104a	LGS:RPC vs Mouse:RPC	5	4.33979e-145	-0.77285	0.179	0.371	5.82921e-141
Trib1	LGS:RPC vs Mouse:RPC	5	1.13297e-144	-0.622552	0.002	0.105	1.52181e-140
Gsk3b	LGS:RPC vs Mouse:RPC	5	1.13664e-144	-0.762374	0.262	0.455	1.52674e-140
Nde1	LGS:RPC vs Mouse:RPC	6	1.19694e-144	-0.836475	0.086	0.252	1.60773e-140
Slc24a5	LGS:RPC vs Mouse:RPC	5	1.74485e-144	-0.837169	0.039	0.182	2.34368e-140
Polr2d	LGS:RPC vs Mouse:RPC	1	1.80023e-144	0.762431	0.411	0.214	2.41806e-140
Guk1	LGS:RPC vs Mouse:RPC	3	1.84786e-144	0.768316	0.298	0.121	2.48204e-140
Ralb	LGS:RPC vs Mouse:RPC	1	3.55062e-144	0.680039	0.194	0.056	4.7692e-140
Rassf4	LGS:RPC vs Mouse:RPC	4	8.46499e-144	0.79082	0.192	0.056	1.13702e-139
Sssca1	LGS:RPC vs Mouse:RPC	5	1.47722e-143	-0.764271	0.047	0.204	1.9842e-139
Hgh1	LGS:RPC vs Mouse:RPC	2	1.54593e-143	0.611681	0.143	0.03	2.0765e-139
Rab12	LGS:RPC vs Mouse:RPC	1	2.29796e-143	0.652238	0.194	0.056	3.08661e-139
Sfxn1	LGS:RPC vs Mouse:RPC	6	2.46436e-143	-0.834514	0.095	0.267	3.31013e-139
Clstn1	LGS:RPC vs Mouse:RPC	3	2.58179e-143	0.744984	0.257	0.095	3.46786e-139
Fam20b	LGS:RPC vs Mouse:RPC	2	2.82513e-143	0.604111	0.143	0.03	3.79471e-139
Nudt9	LGS:RPC vs Mouse:RPC	5	2.97259e-143	-0.753696	0.032	0.174	3.99278e-139
Rfc2	LGS:RPC vs Mouse:RPC	6	3.03904e-143	-0.816754	0.149	0.328	4.08204e-139
Mfge8	LGS:RPC vs Mouse:RPC	6	4.13459e-143	-0.821514	0.07	0.239	5.55358e-139
Ddrgk1	LGS:RPC vs Mouse:RPC	5	4.82204e-143	-0.794588	0.044	0.193	6.47696e-139
Mcm4	LGS:RPC vs Mouse:RPC	8	7.08811e-143	-0.861375	0.089	0.249	9.52076e-139
UBE2QL1-containing	LGS:RPC vs Mouse:RPC	2	7.09036e-143	0.404714	0.066	0.003	9.52377e-139
Ttpa	LGS:RPC vs Mouse:RPC	1	8.26682e-143	0.36808	0.05	0	1.1104e-138
Cers6	LGS:RPC vs Mouse:RPC	1	9.82194e-143	0.603827	0.126	0.023	1.31928e-138
ID4-containing	LGS:RPC vs Mouse:RPC	6	1.06169e-142	-0.598687	0	0.094	1.42607e-138
Cdhr1	LGS:RPC vs Mouse:RPC	3	1.1635e-142	0.434359	0.066	0.003	1.56281e-138
Xpo1	LGS:RPC vs Mouse:RPC	1	1.20109e-142	0.749225	0.306	0.128	1.6133e-138
Hddc3	LGS:RPC vs Mouse:RPC	5	1.45821e-142	-0.797617	0.055	0.209	1.95867e-138
Zmynd11	LGS:RPC vs Mouse:RPC	1	1.55771e-142	0.779549	0.375	0.187	2.09232e-138
Hypk	LGS:RPC vs Mouse:RPC	3	2.07418e-142	0.769779	0.433	0.243	2.78604e-138
Ppp6r2	LGS:RPC vs Mouse:RPC	2	2.39737e-142	0.408998	0.073	0.005	3.22015e-138
Chic1	LGS:RPC vs Mouse:RPC	2	2.50564e-142	0.60823	0.128	0.023	3.36557e-138
Msi2	LGS:RPC vs Mouse:RPC	1	3.44057e-142	0.739753	0.497	0.307	4.62137e-138
Nap1l3	LGS:RPC vs Mouse:RPC	1	4.11301e-142	0.652016	0.173	0.045	5.52459e-138
Ppip5k2	LGS:RPC vs Mouse:RPC	2	4.67588e-142	0.520591	0.132	0.025	6.28064e-138
Atad5	LGS:RPC vs Mouse:RPC	1	5.5715e-142	0.722424	0.23	0.077	7.48364e-138
Nom1	LGS:RPC vs Mouse:RPC	5	6.13209e-142	-0.654586	0.007	0.121	8.23662e-138
Tbx2	LGS:RPC vs Mouse:RPC	1	1.08113e-141	0.775353	0.273	0.107	1.45218e-137
Col23a1	LGS:RPC vs Mouse:RPC	6	1.43275e-141	-0.677811	0.012	0.132	1.92447e-137
Brca2	LGS:RPC vs Mouse:RPC	8	1.89994e-141	0.795946	0.245	0.088	2.552e-137
Srsf4	LGS:RPC vs Mouse:RPC	1	2.46327e-141	0.742813	0.476	0.292	3.30867e-137
Sar1b	LGS:RPC vs Mouse:RPC	5	3.40005e-141	-0.76444	0.097	0.275	4.56694e-137
Mdh1	LGS:RPC vs Mouse:RPC	5	4.18412e-141	-0.623759	0.437	0.624	5.62011e-137
Osbpl8	LGS:RPC vs Mouse:RPC	2	4.99292e-141	0.525107	0.129	0.024	6.70649e-137
Nrbf2	LGS:RPC vs Mouse:RPC	2	6.41211e-141	0.580606	0.125	0.022	8.61274e-137
Pde10a	LGS:RPC vs Mouse:RPC	6	1.04e-140	-0.602019	0.002	0.102	1.39692e-136
Peak1	LGS:RPC vs Mouse:RPC	8	1.11364e-140	0.737063	0.216	0.069	1.49584e-136
Slit1	LGS:RPC vs Mouse:RPC	1	1.28668e-140	0.352136	0.06	0.002	1.72827e-136
Ralgps2	LGS:RPC vs Mouse:RPC	3	1.39673e-140	-0.790755	0.085	0.253	1.87609e-136
ATXN2-containing	LGS:RPC vs Mouse:RPC	5	1.69289e-140	-0.589064	0.001	0.1	2.27389e-136
Mob3b	LGS:RPC vs Mouse:RPC	1	2.29757e-140	0.519294	0.108	0.016	3.08609e-136
Rgs10	LGS:RPC vs Mouse:RPC	1	4.20477e-140	0.434889	0.075	0.005	5.64785e-136
Ywhah	LGS:RPC vs Mouse:RPC	8	5.60789e-140	-0.699504	0.322	0.516	7.53251e-136
Fam122a	LGS:RPC vs Mouse:RPC	5	7.10856e-140	-0.704554	0.016	0.14	9.54822e-136
EXOSC8-like	LGS:RPC vs Mouse:RPC	6	9.82039e-140	-0.786177	0.116	0.29	1.31907e-135
HSPH1	LGS:RPC vs Mouse:RPC	5	1.08164e-139	-0.629582	0.005	0.112	1.45286e-135
Prkacb	LGS:RPC vs Mouse:RPC	1	1.32573e-139	0.676395	0.197	0.058	1.78072e-135
RSRC1-like	LGS:RPC vs Mouse:RPC	5	1.77e-139	-0.77672	0.057	0.205	2.37747e-135
Ctsh	LGS:RPC vs Mouse:RPC	1	2.40501e-139	0.551118	0.094	0.011	3.23041e-135
Ppm1h	LGS:RPC vs Mouse:RPC	5	3.03861e-139	-0.698652	0.009	0.122	4.08145e-135
Dnajc9	LGS:RPC vs Mouse:RPC	8	3.89846e-139	-0.701188	0.344	0.532	5.23642e-135
Crot	LGS:RPC vs Mouse:RPC	5	4.34499e-139	-0.78874	0.07	0.235	5.83618e-135
Arid1a	LGS:RPC vs Mouse:RPC	5	1.1842e-138	-0.789547	0.065	0.226	1.59062e-134
Agps	LGS:RPC vs Mouse:RPC	1	1.93119e-138	0.581552	0.158	0.038	2.59398e-134
Chchd5	LGS:RPC vs Mouse:RPC	2	2.44735e-138	0.751395	0.37	0.181	3.28728e-134
Mrps34	LGS:RPC vs Mouse:RPC	2	4.25952e-138	0.764321	0.301	0.127	5.72139e-134
UBE2F	LGS:RPC vs Mouse:RPC	5	4.42558e-138	-0.554785	0	0.094	5.94444e-134
Cfap43	LGS:RPC vs Mouse:RPC	1	4.73756e-138	0.623737	0.138	0.029	6.36349e-134
Hspa1a	LGS:RPC vs Mouse:RPC	2	5.62159e-138	0.403449	0.079	0.007	7.55091e-134
Fads2	LGS:RPC vs Mouse:RPC	1	1.04121e-137	0.586175	0.129	0.025	1.39856e-133
Smim10l1	LGS:RPC vs Mouse:RPC	2	1.20286e-137	0.781098	0.335	0.154	1.61569e-133
Wdr18	LGS:RPC vs Mouse:RPC	1	1.8497e-137	0.766955	0.344	0.162	2.48452e-133
Dixdc1	LGS:RPC vs Mouse:RPC	7	2.19851e-137	0.559957	0.141	0.031	2.95303e-133
Mpped2	LGS:RPC vs Mouse:RPC	2	2.3838e-137	0.751134	0.267	0.103	3.20192e-133
Spin4	LGS:RPC vs Mouse:RPC	1	2.7173e-137	0.454104	0.091	0.011	3.64987e-133
Ccdc18	LGS:RPC vs Mouse:RPC	1	5.62653e-137	0.702519	0.199	0.063	7.55755e-133
Lrp1	LGS:RPC vs Mouse:RPC	2	6.19575e-137	0.720667	0.171	0.046	8.32214e-133
Lrpprc	LGS:RPC vs Mouse:RPC	2	1.05694e-136	0.606943	0.138	0.029	1.41968e-132
Fopnl	LGS:RPC vs Mouse:RPC	5	1.38206e-136	-0.764308	0.049	0.191	1.85639e-132
Rbmx	LGS:RPC vs Mouse:RPC	1	1.68175e-136	0.685236	0.527	0.347	2.25893e-132
Cdk6	LGS:RPC vs Mouse:RPC	6	4.26109e-136	-0.851934	0.101	0.252	5.7235e-132
Proca1	LGS:RPC vs Mouse:RPC	2	4.42321e-136	0.445388	0.068	0.004	5.94125e-132
Bend5	LGS:RPC vs Mouse:RPC	2	6.72804e-136	0.62668	0.149	0.034	9.0371e-132
Gldc	LGS:RPC vs Mouse:RPC	6	6.86754e-136	-0.759892	0.08	0.249	9.22448e-132
Blmh	LGS:RPC vs Mouse:RPC	5	7.70788e-136	-0.735216	0.143	0.333	1.03532e-131
Fam20c	LGS:RPC vs Mouse:RPC	1	9.52971e-136	0.425442	0.078	0.007	1.28003e-131
Chid1	LGS:RPC vs Mouse:RPC	2	9.72389e-136	0.655339	0.16	0.04	1.30611e-131
Fdps	LGS:RPC vs Mouse:RPC	1	1.11398e-135	0.794022	0.369	0.189	1.49629e-131
Shc2	LGS:RPC vs Mouse:RPC	1	1.15864e-135	0.400451	0.066	0.003	1.55629e-131
Lrrtm1	LGS:RPC vs Mouse:RPC	6	2.80294e-135	-0.649259	0.004	0.106	3.76492e-131
Ugcg	LGS:RPC vs Mouse:RPC	1	3.20882e-135	0.588031	0.15	0.035	4.31009e-131
Camsap2	LGS:RPC vs Mouse:RPC	2	3.47736e-135	0.588192	0.152	0.036	4.67079e-131
Peg3	LGS:RPC vs Mouse:RPC	1	3.86725e-135	0.767552	0.379	0.193	5.19449e-131
ATP2C1	LGS:RPC vs Mouse:RPC	5	3.94748e-135	-0.548151	0	0.09	5.30226e-131
Zic5	LGS:RPC vs Mouse:RPC	5	6.09241e-135	-0.612356	0.002	0.099	8.18332e-131
Med28	LGS:RPC vs Mouse:RPC	5	9.26016e-135	-0.702078	0.241	0.434	1.24382e-130
Pdcd4	LGS:RPC vs Mouse:RPC	5	1.20988e-134	-0.781281	0.029	0.159	1.62511e-130
COX17-like	LGS:RPC vs Mouse:RPC	2	1.24064e-134	0.750433	0.442	0.255	1.66643e-130
Scamp5	LGS:RPC vs Mouse:RPC	3	1.27559e-134	0.490041	0.082	0.008	1.71337e-130
Acp1	LGS:RPC vs Mouse:RPC	1	1.30502e-134	0.67546	0.205	0.065	1.75291e-130
Sept4	LGS:RPC vs Mouse:RPC	7	1.44552e-134	-0.73748	0.02	0.147	1.94163e-130
Kcna2	LGS:RPC vs Mouse:RPC	1	4.38975e-134	0.592676	0.106	0.016	5.89631e-130
Mprip	LGS:RPC vs Mouse:RPC	2	1.01174e-133	0.700713	0.25	0.094	1.35896e-129
NEDD1	LGS:RPC vs Mouse:RPC	6	1.37074e-133	-0.529833	0	0.09	1.84118e-129
Lactb	LGS:RPC vs Mouse:RPC	3	4.51204e-133	0.593368	0.122	0.023	6.06057e-129
Cfap97	LGS:RPC vs Mouse:RPC	2	4.84213e-133	0.675453	0.204	0.065	6.50395e-129
Agfg1	LGS:RPC vs Mouse:RPC	1	5.74378e-133	0.649692	0.189	0.056	7.71505e-129
Lypd6	LGS:RPC vs Mouse:RPC	6	9.62286e-133	-0.686494	0.016	0.137	1.29254e-128
Pin4	LGS:RPC vs Mouse:RPC	1	1.28461e-132	0.727351	0.291	0.122	1.72549e-128
Rtn2	LGS:RPC vs Mouse:RPC	2	1.32179e-132	0.618337	0.158	0.04	1.77543e-128
ANKRD26-containing	LGS:RPC vs Mouse:RPC	5	1.6225e-132	-0.573676	0.001	0.093	2.17934e-128
Usp6nl	LGS:RPC vs Mouse:RPC	2	2.68417e-132	0.529856	0.113	0.019	3.60538e-128
Eme2	LGS:RPC vs Mouse:RPC	2	4.06103e-132	0.355188	0.066	0.004	5.45477e-128
Apc	LGS:RPC vs Mouse:RPC	2	4.53313e-132	0.682019	0.215	0.072	6.0889e-128
Nbas	LGS:RPC vs Mouse:RPC	2	5.99107e-132	0.522102	0.107	0.017	8.04721e-128
Ogt	LGS:RPC vs Mouse:RPC	5	6.91068e-132	-0.821942	0.08	0.235	9.28242e-128
Cenpp	LGS:RPC vs Mouse:RPC	6	9.68888e-132	-0.665506	0.02	0.141	1.30141e-127
KCTD5-like	LGS:RPC vs Mouse:RPC	5	1.11765e-131	-0.552595	0.001	0.094	1.50123e-127
Trim33	LGS:RPC vs Mouse:RPC	2	1.38213e-131	0.622673	0.178	0.051	1.85648e-127
Wrnip1	LGS:RPC vs Mouse:RPC	1	1.75974e-131	0.638905	0.205	0.066	2.36368e-127
ZMYND8-like	LGS:RPC vs Mouse:RPC	5	1.98783e-131	-0.546371	0	0.09	2.67006e-127
Eif5	LGS:RPC vs Mouse:RPC	1	2.44466e-131	0.553958	0.709	0.59	3.28367e-127
Echs1	LGS:RPC vs Mouse:RPC	2	2.80539e-131	0.74455	0.424	0.238	3.7682e-127
Dexi	LGS:RPC vs Mouse:RPC	2	2.84442e-131	0.680293	0.202	0.065	3.82063e-127
Esco1	LGS:RPC vs Mouse:RPC	2	2.96376e-131	0.589835	0.141	0.032	3.98092e-127
Pitpnb	LGS:RPC vs Mouse:RPC	1	3.08811e-131	0.768624	0.334	0.161	4.14794e-127
Mif	LGS:RPC vs Mouse:RPC	8	3.37558e-131	0.381228	0.947	0.935	4.53408e-127
Adamts18	LGS:RPC vs Mouse:RPC	1	3.39814e-131	0.425081	0.077	0.007	4.56438e-127
Taldo1	LGS:RPC vs Mouse:RPC	1	3.45538e-131	0.638287	0.598	0.423	4.64127e-127
Arl3	LGS:RPC vs Mouse:RPC	2	3.60012e-131	0.701499	0.507	0.334	4.83569e-127
Nip7	LGS:RPC vs Mouse:RPC	5	4.76985e-131	-0.73502	0.034	0.165	6.40686e-127
Tcea2	LGS:RPC vs Mouse:RPC	2	5.77244e-131	0.422173	0.087	0.01	7.75355e-127
Prex2	LGS:RPC vs Mouse:RPC	1	8.87784e-131	0.428096	0.089	0.011	1.19247e-126
Trappc5	LGS:RPC vs Mouse:RPC	2	9.34041e-131	0.763705	0.313	0.146	1.2546e-126
Tubg1	LGS:RPC vs Mouse:RPC	6	1.04875e-130	-0.755671	0.077	0.23	1.40869e-126
Saysd1	LGS:RPC vs Mouse:RPC	2	1.66054e-130	0.580422	0.168	0.046	2.23044e-126
Mrpl28	LGS:RPC vs Mouse:RPC	5	2.42943e-130	-0.693284	0.251	0.431	3.26321e-126
Csnk2a2	LGS:RPC vs Mouse:RPC	2	2.49716e-130	0.461883	0.089	0.011	3.35419e-126
Clk1	LGS:RPC vs Mouse:RPC	5	2.64855e-130	-0.768039	0.104	0.275	3.55753e-126
Timp3	LGS:RPC vs Mouse:RPC	6	3.37163e-130	-0.748141	0.012	0.126	4.52877e-126
Desi2	LGS:RPC vs Mouse:RPC	5	4.15392e-130	-0.755328	0.055	0.198	5.57954e-126
GLMN-containing	LGS:RPC vs Mouse:RPC	5	4.40861e-130	-0.652184	0.01	0.121	5.92164e-126
Myb	LGS:RPC vs Mouse:RPC	8	6.72647e-130	-0.689533	0.267	0.456	9.03499e-126
Eif3l	LGS:RPC vs Mouse:RPC	6	8.21933e-130	-0.721234	0.166	0.352	1.10402e-125
Sumo3	LGS:RPC vs Mouse:RPC	6	9.93692e-130	-0.681306	0.306	0.488	1.33473e-125
MEG3-containing	LGS:RPC vs Mouse:RPC	5	1.1124e-129	-0.814814	0.017	0.135	1.49417e-125
Zadh2	LGS:RPC vs Mouse:RPC	2	1.646e-129	0.509405	0.104	0.016	2.2109e-125
Sec63	LGS:RPC vs Mouse:RPC	2	1.82056e-129	0.701188	0.24	0.089	2.44538e-125
Scg5	LGS:RPC vs Mouse:RPC	5	2.46748e-129	-0.816005	0.121	0.289	3.31432e-125
Sept11	LGS:RPC vs Mouse:RPC	1	2.90451e-129	0.736958	0.318	0.146	3.90133e-125
Plppr3	LGS:RPC vs Mouse:RPC	2	3.54854e-129	0.690198	0.199	0.063	4.7664e-125
Tnfaip6	LGS:RPC vs Mouse:RPC	6	6.45479e-129	-0.646115	0.033	0.167	8.67007e-125
Dcun1d2	LGS:RPC vs Mouse:RPC	1	6.99483e-129	0.557615	0.124	0.024	9.39546e-125
St6galnac4	LGS:RPC vs Mouse:RPC	2	7.81482e-129	0.513605	0.108	0.018	1.04969e-124
Opa3	LGS:RPC vs Mouse:RPC	5	1.22966e-128	-0.693242	0.029	0.159	1.65168e-124
Csde1	LGS:RPC vs Mouse:RPC	5	1.3479e-128	-0.768616	0.123	0.291	1.81049e-124
Ska2	LGS:RPC vs Mouse:RPC	1	1.80293e-128	0.741179	0.308	0.145	2.4217e-124
Spag7	LGS:RPC vs Mouse:RPC	2	1.93851e-128	0.69118	0.229	0.082	2.6038e-124
Crybg3	LGS:RPC vs Mouse:RPC	1	2.19861e-128	0.443182	0.082	0.009	2.95317e-124
Tbc1d5	LGS:RPC vs Mouse:RPC	1	2.21887e-128	0.504149	0.107	0.017	2.98039e-124
Pak2	LGS:RPC vs Mouse:RPC	1	2.88354e-128	0.745839	0.371	0.195	3.87317e-124
PIR-like	LGS:RPC vs Mouse:RPC	1	5.2083e-128	0.735914	0.124	0.029	6.99579e-124
Txndc17	LGS:RPC vs Mouse:RPC	1	8.36205e-128	0.683435	0.499	0.329	1.12319e-123
Aurka	LGS:RPC vs Mouse:RPC	6	8.64755e-128	-0.699819	0.029	0.151	1.16154e-123
Tfdp2	LGS:RPC vs Mouse:RPC	4	1.2914e-127	-0.751733	0.191	0.369	1.73461e-123
Atp6v1b2	LGS:RPC vs Mouse:RPC	5	1.53988e-127	-0.604119	0.009	0.113	2.06837e-123
TCEA1	LGS:RPC vs Mouse:RPC	5	1.56743e-127	-0.516253	0	0.085	2.10537e-123
Hipk2	LGS:RPC vs Mouse:RPC	2	2.18297e-127	0.678706	0.202	0.066	2.93217e-123
Pip5k1c	LGS:RPC vs Mouse:RPC	2	2.19821e-127	0.579861	0.137	0.031	2.95264e-123
Hspb11	LGS:RPC vs Mouse:RPC	5	2.82381e-127	-0.761601	0.105	0.265	3.79294e-123
Rnmt	LGS:RPC vs Mouse:RPC	1	3.25694e-127	0.734532	0.309	0.138	4.37473e-123
ADGRL2-like	LGS:RPC vs Mouse:RPC	6	8.35705e-127	-0.511802	0	0.086	1.12252e-122
Rpp14	LGS:RPC vs Mouse:RPC	5	9.94121e-127	-0.625397	0.013	0.126	1.3353e-122
Specc1l	LGS:RPC vs Mouse:RPC	2	1.22391e-126	0.59393	0.162	0.043	1.64396e-122
Tmem55a	LGS:RPC vs Mouse:RPC	5	1.72057e-126	-0.650444	0.017	0.132	2.31107e-122
Fbln1	LGS:RPC vs Mouse:RPC	6	2.89074e-126	-0.604655	0.011	0.117	3.88284e-122
Lgals8	LGS:RPC vs Mouse:RPC	2	3.92942e-126	0.508331	0.113	0.021	5.278e-122
Timm13	LGS:RPC vs Mouse:RPC	1	4.09068e-126	0.576924	0.637	0.499	5.4946e-122
Fahd1	LGS:RPC vs Mouse:RPC	2	4.21075e-126	0.622313	0.176	0.051	5.65588e-122
Nup54	LGS:RPC vs Mouse:RPC	1	8.48705e-126	0.562803	0.162	0.044	1.13998e-121
Ccnj	LGS:RPC vs Mouse:RPC	2	9.67742e-126	0.448644	0.095	0.014	1.29987e-121
Uckl1	LGS:RPC vs Mouse:RPC	3	1.0861e-125	0.557027	0.133	0.029	1.45885e-121
Gpx8	LGS:RPC vs Mouse:RPC	6	1.19319e-125	-0.743749	0.066	0.216	1.6027e-121
Vldlr	LGS:RPC vs Mouse:RPC	5	1.58354e-125	-0.646157	0.014	0.124	2.12701e-121
Gab1	LGS:RPC vs Mouse:RPC	1	2.20689e-125	0.621916	0.171	0.049	2.9643e-121
Pcna	LGS:RPC vs Mouse:RPC	8	2.23209e-125	0.710327	0.549	0.387	2.99814e-121
NME6-containing	LGS:RPC vs Mouse:RPC	5	2.27826e-125	-0.514518	0	0.086	3.06015e-121
Emc8	LGS:RPC vs Mouse:RPC	2	2.42263e-125	0.70018	0.451	0.272	3.25407e-121
App	LGS:RPC vs Mouse:RPC	5	3.12313e-125	-0.672848	0.034	0.168	4.19498e-121
Fsd1l	LGS:RPC vs Mouse:RPC	2	3.3459e-125	0.671815	0.235	0.087	4.49421e-121
Trim32	LGS:RPC vs Mouse:RPC	5	6.65006e-125	-0.66508	0.022	0.14	8.93236e-121
Cdkn1a	LGS:RPC vs Mouse:RPC	5	9.49368e-125	-0.673116	0.005	0.103	1.27519e-120
Cdk9	LGS:RPC vs Mouse:RPC	1	1.29344e-124	0.677769	0.207	0.071	1.73735e-120
Nsun2	LGS:RPC vs Mouse:RPC	6	1.42358e-124	-0.731071	0.064	0.212	1.91216e-120
Gpatch2l	LGS:RPC vs Mouse:RPC	2	1.48231e-124	0.436476	0.091	0.012	1.99104e-120
Eml4	LGS:RPC vs Mouse:RPC	2	1.70284e-124	0.688036	0.21	0.073	2.28726e-120
EPHB1-like	LGS:RPC vs Mouse:RPC	6	1.78632e-124	-0.584647	0.005	0.101	2.39939e-120
Hipk1	LGS:RPC vs Mouse:RPC	2	2.05318e-124	0.616068	0.16	0.043	2.75784e-120
Sgtb	LGS:RPC vs Mouse:RPC	3	2.15537e-124	0.450187	0.105	0.018	2.89509e-120
Tmod3	LGS:RPC vs Mouse:RPC	1	5.23939e-124	0.725617	0.286	0.124	7.03755e-120
ZKSCAN3-containing	LGS:RPC vs Mouse:RPC	5	6.59028e-124	-0.65968	0.021	0.14	8.85207e-120
Psmd8	LGS:RPC vs Mouse:RPC	2	1.74401e-123	0.617566	0.599	0.442	2.34256e-119
RRP36	LGS:RPC vs Mouse:RPC	5	2.02591e-123	-0.491989	0	0.082	2.7212e-119
Meis1	LGS:RPC vs Mouse:RPC	5	3.46776e-123	-0.752806	0.141	0.306	4.6579e-119
Pdgfra	LGS:RPC vs Mouse:RPC	1	5.51136e-123	0.454005	0.064	0.004	7.40286e-119
Cdc25c	LGS:RPC vs Mouse:RPC	6	8.1372e-123	-0.650197	0.017	0.128	1.09299e-118
Socs3	LGS:RPC vs Mouse:RPC	5	1.86963e-122	-0.605619	0.004	0.097	2.51129e-118
Ptrh2	LGS:RPC vs Mouse:RPC	1	2.33438e-122	0.697919	0.298	0.132	3.13554e-118
Nkd1	LGS:RPC vs Mouse:RPC	6	3.82466e-122	-0.742237	0.083	0.233	5.13729e-118
Ntan1	LGS:RPC vs Mouse:RPC	5	5.7254e-122	-0.686614	0.034	0.158	7.69035e-118
Klhl36	LGS:RPC vs Mouse:RPC	2	6.05774e-122	0.490991	0.122	0.026	8.13676e-118
Idh1	LGS:RPC vs Mouse:RPC	5	7.403e-122	-0.741638	0.067	0.213	9.9437e-118
DIRC2-like	LGS:RPC vs Mouse:RPC	2	7.60808e-122	0.515694	0.106	0.018	1.02192e-117
Mllt1	LGS:RPC vs Mouse:RPC	1	8.04203e-122	0.504586	0.116	0.022	1.0802e-117
Prss23	LGS:RPC vs Mouse:RPC	8	1.0851e-121	-0.727361	0.277	0.46	1.4575e-117
Erlin2	LGS:RPC vs Mouse:RPC	2	1.12082e-121	0.646201	0.183	0.057	1.50548e-117
Sept2	LGS:RPC vs Mouse:RPC	1	1.46936e-121	0.689453	0.318	0.148	1.97364e-117
Ten1	LGS:RPC vs Mouse:RPC	5	1.63512e-121	-0.695054	0.03	0.156	2.19629e-117
Slc38a1	LGS:RPC vs Mouse:RPC	2	1.70078e-121	0.725458	0.386	0.209	2.28449e-117
Dcun1d4	LGS:RPC vs Mouse:RPC	1	2.02235e-121	0.490355	0.097	0.015	2.71642e-117
Swi5	LGS:RPC vs Mouse:RPC	1	2.64489e-121	0.464279	0.773	0.688	3.55261e-117
Shcbp1	LGS:RPC vs Mouse:RPC	8	3.38423e-121	-0.704817	0.049	0.175	4.5457e-117
Surf4	LGS:RPC vs Mouse:RPC	2	6.37506e-121	0.693885	0.243	0.095	8.56298e-117
Lxn	LGS:RPC vs Mouse:RPC	2	7.58671e-121	0.392949	0.076	0.008	1.01905e-116
Msantd2	LGS:RPC vs Mouse:RPC	2	9.42152e-121	0.584502	0.175	0.053	1.2655e-116
Tecr	LGS:RPC vs Mouse:RPC	5	2.09482e-120	-0.624067	0.334	0.511	2.81376e-116
Dctpp1	LGS:RPC vs Mouse:RPC	6	2.46232e-120	-0.693419	0.26	0.439	3.30738e-116
Psat1	LGS:RPC vs Mouse:RPC	6	2.6201e-120	-0.728826	0.073	0.219	3.51932e-116
Eif1b	LGS:RPC vs Mouse:RPC	2	4.18271e-120	0.605876	0.568	0.419	5.61822e-116
Fiz1	LGS:RPC vs Mouse:RPC	5	5.18899e-120	-0.679173	0.035	0.161	6.96986e-116
Cops7a	LGS:RPC vs Mouse:RPC	5	5.60518e-120	-0.690829	0.044	0.178	7.52888e-116
Zgpat	LGS:RPC vs Mouse:RPC	2	1.08192e-119	0.541647	0.145	0.037	1.45324e-115
Elof1	LGS:RPC vs Mouse:RPC	6	1.27562e-119	-0.650382	0.267	0.444	1.71341e-115
Dnajb12	LGS:RPC vs Mouse:RPC	2	1.42269e-119	0.545077	0.118	0.024	1.91096e-115
Usp13	LGS:RPC vs Mouse:RPC	1	1.81958e-119	0.407133	0.089	0.013	2.44406e-115
Suz12	LGS:RPC vs Mouse:RPC	1	1.8226e-119	0.729979	0.304	0.143	2.44812e-115
Sclt1	LGS:RPC vs Mouse:RPC	6	1.91893e-119	-0.655786	0.025	0.14	2.57751e-115
Khdrbs2	LGS:RPC vs Mouse:RPC	8	2.10984e-119	0.728546	0.264	0.111	2.83394e-115
Ctbp1	LGS:RPC vs Mouse:RPC	6	2.34175e-119	-0.630449	0.319	0.499	3.14544e-115
Prelid2	LGS:RPC vs Mouse:RPC	6	2.44537e-119	-0.622937	0.012	0.118	3.28461e-115
SLC7A5-containing	LGS:RPC vs Mouse:RPC	6	2.55391e-119	-0.49316	0	0.079	3.43042e-115
Alg13	LGS:RPC vs Mouse:RPC	1	3.88518e-119	0.589081	0.169	0.05	5.21858e-115
Nus1	LGS:RPC vs Mouse:RPC	5	4.06397e-119	-0.563842	0.005	0.097	5.45873e-115
CDIPT-containing	LGS:RPC vs Mouse:RPC	5	4.4227e-119	-0.491221	0	0.082	5.94057e-115
Pgm2	LGS:RPC vs Mouse:RPC	7	6.05704e-119	-0.671191	0.032	0.157	8.13581e-115
Fam3c	LGS:RPC vs Mouse:RPC	2	7.15422e-119	0.616435	0.254	0.103	9.60954e-115
Adi1	LGS:RPC vs Mouse:RPC	1	7.80871e-119	0.597096	0.156	0.043	1.04887e-114
Usp16	LGS:RPC vs Mouse:RPC	2	9.74889e-119	0.664688	0.226	0.084	1.30947e-114
Ncoa1	LGS:RPC vs Mouse:RPC	2	1.49637e-118	0.61043	0.195	0.065	2.00993e-114
HIST1H2AL	LGS:RPC vs Mouse:RPC	5	1.54195e-118	-0.505339	0.001	0.082	2.07115e-114
Usp47	LGS:RPC vs Mouse:RPC	2	1.83133e-118	0.666129	0.236	0.091	2.45984e-114
Fam96a	LGS:RPC vs Mouse:RPC	6	2.53171e-118	-0.71462	0.172	0.33	3.40059e-114
Tmem128	LGS:RPC vs Mouse:RPC	5	3.13416e-118	-0.72151	0.066	0.21	4.2098e-114
Fam213b	LGS:RPC vs Mouse:RPC	3	4.15942e-118	0.56012	0.142	0.036	5.58693e-114
Nup43	LGS:RPC vs Mouse:RPC	6	7.59994e-118	-0.54892	0.007	0.104	1.02082e-113
Fam199x	LGS:RPC vs Mouse:RPC	2	9.908e-118	0.458463	0.106	0.02	1.33084e-113
Eva1c	LGS:RPC vs Mouse:RPC	1	1.05545e-117	0.387519	0.066	0.005	1.41768e-113
Tgif2	LGS:RPC vs Mouse:RPC	6	1.63927e-117	-0.583755	0.012	0.115	2.20186e-113
Mrpl34	LGS:RPC vs Mouse:RPC	5	1.79081e-117	-0.720226	0.165	0.335	2.40542e-113
Rbm8a	LGS:RPC vs Mouse:RPC	2	1.86337e-117	0.543958	0.641	0.509	2.50288e-113
Rbm15b	LGS:RPC vs Mouse:RPC	2	2.0797e-117	0.558267	0.16	0.045	2.79346e-113
Txnrd3	LGS:RPC vs Mouse:RPC	1	2.53568e-117	0.391206	0.075	0.008	3.40592e-113
Rbm18	LGS:RPC vs Mouse:RPC	5	2.6324e-117	-0.687787	0.033	0.153	3.53584e-113
Ergic1	LGS:RPC vs Mouse:RPC	1	2.68188e-117	0.736682	0.244	0.1	3.60231e-113
Bloc1s2	LGS:RPC vs Mouse:RPC	5	3.22581e-117	-0.527193	0.002	0.088	4.33291e-113
Ccnt1	LGS:RPC vs Mouse:RPC	5	3.70454e-117	-0.624417	0.016	0.124	4.97593e-113
Dcakd	LGS:RPC vs Mouse:RPC	6	5.48707e-117	-0.706711	0.131	0.281	7.37024e-113
Pcif1	LGS:RPC vs Mouse:RPC	5	7.32765e-117	-0.716037	0.065	0.204	9.8425e-113
Phf3	LGS:RPC vs Mouse:RPC	2	8.76631e-117	0.709511	0.371	0.199	1.17749e-112
Thumpd3	LGS:RPC vs Mouse:RPC	1	1.10347e-116	0.700629	0.259	0.108	1.48218e-112
Pde6d	LGS:RPC vs Mouse:RPC	5	1.23621e-116	-0.681465	0.062	0.201	1.66047e-112
Spr	LGS:RPC vs Mouse:RPC	5	1.33594e-116	-0.612303	0.012	0.115	1.79443e-112
Smarcd1	LGS:RPC vs Mouse:RPC	2	2.18412e-116	0.723982	0.358	0.187	2.93372e-112
Usp33	LGS:RPC vs Mouse:RPC	2	2.25041e-116	0.611912	0.158	0.045	3.02274e-112
Jmjd6	LGS:RPC vs Mouse:RPC	5	3.21005e-116	-0.698016	0.061	0.194	4.31174e-112
Fez1	LGS:RPC vs Mouse:RPC	6	4.87985e-116	-0.630037	0.017	0.126	6.55462e-112
Acat1	LGS:RPC vs Mouse:RPC	5	6.58064e-116	-0.71358	0.111	0.269	8.83911e-112
MIR124-2HG-containing	LGS:RPC vs Mouse:RPC	7	1.0711e-115	-0.734173	0.138	0.299	1.4387e-111
Dync1li2	LGS:RPC vs Mouse:RPC	2	1.11337e-115	0.738013	0.262	0.115	1.49547e-111
Alg12	LGS:RPC vs Mouse:RPC	2	1.21121e-115	0.366513	0.074	0.008	1.6269e-111
Plag1	LGS:RPC vs Mouse:RPC	2	1.39032e-115	0.480351	0.09	0.013	1.86748e-111
Amer1	LGS:RPC vs Mouse:RPC	5	1.46304e-115	-0.497616	0.001	0.083	1.96515e-111
Chml	LGS:RPC vs Mouse:RPC	2	1.52255e-115	0.418742	0.084	0.011	2.04509e-111
Bmpr1b	LGS:RPC vs Mouse:RPC	1	1.77415e-115	0.468211	0.088	0.012	2.38304e-111
EEF1E1	LGS:RPC vs Mouse:RPC	5	3.57452e-115	-0.702492	0.08	0.226	4.8013e-111
Insig1	LGS:RPC vs Mouse:RPC	1	4.32745e-115	0.752098	0.318	0.158	5.81263e-111
Ube2c	LGS:RPC vs Mouse:RPC	8	5.34533e-115	1.04954	0.501	0.333	7.17985e-111
Pus1	LGS:RPC vs Mouse:RPC	1	7.83189e-115	0.608368	0.203	0.071	1.05198e-110
Men1	LGS:RPC vs Mouse:RPC	5	8.32722e-115	-0.606	0.02	0.128	1.11851e-110
Pafah1b3	LGS:RPC vs Mouse:RPC	1	1.78505e-114	0.576346	0.605	0.464	2.39767e-110
DHRS7-like	LGS:RPC vs Mouse:RPC	5	4.37547e-114	-0.494722	0	0.079	5.87713e-110
Itih5	LGS:RPC vs Mouse:RPC	2	6.06143e-114	0.361352	0.055	0.003	8.14171e-110
Chic2	LGS:RPC vs Mouse:RPC	5	1.11249e-113	-0.699863	0.078	0.221	1.49429e-109
Ndrg2	LGS:RPC vs Mouse:RPC	3	1.5165e-113	-0.701684	0.018	0.126	2.03696e-109
Trim13	LGS:RPC vs Mouse:RPC	2	1.85376e-113	0.485935	0.105	0.02	2.48997e-109
Vash1	LGS:RPC vs Mouse:RPC	2	3.75385e-113	0.397423	0.072	0.007	5.04218e-109
Arl6	LGS:RPC vs Mouse:RPC	7	4.20601e-113	-0.681991	0.064	0.192	5.64951e-109
Trmt2a	LGS:RPC vs Mouse:RPC	5	4.42775e-113	-0.625174	0.02	0.13	5.94735e-109
Mpp6	LGS:RPC vs Mouse:RPC	5	5.46051e-113	-0.646273	0.035	0.152	7.33456e-109
Scaf8	LGS:RPC vs Mouse:RPC	2	7.40024e-113	0.512175	0.135	0.034	9.94e-109
Trim24	LGS:RPC vs Mouse:RPC	1	1.03803e-112	0.645839	0.229	0.089	1.39428e-108
Uggt2	LGS:RPC vs Mouse:RPC	1	1.2082e-112	0.445337	0.103	0.019	1.62285e-108
Slc30a10	LGS:RPC vs Mouse:RPC	6	1.29498e-112	-0.542421	0.001	0.082	1.73941e-108
Pomp	LGS:RPC vs Mouse:RPC	6	1.6176e-112	-0.570386	0.41	0.584	2.17275e-108
Fndc5	LGS:RPC vs Mouse:RPC	2	1.89877e-112	0.404624	0.068	0.006	2.55043e-108
Gins2	LGS:RPC vs Mouse:RPC	8	2.29097e-112	-0.739909	0.071	0.205	3.07723e-108
Litaf	LGS:RPC vs Mouse:RPC	1	2.42843e-112	0.630513	0.201	0.071	3.26187e-108
Klhl2	LGS:RPC vs Mouse:RPC	1	2.79374e-112	0.526841	0.142	0.038	3.75256e-108
Hmgb2	LGS:RPC vs Mouse:RPC	8	4.30615e-112	0.550744	0.802	0.864	5.78402e-108
Cplx3	LGS:RPC vs Mouse:RPC	3	4.77522e-112	0.517339	0.08	0.01	6.41408e-108
Snrnp35	LGS:RPC vs Mouse:RPC	2	5.96864e-112	0.660292	0.209	0.078	8.01708e-108
Npy	LGS:RPC vs Mouse:RPC	6	6.14134e-112	-0.651557	0.009	0.104	8.24904e-108
Ublcp1	LGS:RPC vs Mouse:RPC	1	6.80382e-112	0.582212	0.174	0.055	9.13888e-108
Arhgef7	LGS:RPC vs Mouse:RPC	2	7.9231e-112	0.57768	0.141	0.037	1.06423e-107
Aprt	LGS:RPC vs Mouse:RPC	6	9.12178e-112	-0.733747	0.115	0.265	1.22524e-107
COX8A-like	LGS:RPC vs Mouse:RPC	7	2.05898e-111	-0.463068	0.648	0.786	2.76562e-107
Akt1s1	LGS:RPC vs Mouse:RPC	5	3.72688e-111	-0.685325	0.046	0.174	5.00594e-107
Rnf26	LGS:RPC vs Mouse:RPC	6	6.62845e-111	-0.694814	0.114	0.249	8.90333e-107
Mplkip	LGS:RPC vs Mouse:RPC	1	7.5484e-111	0.650887	0.351	0.18	1.0139e-106
Mospd1	LGS:RPC vs Mouse:RPC	5	9.08566e-111	-0.592437	0.011	0.104	1.22039e-106
Ezh2	LGS:RPC vs Mouse:RPC	8	1.0629e-110	-0.521032	0.404	0.596	1.42769e-106
Hacd2	LGS:RPC vs Mouse:RPC	1	1.24652e-110	0.65977	0.232	0.093	1.67432e-106
Commd4	LGS:RPC vs Mouse:RPC	2	1.44811e-110	0.681811	0.372	0.198	1.94511e-106
Elavl1	LGS:RPC vs Mouse:RPC	6	1.48804e-110	-0.618143	0.294	0.461	1.99873e-106
Lrif1	LGS:RPC vs Mouse:RPC	1	1.60165e-110	0.606644	0.204	0.074	2.15133e-106
Appbp2	LGS:RPC vs Mouse:RPC	5	1.73696e-110	-0.692565	0.078	0.213	2.33309e-106
WASF1-like	LGS:RPC vs Mouse:RPC	5	1.93754e-110	-0.437048	0	0.074	2.6025e-106
Ndufaf4	LGS:RPC vs Mouse:RPC	5	2.3398e-110	-0.656442	0.053	0.189	3.14282e-106
Sec22a	LGS:RPC vs Mouse:RPC	5	2.63695e-110	-0.648806	0.029	0.143	3.54195e-106
Ctnnbip1	LGS:RPC vs Mouse:RPC	8	2.74052e-110	-0.591282	0.366	0.533	3.68106e-106
Cited1	LGS:RPC vs Mouse:RPC	3	2.94206e-110	0.482622	0.104	0.02	3.95177e-106
Rpap3	LGS:RPC vs Mouse:RPC	2	3.24193e-110	0.641035	0.239	0.096	4.35456e-106
Cd44	LGS:RPC vs Mouse:RPC	8	4.23528e-110	0.558021	0.14	0.037	5.68883e-106
Tmem150a	LGS:RPC vs Mouse:RPC	2	4.6885e-110	0.386302	0.057	0.004	6.2976e-106
Cep112	LGS:RPC vs Mouse:RPC	1	4.75095e-110	0.616703	0.21	0.078	6.38148e-106
Serinc5	LGS:RPC vs Mouse:RPC	3	4.82801e-110	0.370236	0.064	0.006	6.48498e-106
Kif22	LGS:RPC vs Mouse:RPC	8	5.43939e-110	-0.74298	0.138	0.273	7.30619e-106
Hmces	LGS:RPC vs Mouse:RPC	5	5.50414e-110	-0.494895	0.003	0.085	7.39316e-106
Ttll1	LGS:RPC vs Mouse:RPC	2	6.20815e-110	0.523791	0.117	0.026	8.33878e-106
Parp9	LGS:RPC vs Mouse:RPC	1	7.67139e-110	0.458323	0.086	0.013	1.03042e-105
Mapre3	LGS:RPC vs Mouse:RPC	3	9.1205e-110	0.486741	0.094	0.016	1.22507e-105
Golim4	LGS:RPC vs Mouse:RPC	5	9.55174e-110	-0.701785	0.049	0.176	1.28299e-105
Rnf13	LGS:RPC vs Mouse:RPC	5	1.0142e-109	-0.710276	0.07	0.208	1.36228e-105
Ap4m1	LGS:RPC vs Mouse:RPC	5	1.13012e-109	-0.554763	0.006	0.095	1.51797e-105
Ccdc167	LGS:RPC vs Mouse:RPC	2	1.24093e-109	0.669251	0.209	0.078	1.66681e-105
Ubap2l	LGS:RPC vs Mouse:RPC	5	1.77426e-109	-0.697171	0.147	0.311	2.38319e-105
Nmd3	LGS:RPC vs Mouse:RPC	5	2.24671e-109	-0.617076	0.026	0.139	3.01778e-105
Slc39a7	LGS:RPC vs Mouse:RPC	2	2.53639e-109	0.710578	0.275	0.127	3.40688e-105
Josd2	LGS:RPC vs Mouse:RPC	6	9.37976e-109	-0.657733	0.069	0.213	1.25989e-104
Ttc9b	LGS:RPC vs Mouse:RPC	2	1.02427e-108	0.393837	0.06	0.005	1.3758e-104
Stard4	LGS:RPC vs Mouse:RPC	6	1.13037e-108	-0.569182	0.015	0.117	1.51832e-104
Pole4	LGS:RPC vs Mouse:RPC	5	1.33256e-108	-0.706441	0.13	0.282	1.78989e-104
Hirip3	LGS:RPC vs Mouse:RPC	8	1.71086e-108	-0.632224	0.181	0.355	2.29803e-104
Commd6	LGS:RPC vs Mouse:RPC	2	3.19074e-108	0.704028	0.346	0.185	4.2858e-104
Usp9x	LGS:RPC vs Mouse:RPC	2	3.38478e-108	0.586007	0.16	0.048	4.54644e-104
Rimklb	LGS:RPC vs Mouse:RPC	1	4.00999e-108	0.524948	0.143	0.039	5.38621e-104
Pank3	LGS:RPC vs Mouse:RPC	2	4.71783e-108	0.521045	0.134	0.035	6.33699e-104
Fam168a	LGS:RPC vs Mouse:RPC	5	5.67518e-108	-0.656758	0.042	0.166	7.62291e-104
Dcp1a	LGS:RPC vs Mouse:RPC	2	6.00262e-108	0.396009	0.078	0.01	8.06272e-104
Hs3st4	LGS:RPC vs Mouse:RPC	6	6.89478e-108	-0.46303	0.001	0.076	9.26107e-104
B3glct	LGS:RPC vs Mouse:RPC	6	7.03275e-108	-0.609862	0.025	0.137	9.44638e-104
Tpbg	LGS:RPC vs Mouse:RPC	6	7.85784e-108	-0.534267	0.006	0.093	1.05547e-103
Smarca2	LGS:RPC vs Mouse:RPC	5	1.06722e-107	-0.566635	0.011	0.106	1.43349e-103
Phip	LGS:RPC vs Mouse:RPC	5	1.08074e-107	-0.611172	0.323	0.483	1.45166e-103
Srgap1	LGS:RPC vs Mouse:RPC	1	1.14847e-107	0.461841	0.097	0.017	1.54262e-103
Lias	LGS:RPC vs Mouse:RPC	5	1.43217e-107	-0.580652	0.017	0.122	1.92369e-103
Snrnp40	LGS:RPC vs Mouse:RPC	6	2.09447e-107	-0.63166	0.246	0.397	2.81329e-103
COA5-containing	LGS:RPC vs Mouse:RPC	2	2.14552e-107	0.540558	0.147	0.042	2.88187e-103
Hnrnpl	LGS:RPC vs Mouse:RPC	6	2.15184e-107	-0.618006	0.258	0.429	2.89035e-103
Zc3h8	LGS:RPC vs Mouse:RPC	2	2.36335e-107	0.535549	0.116	0.026	3.17445e-103
Pde9a	LGS:RPC vs Mouse:RPC	2	2.81675e-107	0.436333	0.084	0.012	3.78346e-103
Ntpcr	LGS:RPC vs Mouse:RPC	2	2.98099e-107	0.48748	0.105	0.021	4.00407e-103
Strn	LGS:RPC vs Mouse:RPC	1	4.00214e-107	0.414768	0.117	0.028	5.37567e-103
Limd1	LGS:RPC vs Mouse:RPC	5	4.30306e-107	-0.581401	0.017	0.119	5.77987e-103
Tmem69	LGS:RPC vs Mouse:RPC	2	4.61622e-107	0.443385	0.102	0.02	6.2005e-103
Arfgef1	LGS:RPC vs Mouse:RPC	2	5.26488e-107	0.57202	0.164	0.051	7.07178e-103
Tprkb	LGS:RPC vs Mouse:RPC	2	7.254e-107	0.574791	0.224	0.089	9.74357e-103
Matr3	LGS:RPC vs Mouse:RPC	1	7.98433e-107	0.529475	0.616	0.495	1.07246e-102
Ggps1	LGS:RPC vs Mouse:RPC	2	9.54645e-107	0.518766	0.166	0.054	1.28228e-102
Sod2	LGS:RPC vs Mouse:RPC	5	1.66587e-106	-0.672846	0.088	0.232	2.2376e-102
Aldh1a1	LGS:RPC vs Mouse:RPC	6	1.72467e-106	-0.65273	0.009	0.102	2.31657e-102
Saraf	LGS:RPC vs Mouse:RPC	2	2.16251e-106	0.682173	0.34	0.176	2.90468e-102
Elmod3	LGS:RPC vs Mouse:RPC	2	2.9988e-106	0.537765	0.119	0.028	4.02798e-102
Mcts1	LGS:RPC vs Mouse:RPC	3	3.03443e-106	0.667086	0.265	0.118	4.07585e-102
Apopt1	LGS:RPC vs Mouse:RPC	2	3.82786e-106	0.632581	0.267	0.118	5.14159e-102
Ubl5	LGS:RPC vs Mouse:RPC	3	7.43868e-106	0.503869	0.651	0.55	9.99163e-102
Guf1	LGS:RPC vs Mouse:RPC	5	8.59552e-106	-0.66964	0.041	0.151	1.15455e-101
Lrrc57	LGS:RPC vs Mouse:RPC	2	8.85568e-106	0.578581	0.174	0.058	1.18949e-101
Cbs	LGS:RPC vs Mouse:RPC	1	1.35463e-105	0.388742	0.067	0.007	1.81954e-101
Mtdh	LGS:RPC vs Mouse:RPC	2	1.65577e-105	0.603651	0.552	0.407	2.22403e-101
Tle2	LGS:RPC vs Mouse:RPC	2	3.08962e-105	0.354902	0.053	0.003	4.14998e-101
Pdk3	LGS:RPC vs Mouse:RPC	6	3.86414e-105	-0.601891	0.035	0.153	5.19031e-101
Khsrp	LGS:RPC vs Mouse:RPC	2	5.70624e-105	0.533409	0.151	0.045	7.66462e-101
Atg12	LGS:RPC vs Mouse:RPC	5	6.36556e-105	-0.643145	0.049	0.173	8.55022e-101
Adss	LGS:RPC vs Mouse:RPC	6	7.02969e-105	-0.680818	0.114	0.257	9.44229e-101
SETDB2-like	LGS:RPC vs Mouse:RPC	3	7.42998e-105	0.458469	0.091	0.016	9.97995e-101
VASP	LGS:RPC vs Mouse:RPC	5	7.94841e-105	-0.424096	0	0.07	1.06763e-100
TRPM7-like	LGS:RPC vs Mouse:RPC	5	9.12081e-105	-0.548379	0.01	0.1	1.22511e-100
Uhmk1	LGS:RPC vs Mouse:RPC	2	1.01481e-104	0.445598	0.098	0.019	1.3631e-100
Fchsd2	LGS:RPC vs Mouse:RPC	6	1.13824e-104	-0.66379	0.044	0.165	1.52888e-100
Ctbs	LGS:RPC vs Mouse:RPC	1	1.74005e-104	0.544337	0.106	0.022	2.33724e-100
Smg6	LGS:RPC vs Mouse:RPC	2	3.96461e-104	0.571957	0.243	0.103	5.32526e-100
Phkg2	LGS:RPC vs Mouse:RPC	1	5.35692e-104	0.640043	0.228	0.094	7.19542e-100
TUBB2A-containing	LGS:RPC vs Mouse:RPC	5	6.70567e-104	-0.450753	0.001	0.076	9.00706e-100
Fbxo5	LGS:RPC vs Mouse:RPC	8	6.81819e-104	-0.717432	0.126	0.269	9.15819e-100
Nasp	LGS:RPC vs Mouse:RPC	8	1.50512e-103	-0.503844	0.515	0.684	2.02168e-99
Ccnd3	LGS:RPC vs Mouse:RPC	6	2.22957e-103	-0.624275	0.038	0.154	2.99476e-99
Ccng1	LGS:RPC vs Mouse:RPC	2	3.25527e-103	0.588388	0.145	0.042	4.37248e-99
Ppil2	LGS:RPC vs Mouse:RPC	5	5.66775e-103	-0.65052	0.075	0.208	7.61293e-99
Osgepl1	LGS:RPC vs Mouse:RPC	5	6.27688e-103	-0.525356	0.007	0.093	8.4311e-99
Dhx36	LGS:RPC vs Mouse:RPC	2	6.68747e-103	0.673845	0.35	0.187	8.98261e-99
Stk24	LGS:RPC vs Mouse:RPC	1	7.76954e-103	0.642802	0.214	0.084	1.0436e-98
RMST-containing	LGS:RPC vs Mouse:RPC	6	9.53983e-103	-0.531714	0.003	0.081	1.28139e-98
Yipf5	LGS:RPC vs Mouse:RPC	5	9.56795e-103	-0.654649	0.07	0.205	1.28517e-98
Cdkn2aip	LGS:RPC vs Mouse:RPC	1	1.396e-102	0.532121	0.195	0.073	1.8751e-98
SMG9-like	LGS:RPC vs Mouse:RPC	5	1.91135e-102	-0.415237	0	0.068	2.56732e-98
Dctn4	LGS:RPC vs Mouse:RPC	2	1.98722e-102	0.700142	0.214	0.086	2.66924e-98
Hpcal1	LGS:RPC vs Mouse:RPC	2	2.20226e-102	0.627805	0.156	0.05	2.95808e-98
Gpatch2	LGS:RPC vs Mouse:RPC	2	2.30612e-102	0.618632	0.225	0.092	3.09759e-98
Nudt8	LGS:RPC vs Mouse:RPC	3	2.38693e-102	0.465519	0.104	0.022	3.20612e-98
Gclm	LGS:RPC vs Mouse:RPC	5	5.52758e-102	-0.563595	0.019	0.118	7.42464e-98
Pim1	LGS:RPC vs Mouse:RPC	6	5.6436e-102	-0.707727	0.106	0.23	7.58049e-98
Hells	LGS:RPC vs Mouse:RPC	8	6.49844e-102	0.732486	0.409	0.272	8.7287e-98
Ltn1	LGS:RPC vs Mouse:RPC	2	8.81948e-102	0.529597	0.135	0.037	1.18463e-97
Gltp	LGS:RPC vs Mouse:RPC	6	1.57569e-101	-0.664932	0.084	0.223	2.11646e-97
Mtx2	LGS:RPC vs Mouse:RPC	5	1.6381e-101	-0.658263	0.086	0.217	2.20029e-97
Eif4e	LGS:RPC vs Mouse:RPC	6	1.70837e-101	-0.636965	0.188	0.33	2.29468e-97
St8sia2	LGS:RPC vs Mouse:RPC	1	1.80333e-101	0.54339	0.138	0.039	2.42223e-97
Lrrc58	LGS:RPC vs Mouse:RPC	1	1.82485e-101	0.615131	0.255	0.112	2.45114e-97
Llgl1	LGS:RPC vs Mouse:RPC	5	1.8759e-101	-0.474955	0.004	0.085	2.51972e-97
Wdyhv1	LGS:RPC vs Mouse:RPC	1	2.08884e-101	0.499328	0.131	0.035	2.80574e-97
Ube2h	LGS:RPC vs Mouse:RPC	2	2.76883e-101	0.497198	0.111	0.025	3.71909e-97
Snrnp70	LGS:RPC vs Mouse:RPC	6	2.86251e-101	-0.623397	0.234	0.393	3.84492e-97
Lgmn	LGS:RPC vs Mouse:RPC	5	2.99908e-101	-0.592313	0.02	0.12	4.02836e-97
Zfyve1	LGS:RPC vs Mouse:RPC	2	3.19971e-101	0.416758	0.073	0.009	4.29785e-97
Ndrg1	LGS:RPC vs Mouse:RPC	7	4.52984e-101	-0.690067	0.087	0.222	6.08448e-97
DDIT3	LGS:RPC vs Mouse:RPC	5	4.53075e-101	-0.436284	0	0.07	6.0857e-97
Aspm	LGS:RPC vs Mouse:RPC	8	5.99611e-101	0.72356	0.158	0.079	8.05398e-97
Rad54l	LGS:RPC vs Mouse:RPC	6	7.31103e-101	-0.634498	0.036	0.143	9.82018e-97
Mcl1	LGS:RPC vs Mouse:RPC	5	8.4298e-101	-0.586558	0.022	0.124	1.13229e-96
Mcat	LGS:RPC vs Mouse:RPC	5	8.57187e-101	-0.450205	0.002	0.076	1.15137e-96
Psmc3ip	LGS:RPC vs Mouse:RPC	6	9.73349e-101	-0.652893	0.06	0.177	1.3074e-96
Ahsa1	LGS:RPC vs Mouse:RPC	1	9.89056e-101	0.656096	0.295	0.145	1.3285e-96
Fkbp7	LGS:RPC vs Mouse:RPC	1	1.07089e-100	0.4562	0.103	0.022	1.43842e-96
JMJD1C-like	LGS:RPC vs Mouse:RPC	5	1.2962e-100	-0.484437	0.003	0.079	1.74106e-96
Tmem138	LGS:RPC vs Mouse:RPC	5	1.55406e-100	-0.652935	0.081	0.205	2.08741e-96
Creld2	LGS:RPC vs Mouse:RPC	2	2.05657e-100	0.635289	0.214	0.087	2.76239e-96
COA6-containing	LGS:RPC vs Mouse:RPC	2	3.0297e-100	0.648361	0.243	0.107	4.0695e-96
RIT1	LGS:RPC vs Mouse:RPC	5	3.39131e-100	-0.414732	0	0.067	4.55521e-96
Stmn4	LGS:RPC vs Mouse:RPC	1	3.40509e-100	0.642062	0.123	0.034	4.57372e-96
Insig2	LGS:RPC vs Mouse:RPC	5	3.51817e-100	-0.561013	0.015	0.111	4.72561e-96
Dfna5	LGS:RPC vs Mouse:RPC	5	3.66922e-100	-0.618581	0.036	0.15	4.9285e-96
Spg21	LGS:RPC vs Mouse:RPC	5	4.98522e-100	-0.653022	0.097	0.238	6.69615e-96
Gcc2	LGS:RPC vs Mouse:RPC	2	5.00898e-100	0.617115	0.226	0.093	6.72807e-96
Ndufs3	LGS:RPC vs Mouse:RPC	2	5.52972e-100	0.629782	0.295	0.144	7.42752e-96
Rasd1	LGS:RPC vs Mouse:RPC	1	5.95725e-100	0.475826	0.081	0.013	8.00178e-96
Fgf3	LGS:RPC vs Mouse:RPC	6	6.12625e-100	-0.420654	0	0.067	8.22878e-96
Psmc4	LGS:RPC vs Mouse:RPC	6	7.86255e-100	-0.573702	0.274	0.441	1.0561e-95
Rangap1	LGS:RPC vs Mouse:RPC	6	7.98346e-100	-0.659009	0.129	0.269	1.07234e-95
Eif2a	LGS:RPC vs Mouse:RPC	5	8.50796e-100	-0.656008	0.095	0.236	1.14279e-95
Pex1	LGS:RPC vs Mouse:RPC	2	9.83033e-100	0.465318	0.104	0.023	1.32041e-95
Slk	LGS:RPC vs Mouse:RPC	2	1.07561e-99	0.5086	0.141	0.041	1.44476e-95
Ndufv2	LGS:RPC vs Mouse:RPC	5	1.36209e-99	-0.588315	0.292	0.445	1.82956e-95
COIL	LGS:RPC vs Mouse:RPC	5	1.72401e-99	-0.414712	0	0.066	2.31569e-95
Peli2	LGS:RPC vs Mouse:RPC	2	2.07104e-99	0.39556	0.091	0.017	2.78183e-95
MTERF3-like	LGS:RPC vs Mouse:RPC	5	2.31686e-99	-0.416366	0	0.066	3.11201e-95
Parp2	LGS:RPC vs Mouse:RPC	6	2.56467e-99	-0.645895	0.067	0.196	3.44487e-95
CREM	LGS:RPC vs Mouse:RPC	5	3.23596e-99	-0.435333	0.001	0.07	4.34654e-95
TERF1-like	LGS:RPC vs Mouse:RPC	6	6.37616e-99	-0.611157	0.058	0.169	8.56446e-95
Traf4	LGS:RPC vs Mouse:RPC	2	7.50082e-99	0.597288	0.19	0.07	1.00751e-94
Tjp2	LGS:RPC vs Mouse:RPC	6	9.41395e-99	-0.539417	0.015	0.107	1.26448e-94
Hnrnph2	LGS:RPC vs Mouse:RPC	5	1.47656e-98	-0.588179	0.029	0.138	1.98332e-94
Lin52	LGS:RPC vs Mouse:RPC	1	1.47702e-98	0.554629	0.137	0.039	1.98394e-94
Atg10	LGS:RPC vs Mouse:RPC	2	2.11615e-98	0.437787	0.128	0.036	2.84242e-94
Asf1b	LGS:RPC vs Mouse:RPC	8	2.89094e-98	-0.641744	0.067	0.194	3.8831e-94
Tmem126b	LGS:RPC vs Mouse:RPC	2	3.03997e-98	0.57341	0.185	0.067	4.08329e-94
Flt1	LGS:RPC vs Mouse:RPC	1	3.52962e-98	0.485084	0.071	0.01	4.74099e-94
Cit	LGS:RPC vs Mouse:RPC	6	3.63951e-98	-0.570123	0.027	0.13	4.8886e-94
Dpy19l3	LGS:RPC vs Mouse:RPC	1	4.73183e-98	0.475215	0.102	0.022	6.35579e-94
Plxnb1	LGS:RPC vs Mouse:RPC	2	4.83101e-98	0.51028	0.115	0.028	6.48902e-94
Blcap	LGS:RPC vs Mouse:RPC	3	6.00015e-98	0.632474	0.2	0.078	8.0594e-94
Pcyox1	LGS:RPC vs Mouse:RPC	2	6.28943e-98	0.586606	0.144	0.043	8.44796e-94
Sav1	LGS:RPC vs Mouse:RPC	1	6.68292e-98	0.52281	0.151	0.047	8.97649e-94
Wrb	LGS:RPC vs Mouse:RPC	5	7.07661e-98	-0.619494	0.046	0.158	9.50531e-94
Lrrfip1	LGS:RPC vs Mouse:RPC	8	7.40229e-98	-0.654709	0.18	0.342	9.94276e-94
TSPYL4	LGS:RPC vs Mouse:RPC	5	8.02437e-98	-0.41551	0	0.065	1.07783e-93
Plppr1	LGS:RPC vs Mouse:RPC	6	1.27625e-97	-0.534485	0.011	0.098	1.71425e-93
Cdkn1b	LGS:RPC vs Mouse:RPC	1	1.36375e-97	0.644091	0.305	0.156	1.83179e-93
Ccdc59	LGS:RPC vs Mouse:RPC	5	1.37382e-97	-0.638329	0.136	0.286	1.84531e-93
Tma16	LGS:RPC vs Mouse:RPC	2	1.46917e-97	0.576893	0.16	0.053	1.97339e-93
Fbxo32	LGS:RPC vs Mouse:RPC	2	1.81891e-97	0.446133	0.071	0.009	2.44315e-93
Tsnax	LGS:RPC vs Mouse:RPC	5	1.96474e-97	-0.615953	0.055	0.178	2.63905e-93
Shisa2	LGS:RPC vs Mouse:RPC	5	2.35134e-97	-0.720493	0.058	0.171	3.15831e-93
Ptpn4	LGS:RPC vs Mouse:RPC	2	3.24322e-97	0.431806	0.103	0.023	4.3563e-93
Fbxw2	LGS:RPC vs Mouse:RPC	5	3.4521e-97	-0.630708	0.102	0.246	4.63687e-93
Maoa	LGS:RPC vs Mouse:RPC	6	3.50681e-97	-0.480561	0.006	0.088	4.71035e-93
Mta1	LGS:RPC vs Mouse:RPC	1	4.64354e-97	0.560747	0.213	0.086	6.23721e-93
Akt3	LGS:RPC vs Mouse:RPC	2	4.79329e-97	0.476349	0.128	0.035	6.43834e-93
Daam1	LGS:RPC vs Mouse:RPC	2	6.24547e-97	0.63148	0.265	0.123	8.38891e-93
Seh1l	LGS:RPC vs Mouse:RPC	6	1.1925e-96	-0.631978	0.073	0.201	1.60176e-92
Fn3krp	LGS:RPC vs Mouse:RPC	2	1.80086e-96	0.351747	0.067	0.008	2.41891e-92
Ddx21	LGS:RPC vs Mouse:RPC	1	2.24274e-96	0.691859	0.252	0.117	3.01245e-92
Dbn1	LGS:RPC vs Mouse:RPC	5	3.58707e-96	-0.620167	0.151	0.303	4.81815e-92
Shisa4	LGS:RPC vs Mouse:RPC	5	3.66445e-96	-0.649166	0.095	0.235	4.92209e-92
Leng8	LGS:RPC vs Mouse:RPC	2	3.74811e-96	0.560637	0.167	0.057	5.03447e-92
TRAIP	LGS:RPC vs Mouse:RPC	6	4.31081e-96	-0.368747	0	0.064	5.79027e-92
Ctu1	LGS:RPC vs Mouse:RPC	2	4.63231e-96	0.424974	0.095	0.019	6.22212e-92
Rhbdl3	LGS:RPC vs Mouse:RPC	5	4.66806e-96	-0.509198	0.003	0.077	6.27013e-92
Kpna2	LGS:RPC vs Mouse:RPC	8	5.59397e-96	0.726333	0.2	0.091	7.51382e-92
Zfp36	LGS:RPC vs Mouse:RPC	6	6.48777e-96	-0.481732	0.002	0.073	8.71438e-92
PCDH11X	LGS:RPC vs Mouse:RPC	6	6.81319e-96	-0.449441	0.001	0.067	9.15148e-92
Cherp	LGS:RPC vs Mouse:RPC	5	6.99193e-96	-0.460802	0.005	0.083	9.39156e-92
Pmpca	LGS:RPC vs Mouse:RPC	5	1.15422e-95	-0.588448	0.035	0.145	1.55035e-91
Ctso	LGS:RPC vs Mouse:RPC	6	1.40852e-95	-0.512792	0.008	0.091	1.89192e-91
Pde3a	LGS:RPC vs Mouse:RPC	1	1.90205e-95	0.52695	0.121	0.032	2.55483e-91
Myo9b	LGS:RPC vs Mouse:RPC	1	2.23136e-95	0.453611	0.101	0.022	2.99716e-91
Camkk2	LGS:RPC vs Mouse:RPC	2	2.2363e-95	0.475487	0.102	0.023	3.0038e-91
Fcho2	LGS:RPC vs Mouse:RPC	2	3.43933e-95	0.458388	0.118	0.031	4.61971e-91
Taz	LGS:RPC vs Mouse:RPC	5	3.88508e-95	-0.584602	0.031	0.138	5.21844e-91
Srrt	LGS:RPC vs Mouse:RPC	6	4.63979e-95	-0.625058	0.156	0.304	6.23217e-91
Cdc23	LGS:RPC vs Mouse:RPC	5	4.88701e-95	-0.585082	0.04	0.152	6.56423e-91
Rdh10	LGS:RPC vs Mouse:RPC	5	5.38158e-95	-0.652135	0.041	0.154	7.22854e-91
Rrp1b	LGS:RPC vs Mouse:RPC	1	6.69402e-95	0.605603	0.235	0.102	8.99141e-91
Tet1	LGS:RPC vs Mouse:RPC	2	6.87354e-95	0.554971	0.158	0.052	9.23254e-91
Arhgef10l	LGS:RPC vs Mouse:RPC	1	7.76837e-95	0.461223	0.107	0.025	1.04345e-90
Sos1	LGS:RPC vs Mouse:RPC	2	8.21651e-95	0.45224	0.109	0.026	1.10364e-90
Ebpl	LGS:RPC vs Mouse:RPC	7	9.30431e-95	-0.593364	0.025	0.123	1.24976e-90
Hap1	LGS:RPC vs Mouse:RPC	5	9.47119e-95	-0.461635	0.003	0.077	1.27217e-90
Dnajc5	LGS:RPC vs Mouse:RPC	5	9.66756e-95	-0.608263	0.051	0.167	1.29855e-90
Eed	LGS:RPC vs Mouse:RPC	6	9.70805e-95	-0.632697	0.087	0.212	1.30399e-90
Myef2	LGS:RPC vs Mouse:RPC	5	1.19615e-94	-0.687953	0.118	0.243	1.60667e-90
Gars	LGS:RPC vs Mouse:RPC	6	1.20774e-94	-0.62493	0.09	0.223	1.62224e-90
Nuak2	LGS:RPC vs Mouse:RPC	5	1.3885e-94	-0.546561	0.015	0.103	1.86504e-90
Fam220a	LGS:RPC vs Mouse:RPC	5	1.40504e-94	-0.630748	0.06	0.18	1.88725e-90
SENP5-like	LGS:RPC vs Mouse:RPC	2	1.7835e-94	0.486786	0.12	0.031	2.39559e-90
Kctd8	LGS:RPC vs Mouse:RPC	6	2.03856e-94	-0.511366	0.007	0.084	2.7382e-90
EXOC1	LGS:RPC vs Mouse:RPC	2	2.13842e-94	0.569187	0.168	0.058	2.87232e-90
Podxl2	LGS:RPC vs Mouse:RPC	5	2.45767e-94	-0.487694	0.006	0.084	3.30114e-90
Prepl	LGS:RPC vs Mouse:RPC	2	2.50088e-94	0.400731	0.089	0.017	3.35918e-90
Det1	LGS:RPC vs Mouse:RPC	1	2.83063e-94	0.506771	0.146	0.046	3.80211e-90
Lasp1	LGS:RPC vs Mouse:RPC	6	3.19082e-94	-0.548	0.028	0.133	4.28591e-90
Bax	LGS:RPC vs Mouse:RPC	5	5.53385e-94	-0.612327	0.175	0.325	7.43307e-90
Gdpd1	LGS:RPC vs Mouse:RPC	5	8.04748e-94	-0.674508	0.058	0.178	1.08094e-89
Ranbp9	LGS:RPC vs Mouse:RPC	2	9.26571e-94	0.408883	0.11	0.028	1.24457e-89
MAGI1	LGS:RPC vs Mouse:RPC	5	9.89985e-94	-0.517928	0.011	0.094	1.32975e-89
Lrrc4	LGS:RPC vs Mouse:RPC	3	1.01294e-93	0.369661	0.052	0.004	1.36059e-89
Prrc2a	LGS:RPC vs Mouse:RPC	2	1.03711e-93	0.652134	0.251	0.117	1.39304e-89
UQCRC2	LGS:RPC vs Mouse:RPC	5	1.12939e-93	-0.587149	0.256	0.411	1.51699e-89
GAP43	LGS:RPC vs Mouse:RPC	5	1.34991e-93	-0.394624	0	0.063	1.8132e-89
Galnt1	LGS:RPC vs Mouse:RPC	1	1.49016e-93	0.586363	0.246	0.111	2.00159e-89
Mrgbp	LGS:RPC vs Mouse:RPC	2	1.51116e-93	0.577288	0.216	0.09	2.02979e-89
Ndufb5	LGS:RPC vs Mouse:RPC	7	1.58895e-93	-0.511191	0.401	0.558	2.13428e-89
Krcc1	LGS:RPC vs Mouse:RPC	3	1.78606e-93	-0.636514	0.059	0.174	2.39903e-89
Rchy1	LGS:RPC vs Mouse:RPC	5	1.81631e-93	-0.646533	0.096	0.226	2.43967e-89
Ctsz	LGS:RPC vs Mouse:RPC	5	2.08569e-93	-0.59821	0.033	0.137	2.8015e-89
Yipf2	LGS:RPC vs Mouse:RPC	2	2.25006e-93	0.536665	0.137	0.041	3.02228e-89
RBM20-like	LGS:RPC vs Mouse:RPC	6	3.40114e-93	-0.431202	0	0.065	4.56841e-89
Cdc42ep4	LGS:RPC vs Mouse:RPC	6	3.42045e-93	-0.58486	0.083	0.219	4.59434e-89
Tmem237	LGS:RPC vs Mouse:RPC	7	3.65205e-93	-0.631596	0.098	0.223	4.90543e-89
Napepld	LGS:RPC vs Mouse:RPC	1	3.76561e-93	0.471881	0.104	0.024	5.05797e-89
Fam13b	LGS:RPC vs Mouse:RPC	2	4.19703e-93	0.447484	0.117	0.031	5.63744e-89
SURF1-like	LGS:RPC vs Mouse:RPC	2	4.3127e-93	0.553169	0.188	0.072	5.79282e-89
B3galnt2	LGS:RPC vs Mouse:RPC	1	5.35361e-93	0.493485	0.148	0.047	7.19096e-89
Ngly1	LGS:RPC vs Mouse:RPC	2	5.45652e-93	0.495695	0.155	0.052	7.3292e-89
Bcap31	LGS:RPC vs Mouse:RPC	1	6.89356e-93	0.637626	0.37	0.215	9.25943e-89
Ehd2	LGS:RPC vs Mouse:RPC	6	7.89644e-93	-0.396272	0	0.062	1.06065e-88
Gpc6	LGS:RPC vs Mouse:RPC	8	8.41044e-93	-0.649135	0.065	0.187	1.12969e-88
Notch1	LGS:RPC vs Mouse:RPC	8	1.19983e-92	0.59709	0.482	0.324	1.61161e-88
Farp1	LGS:RPC vs Mouse:RPC	2	1.82493e-92	0.405665	0.077	0.013	2.45124e-88
Map4k3	LGS:RPC vs Mouse:RPC	2	2.08492e-92	0.375182	0.08	0.014	2.80046e-88
Nckap1	LGS:RPC vs Mouse:RPC	1	2.43164e-92	0.562495	0.194	0.076	3.26618e-88
Mettl1	LGS:RPC vs Mouse:RPC	6	4.77915e-92	-0.65004	0.045	0.156	6.41935e-88
Tex9	LGS:RPC vs Mouse:RPC	5	5.30934e-92	-0.563019	0.028	0.122	7.1315e-88
Mapk8ip3	LGS:RPC vs Mouse:RPC	2	5.54049e-92	0.536862	0.158	0.054	7.44199e-88
Celf2	LGS:RPC vs Mouse:RPC	6	5.54773e-92	-0.455318	0.53	0.679	7.45171e-88
Lztfl1	LGS:RPC vs Mouse:RPC	5	6.15414e-92	-0.634965	0.074	0.193	8.26625e-88
Gtf2a1	LGS:RPC vs Mouse:RPC	1	8.0003e-92	0.461342	0.138	0.043	1.0746e-87
Ptpru	LGS:RPC vs Mouse:RPC	8	8.38683e-92	0.539094	0.162	0.056	1.12652e-87
Tomm40	LGS:RPC vs Mouse:RPC	5	9.27306e-92	-0.60008	0.166	0.32	1.24556e-87
Ift122	LGS:RPC vs Mouse:RPC	5	1.17805e-91	-0.446446	0.004	0.078	1.58235e-87
Trim35	LGS:RPC vs Mouse:RPC	5	1.25147e-91	-0.58635	0.046	0.157	1.68098e-87
NEK1	LGS:RPC vs Mouse:RPC	5	1.29207e-91	-0.374729	0	0.061	1.7355e-87
Rev3l	LGS:RPC vs Mouse:RPC	2	1.30871e-91	0.49925	0.149	0.049	1.75786e-87
Gtf3a	LGS:RPC vs Mouse:RPC	1	1.45327e-91	0.65672	0.328	0.178	1.95203e-87
Eif4ebp2	LGS:RPC vs Mouse:RPC	1	2.11922e-91	0.59551	0.223	0.096	2.84653e-87
Abhd14a	LGS:RPC vs Mouse:RPC	5	2.62542e-91	-0.542725	0.025	0.124	3.52646e-87
Fam208a	LGS:RPC vs Mouse:RPC	2	3.98577e-91	0.487287	0.137	0.042	5.35369e-87
Gli3	LGS:RPC vs Mouse:RPC	6	4.65529e-91	-0.594281	0.037	0.144	6.25299e-87
Plin2	LGS:RPC vs Mouse:RPC	4	5.63026e-91	-0.53659	0.021	0.117	7.56256e-87
Cachd1	LGS:RPC vs Mouse:RPC	1	8.98164e-91	0.36789	0.063	0.008	1.20641e-86
DUSP18-like	LGS:RPC vs Mouse:RPC	5	1.01183e-90	-0.393783	0	0.061	1.35909e-86
Dnajc24	LGS:RPC vs Mouse:RPC	6	1.11762e-90	-0.584008	0.06	0.181	1.50118e-86
Cask	LGS:RPC vs Mouse:RPC	2	1.45935e-90	0.526276	0.148	0.048	1.9602e-86
Coro1b	LGS:RPC vs Mouse:RPC	2	1.57641e-90	0.633281	0.269	0.133	2.11743e-86
Cep55	LGS:RPC vs Mouse:RPC	8	1.60087e-90	-0.522459	0.023	0.115	2.15029e-86
Nmt2	LGS:RPC vs Mouse:RPC	5	1.73099e-90	-0.573479	0.039	0.146	2.32507e-86
Usp7	LGS:RPC vs Mouse:RPC	2	1.78657e-90	0.510396	0.175	0.065	2.39973e-86
ODC1	LGS:RPC vs Mouse:RPC	5	1.82134e-90	-0.380454	0	0.06	2.44642e-86
Scmh1	LGS:RPC vs Mouse:RPC	5	2.09057e-90	-0.56128	0.028	0.125	2.80805e-86
Kcnmb4	LGS:RPC vs Mouse:RPC	1	2.26581e-90	0.360521	0.094	0.021	3.04344e-86
Kansl1l	LGS:RPC vs Mouse:RPC	3	2.79558e-90	0.571961	0.174	0.064	3.75502e-86
Inip	LGS:RPC vs Mouse:RPC	6	2.86032e-90	-0.561381	0.029	0.128	3.84199e-86
Tox	LGS:RPC vs Mouse:RPC	6	2.99971e-90	-0.615169	0.204	0.347	4.02921e-86
Serp2	LGS:RPC vs Mouse:RPC	2	3.6048e-90	0.459574	0.097	0.021	4.84197e-86
Nrp1	LGS:RPC vs Mouse:RPC	5	3.92808e-90	-0.510272	0.002	0.071	5.27619e-86
Cpne5	LGS:RPC vs Mouse:RPC	6	6.0241e-90	-0.422245	0.003	0.074	8.09157e-86
R3hdm1	LGS:RPC vs Mouse:RPC	5	6.48276e-90	-0.633953	0.137	0.268	8.70765e-86
Armc10	LGS:RPC vs Mouse:RPC	6	7.99809e-90	-0.549033	0.022	0.117	1.0743e-85
Cdkal1	LGS:RPC vs Mouse:RPC	5	9.10746e-90	-0.445184	0.005	0.078	1.22331e-85
Shtn1	LGS:RPC vs Mouse:RPC	2	9.86516e-90	0.377063	0.075	0.012	1.32509e-85
Agtrap	LGS:RPC vs Mouse:RPC	5	1.04474e-89	-0.414796	0.002	0.07	1.4033e-85
Pdlim7	LGS:RPC vs Mouse:RPC	6	1.08933e-89	-0.621503	0.087	0.211	1.46319e-85
Aars	LGS:RPC vs Mouse:RPC	6	1.87872e-89	-0.606632	0.108	0.24	2.5235e-85
Tex261	LGS:RPC vs Mouse:RPC	5	1.95372e-89	-0.616469	0.124	0.259	2.62423e-85
Pgbd1	LGS:RPC vs Mouse:RPC	2	2.74734e-89	0.35813	0.081	0.015	3.69023e-85
Dctn2	LGS:RPC vs Mouse:RPC	2	2.78129e-89	0.618661	0.41	0.261	3.73583e-85
Mark3	LGS:RPC vs Mouse:RPC	2	3.46755e-89	0.587595	0.227	0.101	4.65761e-85
TRUB2	LGS:RPC vs Mouse:RPC	5	5.3392e-89	-0.380153	0	0.059	7.17161e-85
Ttc4	LGS:RPC vs Mouse:RPC	5	5.8846e-89	-0.577751	0.039	0.146	7.90419e-85
Rnf214	LGS:RPC vs Mouse:RPC	2	6.3537e-89	0.613308	0.203	0.084	8.53429e-85
Fstl1	LGS:RPC vs Mouse:RPC	6	7.77563e-89	-0.633974	0.069	0.191	1.04442e-84
Bcl7a	LGS:RPC vs Mouse:RPC	5	8.49743e-89	-0.63315	0.102	0.223	1.14137e-84
Cmtr1	LGS:RPC vs Mouse:RPC	2	1.15299e-88	0.430774	0.075	0.012	1.54869e-84
Psma4	LGS:RPC vs Mouse:RPC	1	1.37873e-88	0.525034	0.593	0.463	1.85191e-84
Pdia4	LGS:RPC vs Mouse:RPC	6	1.52534e-88	-0.604633	0.127	0.267	2.04883e-84
Prkch	LGS:RPC vs Mouse:RPC	6	1.612e-88	-0.376923	0	0.061	2.16524e-84
Emc9	LGS:RPC vs Mouse:RPC	2	1.81512e-88	0.396242	0.07	0.011	2.43807e-84
Sike1	LGS:RPC vs Mouse:RPC	5	1.81956e-88	-0.571457	0.036	0.138	2.44403e-84
Camk2g	LGS:RPC vs Mouse:RPC	5	2.65827e-88	-0.401428	0.003	0.07	3.57059e-84
Tmem159	LGS:RPC vs Mouse:RPC	5	2.89735e-88	-0.52973	0.019	0.111	3.89172e-84
Prmt5	LGS:RPC vs Mouse:RPC	5	3.02696e-88	-0.602676	0.076	0.199	4.06581e-84
Cep70	LGS:RPC vs Mouse:RPC	1	3.05426e-88	0.555057	0.188	0.074	4.10248e-84
Golm1	LGS:RPC vs Mouse:RPC	1	3.07101e-88	0.549178	0.199	0.081	4.12497e-84
Rrp7a	LGS:RPC vs Mouse:RPC	5	3.203e-88	-0.569401	0.038	0.141	4.30227e-84
Nup93	LGS:RPC vs Mouse:RPC	1	3.36285e-88	0.617245	0.239	0.111	4.51698e-84
Snx17	LGS:RPC vs Mouse:RPC	6	3.99691e-88	-0.612123	0.132	0.272	5.36865e-84
Pbrm1	LGS:RPC vs Mouse:RPC	5	3.99721e-88	-0.59823	0.252	0.396	5.36905e-84
Camk1	LGS:RPC vs Mouse:RPC	5	4.04417e-88	-0.569263	0.036	0.14	5.43212e-84
Dclre1a	LGS:RPC vs Mouse:RPC	2	4.05561e-88	0.476059	0.135	0.043	5.44749e-84
Trdmt1	LGS:RPC vs Mouse:RPC	2	4.3788e-88	0.385298	0.085	0.017	5.88161e-84
Pnkd	LGS:RPC vs Mouse:RPC	2	5.67966e-88	0.578223	0.224	0.098	7.62892e-84
Atp5d	LGS:RPC vs Mouse:RPC	2	6.58615e-88	0.453997	0.703	0.615	8.84651e-84
Kptn	LGS:RPC vs Mouse:RPC	2	7.0385e-88	0.47464	0.12	0.034	9.45411e-84
Coro1c	LGS:RPC vs Mouse:RPC	6	7.4769e-88	-0.600796	0.092	0.216	1.0043e-83
Pnisr	LGS:RPC vs Mouse:RPC	3	1.03994e-87	0.477245	0.693	0.591	1.39685e-83
Aasdh	LGS:RPC vs Mouse:RPC	2	1.06632e-87	0.423406	0.09	0.019	1.43228e-83
Pqlc2	LGS:RPC vs Mouse:RPC	2	1.42046e-87	0.360525	0.069	0.01	1.90796e-83
Ing5	LGS:RPC vs Mouse:RPC	5	1.5345e-87	-0.415035	0.002	0.069	2.06114e-83
Myh10	LGS:RPC vs Mouse:RPC	1	2.24947e-87	0.624182	0.326	0.18	3.02149e-83
Mex3c	LGS:RPC vs Mouse:RPC	1	2.62892e-87	0.382527	0.106	0.027	3.53116e-83
Ywhaq	LGS:RPC vs Mouse:RPC	8	2.73319e-87	-0.461661	0.531	0.684	3.67122e-83
Cdc42ep3	LGS:RPC vs Mouse:RPC	7	3.04354e-87	0.358188	0.072	0.011	4.08809e-83
Mms22l	LGS:RPC vs Mouse:RPC	6	4.45106e-87	-0.539321	0.024	0.119	5.97866e-83
Emc3	LGS:RPC vs Mouse:RPC	5	4.54858e-87	-0.587643	0.083	0.211	6.10966e-83
Sphkap	LGS:RPC vs Mouse:RPC	3	4.82331e-87	0.351743	0.056	0.006	6.47867e-83
Tcof1	LGS:RPC vs Mouse:RPC	6	5.58107e-87	-0.571979	0.046	0.155	7.49649e-83
Mgea5	LGS:RPC vs Mouse:RPC	5	5.80751e-87	-0.594001	0.048	0.157	7.80064e-83
Bloc1s6	LGS:RPC vs Mouse:RPC	1	5.89097e-87	0.538797	0.209	0.089	7.91275e-83
Kmt2a	LGS:RPC vs Mouse:RPC	2	5.89535e-87	0.595256	0.299	0.155	7.91863e-83
Odf2	LGS:RPC vs Mouse:RPC	6	6.4669e-87	-0.616574	0.091	0.209	8.68634e-83
Cep170	LGS:RPC vs Mouse:RPC	2	7.82202e-87	0.533469	0.175	0.066	1.05065e-82
Arl2	LGS:RPC vs Mouse:RPC	2	9.66389e-87	0.577441	0.191	0.077	1.29805e-82
Arhgap21	LGS:RPC vs Mouse:RPC	1	1.00042e-86	0.50177	0.144	0.047	1.34376e-82
Spats2l	LGS:RPC vs Mouse:RPC	2	1.0802e-86	0.429021	0.086	0.017	1.45092e-82
Acad8	LGS:RPC vs Mouse:RPC	5	1.14144e-86	-0.457614	0.008	0.083	1.53319e-82
Dnaja2	LGS:RPC vs Mouse:RPC	5	1.29985e-86	-0.570531	0.208	0.349	1.74596e-82
Pcid2	LGS:RPC vs Mouse:RPC	1	1.71096e-86	0.522205	0.179	0.069	2.29816e-82
Ndufc2	LGS:RPC vs Mouse:RPC	2	2.03336e-86	0.437101	0.668	0.581	2.73121e-82
Sat1	LGS:RPC vs Mouse:RPC	4	2.25639e-86	-0.889361	0.161	0.267	3.03079e-82
Ctnnd1	LGS:RPC vs Mouse:RPC	1	2.35816e-86	0.527173	0.146	0.049	3.16747e-82
Ubqln2	LGS:RPC vs Mouse:RPC	5	2.72567e-86	-0.610542	0.094	0.22	3.66112e-82
Ncapg2	LGS:RPC vs Mouse:RPC	8	3.01752e-86	0.616576	0.209	0.091	4.05313e-82
Vrk3	LGS:RPC vs Mouse:RPC	5	3.17995e-86	-0.578045	0.064	0.183	4.27131e-82
Mbnl1	LGS:RPC vs Mouse:RPC	3	4.99089e-86	0.383322	0.096	0.023	6.70377e-82
Micu1	LGS:RPC vs Mouse:RPC	7	6.86189e-86	0.624703	0.252	0.121	9.21689e-82
Rpn2	LGS:RPC vs Mouse:RPC	6	9.70196e-86	-0.567722	0.238	0.381	1.30317e-81
Pycard	LGS:RPC vs Mouse:RPC	5	1.2107e-85	-0.435634	0.003	0.068	1.62622e-81
Prkx	LGS:RPC vs Mouse:RPC	2	1.21534e-85	0.427778	0.113	0.031	1.63244e-81
MAP4-like	LGS:RPC vs Mouse:RPC	5	1.32957e-85	-0.411991	0.004	0.074	1.78588e-81
Aldh9a1	LGS:RPC vs Mouse:RPC	1	1.73145e-85	0.547543	0.19	0.076	2.32569e-81
Ssu72	LGS:RPC vs Mouse:RPC	7	2.37464e-85	0.583848	0.434	0.28	3.18962e-81
Golt1b	LGS:RPC vs Mouse:RPC	5	2.61544e-85	-0.57644	0.045	0.145	3.51306e-81
Chn1	LGS:RPC vs Mouse:RPC	7	2.79436e-85	0.376476	0.107	0.029	3.75339e-81
Gspt1	LGS:RPC vs Mouse:RPC	2	3.19522e-85	0.592932	0.432	0.283	4.29183e-81
Rabggtb	LGS:RPC vs Mouse:RPC	5	3.96145e-85	-0.595569	0.075	0.193	5.32102e-81
Nudt14	LGS:RPC vs Mouse:RPC	5	4.07846e-85	-0.424557	0.005	0.075	5.47818e-81
Slc48a1	LGS:RPC vs Mouse:RPC	5	4.12671e-85	-0.510937	0.022	0.115	5.54299e-81
PLEKHB2	LGS:RPC vs Mouse:RPC	5	4.73653e-85	-0.362218	0	0.057	6.3621e-81
Med9	LGS:RPC vs Mouse:RPC	5	5.15911e-85	-0.584981	0.06	0.175	6.92972e-81
Knstrn	LGS:RPC vs Mouse:RPC	8	5.86954e-85	-0.663352	0.145	0.263	7.88397e-81
Tsg101	LGS:RPC vs Mouse:RPC	5	6.07619e-85	-0.597134	0.139	0.272	8.16154e-81
Lemd3	LGS:RPC vs Mouse:RPC	2	6.8897e-85	0.352471	0.081	0.016	9.25424e-81
Ldb2	LGS:RPC vs Mouse:RPC	5	7.86912e-85	-0.412557	0.003	0.068	1.05698e-80
Nol7	LGS:RPC vs Mouse:RPC	6	9.60521e-85	-0.475887	0.362	0.525	1.29017e-80
Cenpq	LGS:RPC vs Mouse:RPC	8	1.00617e-84	-0.582343	0.105	0.232	1.35149e-80
Ctbp2	LGS:RPC vs Mouse:RPC	3	1.24171e-84	0.584875	0.253	0.122	1.66787e-80
Six6	LGS:RPC vs Mouse:RPC	7	1.31723e-84	-0.4863	0.481	0.611	1.76931e-80
Adrm1	LGS:RPC vs Mouse:RPC	1	1.32046e-84	0.592749	0.3	0.158	1.77364e-80
NCBP3-like	LGS:RPC vs Mouse:RPC	5	1.53663e-84	-0.413535	0.003	0.069	2.064e-80
Pbdc1	LGS:RPC vs Mouse:RPC	6	1.57245e-84	-0.570275	0.236	0.386	2.11211e-80
Kpna4	LGS:RPC vs Mouse:RPC	1	1.82586e-84	0.579493	0.254	0.123	2.4525e-80
Tamm41	LGS:RPC vs Mouse:RPC	6	2.76928e-84	-0.413917	0.005	0.076	3.7197e-80
Eif4b	LGS:RPC vs Mouse:RPC	2	4.71305e-84	0.595864	0.296	0.155	6.33057e-80
Itgb5	LGS:RPC vs Mouse:RPC	8	4.8527e-84	0.697193	0.229	0.136	6.51814e-80
Sdhaf2	LGS:RPC vs Mouse:RPC	2	6.85806e-84	0.605446	0.21	0.093	9.21175e-80
Stk17b	LGS:RPC vs Mouse:RPC	6	9.59856e-84	-0.409222	0.008	0.078	1.28928e-79
Etfb	LGS:RPC vs Mouse:RPC	1	1.07135e-83	0.594231	0.389	0.234	1.43904e-79
Rmi2	LGS:RPC vs Mouse:RPC	6	1.11598e-83	-0.374806	0	0.058	1.49899e-79
MIA3-containing	LGS:RPC vs Mouse:RPC	5	1.19197e-83	-0.46924	0.011	0.089	1.60106e-79
[truncated: 13,556 more rows]

## Sheet: Motif
TFs	Motif	p_val	avg_diff	pct.1	pct.2	p_val_adj	tag	RNA::TAG_NEW	RNA::avg_log2FC	RNA::p_val_adj
Bdp1	M01796	0	1.00586	0.914	0.729	0	LGS13:Cone:>:Mouse:Cone	LGS13:Cone:>:Mouse:Cone	1.01842	1.23738e-139
Klf12	M03915	0	1.05642	0.946	0.677	0	LGS13:Cone:>:Mouse:Cone	LGS13:Cone:>:Mouse:Cone	0.543376	1.3321e-67
Mycn	M01808	0	1.60424	0.64	0.308	0	Mouse:Cone:>:LGS13:Cone	Mouse:Cone:>:LGS13:Cone	-0.668646	5.6381e-55
Neurod1	M09997	3.4103e-220	2.04591	0.722	0.491	1.55442e-216	Mouse:Cone:>:LGS13:Cone	Mouse:Cone:>:LGS13:Cone	-1.91351	0
Neurod1	M09701	7.47209e-257	2.07306	0.756	0.506	3.40578e-253	Mouse:Cone:>:LGS13:Cone	Mouse:Cone:>:LGS13:Cone	-1.91351	0
Neurod1	M10304	3.4103e-220	2.04591	0.722	0.491	1.55442e-216	Mouse:Cone:>:LGS13:Cone	Mouse:Cone:>:LGS13:Cone	-1.91351	0
Neurod1	M01287	0	1.6639	0.795	0.419	0	Mouse:Cone:>:LGS13:Cone	Mouse:Cone:>:LGS13:Cone	-1.91351	0
Neurod1	M09776	3.00219e-238	2.05543	0.776	0.566	1.3684e-234	Mouse:Cone:>:LGS13:Cone	Mouse:Cone:>:LGS13:Cone	-1.91351	0
Usf1	M01034	0	1.0419	0.928	0.718	0	LGS13:Cone:>:Mouse:Cone	LGS13:Cone:>:Mouse:Cone	0.367956	1.68691e-56
Zic3	M03931	0	1.42092	0.829	0.368	0	LGS13:Cone:>:Mouse:Cone	LGS13:Cone:>:Mouse:Cone	0.77595	1.26501e-98
Zic3	M10417	0	1.21969	0.842	0.496	0	LGS13:Cone:>:Mouse:Cone	LGS13:Cone:>:Mouse:Cone	0.77595	1.26501e-98
Zic3	M10122	0	1.21969	0.842	0.496	0	LGS13:Cone:>:Mouse:Cone	LGS13:Cone:>:Mouse:Cone	0.77595	1.26501e-98
Ascl1	M07422	0	1.23144	0.126	0.053	0	Mouse:Late_RPCs:>:LGS13:Late_RPCs	Mouse:Late_RPCs:>:LGS13:Late_RPCs	-1.75999	0
Fos	M00926	3.1582e-126	1.32434	0.678	0.649	1.43951e-122	Mouse:Late_RPCs:>:LGS13:Late_RPCs	Mouse:Late_RPCs:>:LGS13:Late_RPCs	-2.29606	0
Fos	M09617	3.29179e-117	1.40537	0.704	0.717	1.5004e-113	Mouse:Late_RPCs:>:LGS13:Late_RPCs	Mouse:Late_RPCs:>:LGS13:Late_RPCs	-2.29606	0
Fos	M00517	6.18968e-108	1.12833	0.666	0.636	2.82126e-104	Mouse:Late_RPCs:>:LGS13:Late_RPCs	Mouse:Late_RPCs:>:LGS13:Late_RPCs	-2.29606	0
Fos	M10238	1.2091e-131	1.4201	0.677	0.654	5.51108e-128	Mouse:Late_RPCs:>:LGS13:Late_RPCs	Mouse:Late_RPCs:>:LGS13:Late_RPCs	-2.29606	0
Fos	M07090	2.10388e-146	1.41777	0.739	0.739	9.58947e-143	Mouse:Late_RPCs:>:LGS13:Late_RPCs	Mouse:Late_RPCs:>:LGS13:Late_RPCs	-2.29606	0
Fos	M08933	1.74733e-78	1.29689	0.714	0.748	7.96431e-75	Mouse:Late_RPCs:>:LGS13:Late_RPCs	Mouse:Late_RPCs:>:LGS13:Late_RPCs	-2.29606	0
Fos	M07600	2.83589e-164	1.3105	0.681	0.626	1.2926e-160	Mouse:Late_RPCs:>:LGS13:Late_RPCs	Mouse:Late_RPCs:>:LGS13:Late_RPCs	-2.29606	0
Fos	M03866	1.9646e-124	1.31939	0.679	0.648	8.95464e-121	Mouse:Late_RPCs:>:LGS13:Late_RPCs	Mouse:Late_RPCs:>:LGS13:Late_RPCs	-2.29606	0
Fos	M02280	1.56457e-133	1.27575	0.669	0.637	7.1313e-130	Mouse:Late_RPCs:>:LGS13:Late_RPCs	Mouse:Late_RPCs:>:LGS13:Late_RPCs	-2.29606	0
Fos	M08946	1.68688e-78	1.08896	0.669	0.68	7.68878e-75	Mouse:Late_RPCs:>:LGS13:Late_RPCs	Mouse:Late_RPCs:>:LGS13:Late_RPCs	-2.29606	0
Fos	M09924	6.84614e-112	1.28738	0.679	0.665	3.12047e-108	Mouse:Late_RPCs:>:LGS13:Late_RPCs	Mouse:Late_RPCs:>:LGS13:Late_RPCs	-2.29606	0
Fos	M08925	5.22684e-80	1.30134	0.705	0.74	2.3824e-76	Mouse:Late_RPCs:>:LGS13:Late_RPCs	Mouse:Late_RPCs:>:LGS13:Late_RPCs	-2.29606	0
Fos	M08942	8.21754e-69	1.23171	0.713	0.763	3.74555e-65	Mouse:Late_RPCs:>:LGS13:Late_RPCs	Mouse:Late_RPCs:>:LGS13:Late_RPCs	-2.29606	0
Fosb	M10235	1.28388e-104	1.33485	0.694	0.707	5.85193e-101	Mouse:Late_RPCs:>:LGS13:Late_RPCs	Mouse:Late_RPCs:>:LGS13:Late_RPCs	-1.17976	8.62161e-208
Fosb	M00926	3.1582e-126	1.32434	0.678	0.649	1.43951e-122	Mouse:Late_RPCs:>:LGS13:Late_RPCs	Mouse:Late_RPCs:>:LGS13:Late_RPCs	-1.17976	8.62161e-208
Fosb	M08920	1.65011e-47	1.12509	0.699	0.762	7.52122e-44	Mouse:Late_RPCs:>:LGS13:Late_RPCs	Mouse:Late_RPCs:>:LGS13:Late_RPCs	-1.17976	8.62161e-208
Fosb	M09614	1.74517e-120	1.38189	0.701	0.697	7.95448e-117	Mouse:Late_RPCs:>:LGS13:Late_RPCs	Mouse:Late_RPCs:>:LGS13:Late_RPCs	-1.17976	8.62161e-208
Fosb	M08936	3.42601e-68	1.20093	0.7	0.744	1.56158e-64	Mouse:Late_RPCs:>:LGS13:Late_RPCs	Mouse:Late_RPCs:>:LGS13:Late_RPCs	-1.17976	8.62161e-208
Fosb	M00517	6.18968e-108	1.12833	0.666	0.636	2.82126e-104	Mouse:Late_RPCs:>:LGS13:Late_RPCs	Mouse:Late_RPCs:>:LGS13:Late_RPCs	-1.17976	8.62161e-208
Fosb	M09921	9.66252e-108	1.34248	0.693	0.704	4.40418e-104	Mouse:Late_RPCs:>:LGS13:Late_RPCs	Mouse:Late_RPCs:>:LGS13:Late_RPCs	-1.17976	8.62161e-208
Jun	M08942	8.21754e-69	1.23171	0.713	0.763	3.74555e-65	Mouse:Late_RPCs:>:LGS13:Late_RPCs	Mouse:Late_RPCs:>:LGS13:Late_RPCs	-1.06813	0
Jun	M10275	4.13424e-134	1.39189	0.672	0.645	1.88439e-130	Mouse:Late_RPCs:>:LGS13:Late_RPCs	Mouse:Late_RPCs:>:LGS13:Late_RPCs	-1.06813	0
Jun	M03866	1.9646e-124	1.31939	0.679	0.648	8.95464e-121	Mouse:Late_RPCs:>:LGS13:Late_RPCs	Mouse:Late_RPCs:>:LGS13:Late_RPCs	-1.06813	0
Jun	M08944	2.19382e-83	1.01931	0.685	0.688	9.99943e-80	Mouse:Late_RPCs:>:LGS13:Late_RPCs	Mouse:Late_RPCs:>:LGS13:Late_RPCs	-1.06813	0
Jun	M00926	3.1582e-126	1.32434	0.678	0.649	1.43951e-122	Mouse:Late_RPCs:>:LGS13:Late_RPCs	Mouse:Late_RPCs:>:LGS13:Late_RPCs	-1.06813	0
Jun	M07076	2.53884e-182	1.02089	0.695	0.615	1.1572e-178	Mouse:Late_RPCs:>:LGS13:Late_RPCs	Mouse:Late_RPCs:>:LGS13:Late_RPCs	-1.06813	0
Jun	M00517	6.18968e-108	1.12833	0.666	0.636	2.82126e-104	Mouse:Late_RPCs:>:LGS13:Late_RPCs	Mouse:Late_RPCs:>:LGS13:Late_RPCs	-1.06813	0
Jun	M09965	4.19033e-140	1.45179	0.705	0.693	1.90995e-136	Mouse:Late_RPCs:>:LGS13:Late_RPCs	Mouse:Late_RPCs:>:LGS13:Late_RPCs	-1.06813	0
Jun	M08938	1.18065e-78	1.28815	0.716	0.76	5.38142e-75	Mouse:Late_RPCs:>:LGS13:Late_RPCs	Mouse:Late_RPCs:>:LGS13:Late_RPCs	-1.06813	0
Jun	M02280	1.56457e-133	1.27575	0.669	0.637	7.1313e-130	Mouse:Late_RPCs:>:LGS13:Late_RPCs	Mouse:Late_RPCs:>:LGS13:Late_RPCs	-1.06813	0
Jun	M07102	1.45528e-190	1.47702	0.719	0.668	6.63319e-187	Mouse:Late_RPCs:>:LGS13:Late_RPCs	Mouse:Late_RPCs:>:LGS13:Late_RPCs	-1.06813	0
Jun	M08940	5.33954e-54	1.21234	0.71	0.777	2.43376e-50	Mouse:Late_RPCs:>:LGS13:Late_RPCs	Mouse:Late_RPCs:>:LGS13:Late_RPCs	-1.06813	0
Jun	M08936	3.42601e-68	1.20093	0.7	0.744	1.56158e-64	Mouse:Late_RPCs:>:LGS13:Late_RPCs	Mouse:Late_RPCs:>:LGS13:Late_RPCs	-1.06813	0
Junb	M08922	1.03654e-64	1.18309	0.713	0.765	4.72455e-61	Mouse:Late_RPCs:>:LGS13:Late_RPCs	Mouse:Late_RPCs:>:LGS13:Late_RPCs	-1.89894	0
Junb	M08925	5.22684e-80	1.30134	0.705	0.74	2.3824e-76	Mouse:Late_RPCs:>:LGS13:Late_RPCs	Mouse:Late_RPCs:>:LGS13:Late_RPCs	-1.89894	0
Junb	M10273	1.90932e-112	1.34417	0.704	0.711	8.70268e-109	Mouse:Late_RPCs:>:LGS13:Late_RPCs	Mouse:Late_RPCs:>:LGS13:Late_RPCs	-1.89894	0
Junb	M09963	1.48392e-182	1.44492	0.693	0.64	6.76371e-179	Mouse:Late_RPCs:>:LGS13:Late_RPCs	Mouse:Late_RPCs:>:LGS13:Late_RPCs	-1.89894	0
Junb	M00926	3.1582e-126	1.32434	0.678	0.649	1.43951e-122	Mouse:Late_RPCs:>:LGS13:Late_RPCs	Mouse:Late_RPCs:>:LGS13:Late_RPCs	-1.89894	0
Junb	M07103	5.00308e-130	1.46624	0.714	0.711	2.2804e-126	Mouse:Late_RPCs:>:LGS13:Late_RPCs	Mouse:Late_RPCs:>:LGS13:Late_RPCs	-1.89894	0
Junb	M08926	5.41282e-55	1.04443	0.673	0.707	2.46716e-51	Mouse:Late_RPCs:>:LGS13:Late_RPCs	Mouse:Late_RPCs:>:LGS13:Late_RPCs	-1.89894	0
Junb	M09631	3.04949e-172	1.47441	0.684	0.633	1.38996e-168	Mouse:Late_RPCs:>:LGS13:Late_RPCs	Mouse:Late_RPCs:>:LGS13:Late_RPCs	-1.89894	0
Junb	M08923	2.12464e-53	1.1479	0.721	0.783	9.68411e-50	Mouse:Late_RPCs:>:LGS13:Late_RPCs	Mouse:Late_RPCs:>:LGS13:Late_RPCs	-1.89894	0
Junb	M03551	3.83807e-137	1.20966	0.694	0.67	1.74939e-133	Mouse:Late_RPCs:>:LGS13:Late_RPCs	Mouse:Late_RPCs:>:LGS13:Late_RPCs	-1.89894	0
Junb	M08920	1.65011e-47	1.12509	0.699	0.762	7.52122e-44	Mouse:Late_RPCs:>:LGS13:Late_RPCs	Mouse:Late_RPCs:>:LGS13:Late_RPCs	-1.89894	0
Junb	M00517	6.18968e-108	1.12833	0.666	0.636	2.82126e-104	Mouse:Late_RPCs:>:LGS13:Late_RPCs	Mouse:Late_RPCs:>:LGS13:Late_RPCs	-1.89894	0
Junb	M08944	2.19382e-83	1.01931	0.685	0.688	9.99943e-80	Mouse:Late_RPCs:>:LGS13:Late_RPCs	Mouse:Late_RPCs:>:LGS13:Late_RPCs	-1.89894	0
Jund	M10274	1.7894e-171	1.50146	0.7	0.661	8.15608e-168	Mouse:Late_RPCs:>:LGS13:Late_RPCs	Mouse:Late_RPCs:>:LGS13:Late_RPCs	-2.68563	0
Jund	M09964	1.65587e-186	1.52272	0.699	0.647	7.54745e-183	Mouse:Late_RPCs:>:LGS13:Late_RPCs	Mouse:Late_RPCs:>:LGS13:Late_RPCs	-2.68563	0
Jund	M00926	3.1582e-126	1.32434	0.678	0.649	1.43951e-122	Mouse:Late_RPCs:>:LGS13:Late_RPCs	Mouse:Late_RPCs:>:LGS13:Late_RPCs	-2.68563	0
Jund	M00517	6.18968e-108	1.12833	0.666	0.636	2.82126e-104	Mouse:Late_RPCs:>:LGS13:Late_RPCs	Mouse:Late_RPCs:>:LGS13:Late_RPCs	-2.68563	0
Jund	M08933	1.74733e-78	1.29689	0.714	0.748	7.96431e-75	Mouse:Late_RPCs:>:LGS13:Late_RPCs	Mouse:Late_RPCs:>:LGS13:Late_RPCs	-2.68563	0
Jund	M08934	1.44843e-66	1.12139	0.714	0.758	6.60195e-63	Mouse:Late_RPCs:>:LGS13:Late_RPCs	Mouse:Late_RPCs:>:LGS13:Late_RPCs	-2.68563	0
Jund	M07104	7.2464e-98	1.36927	0.723	0.759	3.30291e-94	Mouse:Late_RPCs:>:LGS13:Late_RPCs	Mouse:Late_RPCs:>:LGS13:Late_RPCs	-2.68563	0
Jund	M08929	7.57756e-38	1.01114	0.718	0.787	3.45385e-34	Mouse:Late_RPCs:>:LGS13:Late_RPCs	Mouse:Late_RPCs:>:LGS13:Late_RPCs	-2.68563	0
Jund	M08931	2.77519e-74	1.27194	0.723	0.77	1.26493e-70	Mouse:Late_RPCs:>:LGS13:Late_RPCs	Mouse:Late_RPCs:>:LGS13:Late_RPCs	-2.68563	0
Neurog2	M04183	0	1.53918	0.041	0.015	0	Mouse:Late_RPCs:>:LGS13:Late_RPCs	Mouse:Late_RPCs:>:LGS13:Late_RPCs	-0.484286	3.29483e-47
Neurog2	M10315	0	2.52849	0.048	0.021	0	Mouse:Late_RPCs:>:LGS13:Late_RPCs	Mouse:Late_RPCs:>:LGS13:Late_RPCs	-0.484286	3.29483e-47
Neurog2	M07609	0	1.75549	0.137	0.053	0	Mouse:Late_RPCs:>:LGS13:Late_RPCs	Mouse:Late_RPCs:>:LGS13:Late_RPCs	-0.484286	3.29483e-47
Tcf3	M02927	0	2.19798	0.019	0.007	0	Mouse:Late_RPCs:>:LGS13:Late_RPCs	Mouse:Late_RPCs:>:LGS13:Late_RPCs	-0.635584	9.4903e-145
Tcf3	M00065	0	2.37909	0.018	0.006	0	Mouse:Late_RPCs:>:LGS13:Late_RPCs	Mouse:Late_RPCs:>:LGS13:Late_RPCs	-0.635584	9.4903e-145
Tcf3	M00066	0	2.63379	0.021	0.009	0	Mouse:Late_RPCs:>:LGS13:Late_RPCs	Mouse:Late_RPCs:>:LGS13:Late_RPCs	-0.635584	9.4903e-145
Tead2	M10396	0	1.56147	0.962	0.842	0	Mouse:Late_RPCs:>:LGS13:Late_RPCs	Mouse:Late_RPCs:>:LGS13:Late_RPCs	-1.01091	2.14395e-229
Tead2	M09788	0	1.86745	0.969	0.85	0	Mouse:Late_RPCs:>:LGS13:Late_RPCs	Mouse:Late_RPCs:>:LGS13:Late_RPCs	-1.01091	2.14395e-229
Vax2	M01327	0	1.47486	0.995	0.962	0	LGS13:Late_RPCs:>:Mouse:Late_RPCs	LGS13:Late_RPCs:>:Mouse:Late_RPCs	1.11812	0
Vax2	M04447	0	1.29841	0.98	0.908	0	LGS13:Late_RPCs:>:Mouse:Late_RPCs	LGS13:Late_RPCs:>:Mouse:Late_RPCs	1.11812	0
Ascl1	M09865	3.35127e-106	1.10335	0.982	0.964	1.52751e-102	Mouse:Photo_BC:>:LGS13:Photo_BC	Mouse:Photo_BC:>:LGS13:Photo_BC	-2.88747	6.38891e-236
Hbp1	M08899	7.731e-118	1.10065	0.773	0.514	3.52379e-114	Mouse:Photo_BC:>:LGS13:Photo_BC	Mouse:Photo_BC:>:LGS13:Photo_BC	-0.807868	3.05165e-49
Hdac2	M04866	2.53691e-209	1.00472	0.147	0.029	1.15632e-205	Mouse:Photo_BC:>:LGS13:Photo_BC	Mouse:Photo_BC:>:LGS13:Photo_BC	-0.577888	3.34486e-70
Parp1	M02027	3.27316e-220	1.02444	0.358	0.097	1.49191e-216	Mouse:Photo_BC:>:LGS13:Photo_BC	Mouse:Photo_BC:>:LGS13:Photo_BC	-0.476682	4.37535e-28
Rax	M04435	2.90305e-221	1.59369	0.935	0.726	1.32321e-217	Mouse:Photo_BC:>:LGS13:Photo_BC	Mouse:Photo_BC:>:LGS13:Photo_BC	-1.26111	7.92965e-124
Rax	M01389	3.22482e-177	1.35247	0.928	0.775	1.46987e-173	Mouse:Photo_BC:>:LGS13:Photo_BC	Mouse:Photo_BC:>:LGS13:Photo_BC	-1.26111	7.92965e-124
Sox11	M08899	7.731e-118	1.10065	0.773	0.514	3.52379e-114	Mouse:Photo_BC:>:LGS13:Photo_BC	Mouse:Photo_BC:>:LGS13:Photo_BC	-2.4263	7.94728e-155
Sox4	M08899	7.731e-118	1.10065	0.773	0.514	3.52379e-114	Mouse:Photo_BC:>:LGS13:Photo_BC	Mouse:Photo_BC:>:LGS13:Photo_BC	-2.43426	0
Sox9	M04004	1.3951e-100	1.00093	0.732	0.488	6.35885e-97	Mouse:Photo_BC:>:LGS13:Photo_BC	Mouse:Photo_BC:>:LGS13:Photo_BC	-1.25831	6.04842e-53
Sox9	M08899	7.731e-118	1.10065	0.773	0.514	3.52379e-114	Mouse:Photo_BC:>:LGS13:Photo_BC	Mouse:Photo_BC:>:LGS13:Photo_BC	-1.25831	6.04842e-53
Tcf12	M02018	3.39854e-143	1.14005	0.749	0.445	1.54906e-139	Mouse:Photo_BC:>:LGS13:Photo_BC	Mouse:Photo_BC:>:LGS13:Photo_BC	-0.443469	2.38932e-27
Tcf3	M04190	8.73289e-184	1.18866	0.614	0.25	3.98045e-180	Mouse:Photo_BC:>:LGS13:Photo_BC	Mouse:Photo_BC:>:LGS13:Photo_BC	-0.520708	7.6426e-46
Tcf3	M02823	1.07121e-173	1.10307	0.595	0.262	4.88257e-170	Mouse:Photo_BC:>:LGS13:Photo_BC	Mouse:Photo_BC:>:LGS13:Photo_BC	-0.520708	7.6426e-46
Tcf3	M07477	3.93774e-222	1.40782	0.725	0.31	1.79482e-218	Mouse:Photo_BC:>:LGS13:Photo_BC	Mouse:Photo_BC:>:LGS13:Photo_BC	-0.520708	7.6426e-46
Tead2	M00695	1.12747e-279	1.06729	0.206	0.037	5.13902e-276	Mouse:Photo_BC:>:LGS13:Photo_BC	Mouse:Photo_BC:>:LGS13:Photo_BC	-1.32168	6.54304e-89
Sox9	M08838	5.83782e-71	1.05908	0.936	0.674	2.66088e-67	Mouse:Late_NG:>:LGS13:Late_NG	Mouse:Late_NG:>:LGS13:Late_NG	-0.503741	6.232e-23
Sox9	M10374	1.54719e-70	1.16277	0.977	0.759	7.0521e-67	Mouse:Late_NG:>:LGS13:Late_NG	Mouse:Late_NG:>:LGS13:Late_NG	-0.503741	6.232e-23
Sox9	M10070	1.54719e-70	1.16277	0.977	0.759	7.0521e-67	Mouse:Late_NG:>:LGS13:Late_NG	Mouse:Late_NG:>:LGS13:Late_NG	-0.503741	6.232e-23
Tcf15	M08787	5.01536e-91	1.06475	0.829	0.693	2.286e-87	LGS13:Late_NG:>:Mouse:Late_NG	LGS13:Late_NG:>:Mouse:Late_NG	0.470048	1.87229e-66
Tead2	M09788	2.86933e-128	1.29276	0.584	0.253	1.30784e-124	Mouse:Late_NG:>:LGS13:Late_NG	Mouse:Late_NG:>:LGS13:Late_NG	-1.18075	4.56789e-88
Tead2	M10396	5.21723e-98	1.04836	0.583	0.296	2.37802e-94	Mouse:Late_NG:>:LGS13:Late_NG	Mouse:Late_NG:>:LGS13:Late_NG	-1.18075	4.56789e-88
Esrrg	M04461	0	1.57539	0.934	0.626	0	LGS13:Cone:>:Mouse:Rod	LGS13:Cone:>:Mouse:Rod	0.391125	1.04219e-170
Isl2	M04379	0	1.25291	0.667	0.223	0	LGS13:Cone:>:Mouse:Rod	LGS13:Cone:>:Mouse:Rod	0.925756	6.46728e-249
Isl2	M01328	0	1.06913	0.493	0.177	0	LGS13:Cone:>:Mouse:Rod	LGS13:Cone:>:Mouse:Rod	0.925756	6.46728e-249
Klf12	M03915	0	1.02408	0.946	0.608	0	LGS13:Cone:>:Mouse:Rod	LGS13:Cone:>:Mouse:Rod	0.537337	1.52256e-215
Lhx3	M10283	0	1.0825	0.203	0.106	0	LGS13:Cone:>:Mouse:Rod	LGS13:Cone:>:Mouse:Rod	1.34236	0
Lhx3	M00510	0	1.10945	0.278	0.125	0	LGS13:Cone:>:Mouse:Rod	LGS13:Cone:>:Mouse:Rod	1.34236	0
Nfib	M04057	0	1.26844	0.234	0.04	0	Mouse:Rod:>:LGS13:Cone	Mouse:Rod:>:LGS13:Cone	-0.946148	1.84632e-139
Rxrg	M00965	0	1.28555	0.94	0.721	0	LGS13:Cone:>:Mouse:Rod	LGS13:Cone:>:Mouse:Rod	1.47981	0
Rxrg	M08965	0	1.21766	0.881	0.534	0	LGS13:Cone:>:Mouse:Rod	LGS13:Cone:>:Mouse:Rod	1.47981	0
Rxrg	M07280	0	1.0431	0.933	0.749	0	LGS13:Cone:>:Mouse:Rod	LGS13:Cone:>:Mouse:Rod	1.47981	0
Thrb	M04495	0	1.04288	0.869	0.564	0	LGS13:Cone:>:Mouse:Rod	LGS13:Cone:>:Mouse:Rod	2.10436	0
Thrb	M04497	0	1.15879	0.854	0.511	0	LGS13:Cone:>:Mouse:Rod	LGS13:Cone:>:Mouse:Rod	2.10436	0
Thrb	M02119	0	1.79654	0.957	0.66	0	LGS13:Cone:>:Mouse:Rod	LGS13:Cone:>:Mouse:Rod	2.10436	0
Vax2	M01327	0	1.30181	0.272	0.122	0	LGS13:Cone:>:Mouse:Rod	LGS13:Cone:>:Mouse:Rod	0.575975	4.6851e-278
Vsx1	M08015	0	1.11733	0.327	0.108	0	LGS13:Cone:>:Mouse:Rod	LGS13:Cone:>:Mouse:Rod	0.353095	3.51449e-111
Vsx1	M08981	0	1.31061	0.51	0.196	0	LGS13:Cone:>:Mouse:Rod	LGS13:Cone:>:Mouse:Rod	0.353095	3.51449e-111
Zic3	M04594	0	1.15618	0.746	0.333	0	LGS13:Cone:>:Mouse:Rod	LGS13:Cone:>:Mouse:Rod	0.930018	0
Zic3	M02941	0	1.05569	0.688	0.326	0	LGS13:Cone:>:Mouse:Rod	LGS13:Cone:>:Mouse:Rod	0.930018	0
Zic3	M10122	0	1.69701	0.842	0.347	0	LGS13:Cone:>:Mouse:Rod	LGS13:Cone:>:Mouse:Rod	0.930018	0
Zic3	M03931	0	1.54821	0.829	0.32	0	LGS13:Cone:>:Mouse:Rod	LGS13:Cone:>:Mouse:Rod	0.930018	0
Zic3	M10417	0	1.69701	0.842	0.347	0	LGS13:Cone:>:Mouse:Rod	LGS13:Cone:>:Mouse:Rod	0.930018	0

## Sheet: 13LGS_Motif
Motif_name	Gene_names	cluster	p_val	avg_diff	pct.1	pct.2	p_val_adj
M10406	Thra	LGS13:Cone	0	4.61829	0.974	0.256	0
M04482	Rara	LGS13:Cone	0	3.83553	0.974	0.283	0
M04486	Rarg	LGS13:Cone	0	3.70319	0.975	0.284	0
M07353	Tcf3	LGS13:Cone	0	3.5146	0.987	0.333	0
M07371	Zeb1	LGS13:Cone	0	3.50014	0.989	0.335	0
M03582	Twist1	LGS13:Cone	0	3.23016	0.986	0.339	0
M03919	Snai2	LGS13:Cone	0	3.44751	0.988	0.342	0
M10064	Snai2	LGS13:Cone	0	3.34878	0.986	0.343	0
M07430	Snai1	LGS13:Cone	0	3.30098	0.986	0.346	0
M09822	Zeb1	LGS13:Cone	0	3.21412	0.986	0.346	0
M04418	Otx1	LGS13:Cone	0	7.85692	1	0.368	0
M04422	Otx1	LGS13:Cone	0	7.74887	1	0.368	0
M02018	Tcf12	LGS13:Cone	0	3.0422	0.981	0.35	0
M03810	Nr1i2,Rxra,Rxrb	LGS13:Cone	0	2.88237	0.966	0.335	0
M03831	Myf6	LGS13:Cone	0	3.0422	0.981	0.35	0
M04420	Otx2	LGS13:Cone	0	7.94407	1	0.369	0
M07394	Snai2	LGS13:Cone	0	2.91935	0.974	0.343	0
M10370	Snai2	LGS13:Cone	0	3.15749	0.983	0.352	0
M00973	Ascl1,Ascl2,Myf5,Myf6,Myod1,Tcf12,Tcf3,Tcf4	LGS13:Cone	0	2.99069	0.978	0.35	0
M04281	Alx4	LGS13:Cone	0	3.22303	0.975	0.35	0
M06790	Zbtb12	LGS13:Cone	0	4.40708	0.995	0.37	0
M07235	Zeb1	LGS13:Cone	0	3.07802	0.978	0.353	0
M04806	Tcf12	LGS13:Cone	0	2.88818	0.976	0.353	0
M03566	Snai1	LGS13:Cone	0	2.93879	0.981	0.359	0
M10117	Zeb1	LGS13:Cone	0	3.04942	0.979	0.358	0
M10414	Zeb1	LGS13:Cone	0	3.04942	0.979	0.358	0
M01343	Pitx3	LGS13:Cone	0	7.67717	1	0.381	0
M01436	Crx	LGS13:Cone	0	8.19556	1	0.381	0
M04421	Otx2	LGS13:Cone	0	7.33001	1	0.381	0
M07352	Crx	LGS13:Cone	0	8.47098	1	0.381	0
M09888	Crx	LGS13:Cone	0	9.56319	1	0.381	0
M10201	Crx	LGS13:Cone	0	9.56319	1	0.381	0
M01719	Otx2	LGS13:Cone	0	7.25758	1	0.382	0
M04305	Dmbx1	LGS13:Cone	0	8.35493	1	0.382	0
M04428	Pitx1	LGS13:Cone	0	7.84889	1	0.382	0
M07081	Crx	LGS13:Cone	0	9.18671	1	0.382	0
M07392	Pitx3	LGS13:Cone	0	5.78044	0.999	0.381	0
M09680	Crx	LGS13:Cone	0	9.79686	1	0.382	0
M01229	Gtf2ird1	LGS13:Cone	0	5.27356	0.998	0.381	0
M01712	Crx	LGS13:Cone	0	6.06939	0.999	0.382	0
M04325	Gsc2	LGS13:Cone	0	8.38876	1	0.383	0
M04326	Gsc	LGS13:Cone	0	8.44765	1	0.383	0
M04429	Pitx3	LGS13:Cone	0	8.52267	1	0.383	0
M04505	Pitx1	LGS13:Cone	0	8.64597	1	0.383	0
M08895	Pitx1,Pitx2,Pitx3	LGS13:Cone	0	8.56768	1	0.383	0
M10021	Otx2	LGS13:Cone	0	9.51456	1	0.383	0
M10338	Pitx1	LGS13:Cone	0	8.47735	1	0.383	0
M01428	Gsc	LGS13:Cone	0	7.15612	1	0.384	0
M03838	Otx1	LGS13:Cone	0	4.48573	0.996	0.38	0
M04423	Otx1	LGS13:Cone	0	4.91832	0.996	0.38	0
M04623	Otx2	LGS13:Cone	0	8.60561	1	0.384	0
M06956	Prrxl1	LGS13:Cone	0	3.27425	0.98	0.364	0
M09628	Tcf12	LGS13:Cone	0	3.01685	0.981	0.365	0
M00623	Crx,Rax	LGS13:Cone	0	4.98069	0.998	0.383	0
M01387	Otx2	LGS13:Cone	0	6.33993	0.999	0.384	0
M01484	Pitx1	LGS13:Cone	0	7.36698	0.999	0.384	0
M04308	Prrxl1	LGS13:Cone	0	3.23246	0.974	0.359	0
M06926	Arx	LGS13:Cone	0	3.19761	0.98	0.365	0
M07055	Pitx1	LGS13:Cone	0	6.11756	0.999	0.384	0
M09672	Zeb1	LGS13:Cone	0	2.95008	0.976	0.362	0
M01366	Otx1	LGS13:Cone	0	6.26797	0.999	0.386	0
M01735	Pitx3	LGS13:Cone	0	4.81217	0.997	0.384	0
M07057	Pitx3	LGS13:Cone	0	4.08952	0.992	0.379	0
M07367	Snai2	LGS13:Cone	0	2.67217	0.971	0.359	0
M04831	Zeb1	LGS13:Cone	0	2.66571	0.968	0.357	0
M00127	Gata1	LGS13:Cone	0	3.88988	0.991	0.381	0
M01724	Thra	LGS13:Cone	0	2.7687	0.965	0.355	0
M02119	Thrb	LGS13:Cone	0	2.64628	0.957	0.347	0
M03795	Nr1h2,Nr1h3,Nr1h4,Rxra	LGS13:Cone	0	2.6121	0.953	0.347	0
M08477	Foxj2,Pitx1	LGS13:Cone	0	3.70893	0.99	0.386	0
M04280	Alx3	LGS13:Cone	0	2.87624	0.966	0.364	0
M06932	Shox2	LGS13:Cone	0	2.94957	0.971	0.369	0
M06984	Rax	LGS13:Cone	0	2.97242	0.972	0.371	0
M01826	Pitx1	LGS13:Cone	0	3.36386	0.986	0.389	0
M06994	Mixl1	LGS13:Cone	0	2.77559	0.966	0.374	0
M08733	Hoxa3,Pitx1	LGS13:Cone	0	3.25559	0.981	0.389	0
M08728	Eomes,Pitx1	LGS13:Cone	0	2.86568	0.973	0.384	0
M04282	Arx	LGS13:Cone	0	2.64065	0.959	0.371	0
M04286	Arx	LGS13:Cone	0	2.60348	0.96	0.372	0
M04177	Mesp1	LGS13:Cone	0	2.43099	0.954	0.367	0
M08501	Hoxb2,Pitx1	LGS13:Cone	0	2.9719	0.975	0.388	0
M08997	Gata3	LGS13:Cone	0	2.68631	0.976	0.391	0
M04432	Prrx1	LGS13:Cone	0	3.07767	0.968	0.384	0
M07107	Rxra	LGS13:Cone	0	2.38178	0.941	0.357	0
M04190	Tcf3	LGS13:Cone	0	2.39798	0.952	0.37	0
M00965	Nr1h2,Nr1h3,Nr1i2,Nr1i3,Nr2f1,Nr2f2,Rara,Rarb,Rarg,Rxra,Rxrb,Rxrg	LGS13:Cone	0	2.30743	0.94	0.359	0
M04285	Alx4	LGS13:Cone	0	2.53983	0.955	0.376	0
M04419	Otx1	LGS13:Cone	0	2.64259	0.956	0.377	0
M04427	Phox2b	LGS13:Cone	0	2.92517	0.963	0.384	0
M06946	Prrx1	LGS13:Cone	0	2.52996	0.957	0.378	0
M06974	Prrx2	LGS13:Cone	0	2.52996	0.957	0.378	0
M06980	Mixl1	LGS13:Cone	0	2.52226	0.956	0.379	0
M10352	Rara	LGS13:Cone	0	2.40771	0.962	0.385	0
M04169	Figla	LGS13:Cone	0	2.48176	0.957	0.382	0
M04174	Id4	LGS13:Cone	0	2.31132	0.954	0.38	0
M09707	Rxra	LGS13:Cone	0	2.47647	0.965	0.391	0
M04461	Esrrg	LGS13:Cone	0	2.28567	0.934	0.361	0
M07477	Tcf3	LGS13:Cone	0	2.26836	0.95	0.379	0
M09708	Rxrg	LGS13:Cone	0	2.35188	0.957	0.386	0
M10362	Rxrg	LGS13:Cone	0	2.40724	0.962	0.393	0
M04457	Esrra	LGS13:Cone	0	2.24172	0.928	0.36	0
M02273	Nr4a2	LGS13:Cone	0	2.2328	0.941	0.374	0
M04191	Tcf4	LGS13:Cone	0	2.23935	0.943	0.377	0
M00766	Nr1h2,Rxra	LGS13:Cone	0	2.14784	0.93	0.365	0
M04430	Prop1	LGS13:Cone	0	2.70583	0.955	0.39	0
M01589	Esrrb	LGS13:Cone	0	2.11687	0.941	0.379	0
M01798	Polr3a	LGS13:Cone	0	2.37308	0.943	0.383	0
M04426	Phox2a	LGS13:Cone	0	2.72987	0.955	0.395	0
M03547	Esr1	LGS13:Cone	0	2.09781	0.937	0.378	0
M03867	Myc	LGS13:Cone	0	2.15562	0.937	0.38	0
M10361	Rxra	LGS13:Cone	0	2.24908	0.95	0.395	0
M00073	Zeb1	LGS13:Cone	0	2.11525	0.939	0.385	0
M06711	Zfp160	LGS13:Cone	0	2.18095	0.936	0.383	0
M00789	Gata1,Gata2,Gata3,Gata4,Gata5,Gata6	LGS13:Cone	0	2.2355	0.949	0.397	0
M03216	Gata6	LGS13:Cone	0	2.2355	0.949	0.397	0
M08765	Gata1	LGS13:Cone	0	2.2355	0.949	0.397	0
M02021	Nr1h2,Rxra	LGS13:Cone	0	2.12672	0.934	0.383	0
M08334	Pitx1	LGS13:Cone	0	2.27961	0.95	0.399	0
M10199	Nr2f2	LGS13:Cone	0	2.10387	0.936	0.387	0
M07247	Clock	LGS13:Cone	0	2.02631	0.935	0.388	0
M07428	Six3	LGS13:Cone	0	2.23093	0.946	0.399	0
M03915	Klf12	LGS13:Cone	0	2.03982	0.946	0.4	0
M01877	Gata2	LGS13:Cone	0	2.26874	0.946	0.403	0
M06736	Zfp354b	LGS13:Cone	0	2.30134	0.946	0.403	0
M08017	Ear2,Nr2f6	LGS13:Cone	0	2.06433	0.935	0.393	0
M01270	Pparg	LGS13:Cone	0	2.09504	0.933	0.393	0
M07280	Nr1h2,Nr1h3,Nr1i2,Nr1i3,Nr2f1,Nr2f2,Rara,Rarb,Rarg,Rxra,Rxrb,Rxrg	LGS13:Cone	0	2.09504	0.933	0.393	0
M04473	Nr2f1	LGS13:Cone	0	2.03316	0.933	0.394	0
M08820	Ascl1	LGS13:Cone	0	2.21464	0.95	0.412	0
M09807	Gata2	LGS13:Cone	0	2.07708	0.939	0.401	0
M01034	Ascl1,Ascl2,Bhlhe40,Bhlhe41,Hand1,Hand2,Max,Mitf,Mxd1,Mxd3,Mxd4,Mxi1,Myc,Mycn,Myf5,Myf6,Myod1,Nhlh1,Tal1,Tal2,Tcf12,Tcf3,Tcf4,Tfeb,Usf1,Usf2	LGS13:Cone	0	2.00333	0.928	0.391	0
M01747	Brf1	LGS13:Cone	0	2.16042	0.929	0.394	0
M08016	Nr2f1	LGS13:Cone	0	2.0318	0.926	0.393	0
M06587	Zfp384	LGS13:Cone	0	2.04797	0.923	0.392	0
M08896	Zeb2	LGS13:Cone	0	2.02725	0.931	0.404	0
M00693	Tcf3	LGS13:Cone	0	2.298	0.934	0.408	0
M03877	Ascl1	LGS13:Cone	0	2.29981	0.944	0.424	0
M04442	Uncx	LGS13:Cone	0	2.08958	0.918	0.418	0
M04444	Uncx	LGS13:Cone	0	2.11651	0.918	0.419	0
M02822	Tfap2e	LGS13:ACHC	0	2.97901	0.836	0.202	0
M01045	Tfap2a	LGS13:ACHC	0	2.93478	0.832	0.202	0
M07231	Tfap2a	LGS13:ACHC	0	3.13875	0.825	0.211	0
M02820	Tfap2b	LGS13:ACHC	0	2.77854	0.834	0.222	0
M09590	Tfap2a	LGS13:ACHC	0	3.25876	0.83	0.218	0
M02821	Tfap2c	LGS13:ACHC	0	2.7005	0.83	0.225	0
M10175	Tfap2a	LGS13:ACHC	0	2.78289	0.814	0.211	0
M04149	Tfap2b	LGS13:ACHC	0	2.56217	0.83	0.233	0
M04150	Tfap2b	LGS13:ACHC	0	2.51581	0.829	0.234	0
M09591	Tfap2c	LGS13:ACHC	0	2.86689	0.813	0.226	0
M04147	Tfap2a	LGS13:ACHC	0	2.44543	0.825	0.241	0
M04065	Pax6	LGS13:ACHC	0	2.90482	0.89	0.307	0
M07137	Tfap2c	LGS13:ACHC	0	2.77946	0.818	0.236	0
M10176	Tfap2c	LGS13:ACHC	0	2.60515	0.802	0.223	0
M02924	Tfap2b	LGS13:ACHC	0	2.1957	0.848	0.269	0
M02819	Tfap2a	LGS13:ACHC	0	2.45401	0.821	0.245	0
M00470	Tfap2c	LGS13:ACHC	0	2.2748	0.792	0.233	0
M04146	Tfap2a	LGS13:ACHC	0	2.21963	0.809	0.252	0
M04156	Tfap2a	LGS13:ACHC	0	2.21808	0.812	0.256	0
M04896	Tfap2a	LGS13:ACHC	0	2.47044	0.797	0.248	0
M04155	Tfap2a	LGS13:ACHC	0	2.17575	0.803	0.256	0
M04152	Tfap2c	LGS13:ACHC	0	2.28665	0.804	0.258	0
M04097	Rfx3	LGS13:ACHC	0	2.38398	0.854	0.332	0
M04101	Rfx5	LGS13:ACHC	0	2.28174	0.85	0.339	0
M04095	Rfx2	LGS13:ACHC	0	2.3466	0.844	0.338	0
M04154	Tfap2c	LGS13:ACHC	0	2.01848	0.797	0.292	0
M04103	Rfx2	LGS13:ACHC	0	2.30806	0.84	0.337	0
M04102	Rfx5	LGS13:ACHC	0	2.1773	0.842	0.342	0
M04099	Rfx4	LGS13:ACHC	0	2.18781	0.83	0.341	0
M04105	Rfx3	LGS13:ACHC	0	2.17697	0.831	0.344	0
M09002	Rfx2	LGS13:ACHC	0	2.00712	0.826	0.353	0
M10070	Sox9	LGS13:MG	0	5.39837	0.999	0.231	0
M10374	Sox9	LGS13:MG	0	5.39837	0.999	0.231	0
M10065	Sox10	LGS13:MG	0	4.82489	0.999	0.237	0
M10371	Sox10	LGS13:MG	0	4.82489	0.999	0.237	0
M08838	Sox9	LGS13:MG	0	4.64365	0.998	0.255	0
M10067	Sox2	LGS13:MG	0	3.16197	0.985	0.295	0
M10068	Sox3	LGS13:MG	0	3.30191	0.985	0.295	0
M07127	Sox3	LGS13:MG	0	3.04038	0.979	0.291	0
M09709	Sox3	LGS13:MG	0	3.10884	0.977	0.296	0
M03138	Sox10	LGS13:MG	0	2.73662	0.986	0.308	0
M10069	Sox4	LGS13:MG	0	3.03034	0.978	0.301	0
M10373	Sox4	LGS13:MG	0	3.03034	0.978	0.301	0
M07128	Sox6	LGS13:MG	0	2.77483	0.967	0.293	0
M08899	Hbp1,Sox1,Sox10,Sox11,Sox13,Sox15,Sox17,Sox18,Sox2,Sox21,Sox3,Sox30,Sox4,Sox5,Sox6,Sox7,Sox8,Sox9,Sry	LGS13:MG	0	2.8732	0.97	0.301	0
M02795	Sox11	LGS13:MG	0	2.68819	0.971	0.303	0
M09787	Sox13	LGS13:MG	0	2.67763	0.963	0.301	0
M07225	Sox2	LGS13:MG	0	2.59277	0.964	0.306	0
M04004	Sox9	LGS13:MG	0	2.42441	0.95	0.297	0
M09819	Sox10	LGS13:MG	0	2.61827	0.965	0.318	0
M01308	Sox4	LGS13:MG	0	2.50413	0.954	0.309	0
M01016	Sox17	LGS13:MG	0	2.16344	0.957	0.315	0
M03847	Sox15	LGS13:MG	0	2.5489	0.961	0.319	0
M07614	Sox4	LGS13:MG	0	2.58598	0.964	0.323	0
M02116	Sox10	LGS13:MG	0	2.42272	0.962	0.322	0
M08971	Sox15	LGS13:MG	0	2.27164	0.944	0.305	0
M01284	Sox9	LGS13:MG	0	2.54375	0.965	0.327	0
M08973	Sox2	LGS13:MG	0	2.3176	0.941	0.303	0
M08972	Sox17	LGS13:MG	0	2.19802	0.938	0.303	0
M07308	Sox2	LGS13:MG	0	2.29722	0.954	0.32	0
M07269	Sox9	LGS13:MG	0	2.45292	0.96	0.328	0
M03803	Sox17	LGS13:MG	0	2.12253	0.961	0.331	0
M03849	Sox4	LGS13:MG	0	2.15177	0.963	0.333	0
M03886	Sox2	LGS13:MG	0	2.20213	0.954	0.326	0
M07432	Sox2	LGS13:MG	0	2.21379	0.951	0.323	0
M08970	Sox10	LGS13:MG	0	2.32483	0.946	0.32	0
M01590	Smad1	LGS13:MG	0	2.14859	0.945	0.324	0
M02902	Sox14,Sox4	LGS13:MG	0	2.23871	0.949	0.331	0
M00410	Sox9	LGS13:MG	0	2.05076	0.931	0.315	0
M01272	Sox2	LGS13:MG	0	2.0996	0.943	0.331	0
M04291	Barx1	LGS13:MG	0	2.51159	0.951	0.343	0
M01162	Nobox	LGS13:MG	0	2.62098	0.968	0.361	0
M07307	Sox18	LGS13:MG	0	2.1843	0.948	0.341	0
M04837	Nanog	LGS13:MG	0	2.04088	0.942	0.339	0
M04091	Pou6f2	LGS13:MG	0	2.82667	0.964	0.367	0
M03888	Sox6	LGS13:MG	0	2.07576	0.938	0.343	0
M10282	Lhx2	LGS13:MG	0	2.69938	0.959	0.37	0
M01479	Pou6f1	LGS13:MG	0	2.59974	0.96	0.372	0
M04327	Gsx1	LGS13:MG	0	2.67343	0.963	0.379	0
M08024	Pou6f2	LGS13:MG	0	2.65763	0.959	0.375	0
M01462	Pou6f1	LGS13:MG	0	2.36225	0.95	0.368	0
M04384	Lbx2	LGS13:MG	0	2.56252	0.95	0.369	0
M04390	Lhx9	LGS13:MG	0	2.62138	0.953	0.374	0
M04433	Prrx2	LGS13:MG	0	2.62138	0.953	0.374	0
M04439	Shox2	LGS13:MG	0	2.62138	0.953	0.374	0
M04294	Barhl1	LGS13:MG	0	2.2455	0.933	0.365	0
M07398	Pou4f2	LGS13:MG	0	2.34589	0.951	0.383	0
M01393	Msx2	LGS13:MG	0	2.23599	0.932	0.365	0
M04316	En1	LGS13:MG	0	2.65532	0.952	0.385	0
M04328	Gsx2	LGS13:MG	0	2.47294	0.949	0.383	0
M04058	Nfix	LGS13:MG	0	3.84752	0.991	0.427	0
M04324	Gbx2	LGS13:MG	0	2.31149	0.937	0.373	0
M04057	Nfib	LGS13:MG	0	3.8192	0.99	0.428	0
M04417	Noto	LGS13:MG	0	2.46491	0.946	0.385	0
M10002	Nfic	LGS13:MG	0	3.23995	0.991	0.43	0
M07411	Nfia	LGS13:MG	0	3.59741	0.988	0.428	0
M09640	Nfic	LGS13:MG	0	3.34902	0.989	0.429	0
M04329	Gbx1	LGS13:MG	0	2.42262	0.945	0.385	0
M04056	Nfia	LGS13:MG	0	3.73227	0.988	0.429	0
M04288	Barhl2	LGS13:MG	0	2.13994	0.93	0.372	0
M09976	Lhx2	LGS13:MG	0	2.37426	0.947	0.389	0
M01331	Isx	LGS13:MG	0	2.1702	0.93	0.374	0
M04381	Isx	LGS13:MG	0	2.42106	0.941	0.385	0
M04431	Prrx1	LGS13:MG	0	2.42106	0.941	0.385	0
M04441	Shox2	LGS13:MG	0	2.42106	0.941	0.385	0
M08949	Lhx6	LGS13:MG	0	2.30913	0.94	0.386	0
M01349	Mnx1	LGS13:MG	0	2.13675	0.931	0.378	0
M01444	Phox2a	LGS13:MG	0	2.21223	0.933	0.381	0
M01327	Vax2	LGS13:MG	0	2.34571	0.943	0.393	0
M01441	Nobox	LGS13:MG	0	2.17585	0.93	0.383	0
M04292	Bsx	LGS13:MG	0	2.13154	0.93	0.383	0
M04405	Msx1	LGS13:MG	0	2.13154	0.93	0.383	0
M04407	Msx2	LGS13:MG	0	2.13154	0.93	0.383	0
M01371	Gbx1	LGS13:MG	0	2.20094	0.937	0.391	0
M07994	Lbx1	LGS13:MG	0	2.29641	0.93	0.385	0
M04322	Gbx1	LGS13:MG	0	2.26371	0.932	0.388	0
M04385	Lhx2	LGS13:MG	0	2.30883	0.931	0.388	0
M00193	Nfia,Nfic	LGS13:MG	0	2.77786	0.975	0.433	0
M01382	Gbx2	LGS13:MG	0	2.15813	0.922	0.383	0
M04424	Pdx1	LGS13:MG	0	2.04401	0.923	0.387	0
M04344	Hoxa2	LGS13:MG	0	2.09806	0.928	0.393	0
M01461	Emx2	LGS13:MG	0	2.22567	0.938	0.403	0
M04348	Hoxb3	LGS13:MG	0	2.26314	0.935	0.401	0
M01427	Nkx1-2	LGS13:MG	0	2.08257	0.934	0.402	0
M02050	Nfix	LGS13:MG	0	2.28473	0.966	0.434	0
M10283	Lhx3	LGS13:MG	0	2.07483	0.923	0.391	0
M01339	Pax7	LGS13:MG	0	2.10388	0.926	0.396	0
M01417	Alx4	LGS13:MG	0	2.10924	0.924	0.396	0
M04393	Lmx1b	LGS13:MG	0	2.18146	0.927	0.399	0
M04443	Uncx	LGS13:MG	0	2.18146	0.927	0.399	0
M01196	Nfic	LGS13:MG	0	2.4822	0.965	0.439	0
M04319	Esx1	LGS13:MG	0	2.14663	0.926	0.401	0
M08912	En1	LGS13:MG	0	2.12858	0.923	0.398	0
M00806	Nfia,Nfic	LGS13:MG	0	2.50515	0.962	0.437	0
M02944	Alx4	LGS13:MG	0	2.06265	0.919	0.396	0
M04396	Lhx8	LGS13:MG	0	2.18544	0.926	0.404	0
M01475	Evx1	LGS13:MG	0	2.15086	0.93	0.409	0
M04416	Nkx6-2	LGS13:MG	0	2.18077	0.926	0.405	0
M04279	Alx3	LGS13:MG	0	2.02141	0.918	0.4	0
M04402	Mixl1	LGS13:MG	0	2.04806	0.918	0.401	0
M04415	Nkx6-1	LGS13:MG	0	2.07497	0.916	0.4	0
M07425	Msx2	LGS13:MG	0	2.10413	0.923	0.407	0
M02288	Plac8	LGS13:MG	0	2.10413	0.923	0.407	0
M01233	Pdx1	LGS13:MG	0	2.01376	0.918	0.404	0
M01325	Lhx2	LGS13:MG	0	2.09038	0.924	0.415	0
M07385	Lhx2	LGS13:MG	0	2.12639	0.923	0.414	0
M01455	En2	LGS13:MG	0	2.04855	0.921	0.414	0
M04373	Hoxd3	LGS13:MG	0	2.00559	0.912	0.417	0
M07128	Sox6	LGS13:Late_NG	0	3.7981	0.963	0.304	0
M09709	Sox3	LGS13:Late_NG	0	4.00791	0.964	0.308	0
M10068	Sox3	LGS13:Late_NG	0	4.24036	0.963	0.307	0
M07127	Sox3	LGS13:Late_NG	0	3.63793	0.953	0.304	0
M10067	Sox2	LGS13:Late_NG	0	3.60665	0.949	0.307	0
M07225	Sox2	LGS13:Late_NG	0	3.45099	0.955	0.317	0
M10069	Sox4	LGS13:Late_NG	0	3.37085	0.95	0.313	0
M10373	Sox4	LGS13:Late_NG	0	3.37085	0.95	0.313	0
M08972	Sox17	LGS13:Late_NG	0	3.18682	0.947	0.313	0
M08973	Sox2	LGS13:Late_NG	0	3.41669	0.946	0.313	0
M08971	Sox15	LGS13:Late_NG	0	3.07729	0.945	0.315	0
M00410	Sox9	LGS13:Late_NG	0	3.14271	0.952	0.324	0
M03138	Sox10	LGS13:Late_NG	0	2.75867	0.949	0.321	0
M01308	Sox4	LGS13:Late_NG	0	3.119	0.945	0.32	0
M02795	Sox11	LGS13:Late_NG	0	3.10925	0.94	0.315	0
M04004	Sox9	LGS13:Late_NG	0	3.20128	0.934	0.309	0
M09787	Sox13	LGS13:Late_NG	0	3.26247	0.936	0.312	0
M08899	Hbp1,Sox1,Sox10,Sox11,Sox13,Sox15,Sox17,Sox18,Sox2,Sox21,Sox3,Sox30,Sox4,Sox5,Sox6,Sox7,Sox8,Sox9,Sry	LGS13:Late_NG	0	3.09517	0.931	0.313	0
M03847	Sox15	LGS13:Late_NG	0	2.88067	0.941	0.33	0
M09819	Sox10	LGS13:Late_NG	0	2.85411	0.935	0.33	0
M08975	Sox6	LGS13:Late_NG	0	2.82012	0.932	0.329	0
M01284	Sox9	LGS13:Late_NG	0	2.689	0.935	0.338	0
M07432	Sox2	LGS13:Late_NG	0	2.52921	0.93	0.334	0
M08970	Sox10	LGS13:Late_NG	0	2.72683	0.927	0.331	0
M08976	Sry	LGS13:Late_NG	0	2.72646	0.928	0.334	0
M01590	Smad1	LGS13:Late_NG	0	2.56148	0.925	0.335	0
M03886	Sox2	LGS13:Late_NG	0	2.54905	0.927	0.337	0
M02116	Sox10	LGS13:Late_NG	0	2.60843	0.922	0.334	0
M07269	Sox9	LGS13:Late_NG	0	2.54753	0.925	0.34	0
M07308	Sox2	LGS13:Late_NG	0	2.53569	0.917	0.332	0
M01016	Sox17	LGS13:Late_NG	0	2.40325	0.909	0.327	0
M04091	Pou6f2	LGS13:Late_NG	0	3.82651	0.959	0.377	0
M01272	Sox2	LGS13:Late_NG	0	2.38314	0.917	0.342	0
M03803	Sox17	LGS13:Late_NG	0	2.2245	0.914	0.343	0
M08974	Sox5	LGS13:Late_NG	0	2.43374	0.91	0.34	0
M04390	Lhx9	LGS13:Late_NG	0	3.67587	0.953	0.383	0
M04433	Prrx2	LGS13:Late_NG	0	3.67587	0.953	0.383	0
M04439	Shox2	LGS13:Late_NG	0	3.67587	0.953	0.383	0
M02917	Sry	LGS13:Late_NG	0	2.55981	0.916	0.347	0
M02804	Sox30	LGS13:Late_NG	0	2.4256	0.905	0.337	0
M03888	Sox6	LGS13:Late_NG	0	2.36785	0.919	0.353	0
M07309	Sox7	LGS13:Late_NG	0	2.51703	0.925	0.359	0
M02902	Sox14,Sox4	LGS13:Late_NG	0	2.39513	0.907	0.343	0
M04384	Lbx2	LGS13:Late_NG	0	3.5866	0.943	0.379	0
M01479	Pou6f1	LGS13:Late_NG	0	3.10189	0.944	0.382	0
M04417	Noto	LGS13:Late_NG	0	3.60576	0.955	0.394	0
M08024	Pou6f2	LGS13:Late_NG	0	3.18434	0.945	0.385	0
M04291	Barx1	LGS13:Late_NG	0	2.79483	0.914	0.355	0
M04837	Nanog	LGS13:Late_NG	0	2.22941	0.909	0.35	0
M04385	Lhx2	LGS13:Late_NG	0	3.55651	0.954	0.396	0
M10282	Lhx2	LGS13:Late_NG	0	3.41402	0.938	0.38	0
M04316	En1	LGS13:Late_NG	0	3.88049	0.95	0.394	0
M04322	Gbx1	LGS13:Late_NG	0	3.31335	0.949	0.396	0
M04344	Hoxa2	LGS13:Late_NG	0	3.22024	0.954	0.401	0
M04324	Gbx2	LGS13:Late_NG	0	3.0707	0.934	0.382	0
M01382	Gbx2	LGS13:Late_NG	0	3.25827	0.941	0.391	0
M04327	Gsx1	LGS13:Late_NG	0	3.51653	0.939	0.389	0
M07994	Lbx1	LGS13:Late_NG	0	3.36519	0.944	0.394	0
M01462	Pou6f1	LGS13:Late_NG	0	2.66911	0.928	0.379	0
M04329	Gbx1	LGS13:Late_NG	0	3.36806	0.942	0.394	0
M01331	Isx	LGS13:Late_NG	0	2.85886	0.93	0.383	0
M01393	Msx2	LGS13:Late_NG	0	2.94711	0.921	0.375	0
M04381	Isx	LGS13:Late_NG	0	3.43522	0.94	0.394	0
M04431	Prrx1	LGS13:Late_NG	0	3.43522	0.94	0.394	0
M04441	Shox2	LGS13:Late_NG	0	3.43522	0.94	0.394	0
M01247	Nanog	LGS13:Late_NG	0	2.01172	0.899	0.357	0
M08912	En1	LGS13:Late_NG	0	3.11417	0.947	0.405	0
M04319	Esx1	LGS13:Late_NG	0	3.26771	0.949	0.409	0
M01162	Nobox	LGS13:Late_NG	0	2.89105	0.912	0.373	0
M01441	Nobox	LGS13:Late_NG	0	2.96963	0.931	0.392	0
M10283	Lhx3	LGS13:Late_NG	0	2.98638	0.938	0.399	0
M07307	Sox18	LGS13:Late_NG	0	2.12564	0.889	0.352	0
M04312	Emx1	LGS13:Late_NG	0	3.12672	0.946	0.411	0
M01349	Mnx1	LGS13:Late_NG	0	2.75805	0.921	0.387	0
M08949	Lhx6	LGS13:Late_NG	0	2.93189	0.928	0.395	0
M04330	Hesx1	LGS13:Late_NG	0	3.10537	0.948	0.415	0
M07398	Pou4f2	LGS13:Late_NG	0	2.74883	0.925	0.393	0
M09976	Lhx2	LGS13:Late_NG	0	3.18153	0.931	0.399	0
M01461	Emx2	LGS13:Late_NG	0	3.14613	0.942	0.411	0
M04348	Hoxb3	LGS13:Late_NG	0	3.13976	0.94	0.41	0
M01444	Phox2a	LGS13:Late_NG	0	2.8506	0.918	0.39	0
M04292	Bsx	LGS13:Late_NG	0	2.67752	0.919	0.392	0
M04405	Msx1	LGS13:Late_NG	0	2.67752	0.919	0.392	0
M04407	Msx2	LGS13:Late_NG	0	2.67752	0.919	0.392	0
M04299	Dlx1	LGS13:Late_NG	0	2.71927	0.94	0.413	0
M08041	Dlx1	LGS13:Late_NG	0	2.71927	0.94	0.413	0
M01475	Evx1	LGS13:Late_NG	0	2.96198	0.942	0.417	0
M01371	Gbx1	LGS13:Late_NG	0	2.70344	0.925	0.401	0
M04396	Lhx8	LGS13:Late_NG	0	3.26794	0.936	0.412	0
M10066	Sox17	LGS13:Late_NG	0	2.08599	0.882	0.358	0
M01327	Vax2	LGS13:Late_NG	0	2.96205	0.925	0.402	0
M04314	Emx2	LGS13:Late_NG	0	2.97186	0.945	0.422	0
M04318	En2	LGS13:Late_NG	0	2.78688	0.926	0.404	0
M04328	Gsx2	LGS13:Late_NG	0	2.89779	0.913	0.393	0
M04435	Rax	LGS13:Late_NG	0	2.9202	0.926	0.406	0
M07047	Lhx2	LGS13:Late_NG	0	2.75809	0.94	0.422	0
M04416	Nkx6-2	LGS13:Late_NG	0	3.08912	0.931	0.414	0
M04398	Meox1	LGS13:Late_NG	0	2.9096	0.946	0.429	0
M01339	Pax7	LGS13:Late_NG	0	2.7856	0.92	0.404	0
M01412	Msx1	LGS13:Late_NG	0	2.62698	0.913	0.397	0
M01455	En2	LGS13:Late_NG	0	2.85972	0.937	0.422	0
M04393	Lmx1b	LGS13:Late_NG	0	3.10483	0.922	0.407	0
M04443	Uncx	LGS13:Late_NG	0	3.10483	0.922	0.407	0
M01389	Rax	LGS13:Late_NG	0	2.89627	0.94	0.425	0
M08770	Hoxa3	LGS13:Late_NG	0	2.94435	0.943	0.428	0
M04349	Hoxb5	LGS13:Late_NG	0	2.86587	0.93	0.416	0
M04368	Hoxa2	LGS13:Late_NG	0	2.90942	0.933	0.419	0
M04387	Lhx6	LGS13:Late_NG	0	2.87441	0.933	0.419	0
M04451	Vsx2	LGS13:Late_NG	0	2.79383	0.926	0.413	0
M08015	Vsx1	LGS13:Late_NG	0	2.79383	0.926	0.413	0
M00437	Vsx2	LGS13:Late_NG	0	2.88018	0.951	0.438	0
M04450	Vsx1	LGS13:Late_NG	0	2.77978	0.943	0.43	0
M01427	Nkx1-2	LGS13:Late_NG	0	2.65254	0.923	0.411	0
M00099	Prrx2	LGS13:Late_NG	0	2.7546	0.94	0.43	0
M01334	Nkx1-1	LGS13:Late_NG	0	2.29692	0.919	0.409	0
M04294	Barhl1	LGS13:Late_NG	0	2.44975	0.886	0.376	0
M07988	Emx1	LGS13:Late_NG	0	3.08703	0.94	0.432	0
M08981	Vsx1	LGS13:Late_NG	0	3.01159	0.95	0.442	0
M10070	Sox9	LGS13:Late_NG	0	2.25041	0.759	0.251	0
M10374	Sox9	LGS13:Late_NG	0	2.25041	0.759	0.251	0
M04402	Mixl1	LGS13:Late_NG	0	2.90359	0.916	0.409	0
M04288	Barhl2	LGS13:Late_NG	0	2.39833	0.89	0.383	0
M01233	Pdx1	LGS13:Late_NG	0	2.72903	0.919	0.413	0
M01365	En1	LGS13:Late_NG	0	2.71056	0.915	0.41	0
M01401	Lbx2	LGS13:Late_NG	0	2.67188	0.93	0.425	0
M07385	Lhx2	LGS13:Late_NG	0	2.96931	0.927	0.422	0
M01337	Hoxa3	LGS13:Late_NG	0	2.88056	0.932	0.428	0
M02944	Alx4	LGS13:Late_NG	0	2.8328	0.908	0.404	0
M01417	Alx4	LGS13:Late_NG	0	2.82468	0.907	0.405	0
M07425	Msx2	LGS13:Late_NG	0	2.79105	0.917	0.416	0
M02288	Plac8	LGS13:Late_NG	0	2.79105	0.917	0.416	0
M01415	Shox2	LGS13:Late_NG	0	2.81593	0.916	0.416	0
M04343	Hoxa1	LGS13:Late_NG	0	2.89235	0.93	0.43	0
M04347	Hoxb2	LGS13:Late_NG	0	2.86576	0.935	0.435	0
M04415	Nkx6-1	LGS13:Late_NG	0	2.65559	0.908	0.408	0
M08003	Pou6f1	LGS13:Late_NG	0	2.43587	0.911	0.411	0
M01438	Pdx1	LGS13:Late_NG	0	2.65636	0.938	0.438	0
M01335	Vsx1	LGS13:Late_NG	0	2.56204	0.909	0.411	0
M04614	Pdx1	LGS13:Late_NG	0	2.42488	0.912	0.414	0
M01325	Lhx2	LGS13:Late_NG	0	2.81897	0.921	0.424	0
M01376	Prrx2	LGS13:Late_NG	0	2.81021	0.934	0.437	0
M04445	Uncx	LGS13:Late_NG	0	2.90677	0.923	0.426	0
M04365	Hoxd8	LGS13:Late_NG	0	2.38228	0.907	0.411	0
M04394	Lhx4	LGS13:Late_NG	0	2.63053	0.914	0.418	0
M01386	Evx2	LGS13:Late_NG	0	2.66259	0.94	0.446	0
M04392	Lmx1a	LGS13:Late_NG	0	2.75407	0.92	0.427	0
M04321	Evx2	LGS13:Late_NG	0	2.53873	0.941	0.448	0
M01474	Esx1	LGS13:Late_NG	0	2.73822	0.923	0.431	0
M04373	Hoxd3	LGS13:Late_NG	0	2.75258	0.917	0.425	0
M01330	Hoxb3	LGS13:Late_NG	0	2.80062	0.939	0.448	0
M04446	Vax1	LGS13:Late_NG	0	2.44825	0.918	0.431	0
M04447	Vax2	LGS13:Late_NG	0	2.44825	0.918	0.431	0
M10337	Pdx1	LGS13:Late_NG	0	2.05532	0.893	0.406	0
M01448	Hoxd1	LGS13:Late_NG	0	2.71202	0.935	0.449	0
M01354	Pou2f1	LGS13:Late_NG	0	2.33497	0.902	0.417	0
M01439	Dlx1	LGS13:Late_NG	0	2.37283	0.908	0.423	0
M01355	Alx3	LGS13:Late_NG	0	2.69506	0.927	0.443	0
M01319	Hoxb5	LGS13:Late_NG	0	2.52009	0.93	0.447	0
M01332	Barhl1	LGS13:Late_NG	0	2.2881	0.897	0.414	0
M04320	Evx1	LGS13:Late_NG	0	2.42216	0.927	0.444	0
M01326	Gsx2	LGS13:Late_NG	0	2.79269	0.932	0.45	0
M01385	Pax4	LGS13:Late_NG	0	2.68064	0.925	0.444	0
M04279	Alx3	LGS13:Late_NG	0	2.5853	0.89	0.409	0
M04399	Meox2	LGS13:Late_NG	0	2.41472	0.907	0.427	0
M01235	Pdx1	LGS13:Late_NG	0	2.34609	0.916	0.439	0
M01423	Arx	LGS13:Late_NG	0	2.43346	0.899	0.423	0
M01424	Hoxb4	LGS13:Late_NG	0	2.33915	0.898	0.422	0
M01477	Pou3f2	LGS13:Late_NG	0	2.47507	0.898	0.422	0
M01348	Prrx1	LGS13:Late_NG	0	2.45176	0.912	0.437	0
M01370	Hoxa4	LGS13:Late_NG	0	2.16814	0.891	0.416	0
M04425	Pdx1	LGS13:Late_NG	0	2.48867	0.908	0.434	0
M09767	Ascl1	LGS13:Late_NG	0	3.47454	0.911	0.439	0
M01402	Hoxa2	LGS13:Late_NG	0	2.42304	0.93	0.46	0
M00698	Tcf12	LGS13:Late_NG	0	3.49897	0.92	0.451	0
M02737	Ascl2	LGS13:Late_NG	0	3.57419	0.911	0.443	0
M04403	Mnx1	LGS13:Late_NG	0	2.31945	0.89	0.422	0
M01394	Hoxa7	LGS13:Late_NG	0	2.09496	0.884	0.419	0
M10411	Vsx2	LGS13:Late_NG	0	2.58815	0.946	0.481	0
M01431	Barx2	LGS13:Late_NG	0	2.06191	0.87	0.406	0
M00927	Tfap4	LGS13:Late_NG	0	4.01439	0.91	0.447	0
M01367	Lhx9	LGS13:Late_NG	0	2.21098	0.879	0.417	0
M04931	Tcf12	LGS13:Late_NG	0	2.20657	0.92	0.458	0
M07603	Dlx3	LGS13:Late_NG	0	2.04566	0.889	0.427	0
M01396	Hoxb7	LGS13:Late_NG	0	2.05776	0.876	0.415	0
M01397	Vax1	LGS13:Late_NG	0	2.50196	0.913	0.452	0
M04159	Ascl2	LGS13:Late_NG	0	3.80178	0.906	0.445	0
M04304	Dlx6	LGS13:Late_NG	0	2.22458	0.884	0.423	0
M01323	Otp	LGS13:Late_NG	0	2.14978	0.894	0.434	0
M01356	Phox2b	LGS13:Late_NG	0	2.12059	0.887	0.427	0
M10351	Ptf1a	LGS13:Late_NG	0	4.51604	0.911	0.452	0
M01421	Lhx4	LGS13:Late_NG	0	2.25939	0.912	0.454	0
M01452	Hoxa5	LGS13:Late_NG	0	2.39838	0.904	0.449	0
M07113	Myog	LGS13:Late_NG	0	3.95405	0.904	0.452	0
M01458	Uncx	LGS13:Late_NG	0	2.15229	0.879	0.428	0
M01487	Hoxa1	LGS13:Late_NG	0	2.37652	0.917	0.466	0
M02100	Myod1	LGS13:Late_NG	0	3.84394	0.914	0.463	0
M07134	Tcf12	LGS13:Late_NG	0	3.9548	0.903	0.452	0
M01440	Lhx8	LGS13:Late_NG	0	2.06195	0.91	0.46	0
M01320	Prop1	LGS13:Late_NG	0	2.14867	0.879	0.43	0
M09698	Myod1	LGS13:Late_NG	0	3.72072	0.907	0.46	0
M01338	Hoxd3	LGS13:Late_NG	0	2.16857	0.892	0.446	0
M07112	Myod1	LGS13:Late_NG	0	3.91676	0.902	0.456	0
M04185	Olig1	LGS13:Late_NG	0	3.40165	0.873	0.428	0
M09691	Tcf12	LGS13:Late_NG	0	3.69052	0.898	0.453	0
M10178	Ascl2	LGS13:Late_NG	0	3.33392	0.909	0.465	0
M09993	Myod1	LGS13:Late_NG	0	3.73815	0.901	0.461	0
M09977	Lyl1	LGS13:Late_NG	0	4.10635	0.901	0.463	0
M10177	Ascl1	LGS13:Late_NG	0	2.96716	0.903	0.465	0
M10285	Lyl1	LGS13:Late_NG	0	4.10635	0.901	0.463	0
M09875	Bhlha15	LGS13:Late_NG	0	4.50282	0.906	0.469	0
M10188	Bhlha15	LGS13:Late_NG	0	4.50282	0.906	0.469	0
M04164	Bhlhe22	LGS13:Late_NG	0	3.13706	0.875	0.439	0
M04186	Olig2	LGS13:Late_NG	0	3.13949	0.868	0.432	0
M08027	Bhlhe23	LGS13:Late_NG	0	3.13706	0.875	0.439	0
M01716	Atoh1,Tcf3	LGS13:Late_NG	0	3.29893	0.905	0.47	0
M04187	Olig3	LGS13:Late_NG	0	3.15041	0.867	0.433	0
M07609	Neurog2	LGS13:Late_NG	0	5.01386	0.898	0.464	0
M04184	Nhlh1	LGS13:Late_NG	0	2.18552	0.864	0.431	0
M01288	Neurod1	LGS13:Late_NG	0	2.51575	0.895	0.463	0
M10301	Myod1	LGS13:Late_NG	0	3.78542	0.9	0.47	0
M10019	Olig2	LGS13:Late_NG	0	5.48792	0.898	0.469	0
M10329	Olig2	LGS13:Late_NG	0	5.48792	0.898	0.469	0
M04161	Bhlha15	LGS13:Late_NG	0	3.54483	0.864	0.435	0
M09703	Olig2	LGS13:Late_NG	0	4.96914	0.897	0.468	0
M04165	Bhlhe23	LGS13:Late_NG	0	3.24264	0.87	0.443	0
M08028	Bhlhe22	LGS13:Late_NG	0	3.24264	0.87	0.443	0
M07983	Bhlha15	LGS13:Late_NG	0	2.93622	0.864	0.439	0
M09962	Tcf4	LGS13:Late_NG	0	3.48119	0.899	0.476	0
M03880	Myf5	LGS13:Late_NG	0	2.71043	0.888	0.466	0
M09865	Ascl1	LGS13:Late_NG	0	2.83974	0.897	0.478	0
M01287	Neurod1,Neurod2	LGS13:Late_NG	0	3.40392	0.86	0.442	0
M04182	Neurod2	LGS13:Late_NG	0	3.40392	0.86	0.442	0
M10407	Twist1	LGS13:Late_NG	0	2.67832	0.874	0.456	0
M10296	Msgn1	LGS13:Late_NG	0	5.99652	0.897	0.481	0
M01422	Lhx6	LGS13:Late_NG	0	2.13672	0.911	0.496	0
M07999	Neurog1	LGS13:Late_NG	0	3.40279	0.854	0.439	0
M09674	Atoh1	LGS13:Late_NG	0	8.16137	0.904	0.492	0
M10103	Twist1	LGS13:Late_NG	0	2.45551	0.867	0.455	0
M07469	Lyl1,Nhlh2,Tal1	LGS13:Late_NG	0	3.05257	0.888	0.478	0
M04160	Atoh1	LGS13:Late_NG	0	3.27401	0.858	0.448	0
M10305	Neurod2	LGS13:Late_NG	0	8.71895	0.9	0.492	0
M10315	Neurog2	LGS13:Late_NG	0	8.37402	0.898	0.491	0
M10099	Tcf3	LGS13:Late_NG	0	2.54668	0.879	0.473	0
M10402	Tcf3	LGS13:Late_NG	0	2.54668	0.879	0.473	0
M07075	Atoh1	LGS13:Late_NG	0	6.99509	0.893	0.488	0
M09998	Neurod2	LGS13:Late_NG	0	8.28997	0.899	0.495	0
M04041	Tgif2	LGS13:Late_NG	0	2.13583	0.859	0.455	0
M09870	Atoh1	LGS13:Late_NG	0	8.01144	0.898	0.496	0
M10182	Atoh1	LGS13:Late_NG	0	8.01144	0.898	0.496	0
M09701	Neurod1	LGS13:Late_NG	0	8.58139	0.897	0.497	0
M00804	Myf6,Myod1,Tcf3	LGS13:Late_NG	0	2.45944	0.891	0.492	0
M09997	Neurod1	LGS13:Late_NG	0	8.77336	0.895	0.499	0
M10304	Neurod1	LGS13:Late_NG	0	8.77336	0.895	0.499	0
M00175	Tfap4	LGS13:Late_NG	0	2.33836	0.859	0.466	0
M03804	Tal1	LGS13:Late_NG	0	8.08224	0.889	0.497	0
M00993	Tal1	LGS13:Late_NG	0	6.5583	0.895	0.505	0
M01808	Mycn	LGS13:Late_NG	0	4.72457	0.868	0.478	0
M04037	Pknox2	LGS13:Late_NG	0	2.4731	0.86	0.47	0
M02088	Tcf3	LGS13:Late_NG	0	3.3508	0.891	0.506	0
M02781	Myf6	LGS13:Late_NG	0	2.90031	0.879	0.495	0
M04183	Neurog2	LGS13:Late_NG	0	3.60301	0.859	0.476	0
M00693	Tcf3	LGS13:Late_NG	0	2.51893	0.871	0.489	0
M09776	Neurod1	LGS13:Late_NG	0	8.64029	0.887	0.508	0
M08006	Twist2	LGS13:Late_NG	0	2.16347	0.828	0.449	0
Atoh7-Custom		LGS13:Late_NG	0	5.1137	0.869	0.491	0
M09721	Tcf3	LGS13:Late_NG	0	2.16431	0.869	0.494	0
M04181	Myf6	LGS13:Late_NG	0	2.31342	0.84	0.465	0
M00184	Myod1	LGS13:Late_NG	0	3.19196	0.879	0.513	0
M04195	Tcf21	LGS13:Late_NG	0	3.60257	0.85	0.484	0
M02927	Tcf3	LGS13:Late_NG	0	5.6069	0.871	0.511	0
M08951	Myf6	LGS13:Late_NG	0	2.26793	0.844	0.484	0
M00002	Tcf3	LGS13:Late_NG	0	2.84908	0.868	0.515	0
M00066	Tal1,Tcf3	LGS13:Late_NG	0	6.24779	0.87	0.519	0
M04570	Msc	LGS13:Late_NG	0	2.30986	0.836	0.485	0
M07422	Ascl1	LGS13:Late_NG	0	3.19402	0.869	0.519	0
M10264	Tcf12	LGS13:Late_NG	0	2.39451	0.871	0.523	0
M00070	Tal1,Tcf4	LGS13:Late_NG	0	6.10846	0.864	0.517	0
M09951	Tcf12	LGS13:Late_NG	0	2.12829	0.842	0.5	0
M00065	Tal1,Tcf3	LGS13:Late_NG	0	5.6825	0.862	0.521	0
M00929	Myf6,Myod1,Tcf3	LGS13:Late_NG	0	2.14646	0.851	0.514	0
M03934	Zbtb18	LGS13:BC	0	4.30282	0.984	0.268	0
M09888	Crx	LGS13:BC	0	5.86104	0.995	0.309	0
M10021	Otx2	LGS13:BC	0	6.25955	0.997	0.311	0
M10201	Crx	LGS13:BC	0	5.86104	0.995	0.309	0
M07081	Crx	LGS13:BC	0	5.93091	0.996	0.311	0
M08895	Pitx1,Pitx2,Pitx3	LGS13:BC	0	5.54682	0.996	0.311	0
M09680	Crx	LGS13:BC	0	5.71306	0.995	0.311	0
M10338	Pitx1	LGS13:BC	0	5.36716	0.996	0.312	0
M04326	Gsc	LGS13:BC	0	5.40166	0.995	0.312	0
M04429	Pitx3	LGS13:BC	0	5.63509	0.995	0.312	0
M04623	Otx2	LGS13:BC	0	5.59315	0.995	0.312	0
M04325	Gsc2	LGS13:BC	0	5.36602	0.994	0.312	0
M07352	Crx	LGS13:BC	0	5.12919	0.992	0.31	0
M01343	Pitx3	LGS13:BC	0	4.86255	0.992	0.311	0
M01484	Pitx1	LGS13:BC	0	5.29037	0.994	0.313	0
M01712	Crx	LGS13:BC	0	4.91984	0.992	0.311	0
M01719	Otx2	LGS13:BC	0	4.83593	0.992	0.312	0
M01436	Crx	LGS13:BC	0	4.80446	0.99	0.311	0
M04305	Dmbx1	LGS13:BC	0	4.85645	0.991	0.312	0
M04428	Pitx1	LGS13:BC	0	4.80462	0.99	0.312	0
M04505	Pitx1	LGS13:BC	0	4.99227	0.991	0.313	0
M04421	Otx2	LGS13:BC	0	4.64243	0.989	0.312	0
M01366	Otx1	LGS13:BC	0	4.95178	0.991	0.316	0
M01428	Gsc	LGS13:BC	0	4.68281	0.99	0.315	0
M01387	Otx2	LGS13:BC	0	4.66833	0.989	0.315	0
M07392	Pitx3	LGS13:BC	0	4.08382	0.985	0.313	0
M01735	Pitx3	LGS13:BC	0	4.07239	0.986	0.316	0
M07055	Pitx1	LGS13:BC	0	4.06402	0.986	0.316	0
M00623	Crx,Rax	LGS13:BC	0	3.89415	0.984	0.316	0
M01229	Gtf2ird1	LGS13:BC	0	3.5146	0.98	0.314	0
M04423	Otx1	LGS13:BC	0	3.68297	0.974	0.314	0
M04418	Otx1	LGS13:BC	0	3.71456	0.963	0.306	0
M04422	Otx1	LGS13:BC	0	3.68288	0.957	0.309	0
M07057	Pitx3	LGS13:BC	0	3.12371	0.963	0.317	0
M00127	Gata1	LGS13:BC	0	3.1287	0.964	0.319	0
M04420	Otx2	LGS13:BC	0	3.70355	0.955	0.31	0
M09790	Twist1	LGS13:BC	0	4.40551	0.975	0.332	0
M03838	Otx1	LGS13:BC	0	2.97911	0.954	0.322	0
M08733	Hoxa3,Pitx1	LGS13:BC	0	2.95617	0.955	0.328	0
M08477	Foxj2,Pitx1	LGS13:BC	0	2.79151	0.951	0.328	0
M01826	Pitx1	LGS13:BC	0	2.66079	0.952	0.33	0
M01117	Otx1,Otx2	LGS13:BC	0	2.76064	0.941	0.328	0
M01808	Mycn	LGS13:BC	0	3.12936	0.921	0.336	0
M04195	Tcf21	LGS13:BC	0	2.81571	0.916	0.344	0
M07428	Six3	LGS13:BC	0	2.10983	0.917	0.345	0
M06736	Zfp354b	LGS13:BC	0	2.05273	0.915	0.35	0
M08501	Hoxb2,Pitx1	LGS13:BC	0	2.11517	0.906	0.343	0
M00066	Tal1,Tcf3	LGS13:BC	0	3.99149	0.936	0.385	0
M00070	Tal1,Tcf4	LGS13:BC	0	3.85953	0.932	0.383	0
M02927	Tcf3	LGS13:BC	0	3.66148	0.927	0.378	0
M00065	Tal1,Tcf3	LGS13:BC	0	3.72963	0.935	0.387	0
M09997	Neurod1	LGS13:BC	0	4.18664	0.908	0.369	0
M10304	Neurod1	LGS13:BC	0	4.18664	0.908	0.369	0
Atoh7-Custom		LGS13:BC	0	2.85349	0.899	0.361	0
M10315	Neurog2	LGS13:BC	0	3.67509	0.893	0.365	0
M09870	Atoh1	LGS13:BC	0	3.61943	0.895	0.371	0
M10182	Atoh1	LGS13:BC	0	3.61943	0.895	0.371	0
M09998	Neurod2	LGS13:BC	0	3.52046	0.888	0.372	0
M09701	Neurod1	LGS13:BC	0	3.61252	0.889	0.374	0
M09776	Neurod1	LGS13:BC	0	3.77882	0.895	0.386	0
M10305	Neurod2	LGS13:BC	0	3.49665	0.88	0.371	0
M09674	Atoh1	LGS13:BC	0	3.30502	0.876	0.373	0
M10019	Olig2	LGS13:BC	0	2.24878	0.848	0.351	0
M10329	Olig2	LGS13:BC	0	2.24878	0.848	0.351	0
M04183	Neurog2	LGS13:BC	0	2.06217	0.85	0.358	0
M03804	Tal1	LGS13:BC	0	3.13682	0.866	0.382	0
M00993	Tal1	LGS13:BC	0	2.66741	0.869	0.392	0
M07075	Atoh1	LGS13:BC	0	2.74003	0.851	0.376	0
M07609	Neurog2	LGS13:BC	0	2.04171	0.828	0.353	0
M10296	Msgn1	LGS13:BC	0	2.05168	0.82	0.378	0
M04185	Olig1	LGS13:Photo_BC	0	4.11919	0.992	0.421	0
M04161	Bhlha15	LGS13:Photo_BC	0	4.5394	0.994	0.428	0
M04186	Olig2	LGS13:Photo_BC	0	3.9306	0.991	0.425	0
M07999	Neurog1	LGS13:Photo_BC	0	4.43724	0.996	0.431	0
M04187	Olig3	LGS13:Photo_BC	0	3.94894	0.989	0.426	0
M01287	Neurod1,Neurod2	LGS13:Photo_BC	0	4.42464	0.995	0.435	0
M04182	Neurod2	LGS13:Photo_BC	0	4.42464	0.995	0.435	0
M07983	Bhlha15	LGS13:Photo_BC	0	3.81623	0.992	0.432	0
M04164	Bhlhe22	LGS13:Photo_BC	0	4.00131	0.992	0.433	0
M08027	Bhlhe23	LGS13:Photo_BC	0	4.00131	0.992	0.433	0
M04165	Bhlhe23	LGS13:Photo_BC	0	4.06336	0.992	0.436	0
M08028	Bhlhe22	LGS13:Photo_BC	0	4.06336	0.992	0.436	0
M00927	Tfap4	LGS13:Photo_BC	0	3.98995	0.993	0.441	0
M10351	Ptf1a	LGS13:Photo_BC	0	5.19636	0.999	0.447	0
M00698	Tcf12	LGS13:Photo_BC	0	4.26207	0.996	0.445	0
M04160	Atoh1	LGS13:Photo_BC	0	4.204	0.992	0.441	0
M04159	Ascl2	LGS13:Photo_BC	0	3.64426	0.99	0.44	0
M02737	Ascl2	LGS13:Photo_BC	0	3.24667	0.987	0.438	0
M07113	Myog	LGS13:Photo_BC	0	4.03873	0.995	0.446	0
M07134	Tcf12	LGS13:Photo_BC	0	4.0574	0.994	0.447	0
M09767	Ascl1	LGS13:Photo_BC	0	3.1678	0.98	0.434	0
M08006	Twist2	LGS13:Photo_BC	0	3.15989	0.985	0.441	0
M09691	Tcf12	LGS13:Photo_BC	0	3.65604	0.991	0.447	0
M07112	Myod1	LGS13:Photo_BC	0	3.84034	0.993	0.45	0
M07609	Neurog2	LGS13:Photo_BC	0	6.36934	0.999	0.458	0
M09977	Lyl1	LGS13:Photo_BC	0	4.97919	0.998	0.457	0
M10285	Lyl1	LGS13:Photo_BC	0	4.97919	0.998	0.457	0
M09993	Myod1	LGS13:Photo_BC	0	3.62422	0.994	0.455	0
M02100	Myod1	LGS13:Photo_BC	0	3.81747	0.995	0.457	0
M09703	Olig2	LGS13:Photo_BC	0	6.14456	1	0.462	0
M10103	Twist1	LGS13:Photo_BC	0	3.25238	0.986	0.448	0
M09698	Myod1	LGS13:Photo_BC	0	3.67501	0.992	0.455	0
M10019	Olig2	LGS13:Photo_BC	0	6.86488	1	0.463	0
M10329	Olig2	LGS13:Photo_BC	0	6.86488	1	0.463	0
M10407	Twist1	LGS13:Photo_BC	0	3.50914	0.986	0.449	0
M09875	Bhlha15	LGS13:Photo_BC	0	5.04385	0.999	0.464	0
M10188	Bhlha15	LGS13:Photo_BC	0	5.04385	0.999	0.464	0
M04931	Tcf12	LGS13:Photo_BC	0	2.51157	0.987	0.453	0
M01716	Atoh1,Tcf3	LGS13:Photo_BC	0	3.63276	0.994	0.464	0
M10301	Myod1	LGS13:Photo_BC	0	3.83055	0.995	0.465	0
M01808	Mycn	LGS13:Photo_BC	0	6.97929	1	0.471	0
M00175	Tfap4	LGS13:Photo_BC	0	3.12032	0.988	0.46	0
M04183	Neurog2	LGS13:Photo_BC	0	4.86641	0.996	0.469	0
M10296	Msgn1	LGS13:Photo_BC	0	7.69543	1	0.475	0
M01288	Neurod1	LGS13:Photo_BC	0	2.96748	0.983	0.458	0
M09962	Tcf4	LGS13:Photo_BC	0	3.87875	0.995	0.471	0
M08411	Bhlha15,Rfx3	LGS13:Photo_BC	0	2.74493	0.977	0.456	0
M04195	Tcf21	LGS13:Photo_BC	0	4.54476	0.995	0.476	0
M07469	Lyl1,Nhlh2,Tal1	LGS13:Photo_BC	0	3.46052	0.991	0.472	0
M00069	Yy1	LGS13:Photo_BC	0	2.53183	0.969	0.451	0
M07075	Atoh1	LGS13:Photo_BC	0	9.26053	1	0.482	0
M10097	Tfap4	LGS13:Photo_BC	0	2.96894	0.982	0.464	0
Atoh7-Custom		LGS13:Photo_BC	0	7.1516	1	0.484	0
M10315	Neurog2	LGS13:Photo_BC	0	10.8845	1	0.485	0
M00068	Nhlh1	LGS13:Photo_BC	0	2.44066	0.974	0.459	0
M08787	Tcf15	LGS13:Photo_BC	0	2.38217	0.963	0.449	0
M09790	Twist1	LGS13:Photo_BC	0	4.25371	0.997	0.483	0
M10305	Neurod2	LGS13:Photo_BC	0	11.4178	1	0.486	0
M09674	Atoh1	LGS13:Photo_BC	0	10.4262	1	0.487	0
M10178	Ascl2	LGS13:Photo_BC	0	2.85404	0.972	0.46	0
M00058	Nhlh1	LGS13:Photo_BC	0	2.01161	0.946	0.436	0
M09870	Atoh1	LGS13:Photo_BC	0	10.4739	1	0.49	0
M09998	Neurod2	LGS13:Photo_BC	0	10.9065	1	0.49	0
M10182	Atoh1	LGS13:Photo_BC	0	10.4739	1	0.49	0
M00176	Tfap4	LGS13:Photo_BC	0	2.81417	0.979	0.47	0
M03804	Tal1	LGS13:Photo_BC	0	11.1962	1	0.491	0
M09701	Neurod1	LGS13:Photo_BC	0	11.2244	1	0.491	0
M03880	Myf5	LGS13:Photo_BC	0	2.62769	0.97	0.461	0
M10177	Ascl1	LGS13:Photo_BC	0	2.48524	0.969	0.46	0
M09997	Neurod1	LGS13:Photo_BC	0	11.6467	1	0.493	0
M10304	Neurod1	LGS13:Photo_BC	0	11.6467	1	0.493	0
M04181	Myf6	LGS13:Photo_BC	0	2.44476	0.965	0.459	0
M05606	Zfp691	LGS13:Photo_BC	0	2.16284	0.956	0.454	0
M00993	Tal1	LGS13:Photo_BC	0	8.54393	1	0.499	0
M04037	Pknox2	LGS13:Photo_BC	0	2.5726	0.965	0.464	0
M01366	Otx1	LGS13:Photo_BC	0	4.49178	0.976	0.476	0
M09776	Neurod1	LGS13:Photo_BC	0	11.997	1	0.502	0
M10099	Tcf3	LGS13:Photo_BC	0	2.3865	0.966	0.468	0
M10402	Tcf3	LGS13:Photo_BC	0	2.3865	0.966	0.468	0
M02927	Tcf3	LGS13:Photo_BC	0	8.24564	1	0.504	0
M04192	Tfap4	LGS13:Photo_BC	0	2.40583	0.964	0.468	0
M04041	Tgif2	LGS13:Photo_BC	0	2.17555	0.945	0.45	0
M02088	Tcf3	LGS13:Photo_BC	0	3.68736	0.994	0.5	0
M04570	Msc	LGS13:Photo_BC	0	2.75057	0.97	0.478	0
M08951	Myf6	LGS13:Photo_BC	0	2.48904	0.969	0.478	0
M09951	Tcf12	LGS13:Photo_BC	0	2.78561	0.984	0.493	0
M00070	Tal1,Tcf4	LGS13:Photo_BC	0	8.5257	1	0.51	0
M01387	Otx2	LGS13:Photo_BC	0	4.08611	0.965	0.475	0
M09865	Ascl1	LGS13:Photo_BC	0	2.33725	0.964	0.474	0
M02781	Myf6	LGS13:Photo_BC	0	2.939	0.979	0.49	0
M00184	Myod1	LGS13:Photo_BC	0	3.40278	0.994	0.506	0
M00066	Tal1,Tcf3	LGS13:Photo_BC	0	8.81979	1	0.513	0
M00065	Tal1,Tcf3	LGS13:Photo_BC	0	8.28703	1	0.514	0
M01428	Gsc	LGS13:Photo_BC	0	4.26019	0.961	0.475	0
M07422	Ascl1	LGS13:Photo_BC	0	4.22642	0.998	0.512	0
M04039	Tgif1	LGS13:Photo_BC	0	2.05441	0.933	0.45	0
M00002	Tcf3	LGS13:Photo_BC	0	3.33088	0.991	0.509	0
M07055	Pitx1	LGS13:Photo_BC	0	3.38125	0.957	0.475	0
M00693	Tcf3	LGS13:Photo_BC	0	2.48465	0.964	0.483	0
M01484	Pitx1	LGS13:Photo_BC	0	4.245	0.952	0.475	0
M10264	Tcf12	LGS13:Photo_BC	0	2.88991	0.993	0.516	0
M00804	Myf6,Myod1,Tcf3	LGS13:Photo_BC	0	2.36494	0.964	0.488	0
M09721	Tcf3	LGS13:Photo_BC	0	2.11927	0.963	0.489	0
M04428	Pitx1	LGS13:Photo_BC	0	4.13564	0.947	0.474	0
M04040	Tgif2lx1	LGS13:Photo_BC	0	2.01611	0.941	0.468	0
M04422	Otx1	LGS13:Photo_BC	0	3.7334	0.934	0.462	0
M01735	Pitx3	LGS13:Photo_BC	0	3.04776	0.946	0.475	0
M04420	Otx2	LGS13:Photo_BC	0	3.80225	0.933	0.463	0
M03838	Otx1	LGS13:Photo_BC	0	2.63795	0.932	0.472	0
M06956	Prrxl1	LGS13:Photo_BC	0	2.16448	0.91	0.457	0
M00929	Myf6,Myod1,Tcf3	LGS13:Photo_BC	0	2.17521	0.961	0.508	0
M08477	Foxj2,Pitx1	LGS13:Photo_BC	0	2.33998	0.927	0.476	0
M04423	Otx1	LGS13:Photo_BC	0	2.90709	0.92	0.472	0
M06984	Rax	LGS13:Photo_BC	0	2.07187	0.909	0.461	0
M06926	Arx	LGS13:Photo_BC	0	2.10275	0.904	0.457	0
M06932	Shox2	LGS13:Photo_BC	0	2.01378	0.904	0.459	0
M08733	Hoxa3,Pitx1	LGS13:Photo_BC	0	2.27505	0.918	0.477	0
M00001	Myod1	LGS13:Photo_BC	0	2.20364	0.947	0.509	0
M01826	Pitx1	LGS13:Photo_BC	0	2.04952	0.908	0.478	0
M10002	Nfic	LGS13:Photo_BC	0	2.18126	0.808	0.443	0
M09640	Nfic	LGS13:Photo_BC	0	2.28996	0.802	0.443	0
M09680	Crx	LGS13:Photo_BC	0	4.91613	0.958	0.473	0
M04505	Pitx1	LGS13:Photo_BC	0	4.29015	0.961	0.474	0
M04421	Otx2	LGS13:Photo_BC	0	3.84396	0.942	0.473	0
M04418	Otx1	LGS13:Photo_BC	0	3.36569	0.916	0.463	1.02896e-307
M01712	Crx	LGS13:Photo_BC	0	3.55589	0.938	0.474	9.35859e-306
M04623	Otx2	LGS13:Photo_BC	3.62232e-301	4.44538	0.957	0.475	1.65105e-297
M10338	Pitx1	LGS13:Photo_BC	5.30267e-301	4.30434	0.952	0.475	2.41696e-297
M01719	Otx2	LGS13:Photo_BC	1.61589e-299	3.77716	0.94	0.474	7.36523e-296
M04058	Nfix	LGS13:Photo_BC	1.24783e-292	2.29173	0.746	0.443	5.68761e-289
M01436	Crx	LGS13:Photo_BC	6.86409e-292	3.87578	0.951	0.472	3.12865e-288
M04305	Dmbx1	LGS13:Photo_BC	5.24307e-291	3.94779	0.942	0.474	2.38979e-287
M07411	Nfia	LGS13:Photo_BC	2.87171e-290	2.09271	0.756	0.444	1.30892e-286
M04057	Nfib	LGS13:Photo_BC	2.02205e-282	2.22221	0.743	0.444	9.2165e-279
M07081	Crx	LGS13:Photo_BC	2.13071e-282	4.57789	0.954	0.474	9.71179e-279
M04326	Gsc	LGS13:Photo_BC	5.24367e-281	4.12315	0.948	0.475	2.39006e-277
M01343	Pitx3	LGS13:Photo_BC	1.31923e-278	3.69535	0.946	0.473	6.01306e-275
M00623	Crx,Rax	LGS13:Photo_BC	1.98207e-278	2.66621	0.922	0.475	9.03428e-275
M00127	Gata1	LGS13:Photo_BC	1.00643e-277	2.09565	0.907	0.473	4.5873e-274
M09888	Crx	LGS13:Photo_BC	1.01804e-277	4.55191	0.949	0.473	4.64022e-274
M10201	Crx	LGS13:Photo_BC	1.01804e-277	4.55191	0.949	0.473	4.64022e-274
M04056	Nfia	LGS13:Photo_BC	2.48346e-277	2.15588	0.74	0.445	1.13196e-273
M04429	Pitx3	LGS13:Photo_BC	4.87538e-275	4.20961	0.955	0.474	2.2222e-271
M04325	Gsc2	LGS13:Photo_BC	2.22526e-274	4.04781	0.947	0.474	1.01427e-270
M10021	Otx2	LGS13:Photo_BC	2.89565e-274	4.72589	0.944	0.475	1.31984e-270
M07392	Pitx3	LGS13:Photo_BC	6.97989e-270	2.91454	0.929	0.474	3.18143e-266
M08895	Pitx1,Pitx2,Pitx3	LGS13:Photo_BC	3.23758e-259	4.041	0.957	0.474	1.47569e-255
M07352	Crx	LGS13:Photo_BC	6.80585e-257	3.80943	0.934	0.473	3.1021e-253
M01229	Gtf2ird1	LGS13:Photo_BC	1.66325e-236	2.34105	0.916	0.474	7.58108e-233
M10070	Sox9	LGS13:Late_RPCs	0	7.83692	0.999	0.149	0
M10374	Sox9	LGS13:Late_RPCs	0	7.83692	0.999	0.149	0
M10065	Sox10	LGS13:Late_RPCs	0	7.21402	0.999	0.156	0
M10371	Sox10	LGS13:Late_RPCs	0	7.21402	0.999	0.156	0
M08838	Sox9	LGS13:Late_RPCs	0	6.18273	0.999	0.176	0
M07127	Sox3	LGS13:Late_RPCs	0	5.66854	0.998	0.215	0
M07128	Sox6	LGS13:Late_RPCs	0	5.63681	0.998	0.216	0
M10067	Sox2	LGS13:Late_RPCs	0	5.83896	0.999	0.219	0
M10068	Sox3	LGS13:Late_RPCs	0	6.14779	0.999	0.219	0
M09709	Sox3	LGS13:Late_RPCs	0	5.80479	0.999	0.22	0
M04004	Sox9	LGS13:Late_RPCs	0	5.50806	0.997	0.22	0
M09787	Sox13	LGS13:Late_RPCs	0	5.44822	0.997	0.225	0
M10069	Sox4	LGS13:Late_RPCs	0	5.48767	0.998	0.226	0
M10373	Sox4	LGS13:Late_RPCs	0	5.48767	0.998	0.226	0
M02795	Sox11	LGS13:Late_RPCs	0	5.24304	0.998	0.227	0
M08899	Hbp1,Sox1,Sox10,Sox11,Sox13,Sox15,Sox17,Sox18,Sox2,Sox21,Sox3,Sox30,Sox4,Sox5,Sox6,Sox7,Sox8,Sox9,Sry	LGS13:Late_RPCs	0	5.47385	0.997	0.226	0
M08973	Sox2	LGS13:Late_RPCs	0	5.29344	0.997	0.226	0
M08972	Sox17	LGS13:Late_RPCs	0	5.17595	0.995	0.226	0
M08971	Sox15	LGS13:Late_RPCs	0	4.94644	0.997	0.229	0
M07225	Sox2	LGS13:Late_RPCs	0	5.14295	0.997	0.231	0
M01308	Sox4	LGS13:Late_RPCs	0	4.98285	0.996	0.233	0
M03138	Sox10	LGS13:Late_RPCs	0	4.3687	0.997	0.235	0
M00410	Sox9	LGS13:Late_RPCs	0	4.83401	0.995	0.239	0
M01016	Sox17	LGS13:Late_RPCs	0	4.55563	0.996	0.241	0
M09819	Sox10	LGS13:Late_RPCs	0	4.70288	0.997	0.244	0
M03847	Sox15	LGS13:Late_RPCs	0	4.52066	0.995	0.245	0
M07308	Sox2	LGS13:Late_RPCs	0	4.33676	0.994	0.246	0
M08970	Sox10	LGS13:Late_RPCs	0	4.66904	0.994	0.246	0
M08975	Sox6	LGS13:Late_RPCs	0	4.51088	0.992	0.244	0
M01590	Smad1	LGS13:Late_RPCs	0	4.16376	0.994	0.25	0
M02116	Sox10	LGS13:Late_RPCs	0	4.24862	0.993	0.249	0
M07432	Sox2	LGS13:Late_RPCs	0	4.1408	0.993	0.25	0
M07614	Sox4	LGS13:Late_RPCs	0	4.18009	0.993	0.25	0
M02804	Sox30	LGS13:Late_RPCs	0	4.37025	0.993	0.252	0
M03886	Sox2	LGS13:Late_RPCs	0	4.16896	0.994	0.253	0
M08976	Sry	LGS13:Late_RPCs	0	4.36637	0.991	0.25	0
M01284	Sox9	LGS13:Late_RPCs	0	4.46352	0.994	0.254	0
M07269	Sox9	LGS13:Late_RPCs	0	4.05432	0.993	0.256	0
M02902	Sox14,Sox4	LGS13:Late_RPCs	0	4.23345	0.994	0.259	0
M01272	Sox2	LGS13:Late_RPCs	0	4.09181	0.992	0.258	0
M08974	Sox5	LGS13:Late_RPCs	0	4.17337	0.99	0.256	0
M03803	Sox17	LGS13:Late_RPCs	0	3.82598	0.991	0.259	0
M03849	Sox4	LGS13:Late_RPCs	0	3.45547	0.99	0.262	0
M02917	Sry	LGS13:Late_RPCs	0	4.16078	0.99	0.264	0
M04837	Nanog	LGS13:Late_RPCs	0	3.75958	0.99	0.267	0
M04291	Barx1	LGS13:Late_RPCs	0	4.7736	0.993	0.272	0
M07307	Sox18	LGS13:Late_RPCs	0	3.83779	0.989	0.269	0
M03888	Sox6	LGS13:Late_RPCs	0	3.63506	0.988	0.271	0
M03823	Foxo1	LGS13:Late_RPCs	0	3.12371	0.984	0.271	0
M03854	Sry	LGS13:Late_RPCs	0	3.12371	0.984	0.271	0
M10066	Sox17	LGS13:Late_RPCs	0	3.73974	0.986	0.276	0
M01247	Nanog	LGS13:Late_RPCs	0	3.35857	0.983	0.275	0
M07309	Sox7	LGS13:Late_RPCs	0	3.76607	0.985	0.278	0
M01162	Nobox	LGS13:Late_RPCs	0	5.1018	0.997	0.292	0
M01393	Msx2	LGS13:Late_RPCs	0	4.68169	0.994	0.295	0
M07431	Sox11	LGS13:Late_RPCs	0	3.31179	0.982	0.283	0
M04091	Pou6f2	LGS13:Late_RPCs	0	5.67445	0.996	0.298	0
M02807	Sox7	LGS13:Late_RPCs	0	3.40807	0.982	0.285	0
M04294	Barhl1	LGS13:Late_RPCs	0	4.33094	0.991	0.295	0
M04384	Lbx2	LGS13:Late_RPCs	0	5.43043	0.995	0.3	0
M10282	Lhx2	LGS13:Late_RPCs	0	5.46307	0.996	0.301	0
M01462	Pou6f1	LGS13:Late_RPCs	0	4.3278	0.991	0.3	0
M04390	Lhx9	LGS13:Late_RPCs	0	5.46252	0.996	0.305	0
M04433	Prrx2	LGS13:Late_RPCs	0	5.46252	0.996	0.305	0
M04439	Shox2	LGS13:Late_RPCs	0	5.46252	0.996	0.305	0
M07268	Sox4	LGS13:Late_RPCs	0	3.31294	0.981	0.29	0
M01479	Pou6f1	LGS13:Late_RPCs	0	4.78245	0.994	0.304	0
M04324	Gbx2	LGS13:Late_RPCs	0	4.63348	0.993	0.304	0
M04288	Barhl2	LGS13:Late_RPCs	0	4.15067	0.99	0.303	0
M08024	Pou6f2	LGS13:Late_RPCs	0	4.93727	0.994	0.307	0
M01331	Isx	LGS13:Late_RPCs	0	4.34353	0.99	0.305	0
M04327	Gsx1	LGS13:Late_RPCs	0	5.54578	0.996	0.312	0
M01349	Mnx1	LGS13:Late_RPCs	0	4.41218	0.992	0.309	0
M01444	Phox2a	LGS13:Late_RPCs	0	4.88784	0.994	0.312	0
M02907	Sox21	LGS13:Late_RPCs	0	3.22395	0.975	0.294	0
M02799	Sox15	LGS13:Late_RPCs	0	3.1645	0.974	0.294	0
M04328	Gsx2	LGS13:Late_RPCs	0	5.04816	0.995	0.315	0
M01382	Gbx2	LGS13:Late_RPCs	0	4.76758	0.993	0.314	0
M01014	Sox10,Sox11,Sox12,Sox13,Sox14,Sox15,Sox18,Sox2,Sox21,Sox3,Sox4,Sox5,Sox6,Sox8,Sox9,Sry	LGS13:Late_RPCs	0	3.21849	0.978	0.3	0
M04316	En1	LGS13:Late_RPCs	0	5.72527	0.996	0.318	0
M04417	Noto	LGS13:Late_RPCs	0	5.30062	0.995	0.317	0
M00148	Sry	LGS13:Late_RPCs	0	2.91545	0.971	0.294	0
M04329	Gbx1	LGS13:Late_RPCs	0	5.05602	0.994	0.317	0
M04381	Isx	LGS13:Late_RPCs	0	5.26394	0.994	0.317	0
M04431	Prrx1	LGS13:Late_RPCs	0	5.26394	0.994	0.317	0
M04441	Shox2	LGS13:Late_RPCs	0	5.26394	0.994	0.317	0
M07994	Lbx1	LGS13:Late_RPCs	0	4.93423	0.994	0.317	0
M01441	Nobox	LGS13:Late_RPCs	0	4.61017	0.991	0.315	0
M08949	Lhx6	LGS13:Late_RPCs	0	4.89312	0.994	0.318	0
M04385	Lhx2	LGS13:Late_RPCs	0	5.16359	0.995	0.32	0
M07398	Pou4f2	LGS13:Late_RPCs	0	4.22531	0.991	0.316	0
M02796	Sox12	LGS13:Late_RPCs	0	3.01351	0.973	0.299	0
M04292	Bsx	LGS13:Late_RPCs	0	4.14591	0.988	0.315	0
M04322	Gbx1	LGS13:Late_RPCs	0	4.84113	0.993	0.32	0
M04405	Msx1	LGS13:Late_RPCs	0	4.14591	0.988	0.315	0
M04407	Msx2	LGS13:Late_RPCs	0	4.14591	0.988	0.315	0
M09976	Lhx2	LGS13:Late_RPCs	0	5.14184	0.995	0.322	0
M02191	Sox17	LGS13:Late_RPCs	0	3.22357	0.978	0.308	0
M01327	Vax2	LGS13:Late_RPCs	0	4.93942	0.995	0.326	0
M01412	Msx1	LGS13:Late_RPCs	0	4.30131	0.988	0.32	0
M02246	Sox2	LGS13:Late_RPCs	0	2.86595	0.973	0.306	0
M10283	Lhx3	LGS13:Late_RPCs	0	4.42493	0.99	0.323	0
M04344	Hoxa2	LGS13:Late_RPCs	0	4.4985	0.992	0.326	0
M01371	Gbx1	LGS13:Late_RPCs	0	4.27846	0.99	0.325	0
M02944	Alx4	LGS13:Late_RPCs	0	4.71909	0.992	0.328	0
M04424	Pdx1	LGS13:Late_RPCs	0	3.73263	0.984	0.32	0
M01339	Pax7	LGS13:Late_RPCs	0	4.5463	0.992	0.329	0
M01417	Alx4	LGS13:Late_RPCs	0	4.69394	0.991	0.329	0
M08912	En1	LGS13:Late_RPCs	0	4.70225	0.992	0.331	0
M07319	Foxd3	LGS13:Late_RPCs	0	2.73056	0.965	0.305	0
M04348	Hoxb3	LGS13:Late_RPCs	0	4.78472	0.994	0.335	0
M04393	Lmx1b	LGS13:Late_RPCs	0	4.82493	0.991	0.332	0
M04443	Uncx	LGS13:Late_RPCs	0	4.82493	0.991	0.332	0
M04279	Alx3	LGS13:Late_RPCs	0	4.39	0.991	0.333	0
M04402	Mixl1	LGS13:Late_RPCs	0	4.69181	0.992	0.334	0
M00160	Sry	LGS13:Late_RPCs	0	2.77517	0.97	0.313	0
M04319	Esx1	LGS13:Late_RPCs	0	4.74197	0.991	0.334	0
M04435	Rax	LGS13:Late_RPCs	0	4.38052	0.988	0.331	0
M01461	Emx2	LGS13:Late_RPCs	0	4.6979	0.993	0.337	0
M04318	En2	LGS13:Late_RPCs	0	3.81209	0.985	0.329	0
M04415	Nkx6-1	LGS13:Late_RPCs	0	4.48564	0.989	0.333	0
M01427	Nkx1-2	LGS13:Late_RPCs	0	4.21679	0.991	0.336	0
M01470	Nkx6-3	LGS13:Late_RPCs	0	3.75801	0.981	0.326	0
M04396	Lhx8	LGS13:Late_RPCs	0	4.91907	0.992	0.338	0
M01365	En1	LGS13:Late_RPCs	0	4.30304	0.988	0.335	0
M04312	Emx1	LGS13:Late_RPCs	0	4.41959	0.99	0.337	0
M04416	Nkx6-2	LGS13:Late_RPCs	0	4.73546	0.992	0.339	0
M01233	Pdx1	LGS13:Late_RPCs	0	4.37632	0.99	0.338	0
M07338	Sox10	LGS13:Late_RPCs	0	2.91917	0.971	0.319	0
M01131	Sox10	LGS13:Late_RPCs	0	2.67286	0.969	0.318	0
M04311	Dlx2	LGS13:Late_RPCs	0	3.60284	0.977	0.326	0
M01408	Pou4f3	LGS13:Late_RPCs	0	3.27924	0.976	0.326	0
M07425	Msx2	LGS13:Late_RPCs	0	4.61702	0.99	0.341	0
M02288	Plac8	LGS13:Late_RPCs	0	4.61702	0.99	0.341	0
M01334	Nkx1-1	LGS13:Late_RPCs	0	3.48316	0.982	0.335	0
M01335	Vsx1	LGS13:Late_RPCs	0	4.00093	0.984	0.337	0
M01415	Shox2	LGS13:Late_RPCs	0	4.52457	0.989	0.342	0
M01431	Barx2	LGS13:Late_RPCs	0	3.52684	0.978	0.331	0
M01475	Evx1	LGS13:Late_RPCs	0	4.45389	0.991	0.344	0
M04349	Hoxb5	LGS13:Late_RPCs	0	4.45723	0.99	0.343	0
M04365	Hoxd8	LGS13:Late_RPCs	0	3.79618	0.984	0.337	0
M08003	Pou6f1	LGS13:Late_RPCs	0	3.87185	0.984	0.337	0
M04451	Vsx2	LGS13:Late_RPCs	0	4.02105	0.985	0.339	0
M08015	Vsx1	LGS13:Late_RPCs	0	4.02105	0.985	0.339	0
M01486	Dlx4	LGS13:Late_RPCs	0	3.35248	0.978	0.333	0
M02801	Sox18	LGS13:Late_RPCs	0	2.72576	0.966	0.321	0
M04330	Hesx1	LGS13:Late_RPCs	0	4.28808	0.988	0.343	0
M07385	Lhx2	LGS13:Late_RPCs	0	4.60115	0.992	0.348	0
M01594	Foxa1,Foxa2,Tcf3	LGS13:Late_RPCs	0	2.61144	0.962	0.319	0
M07047	Lhx2	LGS13:Late_RPCs	0	4.07534	0.992	0.349	0
M01325	Lhx2	LGS13:Late_RPCs	0	4.39652	0.992	0.35	0
M00241	Nkx2-5	LGS13:Late_RPCs	0	3.39831	0.977	0.336	0
M04333	Hmx1	LGS13:Late_RPCs	0	3.04186	0.968	0.327	0
M04387	Lhx6	LGS13:Late_RPCs	0	4.26873	0.988	0.347	0
M01455	En2	LGS13:Late_RPCs	0	4.26628	0.989	0.349	0
M04368	Hoxa2	LGS13:Late_RPCs	0	4.2147	0.987	0.347	0
M00042	Sox5	LGS13:Late_RPCs	0	2.6662	0.96	0.32	0
M01332	Barhl1	LGS13:Late_RPCs	0	3.63835	0.98	0.34	0
M01367	Lhx9	LGS13:Late_RPCs	0	3.80255	0.982	0.342	0
M01396	Hoxb7	LGS13:Late_RPCs	0	3.62213	0.98	0.341	0
M04299	Dlx1	LGS13:Late_RPCs	0	3.58395	0.98	0.341	0
M04300	Dlx2	LGS13:Late_RPCs	0	3.23946	0.968	0.329	0
M04301	Dlx3	LGS13:Late_RPCs	0	3.23946	0.968	0.329	0
M04302	Dlx4	LGS13:Late_RPCs	0	3.23946	0.968	0.329	0
M04310	Dlx1	LGS13:Late_RPCs	0	3.23946	0.968	0.329	0
M04394	Lhx4	LGS13:Late_RPCs	0	4.0908	0.984	0.345	0
M04614	Pdx1	LGS13:Late_RPCs	0	3.65404	0.98	0.341	0
M08041	Dlx1	LGS13:Late_RPCs	0	3.58395	0.98	0.341	0
M08042	Dlx3	LGS13:Late_RPCs	0	3.23946	0.968	0.329	0
M08043	Dlx4	LGS13:Late_RPCs	0	3.23946	0.968	0.329	0
M01354	Pou2f1	LGS13:Late_RPCs	0	3.6903	0.982	0.344	0
M01423	Arx	LGS13:Late_RPCs	0	4.00308	0.987	0.349	0
M04403	Mnx1	LGS13:Late_RPCs	0	4.11565	0.986	0.348	0
M01401	Lbx2	LGS13:Late_RPCs	0	4.01299	0.989	0.352	0
M01477	Pou3f2	LGS13:Late_RPCs	0	3.96195	0.986	0.349	0
M04373	Hoxd3	LGS13:Late_RPCs	0	4.42496	0.989	0.352	0
M09975	Lef1	LGS13:Late_RPCs	0	2.57893	0.962	0.325	0
M10281	Lef1	LGS13:Late_RPCs	0	2.57893	0.962	0.325	0
M04314	Emx2	LGS13:Late_RPCs	0	4.14189	0.987	0.351	0
M01489	Nkx6-1	LGS13:Late_RPCs	0	3.36342	0.975	0.339	0
M07605	Lef1	LGS13:Late_RPCs	0	2.58686	0.954	0.318	0
M01370	Hoxa4	LGS13:Late_RPCs	0	3.48774	0.978	0.343	0
M01389	Rax	LGS13:Late_RPCs	0	4.15279	0.988	0.353	0
M01400	Dlx3	LGS13:Late_RPCs	0	3.07068	0.972	0.337	0
M02866	Hbp1	LGS13:Late_RPCs	0	2.60527	0.964	0.33	0
M10337	Pdx1	LGS13:Late_RPCs	0	3.09968	0.968	0.334	0
M01439	Dlx1	LGS13:Late_RPCs	0	3.78251	0.983	0.35	0
M04445	Uncx	LGS13:Late_RPCs	0	4.43771	0.987	0.354	0
M08770	Hoxa3	LGS13:Late_RPCs	0	4.20333	0.989	0.356	0
M01337	Hoxa3	LGS13:Late_RPCs	0	4.23601	0.988	0.356	0
M04343	Hoxa1	LGS13:Late_RPCs	0	4.47591	0.99	0.358	0
M04392	Lmx1a	LGS13:Late_RPCs	0	4.27732	0.986	0.354	0
M01336	Hoxa7	LGS13:Late_RPCs	0	3.5007	0.977	0.346	0
M01424	Hoxb4	LGS13:Late_RPCs	0	3.71713	0.98	0.349	0
M04399	Meox2	LGS13:Late_RPCs	0	3.89233	0.985	0.354	0
M04398	Meox1	LGS13:Late_RPCs	0	4.15031	0.987	0.357	0
M01474	Esx1	LGS13:Late_RPCs	0	4.17008	0.988	0.359	0
M04335	Hmx3	LGS13:Late_RPCs	0	2.95785	0.966	0.337	0
M04395	Lhx8	LGS13:Late_RPCs	0	3.21732	0.97	0.341	0
M07988	Emx1	LGS13:Late_RPCs	0	4.20418	0.989	0.361	0
M01469	Nkx6-1	LGS13:Late_RPCs	0	3.18175	0.969	0.341	0
M08773	Hoxa7	LGS13:Late_RPCs	0	3.17286	0.966	0.338	0
M08902	Foxa1,Foxa2,Lef1,Tcf3,Tcf7	LGS13:Late_RPCs	0	2.49001	0.952	0.324	0
M00099	Prrx2	LGS13:Late_RPCs	0	4.01564	0.986	0.359	0
M04304	Dlx6	LGS13:Late_RPCs	0	3.58945	0.978	0.351	0
M04386	Lhx2	LGS13:Late_RPCs	0	3.44556	0.978	0.352	0
M01340	Barx1	LGS13:Late_RPCs	0	3.09903	0.969	0.343	0
M01388	Dlx5	LGS13:Late_RPCs	0	3.03109	0.966	0.34	0
M01394	Hoxa7	LGS13:Late_RPCs	0	3.36428	0.972	0.347	0
M04347	Hoxb2	LGS13:Late_RPCs	0	4.23924	0.989	0.364	0
M04388	Lhx6	LGS13:Late_RPCs	0	3.09866	0.966	0.341	0
M01481	Hmx1	LGS13:Late_RPCs	0	2.90038	0.963	0.339	0
M01376	Prrx2	LGS13:Late_RPCs	0	4.18712	0.988	0.366	0
M01446	Barhl2	LGS13:Late_RPCs	0	3.04732	0.968	0.346	0
M01458	Uncx	LGS13:Late_RPCs	0	3.61407	0.977	0.356	0
M08785	Sox6	LGS13:Late_RPCs	0	2.49818	0.955	0.334	0
M02900	Sox12	LGS13:Late_RPCs	0	2.40486	0.956	0.336	0
M01356	Phox2b	LGS13:Late_RPCs	0	3.40842	0.975	0.356	0
M04425	Pdx1	LGS13:Late_RPCs	0	3.92138	0.982	0.363	0
M04446	Vax1	LGS13:Late_RPCs	0	3.63776	0.98	0.361	0
M04447	Vax2	LGS13:Late_RPCs	0	3.63776	0.98	0.361	0
M07603	Dlx3	LGS13:Late_RPCs	0	3.23406	0.974	0.355	0
M01320	Prop1	LGS13:Late_RPCs	0	3.57695	0.977	0.359	0
M01391	Pax6	LGS13:Late_RPCs	0	3.25325	0.976	0.358	0
M01438	Pdx1	LGS13:Late_RPCs	0	3.89537	0.986	0.368	0
M04400	Meox2	LGS13:Late_RPCs	0	3.29292	0.974	0.356	0
M04450	Vsx1	LGS13:Late_RPCs	0	3.49708	0.978	0.36	0
M01418	Lhx1	LGS13:Late_RPCs	0	3.21122	0.971	0.355	0
M01360	Dbx2	LGS13:Late_RPCs	0	2.90315	0.963	0.349	0
M01409	Lmx1a	LGS13:Late_RPCs	0	2.88073	0.964	0.351	0
M00437	Vsx2	LGS13:Late_RPCs	0	3.72293	0.981	0.369	0
M01348	Prrx1	LGS13:Late_RPCs	0	3.65358	0.979	0.367	0
M01451	Hoxb8	LGS13:Late_RPCs	0	2.65667	0.956	0.344	0
M01355	Alx3	LGS13:Late_RPCs	0	3.95466	0.984	0.373	0
M02808	Sox8	LGS13:Late_RPCs	0	2.35782	0.947	0.336	0
M01022	Lef1	LGS13:Late_RPCs	0	2.46444	0.935	0.325	0
M01385	Pax4	LGS13:Late_RPCs	0	3.89782	0.984	0.375	0
M08981	Vsx1	LGS13:Late_RPCs	0	3.96567	0.983	0.374	0
M10372	Sox2	LGS13:Late_RPCs	0	2.23515	0.949	0.34	0
M01363	Lmx1b	LGS13:Late_RPCs	0	2.85285	0.961	0.353	0
M08719	Hoxb2	LGS13:Late_RPCs	0	2.31224	0.951	0.343	0
M01235	Pdx1	LGS13:Late_RPCs	0	3.56597	0.977	0.37	0
M01330	Hoxb3	LGS13:Late_RPCs	0	3.84755	0.986	0.379	0
M07399	Nkx6-1	LGS13:Late_RPCs	0	3.14513	0.968	0.361	0
M01323	Otp	LGS13:Late_RPCs	0	3.20048	0.97	0.364	0
M01353	Lhx5	LGS13:Late_RPCs	0	3.0792	0.969	0.363	0
M07278	Dlx3	LGS13:Late_RPCs	0	2.67157	0.957	0.351	0
M01326	Gsx2	LGS13:Late_RPCs	0	3.93606	0.986	0.381	0
M01448	Hoxd1	LGS13:Late_RPCs	0	3.98949	0.986	0.381	0
M01338	Hoxd3	LGS13:Late_RPCs	0	3.49817	0.98	0.376	0
M01452	Hoxa5	LGS13:Late_RPCs	0	3.79339	0.984	0.38	0
M01319	Hoxb5	LGS13:Late_RPCs	0	3.55487	0.981	0.378	0
M00510	Lhx3	LGS13:Late_RPCs	0	3.07646	0.968	0.366	0
M02271	Hoxa5	LGS13:Late_RPCs	0	2.63707	0.957	0.355	0
M00978	Lef1,Tcf7	LGS13:Late_RPCs	0	2.42967	0.94	0.339	0
M01397	Vax1	LGS13:Late_RPCs	0	3.7999	0.984	0.383	0
M01471	Lhx3	LGS13:Late_RPCs	0	2.89359	0.964	0.365	0
M01392	Hoxa6	LGS13:Late_RPCs	0	2.99143	0.972	0.375	0
M01386	Evx2	LGS13:Late_RPCs	0	3.38925	0.973	0.379	0
M01468	Dlx2	LGS13:Late_RPCs	0	2.71736	0.958	0.367	0
M04331	Hesx1	LGS13:Late_RPCs	0	2.47167	0.95	0.36	0
M04855	Irf4	LGS13:Late_RPCs	0	2.29438	0.942	0.353	0
M01460	Hoxb6	LGS13:Late_RPCs	0	2.47563	0.943	0.357	0
M07386	Lmx1a,Lmx1b	LGS13:Late_RPCs	0	2.64913	0.954	0.368	0
M01421	Lhx4	LGS13:Late_RPCs	0	3.30905	0.973	0.388	0
M04320	Evx1	LGS13:Late_RPCs	0	3.02626	0.963	0.378	0
M04334	Hmx2	LGS13:Late_RPCs	0	2.43191	0.939	0.355	0
M01402	Hoxa2	LGS13:Late_RPCs	0	3.43246	0.976	0.393	0
M04321	Evx2	LGS13:Late_RPCs	0	3.09815	0.965	0.383	0
M04408	Meox2	LGS13:Late_RPCs	0	3.03635	0.963	0.381	0
M01013	Pdx1	LGS13:Late_RPCs	0	2.27352	0.937	0.356	0
M01487	Hoxa1	LGS13:Late_RPCs	0	3.49413	0.979	0.399	0
M04303	Dlx5	LGS13:Late_RPCs	0	2.42643	0.944	0.364	0
M08772	Hoxa6	LGS13:Late_RPCs	0	2.66592	0.947	0.367	0
M01255	Pdx1	LGS13:Late_RPCs	0	2.13085	0.933	0.357	0
M02051	Dlx3	LGS13:Late_RPCs	0	2.57406	0.948	0.372	0
M01413	Hmx3	LGS13:Late_RPCs	0	2.34167	0.936	0.361	0
M00640	Hoxa4	LGS13:Late_RPCs	0	2.27235	0.942	0.367	0
M04391	Lhx9	LGS13:Late_RPCs	0	2.3427	0.94	0.365	0
M01971	Lhx3	LGS13:Late_RPCs	0	2.62289	0.948	0.377	0
M07978	Arid3b	LGS13:Late_RPCs	0	2.33617	0.935	0.367	0
M03827	Foxa1	LGS13:Late_RPCs	0	2.03624	0.921	0.356	0
M01465	Pou1f1	LGS13:Late_RPCs	0	2.31519	0.937	0.373	0
M04404	Msx1	LGS13:Late_RPCs	0	2.29128	0.938	0.375	0
M07035	Ctnnb1	LGS13:Late_RPCs	0	2.00188	0.914	0.354	0
M01442	Bsx	LGS13:Late_RPCs	0	2.50623	0.945	0.387	0
M02033	Tcf4	LGS13:Late_RPCs	0	2.00461	0.907	0.355	0
M01473	Pou3f4	LGS13:Late_RPCs	0	2.26989	0.931	0.381	0
M01440	Lhx8	LGS13:Late_RPCs	0	2.62209	0.948	0.398	0
M01443	Meox1	LGS13:Late_RPCs	0	2.68348	0.951	0.403	0
M01654	Arid3a	LGS13:Late_RPCs	0	2.42038	0.952	0.404	0
M03546	Dlx5	LGS13:Late_RPCs	0	2.42038	0.952	0.404	0
M01315	Hmx2	LGS13:Late_RPCs	0	2.03123	0.917	0.371	0
M01316	Pou3f1	LGS13:Late_RPCs	0	2.19968	0.93	0.385	0
M01314	Lhx6	LGS13:Late_RPCs	0	3.00739	0.968	0.423	0
M08822	Msx1	LGS13:Late_RPCs	0	2.28364	0.931	0.387	0
M02735	Arid3a	LGS13:Late_RPCs	0	2.05821	0.921	0.38	0
M04317	En1	LGS13:Late_RPCs	0	2.25082	0.93	0.395	0
M04406	Msx2	LGS13:Late_RPCs	0	2.03786	0.914	0.385	0
M09669	Tcf4,Tcf7l2	LGS13:Late_RPCs	0	2.00875	0.883	0.356	0
M01328	Isl2	LGS13:Late_RPCs	0	2.13522	0.923	0.4	0
M10411	Vsx2	LGS13:Late_RPCs	0	2.63919	0.944	0.423	0
M01234	Pdx1	LGS13:Late_RPCs	0	2.18404	0.924	0.405	0
M01422	Lhx6	LGS13:Late_RPCs	0	2.13097	0.909	0.445	0
M04380	Isx	LGS13:Late_RPCs	0	2.14379	0.919	0.461	0
M04085	Pou4f1	LGS13:RGC	0	13.7671	0.996	0.373	0
M04087	Pou4f3	LGS13:RGC	0	13.7407	0.997	0.376	0
M04086	Pou4f2	LGS13:RGC	0	10.9736	0.995	0.392	0
M04068	Pou1f1	LGS13:RGC	0	12.0224	0.995	0.394	0
M04077	Pou3f1	LGS13:RGC	0	9.74355	0.997	0.402	0
M04081	Pou3f3	LGS13:RGC	0	8.07747	0.993	0.412	0
M04078	Pou3f2	LGS13:RGC	0	7.61694	0.995	0.415	0
M04084	Pou3f4	LGS13:RGC	0	7.65084	0.995	0.415	0
M00465	Pou6f1	LGS13:RGC	0	5.23385	0.986	0.436	0
M04337	Hnf1b	LGS13:RGC	0	5.64808	0.981	0.433	0
M00744	Pou1f1	LGS13:RGC	0	4.69823	0.99	0.446	0
M03090	Pou3f3	LGS13:RGC	0	4.30614	0.982	0.439	0
M01324	Pou3f3	LGS13:RGC	0	4.13782	0.981	0.44	0
M03559	Pou1f1	LGS13:RGC	0	4.45861	0.985	0.445	0
M10343	Pou3f2	LGS13:RGC	0	3.91318	0.988	0.448	0
M04338	Hnf1b	LGS13:RGC	0	4.69604	0.986	0.448	0
M10342	Pou3f1	LGS13:RGC	0	4.99292	0.982	0.445	0
M09946	Hnf1b	LGS13:RGC	0	4.38299	0.977	0.445	0
M10259	Hnf1b	LGS13:RGC	0	4.33407	0.975	0.444	0
M04075	Pou2f3	LGS13:RGC	0	3.54117	0.973	0.45	0
M03843	Pou4f1	LGS13:RGC	0	3.54454	0.972	0.452	0
M04082	Pou3f3	LGS13:RGC	0	3.44626	0.973	0.453	0
M04071	Pou2f1	LGS13:RGC	0	3.30896	0.968	0.449	0
M04073	Pou2f2	LGS13:RGC	0	3.17695	0.966	0.45	0
M06989	Zfp236	LGS13:RGC	0	3.11814	0.977	0.461	0
M07416	Cdx2,Cdx4	LGS13:RGC	0	3.17612	0.977	0.463	0
M01659	Cdx2,Cdx4	LGS13:RGC	0	3.08408	0.976	0.466	0
M02025	Mef2c	LGS13:RGC	0	3.37797	0.984	0.477	0
M08404	Gsc2,Pou2f1	LGS13:RGC	0	3.58154	0.97	0.463	0
M04065	Pax6	LGS13:RGC	0	3.00478	0.971	0.465	0
M00100	Cdx1	LGS13:RGC	0	2.98779	0.969	0.464	0
M04103	Rfx2	LGS13:RGC	0	3.12759	0.976	0.472	0
M05326	Sox3	LGS13:RGC	0	2.79418	0.968	0.465	0
M04097	Rfx3	LGS13:RGC	0	3.12256	0.972	0.472	0
M05297	Sox1	LGS13:RGC	0	2.95527	0.966	0.467	0
M04095	Rfx2	LGS13:RGC	0	3.18377	0.972	0.474	0
M04099	Rfx4	LGS13:RGC	0	2.99266	0.969	0.472	0
M00471	Tbp	LGS13:RGC	0	2.69359	0.973	0.478	0
M03564	Satb1	LGS13:RGC	0	2.43955	0.975	0.48	0
M07378	Cdx1,Cdx2,Cdx4	LGS13:RGC	0	2.63637	0.968	0.473	0
M00097	Pax6	LGS13:RGC	0	2.30593	0.952	0.457	0
M04105	Rfx3	LGS13:RGC	0	2.95307	0.968	0.474	0
M04101	Rfx5	LGS13:RGC	0	3.03488	0.968	0.476	0
M01855	Ahr	LGS13:RGC	0	2.23935	0.962	0.471	0
M10035	Pou3f2	LGS13:RGC	0	2.62544	0.96	0.469	0
M02789	Rfx4	LGS13:RGC	0	2.51589	0.961	0.472	0
M04102	Rfx5	LGS13:RGC	0	2.84233	0.963	0.476	0
M01432	Hoxd8	LGS13:RGC	0	2.91231	0.935	0.45	0
M04092	Pou2f2	LGS13:RGC	0	2.36432	0.942	0.458	0
M07452	Meis1	LGS13:RGC	0	2.60094	0.954	0.471	0
M01483	Dbx1	LGS13:RGC	0	2.70286	0.946	0.463	0
M04960	Pou5f1	LGS13:RGC	0	2.42309	0.949	0.468	0
M02788	Rfx3	LGS13:RGC	0	2.06704	0.947	0.469	0
M00281	Rfx1	LGS13:RGC	0	2.49854	0.951	0.474	0
M09002	Rfx2	LGS13:RGC	0	2.59171	0.957	0.48	0
M10356	Rfx3	LGS13:RGC	0	2.15773	0.953	0.477	0
M00145	Pou3f2	LGS13:RGC	0	2.41132	0.94	0.464	0
M10048	Rfx2	LGS13:RGC	0	2.25748	0.951	0.477	0
M04741	Srebf1	LGS13:RGC	0	2.32619	0.95	0.477	0
M07122	Rfx1	LGS13:RGC	0	2.37068	0.951	0.479	0
M07410	Rfx2	LGS13:RGC	0	2.33918	0.948	0.477	0
M09952	Hoxa9	LGS13:RGC	0	2.22484	0.936	0.466	0
M10265	Hoxa9	LGS13:RGC	0	2.22484	0.936	0.466	0
M04724	Mxi1	LGS13:RGC	0	2.3208	0.947	0.48	0
M00790	Hnf1b	LGS13:RGC	0	2.35882	0.928	0.464	0
M09651	Rfx2	LGS13:RGC	0	2.03225	0.938	0.478	0
M02790	Rfx7	LGS13:RGC	0	2.19918	0.938	0.48	0
M09832	Rfx1	LGS13:RGC	0	2.07286	0.928	0.479	0
M01742	Zscan10	LGS13:RGC	0	2.06469	0.917	0.468	0
M04059	Nrf1	LGS13:RGC	0	2.05072	0.911	0.462	0
M10355	Rfx2	LGS13:RGC	0	2.06082	0.931	0.484	0
M00803	E2f1,E2f2,E2f3,E2f4,Tfdp1	LGS13:RGC	0	2.00563	0.932	0.491	0
M01181	Nkx3-2	LGS13:RGC	0	2.02761	0.895	0.474	0
M01465	Pou1f1	LGS13:RGC	5.25231e-274	2.02655	0.856	0.445	2.394e-270
M01408	Pou4f3	LGS13:RGC	2.71148e-259	2.15044	0.845	0.41	1.23589e-255

## Sheet: Mouse_Motif
Motif_name	Gene_names	cluster	p_val	avg_diff	pct.1	pct.2	p_val_adj
M10065	Sox10	Mouse:Late_RPCs	0	6.62395	0.999	0.16	0
M10371	Sox10	Mouse:Late_RPCs	0	6.62395	0.999	0.16	0
M10070	Sox9	Mouse:Late_RPCs	0	6.8396	0.999	0.167	0
M10374	Sox9	Mouse:Late_RPCs	0	6.8396	0.999	0.167	0
M08838	Sox9	Mouse:Late_RPCs	0	5.36528	0.997	0.175	0
M04004	Sox9	Mouse:Late_RPCs	0	5.7291	0.999	0.205	0
M04144	Tead3	Mouse:Late_RPCs	0	4.67098	0.977	0.183	0
M09667	Tead4	Mouse:Late_RPCs	0	4.38811	0.977	0.183	0
M09787	Sox13	Mouse:Late_RPCs	0	5.54258	0.998	0.207	0
M01016	Sox17	Mouse:Late_RPCs	0	5.0675	0.999	0.209	0
M08972	Sox17	Mouse:Late_RPCs	0	5.44304	0.999	0.211	0
M08971	Sox15	Mouse:Late_RPCs	0	4.75641	0.997	0.21	0
M07128	Sox6	Mouse:Late_RPCs	0	6.27993	0.999	0.214	0
M08975	Sox6	Mouse:Late_RPCs	0	4.77743	0.996	0.214	0
M00410	Sox9	Mouse:Late_RPCs	0	5.03052	0.997	0.216	0
M10093	Tead4	Mouse:Late_RPCs	0	4.14596	0.971	0.19	0
M02795	Sox11	Mouse:Late_RPCs	0	4.76583	0.998	0.218	0
M04145	Tead4	Mouse:Late_RPCs	0	4.35892	0.973	0.193	0
M08899	Hbp1,Sox1,Sox10,Sox11,Sox13,Sox15,Sox17,Sox18,Sox2,Sox21,Sox3,Sox30,Sox4,Sox5,Sox6,Sox7,Sox8,Sox9,Sry	Mouse:Late_RPCs	0	5.72209	0.999	0.219	0
M07127	Sox3	Mouse:Late_RPCs	0	5.28182	0.999	0.222	0
M10067	Sox2	Mouse:Late_RPCs	0	5.54432	0.999	0.222	0
M08976	Sry	Mouse:Late_RPCs	0	4.49121	0.994	0.218	0
M01308	Sox4	Mouse:Late_RPCs	0	5.4512	0.998	0.223	0
M08973	Sox2	Mouse:Late_RPCs	0	5.25098	0.998	0.223	0
M04141	Tead1	Mouse:Late_RPCs	0	4.33494	0.973	0.199	0
M08974	Sox5	Mouse:Late_RPCs	0	4.29353	0.995	0.223	0
M09788	Tead2	Mouse:Late_RPCs	0	4.2059	0.969	0.197	0
M10069	Sox4	Mouse:Late_RPCs	0	4.99355	0.999	0.228	0
M10373	Sox4	Mouse:Late_RPCs	0	4.99355	0.999	0.228	0
M01305	Tead1,Tef	Mouse:Late_RPCs	0	4.08392	0.974	0.203	0
M08970	Sox10	Mouse:Late_RPCs	0	4.6438	0.996	0.229	0
M09709	Sox3	Mouse:Late_RPCs	0	5.82163	0.999	0.232	0
M10092	Tead1,Tef	Mouse:Late_RPCs	0	3.91999	0.966	0.199	0
M07432	Sox2	Mouse:Late_RPCs	0	3.91697	0.993	0.227	0
M10395	Tead1	Mouse:Late_RPCs	0	3.76646	0.968	0.202	0
M02804	Sox30	Mouse:Late_RPCs	0	4.08865	0.992	0.227	0
M07225	Sox2	Mouse:Late_RPCs	0	5.48789	0.998	0.233	0
M07308	Sox2	Mouse:Late_RPCs	0	3.9149	0.993	0.228	0
M10066	Sox17	Mouse:Late_RPCs	0	4.06969	0.993	0.228	0
M10068	Sox3	Mouse:Late_RPCs	0	6.1207	0.999	0.234	0
M07340	Tead1	Mouse:Late_RPCs	0	4.13497	0.973	0.21	0
M01590	Smad1	Mouse:Late_RPCs	0	3.89004	0.996	0.234	0
M03886	Sox2	Mouse:Late_RPCs	0	3.90356	0.993	0.231	0
M03803	Sox17	Mouse:Late_RPCs	0	3.97624	0.997	0.236	0
M07307	Sox18	Mouse:Late_RPCs	0	4.1604	0.992	0.231	0
M02917	Sry	Mouse:Late_RPCs	0	4.02879	0.991	0.231	0
M02116	Sox10	Mouse:Late_RPCs	0	4.17222	0.995	0.239	0
M03847	Sox15	Mouse:Late_RPCs	0	4.47567	0.993	0.237	0
M03849	Sox4	Mouse:Late_RPCs	0	3.16116	0.994	0.241	0
M10396	Tead2	Mouse:Late_RPCs	0	3.70025	0.962	0.21	0
M04837	Nanog	Mouse:Late_RPCs	0	3.81205	0.994	0.243	0
M09819	Sox10	Mouse:Late_RPCs	0	4.28227	0.995	0.244	0
M01272	Sox2	Mouse:Late_RPCs	0	3.54448	0.988	0.239	0
M02902	Sox14,Sox4	Mouse:Late_RPCs	0	4.31013	0.993	0.245	0
M01284	Sox9	Mouse:Late_RPCs	0	4.50785	0.996	0.251	0
M01817	Tead1	Mouse:Late_RPCs	0	3.73638	0.967	0.224	0
M03138	Sox10	Mouse:Late_RPCs	0	3.67123	0.995	0.253	0
M07309	Sox7	Mouse:Late_RPCs	0	3.73937	0.986	0.245	0
M03823	Foxo1	Mouse:Late_RPCs	0	2.81745	0.986	0.246	0
M03854	Sry	Mouse:Late_RPCs	0	2.81745	0.986	0.246	0
M07269	Sox9	Mouse:Late_RPCs	0	3.75474	0.992	0.253	0
M10397	Tead4	Mouse:Late_RPCs	0	3.45783	0.952	0.215	0
M02907	Sox21	Mouse:Late_RPCs	0	3.41032	0.979	0.246	0
M07614	Sox4	Mouse:Late_RPCs	0	3.3802	0.982	0.251	0
M00704	Tead1	Mouse:Late_RPCs	0	3.50077	0.976	0.249	0
M07480	Tead1,Tef	Mouse:Late_RPCs	0	3.50077	0.976	0.249	0
M02807	Sox7	Mouse:Late_RPCs	0	3.03858	0.975	0.25	0
M02796	Sox12	Mouse:Late_RPCs	0	3.02894	0.977	0.258	0
M02246	Sox2	Mouse:Late_RPCs	0	3.08187	0.98	0.262	0
M02799	Sox15	Mouse:Late_RPCs	0	3.00994	0.973	0.257	0
M03888	Sox6	Mouse:Late_RPCs	0	3.09017	0.978	0.262	0
M02096	Pdx1	Mouse:Late_RPCs	0	4.03125	0.987	0.272	0
M07431	Sox11	Mouse:Late_RPCs	0	2.83513	0.975	0.264	0
M01247	Nanog	Mouse:Late_RPCs	0	2.80923	0.976	0.268	0
M02191	Sox17	Mouse:Late_RPCs	0	3.22568	0.978	0.272	0
M07338	Sox10	Mouse:Late_RPCs	0	3.05753	0.974	0.272	0
M07268	Sox4	Mouse:Late_RPCs	0	2.92249	0.974	0.28	0
M04288	Barhl2	Mouse:Late_RPCs	0	3.71504	0.978	0.285	0
M04294	Barhl1	Mouse:Late_RPCs	0	3.81877	0.98	0.287	0
M00148	Sry	Mouse:Late_RPCs	0	2.55221	0.966	0.274	0
M01162	Nobox	Mouse:Late_RPCs	0	4.73578	0.993	0.305	0
M04291	Barx1	Mouse:Late_RPCs	0	3.67964	0.979	0.291	0
M07319	Foxd3	Mouse:Late_RPCs	0	2.67155	0.964	0.276	0
M07398	Pou4f2	Mouse:Late_RPCs	0	3.80873	0.978	0.29	0
M01131	Sox10	Mouse:Late_RPCs	0	2.98335	0.971	0.286	0
M00042	Sox5	Mouse:Late_RPCs	0	2.65075	0.958	0.274	0
M09976	Lhx2	Mouse:Late_RPCs	0	4.1464	0.984	0.308	0
M01014	Sox10,Sox11,Sox12,Sox13,Sox14,Sox15,Sox18,Sox2,Sox21,Sox3,Sox4,Sox5,Sox6,Sox8,Sox9,Sry	Mouse:Late_RPCs	0	2.5745	0.959	0.284	0
M00160	Sry	Mouse:Late_RPCs	0	2.53937	0.955	0.281	0
M04328	Gsx2	Mouse:Late_RPCs	0	4.03634	0.981	0.308	0
M09975	Lef1	Mouse:Late_RPCs	0	2.38085	0.954	0.287	0
M10281	Lef1	Mouse:Late_RPCs	0	2.38085	0.954	0.287	0
M01022	Lef1	Mouse:Late_RPCs	0	2.6698	0.952	0.286	0
M02801	Sox18	Mouse:Late_RPCs	0	2.43323	0.949	0.285	0
M04327	Gsx1	Mouse:Late_RPCs	0	4.0847	0.978	0.314	0
M02866	Hbp1	Mouse:Late_RPCs	0	2.58434	0.956	0.294	0
M02900	Sox12	Mouse:Late_RPCs	0	2.46673	0.957	0.296	0
M04091	Pou6f2	Mouse:Late_RPCs	0	4.06246	0.975	0.314	0
M10282	Lhx2	Mouse:Late_RPCs	0	4.01879	0.976	0.315	0
M10372	Sox2	Mouse:Late_RPCs	0	2.35141	0.948	0.289	0
M01470	Nkx6-3	Mouse:Late_RPCs	0	3.31966	0.971	0.314	0
M01479	Pou6f1	Mouse:Late_RPCs	0	3.59068	0.972	0.316	0
M04348	Hoxb3	Mouse:Late_RPCs	0	3.71908	0.973	0.319	0
M01331	Isx	Mouse:Late_RPCs	0	3.285	0.959	0.306	0
M08785	Sox6	Mouse:Late_RPCs	0	2.41797	0.942	0.29	0
M01365	En1	Mouse:Late_RPCs	0	3.4744	0.964	0.313	0
M01393	Msx2	Mouse:Late_RPCs	0	3.29083	0.96	0.31	0
M08024	Pou6f2	Mouse:Late_RPCs	0	3.46488	0.969	0.32	0
M01349	Mnx1	Mouse:Late_RPCs	0	3.26069	0.957	0.309	0
M04292	Bsx	Mouse:Late_RPCs	0	3.14229	0.953	0.307	0
M04405	Msx1	Mouse:Late_RPCs	0	3.14229	0.953	0.307	0
M04407	Msx2	Mouse:Late_RPCs	0	3.14229	0.953	0.307	0
M01334	Nkx1-1	Mouse:Late_RPCs	0	2.97481	0.952	0.307	0
M01446	Barhl2	Mouse:Late_RPCs	0	2.68413	0.948	0.303	0
M01444	Phox2a	Mouse:Late_RPCs	0	3.53015	0.961	0.318	0
M07605	Lef1	Mouse:Late_RPCs	0	2.33914	0.94	0.297	0
M07047	Lhx2	Mouse:Late_RPCs	0	3.47434	0.975	0.333	0
M01594	Foxa1,Foxa2,Tcf3	Mouse:Late_RPCs	0	2.16027	0.937	0.296	0
M04316	En1	Mouse:Late_RPCs	0	3.14978	0.952	0.311	0
M01371	Gbx1	Mouse:Late_RPCs	0	2.99797	0.95	0.31	0
M01367	Lhx9	Mouse:Late_RPCs	0	3.18097	0.957	0.318	0
M01462	Pou6f1	Mouse:Late_RPCs	0	3.04646	0.957	0.318	0
M01489	Nkx6-1	Mouse:Late_RPCs	0	3.02962	0.958	0.319	0
M01441	Nobox	Mouse:Late_RPCs	0	3.43598	0.959	0.322	0
M01327	Vax2	Mouse:Late_RPCs	0	3.56988	0.962	0.326	0
M04324	Gbx2	Mouse:Late_RPCs	0	3.16918	0.957	0.321	0
M07425	Msx2	Mouse:Late_RPCs	0	3.72501	0.971	0.335	0
M02288	Plac8	Mouse:Late_RPCs	0	3.72501	0.971	0.335	0
M00978	Lef1,Tcf7	Mouse:Late_RPCs	0	2.32793	0.932	0.297	0
M01396	Hoxb7	Mouse:Late_RPCs	0	2.95283	0.952	0.317	0
M02271	Hoxa5	Mouse:Late_RPCs	0	2.55592	0.939	0.304	0
M04322	Gbx1	Mouse:Late_RPCs	0	3.42067	0.96	0.325	0
M01233	Pdx1	Mouse:Late_RPCs	0	3.29241	0.953	0.319	0
M04335	Hmx3	Mouse:Late_RPCs	0	2.64161	0.939	0.305	0
M10337	Pdx1	Mouse:Late_RPCs	0	2.69325	0.946	0.312	0
M04318	En2	Mouse:Late_RPCs	0	3.14337	0.954	0.321	0
M04424	Pdx1	Mouse:Late_RPCs	0	2.89224	0.949	0.316	0
M04384	Lbx2	Mouse:Late_RPCs	0	3.49102	0.957	0.325	0
M01382	Gbx2	Mouse:Late_RPCs	0	3.26566	0.957	0.326	0
M07603	Dlx3	Mouse:Late_RPCs	0	2.99919	0.955	0.324	0
M04441	Shox2	Mouse:Late_RPCs	0	3.62586	0.96	0.33	0
M10283	Lhx3	Mouse:Late_RPCs	0	3.321	0.96	0.33	0
M01360	Dbx2	Mouse:Late_RPCs	0	2.67078	0.948	0.319	0
M01455	En2	Mouse:Late_RPCs	0	3.12241	0.953	0.324	0
M01354	Pou2f1	Mouse:Late_RPCs	0	2.98659	0.953	0.326	0
M01461	Emx2	Mouse:Late_RPCs	0	3.36701	0.953	0.326	0
M04349	Hoxb5	Mouse:Late_RPCs	0	3.37964	0.958	0.331	0
M04403	Mnx1	Mouse:Late_RPCs	0	3.12516	0.957	0.33	0
M08912	En1	Mouse:Late_RPCs	0	3.18532	0.953	0.326	0
M01477	Pou3f2	Mouse:Late_RPCs	0	3.21725	0.954	0.329	0
M01596	Gli3	Mouse:Late_RPCs	0	2.5288	0.935	0.313	0
M08784	Sox17	Mouse:Late_RPCs	0	2.16225	0.922	0.3	0
M01408	Pou4f3	Mouse:Late_RPCs	0	2.59189	0.942	0.32	0
M01427	Nkx1-2	Mouse:Late_RPCs	0	3.02396	0.949	0.327	0
M04381	Isx	Mouse:Late_RPCs	0	3.22529	0.951	0.329	0
M04390	Lhx9	Mouse:Late_RPCs	0	3.22529	0.951	0.329	0
M04431	Prrx1	Mouse:Late_RPCs	0	3.22529	0.951	0.329	0
M04433	Prrx2	Mouse:Late_RPCs	0	3.22529	0.951	0.329	0
M04439	Shox2	Mouse:Late_RPCs	0	3.22529	0.951	0.329	0
M01481	Hmx1	Mouse:Late_RPCs	0	2.53793	0.933	0.312	0
M04311	Dlx2	Mouse:Late_RPCs	0	2.68402	0.935	0.314	0
M08719	Hoxb2	Mouse:Late_RPCs	0	2.20207	0.931	0.311	0
M02944	Alx4	Mouse:Late_RPCs	0	3.39113	0.953	0.333	0
M01389	Rax	Mouse:Late_RPCs	0	3.1331	0.948	0.329	0
M01417	Alx4	Mouse:Late_RPCs	0	3.31948	0.955	0.336	0
M00241	Nkx2-5	Mouse:Late_RPCs	0	2.47678	0.933	0.315	0
M03901	Gli2	Mouse:Late_RPCs	0	2.37997	0.916	0.298	0
M01332	Barhl1	Mouse:Late_RPCs	0	2.72567	0.94	0.324	0
M01469	Nkx6-1	Mouse:Late_RPCs	0	2.61988	0.942	0.326	0
M01475	Evx1	Mouse:Late_RPCs	0	3.09369	0.946	0.33	0
M04329	Gbx1	Mouse:Late_RPCs	0	3.30383	0.953	0.337	0
M04443	Uncx	Mouse:Late_RPCs	0	3.27562	0.956	0.34	0
M01370	Hoxa4	Mouse:Late_RPCs	0	2.88823	0.946	0.331	0
M01412	Msx1	Mouse:Late_RPCs	0	3.01169	0.949	0.334	0
M02808	Sox8	Mouse:Late_RPCs	0	2.0296	0.923	0.308	0
M07994	Lbx1	Mouse:Late_RPCs	0	3.15197	0.947	0.332	0
M01336	Hoxa7	Mouse:Late_RPCs	0	2.91168	0.947	0.333	0
M01424	Hoxb4	Mouse:Late_RPCs	0	2.97598	0.948	0.334	0
M04279	Alx3	Mouse:Late_RPCs	0	3.08566	0.947	0.334	0
M04310	Dlx1	Mouse:Late_RPCs	0	2.59268	0.93	0.318	0
M01415	Shox2	Mouse:Late_RPCs	0	3.2444	0.95	0.338	0
M04402	Mixl1	Mouse:Late_RPCs	0	3.2435	0.953	0.341	0
M01401	Lbx2	Mouse:Late_RPCs	0	3.03679	0.946	0.335	0
M01339	Pax7	Mouse:Late_RPCs	0	3.17634	0.948	0.338	0
M01394	Hoxa7	Mouse:Late_RPCs	0	2.76803	0.938	0.328	0
M04417	Noto	Mouse:Late_RPCs	0	3.42021	0.948	0.338	0
M07385	Lhx2	Mouse:Late_RPCs	0	3.20643	0.948	0.338	0
M01325	Lhx2	Mouse:Late_RPCs	0	2.99744	0.942	0.333	0
M01423	Arx	Mouse:Late_RPCs	0	3.02248	0.942	0.333	0
M08902	Foxa1,Foxa2,Lef1,Tcf3,Tcf7	Mouse:Late_RPCs	0	2.06872	0.922	0.313	0
M01356	Phox2b	Mouse:Late_RPCs	0	2.85187	0.943	0.336	0
M01458	Uncx	Mouse:Late_RPCs	0	2.97569	0.946	0.339	0
M04399	Meox2	Mouse:Late_RPCs	0	2.9296	0.948	0.341	0
M04415	Nkx6-1	Mouse:Late_RPCs	0	3.05942	0.945	0.339	0
M04416	Nkx6-2	Mouse:Late_RPCs	0	3.05942	0.945	0.339	0
M04319	Esx1	Mouse:Late_RPCs	0	3.14277	0.946	0.341	0
M04385	Lhx2	Mouse:Late_RPCs	0	3.34294	0.946	0.342	0
M04396	Lhx8	Mouse:Late_RPCs	0	3.16525	0.941	0.337	0
M01340	Barx1	Mouse:Late_RPCs	0	2.4791	0.928	0.325	0
M04344	Hoxa2	Mouse:Late_RPCs	0	3.01166	0.94	0.337	0
M04347	Hoxb2	Mouse:Late_RPCs	0	3.11714	0.946	0.343	0
M04392	Lmx1a	Mouse:Late_RPCs	0	3.08375	0.945	0.342	0
M04393	Lmx1b	Mouse:Late_RPCs	0	3.08375	0.945	0.342	0
M04394	Lhx4	Mouse:Late_RPCs	0	3.08375	0.945	0.342	0
M04445	Uncx	Mouse:Late_RPCs	0	3.08375	0.945	0.342	0
M01391	Pax6	Mouse:Late_RPCs	0	2.70253	0.939	0.337	0
M07035	Ctnnb1	Mouse:Late_RPCs	0	2.01495	0.916	0.316	0
M08772	Hoxa6	Mouse:Late_RPCs	0	2.62139	0.929	0.329	0
M04343	Hoxa1	Mouse:Late_RPCs	0	3.17502	0.944	0.344	0
M00099	Prrx2	Mouse:Late_RPCs	0	2.90992	0.947	0.348	0
M01418	Lhx1	Mouse:Late_RPCs	0	2.66124	0.938	0.339	0
M04333	Hmx1	Mouse:Late_RPCs	0	2.31269	0.916	0.318	0
M04451	Vsx2	Mouse:Late_RPCs	0	2.66758	0.927	0.33	0
M08003	Pou6f1	Mouse:Late_RPCs	0	2.70943	0.931	0.334	0
M08015	Vsx1	Mouse:Late_RPCs	0	2.66758	0.927	0.33	0
M10254	Gli1	Mouse:Late_RPCs	0	2.29678	0.918	0.322	0
M01335	Vsx1	Mouse:Late_RPCs	0	2.89179	0.938	0.343	0
M08656	Sox6,Tead4	Mouse:Late_RPCs	0	2.04928	0.918	0.323	0
M04373	Hoxd3	Mouse:Late_RPCs	0	2.98176	0.938	0.344	0
M08949	Lhx6	Mouse:Late_RPCs	0	2.87411	0.939	0.345	0
M01431	Barx2	Mouse:Late_RPCs	0	2.62225	0.928	0.335	0
M04300	Dlx2	Mouse:Late_RPCs	0	2.39579	0.918	0.325	0
M04302	Dlx4	Mouse:Late_RPCs	0	2.39579	0.918	0.325	0
M08043	Dlx4	Mouse:Late_RPCs	0	2.39579	0.918	0.325	0
M01486	Dlx4	Mouse:Late_RPCs	0	2.44479	0.923	0.331	0
M01330	Hoxb3	Mouse:Late_RPCs	0	2.70276	0.934	0.343	0
M01235	Pdx1	Mouse:Late_RPCs	0	2.71932	0.928	0.338	0
M01320	Prop1	Mouse:Late_RPCs	0	2.81396	0.935	0.346	0
M04368	Hoxa2	Mouse:Late_RPCs	0	2.91148	0.933	0.345	0
M00640	Hoxa4	Mouse:Late_RPCs	0	2.29606	0.914	0.327	0
M01013	Pdx1	Mouse:Late_RPCs	0	2.15413	0.915	0.328	0
M04614	Pdx1	Mouse:Late_RPCs	0	2.6543	0.93	0.343	0
M01704	Gli3	Mouse:Late_RPCs	0	2.18028	0.9	0.316	0
M01474	Esx1	Mouse:Late_RPCs	0	2.83902	0.929	0.346	0
M01413	Hmx3	Mouse:Late_RPCs	0	2.0768	0.902	0.32	0
M04435	Rax	Mouse:Late_RPCs	0	2.73412	0.93	0.348	0
M01654	Arid3a	Mouse:Late_RPCs	0	2.52832	0.946	0.365	0
M01703	Gli2	Mouse:Late_RPCs	0	2.14678	0.897	0.316	0
M03546	Dlx5	Mouse:Late_RPCs	0	2.52832	0.946	0.365	0
M08766	Gli3	Mouse:Late_RPCs	0	2.11155	0.892	0.312	0
M00510	Lhx3	Mouse:Late_RPCs	0	2.55606	0.932	0.353	0
M04398	Meox1	Mouse:Late_RPCs	0	2.81244	0.929	0.35	0
M01234	Pdx1	Mouse:Late_RPCs	0	2.16898	0.914	0.335	0
M01702	Gli1	Mouse:Late_RPCs	0	2.12223	0.894	0.316	0
M04143	Tead3	Mouse:Late_RPCs	0	2.07091	0.88	0.302	0
M08822	Msx1	Mouse:Late_RPCs	0	2.34477	0.919	0.344	0
M10096	Tcf4,Tcf7l2	Mouse:Late_RPCs	0	2.01367	0.892	0.318	0
M10401	Tcf4,Tcf7l2	Mouse:Late_RPCs	0	2.01367	0.892	0.318	0
M01388	Dlx5	Mouse:Late_RPCs	0	2.35404	0.914	0.341	0
M04388	Lhx6	Mouse:Late_RPCs	0	2.28024	0.909	0.336	0
M01323	Otp	Mouse:Late_RPCs	0	2.51364	0.921	0.349	0
M01337	Hoxa3	Mouse:Late_RPCs	0	2.75603	0.923	0.353	0
M01409	Lmx1a	Mouse:Late_RPCs	0	2.27192	0.914	0.344	0
M01439	Dlx1	Mouse:Late_RPCs	0	2.53054	0.924	0.354	0
M04400	Meox2	Mouse:Late_RPCs	0	2.3704	0.911	0.341	0
M04301	Dlx3	Mouse:Late_RPCs	0	2.21736	0.9	0.331	0
M08042	Dlx3	Mouse:Late_RPCs	0	2.21736	0.9	0.331	0
M07454	Gli1	Mouse:Late_RPCs	0	2.01457	0.897	0.329	0
M07988	Emx1	Mouse:Late_RPCs	0	2.79434	0.917	0.35	0
M04446	Vax1	Mouse:Late_RPCs	0	2.34449	0.908	0.342	0
M04447	Vax2	Mouse:Late_RPCs	0	2.34449	0.908	0.342	0
M01460	Hoxb6	Mouse:Late_RPCs	0	2.03161	0.897	0.332	0
M04299	Dlx1	Mouse:Late_RPCs	0	2.38192	0.906	0.341	0
M08041	Dlx1	Mouse:Late_RPCs	0	2.38192	0.906	0.341	0
M01348	Prrx1	Mouse:Late_RPCs	0	2.54353	0.918	0.355	0
M01376	Prrx2	Mouse:Late_RPCs	0	2.62774	0.916	0.353	0
M04331	Hesx1	Mouse:Late_RPCs	0	2.04836	0.899	0.336	0
M02735	Arid3a	Mouse:Late_RPCs	0	2.048	0.902	0.34	0
M01471	Lhx3	Mouse:Late_RPCs	0	2.30192	0.915	0.354	0
M04334	Hmx2	Mouse:Late_RPCs	0	2.01433	0.89	0.33	0
M04395	Lhx8	Mouse:Late_RPCs	0	2.29731	0.903	0.343	0
M04387	Lhx6	Mouse:Late_RPCs	0	2.6961	0.913	0.354	0
M01355	Alx3	Mouse:Late_RPCs	0	2.58689	0.916	0.358	0
M04312	Emx1	Mouse:Late_RPCs	0	2.66565	0.909	0.351	0
M04314	Emx2	Mouse:Late_RPCs	0	2.66387	0.911	0.353	0
M01400	Dlx3	Mouse:Late_RPCs	0	2.13771	0.898	0.341	0
M04425	Pdx1	Mouse:Late_RPCs	0	2.38021	0.897	0.34	0
M01363	Lmx1b	Mouse:Late_RPCs	0	2.18817	0.91	0.354	0
M01353	Lhx5	Mouse:Late_RPCs	0	2.28101	0.91	0.355	0
M01971	Lhx3	Mouse:Late_RPCs	0	2.25614	0.911	0.356	0
M09961	Isl1	Mouse:Late_RPCs	0	2.0814	0.909	0.356	0
M10272	Isl1	Mouse:Late_RPCs	0	2.0814	0.909	0.356	0
M01448	Hoxd1	Mouse:Late_RPCs	0	2.53448	0.912	0.36	0
M01385	Pax4	Mouse:Late_RPCs	0	2.61484	0.913	0.362	0
M04391	Lhx9	Mouse:Late_RPCs	0	2.00768	0.892	0.342	0
M08770	Hoxa3	Mouse:Late_RPCs	0	2.55821	0.911	0.362	0
M04330	Hesx1	Mouse:Late_RPCs	0	2.43103	0.907	0.361	0
M01338	Hoxd3	Mouse:Late_RPCs	0	2.38486	0.913	0.369	0
M01438	Pdx1	Mouse:Late_RPCs	0	2.45385	0.908	0.364	0
M01442	Bsx	Mouse:Late_RPCs	0	2.05721	0.895	0.351	0
M04386	Lhx2	Mouse:Late_RPCs	0	2.27453	0.903	0.364	0
M01314	Lhx6	Mouse:Late_RPCs	0	2.35326	0.897	0.362	0
M01386	Evx2	Mouse:Late_RPCs	0	2.30552	0.898	0.364	0
M04056	Nfia	Mouse:Late_RPCs	0	2.43176	0.899	0.377	0
M04365	Hoxd8	Mouse:Late_RPCs	0	2.23701	0.892	0.37	0
M01326	Gsx2	Mouse:Late_RPCs	0	2.39199	0.895	0.375	0
M04057	Nfib	Mouse:Late_RPCs	0	2.46378	0.896	0.376	0
M07090	Fos	Mouse:Late_RPCs	0	2.86294	0.739	0.222	0
M01452	Hoxa5	Mouse:Late_RPCs	0	2.26217	0.892	0.376	0
M04058	Nfix	Mouse:Late_RPCs	0	2.45233	0.894	0.379	0
M01319	Hoxb5	Mouse:Late_RPCs	0	2.16468	0.886	0.38	0
M07104	Jund	Mouse:Late_RPCs	0	2.89426	0.723	0.219	0
M08931	Fosl2,Jund	Mouse:Late_RPCs	0	2.83781	0.723	0.219	0
M07411	Nfia	Mouse:Late_RPCs	0	2.23338	0.885	0.382	0
M08981	Vsx1	Mouse:Late_RPCs	0	2.24397	0.878	0.38	0
M00437	Vsx2	Mouse:Late_RPCs	0	2.15932	0.877	0.381	0
M01397	Vax1	Mouse:Late_RPCs	0	2.1447	0.883	0.387	0
M08938	Fosl1,Jun	Mouse:Late_RPCs	0	2.81375	0.716	0.22	0
M08923	Fosl2,Junb	Mouse:Late_RPCs	0	2.74167	0.721	0.227	0
M08933	Fos,Jund	Mouse:Late_RPCs	0	2.77614	0.714	0.221	0
M07103	Junb	Mouse:Late_RPCs	0	2.81728	0.714	0.222	0
M08940	Fosl2,Jun	Mouse:Late_RPCs	0	2.78994	0.71	0.22	0
M09923	Fosl2	Mouse:Late_RPCs	0	2.78778	0.713	0.224	0
M04213	Jdp2	Mouse:Late_RPCs	0	2.48489	0.734	0.246	0
M07102	Jun	Mouse:Late_RPCs	0	2.63558	0.719	0.232	0
M08942	Fos,Jun	Mouse:Late_RPCs	0	2.73019	0.713	0.226	0
M08922	Fosl1,Junb	Mouse:Late_RPCs	0	2.6931	0.713	0.228	0
M08934	Jund	Mouse:Late_RPCs	0	2.57371	0.714	0.23	0
M07092	Fosl2	Mouse:Late_RPCs	0	2.76277	0.708	0.225	0
M08756	Bach1	Mouse:Late_RPCs	0	2.57009	0.715	0.232	0
M08929	Fosl1,Jund	Mouse:Late_RPCs	0	2.56604	0.718	0.236	0
M08925	Fos,Junb	Mouse:Late_RPCs	0	2.7375	0.705	0.226	0
M09617	Fos	Mouse:Late_RPCs	0	2.7245	0.704	0.226	0
M09965	Jun	Mouse:Late_RPCs	0	2.69081	0.705	0.229	0
M09615	Fosl1	Mouse:Late_RPCs	0	2.6884	0.706	0.231	0
M10273	Junb	Mouse:Late_RPCs	0	2.62973	0.704	0.23	0
M04693	Fos	Mouse:Late_RPCs	0	2.46476	0.718	0.245	0
M09614	Fosb	Mouse:Late_RPCs	0	2.62841	0.701	0.23	0
M08936	Fosb,Jun	Mouse:Late_RPCs	0	2.60292	0.7	0.23	0
M10274	Jund	Mouse:Late_RPCs	0	2.61438	0.7	0.231	0
M09964	Jund	Mouse:Late_RPCs	0	2.60118	0.699	0.231	0
M09686	Fosl1	Mouse:Late_RPCs	0	2.58393	0.699	0.232	0
M09922	Fosl1	Mouse:Late_RPCs	0	2.60652	0.698	0.231	0
M10236	Fosl1	Mouse:Late_RPCs	0	2.60652	0.698	0.231	0
M08920	Fosb,Junb	Mouse:Late_RPCs	0	2.59915	0.699	0.233	0
M09616	Fosl2	Mouse:Late_RPCs	0	2.5936	0.694	0.229	0
M10237	Fosl2	Mouse:Late_RPCs	0	2.59734	0.695	0.23	0
M07091	Fosl1	Mouse:Late_RPCs	0	2.62829	0.698	0.234	0
M01487	Hoxa1	Mouse:Late_RPCs	0	2.00488	0.857	0.396	0
M09921	Fosb	Mouse:Late_RPCs	0	2.57395	0.693	0.232	0
M10235	Fosb	Mouse:Late_RPCs	0	2.59425	0.694	0.233	0
M09963	Junb	Mouse:Late_RPCs	0	2.46191	0.693	0.239	0
M02876	Jdp2	Mouse:Late_RPCs	0	2.38113	0.702	0.25	0
M08914	Fosl2	Mouse:Late_RPCs	0	2.49869	0.689	0.237	0
M03870	Fosl2	Mouse:Late_RPCs	0	2.23699	0.708	0.259	0
M10180	Atf3	Mouse:Late_RPCs	0	2.3791	0.691	0.243	0
M09631	Junb	Mouse:Late_RPCs	0	2.46654	0.684	0.24	0
M10238	Fos	Mouse:Late_RPCs	0	2.48932	0.677	0.235	0
M03551	Junb	Mouse:Late_RPCs	0	2.24931	0.694	0.254	0
M00495	Bach1	Mouse:Late_RPCs	0	2.39172	0.685	0.246	0
M03866	Fos,Jun	Mouse:Late_RPCs	0	2.3496	0.679	0.243	0
M09924	Fos	Mouse:Late_RPCs	0	2.3496	0.679	0.243	0
M00926	Fos,Fosb,Fosl1,Fosl2,Jun,Junb,Jund	Mouse:Late_RPCs	0	2.35034	0.678	0.243	0
M01267	Fosl1	Mouse:Late_RPCs	0	2.35034	0.678	0.243	0
M02095	Fosl1	Mouse:Late_RPCs	0	2.35034	0.678	0.243	0
M10275	Jun	Mouse:Late_RPCs	0	2.4106	0.672	0.241	0
M08944	Jun,Junb	Mouse:Late_RPCs	0	2.12008	0.685	0.258	0
M07600	Fos	Mouse:Late_RPCs	0	2.20131	0.681	0.255	0
M08926	Junb	Mouse:Late_RPCs	0	2.21981	0.673	0.251	0
M03869	Fosl1	Mouse:Late_RPCs	0	2.19834	0.67	0.252	0
M02280	Fos,Jun	Mouse:Late_RPCs	0	2.19548	0.669	0.252	0
M08946	Fos	Mouse:Late_RPCs	0	2.17325	0.669	0.255	0
M00517	Fos,Fosb,Fosl1,Jun,Junb,Jund	Mouse:Late_RPCs	0	2.01972	0.666	0.268	0
M04004	Sox9	Mouse:Late_NG	0	3.71623	0.994	0.373	0
M07128	Sox6	Mouse:Late_NG	0	4.10346	0.998	0.379	0
M09787	Sox13	Mouse:Late_NG	0	3.53	0.993	0.374	0
M08972	Sox17	Mouse:Late_NG	0	3.63485	0.994	0.377	0
M01016	Sox17	Mouse:Late_NG	0	3.15775	0.99	0.376	0
M08971	Sox15	Mouse:Late_NG	0	3.08844	0.989	0.376	0
M01308	Sox4	Mouse:Late_NG	0	3.54815	0.995	0.386	0
M10067	Sox2	Mouse:Late_NG	0	3.39684	0.995	0.386	0
M00410	Sox9	Mouse:Late_NG	0	3.34612	0.989	0.381	0
M02795	Sox11	Mouse:Late_NG	0	3.01735	0.99	0.382	0
M07127	Sox3	Mouse:Late_NG	0	3.39441	0.994	0.386	0
M08899	Hbp1,Sox1,Sox10,Sox11,Sox13,Sox15,Sox17,Sox18,Sox2,Sox21,Sox3,Sox30,Sox4,Sox5,Sox6,Sox7,Sox8,Sox9,Sry	Mouse:Late_NG	0	3.66269	0.992	0.384	0
M08975	Sox6	Mouse:Late_NG	0	3.19763	0.987	0.379	0
M08973	Sox2	Mouse:Late_NG	0	3.63667	0.994	0.387	0
M08976	Sry	Mouse:Late_NG	0	3.03594	0.988	0.382	0
M09709	Sox3	Mouse:Late_NG	0	3.99701	0.998	0.394	0
M10068	Sox3	Mouse:Late_NG	0	4.15408	0.999	0.395	0
M10069	Sox4	Mouse:Late_NG	0	3.18522	0.992	0.39	0
M10373	Sox4	Mouse:Late_NG	0	3.18522	0.992	0.39	0
M07225	Sox2	Mouse:Late_NG	0	3.79034	0.995	0.395	0
M08974	Sox5	Mouse:Late_NG	0	2.88364	0.982	0.386	0
M08970	Sox10	Mouse:Late_NG	0	2.93805	0.986	0.391	0
M02804	Sox30	Mouse:Late_NG	0	2.65053	0.981	0.388	0
M02917	Sry	Mouse:Late_NG	0	2.76489	0.981	0.392	0
M03847	Sox15	Mouse:Late_NG	0	2.95193	0.983	0.397	0
M07307	Sox18	Mouse:Late_NG	0	2.63194	0.973	0.392	0
M02116	Sox10	Mouse:Late_NG	0	2.66434	0.979	0.399	0
M07432	Sox2	Mouse:Late_NG	0	2.42365	0.969	0.389	0
M01590	Smad1	Mouse:Late_NG	0	2.32257	0.973	0.395	0
M07308	Sox2	Mouse:Late_NG	0	2.30813	0.968	0.39	0
M09819	Sox10	Mouse:Late_NG	0	2.71774	0.98	0.402	0
M10066	Sox17	Mouse:Late_NG	0	2.5685	0.968	0.39	0
M02902	Sox14,Sox4	Mouse:Late_NG	0	2.78856	0.98	0.403	0
M01284	Sox9	Mouse:Late_NG	0	2.97043	0.984	0.408	0
M03138	Sox10	Mouse:Late_NG	0	2.52086	0.985	0.409	0
M03886	Sox2	Mouse:Late_NG	0	2.29275	0.966	0.392	0
M03803	Sox17	Mouse:Late_NG	0	2.379	0.971	0.398	0
M07269	Sox9	Mouse:Late_NG	0	2.52535	0.982	0.409	0
M04837	Nanog	Mouse:Late_NG	0	2.25987	0.972	0.402	0
M07309	Sox7	Mouse:Late_NG	0	2.55951	0.97	0.401	0
M02096	Pdx1	Mouse:Late_NG	0	3.00481	0.981	0.423	0
M04294	Barhl1	Mouse:Late_NG	0	3.27379	0.991	0.433	0
M02907	Sox21	Mouse:Late_NG	0	2.31083	0.957	0.401	0
M04288	Barhl2	Mouse:Late_NG	0	3.08535	0.984	0.431	0
M01272	Sox2	Mouse:Late_NG	0	2.08316	0.95	0.398	0
M01162	Nobox	Mouse:Late_NG	0	4.15044	0.998	0.449	0
M07398	Pou4f2	Mouse:Late_NG	0	3.04547	0.983	0.435	0
M04291	Barx1	Mouse:Late_NG	0	2.96012	0.983	0.436	0
M01331	Isx	Mouse:Late_NG	0	3.18153	0.988	0.442	0
M03888	Sox6	Mouse:Late_NG	0	2.02262	0.958	0.413	0
M04328	Gsx2	Mouse:Late_NG	0	3.73659	0.994	0.449	0
M07614	Sox4	Mouse:Late_NG	0	2.07859	0.951	0.406	0
M01371	Gbx1	Mouse:Late_NG	0	2.82114	0.986	0.444	0
M02799	Sox15	Mouse:Late_NG	0	2.12461	0.951	0.409	0
M04292	Bsx	Mouse:Late_NG	0	3.17724	0.983	0.441	0
M04327	Gsx1	Mouse:Late_NG	0	4.04338	0.995	0.453	0
M04405	Msx1	Mouse:Late_NG	0	3.17724	0.983	0.441	0
M04407	Msx2	Mouse:Late_NG	0	3.17724	0.983	0.441	0
M04091	Pou6f2	Mouse:Late_NG	0	3.8049	0.993	0.452	0
M10282	Lhx2	Mouse:Late_NG	0	3.87908	0.995	0.454	0
M09976	Lhx2	Mouse:Late_NG	0	3.8128	0.99	0.45	0
M04384	Lbx2	Mouse:Late_NG	0	3.93466	0.995	0.457	0
M01479	Pou6f1	Mouse:Late_NG	0	3.22552	0.99	0.453	0
M04316	En1	Mouse:Late_NG	0	3.13806	0.982	0.445	0
M04318	En2	Mouse:Late_NG	0	3.26248	0.99	0.453	0
M04381	Isx	Mouse:Late_NG	0	3.60263	0.995	0.458	0
M04390	Lhx9	Mouse:Late_NG	0	3.60263	0.995	0.458	0
M04431	Prrx1	Mouse:Late_NG	0	3.60263	0.995	0.458	0
M04433	Prrx2	Mouse:Late_NG	0	3.60263	0.995	0.458	0
M04439	Shox2	Mouse:Late_NG	0	3.60263	0.995	0.458	0
M01444	Phox2a	Mouse:Late_NG	0	3.40013	0.988	0.453	0
M01334	Nkx1-1	Mouse:Late_NG	0	2.61946	0.976	0.442	0
M04322	Gbx1	Mouse:Late_NG	0	3.44382	0.991	0.457	0
M04441	Shox2	Mouse:Late_NG	0	4.08095	0.995	0.461	0
M01441	Nobox	Mouse:Late_NG	0	3.5722	0.988	0.455	0
M04348	Hoxb3	Mouse:Late_NG	0	3.41748	0.989	0.456	0
M09767	Ascl1	Mouse:Late_NG	0	3.04667	0.947	0.414	0
M02944	Alx4	Mouse:Late_NG	0	3.46803	0.994	0.462	0
M04324	Gbx2	Mouse:Late_NG	0	3.41011	0.986	0.454	0
M01389	Rax	Mouse:Late_NG	0	3.29058	0.988	0.457	0
M01461	Emx2	Mouse:Late_NG	0	3.37891	0.988	0.457	0
M02191	Sox17	Mouse:Late_NG	0	2.15153	0.953	0.422	0
M01233	Pdx1	Mouse:Late_NG	0	3.14536	0.981	0.451	0
M01327	Vax2	Mouse:Late_NG	0	3.52225	0.988	0.458	0
M01349	Mnx1	Mouse:Late_NG	0	2.98223	0.973	0.444	0
M01365	En1	Mouse:Late_NG	0	3.15591	0.978	0.449	0
M01393	Msx2	Mouse:Late_NG	0	2.95016	0.975	0.446	0
M01455	En2	Mouse:Late_NG	0	3.08802	0.984	0.455	0
M04329	Gbx1	Mouse:Late_NG	0	3.77241	0.994	0.465	0
M01423	Arx	Mouse:Late_NG	0	3.13625	0.987	0.459	0
M02737	Ascl2	Mouse:Late_NG	0	2.94111	0.944	0.416	0
M04279	Alx3	Mouse:Late_NG	0	3.38928	0.99	0.462	0
M04159	Ascl2	Mouse:Late_NG	0	3.09785	0.94	0.413	0
M04396	Lhx8	Mouse:Late_NG	0	3.53347	0.989	0.462	0
M08024	Pou6f2	Mouse:Late_NG	0	3.06868	0.983	0.456	0
M10283	Lhx3	Mouse:Late_NG	0	3.22726	0.989	0.462	0
M01382	Gbx2	Mouse:Late_NG	0	3.31269	0.984	0.458	0
M04344	Hoxa2	Mouse:Late_NG	0	3.203	0.988	0.462	0
M04402	Mixl1	Mouse:Late_NG	0	3.55195	0.994	0.468	0
M07047	Lhx2	Mouse:Late_NG	0	3.31936	0.993	0.467	0
M07425	Msx2	Mouse:Late_NG	0	3.69973	0.994	0.468	0
M02288	Plac8	Mouse:Late_NG	0	3.69973	0.994	0.468	0
M01417	Alx4	Mouse:Late_NG	0	3.3858	0.99	0.465	0
M01470	Nkx6-3	Mouse:Late_NG	0	2.71632	0.977	0.452	0
M04319	Esx1	Mouse:Late_NG	0	3.60665	0.992	0.467	0
M04385	Lhx2	Mouse:Late_NG	0	3.74615	0.992	0.467	0
M04417	Noto	Mouse:Late_NG	0	3.80002	0.99	0.465	0
M01339	Pax7	Mouse:Late_NG	0	3.17587	0.988	0.464	0
M01354	Pou2f1	Mouse:Late_NG	0	2.86179	0.981	0.457	0
M10178	Ascl2	Mouse:Late_NG	0	3.14903	0.94	0.416	0
M01367	Lhx9	Mouse:Late_NG	0	2.88928	0.975	0.452	0
M01415	Shox2	Mouse:Late_NG	0	3.46657	0.988	0.465	0
M01462	Pou6f1	Mouse:Late_NG	0	2.63416	0.975	0.452	0
M07603	Dlx3	Mouse:Late_NG	0	2.77608	0.979	0.456	0
M01131	Sox10	Mouse:Late_NG	0	2.05332	0.953	0.431	0
M01401	Lbx2	Mouse:Late_NG	0	3.13834	0.984	0.462	0
M04310	Dlx1	Mouse:Late_NG	0	2.4335	0.968	0.446	0
M04443	Uncx	Mouse:Late_NG	0	3.40887	0.99	0.468	0
M00927	Tfap4	Mouse:Late_NG	0	2.98925	0.937	0.416	0
M01325	Lhx2	Mouse:Late_NG	0	3.06391	0.981	0.46	0
M04392	Lmx1a	Mouse:Late_NG	0	3.35258	0.988	0.467	0
M04393	Lmx1b	Mouse:Late_NG	0	3.35258	0.988	0.467	0
M04394	Lhx4	Mouse:Late_NG	0	3.35258	0.988	0.467	0
M04445	Uncx	Mouse:Late_NG	0	3.35258	0.988	0.467	0
M07994	Lbx1	Mouse:Late_NG	0	3.17192	0.981	0.46	0
M04300	Dlx2	Mouse:Late_NG	0	2.42771	0.968	0.448	0
M04302	Dlx4	Mouse:Late_NG	0	2.42771	0.968	0.448	0
M04312	Emx1	Mouse:Late_NG	0	3.31889	0.985	0.465	0
M04347	Hoxb2	Mouse:Late_NG	0	3.23789	0.988	0.468	0
M04424	Pdx1	Mouse:Late_NG	0	2.58759	0.968	0.448	0
M07113	Myog	Mouse:Late_NG	0	2.91633	0.932	0.412	0
M07134	Tcf12	Mouse:Late_NG	0	2.88657	0.932	0.412	0
M08043	Dlx4	Mouse:Late_NG	0	2.42771	0.968	0.448	0
M08912	En1	Mouse:Late_NG	0	3.0319	0.977	0.457	0
M01427	Nkx1-2	Mouse:Late_NG	0	2.81603	0.976	0.457	0
M01477	Pou3f2	Mouse:Late_NG	0	3.1064	0.979	0.46	0
M04349	Hoxb5	Mouse:Late_NG	0	3.25623	0.981	0.462	0
M01332	Barhl1	Mouse:Late_NG	0	2.6623	0.971	0.453	0
M01396	Hoxb7	Mouse:Late_NG	0	2.58492	0.968	0.45	0
M01458	Uncx	Mouse:Late_NG	0	2.98865	0.983	0.465	0
M10351	Ptf1a	Mouse:Late_NG	0	2.73323	0.925	0.407	0
M01474	Esx1	Mouse:Late_NG	0	3.23909	0.984	0.467	0
M04343	Hoxa1	Mouse:Late_NG	0	3.47904	0.985	0.468	0
M04403	Mnx1	Mouse:Late_NG	0	2.96349	0.978	0.461	0
M04415	Nkx6-1	Mouse:Late_NG	0	3.15669	0.982	0.465	0
M04416	Nkx6-2	Mouse:Late_NG	0	3.15669	0.982	0.465	0
M04368	Hoxa2	Mouse:Late_NG	0	3.05388	0.983	0.467	0
M04373	Hoxd3	Mouse:Late_NG	0	3.09098	0.983	0.467	0
M04435	Rax	Mouse:Late_NG	0	3.12613	0.984	0.468	0
M09691	Tcf12	Mouse:Late_NG	0	2.82703	0.929	0.414	0
M01424	Hoxb4	Mouse:Late_NG	0	2.93671	0.977	0.462	0
M01446	Barhl2	Mouse:Late_NG	0	2.2314	0.953	0.438	0
M01475	Evx1	Mouse:Late_NG	0	2.9853	0.974	0.459	0
M04614	Pdx1	Mouse:Late_NG	0	2.83324	0.979	0.464	0
M01394	Hoxa7	Mouse:Late_NG	0	2.57959	0.969	0.455	0
M04335	Hmx3	Mouse:Late_NG	0	2.21027	0.952	0.438	0
M04425	Pdx1	Mouse:Late_NG	0	2.62094	0.968	0.454	0
M04451	Vsx2	Mouse:Late_NG	0	2.60969	0.968	0.454	0
M07385	Lhx2	Mouse:Late_NG	0	3.22463	0.979	0.465	0
M08015	Vsx1	Mouse:Late_NG	0	2.60969	0.968	0.454	0
M09875	Bhlha15	Mouse:Late_NG	0	2.98307	0.926	0.412	0
M10188	Bhlha15	Mouse:Late_NG	0	2.98307	0.926	0.412	0
M04398	Meox1	Mouse:Late_NG	0	2.98718	0.983	0.47	0
M01335	Vsx1	Mouse:Late_NG	0	3.1734	0.98	0.467	0
M04301	Dlx3	Mouse:Late_NG	0	2.42514	0.961	0.448	0
M08042	Dlx3	Mouse:Late_NG	0	2.42514	0.961	0.448	0
M00099	Prrx2	Mouse:Late_NG	0	3.11341	0.984	0.472	0
M01235	Pdx1	Mouse:Late_NG	0	2.78434	0.973	0.461	0
M01370	Hoxa4	Mouse:Late_NG	0	2.73888	0.971	0.459	0
M01376	Prrx2	Mouse:Late_NG	0	3.01137	0.981	0.469	0
M01489	Nkx6-1	Mouse:Late_NG	0	2.55557	0.965	0.453	0
M04387	Lhx6	Mouse:Late_NG	0	3.12539	0.981	0.469	0
M07112	Myod1	Mouse:Late_NG	0	2.89574	0.929	0.418	0
M08772	Hoxa6	Mouse:Late_NG	0	2.36167	0.965	0.454	0
M10337	Pdx1	Mouse:Late_NG	0	2.22665	0.956	0.445	0
M01320	Prop1	Mouse:Late_NG	0	3.01961	0.979	0.469	0
M07988	Emx1	Mouse:Late_NG	0	3.17164	0.977	0.467	0
M01408	Pou4f3	Mouse:Late_NG	0	2.1674	0.96	0.451	0
M04314	Emx2	Mouse:Late_NG	0	3.11754	0.977	0.468	0
M08949	Lhx6	Mouse:Late_NG	0	2.95148	0.977	0.468	0
M01386	Evx2	Mouse:Late_NG	0	2.89329	0.981	0.473	0
M01448	Hoxd1	Mouse:Late_NG	0	2.98646	0.981	0.473	0
M04311	Dlx2	Mouse:Late_NG	0	2.16688	0.952	0.444	0
M04330	Hesx1	Mouse:Late_NG	0	3.1156	0.98	0.473	0
M01412	Msx1	Mouse:Late_NG	0	2.77629	0.97	0.463	0
M01337	Hoxa3	Mouse:Late_NG	0	3.00081	0.977	0.471	0
M01340	Barx1	Mouse:Late_NG	0	2.23861	0.957	0.451	0
M01654	Arid3a	Mouse:Late_NG	0	2.71496	0.991	0.485	0
M03546	Dlx5	Mouse:Late_NG	0	2.71496	0.991	0.485	0
M10301	Myod1	Mouse:Late_NG	0	2.85234	0.927	0.421	0
M09993	Myod1	Mouse:Late_NG	0	2.81449	0.925	0.42	0
M04399	Meox2	Mouse:Late_NG	0	2.72	0.973	0.468	0
M01336	Hoxa7	Mouse:Late_NG	0	2.66697	0.966	0.462	0
M01385	Pax4	Mouse:Late_NG	0	3.09675	0.979	0.475	0
M01418	Lhx1	Mouse:Late_NG	0	2.57727	0.968	0.464	0
M09698	Myod1	Mouse:Late_NG	0	2.84111	0.923	0.419	0
M09865	Ascl1	Mouse:Late_NG	0	2.77117	0.936	0.432	0
M01356	Phox2b	Mouse:Late_NG	0	2.75351	0.966	0.463	0
M01330	Hoxb3	Mouse:Late_NG	0	2.64309	0.968	0.466	0
M01355	Alx3	Mouse:Late_NG	0	2.91922	0.975	0.473	0
M08003	Pou6f1	Mouse:Late_NG	0	2.56167	0.96	0.458	0
M01348	Prrx1	Mouse:Late_NG	0	2.80657	0.972	0.471	0
M00241	Nkx2-5	Mouse:Late_NG	0	2.12139	0.945	0.445	0
M01323	Otp	Mouse:Late_NG	0	2.73132	0.968	0.468	0
M10099	Tcf3	Mouse:Late_NG	0	2.5956	0.919	0.42	0
M10402	Tcf3	Mouse:Late_NG	0	2.5956	0.919	0.42	0
M04450	Vsx1	Mouse:Late_NG	0	2.78524	0.974	0.475	0
M01391	Pax6	Mouse:Late_NG	0	2.44892	0.962	0.463	0
M01431	Barx2	Mouse:Late_NG	0	2.43053	0.957	0.458	0
M08770	Hoxa3	Mouse:Late_NG	0	2.91498	0.973	0.475	0
M08981	Vsx1	Mouse:Late_NG	0	3.0947	0.979	0.481	0
M04333	Hmx1	Mouse:Late_NG	0	2.02482	0.941	0.443	0
M10177	Ascl1	Mouse:Late_NG	0	2.71865	0.929	0.432	0
M01360	Dbx2	Mouse:Late_NG	0	2.24478	0.948	0.451	0
M08822	Msx1	Mouse:Late_NG	0	2.26397	0.96	0.463	0
M01438	Pdx1	Mouse:Late_NG	0	2.70027	0.971	0.476	0
M01314	Lhx6	Mouse:Late_NG	0	2.5443	0.966	0.472	0
M01409	Lmx1a	Mouse:Late_NG	0	2.16675	0.956	0.462	0
M01353	Lhx5	Mouse:Late_NG	0	2.38873	0.963	0.47	0
M00640	Hoxa4	Mouse:Late_NG	0	2.0006	0.943	0.45	0
M04299	Dlx1	Mouse:Late_NG	0	2.31808	0.951	0.458	0
M08041	Dlx1	Mouse:Late_NG	0	2.31808	0.951	0.458	0
M04184	Nhlh1	Mouse:Late_NG	0	2.15568	0.916	0.424	0
M01326	Gsx2	Mouse:Late_NG	0	2.82536	0.973	0.481	0
M01469	Nkx6-1	Mouse:Late_NG	0	2.18811	0.948	0.456	0
M01486	Dlx4	Mouse:Late_NG	0	2.12667	0.947	0.455	0
M04446	Vax1	Mouse:Late_NG	0	2.26971	0.951	0.459	0
M04447	Vax2	Mouse:Late_NG	0	2.26971	0.951	0.459	0
M01471	Lhx3	Mouse:Late_NG	0	2.34665	0.961	0.47	0
M04320	Evx1	Mouse:Late_NG	0	2.42042	0.963	0.472	0
M01338	Hoxd3	Mouse:Late_NG	0	2.50623	0.971	0.481	0
M04365	Hoxd8	Mouse:Late_NG	0	2.54363	0.966	0.476	0
M01452	Hoxa5	Mouse:Late_NG	0	2.62207	0.969	0.482	0
M09962	Tcf4	Mouse:Late_NG	0	2.55918	0.91	0.424	0
M04395	Lhx8	Mouse:Late_NG	0	2.0195	0.945	0.459	0
M00437	Vsx2	Mouse:Late_NG	0	2.775	0.966	0.482	0
M01422	Lhx6	Mouse:Late_NG	0	2.44775	0.959	0.475	0
M01439	Dlx1	Mouse:Late_NG	0	2.42984	0.956	0.473	0
M00510	Lhx3	Mouse:Late_NG	0	2.51412	0.956	0.474	0
M01971	Lhx3	Mouse:Late_NG	0	2.25268	0.953	0.471	0
M01363	Lmx1b	Mouse:Late_NG	0	2.12706	0.949	0.47	0
M04321	Evx2	Mouse:Late_NG	0	2.46554	0.955	0.476	0
M02100	Myod1	Mouse:Late_NG	0	2.48463	0.916	0.438	0
M01397	Vax1	Mouse:Late_NG	0	2.56342	0.966	0.488	0
M04400	Meox2	Mouse:Late_NG	0	2.0224	0.938	0.46	0
M01319	Hoxb5	Mouse:Late_NG	0	2.50531	0.96	0.483	0
M04404	Msx1	Mouse:Late_NG	0	2.01117	0.935	0.459	0
M01402	Hoxa2	Mouse:Late_NG	0	2.43897	0.961	0.485	0
M01388	Dlx5	Mouse:Late_NG	0	2.13833	0.936	0.461	0
M01421	Lhx4	Mouse:Late_NG	0	2.31711	0.953	0.48	0
M01440	Lhx8	Mouse:Late_NG	0	2.19991	0.949	0.476	0
M01487	Hoxa1	Mouse:Late_NG	0	2.42958	0.958	0.489	0
M01442	Bsx	Mouse:Late_NG	0	2.03337	0.928	0.465	0
M02781	Myf6	Mouse:Late_NG	0	2.13076	0.906	0.443	0
M04386	Lhx2	Mouse:Late_NG	0	2.05202	0.937	0.476	0
M10411	Vsx2	Mouse:Late_NG	0	2.23019	0.951	0.494	0
M00184	Myod1	Mouse:Late_NG	0	2.59303	0.887	0.497	0
M07609	Neurog2	Mouse:Late_NG	4.58543e-305	2.73567	0.899	0.409	2.09004e-301
M00698	Tcf12	Mouse:Late_NG	2.52255e-299	2.01878	0.896	0.434	1.14978e-295
M00002	Tcf3	Mouse:Late_NG	1.62619e-298	2.23274	0.867	0.455	7.41218e-295
M00693	Tcf3	Mouse:Late_NG	3.99047e-295	2.01189	0.862	0.511	1.81885e-291
M09703	Olig2	Mouse:Late_NG	2.33656e-293	2.76053	0.911	0.416	1.06501e-289
M02088	Tcf3	Mouse:Late_NG	5.62208e-293	2.21821	0.873	0.463	2.56255e-289
M10019	Olig2	Mouse:Late_NG	3.93756e-291	2.7927	0.896	0.411	1.79474e-287
M10329	Olig2	Mouse:Late_NG	3.93756e-291	2.7927	0.896	0.411	1.79474e-287
M01716	Atoh1,Tcf3	Mouse:Late_NG	1.67486e-286	2.13089	0.892	0.431	7.63399e-283
M09977	Lyl1	Mouse:Late_NG	1.61918e-281	2.09903	0.888	0.426	7.38021e-278
M10285	Lyl1	Mouse:Late_NG	1.61918e-281	2.09903	0.888	0.426	7.38021e-278
M09674	Atoh1	Mouse:Late_NG	3.24602e-271	3.84651	0.889	0.418	1.47954e-267
M10070	Sox9	Mouse:Late_NG	4.34591e-264	3.29111	0.977	0.343	1.98086e-260
M10374	Sox9	Mouse:Late_NG	4.34591e-264	3.29111	0.977	0.343	1.98086e-260
M10065	Sox10	Mouse:Late_NG	1.41421e-248	2.95836	0.956	0.338	6.44596e-245
M10371	Sox10	Mouse:Late_NG	1.41421e-248	2.95836	0.956	0.338	6.44596e-245
M09870	Atoh1	Mouse:Late_NG	4.72826e-248	3.6324	0.879	0.42	2.15514e-244
M10182	Atoh1	Mouse:Late_NG	4.72826e-248	3.6324	0.879	0.42	2.15514e-244
M08838	Sox9	Mouse:Late_NG	1.95669e-240	2.35285	0.936	0.351	8.91858e-237
M10296	Msgn1	Mouse:Late_NG	5.28169e-237	2.47297	0.842	0.419	2.4074e-233
M10305	Neurod2	Mouse:Late_NG	5.96029e-231	3.59054	0.862	0.429	2.7167e-227
M09998	Neurod2	Mouse:Late_NG	1.04395e-229	3.51683	0.857	0.425	4.75832e-226
M00993	Tal1	Mouse:Late_NG	3.74114e-229	2.89389	0.858	0.442	1.70521e-225
M04195	Tcf21	Mouse:Late_NG	8.05624e-225	2.04635	0.858	0.412	3.67204e-221
M10315	Neurog2	Mouse:Late_NG	2.43708e-222	3.53986	0.856	0.425	1.11082e-218
M07075	Atoh1	Mouse:Late_NG	1.32937e-205	2.85394	0.838	0.435	6.05926e-202
Atoh7-Custom		Mouse:Late_NG	2.75784e-195	2.23865	0.816	0.416	1.25703e-191
M09997	Neurod1	Mouse:Late_NG	2.53214e-190	3.38725	0.832	0.428	1.15415e-186
M10304	Neurod1	Mouse:Late_NG	2.53214e-190	3.38725	0.832	0.428	1.15415e-186
M09701	Neurod1	Mouse:Late_NG	6.49748e-181	3.11606	0.821	0.44	2.96155e-177
M03804	Tal1	Mouse:Late_NG	3.08748e-164	2.80658	0.793	0.446	1.40727e-160
M09776	Neurod1	Mouse:Late_NG	4.72538e-153	2.97066	0.793	0.449	2.15383e-149
M00070	Tal1,Tcf4	Mouse:Late_NG	4.3796e-134	2.32979	0.777	0.451	1.99622e-130
M00066	Tal1,Tcf3	Mouse:Late_NG	4.5744e-132	2.31998	0.778	0.446	2.08501e-128
M02927	Tcf3	Mouse:Late_NG	2.09686e-124	2.11933	0.756	0.451	9.55748e-121
M09590	Tfap2a	Mouse:ACHC	0	4.51369	0.928	0.258	0
M07231	Tfap2a	Mouse:ACHC	0	4.39093	0.915	0.265	0
M09591	Tfap2c	Mouse:ACHC	0	4.06435	0.925	0.279	0
M02821	Tfap2c	Mouse:ACHC	0	3.68455	0.93	0.287	0
M07137	Tfap2c	Mouse:ACHC	0	3.87615	0.925	0.289	0
M10175	Tfap2a	Mouse:ACHC	0	3.61747	0.918	0.282	0
M10101	Tgif1	Mouse:ACHC	0	3.71011	0.947	0.315	0
M02822	Tfap2e	Mouse:ACHC	0	3.64542	0.926	0.297	0
M02819	Tfap2a	Mouse:ACHC	0	3.36776	0.927	0.301	0
M10176	Tfap2c	Mouse:ACHC	0	3.49737	0.917	0.291	0
M10404	Tgif1	Mouse:ACHC	0	3.38439	0.936	0.332	0
M04896	Tfap2a	Mouse:ACHC	0	3.38759	0.905	0.302	0
M00418	Tgif1	Mouse:ACHC	0	3.17411	0.922	0.32	0
M01045	Tfap2a	Mouse:ACHC	0	3.28252	0.905	0.306	0
M01411	Pknox2	Mouse:ACHC	0	3.11197	0.927	0.335	0
M04149	Tfap2b	Mouse:ACHC	0	3.18833	0.908	0.317	0
M02820	Tfap2b	Mouse:ACHC	0	3.25075	0.903	0.314	0
M04150	Tfap2b	Mouse:ACHC	0	2.95182	0.903	0.327	0
M01346	Tgif1	Mouse:ACHC	0	3.10536	0.913	0.338	0
M04147	Tfap2a	Mouse:ACHC	0	2.79965	0.905	0.333	0
M04152	Tfap2c	Mouse:ACHC	0	2.9203	0.903	0.335	0
M07111	Meis1	Mouse:ACHC	0	3.18211	0.912	0.345	0
M04146	Tfap2a	Mouse:ACHC	0	2.73708	0.898	0.331	0
M00470	Tfap2c	Mouse:ACHC	0	2.5523	0.9	0.342	0
M01407	Tgif2	Mouse:ACHC	0	2.70366	0.908	0.353	0
M04155	Tfap2a	Mouse:ACHC	0	2.62986	0.891	0.338	0
M01395	Meis3	Mouse:ACHC	0	2.6617	0.899	0.347	0
M01459	Pknox1	Mouse:ACHC	0	2.67897	0.904	0.353	0
M01488	Meis2	Mouse:ACHC	0	2.58423	0.898	0.348	0
M01419	Meis1	Mouse:ACHC	0	2.56808	0.896	0.348	0
M04154	Tfap2c	Mouse:ACHC	0	2.66962	0.898	0.35	0
M04156	Tfap2a	Mouse:ACHC	0	2.48117	0.894	0.35	0
M00419	Meis1	Mouse:ACHC	0	2.75804	0.89	0.349	0
M04065	Pax6	Mouse:ACHC	0	3.22841	0.924	0.384	0
M02924	Tfap2b	Mouse:ACHC	0	2.38774	0.891	0.354	0
M08439	Prrxl1,Tfap2c	Mouse:ACHC	0	2.3664	0.887	0.353	0
M04029	Meis2	Mouse:ACHC	0	2.4844	0.877	0.351	0
M04035	Meis3	Mouse:ACHC	0	2.45551	0.874	0.373	0
M04027	Meis1	Mouse:ACHC	0	2.35998	0.855	0.357	0
M04032	Meis2	Mouse:ACHC	0	2.35998	0.855	0.357	0
M04034	Meis3	Mouse:ACHC	0	2.35998	0.855	0.357	0
M10028	Pax6	Mouse:ACHC	0	2.14134	0.894	0.396	0
M10335	Pax6	Mouse:ACHC	0	2.14134	0.894	0.396	0
M04039	Tgif1	Mouse:ACHC	0	2.50721	0.87	0.373	0
M04064	Pax5	Mouse:ACHC	0	2.16781	0.889	0.398	0
M04030	Meis3	Mouse:ACHC	0	2.28567	0.845	0.363	0
M04033	Meis2	Mouse:ACHC	0	2.51031	0.868	0.386	0
M04099	Rfx4	Mouse:ACHC	0	2.5151	0.881	0.402	0
M04095	Rfx2	Mouse:ACHC	0	2.58524	0.884	0.408	0
M04097	Rfx3	Mouse:ACHC	0	2.53621	0.882	0.406	0
M04101	Rfx5	Mouse:ACHC	0	2.49001	0.88	0.408	0
M04103	Rfx2	Mouse:ACHC	0	2.5031	0.878	0.407	0
M04041	Tgif2	Mouse:ACHC	0	2.31641	0.85	0.38	0
M04102	Rfx5	Mouse:ACHC	0	2.36366	0.875	0.41	0
M04724	Mxi1	Mouse:ACHC	0	2.10251	0.869	0.408	0
M04040	Tgif2lx1	Mouse:ACHC	0	2.29903	0.866	0.405	0
M04031	Meis3	Mouse:ACHC	0	2.30322	0.853	0.393	0
M04105	Rfx3	Mouse:ACHC	0	2.41172	0.872	0.414	0
M04038	Pknox2	Mouse:ACHC	0	2.23801	0.846	0.393	0
M04741	Srebf1	Mouse:ACHC	0	2.02749	0.871	0.419	0
M04036	Pknox1	Mouse:ACHC	0	2.24929	0.839	0.39	0
M09002	Rfx2	Mouse:ACHC	0	2.15251	0.858	0.411	0
M10048	Rfx2	Mouse:ACHC	0	2.01853	0.866	0.424	0
M00281	Rfx1	Mouse:ACHC	0	2.02464	0.86	0.419	0
M09780	Pbx2	Mouse:ACHC	0	2.04396	0.814	0.386	0
M04037	Pknox2	Mouse:ACHC	0	2.07257	0.799	0.415	0
M00176	Tfap4	Mouse:ACHC	0	2.09772	0.679	0.407	0
M04184	Nhlh1	Mouse:ACHC	0	2.0813	0.675	0.404	0
M07134	Tcf12	Mouse:ACHC	0	2.33746	0.605	0.403	0
M07113	Myog	Mouse:ACHC	0	2.31823	0.605	0.404	0
M09993	Myod1	Mouse:ACHC	0	2.03023	0.6	0.412	0
M07112	Myod1	Mouse:ACHC	0	2.10197	0.597	0.412	0
M00927	Tfap4	Mouse:ACHC	0	2.12834	0.59	0.41	0
M04159	Ascl2	Mouse:ACHC	0	2.15404	0.587	0.407	0
M09691	Tcf12	Mouse:ACHC	0	2.06414	0.583	0.409	0
M10351	Ptf1a	Mouse:ACHC	1.39032e-271	2.1489	0.545	0.408	6.33709e-268
M04418	Otx1	Mouse:Cone	0	6.63681	0.999	0.449	0
M04422	Otx1	Mouse:Cone	0	6.62737	0.999	0.449	0
M07057	Pitx3	Mouse:Cone	0	3.80156	0.997	0.449	0
M08997	Gata3	Mouse:Cone	0	3.06053	0.987	0.44	0
M00127	Gata1	Mouse:Cone	0	3.61271	0.993	0.449	0
M04420	Otx2	Mouse:Cone	0	6.66931	0.999	0.456	0
M01735	Pitx3	Mouse:Cone	0	5.31738	0.999	0.458	0
M09888	Crx	Mouse:Cone	0	8.37592	1	0.461	0
M10201	Crx	Mouse:Cone	0	8.37592	1	0.461	0
M03838	Otx1	Mouse:Cone	0	3.89831	0.996	0.458	0
M01229	Gtf2ird1	Mouse:Cone	0	4.05043	0.997	0.46	0
M01826	Pitx1	Mouse:Cone	0	3.42631	0.995	0.458	0
M00623	Crx,Rax	Mouse:Cone	0	4.64669	0.998	0.462	0
M07081	Crx	Mouse:Cone	0	7.7925	1	0.465	0
M07392	Pitx3	Mouse:Cone	0	5.14421	0.998	0.463	0
M09680	Crx	Mouse:Cone	0	8.02764	0.999	0.466	0
M07055	Pitx1	Mouse:Cone	0	4.87238	0.998	0.466	0
M01343	Pitx3	Mouse:Cone	0	6.03174	0.999	0.468	0
M01877	Gata2	Mouse:Cone	0	2.62924	0.976	0.445	0
M04423	Otx1	Mouse:Cone	0	4.58977	0.998	0.467	0
M01719	Otx2	Mouse:Cone	0	5.89179	0.999	0.469	0
M04421	Otx2	Mouse:Cone	0	5.61837	0.999	0.469	0
M04428	Pitx1	Mouse:Cone	0	5.96388	0.999	0.469	0
M07352	Crx	Mouse:Cone	0	6.13284	0.999	0.469	0
M01712	Crx	Mouse:Cone	0	5.52769	0.999	0.47	0
M08728	Eomes,Pitx1	Mouse:Cone	0	2.48098	0.97	0.441	0
M06790	Zbtb12	Mouse:Cone	0	2.64574	0.98	0.452	0
M08895	Pitx1,Pitx2,Pitx3	Mouse:Cone	0	6.29162	0.999	0.471	0
M10338	Pitx1	Mouse:Cone	0	6.58812	0.999	0.471	0
M01436	Crx	Mouse:Cone	0	5.74331	0.999	0.472	0
M04325	Gsc2	Mouse:Cone	0	6.44061	0.999	0.472	0
M04429	Pitx3	Mouse:Cone	0	6.32724	0.999	0.472	0
M10021	Otx2	Mouse:Cone	0	7.82467	0.999	0.472	0
M01428	Gsc	Mouse:Cone	0	5.76397	0.999	0.473	0
M01484	Pitx1	Mouse:Cone	0	6.1603	0.999	0.473	0
M04505	Pitx1	Mouse:Cone	0	5.82352	0.999	0.473	0
M04623	Otx2	Mouse:Cone	0	6.65123	0.999	0.473	0
M04305	Dmbx1	Mouse:Cone	0	5.86047	0.998	0.473	0
M04326	Gsc	Mouse:Cone	0	6.53174	0.999	0.474	0
M00789	Gata1,Gata2,Gata3,Gata4,Gata5,Gata6	Mouse:Cone	0	2.47088	0.962	0.438	0
M03216	Gata6	Mouse:Cone	0	2.47088	0.962	0.438	0
M08765	Gata1	Mouse:Cone	0	2.47088	0.962	0.438	0
M01387	Otx2	Mouse:Cone	0	4.99284	0.997	0.475	0
M08477	Foxj2,Pitx1	Mouse:Cone	0	2.85962	0.984	0.463	0
M01366	Otx1	Mouse:Cone	0	4.81492	0.997	0.477	0
M01878	Gata3	Mouse:Cone	0	2.10425	0.97	0.456	0
M07428	Six3	Mouse:Cone	0	2.52211	0.975	0.461	0
M06736	Zfp354b	Mouse:Cone	0	2.32601	0.967	0.454	0
M06932	Shox2	Mouse:Cone	0	2.80282	0.968	0.455	0
M08733	Hoxa3,Pitx1	Mouse:Cone	0	2.69831	0.972	0.459	0
M06956	Prrxl1	Mouse:Cone	0	2.79631	0.967	0.456	0
M09807	Gata2	Mouse:Cone	0	2.27822	0.952	0.441	0
M06984	Rax	Mouse:Cone	0	2.69332	0.966	0.456	0
M06946	Prrx1	Mouse:Cone	0	2.52752	0.962	0.455	0
M06926	Arx	Mouse:Cone	0	2.59422	0.96	0.454	0
M06980	Mixl1	Mouse:Cone	0	2.52115	0.961	0.455	0
M06994	Mixl1	Mouse:Cone	0	2.58988	0.961	0.456	0
M04419	Otx1	Mouse:Cone	0	2.18646	0.944	0.44	0
M06974	Prrx2	Mouse:Cone	0	2.44325	0.957	0.453	0
M04713	Gata1	Mouse:Cone	0	2.23503	0.944	0.441	0
M10252	Gata6	Mouse:Cone	0	2.10405	0.943	0.443	0
M09622	Gata2	Mouse:Cone	0	2.06192	0.947	0.448	0
M08501	Hoxb2,Pitx1	Mouse:Cone	0	2.27957	0.96	0.462	0
M00065	Tal1,Tcf3	Mouse:Cone	0	2.67365	0.81	0.439	0
M00066	Tal1,Tcf3	Mouse:Cone	0	2.62355	0.786	0.427	0
M02927	Tcf3	Mouse:Cone	0	2.50891	0.786	0.431	0
M00070	Tal1,Tcf4	Mouse:Cone	0	2.60213	0.779	0.433	0
M09776	Neurod1	Mouse:Cone	0	3.17059	0.776	0.432	0
M03804	Tal1	Mouse:Cone	0	2.84338	0.769	0.429	0
M09701	Neurod1	Mouse:Cone	0	2.85109	0.756	0.425	0
M10406	Thra	Mouse:Cone	0	2.09972	0.762	0.442	0
M09997	Neurod1	Mouse:Cone	2.20395e-301	2.75161	0.722	0.417	1.00456e-297
M10304	Neurod1	Mouse:Cone	2.20395e-301	2.75161	0.722	0.417	1.00456e-297
M07075	Atoh1	Mouse:Cone	5.5911e-288	2.16486	0.731	0.423	2.54842e-284
M00993	Tal1	Mouse:Cone	2.19461e-286	2.00246	0.747	0.43	1.0003e-282
M10305	Neurod2	Mouse:Cone	1.62594e-280	2.46403	0.714	0.42	7.41103e-277
M09998	Neurod2	Mouse:Cone	4.06077e-260	2.29871	0.695	0.418	1.8509e-256
M10315	Neurog2	Mouse:Cone	1.81525e-248	2.30759	0.695	0.417	8.2739e-245
M09870	Atoh1	Mouse:Cone	2.74581e-230	2.09097	0.678	0.414	1.25154e-226
M10182	Atoh1	Mouse:Cone	2.74581e-230	2.09097	0.678	0.414	1.25154e-226
M07609	Neurog2	Mouse:Photo_BC	0	4.87287	0.997	0.397	0
M10019	Olig2	Mouse:Photo_BC	0	5.06249	0.996	0.398	0
M10329	Olig2	Mouse:Photo_BC	0	5.06249	0.996	0.398	0
M10351	Ptf1a	Mouse:Photo_BC	0	4.39795	0.994	0.396	0
Atoh7-Custom		Mouse:Photo_BC	0	4.76758	0.996	0.4	0
M01808	Mycn	Mouse:Photo_BC	0	4.29828	0.994	0.4	0
M09674	Atoh1	Mouse:Photo_BC	0	7.54809	0.999	0.405	0
M09875	Bhlha15	Mouse:Photo_BC	0	4.55936	0.994	0.401	0
M10188	Bhlha15	Mouse:Photo_BC	0	4.55936	0.994	0.401	0
M09870	Atoh1	Mouse:Photo_BC	0	7.44757	0.999	0.407	0
M10182	Atoh1	Mouse:Photo_BC	0	7.44757	0.999	0.407	0
M09703	Olig2	Mouse:Photo_BC	0	4.8303	0.996	0.404	0
M10296	Msgn1	Mouse:Photo_BC	0	5.05664	0.996	0.405	0
M07134	Tcf12	Mouse:Photo_BC	0	4.09681	0.991	0.401	0
M04195	Tcf21	Mouse:Photo_BC	0	3.80532	0.987	0.398	0
M07113	Myog	Mouse:Photo_BC	0	4.06579	0.991	0.402	0
M09998	Neurod2	Mouse:Photo_BC	0	7.4699	0.999	0.411	0
M04159	Ascl2	Mouse:Photo_BC	0	4.13546	0.99	0.402	0
M09767	Ascl1	Mouse:Photo_BC	0	4.00222	0.992	0.404	0
M10315	Neurog2	Mouse:Photo_BC	0	7.45657	0.998	0.411	0
M09997	Neurod1	Mouse:Photo_BC	0	7.6993	0.999	0.413	0
M10304	Neurod1	Mouse:Photo_BC	0	7.6993	0.999	0.413	0
M00927	Tfap4	Mouse:Photo_BC	0	4.16718	0.991	0.405	0
M02737	Ascl2	Mouse:Photo_BC	0	3.91976	0.992	0.406	0
M09691	Tcf12	Mouse:Photo_BC	0	4.00088	0.989	0.403	0
M10305	Neurod2	Mouse:Photo_BC	0	7.6387	1	0.416	0
M07112	Myod1	Mouse:Photo_BC	0	4.10487	0.989	0.408	0
M10301	Myod1	Mouse:Photo_BC	0	4.13353	0.991	0.41	0
M07075	Atoh1	Mouse:Photo_BC	0	6.35078	1	0.42	0
M09698	Myod1	Mouse:Photo_BC	0	3.9703	0.988	0.408	0
M10178	Ascl2	Mouse:Photo_BC	0	3.88282	0.986	0.406	0
M09962	Tcf4	Mouse:Photo_BC	0	3.87949	0.992	0.413	0
M09993	Myod1	Mouse:Photo_BC	0	3.93263	0.987	0.409	0
M10099	Tcf3	Mouse:Photo_BC	0	3.40085	0.985	0.409	0
M10402	Tcf3	Mouse:Photo_BC	0	3.40085	0.985	0.409	0
M09701	Neurod1	Mouse:Photo_BC	0	7.36406	0.998	0.424	0
M09977	Lyl1	Mouse:Photo_BC	0	3.61029	0.988	0.414	0
M10285	Lyl1	Mouse:Photo_BC	0	3.61029	0.988	0.414	0
M00993	Tal1	Mouse:Photo_BC	0	6.10394	0.999	0.429	0
M03804	Tal1	Mouse:Photo_BC	0	6.97991	0.999	0.43	0
M01716	Atoh1,Tcf3	Mouse:Photo_BC	0	3.44003	0.987	0.419	0
M00066	Tal1,Tcf3	Mouse:Photo_BC	0	5.7134	0.995	0.429	0
M00698	Tcf12	Mouse:Photo_BC	0	3.4578	0.989	0.423	0
M09776	Neurod1	Mouse:Photo_BC	0	7.47859	0.997	0.433	0
M02927	Tcf3	Mouse:Photo_BC	0	5.54002	0.996	0.433	0
M02100	Myod1	Mouse:Photo_BC	0	3.65962	0.989	0.427	0
M00070	Tal1,Tcf4	Mouse:Photo_BC	0	5.76275	0.995	0.434	0
M09865	Ascl1	Mouse:Photo_BC	0	3.49819	0.982	0.422	0
M09951	Tcf12	Mouse:Photo_BC	0	2.99469	0.981	0.422	0
M00175	Tfap4	Mouse:Photo_BC	0	2.81417	0.979	0.421	0
M10177	Ascl1	Mouse:Photo_BC	0	3.49547	0.979	0.422	0
M07422	Ascl1	Mouse:Photo_BC	0	3.5995	0.987	0.431	0
M04184	Nhlh1	Mouse:Photo_BC	0	2.63059	0.967	0.414	0
M10097	Tfap4	Mouse:Photo_BC	0	2.44551	0.965	0.412	0
M04181	Myf6	Mouse:Photo_BC	0	2.55732	0.96	0.408	0
M04570	Msc	Mouse:Photo_BC	0	2.69379	0.969	0.418	0
M00065	Tal1,Tcf3	Mouse:Photo_BC	0	5.35288	0.993	0.443	0
M04183	Neurog2	Mouse:Photo_BC	0	3.18515	0.976	0.427	0
M00002	Tcf3	Mouse:Photo_BC	0	3.5264	0.986	0.442	0
M00176	Tfap4	Mouse:Photo_BC	0	2.40951	0.961	0.417	0
M10407	Twist1	Mouse:Photo_BC	0	2.36924	0.961	0.417	0
M02088	Tcf3	Mouse:Photo_BC	0	3.79116	0.991	0.45	0
M07469	Lyl1,Nhlh2,Tal1	Mouse:Photo_BC	0	3.13286	0.979	0.44	0
M02781	Myf6	Mouse:Photo_BC	0	2.95364	0.969	0.433	0
M10103	Twist1	Mouse:Photo_BC	0	2.26862	0.953	0.42	0
M00068	Nhlh1	Mouse:Photo_BC	0	2.3455	0.96	0.428	0
M04192	Tfap4	Mouse:Photo_BC	0	2.17121	0.948	0.417	0
M01288	Neurod1	Mouse:Photo_BC	0	2.58091	0.974	0.445	0
M00058	Nhlh1	Mouse:Photo_BC	0	2.24574	0.949	0.421	0
M03880	Myf5	Mouse:Photo_BC	0	2.86043	0.969	0.442	0
M01860	Tfap4	Mouse:Photo_BC	0	2.09768	0.96	0.435	0
M04160	Atoh1	Mouse:Photo_BC	0	2.75203	0.961	0.436	0
M04165	Bhlhe23	Mouse:Photo_BC	0	2.51943	0.957	0.433	0
M08028	Bhlhe22	Mouse:Photo_BC	0	2.51943	0.957	0.433	0
M01287	Neurod1,Neurod2	Mouse:Photo_BC	0	2.64997	0.958	0.435	0
M04182	Neurod2	Mouse:Photo_BC	0	2.64997	0.958	0.435	0
M09721	Tcf3	Mouse:Photo_BC	0	2.5969	0.963	0.443	0
M04931	Tcf12	Mouse:Photo_BC	0	2.21329	0.967	0.449	0
M10264	Tcf12	Mouse:Photo_BC	0	2.99504	0.982	0.464	0
M04164	Bhlhe22	Mouse:Photo_BC	0	2.54491	0.953	0.436	0
M08027	Bhlhe23	Mouse:Photo_BC	0	2.54491	0.953	0.436	0
M07999	Neurog1	Mouse:Photo_BC	0	2.64031	0.954	0.439	0
M09790	Twist1	Mouse:Photo_BC	0	2.21174	0.911	0.397	0
M04187	Olig3	Mouse:Photo_BC	0	2.34946	0.941	0.431	0
M07983	Bhlha15	Mouse:Photo_BC	0	2.29644	0.943	0.433	0
M00184	Myod1	Mouse:Photo_BC	0	4.48293	0.995	0.486	0
M04185	Olig1	Mouse:Photo_BC	0	2.4548	0.941	0.433	0
M04186	Olig2	Mouse:Photo_BC	0	2.32854	0.942	0.435	0
M04441	Shox2	Mouse:Photo_BC	0	3.33999	0.959	0.456	0
M04037	Pknox2	Mouse:Photo_BC	0	2.25163	0.946	0.444	0
M04161	Bhlha15	Mouse:Photo_BC	0	2.5549	0.945	0.444	0
M04381	Isx	Mouse:Photo_BC	0	2.98432	0.952	0.453	0
M04390	Lhx9	Mouse:Photo_BC	0	2.98432	0.952	0.453	0
M04431	Prrx1	Mouse:Photo_BC	0	2.98432	0.952	0.453	0
M04433	Prrx2	Mouse:Photo_BC	0	2.98432	0.952	0.453	0
M04439	Shox2	Mouse:Photo_BC	0	2.98432	0.952	0.453	0
M04384	Lbx2	Mouse:Photo_BC	0	3.1405	0.95	0.452	0
M08951	Myf6	Mouse:Photo_BC	0	2.0304	0.934	0.44	0
M04385	Lhx2	Mouse:Photo_BC	0	3.06084	0.952	0.462	0
M01474	Esx1	Mouse:Photo_BC	0	2.72155	0.95	0.461	0
M04327	Gsx1	Mouse:Photo_BC	0	2.94531	0.938	0.449	0
M04319	Esx1	Mouse:Photo_BC	0	2.98223	0.949	0.462	0
M04329	Gbx1	Mouse:Photo_BC	0	3.07444	0.947	0.46	0
M07994	Lbx1	Mouse:Photo_BC	0	2.46723	0.94	0.455	0
M01441	Nobox	Mouse:Photo_BC	0	2.63351	0.935	0.451	0
M04396	Lhx8	Mouse:Photo_BC	0	2.83999	0.941	0.457	0
M04402	Mixl1	Mouse:Photo_BC	0	2.74262	0.947	0.464	0
M04312	Emx1	Mouse:Photo_BC	0	2.89277	0.942	0.46	0
M07425	Msx2	Mouse:Photo_BC	0	2.67738	0.944	0.463	0
M02288	Plac8	Mouse:Photo_BC	0	2.67738	0.944	0.463	0
M10282	Lhx2	Mouse:Photo_BC	0	2.71485	0.929	0.45	0
M00001	Myod1	Mouse:Photo_BC	0	2.34081	0.951	0.472	0
M04417	Noto	Mouse:Photo_BC	0	2.99977	0.939	0.46	0
M04279	Alx3	Mouse:Photo_BC	0	2.6007	0.935	0.457	0
M04343	Hoxa1	Mouse:Photo_BC	0	2.81509	0.942	0.464	0
M04415	Nkx6-1	Mouse:Photo_BC	0	2.45412	0.936	0.46	0
M04416	Nkx6-2	Mouse:Photo_BC	0	2.45412	0.936	0.46	0
M01389	Rax	Mouse:Photo_BC	0	2.4731	0.928	0.453	0
M04392	Lmx1a	Mouse:Photo_BC	0	2.60853	0.937	0.462	0
M04393	Lmx1b	Mouse:Photo_BC	0	2.60853	0.937	0.462	0
M04394	Lhx4	Mouse:Photo_BC	0	2.60853	0.937	0.462	0
M04445	Uncx	Mouse:Photo_BC	0	2.60853	0.937	0.462	0
M07047	Lhx2	Mouse:Photo_BC	0	2.31901	0.938	0.463	0
M00693	Tcf3	Mouse:Photo_BC	0	3.28188	0.973	0.499	0
M00804	Myf6,Myod1,Tcf3	Mouse:Photo_BC	0	2.59469	0.961	0.487	0
M01401	Lbx2	Mouse:Photo_BC	0	2.37667	0.93	0.457	0
M04430	Prop1	Mouse:Photo_BC	0	2.1354	0.939	0.466	0
M04292	Bsx	Mouse:Photo_BC	0	2.36483	0.91	0.438	0
M04387	Lhx6	Mouse:Photo_BC	0	2.6898	0.936	0.464	0
M04405	Msx1	Mouse:Photo_BC	0	2.36483	0.91	0.438	0
M04407	Msx2	Mouse:Photo_BC	0	2.36483	0.91	0.438	0
M07988	Emx1	Mouse:Photo_BC	0	2.73701	0.934	0.462	0
M01326	Gsx2	Mouse:Photo_BC	0	2.60844	0.948	0.476	0
M08981	Vsx1	Mouse:Photo_BC	0	2.95275	0.947	0.475	0
M04348	Hoxb3	Mouse:Photo_BC	0	2.40036	0.923	0.452	0
M04435	Rax	Mouse:Photo_BC	0	2.58022	0.935	0.464	0
M04330	Hesx1	Mouse:Photo_BC	0	2.71889	0.939	0.468	0
M01339	Pax7	Mouse:Photo_BC	0	2.43919	0.93	0.46	0
M01382	Gbx2	Mouse:Photo_BC	0	2.54162	0.924	0.454	0
M01415	Shox2	Mouse:Photo_BC	0	2.67471	0.931	0.461	0
M04322	Gbx1	Mouse:Photo_BC	0	2.57299	0.923	0.453	0
M04328	Gsx2	Mouse:Photo_BC	0	2.54341	0.916	0.446	0
M04443	Uncx	Mouse:Photo_BC	0	2.57536	0.934	0.464	0
M04450	Vsx1	Mouse:Photo_BC	0	2.69183	0.94	0.47	0
M01355	Alx3	Mouse:Photo_BC	0	2.52884	0.938	0.468	0
M04347	Hoxb2	Mouse:Photo_BC	0	2.54048	0.933	0.464	0
M04349	Hoxb5	Mouse:Photo_BC	0	2.37768	0.926	0.457	0
M01327	Vax2	Mouse:Photo_BC	0	2.55098	0.923	0.455	0
M01479	Pou6f1	Mouse:Photo_BC	0	2.2575	0.918	0.45	0
M04314	Emx2	Mouse:Photo_BC	0	2.71337	0.931	0.463	0
M04324	Gbx2	Mouse:Photo_BC	0	2.48368	0.918	0.45	0
M01325	Lhx2	Mouse:Photo_BC	0	2.35129	0.923	0.456	0
M01331	Isx	Mouse:Photo_BC	0	2.28356	0.906	0.439	0
M01337	Hoxa3	Mouse:Photo_BC	0	2.43997	0.933	0.466	0
M04373	Hoxd3	Mouse:Photo_BC	0	2.47778	0.93	0.463	0
M01376	Prrx2	Mouse:Photo_BC	0	2.56865	0.93	0.465	0
M01461	Emx2	Mouse:Photo_BC	0	2.44155	0.918	0.453	0
M02944	Alx4	Mouse:Photo_BC	0	2.55239	0.923	0.458	0
M01385	Pax4	Mouse:Photo_BC	0	2.63035	0.934	0.471	0
M01448	Hoxd1	Mouse:Photo_BC	0	2.55499	0.932	0.469	0
M00099	Prrx2	Mouse:Photo_BC	0	2.47513	0.931	0.468	0
M01444	Phox2a	Mouse:Photo_BC	0	2.38087	0.912	0.449	0
M04091	Pou6f2	Mouse:Photo_BC	0	2.64128	0.912	0.449	0
M04318	En2	Mouse:Photo_BC	0	2.3368	0.912	0.449	0
M04380	Isx	Mouse:Photo_BC	0	2.50573	0.952	0.489	0
M01386	Evx2	Mouse:Photo_BC	0	2.51519	0.931	0.469	0
M01423	Arx	Mouse:Photo_BC	0	2.31391	0.918	0.456	0
M01455	En2	Mouse:Photo_BC	0	2.28125	0.913	0.451	0
M00437	Vsx2	Mouse:Photo_BC	0	2.59938	0.937	0.476	0
M01438	Pdx1	Mouse:Photo_BC	0	2.32709	0.932	0.471	0
M04427	Phox2b	Mouse:Photo_BC	0	2.10356	0.932	0.471	0
M01335	Vsx1	Mouse:Photo_BC	0	2.43161	0.924	0.463	0
M01417	Alx4	Mouse:Photo_BC	0	2.51087	0.922	0.461	0
M01427	Nkx1-2	Mouse:Photo_BC	0	2.03734	0.914	0.453	0
M00929	Myf6,Myod1,Tcf3	Mouse:Photo_BC	0	2.8159	0.962	0.501	0
M04368	Hoxa2	Mouse:Photo_BC	0	2.43471	0.923	0.463	0
M08912	En1	Mouse:Photo_BC	0	2.27267	0.914	0.454	0
M04444	Uncx	Mouse:Photo_BC	0	2.07416	0.934	0.475	0
M08770	Hoxa3	Mouse:Photo_BC	0	2.53804	0.93	0.471	0
M04614	Pdx1	Mouse:Photo_BC	0	2.19624	0.919	0.46	0
M01475	Evx1	Mouse:Photo_BC	0	2.30434	0.913	0.455	0
M10411	Vsx2	Mouse:Photo_BC	0	2.60383	0.946	0.488	0
M04426	Phox2a	Mouse:Photo_BC	0	2.10171	0.932	0.475	0
M01654	Arid3a	Mouse:Photo_BC	0	2.11879	0.937	0.481	0
M03546	Dlx5	Mouse:Photo_BC	0	2.11879	0.937	0.481	0
M04398	Meox1	Mouse:Photo_BC	0	2.40679	0.922	0.466	0
M01330	Hoxb3	Mouse:Photo_BC	0	2.12187	0.917	0.462	0
M10283	Lhx3	Mouse:Photo_BC	0	2.32765	0.913	0.458	0
M01422	Lhx6	Mouse:Photo_BC	0	2.30146	0.924	0.47	0
M01320	Prop1	Mouse:Photo_BC	0	2.28155	0.919	0.465	0
M01348	Prrx1	Mouse:Photo_BC	0	2.32301	0.921	0.467	0
M01458	Uncx	Mouse:Photo_BC	0	2.19814	0.916	0.462	0
M01477	Pou3f2	Mouse:Photo_BC	0	2.23546	0.91	0.456	0
M04316	En1	Mouse:Photo_BC	0	2.17593	0.895	0.442	0
M01402	Hoxa2	Mouse:Photo_BC	0	2.23912	0.932	0.48	0
M01397	Vax1	Mouse:Photo_BC	0	2.30479	0.934	0.483	0
M04432	Prrx1	Mouse:Photo_BC	0	2.12658	0.93	0.479	0
M07385	Lhx2	Mouse:Photo_BC	0	2.41273	0.912	0.461	0
M01452	Hoxa5	Mouse:Photo_BC	0	2.25996	0.927	0.477	0
M04344	Hoxa2	Mouse:Photo_BC	0	2.42703	0.909	0.459	0
M01412	Msx1	Mouse:Photo_BC	0	2.0564	0.906	0.459	0
M04321	Evx2	Mouse:Photo_BC	0	2.29599	0.918	0.472	0
M01487	Hoxa1	Mouse:Photo_BC	0	2.28993	0.929	0.484	0
M01233	Pdx1	Mouse:Photo_BC	0	2.20935	0.894	0.449	0
M04403	Mnx1	Mouse:Photo_BC	0	2.11519	0.903	0.458	0
M08949	Lhx6	Mouse:Photo_BC	0	2.18	0.91	0.465	0
M01319	Hoxb5	Mouse:Photo_BC	0	2.20494	0.922	0.479	0
M04425	Pdx1	Mouse:Photo_BC	0	2.04452	0.893	0.451	0
M04365	Hoxd8	Mouse:Photo_BC	0	2.17727	0.913	0.472	0
M08003	Pou6f1	Mouse:Photo_BC	0	2.00386	0.896	0.455	0
M01323	Otp	Mouse:Photo_BC	0	2.0911	0.903	0.464	0
M04399	Meox2	Mouse:Photo_BC	0	2.01764	0.903	0.464	0
M01424	Hoxb4	Mouse:Photo_BC	0	2.09493	0.897	0.459	0
M01314	Lhx6	Mouse:Photo_BC	0	2.08926	0.904	0.468	0
M04320	Evx1	Mouse:Photo_BC	0	2.19409	0.902	0.468	0
M01235	Pdx1	Mouse:Photo_BC	0	2.11379	0.891	0.458	0
M01421	Lhx4	Mouse:Photo_BC	0	2.10713	0.899	0.476	0
M03877	Ascl1	Mouse:Photo_BC	0	2.08284	0.939	0.516	0
M09976	Lhx2	Mouse:Photo_BC	1.28194e-307	2.53546	0.921	0.447	5.84309e-304
M01365	En1	Mouse:Photo_BC	2.27868e-298	2.12529	0.895	0.447	1.03862e-294
M01393	Msx2	Mouse:Photo_BC	6.39564e-294	2.02639	0.88	0.444	2.91513e-290
M08024	Pou6f2	Mouse:Photo_BC	1.73465e-291	2.12206	0.908	0.453	7.90653e-288
M01366	Otx1	Mouse:Photo_BC	4.10486e-239	2.93503	0.929	0.501	1.871e-235
M01162	Nobox	Mouse:Photo_BC	1.74776e-232	2.47585	0.907	0.447	7.96628e-229
M01387	Otx2	Mouse:Photo_BC	1.9288e-208	2.83164	0.926	0.499	8.79149e-205
M01428	Gsc	Mouse:Photo_BC	5.30562e-145	2.82125	0.905	0.498	2.4183e-141
M04305	Dmbx1	Mouse:Photo_BC	2.46629e-139	2.79925	0.908	0.499	1.12414e-135
M01436	Crx	Mouse:Photo_BC	1.9087e-132	2.73886	0.908	0.498	8.69984e-129
M04505	Pitx1	Mouse:Photo_BC	2.02416e-132	2.7414	0.91	0.498	9.22611e-129
M04326	Gsc	Mouse:Photo_BC	1.25783e-127	3.04296	0.912	0.499	5.7332e-124
M04429	Pitx3	Mouse:Photo_BC	1.12452e-125	2.94126	0.914	0.498	5.12556e-122
M01484	Pitx1	Mouse:Photo_BC	4.1213e-124	2.85007	0.9	0.499	1.87849e-120
M04623	Otx2	Mouse:Photo_BC	5.47408e-122	3.06987	0.906	0.499	2.49508e-118
M04423	Otx1	Mouse:Photo_BC	5.35908e-120	2.00546	0.855	0.495	2.44267e-116
M01712	Crx	Mouse:Photo_BC	1.38128e-119	2.38231	0.881	0.497	6.29588e-116
M04325	Gsc2	Mouse:Photo_BC	3.73206e-118	2.91389	0.909	0.498	1.70107e-114
M04428	Pitx1	Mouse:Photo_BC	2.56265e-111	2.56643	0.877	0.497	1.16806e-107
M04421	Otx2	Mouse:Photo_BC	3.29049e-105	2.37528	0.874	0.497	1.49981e-101
M10338	Pitx1	Mouse:Photo_BC	5.98669e-102	2.80463	0.892	0.498	2.72873e-98
M10021	Otx2	Mouse:Photo_BC	8.62261e-100	3.30442	0.906	0.498	3.93019e-96
M07055	Pitx1	Mouse:Photo_BC	5.30147e-99	2.03564	0.862	0.494	2.41641e-95
M07352	Crx	Mouse:Photo_BC	8.38327e-98	2.51114	0.884	0.496	3.82109e-94
M01719	Otx2	Mouse:Photo_BC	4.42079e-95	2.38993	0.885	0.496	2.01499e-91
M09680	Crx	Mouse:Photo_BC	1.16736e-85	3.0418	0.878	0.493	5.32083e-82
M08895	Pitx1,Pitx2,Pitx3	Mouse:Photo_BC	2.62578e-85	2.63355	0.896	0.497	1.19683e-81
M01343	Pitx3	Mouse:Photo_BC	5.16421e-84	2.3448	0.875	0.496	2.35385e-80
M07081	Crx	Mouse:Photo_BC	1.02414e-66	2.78046	0.878	0.493	4.66802e-63
M04420	Otx2	Mouse:Photo_BC	9.69658e-62	2.01119	0.818	0.488	4.4197e-58
M09888	Crx	Mouse:Photo_BC	2.76765e-54	2.66486	0.846	0.491	1.2615e-50
M10201	Crx	Mouse:Photo_BC	2.76765e-54	2.66486	0.846	0.491	1.2615e-50
M04418	Otx1	Mouse:Rod	0	6.95302	0.999	0.313	0
M04422	Otx1	Mouse:Rod	0	6.79738	0.999	0.313	0
M04420	Otx2	Mouse:Rod	0	6.75815	0.999	0.322	0
M01735	Pitx3	Mouse:Rod	0	5.23749	0.998	0.324	0
M08997	Gata3	Mouse:Rod	0	3.19658	0.98	0.307	0
M09888	Crx	Mouse:Rod	0	8.13438	1	0.328	0
M10201	Crx	Mouse:Rod	0	8.13438	1	0.328	0
M07392	Pitx3	Mouse:Rod	0	5.30126	0.998	0.33	0
M07081	Crx	Mouse:Rod	0	7.28597	0.999	0.333	0
M09680	Crx	Mouse:Rod	0	7.52028	1	0.334	0
M00127	Gata1	Mouse:Rod	0	3.57465	0.983	0.318	0
M07057	Pitx3	Mouse:Rod	0	3.4626	0.983	0.318	0
M00623	Crx,Rax	Mouse:Rod	0	4.4888	0.994	0.33	0
M01229	Gtf2ird1	Mouse:Rod	0	4.20541	0.992	0.329	0
M01343	Pitx3	Mouse:Rod	0	5.54738	0.998	0.336	0
M04428	Pitx1	Mouse:Rod	0	5.44508	0.999	0.338	0
M07352	Crx	Mouse:Rod	0	5.77028	0.999	0.338	0
M01719	Otx2	Mouse:Rod	0	5.49414	0.998	0.338	0
M04421	Otx2	Mouse:Rod	0	5.24223	0.998	0.338	0
M07055	Pitx1	Mouse:Rod	0	4.60447	0.995	0.335	0
M08895	Pitx1,Pitx2,Pitx3	Mouse:Rod	0	6.162	0.999	0.34	0
M10338	Pitx1	Mouse:Rod	0	5.91794	0.999	0.34	0
M04325	Gsc2	Mouse:Rod	0	5.95944	0.999	0.341	0
M10021	Otx2	Mouse:Rod	0	7.09845	0.999	0.341	0
M03838	Otx1	Mouse:Rod	0	3.70523	0.986	0.329	0
M04429	Pitx3	Mouse:Rod	0	5.87665	0.999	0.342	0
M04623	Otx2	Mouse:Rod	0	6.23204	0.999	0.342	0
M01436	Crx	Mouse:Rod	0	5.29958	0.998	0.342	0
M01484	Pitx1	Mouse:Rod	0	5.54307	0.999	0.343	0
M01712	Crx	Mouse:Rod	0	4.60419	0.996	0.34	0
M04423	Otx1	Mouse:Rod	0	4.24862	0.993	0.337	0
M01428	Gsc	Mouse:Rod	0	5.17405	0.998	0.343	0
M01826	Pitx1	Mouse:Rod	0	3.49804	0.984	0.329	0
M04305	Dmbx1	Mouse:Rod	0	5.25488	0.998	0.343	0
M04326	Gsc	Mouse:Rod	0	5.94812	0.999	0.344	0
M04505	Pitx1	Mouse:Rod	0	5.41113	0.998	0.343	0
M01877	Gata2	Mouse:Rod	0	2.96784	0.966	0.317	0
M01387	Otx2	Mouse:Rod	0	4.19797	0.989	0.349	0
M01366	Otx1	Mouse:Rod	0	3.95982	0.988	0.352	0
M00789	Gata1,Gata2,Gata3,Gata4,Gata5,Gata6	Mouse:Rod	0	2.47827	0.945	0.314	0
M03216	Gata6	Mouse:Rod	0	2.47827	0.945	0.314	0
M08765	Gata1	Mouse:Rod	0	2.47827	0.945	0.314	0
M08728	Eomes,Pitx1	Mouse:Rod	0	2.47084	0.945	0.32	0
M06790	Zbtb12	Mouse:Rod	0	2.46184	0.945	0.334	0
M09807	Gata2	Mouse:Rod	0	2.31197	0.932	0.322	0
M04713	Gata1	Mouse:Rod	0	2.25394	0.929	0.322	0
M08477	Foxj2,Pitx1	Mouse:Rod	0	2.58713	0.953	0.346	0
M10117	Zeb1	Mouse:Rod	0	2.57527	0.881	0.28	0
M10414	Zeb1	Mouse:Rod	0	2.57527	0.881	0.28	0
M06956	Prrxl1	Mouse:Rod	0	2.42464	0.939	0.34	0
M06932	Shox2	Mouse:Rod	0	2.4188	0.935	0.34	0
M06984	Rax	Mouse:Rod	0	2.34741	0.934	0.342	0
M09707	Rxra	Mouse:Rod	0	2.16854	0.911	0.32	0
M09672	Zeb1	Mouse:Rod	0	2.46217	0.872	0.282	0
M04419	Otx1	Mouse:Rod	0	2.18866	0.908	0.329	0
M06974	Prrx2	Mouse:Rod	0	2.19169	0.921	0.342	0
M06926	Arx	Mouse:Rod	0	2.23524	0.921	0.343	0
M10252	Gata6	Mouse:Rod	0	2.05374	0.91	0.332	0
M06994	Mixl1	Mouse:Rod	0	2.211	0.922	0.346	0
M06946	Prrx1	Mouse:Rod	0	2.19397	0.92	0.346	0
M04831	Zeb1	Mouse:Rod	0	2.42342	0.851	0.278	0
M07235	Zeb1	Mouse:Rod	0	2.40428	0.859	0.286	0
M09708	Rxrg	Mouse:Rod	0	2.05596	0.893	0.321	0
M06980	Mixl1	Mouse:Rod	0	2.14908	0.916	0.347	0
M07428	Six3	Mouse:Rod	0	2.15594	0.92	0.355	0
M07371	Zeb1	Mouse:Rod	0	2.29446	0.868	0.31	0
M08501	Hoxb2,Pitx1	Mouse:Rod	0	2.01962	0.907	0.358	0
M03582	Twist1	Mouse:Rod	0	2.16354	0.87	0.322	0
M04806	Tcf12	Mouse:Rod	0	2.15121	0.864	0.327	0
M08733	Hoxa3,Pitx1	Mouse:Rod	0	2.02727	0.889	0.362	0
M04085	Pou4f1	Mouse:RGC	0	11.9239	0.987	0.398	0
M04087	Pou4f3	Mouse:RGC	0	11.8342	0.985	0.407	0
M04077	Pou3f1	Mouse:RGC	0	8.41413	0.976	0.409	0
M04068	Pou1f1	Mouse:RGC	0	10.1581	0.984	0.419	0
M04086	Pou4f2	Mouse:RGC	0	9.19047	0.98	0.429	0
M04084	Pou3f4	Mouse:RGC	0	6.5339	0.967	0.429	0
M04081	Pou3f3	Mouse:RGC	0	6.60506	0.959	0.424	0
M03564	Satb1	Mouse:RGC	0	2.86294	0.989	0.455	0
M04078	Pou3f2	Mouse:RGC	0	6.18445	0.959	0.426	0
M00744	Pou1f1	Mouse:RGC	0	4.51475	0.968	0.441	0
M03559	Pou1f1	Mouse:RGC	0	4.34684	0.968	0.443	0
M00100	Cdx1	Mouse:RGC	0	3.02097	0.971	0.458	0
M01659	Cdx2,Cdx4	Mouse:RGC	0	2.85366	0.976	0.464	0
M02025	Mef2c	Mouse:RGC	0	3.24409	0.98	0.47	0
M03813	Pou3f3	Mouse:RGC	0	2.50073	0.969	0.461	0
M04337	Hnf1b	Mouse:RGC	0	4.28656	0.953	0.452	0
M06989	Zfp236	Mouse:RGC	0	2.90265	0.959	0.461	0
M00465	Pou6f1	Mouse:RGC	0	4.27173	0.951	0.455	0
M10342	Pou3f1	Mouse:RGC	0	4.49015	0.948	0.453	0
M04075	Pou2f3	Mouse:RGC	0	3.43755	0.947	0.453	0
M04338	Hnf1b	Mouse:RGC	0	3.54891	0.948	0.458	0
M07416	Cdx2,Cdx4	Mouse:RGC	0	2.42501	0.953	0.47	0
M01181	Nkx3-2	Mouse:RGC	0	3.02844	0.957	0.477	0
M03843	Pou4f1	Mouse:RGC	0	3.12606	0.932	0.456	0
M09946	Hnf1b	Mouse:RGC	0	3.34915	0.933	0.459	0
M10035	Pou3f2	Mouse:RGC	0	2.73316	0.94	0.467	0
M10259	Hnf1b	Mouse:RGC	0	3.24583	0.931	0.462	0
M05326	Sox3	Mouse:RGC	0	2.7439	0.933	0.465	0
M05297	Sox1	Mouse:RGC	0	2.85251	0.937	0.471	0
M10343	Pou3f2	Mouse:RGC	0	3.12139	0.919	0.455	0
M02080	Isl2	Mouse:RGC	2.90714e-307	2.49695	0.935	0.474	1.32507e-303
M04071	Pou2f1	Mouse:RGC	5.72335e-304	2.91742	0.931	0.453	2.6087e-300
M09952	Hoxa9	Mouse:RGC	6.16359e-302	2.27818	0.94	0.464	2.80937e-298
M10265	Hoxa9	Mouse:RGC	6.16359e-302	2.27818	0.94	0.464	2.80937e-298
M07452	Meis1	Mouse:RGC	3.01538e-301	2.38188	0.945	0.464	1.37441e-297
M04065	Pax6	Mouse:RGC	9.35056e-301	3.58872	0.989	0.452	4.26198e-297
M03090	Pou3f3	Mouse:RGC	5.37953e-299	3.27483	0.913	0.451	2.45199e-295
M04663	Foxm1	Mouse:RGC	4.88452e-295	2.06311	0.956	0.468	2.22636e-291
M01855	Ahr	Mouse:RGC	1.42139e-293	2.05835	0.957	0.459	6.47871e-290
M00097	Pax6	Mouse:RGC	4.54896e-293	2.67965	0.972	0.448	2.07342e-289
M01324	Pou3f3	Mouse:RGC	2.47378e-289	3.17535	0.9	0.453	1.12755e-285
M00041	Atf2,Jun	Mouse:RGC	3.40617e-289	2.3639	0.945	0.437	1.55253e-285
M00471	Tbp	Mouse:RGC	4.5184e-289	2.14438	0.948	0.475	2.05949e-285
M04082	Pou3f3	Mouse:RGC	3.0643e-288	3.01152	0.901	0.458	1.39671e-284
M00328	Pax8	Mouse:RGC	2.11498e-287	2.21596	0.957	0.457	9.64006e-284
M00338	Gdnf	Mouse:RGC	3.29623e-287	2.40023	0.955	0.433	1.50242e-283
M01861	Atf1	Mouse:RGC	4.29629e-287	2.42993	0.952	0.434	1.95825e-283
M04073	Pou2f2	Mouse:RGC	2.61985e-286	2.70204	0.912	0.454	1.19413e-282
M07248	Creb1	Mouse:RGC	5.74273e-285	2.37869	0.943	0.434	2.61754e-281
M00145	Pou3f2	Mouse:RGC	1.43394e-284	2.43461	0.92	0.466	6.53589e-281
M09600	Creb1	Mouse:RGC	5.05673e-278	2.37685	0.941	0.438	2.30486e-274
M04095	Rfx2	Mouse:RGC	5.43039e-278	3.6236	0.967	0.467	2.47517e-274
M00039	Creb1	Mouse:RGC	2.74282e-277	2.35403	0.937	0.433	1.25018e-273
M04103	Rfx2	Mouse:RGC	5.48873e-276	3.51727	0.968	0.466	2.50176e-272
M00916	Creb1,Crem	Mouse:RGC	6.6652e-276	2.32514	0.951	0.436	3.038e-272
M04097	Rfx3	Mouse:RGC	1.55661e-275	3.50694	0.971	0.466	7.09501e-272
M09592	Atf1	Mouse:RGC	2.1045e-272	2.26007	0.943	0.438	9.59231e-269
M04206	Creb3	Mouse:RGC	2.8267e-272	2.3546	0.943	0.435	1.28841e-268
M07034	Atf1	Mouse:RGC	1.71835e-269	2.23424	0.939	0.437	7.83225e-266
M00917	Creb1,Crem	Mouse:RGC	5.87636e-269	2.31479	0.935	0.44	2.67844e-265
M09887	Creb1	Mouse:RGC	1.04709e-268	2.27421	0.925	0.438	4.77265e-265
M10200	Creb1	Mouse:RGC	1.04709e-268	2.27421	0.925	0.438	4.77265e-265
M03544	Creb1	Mouse:RGC	2.38871e-268	2.27101	0.931	0.434	1.08877e-264
M04099	Rfx4	Mouse:RGC	5.02156e-268	3.34825	0.961	0.462	2.28883e-264
M00977	Ebf1,Ebf2	Mouse:RGC	4.33912e-267	2.51176	0.896	0.474	1.97777e-263
M00981	Atf1,Atf2,Atf3,Atf4,Atf5,Atf6,Atf7,Creb1,Crem,Gdnf	Mouse:RGC	5.46368e-267	2.30562	0.929	0.432	2.49035e-263
M02789	Rfx4	Mouse:RGC	1.45776e-265	2.8849	0.948	0.455	6.64447e-262
M04101	Rfx5	Mouse:RGC	1.1133e-262	3.35675	0.955	0.467	5.07443e-259
M00178	Creb1	Mouse:RGC	1.1371e-262	2.15272	0.925	0.439	5.18291e-259
M04105	Rfx3	Mouse:RGC	5.02895e-261	3.3586	0.964	0.471	2.2922e-257
M08404	Gsc2,Pou2f1	Mouse:RGC	1.06562e-260	2.64336	0.885	0.475	4.85712e-257
M08803	Crem	Mouse:RGC	5.22703e-257	2.0648	0.923	0.448	2.38248e-253
M00177	Creb1	Mouse:RGC	1.92765e-256	2.08213	0.931	0.439	8.78625e-253
M09866	Atf1	Mouse:RGC	6.46252e-256	2.0994	0.924	0.439	2.94561e-252
M10009	Nkx3-1	Mouse:RGC	4.74831e-253	2.21479	0.911	0.482	2.16428e-249
M10319	Nkx3-1	Mouse:RGC	4.74831e-253	2.21479	0.911	0.482	2.16428e-249
M02279	Creb1	Mouse:RGC	2.77099e-251	2.09001	0.921	0.438	1.26302e-247
M02738	Atf1	Mouse:RGC	3.68791e-251	2.26057	0.924	0.436	1.68095e-247
M09598	Ebf1	Mouse:RGC	3.71481e-251	2.798	0.888	0.473	1.69321e-247
M08763	Fos	Mouse:RGC	3.11758e-250	2.20528	0.931	0.436	1.42099e-246
M04724	Mxi1	Mouse:RGC	5.7764e-248	2.67869	0.952	0.466	2.63288e-244
M00017	Gdnf	Mouse:RGC	1.51559e-247	2.04108	0.92	0.443	6.90805e-244
M04102	Rfx5	Mouse:RGC	7.14729e-247	3.13694	0.945	0.469	3.25774e-243
M10028	Pax6	Mouse:RGC	2.37625e-246	2.28947	0.965	0.459	1.0831e-242
M10335	Pax6	Mouse:RGC	2.37625e-246	2.28947	0.965	0.459	1.0831e-242
M09651	Rfx2	Mouse:RGC	2.50926e-245	2.42072	0.948	0.478	1.14372e-241
M07410	Rfx2	Mouse:RGC	3.58333e-245	2.76282	0.956	0.467	1.63328e-241
M10198	Ebf1	Mouse:RGC	3.9134e-244	2.72345	0.881	0.471	1.78373e-240
M09885	Ebf1	Mouse:RGC	2.08888e-243	2.78738	0.88	0.474	9.52113e-240
M04227	Xbp1	Mouse:RGC	9.70218e-243	2.04476	0.913	0.44	4.42225e-239
M04627	Rfx1,Rfx2,Rfx3	Mouse:RGC	2.17104e-242	2.28232	0.927	0.469	9.89559e-239
M10355	Rfx2	Mouse:RGC	2.75658e-242	2.52117	0.941	0.474	1.25645e-238
M02790	Rfx7	Mouse:RGC	3.86923e-240	2.37994	0.932	0.457	1.7636e-236
M08915	Fosl2	Mouse:RGC	3.54989e-238	2.07554	0.928	0.438	1.61804e-234
M02788	Rfx3	Mouse:RGC	4.18116e-238	2.46128	0.916	0.456	1.90577e-234
M00281	Rfx1	Mouse:RGC	5.8743e-238	2.78997	0.939	0.474	2.67751e-234
M10010	Nkx3-2	Mouse:RGC	3.02358e-237	2.02359	0.881	0.48	1.37815e-233
M10320	Nkx3-2	Mouse:RGC	3.02358e-237	2.02359	0.881	0.48	1.37815e-233
M04092	Pou2f2	Mouse:RGC	3.77923e-237	2.09017	0.892	0.463	1.72257e-233
M04200	Batf3	Mouse:RGC	2.36118e-232	2.01958	0.903	0.438	1.07622e-228
M07122	Rfx1	Mouse:RGC	7.65567e-230	2.65667	0.929	0.472	3.48945e-226
M02772	Jdp2	Mouse:RGC	5.60377e-229	2.13664	0.905	0.435	2.5542e-225
M09002	Rfx2	Mouse:RGC	2.50191e-227	2.8073	0.937	0.467	1.14037e-223
M08924	Fosl2,Junb	Mouse:RGC	4.62057e-226	2.05844	0.909	0.437	2.10605e-222
M04064	Pax5	Mouse:RGC	1.02947e-225	2.10666	0.944	0.46	4.69233e-222
M09679	Ebf1	Mouse:RGC	2.79596e-224	2.52855	0.873	0.478	1.2744e-220
M07207	Ebf1	Mouse:RGC	5.31017e-220	2.38833	0.861	0.482	2.42038e-216
M10356	Rfx3	Mouse:RGC	2.68133e-219	2.48736	0.931	0.476	1.22215e-215
M04741	Srebf1	Mouse:RGC	3.61978e-219	2.57079	0.933	0.476	1.64989e-215
M04729	Ebf1	Mouse:RGC	2.70457e-218	2.22823	0.865	0.479	1.23274e-214
M03964	Ebf1	Mouse:RGC	4.70207e-217	2.38691	0.863	0.467	2.1432e-213
M04214	Jdp2	Mouse:RGC	9.58202e-215	2.01632	0.901	0.436	4.36749e-211
M10048	Rfx2	Mouse:RGC	5.86492e-213	2.53067	0.944	0.48	2.67323e-209
M02079	Isl2	Mouse:RGC	2.11378e-209	2.33529	0.867	0.478	9.63462e-206
M01483	Dbx1	Mouse:RGC	2.51474e-201	2.11066	0.84	0.473	1.14622e-197
M07305	Rfx1,Rfx2,Rfx3,Rfx4,Rfx5,Rfxap	Mouse:RGC	1.41588e-195	2.00472	0.901	0.476	6.45357e-192
M09832	Rfx1	Mouse:RGC	2.57805e-184	2.15257	0.907	0.472	1.17508e-180
M10101	Tgif1	Mouse:RGC	1.44063e-180	2.17829	0.861	0.398	6.56639e-177
M01432	Hoxd8	Mouse:RGC	2.10708e-142	2.01188	0.795	0.468	9.60409e-139
M10065	Sox10	Mouse:MG	0	4.67289	0.996	0.335	0
M10371	Sox10	Mouse:MG	0	4.67289	0.996	0.335	0
M10070	Sox9	Mouse:MG	0	4.902	0.998	0.341	0
M10374	Sox9	Mouse:MG	0	4.902	0.998	0.341	0
M08838	Sox9	Mouse:MG	0	4.49669	0.998	0.347	0
M09667	Tead4	Mouse:MG	0	3.46514	0.976	0.349	0
M07090	Fos	Mouse:MG	0	5.11675	0.947	0.321	0
M04144	Tead3	Mouse:MG	0	3.56819	0.973	0.349	0
M09923	Fosl2	Mouse:MG	0	5.24486	0.941	0.317	0
M08938	Fosl1,Jun	Mouse:MG	0	5.06243	0.937	0.314	0
M07104	Jund	Mouse:MG	0	5.14497	0.937	0.315	0
M10093	Tead4	Mouse:MG	0	3.34543	0.975	0.353	0
M08931	Fosl2,Jund	Mouse:MG	0	4.9506	0.935	0.315	0
M09617	Fos	Mouse:MG	0	5.21075	0.936	0.316	0
M08936	Fosb,Jun	Mouse:MG	0	4.80838	0.938	0.318	0
M08923	Fosl2,Junb	Mouse:MG	0	4.84598	0.94	0.321	0
M08940	Fosl2,Jun	Mouse:MG	0	5.00053	0.932	0.313	0
M08933	Fos,Jund	Mouse:MG	0	5.13738	0.933	0.315	0
M04145	Tead4	Mouse:MG	0	3.37054	0.974	0.356	0
M10274	Jund	Mouse:MG	0	5.07472	0.935	0.318	0
M09965	Jun	Mouse:MG	0	5.02814	0.935	0.319	0
M08922	Fosl1,Junb	Mouse:MG	0	4.84326	0.935	0.32	0
M09615	Fosl1	Mouse:MG	0	5.07444	0.935	0.32	0
M09964	Jund	Mouse:MG	0	4.92822	0.933	0.318	0
M10237	Fosl2	Mouse:MG	0	5.05318	0.932	0.317	0
M10273	Junb	Mouse:MG	0	5.05445	0.934	0.319	0
M07103	Junb	Mouse:MG	0	5.04868	0.93	0.316	0
M08942	Fos,Jun	Mouse:MG	0	4.92421	0.933	0.319	0
M09616	Fosl2	Mouse:MG	0	5.07613	0.93	0.316	0
M10395	Tead1	Mouse:MG	0	2.92382	0.975	0.362	0
M08920	Fosb,Junb	Mouse:MG	0	4.81138	0.932	0.32	0
M09614	Fosb	Mouse:MG	0	5.02197	0.931	0.319	0
M07092	Fosl2	Mouse:MG	0	4.99278	0.927	0.316	0
M09922	Fosl1	Mouse:MG	0	5.02524	0.93	0.319	0
M10092	Tead1,Tef	Mouse:MG	0	3.16899	0.97	0.359	0
M10236	Fosl1	Mouse:MG	0	5.02524	0.93	0.319	0
M07102	Jun	Mouse:MG	0	4.71015	0.934	0.324	0
M08925	Fos,Junb	Mouse:MG	0	4.83588	0.927	0.317	0
M09686	Fosl1	Mouse:MG	0	4.96532	0.929	0.319	0
M10235	Fosb	Mouse:MG	0	5.05089	0.929	0.319	0
M10238	Fos	Mouse:MG	0	5.00571	0.927	0.317	0
M09788	Tead2	Mouse:MG	0	3.33902	0.969	0.359	0
M09963	Junb	Mouse:MG	0	4.71244	0.933	0.324	0
M08934	Jund	Mouse:MG	0	4.68542	0.929	0.322	0
M08756	Bach1	Mouse:MG	0	4.6498	0.929	0.323	0
M07091	Fosl1	Mouse:MG	0	4.90486	0.926	0.321	0
M09921	Fosb	Mouse:MG	0	5.01644	0.922	0.319	0
M08929	Fosl1,Jund	Mouse:MG	0	4.55858	0.929	0.327	0
M10275	Jun	Mouse:MG	0	4.79309	0.922	0.32	0
M01305	Tead1,Tef	Mouse:MG	0	3.14124	0.966	0.364	0
M07340	Tead1	Mouse:MG	0	3.25082	0.971	0.369	0
M08914	Fosl2	Mouse:MG	0	4.63843	0.92	0.321	0
M09631	Junb	Mouse:MG	0	4.84189	0.922	0.323	0
M04141	Tead1	Mouse:MG	0	3.23095	0.959	0.361	0
M00926	Fos,Fosb,Fosl1,Fosl2,Jun,Junb,Jund	Mouse:MG	0	4.6446	0.92	0.324	0
M01267	Fosl1	Mouse:MG	0	4.6446	0.92	0.324	0
M02095	Fosl1	Mouse:MG	0	4.6446	0.92	0.324	0
M03866	Fos,Jun	Mouse:MG	0	4.6451	0.919	0.324	0
M08926	Junb	Mouse:MG	0	4.37297	0.923	0.328	0
M09924	Fos	Mouse:MG	0	4.6451	0.919	0.324	0
M04693	Fos	Mouse:MG	0	4.44468	0.928	0.335	0
M10396	Tead2	Mouse:MG	0	2.8024	0.961	0.368	0
M00495	Bach1	Mouse:MG	0	4.59944	0.92	0.328	0
M10397	Tead4	Mouse:MG	0	2.91388	0.96	0.369	0
M03870	Fosl2	Mouse:MG	0	4.23843	0.933	0.343	0
M10180	Atf3	Mouse:MG	0	4.58325	0.915	0.327	0
M08946	Fos	Mouse:MG	0	4.16953	0.917	0.331	0
M03803	Sox17	Mouse:MG	0	2.41375	0.981	0.396	0
M00704	Tead1	Mouse:MG	0	3.04783	0.984	0.4	0
M07480	Tead1,Tef	Mouse:MG	0	3.04783	0.984	0.4	0
M03823	Foxo1	Mouse:MG	0	2.1054	0.984	0.401	0
M03854	Sry	Mouse:MG	0	2.1054	0.984	0.401	0
M04213	Jdp2	Mouse:MG	0	4.16074	0.923	0.34	0
M02280	Fos,Jun	Mouse:MG	0	4.36422	0.911	0.329	0
M03551	Junb	Mouse:MG	0	4.03866	0.918	0.336	0
M01817	Tead1	Mouse:MG	0	2.8827	0.961	0.379	0
M03869	Fosl1	Mouse:MG	0	4.365	0.91	0.329	0
M03849	Sox4	Mouse:MG	0	2.28652	0.978	0.399	0
M07600	Fos	Mouse:MG	0	4.29033	0.913	0.334	0
M02876	Jdp2	Mouse:MG	0	4.26951	0.912	0.336	0
M08944	Jun,Junb	Mouse:MG	0	3.8913	0.913	0.338	0
M02096	Pdx1	Mouse:MG	0	4.03614	0.989	0.422	0
M00517	Fos,Fosb,Fosl1,Jun,Junb,Jund	Mouse:MG	0	4.09627	0.904	0.341	0
M03138	Sox10	Mouse:MG	0	2.36197	0.97	0.409	0
M07269	Sox9	Mouse:MG	0	2.46703	0.969	0.409	0
M07101	Jun	Mouse:MG	0	3.54463	0.979	0.424	0
M07307	Sox18	Mouse:MG	0	2.42977	0.946	0.392	0
M09819	Sox10	Mouse:MG	0	2.52077	0.955	0.402	0
M07105	Jund	Mouse:MG	0	3.37204	0.978	0.427	0
M07614	Sox4	Mouse:MG	0	2.34948	0.956	0.405	0
M00925	Fos,Fosb,Fosl1,Fosl2,Jun,Junb,Jund	Mouse:MG	0	3.72524	0.9	0.35	0
M07076	Batf,Jun	Mouse:MG	0	3.3753	0.912	0.366	0
M09804	Creb1	Mouse:MG	0	3.15668	0.972	0.427	0
M00490	Bach2	Mouse:MG	0	3.58792	0.899	0.355	0
M08941	Fosl2,Jun	Mouse:MG	0	3.06034	0.965	0.421	0
M09867	Atf2	Mouse:MG	0	3.25863	0.968	0.425	0
M10179	Atf2	Mouse:MG	0	3.25863	0.968	0.425	0
M04288	Barhl2	Mouse:MG	0	2.92238	0.972	0.43	0
M04681	Jund	Mouse:MG	0	3.01058	0.963	0.421	0
M01162	Nobox	Mouse:MG	0	3.89801	0.987	0.449	0
M02050	Nfix	Mouse:MG	0	3.73247	1	0.462	0
M03552	Jund	Mouse:MG	0	3.48072	0.899	0.361	0
M03815	Fos	Mouse:MG	0	3.48072	0.899	0.361	0
M04291	Barx1	Mouse:MG	0	3.2418	0.973	0.435	0
M08008	Nfia	Mouse:MG	0	2.78597	0.984	0.447	0
M04214	Jdp2	Mouse:MG	0	2.91966	0.958	0.423	0
M04294	Barhl1	Mouse:MG	0	2.98734	0.968	0.433	0
M07398	Pou4f2	Mouse:MG	0	3.12162	0.969	0.434	0
M08776	Jun	Mouse:MG	0	2.91555	0.957	0.422	0
M09815	Nfic	Mouse:MG	0	3.02832	0.988	0.453	0
M08932	Fosl2,Jund	Mouse:MG	0	2.90495	0.954	0.422	0
M08937	Fosb,Jun	Mouse:MG	0	2.83288	0.953	0.421	0
M08943	Fos,Jun	Mouse:MG	0	2.72614	0.958	0.427	0
M08945	Jun,Junb	Mouse:MG	0	2.69116	0.955	0.426	0
M10309	Nfic	Mouse:MG	0	2.66826	0.986	0.459	0
M00193	Nfia,Nfic	Mouse:MG	0	3.01172	0.988	0.464	0
M09976	Lhx2	Mouse:MG	0	3.00348	0.973	0.45	0
M07364	Nfia,Nfib,Nfic,Nfix	Mouse:MG	0	2.71463	0.981	0.463	0
M04328	Gsx2	Mouse:MG	0	2.86511	0.966	0.45	0
M08915	Fosl2	Mouse:MG	0	2.54464	0.942	0.426	0
M01393	Msx2	Mouse:MG	0	2.63405	0.961	0.446	0
M08763	Fos	Mouse:MG	0	2.5355	0.939	0.424	0
M08924	Fosl2,Junb	Mouse:MG	0	2.62234	0.94	0.425	0
M01470	Nkx6-3	Mouse:MG	0	2.66758	0.966	0.452	0
M04091	Pou6f2	Mouse:MG	0	2.95646	0.966	0.452	0
M01479	Pou6f1	Mouse:MG	0	2.95221	0.965	0.453	0
M02772	Jdp2	Mouse:MG	0	2.66467	0.935	0.423	0
M07411	Nfia	Mouse:MG	0	3.30852	0.993	0.482	0
M09640	Nfic	Mouse:MG	0	3.58472	0.995	0.484	0
M04058	Nfix	Mouse:MG	0	3.4912	0.992	0.483	0
M08024	Pou6f2	Mouse:MG	0	2.96403	0.965	0.456	0
M04057	Nfib	Mouse:MG	0	3.35166	0.988	0.481	0
M10002	Nfic	Mouse:MG	0	3.60039	0.998	0.491	0
M08921	Fosb,Junb	Mouse:MG	0	2.3828	0.94	0.433	0
M00806	Nfia,Nfic	Mouse:MG	0	2.56057	0.976	0.47	0
M08935	Jund	Mouse:MG	0	2.5587	0.935	0.43	0
M02271	Hoxa5	Mouse:MG	0	2.21651	0.941	0.437	0
M04292	Bsx	Mouse:MG	0	2.33242	0.946	0.442	0
M04405	Msx1	Mouse:MG	0	2.33242	0.946	0.442	0
M04407	Msx2	Mouse:MG	0	2.33242	0.946	0.442	0
M10337	Pdx1	Mouse:MG	0	2.67308	0.948	0.444	0
M01365	En1	Mouse:MG	0	2.55894	0.953	0.45	0
M01462	Pou6f1	Mouse:MG	0	2.65842	0.955	0.452	0
M08772	Hoxa6	Mouse:MG	0	2.42621	0.955	0.453	0
M08939	Fosl1,Jun	Mouse:MG	0	2.43482	0.933	0.431	0
M08947	Fos	Mouse:MG	0	2.4342	0.932	0.43	0
M04056	Nfia	Mouse:MG	0	3.24711	0.984	0.483	0
M01334	Nkx1-1	Mouse:MG	0	2.17807	0.942	0.442	0
M01349	Mnx1	Mouse:MG	0	2.40403	0.945	0.445	0
M01481	Hmx1	Mouse:MG	0	2.26108	0.942	0.442	0
M04335	Hmx3	Mouse:MG	0	2.16272	0.938	0.438	0
M01367	Lhx9	Mouse:MG	0	2.34741	0.951	0.452	0
M01446	Barhl2	Mouse:MG	0	2.08899	0.936	0.438	0
M04424	Pdx1	Mouse:MG	0	2.38906	0.945	0.448	0
M04200	Batf3	Mouse:MG	0	2.19944	0.922	0.427	0
M04210	Creb5	Mouse:MG	0	2.37235	0.926	0.431	0
M01360	Dbx2	Mouse:MG	0	2.20785	0.945	0.45	0
M01396	Hoxb7	Mouse:MG	0	2.43102	0.945	0.45	0
M01489	Nkx6-1	Mouse:MG	0	2.45052	0.948	0.453	0
M07047	Lhx2	Mouse:MG	0	2.63964	0.963	0.468	0
M08009	Nfix	Mouse:MG	0	2.23958	0.957	0.462	0
M04310	Dlx1	Mouse:MG	0	2.20019	0.94	0.446	0
M00640	Hoxa4	Mouse:MG	0	2.16081	0.94	0.449	0
M01413	Hmx3	Mouse:MG	0	2.05224	0.93	0.44	0
M01408	Pou4f3	Mouse:MG	0	2.11639	0.94	0.451	0
M01469	Nkx6-1	Mouse:MG	0	2.33499	0.944	0.455	0
M01475	Evx1	Mouse:MG	0	2.44797	0.948	0.459	0
M04206	Creb3	Mouse:MG	0	2.32989	0.913	0.425	0
M01234	Pdx1	Mouse:MG	0	2.35069	0.942	0.454	0
M04311	Dlx2	Mouse:MG	0	2.26508	0.931	0.444	0
M01340	Barx1	Mouse:MG	0	2.24741	0.938	0.451	0
M01013	Pdx1	Mouse:MG	0	2.18705	0.935	0.45	0
M02738	Atf1	Mouse:MG	0	2.25345	0.91	0.426	0
M01451	Hoxb8	Mouse:MG	0	2.03218	0.935	0.452	0
M01862	Atf2	Mouse:MG	0	2.16285	0.918	0.437	0
M01196	Nfic	Mouse:MG	0	2.38906	0.96	0.48	0
M01330	Hoxb3	Mouse:MG	0	2.39763	0.945	0.466	0
M08928	Fosb,Jund	Mouse:MG	0	2.24669	0.887	0.41	0
M04300	Dlx2	Mouse:MG	0	2.0412	0.924	0.449	0
M04302	Dlx4	Mouse:MG	0	2.0412	0.924	0.449	0
M08043	Dlx4	Mouse:MG	0	2.0412	0.924	0.449	0
M01394	Hoxa7	Mouse:MG	0	2.1108	0.93	0.456	0
M07246	Atf4	Mouse:MG	0	2.07391	0.913	0.439	0
M09592	Atf1	Mouse:MG	0	2.06401	0.902	0.428	0
M01332	Barhl1	Mouse:MG	0	2.12038	0.927	0.454	0
M01412	Msx1	Mouse:MG	0	2.32938	0.935	0.463	0
M01486	Dlx4	Mouse:MG	0	2.00162	0.923	0.455	0
M01439	Dlx1	Mouse:MG	0	2.19357	0.94	0.473	0
M00924	Fos,Fosb,Fosl1,Fosl2,Jun,Junb,Jund	Mouse:MG	0	2.44727	0.857	0.402	0
M09762	Nfib	Mouse:MG	0	2.00556	0.96	0.505	0
M04446	Vax1	Mouse:MG	0	2.0341	0.913	0.46	0
M04447	Vax2	Mouse:MG	0	2.0341	0.913	0.46	0
M09768	Bach2	Mouse:MG	0	2.36104	0.82	0.416	0
M10183	Bach2	Mouse:MG	0	2.12866	0.81	0.424	0
M04348	Hoxb3	Mouse:MG	2.31099e-306	2.64504	0.954	0.457	1.05335e-302
M07603	Dlx3	Mouse:MG	2.38183e-305	2.18174	0.935	0.457	1.08564e-301
M01391	Pax6	Mouse:MG	4.81624e-303	2.05633	0.932	0.463	2.19524e-299
M04614	Pdx1	Mouse:MG	6.76756e-303	2.14517	0.926	0.466	3.08466e-299
M02902	Sox14,Sox4	Mouse:MG	2.42188e-300	2.38869	0.951	0.403	1.1039e-296
M10282	Lhx2	Mouse:MG	5.06935e-300	2.81447	0.96	0.454	2.31061e-296
M02116	Sox10	Mouse:MG	1.07994e-298	2.34897	0.948	0.399	4.92238e-295
M07308	Sox2	Mouse:MG	8.49132e-298	2.12529	0.947	0.39	3.87034e-294
M01371	Gbx1	Mouse:MG	1.44816e-297	2.14842	0.927	0.445	6.6007e-294
M04399	Meox2	Mouse:MG	2.12803e-297	2.17638	0.936	0.468	9.69957e-294
M01354	Pou2f1	Mouse:MG	1.97683e-296	2.16672	0.938	0.458	9.01041e-293
M03847	Sox15	Mouse:MG	5.3441e-296	2.47555	0.946	0.397	2.43584e-292
M01336	Hoxa7	Mouse:MG	1.23827e-294	2.11563	0.922	0.463	5.64402e-291
M01233	Pdx1	Mouse:MG	6.29694e-291	2.33417	0.941	0.452	2.87015e-287
M03886	Sox2	Mouse:MG	7.23373e-286	2.0472	0.938	0.393	3.29714e-282
M01427	Nkx1-2	Mouse:MG	1.02315e-285	2.12404	0.932	0.458	4.66351e-282
M04403	Mnx1	Mouse:MG	2.21549e-284	2.20809	0.928	0.462	1.00982e-280
M01438	Pdx1	Mouse:MG	2.88981e-284	2.05932	0.922	0.477	1.31717e-280
M01016	Sox17	Mouse:MG	4.85463e-283	2.63202	0.978	0.375	2.21274e-279
M01590	Smad1	Mouse:MG	3.0098e-279	2.02022	0.93	0.396	1.37187e-275
M10067	Sox2	Mouse:MG	8.46265e-279	2.88885	0.972	0.386	3.85728e-275
M07127	Sox3	Mouse:MG	1.13534e-278	2.79127	0.968	0.386	5.17487e-275
M04349	Hoxb5	Mouse:MG	2.13481e-278	2.34411	0.937	0.463	9.73045e-275
M08912	En1	Mouse:MG	2.00825e-277	2.21285	0.922	0.459	9.15358e-274
M09709	Sox3	Mouse:MG	3.49683e-277	3.15364	0.969	0.394	1.59385e-273
M04324	Gbx2	Mouse:MG	4.53494e-277	2.25267	0.944	0.455	2.06703e-273
M01461	Emx2	Mouse:MG	3.03961e-276	2.34392	0.939	0.458	1.38545e-272
M01284	Sox9	Mouse:MG	7.81905e-276	2.42339	0.952	0.409	3.56392e-272
M04327	Gsx1	Mouse:MG	4.79251e-274	2.71093	0.956	0.454	2.18442e-270
M08899	Hbp1,Sox1,Sox10,Sox11,Sox13,Sox15,Sox17,Sox18,Sox2,Sox21,Sox3,Sox30,Sox4,Sox5,Sox6,Sox7,Sox8,Sox9,Sry	Mouse:MG	1.11398e-272	2.96872	0.961	0.384	5.07754e-269
M07425	Msx2	Mouse:MG	8.9742e-272	2.53819	0.956	0.469	4.09044e-268
M02288	Plac8	Mouse:MG	8.9742e-272	2.53819	0.956	0.469	4.09044e-268
M10068	Sox3	Mouse:MG	1.453e-271	3.28502	0.974	0.395	6.62277e-268
M10069	Sox4	Mouse:MG	4.12854e-268	2.57222	0.956	0.391	1.88179e-264
M10373	Sox4	Mouse:MG	4.12854e-268	2.57222	0.956	0.391	1.88179e-264
M09787	Sox13	Mouse:MG	1.29346e-266	2.69563	0.946	0.375	5.89557e-263
M01327	Vax2	Mouse:MG	5.60052e-265	2.39055	0.941	0.46	2.55272e-261
M08949	Lhx6	Mouse:MG	1.37619e-260	2.03942	0.918	0.47	6.27266e-257
M01424	Hoxb4	Mouse:MG	1.79537e-258	2.00572	0.925	0.464	8.18329e-255
M01444	Phox2a	Mouse:MG	6.47406e-258	2.28149	0.923	0.454	2.95088e-254
M04415	Nkx6-1	Mouse:MG	1.49437e-255	2.0908	0.93	0.466	6.81136e-252
M04416	Nkx6-2	Mouse:MG	1.49437e-255	2.0908	0.93	0.466	6.81136e-252
M01308	Sox4	Mouse:MG	2.9544e-249	2.65054	0.946	0.387	1.34661e-245
M01455	En2	Mouse:MG	1.02981e-248	2.04449	0.916	0.457	4.69387e-245
M10283	Lhx3	Mouse:MG	8.78041e-242	2.10787	0.935	0.463	4.00211e-238
M02795	Sox11	Mouse:MG	9.33566e-242	2.22814	0.93	0.384	4.2552e-238
M08970	Sox10	Mouse:MG	1.83738e-241	2.1552	0.922	0.393	8.37477e-238
M01382	Gbx2	Mouse:MG	2.71748e-236	2.11967	0.92	0.46	1.23863e-232
M04344	Hoxa2	Mouse:MG	2.98341e-234	2.02483	0.917	0.464	1.35984e-230
M07128	Sox6	Mouse:MG	2.54127e-232	2.84782	0.95	0.38	1.15831e-228
M04322	Gbx1	Mouse:MG	3.62447e-231	2.15345	0.927	0.459	1.65204e-227
M01441	Nobox	Mouse:MG	6.24742e-229	2.12084	0.92	0.457	2.84757e-225
M07385	Lhx2	Mouse:MG	1.16101e-224	2.03191	0.914	0.467	5.29187e-221
M07225	Sox2	Mouse:MG	3.9364e-215	2.46194	0.932	0.396	1.79421e-211
M04004	Sox9	Mouse:MG	2.07189e-193	2.13692	0.888	0.376	9.44367e-190
M04441	Shox2	Mouse:MG	2.87768e-189	2.11002	0.916	0.464	1.31165e-185
M08973	Sox2	Mouse:MG	1.073e-184	2.02018	0.894	0.39	4.89073e-181
M03934	Zbtb18	Mouse:BC	0	5.57637	0.996	0.326	0
M09790	Twist1	Mouse:BC	0	5.42433	0.998	0.363	0
M01808	Mycn	Mouse:BC	0	4.19092	0.991	0.371	0
M04195	Tcf21	Mouse:BC	0	3.62789	0.98	0.37	0
Atoh7-Custom		Mouse:BC	0	3.83995	0.982	0.372	0
M09997	Neurod1	Mouse:BC	0	5.75652	0.986	0.386	0
M10304	Neurod1	Mouse:BC	0	5.75652	0.986	0.386	0
M10315	Neurog2	Mouse:BC	0	5.09244	0.982	0.384	0
M09998	Neurod2	Mouse:BC	0	4.92985	0.979	0.385	0
M09870	Atoh1	Mouse:BC	0	4.81621	0.973	0.38	0
M10182	Atoh1	Mouse:BC	0	4.81621	0.973	0.38	0
M00066	Tal1,Tcf3	Mouse:BC	0	5.24548	0.992	0.401	0
M09674	Atoh1	Mouse:BC	0	4.68839	0.97	0.379	0
M10305	Neurod2	Mouse:BC	0	4.7007	0.973	0.39	0
M00070	Tal1,Tcf4	Mouse:BC	0	4.79186	0.989	0.407	0
M02927	Tcf3	Mouse:BC	0	4.54242	0.985	0.406	0
M09701	Neurod1	Mouse:BC	0	4.80728	0.977	0.398	0
M09703	Olig2	Mouse:BC	0	3.25524	0.956	0.379	0
M00176	Tfap4	Mouse:BC	0	2.83557	0.966	0.39	0
M00065	Tal1,Tcf3	Mouse:BC	0	4.83966	0.991	0.416	0
M09875	Bhlha15	Mouse:BC	0	2.95305	0.949	0.377	0
M10188	Bhlha15	Mouse:BC	0	2.95305	0.949	0.377	0
M09776	Neurod1	Mouse:BC	0	5.11426	0.978	0.407	0
M10019	Olig2	Mouse:BC	0	3.08276	0.945	0.374	0
M10329	Olig2	Mouse:BC	0	3.08276	0.945	0.374	0
M00993	Tal1	Mouse:BC	0	3.75174	0.973	0.403	0
M07075	Atoh1	Mouse:BC	0	4.01623	0.964	0.395	0
M07609	Neurog2	Mouse:BC	0	2.99758	0.942	0.373	0
M10097	Tfap4	Mouse:BC	0	2.67411	0.953	0.386	0
M03804	Tal1	Mouse:BC	0	4.36193	0.97	0.405	0
M09951	Tcf12	Mouse:BC	0	2.52575	0.953	0.397	0
M07113	Myog	Mouse:BC	0	2.61843	0.931	0.379	0
M04192	Tfap4	Mouse:BC	0	2.3832	0.943	0.391	0
M07134	Tcf12	Mouse:BC	0	2.57778	0.928	0.379	0
M10296	Msgn1	Mouse:BC	0	2.67052	0.929	0.383	0
M09962	Tcf4	Mouse:BC	0	2.38547	0.934	0.39	0
M04570	Msc	Mouse:BC	0	2.35376	0.938	0.394	0
M10351	Ptf1a	Mouse:BC	0	2.35472	0.912	0.375	0
M00927	Tfap4	Mouse:BC	0	2.38664	0.919	0.384	0
M01716	Atoh1,Tcf3	Mouse:BC	0	2.30052	0.929	0.397	0
M01735	Pitx3	Mouse:BC	0	3.25261	0.986	0.455	0
M01712	Crx	Mouse:BC	0	3.7528	0.994	0.466	0
M10338	Pitx1	Mouse:BC	0	3.94833	0.99	0.467	0
M07422	Ascl1	Mouse:BC	0	2.28063	0.93	0.409	0
M00175	Tfap4	Mouse:BC	0	2.17708	0.921	0.4	0
M09977	Lyl1	Mouse:BC	0	2.21592	0.914	0.393	0
M10285	Lyl1	Mouse:BC	0	2.21592	0.914	0.393	0
M09691	Tcf12	Mouse:BC	0	2.07574	0.903	0.383	0
M07055	Pitx1	Mouse:BC	0	3.0474	0.981	0.463	0
M01484	Pitx1	Mouse:BC	0	3.74401	0.987	0.47	0
M01343	Pitx3	Mouse:BC	0	3.41285	0.981	0.465	0
M01387	Otx2	Mouse:BC	0	3.48154	0.987	0.472	0
M01436	Crx	Mouse:BC	0	3.39978	0.984	0.469	0
M08895	Pitx1,Pitx2,Pitx3	Mouse:BC	0	3.71776	0.982	0.468	0
M04428	Pitx1	Mouse:BC	0	3.49717	0.98	0.467	0
M01366	Otx1	Mouse:BC	0	3.57803	0.986	0.474	0
M01428	Gsc	Mouse:BC	0	3.49045	0.981	0.47	0
M04159	Ascl2	Mouse:BC	0	2.02616	0.893	0.384	0
M07112	Myod1	Mouse:BC	0	2.02927	0.898	0.389	0
M01229	Gtf2ird1	Mouse:BC	0	2.58754	0.967	0.458	0
M04421	Otx2	Mouse:BC	0	3.31716	0.976	0.467	0
M04423	Otx1	Mouse:BC	0	2.73242	0.974	0.465	0
M04305	Dmbx1	Mouse:BC	0	3.3035	0.978	0.471	0
M00002	Tcf3	Mouse:BC	0	2.05289	0.927	0.422	0
M01877	Gata2	Mouse:BC	0	2.13061	0.947	0.444	0
M04183	Neurog2	Mouse:BC	0	2.04095	0.908	0.407	0
M03838	Otx1	Mouse:BC	0	2.13793	0.953	0.458	0
M00698	Tcf12	Mouse:BC	0	2.00494	0.895	0.405	0
M08477	Foxj2,Pitx1	Mouse:BC	0	2.15723	0.952	0.463	0
M00127	Gata1	Mouse:BC	0	2.07985	0.937	0.45	0
M01826	Pitx1	Mouse:BC	0	2.01028	0.934	0.46	0
M07057	Pitx3	Mouse:BC	0	2.04391	0.925	0.452	0
M07392	Pitx3	Mouse:BC	9.575e-297	2.91844	0.975	0.461	4.36429e-293
M00623	Crx,Rax	Mouse:BC	1.49439e-294	2.45549	0.961	0.461	6.81143e-291
M04326	Gsc	Mouse:BC	6.24231e-293	3.58222	0.984	0.471	2.84525e-289
M04505	Pitx1	Mouse:BC	8.09862e-287	3.14242	0.975	0.471	3.69135e-283
M01719	Otx2	Mouse:BC	1.53868e-286	3.14765	0.979	0.466	7.01331e-283
M04429	Pitx3	Mouse:BC	8.34647e-279	3.41642	0.978	0.47	3.80432e-275
M10021	Otx2	Mouse:BC	7.19434e-276	4.1969	0.988	0.468	3.27918e-272
M04325	Gsc2	Mouse:BC	3.45642e-272	3.41804	0.978	0.47	1.57544e-268
M04623	Otx2	Mouse:BC	3.26217e-262	3.55445	0.984	0.47	1.4869e-258
M07352	Crx	Mouse:BC	1.31294e-250	3.12102	0.972	0.467	5.98436e-247
M07081	Crx	Mouse:BC	2.3191e-233	3.93336	0.985	0.462	1.05705e-229
M09680	Crx	Mouse:BC	5.52704e-171	3.59929	0.98	0.463	2.51922e-167
M09888	Crx	Mouse:BC	2.99234e-158	3.70415	0.984	0.459	1.36391e-154
M10201	Crx	Mouse:BC	2.99234e-158	3.70415	0.984	0.459	1.36391e-154
M04418	Otx1	Mouse:BC	4.00236e-148	2.64111	0.959	0.449	1.82427e-144
M04422	Otx1	Mouse:BC	4.91147e-126	2.39746	0.94	0.451	2.23865e-122
M04420	Otx2	Mouse:BC	1.46937e-124	2.45774	0.952	0.457	6.69737e-121
