# Supplementary material for: Heterochronic transcription factor expression drives cone-dominant retina development in 13-lined ground squirrels
Source: bioRxiv preprint, doi:10.1101/2025.04.25.650540, version 6 (2026-01-13)
Supplement: Supplemental Table 6 [file 650540_file21.xlsx]

## Sheet: Cone-like precursors vs. Rods
Cone-like Precursors/Rod gene expression
Experiment 1																								Experiment 2
Empty						POU2F1						ZIC3						ZIC3+POU2f1						Empty						POU2F1						ONECUT1						ZIC3+POU2F1
	p_val	avg_log2FC	pct.1	pct.2	p_val_adj		p_val	avg_log2FC	pct.1	pct.2	p_val_adj		p_val	avg_log2FC	pct.1	pct.2	p_val_adj		p_val	avg_log2FC	pct.1	pct.2	p_val_adj		p_val	avg_log2FC	pct.1	pct.2	p_val_adj		p_val	avg_log2FC	pct.1	pct.2	p_val_adj		p_val	avg_log2FC	pct.1	pct.2	p_val_adj		p_val	avg_log2FC	pct.1	pct.2	p_val_adj
pcagiggfp	1.4044e-42	4.05206	1	0.389	2.68661e-38	hPou2f1	2.38144e-68	3.35896	0.937	0.105	4.55569e-64	pcagiggfp	2.20684e-42	4.35107	1	0.306	4.22168e-38	hPou2f1	4.02071e-158	3.75252	0.952	0.089	7.69162e-154	pcagiggfp	9.58274e-33	2.68537	1	0.997	1.93811e-28	pcagiggfp	7.41079e-173	2.55623	0.992	0.942	1.49883e-168	hOnecut1	7.91476e-127	1.23423	0.477	0.031	1.60076e-122	Pdc	2.68541e-39	-1.07023	1	1	5.43125e-35
Olfr1535	4.80994e-10	0.0534393	0.038	0	9.20141e-06	pcagiggfp	3.19953e-55	4.49256	1	0.32	6.12071e-51	Cplx1	3.50331e-39	0.608209	0.333	0.01	6.70184e-35	pcagiggfp	1.3822e-113	4.0851	0.988	0.293	2.64416e-109	Kcns1	4.16026e-10	0.0430687	0.03	0	8.41412e-06	Pdc	8.28388e-173	-0.818358	1	1	1.67541e-168	pcagiggfp	2.8017e-102	3.03459	1	0.999	5.66643e-98	Rp1	1.86757e-31	-1.11346	0.991	1	3.77716e-27
Gm20324	4.80994e-10	0.0534393	0.038	0	9.20141e-06	Gnb1	6.5086e-23	-1.19175	0.759	0.991	1.2451e-18	hZic3	8.3941e-35	0.40597	0.271	0.006	1.60579e-30	Cplx1	4.44519e-99	0.884389	0.482	0.007	8.50365e-95	St18	1.10959e-09	0.336076	0.202	0.051	2.24414e-05	hPou2f1	7.851e-128	1.77344	0.845	0.514	1.58786e-123	Cit	3.25368e-86	0.708839	0.458	0.056	6.58057e-82	Nr2e3	1.009e-27	-0.987266	0.991	1	2.0407e-23
Gm41442	4.80994e-10	0.0534393	0.038	0	9.20141e-06	Aipl1	1.38954e-21	-1.15994	0.62	0.956	2.65819e-17	Mafa	1.45563e-34	0.788259	0.208	0.001	2.78462e-30	hZic3	8.44213e-67	0.70946	0.349	0.008	1.61498e-62	Mir124a-1hg	3.42573e-09	-0.42849	0.98	1	6.92853e-05	Rp1	1.95421e-126	-0.788207	1	0.999	3.95238e-122	Mir124a-1hg	5.5934e-79	-1.18841	0.817	0.987	1.13126e-74	Cnga1	1.09509e-25	-1.08591	0.902	0.996	2.21482e-21
Gm10309	4.80994e-10	0.0534393	0.038	0	9.20141e-06	Pdc	1.44906e-21	-1.0509	0.911	1	2.77205e-17	Mdga1	8.87187e-26	0.430613	0.292	0.016	1.69719e-21	Rom1	1.44746e-65	-1.50137	0.831	1	2.769e-61	mt-Nd4	5.94659e-09	0.455497	1	1	0.00012027	Rom1	7.71956e-102	-0.60239	0.999	1	1.56128e-97	Rp1	2.27588e-69	-1.00875	0.912	0.988	4.60296e-65	Ebpl	2.21476e-25	-0.916173	1	1	4.47936e-21
Gm43653	1.12079e-08	0.0766277	0.057	0.002	0.000214407	Cox6c	1.53769e-21	-0.773609	1	1	2.94161e-17	Lrrc38	5.3044e-22	0.267571	0.167	0.004	1.01473e-17	Cox6c	4.58901e-65	-1.10436	1	1	8.77877e-61	Car10	8.87097e-09	0.480391	0.242	0.076	0.000179415	Cnga1	8.85626e-98	-0.795936	0.963	0.994	1.79118e-93	Rpgrip1	2.28759e-69	-1.21746	0.595	0.928	4.62665e-65	Rom1	8.1987e-25	-0.893819	1	1	1.65819e-20
Gm17949	1.12079e-08	0.0766277	0.057	0.002	0.000214407	Sphkap	4.49861e-21	0.808746	0.253	0.009	8.60585e-17	Tnc	2.02102e-16	0.168107	0.104	0.001	3.86621e-12	Stmn1	5.52891e-65	2.12776	0.837	0.298	1.05768e-60	Samd13	1.40506e-08	0.0688429	0.04	0.002	0.000284174	Ebpl	9.38838e-94	-0.611908	1	1	1.8988e-89	Sag	7.33507e-63	-0.609602	1	1	1.48352e-58	Sag	1.9521e-22	-0.871882	1	1	3.94813e-18
Armcx6	3.00393e-07	0.0752263	0.057	0.003	0.00574651	Basp1	9.09543e-21	1.05974	0.544	0.119	1.73996e-16	Ppp1r1b	2.02102e-16	0.168107	0.104	0.001	3.86621e-12	Pdc	2.13213e-64	-1.60923	0.934	1	4.07877e-60	Kcnma1	9.69109e-08	0.645697	0.273	0.103	0.00196002	Nr2e3	6.56555e-93	-0.623355	0.995	0.999	1.32788e-88	Sdk2	5.54985e-62	0.378825	0.24	0.014	1.12246e-57	pcagiggfp	8.83572e-22	1.94136	0.991	0.901	1.78703e-17
C630043F03Rik	7.09041e-07	0.103565	0.038	0.001	0.013564	Kcnab1	1.07424e-19	0.624004	0.405	0.058	2.05503e-15	Mical2	2.30821e-15	0.263951	0.146	0.006	4.4156e-11	Sphkap	3.42672e-64	1.01564	0.373	0.016	6.55531e-60	Nr2e3	1.13044e-07	-0.301804	1	1	0.00228632	Gnb1	3.40289e-89	-0.619243	0.995	1	6.88235e-85	Kif5c	2.81337e-59	0.617854	0.385	0.063	5.69005e-55	Pde6b	2.18811e-20	-1.01609	0.893	0.989	4.42545e-16
Ttll11	7.27327e-07	0.0520352	0.038	0.001	0.0139138	Pde6b	1.23669e-19	-1.06563	0.722	1	2.36578e-15	Zfp423	1.02798e-14	0.283199	0.167	0.01	1.96652e-10	Cnga1	4.88197e-64	-1.94937	0.277	0.952	9.3392e-60	4930592C13Rik	2.71187e-07	0.052667	0.04	0.002	0.00548476	Rraga	2.17194e-70	-0.64977	0.973	0.99	4.39275e-66	Cux2	3.46811e-59	0.416493	0.275	0.025	7.01426e-55	Neurod1	1.64089e-19	-0.647243	1	1	3.31869e-15
Ptpru	7.27327e-07	0.0520352	0.038	0.001	0.0139138	Atp5mpl	1.83388e-19	-0.869066	0.987	1	3.50821e-15	Insm2	5.32962e-13	0.327696	0.167	0.013	1.01956e-08	Aipl1	1.11893e-60	-1.58361	0.361	0.942	2.14051e-56	mt-Co1	3.29652e-07	0.423462	1	1	0.00666721	Prph2	4.99023e-68	-0.487876	1	1	1.00927e-63	Tulp1	1.56121e-53	-0.811424	0.878	0.97	3.15754e-49	Prph2	3.08329e-19	-0.776136	1	1	6.23596e-15
Aatk	7.27327e-07	0.0520352	0.038	0.001	0.0139138	Tmem215	4.94068e-19	0.930726	0.468	0.093	9.45153e-15	Gm5741	6.95597e-13	0.168107	0.083	0.001	1.33068e-08	Tmem215	1.03311e-57	1.34242	0.572	0.097	1.97634e-53	Adora1	3.4167e-07	0.0288549	0.02	0	0.00691027	Neurod1	2.98386e-62	-0.391443	1	1	6.03485e-58	Wscd2	4.468e-53	0.34559	0.191	0.009	9.03654e-49	Cdkn1a	6.33616e-19	0.86315	0.339	0.059	1.28149e-14
Apom	7.27327e-07	0.0520352	0.038	0.001	0.0139138	Cnga1	5.77833e-19	-1.19279	0.468	0.949	1.10539e-14	Cnga1	1.72941e-12	-1.06112	0.688	0.976	3.30837e-08	Plpp3	1.75509e-57	1.03059	0.452	0.046	3.35749e-53	Plbd1	3.4167e-07	0.0288549	0.02	0	0.00691027	Nrl	3.58527e-62	-0.567683	0.984	0.996	7.25121e-58	Mir100hg	6.74183e-51	0.745525	0.252	0.027	1.36354e-46	Gnb1	8.27371e-19	-0.688788	0.991	1	1.67336e-14
Arhgap11a	4.75073e-06	0.0909898	0.075	0.008	0.0908814	Ttc28	3.76583e-18	1.02981	0.557	0.145	7.20404e-14	Rbfox3	4.32074e-12	0.247771	0.167	0.014	8.26558e-08	Prph2	4.23137e-56	-1.21968	0.886	0.999	8.09461e-52	Olfr472	3.4167e-07	0.0288549	0.02	0	0.00691027	Mir124-2hg	4.02599e-59	-0.603784	0.967	0.995	8.14256e-55	Pdc	3.26848e-50	-0.501361	1	1	6.6105e-46	Mir124a-1hg	3.12951e-18	-0.69119	1	1	6.32942e-14
Adcy2	6.29485e-06	0.109141	0.094	0.013	0.120421	Dnm3	5.35234e-17	-1.2	0.367	0.836	1.0239e-12	Abi3	1.00465e-10	0.192763	0.083	0.003	1.92189e-06	Rab27b	7.42466e-56	0.674213	0.277	0.004	1.42034e-51	Gm15642	3.4167e-07	0.0288549	0.02	0	0.00691027	Slc4a7	1.79059e-56	-0.56848	0.901	0.965	3.62147e-52	mt-Co3	4.37735e-49	1.11434	1	0.999	8.8532e-45	H2afz	1.78294e-16	0.690524	1	0.993	3.60601e-12
2610203C22Rik	1.09411e-05	0.026967	0.019	0	0.209304	Nrn1l	1.17142e-16	0.805418	0.228	0.014	2.24092e-12	Grin2c	1.00469e-10	0.269384	0.083	0.003	1.92197e-06	Basp1	1.84103e-54	1.26105	0.669	0.157	3.5219e-50	Il1a	3.41672e-07	0.0430687	0.02	0	0.00691032	Mir124a-1hg	1.33959e-54	-0.418344	1	0.999	2.70932e-50	mt-Atp6	6.68242e-49	1.12453	1	1	1.35152e-44	Abhd14b	4.28906e-16	-0.787141	0.795	0.935	8.67463e-12
Gm37062	1.09411e-05	0.026967	0.019	0	0.209304	Rom1	1.80093e-16	-0.862373	0.886	1	3.44518e-12	Gng13	1.0329e-10	0.218758	0.083	0.003	1.97594e-06	Osbpl6	7.63666e-54	0.53752	0.355	0.022	1.46089e-49	Cntnap5a	4.39654e-07	0.180701	0.091	0.016	0.008892	Pdlim7	5.91736e-54	0.727516	0.676	0.387	1.19679e-49	mt-Co2	6.59871e-48	1.11776	1	0.998	1.33459e-43	Tagln2	1.26649e-15	0.608173	0.384	0.099	2.56148e-11
Gm973	1.09411e-05	0.026967	0.019	0	0.209304	Dpysl3	5.81341e-16	-0.831146	0.722	0.972	1.1121e-11	Aldoa	3.0442e-10	-0.793372	1	1	5.82356e-06	Zmiz1	9.53414e-53	0.870768	0.614	0.118	1.82388e-48	mt-Co3	6.70482e-07	0.398048	1	1	0.0135605	Cadm2	7.48314e-54	-0.477668	0.983	0.998	1.51347e-49	Nr2e3	1.30393e-47	-0.709524	0.954	0.998	2.63719e-43	2025-03-01	2.2695e-15	-0.720566	0.875	0.968	4.59007e-11
Gpr161	1.09411e-05	0.026967	0.019	0	0.209304	Gabrb3	5.93893e-16	0.885658	0.595	0.189	1.13612e-11	Shisal1	7.44443e-10	0.261746	0.188	0.024	1.42412e-05	Nrn1l	1.82785e-52	0.921321	0.295	0.01	3.49668e-48	mt-Cytb	6.92355e-07	0.390904	1	1	0.0140029	Pde6b	8.64471e-52	-0.554496	0.956	0.993	1.74839e-47	Neurod1	8.24384e-47	-0.699335	0.969	0.998	1.66732e-42	hPou2f1	4.88378e-15	1.69268	0.938	0.733	9.87744e-11
Eng	1.09411e-05	0.026967	0.019	0	0.209304	Tle4	9.78894e-16	0.723441	0.544	0.152	1.87262e-11	En2	7.63327e-10	0.24956	0.146	0.014	1.46024e-05	Pde6b	7.21724e-51	-1.39544	0.602	0.987	1.38066e-46	Dmd	6.9871e-07	-0.354684	1	0.999	0.0141314	Rorb	5.68142e-50	-0.410778	0.989	0.999	1.14907e-45	Epb41l4b	5.76329e-45	0.329332	0.221	0.022	1.16563e-40	Rho	1.30176e-14	-1.26463	0.857	0.97	2.63281e-10
Phf19	1.09411e-05	0.026967	0.019	0	0.209304	Hist2h2be	3.18343e-15	0.434381	0.241	0.021	6.08991e-11	Aipl1	2.12136e-09	-0.778734	0.75	0.967	4.05816e-05	Psd3	1.02266e-50	0.819933	0.41	0.043	1.95635e-46	Prrg3	7.45356e-07	0.100944	0.051	0.005	0.0150748	Dmd	1.05444e-47	-0.431858	0.984	0.995	2.13261e-43	mt-Nd4	9.5782e-45	1.02016	1	0.987	1.93719e-40	Cngb1	4.97778e-14	-0.721796	0.795	0.928	1.00676e-09
Fsip1	1.09411e-05	0.026967	0.019	0	0.209304	Cngb1	4.5313e-15	-0.895039	0.671	0.935	8.66839e-11	Man1c1	2.16997e-09	0.113659	0.062	0.001	4.15115e-05	Gnb1	3.61097e-49	-1.30126	0.729	0.997	6.90778e-45	mt-Co2	9.93117e-07	0.398524	1	1	0.0200858	Sag	4.27126e-46	-0.434375	1	1	8.63862e-42	Dst	2.10276e-43	0.505724	0.397	0.091	4.25284e-39	Gngt1	1.61647e-13	-0.665931	1	1	3.2693e-09
A730036I17Rik	1.09411e-05	0.026967	0.019	0	0.209304	Cplx2	5.24865e-15	0.889809	0.987	0.864	1.00407e-10	Ripply3	4.07082e-09	0.132083	0.083	0.004	7.78747e-05	Pde6g	8.1886e-49	-1.2726	0.849	0.997	1.56648e-44	Setd7	1.06485e-06	0.179516	0.162	0.046	0.0215366	Rdh12	1.7221e-45	-0.60539	0.693	0.835	3.48295e-41	mt-Nd2	7.59138e-43	1.04664	0.996	0.989	1.53536e-38	Tulp1	3.67877e-13	-0.537244	0.991	1	7.44031e-09
Matn4	1.09411e-05	0.026967	0.019	0	0.209304	Rab27b	1.03068e-14	0.344354	0.177	0.007	1.97169e-10	Limd2	4.51574e-09	0.336994	0.208	0.033	8.63862e-05	Rp1	7.40346e-48	-1.25279	0.789	1	1.41628e-43	mt-Atp6	1.68036e-06	0.397908	1	1	0.0339853	Gngt1	5.65134e-45	-0.450584	0.998	1	1.14298e-40	Gm26797	1.3729e-41	0.238188	0.145	0.006	2.77669e-37	Unc119	2.23991e-12	-0.455823	1	1	4.53023e-08
Pdzk1	1.09411e-05	0.026967	0.019	0	0.209304	Nrl	1.17667e-14	-0.809656	0.734	1	2.25098e-10	Atp5mpl	6.26366e-09	-0.560271	1	1	0.000119824	Atp5mpl	8.03733e-48	-0.971899	0.982	0.999	1.53754e-43	Drd1	2.51297e-06	0.145021	0.071	0.011	0.0508248	Tle4	7.02964e-45	0.687408	0.726	0.464	1.42174e-40	Map6	1.63675e-41	0.40027	0.313	0.057	3.31033e-37	Cst3	2.89498e-12	-0.545779	1	1	5.85509e-08
1700010K24Rik	1.09411e-05	0.026967	0.019	0	0.209304	Slc4a7	1.88275e-14	-0.934102	0.608	0.893	3.6017e-10	Sh2d2a	9.03126e-09	0.0588937	0.042	0	0.000172768	Gngt1	2.71205e-47	-1.41838	0.819	0.998	5.18815e-43	Celf1	3.65301e-06	-0.375351	0.818	0.938	0.0738822	Cngb1	2.83021e-42	-0.473605	0.908	0.966	5.72411e-38	mt-Nd3	1.77516e-41	1.01557	0.962	0.913	3.59025e-37	Rpgrip1	4.67891e-12	-0.537962	0.982	1	9.4631e-08
Gm9857	1.09411e-05	0.026967	0.019	0	0.209304	Smim40	1.90306e-14	-0.836676	0.722	0.972	3.64056e-10	Dmrtb1	9.03126e-09	0.0588937	0.042	0	0.000172768	Fam57b	9.58314e-46	-1.21681	0.518	0.917	1.83325e-41	Pcsk6	4.23134e-06	0.0963236	0.03	0.002	0.0855789	2025-03-01	2.98657e-39	-0.444684	0.957	0.983	6.04035e-35	mt-Cytb	1.88666e-41	1.00208	1	0.998	3.81577e-37	Pde6g	5.19312e-12	-0.585903	1	1	1.05031e-07
Fut9	1.09411e-05	0.026967	0.019	0	0.209304	Zmiz1	2.83845e-14	0.601185	0.481	0.129	5.42995e-10	Gm15635	9.03126e-09	0.0588937	0.042	0	0.000172768	Acbd6	1.72564e-45	1.13079	0.47	0.081	3.30116e-41	Rbp4	4.28255e-06	0.0549037	0.03	0.002	0.0866145	Pex5l	1.99193e-38	-0.499787	0.691	0.834	4.02868e-34	Ablim1	3.14181e-41	0.614902	0.336	0.071	6.3543e-37	Fam57b	5.87505e-12	-0.626108	0.795	0.934	1.18823e-07
Gm12841	1.09411e-05	0.026967	0.019	0	0.209304	Tmtc1	4.8697e-14	0.377145	0.228	0.021	9.31574e-10	Gpr179	9.03126e-09	0.115477	0.042	0	0.000172768	Tnc	1.91863e-45	0.385002	0.211	0.001	3.67034e-41	Ankle1	4.3343e-06	0.0408285	0.03	0.002	0.0876613	Cebpb	5.61765e-38	0.74335	0.287	0.098	1.13617e-33	Dmd	1.10154e-39	-0.878123	0.592	0.858	2.22787e-35	Cebpb	6.25934e-12	1.01405	0.312	0.095	1.26595e-07
Lin28a	1.09411e-05	0.026967	0.019	0	0.209304	Ldhb	6.35998e-14	-1.04635	0.278	0.706	1.21666e-09	Gm15972	9.03126e-09	0.0588937	0.042	0	0.000172768	Atp2b4	4.48867e-45	0.50007	0.235	0.005	8.58682e-41	Zfp52	4.49367e-06	0.0385918	0.03	0.002	0.0908844	Pdlim3	9.76306e-38	0.699368	0.514	0.287	1.97458e-33	Ptprf	1.66123e-39	0.425243	0.359	0.08	3.35984e-35	Rdh12	6.45658e-12	-0.857465	0.473	0.717	1.30584e-07
Gm13025	1.09411e-05	0.026967	0.019	0	0.209304	Atp2b4	1.1303e-13	0.354431	0.127	0	2.16227e-09	Mical1	9.03148e-09	0.115477	0.042	0	0.000172772	Smim40	4.68146e-45	-1.19601	0.633	0.964	8.95562e-41	mt-Nd2	4.62873e-06	0.357928	1	1	0.0936161	Aipl1	4.33296e-37	-0.438059	0.951	0.987	8.76341e-33	mt-Co1	2.06357e-39	1.02559	1	0.997	4.17357e-35	Fzd3	7.12333e-12	0.395376	0.321	0.086	1.44069e-07
Lrrc38	1.09411e-05	0.026967	0.019	0	0.209304	Osbpl6	1.44286e-13	0.26611	0.215	0.019	2.76019e-09	Atp5b	1.74946e-08	-0.553788	1	1	0.000334672	Mical2	8.08788e-44	0.40884	0.241	0.007	1.54721e-39	mt-Nd5	5.8876e-06	0.360323	1	0.994	0.119077	Rcvrn	1.05268e-36	-0.594105	0.972	0.995	2.12905e-32	mt-Nd1	3.50206e-39	1.0069	0.992	0.983	7.08292e-35	Tma7	1.20573e-11	-0.421608	1	1	2.43858e-07
Arl9	1.09411e-05	0.026967	0.019	0	0.209304	Rp1	2.00674e-13	-0.810534	0.835	0.998	3.83889e-09	Ndufb8	3.91511e-08	-0.56522	0.958	0.997	0.000748961	Mdga1	7.70076e-43	0.474329	0.253	0.01	1.47316e-38	mt-Nd1	7.88679e-06	0.351639	1	1	0.15951	Map2	1.43876e-36	-0.382823	0.986	0.997	2.90989e-32	Itga6	1.6258e-38	0.386729	0.271	0.046	3.28819e-34	Rraga	1.39607e-11	-0.660561	0.955	0.991	2.82356e-07
Ache	1.09411e-05	0.026967	0.019	0	0.209304	Osgep	2.78633e-13	-0.98433	0.519	0.871	5.33025e-09	Plpp3	3.99114e-08	0.338746	0.188	0.03	0.000763504	Ttc28	1.56777e-42	1.09951	0.62	0.163	2.99915e-38	mt-Nd4l	9.6546e-06	0.33315	1	0.987	0.195264	Acbd6	1.05118e-35	0.394465	0.32	0.118	2.12602e-31	Irx3	3.76343e-38	0.288492	0.172	0.014	7.61153e-34	Mir124-2hg	1.56952e-11	-0.668882	0.938	0.989	3.17435e-07
Gm38832	1.09411e-05	0.026967	0.019	0	0.209304	Dmd	3.12561e-13	-0.822455	0.671	0.986	5.97929e-09	Calm1	4.88672e-08	0.687371	1	0.962	0.00093483	Cntn1	6.53452e-42	0.836568	0.446	0.074	1.25005e-37	Samd11	9.77266e-06	-0.329529	1	1	0.197652	Rho	1.75817e-35	-0.834286	0.895	0.944	3.55589e-31	Onecut3	6.80229e-38	0.266124	0.176	0.016	1.37576e-33	Gm2694	1.60073e-11	0.366408	0.375	0.115	3.23747e-07
9530026P05Rik	1.09411e-05	0.026967	0.019	0	0.209304	Gabrr3	3.76943e-13	0.285683	0.203	0.016	7.21092e-09	Epha8	6.14058e-08	0.252438	0.271	0.061	0.00117469	Sag	5.5926e-41	-1.16625	0.934	1	1.06986e-36	Gm30382	1.01194e-05	0.139725	0.051	0.006	0.204664	Atf3	1.77112e-35	0.78675	0.454	0.239	3.5821e-31	Tubb2a	3.006e-36	0.763429	0.672	0.313	6.07964e-32	Casp3	4.10751e-11	0.922708	0.643	0.348	8.30744e-07
Gm20705	1.09411e-05	0.026967	0.019	0	0.209304	Cntn1	6.99513e-13	0.555043	0.367	0.082	1.33817e-08	H2afy	9.71081e-08	-0.704693	0.771	0.909	0.00185768	Cngb1	6.67204e-40	-1.19206	0.542	0.913	1.27636e-35	Fzd3	1.25923e-05	0.335218	0.293	0.139	0.254679	Cdh13	4.53791e-35	0.409363	0.31	0.116	9.17792e-31	Cacna1d	1.20479e-35	0.33279	0.195	0.023	2.43669e-31	Rplp0	5.18883e-11	0.49745	1	0.998	1.04944e-06
Etfbkmt	1.09411e-05	0.026967	0.019	0	0.209304	Plpp3	7.67101e-13	0.510389	0.253	0.035	1.46747e-08	Ppp1r14b	1.01799e-07	0.345775	0.333	0.092	0.00194741	Nrl	7.32698e-40	-1.01649	0.747	0.994	1.40165e-35	Rnf217	1.37253e-05	0.194679	0.111	0.029	0.277595	Eef1a1	5.576e-34	0.277282	1	1	1.12775e-29	Gm26871	2.25483e-35	0.237847	0.134	0.008	4.56039e-31	Nrl	7.40557e-11	-0.578381	0.982	0.996	1.49778e-06
Vmn1r55	1.09411e-05	0.026967	0.019	0	0.209304	Cltb	1.02697e-12	1.03384	0.81	0.54	1.96459e-08	Itgb1bp1	1.1905e-07	0.698698	0.479	0.193	0.00227742	Fzd10os	7.51078e-40	0.381987	0.193	0.002	1.43681e-35	Samd7	1.51685e-05	-0.367027	0.97	0.987	0.306782	Epb41	1.09271e-33	-0.352399	0.992	0.999	2.21001e-29	Kcna1	1.36003e-34	0.263629	0.198	0.025	2.75066e-30	Epb41l2	8.69385e-11	-0.554266	0.973	0.995	1.75833e-06
Gm29442	1.09411e-05	0.026967	0.019	0	0.209304	Fam57b	1.0677e-12	-0.73954	0.734	0.935	2.04251e-08	Cep112it	1.57676e-07	0.0838288	0.062	0.003	0.00301634	Tc2n	8.36216e-39	0.35816	0.181	0.001	1.59968e-34	Rpgrip1	2.02591e-05	-0.311771	0.99	1	0.40974	Clu	3.14664e-33	0.4825	0.995	0.97	6.36409e-29	Tma7	1.69956e-34	-0.430012	1	1	3.43735e-30	Igfbp2	1.04551e-10	0.565294	0.339	0.108	2.11454e-06
Gm19345	1.09411e-05	0.026967	0.019	0	0.209304	Ptms	2.23963e-12	0.594946	1	0.988	4.28441e-08	Cd63	1.59246e-07	0.618533	1	0.873	0.00304637	Cabp5	2.04431e-38	0.521315	0.205	0.005	3.91076e-34	Otx2	2.31898e-05	-0.287496	1	1	0.469014	Nxnl1	4.19942e-32	-0.461932	0.657	0.786	8.49333e-28	Ttll7	4.29989e-34	0.37393	0.263	0.05	8.69653e-30	Epb41	1.46923e-10	-0.519125	1	0.998	2.97153e-06
Ryr1	1.09411e-05	0.026967	0.019	0	0.209304	Amer2	2.93213e-12	0.730893	0.962	0.89	5.60917e-08	Cntfr	3.44107e-07	0.23189	0.208	0.042	0.00658277	H3f3a	3.414e-38	-0.611408	1	1	6.53099e-34	Epb41l2	3.19167e-05	-0.303736	1	0.998	0.645514	Cd63	1.18754e-31	0.415673	0.99	0.978	2.4018e-27	Grk3	5.22779e-34	0.213146	0.13	0.008	1.05732e-29	Ldha	1.7841e-10	-0.454161	0.991	1	3.60834e-06
Ggn	1.09411e-05	0.026967	0.019	0	0.209304	Sptb	2.97596e-12	0.209704	0.152	0.007	5.69301e-08	Parp10	4.44541e-07	0.213325	0.083	0.006	0.00850407	Marcks	4.92744e-38	1.15998	0.964	0.711	9.42619e-34	mt-Nd3	3.37678e-05	0.332306	1	0.999	0.682954	Rs1	1.70609e-31	-0.394885	0.969	0.986	3.45057e-27	Prph2	9.69974e-34	-0.577995	0.935	0.969	1.96177e-29	Cadm2	1.82427e-10	-0.554357	0.964	0.993	3.68959e-06
Tdrd12	1.09411e-05	0.026967	0.019	0	0.209304	Tle3	3.39052e-12	0.232011	0.127	0.002	6.48606e-08	Atp5o	4.6254e-07	-0.524158	0.958	0.992	0.0088484	Tma7	6.94523e-38	-0.641665	1	1	1.32862e-33	Gm5914	3.62864e-05	0.347147	0.737	0.546	0.733893	Eif1	1.9448e-31	0.38687	1	1	3.93335e-27	Auts2	2.99987e-33	0.632826	0.469	0.166	6.06723e-29	Map2	2.16643e-10	-0.535805	0.964	0.991	4.3816e-06
Saa1	1.09411e-05	0.026967	0.019	0	0.209304	Fam135b	3.50351e-12	0.244082	0.139	0.005	6.70222e-08	Cox5b	5.31596e-07	-0.503956	1	0.996	0.0101694	Tle4	8.62814e-38	0.965587	0.602	0.178	1.65056e-33	Ttc14	3.7241e-05	-0.31318	0.889	0.969	0.753199	Samd7	2.1166e-31	-0.449969	0.931	0.967	4.28083e-27	Tcf7l2	8.01107e-33	0.459823	0.374	0.107	1.62024e-28	Samd11	2.16787e-10	-0.580776	0.955	0.991	4.38451e-06
Gabrg3	1.09411e-05	0.026967	0.019	0	0.209304	Minar2	3.94772e-12	0.240731	0.139	0.005	7.55198e-08	Stmn1	8.62395e-07	0.683644	0.583	0.289	0.0164976	Wfdc2	9.07028e-38	0.891747	0.169	0	1.73515e-33	Lcorl	3.80833e-05	-0.348923	0.899	0.936	0.770234	Ddit3	3.30196e-31	0.590545	0.707	0.5	6.67822e-27	Sulf2	3.49415e-32	0.406255	0.34	0.089	7.06692e-28	Eef1a1	2.53004e-10	0.406429	1	1	5.11701e-06
Anpep	1.09411e-05	0.026967	0.019	0	0.209304	Lhx4	3.95271e-12	0.237388	0.127	0.002	7.56153e-08	Cox7c	9.16558e-07	-0.396134	1	1	0.0175337	Cited1	7.14783e-37	0.820934	0.494	0.113	1.36738e-32	Trib1	3.82327e-05	-0.376594	0.707	0.815	0.773257	Pde6g	3.72459e-31	-0.340491	0.999	0.999	7.53298e-27	Prkcb	1.60295e-31	0.266486	0.183	0.024	3.24196e-27	Slc17a7	2.99302e-10	-0.569366	0.893	0.966	6.05337e-06
Gm16348	1.09411e-05	0.026967	0.019	0	0.209304	Slc38a1	4.32012e-12	0.729149	0.506	0.175	8.26438e-08	Efnb3	9.53401e-07	0.180116	0.104	0.011	0.0182386	Osgep	1.46175e-36	-1.28642	0.476	0.855	2.79633e-32	Rcc2	4.01038e-05	0.309863	0.384	0.21	0.811099	Cntn1	1.76691e-30	0.364422	0.418	0.201	3.57357e-26	Cyp4v3	6.04809e-31	0.24305	0.164	0.019	1.22323e-26	Asns	3.44528e-10	0.727628	0.393	0.159	6.96808e-06
Ucp1	1.09411e-05	0.026967	0.019	0	0.209304	Rraga	8.93991e-12	-0.702843	0.949	1	1.71021e-07	Gngt2	9.92161e-07	0.824966	0.979	0.987	0.01898	Ebpl	4.32181e-36	-0.976896	0.861	1	8.26762e-32	Gm12333	4.45674e-05	0.0397097	0.03	0.002	0.901375	Creb3l1	3.07486e-30	0.272308	0.178	0.043	6.21891e-26	Cadm2	6.79718e-31	-0.731418	0.584	0.823	1.37473e-26	Bbc3	4.78603e-10	0.53555	0.295	0.091	9.67975e-06
Gm45765	1.09411e-05	0.026967	0.019	0	0.209304	Cadm2	2.38374e-11	-0.683777	0.785	0.97	4.56009e-07	Atp5k	1.29558e-06	-0.548105	0.979	0.997	0.0247844	Gabrb3	1.01713e-35	1.02695	0.62	0.213	1.94577e-31	Gm47882	4.45674e-05	0.0397097	0.03	0.002	0.901375	Zfp445	1.00699e-29	-0.390027	0.849	0.926	2.03663e-25	Zfp618	7.74202e-31	0.243516	0.172	0.021	1.56582e-26	Tax1bp1	5.85182e-10	-0.446666	1	1	1.18353e-05
6530413G14Rik	1.09411e-05	0.026967	0.019	0	0.209304	Marcks	2.82076e-11	0.947464	0.911	0.72	5.39612e-07	Tmsb4x	1.31109e-06	0.819535	1	0.98	0.0250812	Cntfr	3.56244e-35	0.495053	0.319	0.039	6.81494e-31	2025-03-01	4.64826e-05	-0.337199	0.919	0.979	0.940112	Casp3	1.15645e-29	0.601993	0.719	0.547	2.33891e-25	Mdm2	9.58259e-31	0.733635	0.58	0.275	1.93808e-26	Afap1	6.73099e-10	0.351743	0.348	0.115	1.36134e-05
Tmem202	1.09411e-05	0.026967	0.019	0	0.209304	Stmn1	3.06501e-11	1.09098	0.62	0.308	5.86336e-07	Baiap2	1.3954e-06	0.207758	0.229	0.053	0.026694	Rdh12	4.13741e-35	-1.18784	0.114	0.663	7.91487e-31	Upf3b	5.19559e-05	-0.290349	0.97	0.97	1	Slc17a7	3.71547e-29	-0.3812	0.956	0.984	7.51454e-25	Igsf3	3.13936e-30	0.218402	0.164	0.019	6.34936e-26	Samd7	1.00582e-09	-0.63465	0.777	0.946	2.03426e-05
Gm10634	1.09411e-05	0.026967	0.019	0	0.209304	Ptprg	3.71059e-11	0.304735	0.203	0.023	7.09837e-07	Tmem215	1.46308e-06	0.559784	0.25	0.067	0.0279887	Epb41l4b	5.30118e-35	0.494934	0.295	0.031	1.01412e-30	Col1a2	5.27334e-05	0.0737225	0.04	0.005	1	Rpgrip1	8.08835e-29	-0.296602	0.994	1	1.63587e-24	C130073E24Rik	3.38571e-30	0.480275	0.221	0.04	6.84761e-26	Gpm6b	1.00635e-09	-0.535219	0.839	0.941	2.03535e-05
Zic4	1.09411e-05	0.026967	0.019	0	0.209304	Prph2	4.83685e-11	-0.619858	0.924	0.991	9.2529e-07	Cox7a2	1.48268e-06	-0.391463	1	1	0.0283637	Aldoa	7.00826e-35	-0.974233	0.946	0.998	1.34068e-30	Gm17501	6.17308e-05	0.0419482	0.02	0.001	1	Hcn1	3.81551e-28	-0.354137	0.981	0.995	7.71686e-24	Epb41	3.83991e-30	-0.614588	0.771	0.904	7.76621e-26	Rab27b	1.33412e-09	0.314315	0.205	0.045	2.69825e-05
Ulbp1	1.09411e-05	0.026967	0.019	0	0.209304	Mapk4	5.6777e-11	0.216414	0.114	0.002	1.08614e-06	Casp3	2.05979e-06	0.602672	0.292	0.087	0.0394038	Ndufb8	9.5607e-35	-0.779797	0.94	0.995	1.82896e-30	Crybb1	6.17308e-05	0.0419482	0.02	0.001	1	Irf2bpl	4.47419e-28	0.415456	0.69	0.498	9.04905e-24	Tmem132e	1.25044e-29	0.213713	0.13	0.01	2.52901e-25	Frmd4b	1.41961e-09	-0.512802	0.688	0.889	2.87117e-05
4933428P19Rik	1.09411e-05	0.026967	0.019	0	0.209304	Rdh12	7.6251e-11	-0.893595	0.278	0.678	1.45868e-06	Lrp8	2.20609e-06	0.564861	0.542	0.246	0.0422025	Cpe	1.12111e-34	-1.01244	0.319	0.792	2.14469e-30	Gm47230	6.17308e-05	0.0419482	0.02	0.001	1	Cst3	2.41273e-27	-0.327935	1	1	4.87974e-23	Sez6	1.37637e-29	0.6	0.618	0.298	2.7837e-25	Dmd	1.45905e-09	-0.354032	0.973	0.995	2.95092e-05
Gm48689	1.09411e-05	0.026967	0.019	0	0.209304	Lmo1	1.30905e-10	-0.776878	0.19	0.579	2.50422e-06	Kcnab3	2.2594e-06	0.142891	0.125	0.018	0.0432223	Mapk4	1.20428e-34	0.336188	0.169	0.002	2.30378e-30	Gm10734	6.21544e-05	0.0277343	0.02	0.001	1	Chac1	3.21497e-27	0.436801	0.19	0.057	6.50227e-23	Tiam1	1.7045e-29	0.289119	0.206	0.034	3.44735e-25	Slc4a7	1.83392e-09	-0.534292	0.911	0.962	3.70911e-05
Myo1a	1.09411e-05	0.026967	0.019	0	0.209304	H3f3a	1.81454e-10	-0.430258	0.987	1	3.47122e-06	Fam171a2	2.38588e-06	0.185523	0.083	0.008	0.0456419	Rraga	2.34479e-34	-0.956061	0.867	0.998	4.48558e-30	Mpped1	6.21544e-05	0.0277343	0.02	0.001	1	Celf2	9.99723e-27	-0.313328	0.96	0.992	2.02194e-22	Scn3b	2.00171e-29	0.240939	0.149	0.016	4.04846e-25	Rpl12	1.96758e-09	0.460786	1	0.984	3.97942e-05
Gm16170	1.09411e-05	0.0534393	0.019	0	0.209304	Cbx5	1.98438e-10	0.539307	0.443	0.145	3.79612e-06	Rtn4rl1	2.39157e-06	0.454768	0.312	0.101	0.0457507	Necab2	9.05027e-34	0.55544	0.199	0.008	1.73132e-29	Ptpn20	6.21544e-05	0.0277343	0.02	0.001	1	Gpm6b	2.3156e-26	-0.355225	0.884	0.938	4.68331e-22	Ankrd33b	4.50323e-28	-0.702946	0.435	0.728	9.10779e-24	Snap25	2.10964e-09	-0.49353	0.973	0.998	4.26674e-05
Pdlim4	1.09411e-05	0.026967	0.019	0	0.209304	Scd2	2.18383e-10	0.47479	0.354	0.093	4.17767e-06	St7	2.62533e-06	0.104603	0.083	0.008	0.0502226	Mgarp	1.37364e-33	-1.03046	0.657	0.955	2.62778e-29	Csmd3	6.24256e-05	0.125347	0.061	0.011	1	Ppp2r5c	4.25017e-26	-0.387274	0.895	0.954	8.59598e-22	Pdk1	5.13438e-28	0.221397	0.16	0.02	1.03843e-23	Dlc1	2.68269e-09	-0.501319	0.92	0.987	5.42574e-05
1700007J10Rik	1.09411e-05	0.026967	0.019	0	0.209304	Tmem158	2.57092e-10	1.19835	0.544	0.243	4.91817e-06	Trem2	2.62533e-06	0.104603	0.083	0.008	0.0502226	Impg2	4.0446e-33	-0.95368	0.476	0.912	7.73732e-29	Hsh2d	6.25819e-05	0.0408285	0.02	0.001	1	Tax1bp1	5.71323e-26	-0.262378	1	1	1.1555e-21	Epb41l2	8.38473e-28	-0.684552	0.576	0.805	1.69581e-23	Mak	3.40234e-09	-0.527878	0.839	0.935	6.88123e-05
Itgb3	1.09411e-05	0.026967	0.019	0	0.209304	Cox7a2	3.00913e-10	-0.46239	1	1	5.75646e-06	Cadm3	2.73878e-06	0.573727	0.312	0.105	0.0523928	Rps23	6.13891e-33	-0.680566	0.994	1	1.17437e-28	P2ry13	6.30116e-05	0.0266147	0.02	0.001	1	Abhd14b	6.1749e-26	-0.3625	0.929	0.954	1.24887e-21	Rom1	1.08633e-27	-0.451325	0.977	0.997	2.1971e-23	Pitpnm3	4.72982e-09	-0.633105	0.339	0.624	9.56606e-05
Gm15642	1.09411e-05	0.026967	0.019	0	0.209304	Sipa1l1	3.82976e-10	0.241289	0.19	0.023	7.32634e-06	Tmem246	2.88531e-06	0.177612	0.167	0.032	0.055196	Ptprg	1.04112e-32	0.48267	0.265	0.026	1.99166e-28	Nkain2	6.30116e-05	0.0266147	0.02	0.001	1	Gars	1.35461e-25	0.454945	0.616	0.413	2.73971e-21	Pik3r1	1.08643e-27	-0.752248	0.557	0.793	2.1973e-23	Etfb	5.83265e-09	0.436655	0.643	0.342	0.000117965
St6galnac1	1.09411e-05	0.026967	0.019	0	0.209304	Arr3	4.50409e-10	0.257777	0.165	0.016	8.61632e-06	Neurod4	3.02599e-06	0.757733	0.646	0.363	0.0578873	Rbfox3	1.19222e-32	0.385924	0.223	0.015	2.28071e-28	Gm47754	6.30116e-05	0.0266147	0.02	0.001	1	Rtbdn	1.70405e-25	-0.415247	0.735	0.829	3.44643e-21	Col6a6	2.35008e-27	0.121445	0.084	0.002	4.75304e-23	Rcvrn	7.01534e-09	-0.818017	0.991	0.993	0.000141885
Gm11748	1.09411e-05	0.026967	0.019	0	0.209304	Atp5k	4.651e-10	-0.639557	1	0.998	8.89737e-06	Cyp4f17	3.32418e-06	0.124879	0.104	0.013	0.0635916	Fam181b	3.36287e-32	0.260075	0.151	0.001	6.43316e-28	Fbln1	6.30116e-05	0.0266147	0.02	0.001	1	Fam57b	1.92508e-25	-0.381154	0.896	0.946	3.89348e-21	mt-Nd4l	2.64429e-27	0.684125	0.771	0.44	5.34809e-23	Impg2	8.51774e-09	-0.523087	0.955	0.989	0.000172271
5430427M07Rik	1.09411e-05	0.026967	0.019	0	0.209304	Cited1	5.38146e-10	0.608571	0.405	0.126	1.02947e-05	Sag	3.5218e-06	-0.508777	1	0.999	0.067372	Mgat4a	3.3965e-32	0.230781	0.151	0.001	6.49751e-28	Ebpl	6.63869e-05	-0.205277	1	1	1	Mthfd2	7.28861e-25	0.46632	0.32	0.155	1.47412e-20	Crx	3.11832e-27	-0.555857	0.79	0.914	6.30679e-23	Frmd4a	9.16994e-09	0.323145	0.393	0.154	0.000185462
Gm47646	1.09411e-05	0.026967	0.019	0	0.209304	Nell2	5.90803e-10	0.235378	0.089	0	1.13021e-05	Pgf	4.097e-06	0.352318	0.292	0.09	0.0783756	Apba2	4.14547e-32	0.324178	0.187	0.007	7.93028e-28	Fyco1	7.09196e-05	-0.330898	0.899	0.956	1	Samd11	8.77818e-25	-0.356741	0.969	0.994	1.77539e-20	Ttc28	3.34661e-27	0.496559	0.527	0.226	6.76852e-23	Sox9	9.81077e-09	0.258255	0.259	0.073	0.000198423
Hk3	1.09411e-05	0.026967	0.019	0	0.209304	Kcnb1	6.27261e-10	-0.717975	0.608	0.871	1.19995e-05	Ppp2r5c	4.42248e-06	-0.615251	0.771	0.87	0.084602	Kcnab1	4.95931e-32	0.629457	0.41	0.084	9.48717e-28	Rp1	7.20806e-05	-0.256536	1	1	1	Maf	1.03975e-24	0.402709	0.378	0.193	2.1029e-20	Ldha	6.91621e-27	-0.456635	0.962	0.998	1.3988e-22	Gnai2	1.00155e-08	0.467183	0.804	0.685	0.000202564
Spata31d1d	1.09411e-05	0.026967	0.019	0	0.209304	Cox8a	6.96298e-10	-0.410094	1	1	1.33202e-05	Gapdh	4.64917e-06	-0.416943	1	1	0.0889386	Dmd	5.77933e-32	-0.952937	0.657	0.958	1.10559e-27	Epb41	7.41305e-05	-0.230368	1	1	1	Gabarap	1.43714e-24	0.330477	0.993	0.995	2.90661e-20	Sipa1l1	1.02202e-26	0.275218	0.198	0.035	2.06704e-22	Tgfb2	1.01132e-08	0.468769	0.429	0.186	0.000204539
Ankrd55	1.09411e-05	0.026967	0.019	0	0.209304	Tma7	7.90531e-10	-0.42849	1	1	1.51229e-05	Kitl	5.12234e-06	0.246109	0.042	0.001	0.0979903	Cadm2	1.25981e-31	-0.923426	0.657	0.959	2.41002e-27	Pdc	8.62945e-05	-0.173212	1	1	1	Casz1	1.63228e-24	-0.336463	0.989	0.998	3.30128e-20	2025-03-01	2.79935e-26	-0.702445	0.271	0.605	5.66169e-22	Eif4ebp1	1.07013e-08	0.567574	0.277	0.093	0.000216434
Fst	1.09411e-05	0.026967	0.019	0	0.209304	Ptma	8.63463e-10	0.552456	1	0.986	1.6518e-05	Rgs8	5.19504e-06	0.0856447	0.042	0.001	0.0993811	Nr2e3	2.26414e-31	-0.92791	0.831	0.998	4.3313e-27	Kansl1l	9.13956e-05	-0.325369	0.747	0.85	1	Dusp8	9.83322e-24	0.433309	0.945	0.91	1.98877e-19	Maml3	3.01305e-26	0.380497	0.324	0.097	6.0939e-22	Atp1a3	1.12628e-08	-0.435811	0.991	0.998	0.00022779
Gm17210	1.09411e-05	0.026967	0.019	0	0.209304	Rps23	1.00939e-09	-0.50471	1	1	1.93097e-05	Itga2b	5.19504e-06	0.0856447	0.042	0.001	0.0993811	Fzd10	3.39539e-31	0.276012	0.139	0	6.49538e-27	Arhgap31	0.000103479	-0.340392	0.818	0.921	1	Rpl13a	1.15085e-23	0.237423	1	1	2.32759e-19	Hcn1	3.529e-26	-0.676118	0.55	0.8	7.13741e-22	Prcd	1.17863e-08	-0.50898	0.902	0.971	0.000238377
Ripk3	1.09411e-05	0.026967	0.019	0	0.209304	Gngt1	1.26972e-09	-0.712212	0.873	1	2.42898e-05	Plcb3	5.19504e-06	0.0856447	0.042	0.001	0.0993811	Lmo1	1.07956e-30	-0.916351	0.096	0.624	2.0652e-26	Reln	0.000110717	0.16503	0.111	0.033	1	Creb5	1.99656e-23	0.545728	0.245	0.102	4.03804e-19	Gngt1	1.11687e-25	-0.37562	1	1	2.25887e-21	Nudt4	1.19844e-08	0.312348	0.339	0.122	0.000242385
2025-03-11	1.09411e-05	0.026967	0.019	0	0.209304	Rps4x	1.2967e-09	0.545835	1	1	2.48058e-05	4930558K02Rik	5.26862e-06	0.0570755	0.042	0.001	0.100789	Traf3ip2	1.26642e-30	0.373818	0.163	0.004	2.42266e-26	Unc13c	0.000111508	0.159066	0.061	0.012	1	Cdkn1a	8.67594e-23	0.342739	0.181	0.059	1.75471e-18	Frrs1l	5.45575e-25	0.248954	0.168	0.027	1.10343e-20	Rpl19	1.25491e-08	0.313489	1	1	0.000253805
Gm9920	1.09411e-05	0.026967	0.019	0	0.209304	Mgst3	1.3347e-09	0.630331	0.658	0.341	2.55328e-05	Csf1	5.26862e-06	0.0570755	0.042	0.001	0.100789	Marcksl1	1.35628e-30	0.6934	0.53	0.154	2.59456e-26	Rdh5	0.000119595	0.103284	0.071	0.016	1	Gm4258	1.40721e-22	-0.369884	0.823	0.886	2.84608e-18	Spock1	6.36591e-25	0.31043	0.176	0.03	1.28751e-20	2410006H16Rik	1.44113e-08	0.767989	0.884	0.815	0.000291469
Gm10856	1.09411e-05	0.026967	0.019	0	0.209304	Ndufb9	1.51746e-09	-0.425085	1	1	2.9029e-05	Fgr	5.26862e-06	0.0570755	0.042	0.001	0.100789	Rps4x	1.47762e-30	0.812323	0.994	1	2.82668e-26	Gm28529	0.000122065	0.079632	0.061	0.012	1	Asns	4.5528e-22	0.511992	0.385	0.222	9.20803e-18	Ebpl	9.36631e-25	-0.423159	0.985	0.998	1.89434e-20	Maf	1.49391e-08	0.545391	0.446	0.194	0.000302142
Fbln1	1.09411e-05	0.026967	0.019	0	0.209304	Pde6g	2.73395e-09	-0.756037	0.848	0.977	5.23004e-05	Sel1l3	5.26862e-06	0.0570755	0.042	0.001	0.100789	Shisal1	2.00929e-30	0.389731	0.265	0.029	3.84377e-26	Gnb1	0.000145054	-0.23749	1	1	1	Cltb	4.82719e-22	0.390937	0.905	0.823	9.76299e-18	mt-Nd5	9.75697e-25	0.74014	0.782	0.501	1.97335e-20	Prox1	1.73279e-08	0.502985	0.366	0.145	0.000350456
Acr	1.09411e-05	0.026967	0.019	0	0.209304	Atp5h	3.13907e-09	-0.432192	1	1	6.00504e-05	5830487J09Rik	5.26862e-06	0.0570755	0.042	0.001	0.100789	Ndufa4	2.07226e-30	-0.581834	1	1	3.96424e-26	Prr16	0.000159989	0.0610294	0.04	0.005	1	Impg2	6.76144e-22	-0.3056	0.993	0.999	1.3675e-17	Chd3	2.46549e-24	0.536977	0.565	0.278	4.98646e-20	Rs1	2.04764e-08	-0.524929	0.848	0.959	0.000414136
Gm27209	1.09411e-05	0.026967	0.019	0	0.209304	Ssu72	3.60473e-09	-0.555577	0.899	0.977	6.89585e-05	Spata48	5.26862e-06	0.0570755	0.042	0.001	0.100789	Sms	3.1899e-30	0.781475	0.759	0.354	6.10228e-26	Adamtsl2	0.000163837	0.0470902	0.04	0.005	1	Bbc3	8.65896e-22	0.405588	0.254	0.113	1.75127e-17	Utrn	2.50021e-24	0.165111	0.107	0.009	5.05667e-20	Otx2	2.06471e-08	-0.43029	0.991	1	0.000417587
Ciita	1.09411e-05	0.026967	0.019	0	0.209304	Ppp2r5c	3.84485e-09	-0.710584	0.62	0.834	7.3552e-05	Hist1h2bp	5.26862e-06	0.0570755	0.042	0.001	0.100789	Rcvrn	3.46716e-30	-1.99597	0.404	0.766	6.63269e-26	Lrrc10b	0.000165828	0.126349	0.091	0.025	1	Rtn4	1.29709e-21	-0.268815	0.978	0.993	2.62337e-17	Ntrk3	3.96246e-24	0.184905	0.137	0.017	8.01408e-20	Hopx	2.11375e-08	0.230991	0.304	0.1	0.000427507
Gm15558	1.09411e-05	0.026967	0.019	0	0.209304	Ttc32	3.90314e-09	0.210915	0.177	0.023	7.46671e-05	Ier5	5.88231e-06	0.501409	0.438	0.185	0.112529	Dnm3	4.33478e-30	-1.20053	0.325	0.75	8.29243e-26	Xlr3b	0.000179059	0.127125	0.131	0.045	1	Eif3b	1.7775e-21	0.533596	0.673	0.511	3.59499e-17	Slc8a3	3.9958e-24	0.305592	0.336	0.106	8.08151e-20	Cspp1	2.11432e-08	-0.446227	0.938	0.977	0.000427621
4930483P17Rik	1.09411e-05	0.026967	0.019	0	0.209304	Acbd6	5.01598e-09	0.616452	0.304	0.084	9.59557e-05	Rdh12	6.11646e-06	-0.685224	0.396	0.704	0.117008	Nnat	4.67382e-30	3.69316	0.524	0.172	8.94102e-26	Evl	0.000192767	0.402061	0.535	0.372	1	Tma7	2.37246e-21	-0.216487	1	1	4.79829e-17	Samd7	4.35095e-24	-0.75865	0.374	0.661	8.7998e-20	Cadm1	2.30491e-08	-0.483313	0.911	0.984	0.000466169
Atp13a4	1.09411e-05	0.026967	0.019	0	0.209304	Pde6c	8.66412e-09	0.286055	0.114	0.007	0.000165745	Gas6	6.85919e-06	-0.533892	0.188	0.541	0.131216	Zfp423	6.0423e-30	0.343944	0.205	0.014	1.15589e-25	Npepps	0.000202707	-0.322085	0.859	0.908	1	Atp2b1	3.22584e-21	0.282862	1	0.998	6.52427e-17	Samd11	1.08679e-23	-0.652167	0.645	0.817	2.19803e-19	Rtbdn	2.49227e-08	-0.653014	0.375	0.624	0.000504061
1700010I14Rik	1.09411e-05	0.0534393	0.019	0	0.209304	Cdh13	9.34432e-09	0.249319	0.114	0.007	0.000178757	Hsbp1l1	7.99852e-06	-0.593656	0.167	0.499	0.153012	Gapdh	1.27606e-29	-0.707404	0.988	1	2.4411e-25	Smoc2	0.000207881	0.0931786	0.061	0.012	1	Ccdc126	6.80133e-21	-0.311649	0.802	0.881	1.37557e-16	Tnr	1.18593e-23	0.242928	0.179	0.032	2.39854e-19	Smim40	2.63614e-08	-0.502111	0.973	0.995	0.000533159
Unc93a	1.09411e-05	0.026967	0.019	0	0.209304	Ccdc88c	9.42861e-09	0.206361	0.114	0.007	0.000180369	Tmsb10	8.04243e-06	0.618185	1	0.963	0.153852	Wscd2	1.39936e-29	0.238161	0.139	0.001	2.67698e-25	Klf11	0.000224743	0.115477	0.111	0.035	1	Ppfia2	9.02676e-21	-0.322199	0.75	0.836	1.82566e-16	Onecut1	1.30673e-23	0.231307	0.168	0.028	2.64286e-19	Rpl15	2.64438e-08	0.349401	1	1	0.000534825
Gm49092	1.09411e-05	0.026967	0.019	0	0.209304	Psd3	1.2576e-08	0.259688	0.203	0.035	0.000240578	Ung	9.94203e-06	0.130279	0.083	0.009	0.190191	Slc4a7	2.32683e-29	-0.979309	0.548	0.867	4.45123e-25	Eml5	0.000226355	-0.290288	0.899	0.965	1	Sipa1l1	1.34678e-20	0.267994	0.219	0.089	2.72386e-16	Ank3	1.39531e-23	0.523578	0.55	0.268	2.82202e-19	Ptprn	2.69936e-08	0.703925	0.25	0.081	0.000545945
Gm41556	1.09411e-05	0.026967	0.019	0	0.209304	Kcnd3	1.32636e-08	0.228652	0.101	0.005	0.000253733	Gchfr	1.00164e-05	0.153644	0.083	0.009	0.191614	Rbm24	3.22058e-29	0.713055	0.458	0.117	6.16097e-25	Gm5784	0.000233099	0.052667	0.03	0.003	1	Acsl1	1.37114e-20	-0.300479	0.896	0.933	2.77313e-16	Mast4	4.21752e-23	0.239909	0.153	0.024	8.52994e-19	Dkk3	3.27358e-08	0.316766	0.339	0.127	0.000662082
Tnxb	1.09411e-05	0.026967	0.019	0	0.209304	Uqcrq	1.40764e-08	-0.453311	1	0.998	0.000269281	Kcnma1	1.04532e-05	0.102798	0.083	0.009	0.199971	Amer2	4.38595e-29	0.919018	0.97	0.868	8.39032e-25	Ngef	0.000235052	0.0643729	0.03	0.003	1	Tulp1	1.87459e-20	-0.213275	0.999	1	3.79136e-16	Jph4	4.892e-23	0.184905	0.134	0.017	9.89407e-19	Creb5	3.5531e-08	0.604425	0.241	0.073	0.000718614
Ly6g5b	1.09411e-05	0.026967	0.019	0	0.209304	Myo1b	1.57273e-08	0.200647	0.089	0.002	0.000300863	Rho	1.06668e-05	-1.61072	0.25	0.554	0.204056	Ttc3	5.53006e-29	0.933761	0.94	0.714	1.0579e-24	Rassf10	0.00023603	0.0515499	0.03	0.003	1	Dpysl3	2.16517e-20	-0.272939	0.967	0.987	4.37906e-16	Fat1	5.19965e-23	0.220022	0.164	0.028	1.05163e-18	Zfp445	3.84423e-08	-0.463212	0.786	0.93	0.000777495
Lama1	1.09411e-05	0.026967	0.019	0	0.209304	Dst	1.59006e-08	0.411923	0.241	0.054	0.000304179	Ackr1	1.0759e-05	0.0991958	0.083	0.009	0.20582	Unc119	7.94116e-29	-0.586374	0.976	1	1.51914e-24	Gm26826	0.000237004	0.0385918	0.03	0.003	1	Rbp3	2.71549e-20	-0.343233	0.992	0.999	5.49208e-16	Tubb2b	7.47622e-23	0.580999	0.683	0.405	1.51207e-18	Sqstm1	3.88261e-08	0.460502	0.464	0.222	0.000785257
B930094E09Rik	1.09411e-05	0.026967	0.019	0	0.209304	Tc2n	1.62567e-08	0.135796	0.089	0.002	0.000310991	Usp51	1.0759e-05	0.0991958	0.083	0.009	0.20582	Rbp4	1.06625e-28	0.433104	0.175	0.008	2.03974e-24	Hus1b	0.000237004	0.0385918	0.03	0.003	1	Vegfa	3.20742e-20	0.453825	0.452	0.287	6.487e-16	Pde2a	9.09875e-23	0.124816	0.084	0.005	1.84022e-18	Prom1	3.92715e-08	-0.449533	0.955	0.993	0.000794265
Gm50163	1.09411e-05	0.026967	0.019	0	0.209304	Abca1	1.71759e-08	0.625056	0.684	0.374	0.000328576	Reep6	1.08928e-05	-0.67211	0.333	0.647	0.208379	Dnaic1	1.89558e-28	0.857997	0.392	0.089	3.62625e-24	Ppp1r3c	0.000237004	0.0385918	0.03	0.003	1	Cited2	4.40051e-20	-0.339977	0.864	0.921	8.90003e-16	Syt17	1.43392e-22	0.203826	0.13	0.017	2.90009e-18	Ppp2r5c	4.25477e-08	-0.474374	0.795	0.932	0.000860526
Spink14	1.09411e-05	0.026967	0.019	0	0.209304	Enc1	1.78047e-08	0.559448	0.405	0.15	0.000340603	Chrnb4	1.17239e-05	0.444608	0.375	0.15	0.224279	Kcnd3	4.27229e-28	0.236652	0.139	0.002	8.17288e-24	Rnf165	0.000237748	0.30325	0.485	0.311	1	Gnb3	5.08781e-20	0.316669	1	0.999	1.02901e-15	Sez6l	1.92619e-22	0.172441	0.103	0.009	3.89572e-18	Rpl17	4.26502e-08	0.377265	1	0.998	0.0008626
Gm50115	1.09411e-05	0.026967	0.019	0	0.209304	Nav1	1.91094e-08	0.482425	0.367	0.121	0.000365562	Uqcrq	1.31801e-05	-0.418731	1	1	0.252136	Wfikkn2	4.89361e-28	0.327795	0.145	0.003	9.36148e-24	Adamts6	0.000239983	0.0374747	0.03	0.003	1	Tuba1a	6.94639e-20	0.2335	1	1	1.40491e-15	Dlc1	1.99888e-22	-0.620408	0.397	0.671	4.04274e-18	Ier5	4.40352e-08	0.467498	0.366	0.149	0.000890613
Nfatc1	1.09411e-05	0.026967	0.019	0	0.209304	Chrnb4	2.38949e-08	0.513292	0.468	0.192	0.00045711	Atp5a1	1.50927e-05	-0.423271	0.979	0.984	0.288724	Tax1bp1	1.25449e-27	-0.682783	0.97	1	2.39983e-23	Smim3	0.000242995	0.0363585	0.03	0.003	1	Otx2	8.31963e-20	-0.245904	0.994	0.999	1.68265e-15	Pcdh15	2.95767e-22	-0.683721	0.37	0.644	5.9819e-18	Eif1	4.45515e-08	0.590143	1	1	0.000901054
Prune2	1.09411e-05	0.026967	0.019	0	0.209304	Ece1	2.51796e-08	0.632847	0.506	0.234	0.000481685	Atp5g1	1.55815e-05	-0.424853	1	0.996	0.298075	Enho	1.68966e-27	0.591559	0.337	0.065	3.23232e-23	Mpp4	0.000255836	-0.331432	0.798	0.842	1	Jund	1.06746e-19	0.290696	0.998	0.999	2.15895e-15	Impg2	5.21077e-22	-0.507028	0.775	0.901	1.05388e-17	Rbp3	4.78618e-08	-0.479769	0.973	1	0.000968005
Gm20616	1.09411e-05	0.026967	0.019	0	0.209304	Adcy2	3.19432e-08	0.18393	0.127	0.012	0.000611074	Slc7a1	1.97722e-05	0.148257	0.104	0.015	0.378241	Atp1a3	1.83615e-27	-0.705417	0.855	0.984	3.51255e-23	Rsrp1	0.00030166	-0.235765	1	0.998	1	Eif4ebp1	1.80939e-19	0.411116	0.238	0.108	3.6595e-15	Kif5a	9.86685e-22	0.179839	0.145	0.023	1.99557e-17	Rorb	5.1129e-08	-0.403487	0.991	1	0.00103408
Tlr13	1.09411e-05	0.026967	0.019	0	0.209304	Rxrg	3.44874e-08	0.415898	0.266	0.068	0.000659745	Zfand4	2.11458e-05	0.12129	0.104	0.015	0.404519	Mfap4	2.77717e-27	0.297929	0.169	0.008	5.31272e-23	Pde6b	0.000309841	-0.247021	0.98	1	1	Zdhhc2	2.93243e-19	-0.334921	0.711	0.784	5.93084e-15	Zfp703	1.06934e-21	0.193382	0.141	0.021	2.16275e-17	Herpud1	5.46698e-08	0.862349	0.384	0.183	0.0011057
Gm38250	1.49176e-05	0.0882101	0.075	0.009	0.285375	Nnat	3.7609e-08	3.38099	0.405	0.171	0.000719461	Camk2n1	2.12356e-05	0.786214	0.583	0.327	0.406237	Fam135b	3.19925e-27	0.369312	0.163	0.007	6.12016e-23	Zfp444	0.000310944	-0.303325	0.828	0.908	1	Nrn1l	3.91784e-19	0.328839	0.213	0.09	7.92383e-15	Atp8b3	1.10901e-21	0.079484	0.057	0.001	2.24297e-17	Trp53i11	5.62949e-08	0.319051	0.259	0.081	0.00113856
Pusl1	1.76409e-05	0.140163	0.132	0.026	0.337471	Samd11	4.24831e-08	-0.642814	0.772	0.956	0.000812702	Mfap4	2.13662e-05	0.080204	0.062	0.005	0.408736	Reep6	3.67116e-27	-0.86538	0.133	0.616	7.02293e-23	6030407O03Rik	0.000314869	0.0144996	0.01	0	1	Dnm3	5.83847e-19	-0.334066	0.784	0.874	1.18083e-14	Abhd14b	1.26597e-21	-0.548001	0.321	0.628	2.56042e-17	Hmgn2	6.33314e-08	-0.327776	1	1	0.00128088
Nanos3	2.61434e-05	0.191492	0.189	0.051	0.500124	Nrcam	4.25847e-08	0.400212	0.291	0.082	0.000814646	Dock8	2.13662e-05	0.080204	0.062	0.005	0.408736	Lhx2	7.42577e-27	0.350143	0.319	0.054	1.42055e-22	Olfml2b	0.000314869	0.0144996	0.01	0	1	Clic1	6.18073e-19	0.340863	0.29	0.146	1.25005e-14	Nos1ap	2.96221e-21	0.218399	0.16	0.029	5.99108e-17	Acsl1	6.59914e-08	-0.457917	0.848	0.935	0.00133468
Galnt17	2.93475e-05	0.0506325	0.038	0.002	0.561419	Ebpl	4.62282e-08	-0.528503	0.886	0.998	0.000884346	Aplp2	2.1611e-05	0.518593	0.896	0.825	0.413419	Chaf1a	1.07435e-26	0.422297	0.259	0.035	2.05524e-22	Cd48	0.000314869	0.0144996	0.01	0	1	Snap25	6.37809e-19	-0.236507	0.999	0.999	1.28997e-14	Pxk	6.31601e-21	0.342696	0.359	0.134	1.27741e-16	Rnf121	6.91099e-08	-0.516704	0.777	0.891	0.00139775
Dnah3	2.93475e-05	0.0506325	0.038	0.002	0.561419	Kcnma1	5.22879e-08	0.211973	0.139	0.016	0.00100027	2025-03-01	2.39058e-05	-0.540625	0.5	0.784	0.457317	Sptb	4.73364e-26	0.304404	0.181	0.013	9.05546e-22	Gm13568	0.000314869	0.0144996	0.01	0	1	Rpl41	1.15606e-18	0.190396	1	1	2.33814e-14	Bend4	7.8053e-21	0.157768	0.111	0.013	1.57862e-16	Rpl26	7.14293e-08	0.331919	1	0.998	0.00144466
Gm26583	2.93475e-05	0.0506325	0.038	0.002	0.561419	Rcvrn	5.83898e-08	-1.42738	0.481	0.706	0.001117	Pde6g	2.43974e-05	-0.558726	0.938	0.989	0.466723	Spats2l	5.70203e-26	0.202389	0.114	0	1.0908e-21	Lrrc55	0.000314869	0.0144996	0.01	0	1	Inpp5f	1.55032e-18	0.325271	0.289	0.148	3.13553e-14	Greb1	9.21931e-21	0.110488	0.073	0.003	1.8646e-16	Gng8	7.34576e-08	0.791379	0.134	0.023	0.00148568
Gm20658	2.93475e-05	0.0506325	0.038	0.002	0.561419	Slc24a3	6.48839e-08	0.399212	0.241	0.058	0.00124123	Fth1	2.82616e-05	0.297579	1	1	0.540645	Dmrtb1	5.70903e-26	0.34606	0.114	0	1.09214e-21	Gm10800	0.000314869	0.0144996	0.01	0	1	H2afz	2.44912e-18	0.293165	0.998	0.996	4.95335e-14	Ntm	9.95652e-21	0.653282	0.599	0.353	2.01371e-16	Plpp3	8.52873e-08	0.41942	0.33	0.125	0.00172494
H2-T24	2.93475e-05	0.0506325	0.038	0.002	0.561419	Smarca1	6.53507e-08	0.218622	0.114	0.009	0.00125016	Fabp7	3.07437e-05	1.04843	0.854	0.676	0.588126	Cadm3	8.48047e-26	0.59778	0.41	0.108	1.62231e-21	6820408C15Rik	0.000314869	0.0144996	0.01	0	1	Nadk2	2.89455e-18	-0.330254	0.651	0.739	5.85423e-14	Nfic	1.72819e-20	-0.634707	0.45	0.706	3.49527e-16	Kcnb1	8.86552e-08	-0.497558	0.759	0.891	0.00179305
C130060C02Rik	2.93475e-05	0.0506325	0.038	0.002	0.561419	Mlf1	6.90236e-08	-0.629145	0.089	0.4	0.00132042	Rom1	3.21339e-05	-0.318561	1	0.997	0.614721	Cplx2	9.26153e-26	0.899287	0.952	0.876	1.77173e-21	Gm14412	0.000314869	0.0144996	0.01	0	1	Nt5e	2.97555e-18	-0.387756	0.496	0.601	6.01806e-14	Prom1	1.89758e-20	-0.549952	0.672	0.814	3.83785e-16	Dyrk2	1.08696e-07	-0.419747	0.768	0.923	0.00219837
Bpifc	2.93487e-05	0.344172	0.038	0.002	0.561441	Ppia	7.70545e-08	0.566366	0.987	0.907	0.00147405	Cox8a	3.21634e-05	-0.353368	1	1	0.615286	Fscn1	1.23494e-25	0.600045	0.277	0.044	2.36243e-21	Gm42695	0.000314869	0.0144996	0.01	0	1	Dyrk2	3.74611e-18	-0.291757	0.935	0.955	7.57651e-14	Camk2d	3.39193e-20	-0.560628	0.599	0.794	6.86019e-16	Tnfrsf12a	1.1435e-07	0.539159	0.143	0.029	0.00231272
Ttc28	3.68294e-05	0.328083	0.302	0.113	0.704546	Ndufa4	8.89776e-08	-0.386386	0.987	1	0.00170214	Ndufv3	3.26961e-05	-0.36902	1	1	0.625476	Rftn2	1.29999e-25	0.191798	0.12	0.001	2.48687e-21	Smad9	0.000314869	0.0288549	0.01	0	1	Lrrc2	3.9525e-18	0.341678	0.359	0.211	7.99393e-14	App	3.51866e-20	0.506657	0.477	0.234	7.11649e-16	Ankrd33b	1.20389e-07	-0.453834	0.723	0.849	0.00243486
Jpx	3.72419e-05	0.315471	0.34	0.136	0.712437	Shisal1	9.10418e-08	0.29633	0.215	0.047	0.00174163	Cltb	3.31754e-05	0.659372	0.812	0.579	0.634646	Klc3	2.61388e-25	-0.7882	0.488	0.855	5.00035e-21	Gm37035	0.000314869	0.0288549	0.01	0	1	Sulf2	7.69553e-18	0.313617	0.283	0.145	1.55642e-13	Slc24a2	4.21333e-20	0.212682	0.141	0.024	8.52145e-16	Dapl1	1.33438e-07	0.26614	0.25	0.079	0.00269878
A930006K02Rik	3.74733e-05	0.0909898	0.075	0.01	0.716864	Nr2e3	9.7097e-08	-0.51035	0.886	1	0.00185747	Bcl2l13	3.48615e-05	0.461252	0.458	0.23	0.666901	Hist2h2be	4.1538e-25	0.301925	0.163	0.009	7.94623e-21	Sh3d19	0.000314869	0.0144996	0.01	0	1	Lyar	1.22451e-17	-0.318692	0.867	0.914	2.47657e-13	Gm42418	1.03833e-19	-0.264705	1	1	2.10002e-15	Slc38a2	1.46424e-07	0.592507	0.938	0.909	0.00296144
Scrn1	3.82345e-05	0.0895993	0.075	0.01	0.731426	Clu	1.31571e-07	0.864864	0.734	0.516	0.00251696	Prph2	4.13914e-05	-0.390874	0.958	0.997	0.791817	Prnp	5.87088e-25	0.801199	0.873	0.676	1.1231e-20	Hjv	0.000314869	0.0144996	0.01	0	1	Arl6ip1	1.29278e-17	-0.246791	0.998	1	2.61465e-13	Rbp3	1.41511e-19	-0.458146	0.87	0.95	2.86205e-15	Creb3l1	1.49235e-07	0.304033	0.116	0.018	0.00301827
Snhg17	4.15135e-05	0.137431	0.132	0.028	0.794153	Tmem246	1.36027e-07	0.287127	0.19	0.037	0.0026022	Tpbgl	4.20509e-05	0.169363	0.104	0.016	0.804434	Lyar	8.47501e-25	-0.922623	0.277	0.685	1.62127e-20	Gpr88	0.000314869	0.0144996	0.01	0	1	Jun	1.41976e-17	0.386333	0.976	0.981	2.87146e-13	Cdk14	2.84413e-19	0.225865	0.176	0.039	5.75225e-15	Atf3	1.52838e-07	0.824168	0.384	0.192	0.00309114
Efcab11	7.46639e-05	0.0710304	0.057	0.006	1	Heatr5a	1.43791e-07	0.388359	0.316	0.103	0.00275072	Pgam1	4.45962e-05	-0.58415	0.854	0.933	0.853125	Ldhb	3.63928e-24	-0.933417	0.271	0.672	6.96194e-20	CK137956	0.000314869	0.0144996	0.01	0	1	Sesn2	2.4548e-17	0.298564	0.207	0.092	4.96483e-13	Homer2	3.66975e-19	0.107994	0.076	0.005	7.42207e-15	Gadd45g	1.62981e-07	0.440249	0.366	0.151	0.00329629
Kcnk4	7.60252e-05	0.0696345	0.057	0.006	1	Irf2bpl	1.44341e-07	0.573201	0.43	0.182	0.00276125	Gm37679	4.91869e-05	0.0297473	0.021	0	0.940946	Dst	7.97773e-24	0.474293	0.289	0.052	1.52614e-19	Gm20707	0.000314869	0.0144996	0.01	0	1	Lpgat1	3.21854e-17	-0.289687	0.888	0.928	6.5095e-13	Pakap.1	3.88097e-19	0.0968325	0.065	0.003	7.84926e-15	Mdk	1.63395e-07	0.274946	0.268	0.09	0.00330466
Map1lc3a	9.66838e-05	0.379463	0.943	0.786	1	Hmgb3	1.4856e-07	0.536785	0.633	0.367	0.00284194	Stom	4.91869e-05	0.0297473	0.021	0	0.940946	Sipa1l1	8.7066e-24	0.349183	0.181	0.016	1.66557e-19	Drc1	0.000314869	0.0288549	0.01	0	1	Map1lc3a	3.47877e-17	0.274753	0.986	0.974	7.03581e-13	Col6a2	3.93655e-19	0.0916892	0.065	0.003	7.96167e-15	Mgarp	1.63764e-07	-0.444685	0.893	0.957	0.00331214
Gm47101	0.000129789	0.155017	0.17	0.048	1	Sms	1.48567e-07	0.572937	0.62	0.35	0.00284208	Slc4a10	4.91869e-05	0.0297473	0.021	0	0.940946	Hivep2	1.24482e-23	0.28047	0.181	0.016	2.38134e-19	Evc	0.000314869	0.0144996	0.01	0	1	Gas5	4.64267e-17	0.296879	0.989	0.986	9.38979e-13	Zfp608	4.45577e-19	0.369628	0.347	0.136	9.01179e-15	Kcnma1	1.64219e-07	0.261484	0.321	0.118	0.00332134
Gm50203	0.000221897	0.093775	0.057	0.007	1	Rho	1.65929e-07	-1.3492	0.215	0.516	0.00317423	Lrp2	4.91869e-05	0.0297473	0.021	0	0.940946	Dusp16	1.45448e-23	0.402581	0.259	0.041	2.78242e-19	Bst1	0.000314869	0.0144996	0.01	0	1	Prom1	5.09548e-17	-0.239444	0.991	0.999	1.03056e-12	Emc9	4.5188e-19	0.205711	0.164	0.034	9.13927e-15	Csrp2	1.66e-07	0.233464	0.214	0.061	0.00335735
Adgrl3	0.000244451	0.115916	0.113	0.025	1	Col22a1	1.76119e-07	0.0885367	0.063	0	0.00336916	Ttc30a2	4.91869e-05	0.0297473	0.021	0	0.940946	Prcd	1.58784e-23	-0.658976	0.873	0.987	3.03754e-19	Tlr1	0.000314869	0.0144996	0.01	0	1	Dync1i2	5.37142e-17	-0.250479	0.998	0.998	1.08637e-12	Ndrg1	4.85335e-19	-0.475172	0.805	0.89	9.8159e-15	Basp1	1.7259e-07	0.483767	0.911	0.801	0.00349064
Pot1b	0.00024894	0.114549	0.113	0.025	1	Ffar4	1.76119e-07	0.0885367	0.063	0	0.00336916	Spi1	4.91869e-05	0.0297473	0.021	0	0.940946	Gprin3	2.98136e-23	0.45501	0.38	0.095	5.70335e-19	C330024D21Rik	0.000314869	0.0288549	0.01	0	1	Ptprn	6.77344e-17	0.548883	0.262	0.139	1.36993e-12	Palld	5.11845e-19	0.258376	0.164	0.035	1.03521e-14	Fnbp1l	2.28492e-07	0.272372	0.33	0.127	0.00462125
AC166172.1	0.000251326	0.191451	0.189	0.06	1	Pik3ap1	1.76119e-07	0.0885367	0.063	0	0.00336916	Tyro3	4.91869e-05	0.0297473	0.021	0	0.940946	Pex5l	3.81381e-23	-0.829072	0.313	0.713	7.29581e-19	Hpse	0.000314869	0.0144996	0.01	0	1	Ankrd33	1.34063e-16	-0.365877	0.41	0.541	2.71143e-12	Nap1l1	6.86943e-19	-0.436777	0.908	0.959	1.38934e-14	Hcn1	2.38464e-07	-0.449176	0.955	0.984	0.00482293
Slc27a3	0.000275518	0.0492311	0.038	0.003	1	Pdlim3	1.76493e-07	0.622486	0.228	0.056	0.00337631	Car13	4.91869e-05	0.0297473	0.021	0	0.940946	Cdh13	4.65154e-23	0.255284	0.139	0.006	8.89839e-19	Fzd9	0.000314869	0.0144996	0.01	0	1	Tcstv3	1.47556e-16	0.420987	0.104	0.027	2.98431e-12	Arhgap22	9.17937e-19	0.0690297	0.05	0.001	1.85653e-14	Rps26	2.80725e-07	0.403959	1	1	0.00567767
Gm12898	0.000275518	0.0492311	0.038	0.003	1	Ampd2	2.07071e-07	0.225301	0.089	0.005	0.00396126	Smad9	4.91869e-05	0.0297473	0.021	0	0.940946	Atp1b1	4.96866e-23	0.406419	0.235	0.034	9.50504e-19	Gm16499.1	0.000314869	0.0144996	0.01	0	1	Ppia	1.60781e-16	0.214562	1	1	3.2518e-12	Gsg1l	9.1951e-19	0.154409	0.118	0.017	1.85971e-14	Mpp4	2.9498e-07	-0.479804	0.768	0.952	0.00596598
Tnfrsf4	0.000275518	0.0492311	0.038	0.003	1	Cabp5	2.11178e-07	0.344354	0.089	0.005	0.00403984	Tspan2os	4.91869e-05	0.0297473	0.021	0	0.940946	Tle1	6.75691e-23	0.305332	0.223	0.029	1.2926e-18	Adamts9	0.000314869	0.0144996	0.01	0	1	Rps5	2.47416e-16	0.205015	1	0.999	5.00399e-12	Crhr1	9.45649e-19	0.0984994	0.057	0.002	1.91257e-14	Slc7a1	3.36224e-07	0.434557	0.259	0.095	0.00680014
2310074N15Rik	0.000275518	0.0492311	0.038	0.003	1	Gal3st4	2.13077e-07	0.132437	0.089	0.005	0.00407616	Col25a1	4.91869e-05	0.0297473	0.021	0	0.940946	Rtl8a	1.09037e-22	1.30082	0.578	0.268	2.08587e-18	C5ar2	0.000314869	0.0144996	0.01	0	1	Ttyh1	3.52839e-16	-0.273029	0.834	0.906	7.13616e-12	Arid5b	9.47985e-19	0.356309	0.328	0.122	1.9173e-14	Cntfr	3.36559e-07	0.30718	0.205	0.061	0.0068069
Gm17529	0.000275518	0.0492311	0.038	0.003	1	Mgarp	2.16408e-07	-0.563484	0.797	0.942	0.00413988	Gbp5	4.91869e-05	0.0297473	0.021	0	0.940946	Ank3	1.58566e-22	0.722349	0.512	0.193	3.03336e-18	Gm45169	0.000314869	0.0144996	0.01	0	1	Bex2	4.66123e-16	0.237938	0.961	0.954	9.42734e-12	Gm30524	9.87875e-19	0.168308	0.095	0.01	1.99798e-14	Calm3	3.45832e-07	0.414947	0.929	0.882	0.00699446
Tbc1d22bos	0.000275518	0.0492311	0.038	0.003	1	Marcksl1	2.2373e-07	0.426798	0.456	0.194	0.00427995	4933430I17Rik	4.91869e-05	0.0297473	0.021	0	0.940946	Uqcrq	2.26683e-22	-0.555439	1	0.999	4.33645e-18	Gm44751	0.000314869	0.0144996	0.01	0	1	Susd3	6.24756e-16	-0.32671	0.253	0.395	1.26357e-11	Cadps	1.24519e-18	0.352269	0.286	0.1	2.51841e-14	Nxnl2	3.49784e-07	-0.488643	0.75	0.817	0.00707439
Gm43813	0.000349337	0.0854357	0.075	0.013	1	Lyar	2.50472e-07	-0.62765	0.468	0.734	0.00479153	Adamtsl1	4.91869e-05	0.0297473	0.021	0	0.940946	Samd11	2.36998e-22	-0.792608	0.705	0.939	4.53377e-18	Gm45591	0.000314869	0.0144996	0.01	0	1	Hmox1	6.63644e-16	0.159627	0.106	0.03	1.34222e-11	Bcl11b	1.3084e-18	0.155296	0.107	0.014	2.64623e-14	Vgll4	3.83236e-07	0.314608	0.33	0.131	0.00775096
Zkscan14	0.000359323	0.272495	0.245	0.096	1	Uqcrh	2.67039e-07	-0.398287	0.975	0.986	0.00510845	Col9a2	4.91869e-05	0.0588937	0.021	0	0.940946	Cox7a2	3.17701e-22	-0.526837	1	1	6.07763e-18	Gm15338	0.000314869	0.0288549	0.01	0	1	Rnf121	6.8688e-16	-0.336144	0.784	0.852	1.38921e-11	Pde6g	2.51875e-18	-0.377272	0.969	0.992	5.09417e-14	Ftl1	4.13635e-07	0.410015	1	1	0.00836577
Ipo9	0.000377985	0.228366	0.358	0.167	1	Nkd2	2.68014e-07	0.102243	0.076	0.002	0.00512711	Laptm5	4.91869e-05	0.0297473	0.021	0	0.940946	9530059O14Rik	3.70624e-22	0.302916	0.169	0.015	7.09005e-18	Stk32c	0.000314869	0.0144996	0.01	0	1	Uckl1os	7.50142e-16	-0.329317	0.359	0.502	1.51716e-11	Crabp1	2.93227e-18	0.767533	0.309	0.116	5.93052e-14	Atp2b4	4.50237e-07	0.39028	0.161	0.039	0.00910605
Hectd3	0.000513996	0.154232	0.189	0.063	1	Gramd3	2.83326e-07	0.115758	0.076	0.002	0.00542002	Tmem82	4.91869e-05	0.0588937	0.021	0	0.940946	Ndufb1-ps	5.79414e-22	-0.538285	0.988	0.999	1.10842e-17	Gm45601	0.000314869	0.0144996	0.01	0	1	Rps16	8.47995e-16	0.184996	1	1	1.71507e-11	Cnga1	3.30087e-18	-0.540953	0.668	0.824	6.676e-14	Atp8a2	4.52022e-07	-0.505016	0.366	0.613	0.00914214
1700028K03Rik	0.000634187	0.136067	0.113	0.028	1	Malat1	2.89733e-07	0.567876	1	1	0.0055426	Tnfrsf25	4.91869e-05	0.0297473	0.021	0	0.940946	Lhx4	5.86396e-22	0.317291	0.151	0.01	1.12177e-17	4930579O11Rik	0.000314869	0.0144996	0.01	0	1	Rpl19	9.26471e-16	0.183455	1	1	1.87379e-11	Macf1	8.18156e-18	0.408096	0.553	0.301	1.65472e-13	Xist	4.55442e-07	-0.447382	1	0.996	0.00921131
Bloc1s2	0.000671343	0.238939	0.472	0.255	1	Reep6	3.27852e-07	-0.65981	0.342	0.612	0.0062718	Gm26918	4.91869e-05	0.0297473	0.021	0	0.940946	Kcnj12	9.00671e-22	0.185693	0.102	0.001	1.72298e-17	Wfdc1	0.000314869	0.0144996	0.01	0	1	Epb41l2	9.5216e-16	-0.239245	0.994	0.996	1.92574e-11	Nrl	8.46738e-18	-0.458882	0.821	0.893	1.71253e-13	Psat1	5.05472e-07	0.499086	0.241	0.086	0.0102232
Vash1	0.000674401	0.216994	0.283	0.123	1	Ndufb8	3.29117e-07	-0.400879	0.975	0.998	0.00629601	Bmp3	4.91869e-05	0.0588937	0.021	0	0.940946	Rs1	1.05387e-21	-0.95803	0.44	0.769	2.01605e-17	Gm45833	0.000314869	0.0144996	0.01	0	1	E130310I04Rik	2.07596e-15	-0.354571	0.289	0.424	4.19863e-11	Csmd2	9.15515e-18	0.1148	0.084	0.008	1.85163e-13	Inpp5f	5.83519e-07	0.428793	0.277	0.106	0.0118017
Gm12802	0.000694756	0.48152	0.509	0.318	1	Ppp2r3a	3.48861e-07	0.549373	0.684	0.428	0.00667371	Acacb	4.91869e-05	0.0297473	0.021	0	0.940946	Neurod1	1.28317e-21	-0.634388	0.946	1	2.4547e-17	Icam1	0.000314869	0.0144996	0.01	0	1	Zfp704	2.13997e-15	0.266606	0.547	0.381	4.32809e-11	mt-Atp8	1.10461e-17	0.449586	0.469	0.239	2.23408e-13	Rapgef5	5.88595e-07	-0.461472	0.17	0.421	0.0119043
Msantd3	0.000747114	0.169678	0.245	0.097	1	Nckap5	3.60745e-07	0.193064	0.114	0.012	0.00690105	Ncf1	4.91869e-05	0.0297473	0.021	0	0.940946	Kcnma1	1.49591e-21	0.381732	0.157	0.013	2.86168e-17	Gm28119	0.000314869	0.0144996	0.01	0	1	Xiap	2.32934e-15	-0.271784	0.788	0.853	4.71109e-11	Tax1bp1	1.16952e-17	-0.430402	0.866	0.907	2.36536e-13	Nxnl1	6.05584e-07	-0.569025	0.464	0.647	0.0122479
Fam8a1	0.00075895	0.216049	0.547	0.308	1	Gnb3	3.71153e-07	0.668781	0.987	0.958	0.00710015	Irf5	4.91869e-05	0.0297473	0.021	0	0.940946	Ppia	1.50877e-21	0.698859	0.976	0.924	2.88628e-17	Aqp9	0.000314869	0.0144996	0.01	0	1	Pbdc1	2.49656e-15	0.252698	0.572	0.399	5.0493e-11	Elavl4	1.36084e-17	0.222702	0.153	0.032	2.75229e-13	Glo1	6.14967e-07	-0.365194	1	1	0.0124377
Wdr44	0.000824241	0.167776	0.189	0.066	1	Ndufb1-ps	3.78267e-07	-0.382407	1	1	0.00723625	Vmn1r4	4.91869e-05	0.0297473	0.021	0	0.940946	Pde6c	3.57147e-21	0.240785	0.139	0.008	6.83222e-17	Ddc	0.000314869	0.0288549	0.01	0	1	Herpud1	2.83319e-15	0.320963	0.391	0.247	5.73013e-11	Pou3f1	1.51588e-17	0.117288	0.076	0.006	3.06586e-13	Hsd17b12	7.13241e-07	0.314955	0.509	0.254	0.0144253
Mmab	0.000879192	0.156062	0.208	0.077	1	Cox5b	3.90548e-07	-0.437989	1	1	0.00747119	Dysf	4.91869e-05	0.0297473	0.021	0	0.940946	Atp5h	4.25046e-21	-0.490756	0.994	0.999	8.13114e-17	1700016P03Rik	0.000314869	0.0144996	0.01	0	1	Rpl32	3.08124e-15	0.200984	1	1	6.23181e-11	Reep5	1.80803e-17	0.255075	0.252	0.081	3.65674e-13	Nsg1	7.19526e-07	0.220961	0.196	0.056	0.0145524
Nrxn3	0.000906873	0.154766	0.189	0.066	1	Ndufa1	4.3109e-07	-0.425	0.949	0.993	0.00824676	Rassf4	4.91869e-05	0.0297473	0.021	0	0.940946	Trhde	8.99077e-21	0.171855	0.09	0	1.71993e-16	5530401A14Rik	0.000314869	0.0144996	0.01	0	1	Mxra7	3.22148e-15	0.272764	0.845	0.759	6.51545e-11	Btg2	3.09846e-17	-0.497656	0.653	0.804	6.26663e-13	Meox1	7.69071e-07	0.106347	0.062	0.004	0.0155545
Gsto2	0.000935946	0.0981074	0.094	0.021	1	Aldoa	4.56577e-07	-0.502074	0.975	0.998	0.00873431	Shisa7	4.91869e-05	0.0297473	0.021	0	0.940946	Kcnb1	9.40609e-21	-0.737813	0.56	0.861	1.79939e-16	Krt19	0.000314869	0.0144996	0.01	0	1	Rps26	3.26014e-15	0.212102	1	0.999	6.59362e-11	Cdh4	3.15175e-17	0.293619	0.286	0.102	6.37441e-13	Shb	8.18164e-07	0.0918	0.062	0.004	0.0165474
Snx3	0.000971254	0.274719	0.736	0.537	1	E130310I04Rik	4.62122e-07	-0.582895	0.089	0.374	0.0088404	Isoc2b	4.91869e-05	0.0297473	0.021	0	0.940946	Tnrc18	1.61128e-20	0.45501	0.355	0.095	3.08237e-16	Rsad2	0.000314869	0.0288549	0.01	0	1	Negr1	5.04293e-15	-0.255209	0.806	0.867	1.01993e-10	Jarid2	3.27213e-17	-0.550853	0.531	0.721	6.61789e-13	Mtss1	8.27266e-07	0.258962	0.304	0.116	0.0167315
Fam204a	0.00101242	0.30523	0.925	0.754	1	Rrp1b	4.66317e-07	-0.589382	0.215	0.505	0.00892065	Vmn1r168	4.91869e-05	0.0588937	0.021	0	0.940946	Thsd7a	3.48255e-20	0.319121	0.169	0.018	6.66211e-16	Dio3os	0.000314869	0.0430687	0.01	0	1	Trib1	7.20708e-15	-0.363875	0.541	0.627	1.45763e-10	Snap25	3.2844e-17	-0.487308	0.79	0.862	6.6427e-13	Gm4258	9.22608e-07	-0.461382	0.732	0.866	0.0186597
Scrt1	0.00105168	0.0799028	0.075	0.015	1	Scg3	5.10219e-07	0.548445	0.519	0.28	0.0097605	Cebpa	4.91869e-05	0.0297473	0.021	0	0.940946	Cox6a1	3.52399e-20	-0.536292	0.994	0.996	6.74139e-16	Hist1h2bf	0.000314869	0.0144996	0.01	0	1	Rpl17	8.54368e-15	0.181304	1	1	1.72796e-10	Tnrc18	4.57342e-17	0.275761	0.279	0.099	9.24975e-13	Pdlim7	9.30716e-07	0.744326	0.438	0.253	0.0188237
Msantd4	0.00113153	0.27432	0.528	0.304	1	Tafa5	5.20356e-07	0.267761	0.291	0.091	0.00995442	Cd33	4.91869e-05	0.0297473	0.021	0	0.940946	Slc1a2	3.8095e-20	0.685007	0.928	0.84	7.28757e-16	Gm2974	0.000314869	0.0144996	0.01	0	1	Cldn23	1.23062e-14	0.130115	0.076	0.016	2.48892e-10	Cacna1g	5.37605e-17	0.135667	0.092	0.011	1.08731e-12	Hspa4l	9.45495e-07	-0.434032	0.786	0.905	0.0191226
Cd8a	0.00116017	0.166382	0.057	0.009	1	Galnt14	5.34283e-07	0.25182	0.215	0.051	0.0102208	Gfy	4.91869e-05	0.0297473	0.021	0	0.940946	Ndufb9	4.70106e-20	-0.48727	1	0.999	8.99313e-16	Gm8237	0.000314869	0.0144996	0.01	0	1	Cd47	1.33684e-14	0.318982	0.957	0.913	2.70375e-10	Dclk1	9.24389e-17	0.28767	0.225	0.07	1.86958e-12	Rps27	9.64144e-07	0.330953	1	1	0.0194998
Zfp975	0.00120658	0.0668466	0.057	0.009	1	Wwtr1	5.50902e-07	0.317127	0.278	0.084	0.0105388	Gm44718	4.91869e-05	0.0297473	0.021	0	0.940946	Hyal2	5.09075e-20	0.26977	0.199	0.027	9.73861e-16	Gm47601	0.000314869	0.0144996	0.01	0	1	Hnrnpu	1.33982e-14	-0.232551	0.998	0.998	2.7098e-10	Trerf1	9.32772e-17	0.162095	0.149	0.032	1.88653e-12	Dhx32	9.65304e-07	0.324672	0.429	0.21	0.0195233
Kalrn	0.00120658	0.0668466	0.057	0.009	1	Epb41l3	5.93482e-07	0.404519	0.43	0.185	0.0113533	Gm44532	4.91869e-05	0.0297473	0.021	0	0.940946	Abraxas2	6.06643e-20	0.606022	0.578	0.262	1.16051e-15	Galnt15	0.000314869	0.0288549	0.01	0	1	Ndrg1	1.38791e-14	-0.234766	0.998	0.996	2.80706e-10	Unc119	1.06329e-16	-0.343096	0.977	0.997	2.15051e-12	Rps19	1.02971e-06	0.318141	1	1	0.0208258
Baiap2l1	0.00121228	0.0738263	0.038	0.004	1	Plekha1	7.73952e-07	0.501251	0.658	0.39	0.0148057	1700011D18Rik	4.91869e-05	0.0297473	0.021	0	0.940946	Ackr1	6.23047e-20	0.230064	0.193	0.025	1.19189e-15	Gm49083	0.000314869	0.0144996	0.01	0	1	Junb	1.76256e-14	0.408471	0.815	0.763	3.56477e-10	Pde10a	1.38961e-16	0.15365	0.103	0.015	2.81049e-12	Rpl10	1.0509e-06	0.356295	1	0.98	0.0212544
Gm37864	0.00124238	0.0478311	0.038	0.004	1	Kalrn	8.70789e-07	0.122407	0.101	0.009	0.0166582	Isg20	4.91869e-05	0.0297473	0.021	0	0.940946	Atp5g3	6.91292e-20	-0.477646	0.988	1	1.32244e-15	2810457G06Rik	0.000314869	0.0144996	0.01	0	1	Impdh1	1.84098e-14	-0.242624	0.924	0.958	3.72338e-10	Ntrk2	1.42435e-16	0.234231	0.141	0.03	2.88074e-12	Rpl28	1.06848e-06	0.289861	1	1	0.02161
Mme	0.00124238	0.0478311	0.038	0.004	1	Lmo2	8.8555e-07	0.372169	0.291	0.096	0.0169406	Ppfibp2	4.91869e-05	0.0297473	0.021	0	0.940946	Rasa2	1.07735e-19	0.671082	0.506	0.2	2.06097e-15	Gm49086	0.000314869	0.0144996	0.01	0	1	2410006H16Rik	1.85991e-14	0.451197	0.858	0.821	3.76167e-10	Slc4a7	2.57302e-16	-0.522097	0.496	0.702	5.20393e-12	Rpl18	1.08706e-06	0.290393	1	1	0.0219857
Clcn1	0.00124238	0.0478311	0.038	0.004	1	Maf	9.11774e-07	0.375074	0.342	0.119	0.0174422	Gm44763	4.91869e-05	0.0297473	0.021	0	0.940946	Ndufa1	1.25155e-19	-0.537806	0.91	0.986	2.39422e-15	Slc39a4	0.000314869	0.0288549	0.01	0	1	Slc7a1	1.88917e-14	0.273795	0.205	0.1	3.82085e-10	Gm45159	2.8825e-16	-0.456342	0.111	0.36	5.82985e-12	Nlk	1.25693e-06	-0.411278	0.982	0.991	0.0254213
Vmn2r29	0.00124238	0.0478311	0.038	0.004	1	Impg1	1.01752e-06	-0.501602	0.101	0.395	0.0194651	Gm2814	4.91869e-05	0.0297473	0.021	0	0.940946	Casp3	2.0601e-19	0.585286	0.38	0.114	3.94096e-15	Sec14l5	0.000314869	0.0144996	0.01	0	1	Tnfrsf12a	1.95311e-14	0.309568	0.118	0.039	3.95015e-10	Zranb1	2.96448e-16	-0.497973	0.676	0.801	5.99567e-12	Hif1a	1.25858e-06	-0.372846	0.991	0.998	0.0254548
Adgra2	0.00124238	0.0478311	0.038	0.004	1	Osbp2	1.09092e-06	-0.553597	0.051	0.313	0.0208694	Proz	4.91869e-05	0.0297473	0.021	0	0.940946	Lmo2	2.39764e-19	0.497147	0.349	0.097	4.58669e-15	Grin2a	0.000314869	0.0144996	0.01	0	1	Hmgn1	2.8614e-14	0.169904	1	1	5.78718e-10	Sptbn1	3.15217e-16	0.430237	0.496	0.276	6.37526e-12	Eif2s2	1.3072e-06	0.508886	0.982	0.971	0.0264382
Csgalnact1	0.00124238	0.0478311	0.038	0.004	1	Celf3	1.09702e-06	0.479153	0.519	0.264	0.0209859	Adam32	4.91869e-05	0.0297473	0.021	0	0.940946	Ptms	2.78826e-19	0.535734	0.988	0.979	5.33393e-15	Emp2	0.000314869	0.0144996	0.01	0	1	Fam161a	3.3388e-14	-0.289032	0.746	0.811	6.75272e-10	Lima1	3.49631e-16	0.214609	0.13	0.025	7.07129e-12	Smim14	1.45494e-06	0.468446	0.625	0.401	0.0294263
Ubash3b	0.00124238	0.0478311	0.038	0.004	1	4930578M01Rik	1.13523e-06	0.380273	0.316	0.114	0.021717	Chrnb3	4.91869e-05	0.0297473	0.021	0	0.940946	Csrp2	2.99364e-19	0.3092	0.211	0.034	5.72684e-15	AU015336	0.000314869	0.0144996	0.01	0	1	Impg1	3.44805e-14	-0.303716	0.306	0.442	6.97367e-10	Col25a1	3.66644e-16	0.118057	0.053	0.002	7.41537e-12	Car2	1.47047e-06	-0.408439	0.795	0.905	0.0297402
Igf1	0.00124238	0.0478311	0.038	0.004	1	Rtl8a	1.2033e-06	1.21769	0.519	0.301	0.0230192	Slc7a2	4.91869e-05	0.0297473	0.021	0	0.940946	Ppp2r5c	3.28684e-19	-0.781229	0.476	0.775	6.28773e-15	Vgll3	0.000314869	0.0288549	0.01	0	1	Rpl35a	3.81961e-14	0.202265	1	1	7.72515e-10	Meis2	3.67747e-16	-0.557768	0.29	0.536	7.43767e-12	Bud31	1.47459e-06	0.377893	0.616	0.376	0.0298236
1700034I23Rik	0.00125774	0.0464325	0.038	0.004	1	Adrb1	1.42484e-06	0.526875	0.62	0.35	0.0272572	Gm31172	4.91869e-05	0.0297473	0.021	0	0.940946	Atp5k	3.39462e-19	-0.603816	0.97	0.991	6.49392e-15	Arap3	0.000314869	0.0144996	0.01	0	1	Atf5	4.03598e-14	0.311884	0.262	0.148	8.16276e-10	Ddhd2	3.7761e-16	0.282216	0.267	0.095	7.63716e-12	Cited2	1.62208e-06	-0.412656	0.804	0.914	0.0328066
Gm13031	0.00125774	0.0464325	0.038	0.004	1	Thsd7a	1.48837e-06	0.164668	0.114	0.014	0.0284725	Mmp2	4.91869e-05	0.0297473	0.021	0	0.940946	Hsbp1l1	3.66057e-19	-0.715791	0.09	0.464	7.00267e-15	Lox	0.000314869	0.0144996	0.01	0	1	Eif2s2	4.23112e-14	0.383959	0.991	0.986	8.55745e-10	Irx3os	4.05735e-16	0.0540398	0.038	0	8.20599e-12	Rgs16	1.65354e-06	0.158069	0.116	0.022	0.0334428
Trpv2	0.00125774	0.0464325	0.038	0.004	1	Epb41	1.64577e-06	-0.503098	0.886	0.977	0.0314836	Gm15898	4.91869e-05	0.0297473	0.021	0	0.940946	Rho	3.75556e-19	-1.88987	0.163	0.521	7.18439e-15	Gm4841	0.000314869	0.0144996	0.01	0	1	Tcstv1	6.79743e-14	0.115622	0.065	0.011	1.37478e-09	Srgap3	4.77434e-16	0.364593	0.408	0.196	9.65611e-12	Rps10	1.70354e-06	0.260391	1	1	0.034454
Gm5141	0.00125774	0.0464325	0.038	0.004	1	Uqcr11	1.79785e-06	-0.380554	1	1	0.0343929	Gm45894	4.91869e-05	0.0297473	0.021	0	0.940946	Rtbdn	4.32485e-19	-0.85744	0.253	0.604	8.27344e-15	Fam178b	0.000314869	0.0144996	0.01	0	1	Btf3	7.59663e-14	0.199794	0.993	0.992	1.53642e-09	Slc6a17	6.30652e-16	0.0725975	0.05	0.002	1.27549e-11	Casz1	1.71962e-06	-0.424156	0.973	0.996	0.0347793
Trip10	0.00128092	0.118448	0.132	0.039	1	Pard3	1.83217e-06	0.40445	0.329	0.126	0.0350495	St14	4.91869e-05	0.0297473	0.021	0	0.940946	Mafa	4.39576e-19	0.242487	0.102	0.003	8.4091e-15	Mybph	0.000314869	0.0144996	0.01	0	1	Frmd4b	1.07072e-13	-0.224418	0.881	0.918	2.16554e-09	Cacna2d1	7.31279e-16	0.291438	0.26	0.093	1.47901e-11	Sbk1	1.78146e-06	0.370806	0.491	0.26	0.0360299
Cyp4f13	0.00129243	0.19932	0.17	0.059	1	Mettl9	2.05946e-06	0.494106	0.658	0.418	0.0393974	AI593442	4.91869e-05	0.0297473	0.021	0	0.940946	Maf	4.92299e-19	0.5587	0.313	0.079	9.41767e-15	Gm14033	0.000314869	0.0144996	0.01	0	1	Wdr17	1.14392e-13	-0.30496	0.405	0.529	2.31358e-09	Trim7	7.42263e-16	0.0742663	0.042	0.001	1.50123e-11	Rpl32	1.85567e-06	0.340107	1	1	0.0375309
Fam221a	0.00131511	0.156865	0.151	0.049	1	H3f3b	2.13424e-06	0.258036	1	1	0.040828	Gldn	4.91869e-05	0.0588937	0.021	0	0.940946	Dpysl3	6.0126e-19	-0.579014	0.831	0.966	1.15021e-14	Gm826	0.000314869	0.0144996	0.01	0	1	Marcks	1.16904e-13	0.235538	0.989	0.982	2.36439e-09	Pim1	7.5739e-16	0.145448	0.111	0.019	1.53182e-11	Ndfip1	1.86101e-06	-0.322427	1	1	0.0376389
Gm35215	0.00133875	0.095362	0.094	0.022	1	Clvs1	2.13578e-06	0.212174	0.241	0.068	0.0408574	Sh2d7	4.91869e-05	0.0297473	0.021	0	0.940946	Gpx4	6.48436e-19	-0.458116	0.988	1	1.24046e-14	Rab25	0.000314869	0.0144996	0.01	0	1	Rps10	1.38179e-13	0.173663	1	1	2.79468e-09	Pitpnm3	7.75846e-16	-0.484175	0.24	0.488	1.56915e-11	Irf2bpl	1.88128e-06	0.302961	0.536	0.283	0.0380488
Fabp7	0.00145948	0.499806	0.868	0.73	1	Asrgl1	2.38335e-06	-0.429478	0.025	0.269	0.0455935	Insyn1	4.91869e-05	0.0297473	0.021	0	0.940946	Abhd2	7.51674e-19	0.242282	0.127	0.008	1.43795e-14	Gimd1	0.000314869	0.0144996	0.01	0	1	Vopp1	1.38324e-13	-0.236632	0.874	0.913	2.7976e-09	Tle3	9.6534e-16	0.193052	0.16	0.039	1.9524e-11	Crb1	1.90148e-06	-0.468932	0.232	0.484	0.0384574
Rcvrn	0.00151503	-0.726692	0.566	0.759	1	Rtn4	2.70731e-06	-0.426349	0.886	0.965	0.0517908	Gm47271	4.91869e-05	0.0297473	0.021	0	0.940946	Ccdc136	9.23484e-19	1.3433	0.458	0.183	1.76663e-14	B230112J18Rik	0.000314869	0.0144996	0.01	0	1	Fau	1.39915e-13	0.173036	1	1	2.82978e-09	Tead1	1.60225e-15	0.299608	0.385	0.175	3.24054e-11	Rps28	1.99011e-06	0.264936	1	1	0.0402501
Mtfmt	0.00155891	0.119796	0.132	0.04	1	Rorb	2.83537e-06	-0.3997	0.848	0.956	0.0542406	Gm19569	4.91869e-05	0.0297473	0.021	0	0.940946	Cox5b	9.2901e-19	-0.506844	0.988	0.998	1.7772e-14	Gm36328	0.000314869	0.0144996	0.01	0	1	Basp1	1.45444e-13	0.294869	0.811	0.749	2.9416e-09	Sox11	1.65776e-15	0.507523	0.45	0.247	3.35283e-11	Chchd3	2.00028e-06	-0.4271	0.598	0.751	0.0404557
Crtac1	0.00163134	0.172464	0.245	0.104	1	Ptprm	3.06621e-06	0.0712587	0.051	0	0.0586565	Spsb4	4.91869e-05	0.0297473	0.021	0	0.940946	Asph	1.43997e-18	0.470717	0.488	0.191	2.75467e-14	Olfr976	0.000314869	0.0430687	0.01	0	1	Ptprg	1.81563e-13	0.190971	0.223	0.113	3.67211e-09	Ckb	1.82833e-15	-0.323546	0.989	0.998	3.6978e-11	Chac1	2.05514e-06	0.345525	0.17	0.048	0.0415652
Dnpep	0.00164933	0.329658	0.642	0.443	1	Pkdcc	3.06621e-06	0.0712587	0.051	0	0.0586565	Sema3b	4.91869e-05	0.0297473	0.021	0	0.940946	Lrp8	1.71154e-18	0.772773	0.548	0.251	3.27418e-14	Jhy	0.000314869	0.0144996	0.01	0	1	Tmem237	1.90517e-13	-0.228448	0.959	0.976	3.8532e-09	Zbtb16	2.0969e-15	0.0805145	0.057	0.003	4.24099e-11	Eif3b	2.16396e-06	0.821104	0.518	0.317	0.0437662
Clu	0.00173714	0.606321	0.623	0.45	1	Mtnr1a	3.06662e-06	0.10561	0.051	0	0.0586644	4930535L15Rik	4.91869e-05	0.0588937	0.021	0	0.940946	Cox7c	1.72785e-18	-0.449559	0.994	1	3.30538e-14	Slc6a20a	0.000314869	0.0288549	0.01	0	1	Zmiz1	1.95257e-13	0.259642	0.634	0.512	3.94908e-09	Tbc1d16	2.37462e-15	0.243021	0.233	0.078	4.80267e-11	Lhx2	2.25294e-06	0.208963	0.232	0.079	0.0455658
Ehmt2	0.00178627	0.218137	0.415	0.224	1	Nr2e1	3.06662e-06	0.122484	0.051	0	0.0586644	Rgs17	4.91869e-05	0.0297473	0.021	0	0.940946	Elovl6	1.79318e-18	0.467122	0.416	0.138	3.43035e-14	Slc16a11	0.000314869	0.0144996	0.01	0	1	Prmt8	2.0535e-13	0.250607	0.419	0.278	4.1532e-09	Tet1	2.58833e-15	0.29755	0.305	0.123	5.23489e-11	Gm45159	2.59654e-06	-0.635673	0.411	0.608	0.052515
Calm1	0.0018245	0.296265	1	0.969	1	Pcdh8	3.06662e-06	0.0885367	0.051	0	0.0586644	Slc16a10	4.91869e-05	0.0297473	0.021	0	0.940946	Nptx1	1.8771e-18	0.509367	0.44	0.152	3.5909e-14	Gm50128	0.000314869	0.0144996	0.01	0	1	Rpl13	2.20683e-13	0.169436	1	1	4.46332e-09	Mir124-2hg	3.04425e-15	-0.458762	0.744	0.849	6.157e-11	hZic3	2.77783e-06	0.261942	0.134	0.03	0.0561815
Tpt1	0.00194868	0.176441	1	1	1	Cplx1	3.09752e-06	0.0988843	0.076	0.005	0.0592556	9030612E09Rik	4.91869e-05	0.0297473	0.021	0	0.940946	Ccdc88c	2.92662e-18	0.196422	0.145	0.014	5.59863e-14	Tnk2os	0.000314869	0.0144996	0.01	0	1	Pcsk2	2.34202e-13	0.348287	0.461	0.332	4.73674e-09	Flywch1	3.70951e-15	0.24844	0.286	0.111	7.50249e-11	Dync1i2	2.95933e-06	-0.340977	0.991	0.998	0.0598524
Fis1	0.00207359	0.29274	0.906	0.806	1	Nog	3.09752e-06	0.0988843	0.076	0.005	0.0592556	Lilrb4a	4.91869e-05	0.0297473	0.021	0	0.940946	Armh4	3.32641e-18	0.64466	0.464	0.182	6.36343e-14	Gm15479	0.000314869	0.0144996	0.01	0	1	Rps15a	2.58553e-13	0.160927	1	1	5.22923e-09	Rnf220	4.00096e-15	0.326252	0.393	0.19	8.09194e-11	Reep6	3.0666e-06	-0.512235	0.348	0.561	0.0620219
Ciao1	0.00210597	0.244373	0.434	0.251	1	Cox7c	3.14048e-06	-0.335666	1	1	0.0600774	Pald1	4.91869e-05	0.0297473	0.021	0	0.940946	Ffar4	3.49899e-18	0.124806	0.078	0	6.69356e-14	Kcna3	0.000314869	0.0144996	0.01	0	1	Cacnb2	2.79905e-13	-0.284826	0.314	0.443	5.66108e-09	Asxl3	4.12053e-15	0.150264	0.118	0.023	8.33377e-11	Ankrd33	3.1013e-06	-0.46157	0.241	0.489	0.0627238
Rho	0.00221137	-0.884855	0.358	0.548	1	Cpe	3.25974e-06	-0.557935	0.544	0.776	0.0623588	Ggt5	4.91869e-05	0.0297473	0.021	0	0.940946	Mtnr1a	3.499e-18	0.132755	0.078	0	6.69359e-14	Olfr975	0.000314869	0.0144996	0.01	0	1	Tub	2.97897e-13	-0.314516	0.621	0.673	6.02497e-09	Meg3	4.19866e-15	0.828826	0.58	0.378	8.49179e-11	Ddit3	3.87604e-06	0.671241	0.545	0.355	0.0783929
Rnf182	0.00230053	0.0654548	0.057	0.01	1	Rps21	3.61675e-06	-0.281986	1	1	0.0691885	Tspear	4.91869e-05	0.0588937	0.021	0	0.940946	H3f3b	3.79181e-18	0.344207	1	1	7.25373e-14	Gm11541	0.000314869	0.0288549	0.01	0	1	Gadd45b	3.0969e-13	0.32342	0.408	0.275	6.26349e-09	Cryl1	6.91111e-15	0.126575	0.092	0.013	1.39777e-10	Rpl35a	3.91333e-06	0.343357	1	0.998	0.0791471
Cers2	0.00231516	0.149596	0.208	0.084	1	Epha5	3.6707e-06	0.769308	0.734	0.584	0.0702204	Onecut3	4.91869e-05	0.0297473	0.021	0	0.940946	E130310I04Rik	3.88565e-18	-0.660874	0.09	0.458	7.43326e-14	Cartpt	0.000315107	0.139288	0.081	0.022	1	Rps7	3.10907e-13	0.170041	1	1	6.2881e-09	Gngt2	8.65505e-15	-0.341328	0.973	0.987	1.75048e-10	Wfdc2	3.91487e-06	0.721432	0.241	0.091	0.0791782
1700030K09Rik	0.00233692	0.127553	0.151	0.052	1	Unc80	4.21207e-06	0.50365	0.62	0.4	0.0805769	Matk	4.91869e-05	0.0297473	0.021	0	0.940946	Cdkn1b	4.09643e-18	0.645333	0.735	0.452	7.83647e-14	Nedd4	0.00031751	-0.203944	1	1	1	Ttc28	3.15557e-13	0.2744	0.908	0.855	6.38214e-09	Mak	9.9267e-15	-0.470512	0.397	0.625	2.00768e-10	Ugp2	4.40366e-06	0.28911	0.25	0.095	0.0890639
Tcerg1	0.00244995	0.385066	0.528	0.337	1	Plekhg1	4.25482e-06	0.102243	0.063	0.002	0.0813947	Fhl4	4.91869e-05	0.0297473	0.021	0	0.940946	Naa80	4.56844e-18	0.409307	0.289	0.071	8.73943e-14	Gm45159	0.00031778	-0.412398	0.636	0.732	1	Pou2f1	3.23733e-13	-0.287607	0.196	0.319	6.54749e-09	Rorb	1.03501e-14	-0.402016	0.878	0.965	2.0933e-10	Ppargc1b	4.65266e-06	-0.483925	0.232	0.457	0.0941001
Ccnb1ip1	0.00247102	0.081284	0.075	0.017	1	Prickle2	4.29968e-06	0.0851698	0.063	0.002	0.0822528	Myo1a	4.91869e-05	0.0297473	0.021	0	0.940946	Brinp2	4.60003e-18	0.172016	0.108	0.005	8.79986e-14	Lztfl1	0.000339806	-0.294197	0.838	0.922	1	Ftl1	3.36145e-13	0.182456	1	1	6.79854e-09	Pde6b	1.24937e-14	-0.447	0.691	0.815	2.52684e-10	Nars	5.02855e-06	0.55245	0.893	0.832	0.101702
3110001I22Rik	0.00247102	0.081284	0.075	0.017	1	Kif26a	4.29968e-06	0.0851698	0.063	0.002	0.0822528	Tcf7	4.91869e-05	0.0297473	0.021	0	0.940946	Lrrc38	5.0354e-18	0.140989	0.108	0.005	9.63272e-14	Bin1	0.000369408	-0.270683	0.919	0.956	1	Clic4	3.45773e-13	0.302948	0.284	0.167	6.99327e-09	Klf9	1.54534e-14	-0.494138	0.595	0.745	3.12545e-10	Arl6ip1	5.46143e-06	-0.283781	1	1	0.110457
Rnf165	0.00254535	0.258841	0.34	0.177	1	Acadvl	4.46439e-06	-0.458936	0.165	0.432	0.0854038	Fstl4	4.91869e-05	0.0297473	0.021	0	0.940946	Ptma	5.29234e-18	0.630352	1	0.992	1.01242e-13	A2m	0.000380035	0.211925	0.162	0.068	1	Gm21818	4.10951e-13	0.183465	0.078	0.019	8.31149e-09	Shb	1.59292e-14	0.0621051	0.046	0.002	3.22167e-10	Tsix	5.46992e-06	-0.46817	0.795	0.887	0.110629
Tmem245	0.00277329	0.175672	0.377	0.202	1	Chac1	4.48914e-06	0.112407	0.063	0.002	0.0858772	Rasd1	4.91869e-05	0.0297473	0.021	0	0.940946	Ndufv3	5.39026e-18	-0.442191	0.994	1	1.03116e-13	AI854703	0.000416241	0.0459775	0.04	0.006	1	Osgep	4.52302e-13	-0.279793	0.629	0.718	9.1478e-09	Clstn2	1.69557e-14	0.0796823	0.057	0.004	3.4293e-10	Rcn2	5.52918e-06	0.374559	0.411	0.208	0.111828
Cenpv	0.00287329	0.185042	0.226	0.098	1	Dpysl5	4.53676e-06	0.0818108	0.063	0.002	0.0867882	Kcnj12	4.91869e-05	0.0297473	0.021	0	0.940946	Slc24a2	5.56533e-18	0.161319	0.108	0.005	1.06465e-13	Mrps30	0.000426828	0.226317	0.374	0.221	1	Prdx1	4.55814e-13	0.214843	0.934	0.905	9.21883e-09	Fry	2.09942e-14	0.155913	0.118	0.024	4.24608e-10	Ttc3	5.88315e-06	0.383654	0.973	0.939	0.118987
Gm15969	0.00287907	0.131558	0.132	0.043	1	Prkn	4.70389e-06	0.170085	0.152	0.03	0.0899855	Tekt1	4.91869e-05	0.0297473	0.021	0	0.940946	Hsp90aa1	6.06503e-18	-0.454279	0.994	1	1.16024e-13	Ctnna2	0.000428475	0.207553	0.162	0.068	1	Slc7a5	4.69487e-13	0.335045	0.341	0.219	9.49537e-09	Gnb4	2.52802e-14	0.125819	0.111	0.021	5.11293e-10	Six6	5.91017e-06	0.338681	0.473	0.254	0.119533
Rpa2	0.00291623	0.161256	0.189	0.075	1	Fam107b	5.03611e-06	0.327262	0.494	0.238	0.0963408	Efcab5	4.91869e-05	0.0297473	0.021	0	0.940946	Fzd2	6.36009e-18	0.187361	0.127	0.009	1.21669e-13	Hnrnpa3	0.000460776	-0.252703	0.98	0.99	1	Cadm1	4.75901e-13	-0.246742	0.96	0.977	9.6251e-09	Prc1	2.95428e-14	0.145481	0.099	0.017	5.97503e-10	Tal2	5.99237e-06	0.415471	0.116	0.025	0.121196
Gm16196	0.00292158	0.162084	0.226	0.097	1	Ank3	5.23737e-06	0.418541	0.38	0.166	0.100191	Gm11523	4.91869e-05	0.0297473	0.021	0	0.940946	Pcp4l1	6.56673e-18	0.35816	0.084	0.001	1.25622e-13	Pnn	0.000499847	-0.287152	0.919	0.939	1	Tmem158	4.97658e-13	0.347432	0.546	0.386	1.00651e-08	Kcna5	3.27775e-14	0.10561	0.08	0.01	6.62926e-10	Acbd6	6.44764e-06	0.26871	0.25	0.097	0.130404
Lrrc14	0.00294926	0.166811	0.208	0.087	1	Atp5md	5.28466e-06	-0.343887	1	0.998	0.101096	Erbb2	4.91869e-05	0.0297473	0.021	0	0.940946	Gng8	6.67852e-18	0.33081	0.084	0.001	1.2776e-13	Ndrg1	0.000507207	-0.209963	1	0.998	1	Eif2ak3	5.14447e-13	0.289078	0.277	0.163	1.04047e-08	Vstm2l	4.21878e-14	0.149357	0.137	0.032	8.53249e-10	Mfge8	7.2187e-06	0.412982	0.304	0.133	0.145998
Nfkbia	0.00311163	0.258953	0.547	0.348	1	Pam	5.31715e-06	0.132246	0.114	0.016	0.101717	E130111B04Rik	4.91869e-05	0.0297473	0.021	0	0.940946	Atp5l	6.72397e-18	-0.445717	0.994	0.997	1.2863e-13	Spon1	0.000511467	0.200594	0.182	0.08	1	Phf10	5.82713e-13	0.394396	0.376	0.256	1.17854e-08	Foxn3	4.43683e-14	0.317634	0.347	0.158	8.9735e-10	Fyco1	7.49987e-06	-0.37209	0.866	0.959	0.151685
Ost4	0.00312141	0.298159	0.83	0.63	1	Gpx4	5.35395e-06	-0.307182	1	1	0.102421	Gm11762	4.91869e-05	0.0297473	0.021	0	0.940946	Zdbf2	8.57334e-18	0.500645	0.38	0.124	1.64008e-13	Map1lc3a	0.000525417	0.226292	0.97	0.901	1	Tmem108	5.88353e-13	-0.378875	0.328	0.454	1.18994e-08	Inppl1	5.63968e-14	0.186947	0.176	0.051	1.14062e-09	Tmsb10	8.04611e-06	0.359581	1	0.998	0.162732
Spink4	0.00314297	0.0520352	0.019	0.001	1	Tax1bp1	6.00812e-06	-0.346272	1	1	0.114935	2410004P03Rik	4.91869e-05	0.0297473	0.021	0	0.940946	Cltb	1.0105e-17	0.9076	0.759	0.506	1.93308e-13	Pou2f2	0.000531271	0.208852	0.111	0.038	1	Rcan1	5.89157e-13	0.232891	0.221	0.117	1.19157e-08	Rsrp1	5.65063e-14	-0.419246	0.714	0.832	1.14284e-09	Baz2b	8.10966e-06	-0.347523	0.955	0.986	0.164018
Gapdhs	0.00314297	0.103565	0.019	0.001	1	Rtl8b	6.42207e-06	0.551187	0.468	0.255	0.122854	Gm48747	4.91869e-05	0.0297473	0.021	0	0.940946	Atp5md	1.0179e-17	-0.479217	0.982	0.998	1.94725e-13	Trpm1	0.000538876	0.192914	0.091	0.028	1	Rpl15	5.98378e-13	0.159607	1	0.999	1.21022e-08	Adgrb2	6.58129e-14	0.142996	0.115	0.023	1.33107e-09	Pdzd2	9.20088e-06	-0.489486	0.384	0.568	0.186088
Cmpk2	0.00314297	0.0780304	0.019	0.001	1	Tet1	6.58729e-06	0.281567	0.228	0.068	0.126015	Gm40477	4.91869e-05	0.0297473	0.021	0	0.940946	Cox6b1	1.07762e-17	-0.473427	0.976	0.998	2.06148e-13	2410006H16Rik	0.000544822	0.290548	0.677	0.533	1	Man2a2	6.71601e-13	-0.213722	0.751	0.83	1.35831e-08	Basp1	7.49213e-14	0.510192	0.744	0.534	1.51528e-09	Klf13	9.52865e-06	0.224974	0.134	0.034	0.192717
Gnb3	0.00316562	0.284886	0.981	0.952	1	Soga3	6.92385e-06	0.407939	0.506	0.276	0.132453	Gm40557	4.91869e-05	0.0297473	0.021	0	0.940946	Tmem178b	1.1438e-17	0.303871	0.187	0.028	2.18809e-13	Fam53b	0.000548356	-0.267038	0.727	0.853	1	Ankrd33b	9.10754e-13	-0.232055	0.911	0.948	1.842e-08	Klhl3	9.01304e-14	0.109011	0.084	0.012	1.82289e-09	Srpk2	1.02162e-05	-0.303269	0.866	0.928	0.206622
1700016L21Rik	0.00317397	0.025563	0.019	0.001	1	Casp3	7.43481e-06	0.502442	0.291	0.105	0.142228	Gm26583	4.91869e-05	0.0297473	0.021	0	0.940946	Slc24a3	1.18793e-17	0.302888	0.205	0.035	2.27251e-13	Casz1	0.00059778	-0.229682	1	0.999	1	Fam171b	9.19578e-13	0.217098	0.486	0.327	1.85985e-08	Arhgap31	1.25576e-13	-0.486529	0.34	0.578	2.53976e-09	Rpl6	1.06806e-05	0.264978	1	1	0.216014
Gm27184	0.00317397	0.025563	0.019	0.001	1	Cox4i1	7.87371e-06	-0.271004	1	1	0.150624	Gm26861	4.91869e-05	0.0297473	0.021	0	0.940946	Pgam1	1.25761e-17	-0.655128	0.837	0.935	2.4058e-13	Rps6kl1	0.000623146	0.0626418	0.061	0.014	1	Ddhd2	9.97066e-13	0.159846	0.173	0.08	2.01657e-08	Otx2	1.34877e-13	-0.370723	0.824	0.889	2.72789e-09	Cdk2ap1	1.06858e-05	0.261858	0.393	0.194	0.216121
4933436E23Rik	0.00317397	0.025563	0.019	0.001	1	Cacnb2	8.80759e-06	-0.376924	0.076	0.318	0.168489	Gm28988	4.91869e-05	0.0297473	0.021	0	0.940946	Zfp608	1.39085e-17	0.479579	0.295	0.077	2.6607e-13	Dusp11	0.000648231	-0.27684	0.646	0.75	1	Rpl28	1.07574e-12	0.165741	1	1	2.17568e-08	Usp22	1.47251e-13	0.30379	0.393	0.193	2.97816e-09	Ddx5	1.09899e-05	-0.294247	1	1	0.22227
Brinp3	0.00317397	0.025563	0.019	0.001	1	Lrit3	8.85514e-06	0.125742	0.089	0.009	0.169399	Zmiz1os1	4.91869e-05	0.0297473	0.021	0	0.940946	Sox4	1.42948e-17	0.764943	0.602	0.325	2.73459e-13	Zfp644	0.000649242	-0.25736	0.788	0.883	1	Pkig	1.21911e-12	0.279376	0.925	0.867	2.46565e-08	Bcr	1.7552e-13	0.192371	0.198	0.065	3.54989e-09	Plxna2	1.13843e-05	-0.348842	0.723	0.894	0.230248
1700056E22Rik	0.00317397	0.025563	0.019	0.001	1	Gprasp2	8.88598e-06	0.181703	0.165	0.037	0.169989	Gm47920	4.91869e-05	0.0297473	0.021	0	0.940946	H2afz	1.60837e-17	0.708095	0.976	0.909	3.07682e-13	Tubb3	0.000658619	0.283793	0.394	0.239	1	Cited1	1.346e-12	0.293119	0.404	0.278	2.72228e-08	Actn1	1.99933e-13	0.212342	0.183	0.057	4.04364e-09	Kcnip1	1.1435e-05	0.0604266	0.045	0.002	0.231272
Gm13999	0.00317397	0.025563	0.019	0.001	1	Mdga1	9.06719e-06	0.138895	0.089	0.009	0.173455	4930572G02Rik	4.91869e-05	0.0297473	0.021	0	0.940946	Tmem246	2.78007e-17	0.246111	0.163	0.021	5.31828e-13	Gulp1	0.000691089	-0.3254	0.394	0.566	1	Tmem160	1.35564e-12	0.172266	0.471	0.312	2.74179e-08	Nlk	2.0016e-13	-0.431563	0.649	0.774	4.04824e-09	Wdhd1	1.18364e-05	0.14556	0.071	0.009	0.239392
Gm21994	0.00317397	0.025563	0.019	0.001	1	Atxn7l3b	9.7411e-06	0.33291	1	0.967	0.186347	Fgf17	4.91869e-05	0.0297473	0.021	0	0.940946	Lig1	3.19864e-17	0.395897	0.307	0.085	6.11899e-13	Csnk1e	0.00070635	-0.305746	0.394	0.559	1	Mest	1.37987e-12	0.23312	0.518	0.355	2.79079e-08	Nav2	2.41043e-13	0.174852	0.164	0.047	4.87509e-09	Peli3	1.185e-05	-0.430633	0.33	0.53	0.239667
Gm14221	0.00317397	0.025563	0.019	0.001	1	Zfp608	1.04079e-05	0.395866	0.291	0.112	0.199103	Serp2	4.91869e-05	0.0297473	0.021	0	0.940946	Uqcrh	3.28974e-17	-0.445309	0.994	0.997	6.29328e-13	Ikzf2	0.000758621	-0.291776	0.303	0.485	1	Rpl36	1.47643e-12	0.178479	1	1	2.98609e-08	Olfm1	2.8119e-13	0.384431	0.542	0.332	5.68707e-09	Camk2n1	1.24443e-05	0.373158	0.821	0.704	0.251687
Tcfl5	0.00317397	0.025563	0.019	0.001	1	Atp5l	1.1398e-05	-0.277269	1	1	0.218044	Gm46519	4.91869e-05	0.0297473	0.021	0	0.940946	App	3.44863e-17	0.407471	0.301	0.081	6.59722e-13	Selenop	0.000759918	0.220099	0.253	0.132	1	Rpl37a	1.62106e-12	0.165709	1	1	3.2786e-08	Gm13663	3.1627e-13	0.0744833	0.053	0.004	6.39655e-09	Rpl38	1.26687e-05	0.281206	1	1	0.256224
Chmp4c	0.00317397	0.025563	0.019	0.001	1	Pigu	1.17292e-05	0.208868	0.19	0.051	0.224379	C1qtnf6	4.91869e-05	0.0297473	0.021	0	0.940946	Cox8a	4.11493e-17	-0.410637	1	1	7.87186e-13	Ankrd33b	0.000782596	-0.231693	0.98	0.989	1	Dlg2	1.70875e-12	-0.314433	0.435	0.542	3.45595e-08	Zfp811	3.38588e-13	0.169971	0.137	0.035	6.84795e-09	Ppia	1.28477e-05	0.314266	1	1	0.259845
Ralyl	0.00317397	0.025563	0.019	0.001	1	Gulp1	1.23565e-05	-0.358545	0.127	0.39	0.236381	Gm16576	4.91869e-05	0.0297473	0.021	0	0.940946	Ampd2	4.25858e-17	0.205367	0.127	0.01	8.14666e-13	Itga9	0.000812865	0.0643729	0.03	0.004	1	Aars	1.77899e-12	0.257895	0.555	0.4	3.598e-08	Sstr2	3.48921e-13	0.0433926	0.031	0	7.05692e-09	Ahcyl1	1.35449e-05	-0.349061	0.884	0.943	0.273945
Gm17146	0.00317397	0.025563	0.019	0.001	1	Sptan1	1.30582e-05	0.424203	0.772	0.572	0.249803	Gm41396	4.91869e-05	0.0297473	0.021	0	0.940946	Nxnl1	5.21069e-17	-0.626397	0.187	0.546	9.96805e-13	Rnf121	0.000820426	-0.337552	0.909	0.942	1	Rps24	1.87279e-12	0.175782	1	1	3.78772e-08	Tshz1	3.50178e-13	0.206944	0.198	0.066	7.08236e-09	Tead1	1.37199e-05	0.415589	0.598	0.392	0.277485
Lenep	0.00317397	0.025563	0.019	0.001	1	Higd2a	1.31501e-05	0.426522	0.962	0.862	0.251562	Prph	4.91869e-05	0.0588937	0.021	0	0.940946	Slc25a5	5.54481e-17	-0.592174	0.819	0.934	1.06072e-12	Btg2	0.000821472	-0.236474	0.98	0.996	1	Rps8	1.91056e-12	0.161821	1	1	3.86411e-08	Nav1	4.21561e-13	0.295471	0.275	0.116	8.52608e-09	Rpl37a	1.39508e-05	0.261962	1	1	0.282154
Ctsk	0.00317397	0.025563	0.019	0.001	1	Elmo2	1.35444e-05	0.286023	0.266	0.096	0.259105	Mir155hg	4.91869e-05	0.0297473	0.021	0	0.940946	Atp5b	5.96455e-17	-0.460547	0.994	0.999	1.14102e-12	Trim56	0.000830518	0.0621431	0.03	0.004	1	Hsbp1l1	1.92937e-12	-0.283772	0.37	0.497	3.90214e-08	Shf	5.00088e-13	0.175369	0.141	0.037	1.01143e-08	Mdh1	1.59327e-05	-0.331262	0.982	0.996	0.322238
Gm15441	0.00317397	0.025563	0.019	0.001	1	Tuft1	1.35459e-05	0.135567	0.101	0.014	0.259134	Gm28505	4.91869e-05	0.0588937	0.021	0	0.940946	Ankrd33b	7.08443e-17	-0.612885	0.518	0.81	1.35525e-12	Zfp972	0.000833455	0.0374747	0.03	0.004	1	Hmgn2	2.05727e-12	-0.182207	1	1	4.16082e-08	Gnb1	5.21854e-13	-0.342753	0.927	0.949	1.05545e-08	Pbx3	1.66316e-05	-0.441933	0.277	0.486	0.336374
Dennd2c	0.00317397	0.025563	0.019	0.001	1	Carmil1	1.36275e-05	0.20988	0.165	0.04	0.260694	Lta	4.91869e-05	0.0297473	0.021	0	0.940946	Rtl8b	1.06413e-16	0.554897	0.458	0.187	2.03567e-12	Gm47204	0.000833455	0.0374747	0.03	0.004	1	Fabp5	2.07424e-12	0.268565	0.967	0.944	4.19516e-08	5330434G04Rik	6.32556e-13	0.177648	0.137	0.035	1.27934e-08	Hsp90aa1	1.67069e-05	-0.218792	1	1	0.337897
Prss12	0.00317397	0.025563	0.019	0.001	1	Zfpm2	1.36618e-05	0.170694	0.127	0.023	0.261351	Gm4577	4.91869e-05	0.0297473	0.021	0	0.940946	Ier5	1.17558e-16	0.519192	0.404	0.152	2.24888e-12	Gm49767	0.000833455	0.0374747	0.03	0.004	1	Tnrc6b	2.07885e-12	-0.210139	0.982	0.993	4.20448e-08	Cacna2d2	6.9952e-13	0.165038	0.137	0.035	1.41478e-08	Sars	1.72935e-05	0.575063	0.92	0.849	0.34976
Nkain3	0.00317397	0.025563	0.019	0.001	1	Gapdh	1.37886e-05	-0.36455	0.975	1	0.263775	Nfkbie	4.91869e-05	0.0297473	0.021	0	0.940946	Dclk2	1.22612e-16	0.13463	0.096	0.004	2.34557e-12	Gpc3	0.000849886	0.0549037	0.02	0.002	1	Acadm	2.08868e-12	0.286441	0.709	0.567	4.22436e-08	Ormdl3	9.75785e-13	0.425042	0.649	0.454	1.97353e-08	Ptprg	1.74749e-05	0.312179	0.232	0.095	0.353429
Trim14	0.00317397	0.025563	0.019	0.001	1	St3gal5	1.39399e-05	0.490154	0.57	0.341	0.26667	Gm41584	4.91869e-05	0.0297473	0.021	0	0.940946	Mlf1	1.28598e-16	-0.647349	0.072	0.414	2.46007e-12	Ltbp4	0.000849887	0.0688429	0.02	0.002	1	Smim40	2.37413e-12	-0.204165	0.99	0.996	4.80168e-08	Gchfr	9.76373e-13	0.0867	0.061	0.006	1.97471e-08	Syp	1.78803e-05	-0.340788	0.991	0.986	0.361629
Gm26566	0.00317397	0.025563	0.019	0.001	1	H2afy	1.40045e-05	-0.477617	0.785	0.902	0.267907	Rftn1	4.91869e-05	0.0297473	0.021	0	0.940946	Pdlim3	1.30912e-16	0.653018	0.265	0.066	2.50434e-12	Gm47565	0.000851553	0.0352432	0.03	0.004	1	Rpl34	2.50993e-12	0.166266	1	1	5.07634e-08	Jun	1.08397e-12	-0.445135	0.71	0.82	2.19233e-08	Rtn4	1.78965e-05	-0.32709	0.946	0.991	0.361958
Echdc2	0.00317397	0.025563	0.019	0.001	1	Impg2	1.41226e-05	-0.499142	0.734	0.869	0.270166	Efhb	4.91869e-05	0.0297473	0.021	0	0.940946	Lrrn2	1.54747e-16	0.159594	0.09	0.003	2.9603e-12	Galnt16	0.000851553	0.0352432	0.03	0.004	1	Mfge8	2.77535e-12	0.237565	0.424	0.282	5.61315e-08	Cpe	1.17205e-12	0.471682	0.763	0.621	2.37046e-08	Gars	1.88004e-05	0.483356	0.482	0.299	0.380238
Artn	0.00317397	0.025563	0.019	0.001	1	Sesn3	1.44013e-05	0.626044	0.582	0.364	0.275497	C330008A17Rik	4.91869e-05	0.0297473	0.021	0	0.940946	Slc38a1	1.60246e-16	0.427384	0.361	0.115	3.06551e-12	Pdcl3	0.000855587	0.266344	0.525	0.35	1	Cebpd	2.82566e-12	0.329979	0.559	0.407	5.7149e-08	Gm4258	1.19568e-12	-0.496227	0.324	0.518	2.41825e-08	Id1	1.89042e-05	0.229923	0.107	0.023	0.382338
Fgr	0.00317397	0.025563	0.019	0.001	1	C130036L24Rik	1.47422e-05	0.138376	0.139	0.028	0.282019	Gm5820	4.91869e-05	0.0297473	0.021	0	0.940946	Tnfaip8	1.79353e-16	0.237795	0.114	0.008	3.43103e-12	5031434O11Rik	0.000858497	0.0408285	0.02	0.002	1	Gnas	2.8284e-12	0.200493	0.999	0.994	5.72043e-08	Hap1	1.23596e-12	0.178102	0.218	0.078	2.49974e-08	Mdga1	1.91852e-05	0.316766	0.188	0.066	0.388021
Ncmap	0.00317397	0.025563	0.019	0.001	1	Klf13	1.5242e-05	0.161355	0.114	0.019	0.29158	Gm41717	4.91869e-05	0.0297473	0.021	0	0.940946	Usp46	1.939e-16	0.337148	0.307	0.086	3.7093e-12	Ak5	0.000867184	0.0266147	0.02	0.002	1	Tmem246	3.01668e-12	0.164167	0.161	0.074	6.10124e-08	Celf3	1.3793e-12	0.336925	0.393	0.211	2.78964e-08	Eif2s3x	1.94442e-05	0.273646	0.571	0.337	0.393259
E2f2	0.00317397	0.025563	0.019	0.001	1	Pou2f1	1.61055e-05	-0.362015	0.025	0.238	0.308098	Ablim3	4.91869e-05	0.0297473	0.021	0	0.940946	Limd2	2.06633e-16	0.27493	0.193	0.034	3.95289e-12	Clnk	0.000867184	0.0266147	0.02	0.002	1	Rps19	3.04053e-12	0.182333	0.999	0.999	6.14948e-08	Nefl	1.7713e-12	0.157471	0.107	0.023	3.58245e-08	Uchl1	1.96384e-05	0.242342	0.429	0.229	0.397187
Zar1	0.00317397	0.025563	0.019	0.001	1	Pmm1	1.69308e-05	-0.461489	0.228	0.467	0.323886	Fermt3	4.91869e-05	0.0297473	0.021	0	0.940946	Slc4a5	2.22632e-16	0.431698	0.163	0.023	4.25895e-12	Ccne1	0.000867184	0.0266147	0.02	0.002	1	Mapk4	3.36989e-12	0.138645	0.103	0.035	6.8156e-08	Fabp7	2.01632e-12	-0.384483	0.798	0.889	4.078e-08	Casp7	1.96594e-05	0.153166	0.089	0.016	0.397612
Gm28809	0.00317397	0.025563	0.019	0.001	1	Prnp	1.74486e-05	0.43909	0.835	0.699	0.333793	Usp27x	4.91869e-05	0.0297473	0.021	0	0.940946	Atp5g1	3.06934e-16	-0.500264	0.988	0.995	5.87165e-12	Cnmd	0.000867184	0.0266147	0.02	0.002	1	Ppargc1b	3.57596e-12	-0.304865	0.342	0.461	7.23237e-08	Psd3	2.07508e-12	0.153174	0.145	0.04	4.19685e-08	Tmtc1	1.97302e-05	0.131655	0.08	0.013	0.399044
Map4k1	0.00317397	0.025563	0.019	0.001	1	Klc3	1.75786e-05	-0.439223	0.671	0.834	0.336278	Kif4	4.91869e-05	0.0297473	0.021	0	0.940946	Nxn	3.09955e-16	0.278841	0.277	0.07	5.92944e-12	Crip3	0.000867184	0.0266147	0.02	0.002	1	Lars	3.6097e-12	0.268854	0.55	0.401	7.30062e-08	Atp2c1	2.11733e-12	0.326189	0.565	0.35	4.2823e-08	Dbn1	2.00636e-05	0.292181	0.268	0.116	0.405786
Gm45311	0.00317397	0.025563	0.019	0.001	1	Ndufa5	2.02607e-05	-0.333569	0.987	0.988	0.387588	Scml2	4.91869e-05	0.0297473	0.021	0	0.940946	Snap25	3.11486e-16	-0.518093	0.892	0.988	5.95872e-12	Chrna1	0.000867184	0.0266147	0.02	0.002	1	Sqstm1	3.733e-12	0.226869	0.419	0.278	7.55e-08	C1ql1	2.74557e-12	0.237197	0.221	0.084	5.55292e-08	Mmd2	2.00729e-05	-0.395052	0.161	0.358	0.405975
Fah	0.00317397	0.025563	0.019	0.001	1	Gm34961	2.06679e-05	0.0955331	0.076	0.007	0.395377	Asb11	4.91869e-05	0.0297473	0.021	0	0.940946	Atp5o	3.44912e-16	-0.484401	0.982	0.991	6.59818e-12	Gm49165	0.000867184	0.0266147	0.02	0.002	1	Rps29	4.00471e-12	0.159962	1	1	8.09953e-08	Man1c1	2.7625e-12	0.092973	0.08	0.013	5.58715e-08	Atp1b1	2.01503e-05	0.309891	0.223	0.088	0.40754
Arhgef17	0.00317397	0.025563	0.019	0.001	1	Cox6b1	2.11368e-05	-0.31823	1	0.998	0.404347	Rdh5	4.99828e-05	0.201385	0.146	0.032	0.956171	Mir124-2hg	3.45571e-16	-0.839128	0.687	0.842	6.61077e-12	Vmn1r81	0.000867195	0.0397097	0.02	0.002	1	Atp5mpl	4.0542e-12	-0.201743	1	0.999	8.19961e-08	Galnt18	3.41066e-12	0.0972373	0.076	0.012	6.89807e-08	Mt1	2.07158e-05	0.562927	0.268	0.111	0.418977
Aldoa.1	0.00317397	0.025563	0.019	0.001	1	Gm41031	2.17117e-05	0.0921897	0.076	0.007	0.415344	Ndufa10	5.06641e-05	-0.533952	0.729	0.87	0.969204	Cst3	4.65096e-16	-0.618406	0.916	0.986	8.89729e-12	Myh3	0.000867195	0.0397097	0.02	0.002	1	Slc24a1	4.58946e-12	-0.315525	0.221	0.338	9.28217e-08	Setbp1	4.40488e-12	0.171214	0.183	0.061	8.90886e-08	Mxra7	2.08345e-05	0.380475	0.741	0.577	0.421377
Cyp2e1	0.00317397	0.025563	0.019	0.001	1	Plk5	2.60444e-05	-0.394289	0.038	0.252	0.498229	Rcvrn	5.24974e-05	-1.09056	0.542	0.762	1	Bach2	6.91034e-16	0.170514	0.102	0.006	1.32195e-11	Cnp	0.000886758	0.167945	0.192	0.089	1	Prima1	4.83557e-12	0.0805068	0.046	0.006	9.77993e-08	Phox2a	4.58782e-12	0.131555	0.092	0.017	9.27887e-08	Slc1a4	2.08472e-05	0.156895	0.089	0.016	0.421635
1700125H03Rik	0.00317397	0.025563	0.019	0.001	1	Atp1a3	2.68739e-05	-0.379258	0.987	0.991	0.514097	Tulp1	6.48497e-05	-0.295668	1	0.996	1	Uqcr11	7.30445e-16	-0.436563	0.982	0.999	1.39734e-11	Hadhb	0.000917742	-0.274982	0.283	0.46	1	Mbnl1	5.29038e-12	-0.277984	0.621	0.679	1.06998e-07	Cpne5	4.68304e-12	0.10302	0.065	0.008	9.47145e-08	Impdh1	2.09563e-05	-0.369429	0.812	0.921	0.423842
Gm26739	0.00317397	0.025563	0.019	0.001	1	Amer1	2.70139e-05	0.191375	0.139	0.03	0.516775	Gm10605	6.9782e-05	0.137576	0.146	0.032	1	Crb1	7.48866e-16	-0.560463	0.114	0.45	1.43258e-11	Map2	0.000926836	-0.227683	0.99	0.998	1	Aig1	5.68417e-12	0.187866	0.561	0.396	1.14962e-07	Rusc1	4.86444e-12	0.0809011	0.069	0.009	9.83833e-08	Ankrd12	2.28229e-05	-0.348203	0.991	0.998	0.461593
Pknox2	0.00317397	0.025563	0.019	0.001	1	Fam161a	2.73383e-05	-0.460271	0.266	0.507	0.522981	Cxxc5	7.10485e-05	0.418641	0.896	0.646	1	Nxnl2	7.95046e-16	-0.698075	0.494	0.775	1.52092e-11	Ccar1	0.00093527	-0.220297	0.808	0.939	1	Tox3	5.80029e-12	0.204308	0.394	0.25	1.17311e-07	Cep170	5.13999e-12	0.299878	0.313	0.148	1.03956e-07	Mex3a	2.28541e-05	0.195137	0.357	0.172	0.462223
Olfr905	0.00317397	0.025563	0.019	0.001	1	Atp5o	2.82929e-05	-0.31549	0.975	0.991	0.541243	Cntn1	7.20598e-05	0.328266	0.167	0.042	1	Grip1	8.17063e-16	0.27493	0.181	0.03	1.56304e-11	Slc39a14	0.00093892	0.106838	0.101	0.034	1	Baz2b	6.28327e-12	-0.223453	0.961	0.983	1.27079e-07	Mpped2	6.17108e-12	-0.453028	0.351	0.558	1.2481e-07	Ppp1r2	2.29583e-05	0.282903	0.527	0.301	0.464331
Zbtb16	0.00317397	0.025563	0.019	0.001	1	Arhgap26	2.9769e-05	0.26474	0.266	0.098	0.569482	H3f3b	7.22317e-05	0.252265	1	1	1	Lrrc4	9.14651e-16	0.190479	0.145	0.018	1.74973e-11	Ptprz1	0.000939547	0.237127	0.212	0.103	1	Prag1	6.64708e-12	0.224803	0.257	0.148	1.34437e-07	Ttc3	7.91654e-12	0.412982	0.744	0.542	1.60112e-07	Nnat	2.31634e-05	0.753491	0.929	0.853	0.46848
Cdhr4	0.00317397	0.025563	0.019	0.001	1	Jund	3.12679e-05	0.413586	0.987	0.949	0.598155	Mgst3	7.2959e-05	0.386141	0.625	0.353	1	Tmem131l	9.92368e-16	0.241679	0.163	0.024	1.8984e-11	Fam221b	0.00096208	0.0741108	0.061	0.015	1	Lgr5	7.74678e-12	0.133692	0.099	0.033	1.56679e-07	Cacna1h	8.21043e-12	0.112477	0.088	0.016	1.66056e-07	Mrpl52	2.34703e-05	0.406721	0.839	0.778	0.474686
Gm47112	0.00317397	0.025563	0.019	0.001	1	Cxxc5	3.23732e-05	0.3424	0.861	0.664	0.6193	Gzmm	7.65176e-05	0.398037	0.417	0.184	1	Mtus2	1.01608e-15	0.438247	0.271	0.073	1.94376e-11	Acin1	0.000974624	-0.217134	0.879	0.922	1	Ift57	7.87015e-12	0.308775	0.587	0.459	1.59174e-07	Cngb1	8.66667e-12	-0.45859	0.492	0.657	1.75283e-07	Set	2.38974e-05	0.280372	1	0.995	0.483326
Jsrp1	0.00317397	0.025563	0.019	0.001	1	Trib1	3.24544e-05	-0.49731	0.342	0.568	0.620852	Asph	7.72074e-05	0.367217	0.354	0.15	1	Rasa3	1.03395e-15	0.236912	0.187	0.032	1.97795e-11	Rrp12	0.000985244	0.115477	0.131	0.051	1	Sphkap	9.49704e-12	0.231998	0.367	0.237	1.92078e-07	Fgf18	9.3071e-12	0.0515359	0.038	0.002	1.88236e-07	Ptprs	2.55523e-05	0.291613	0.929	0.866	0.516796
Gm29585	0.00317397	0.025563	0.019	0.001	1	Nadk2	3.37831e-05	-0.434365	0.722	0.836	0.646271	Tagln3	7.85612e-05	0.191669	0.188	0.05	1	Vat1l	1.20106e-15	0.29445	0.265	0.067	2.29763e-11	Pnisr	0.00101005	-0.244457	0.99	0.991	1	Prnp	9.56823e-12	0.209686	0.986	0.962	1.93517e-07	Cst3	9.50181e-12	-0.313114	0.958	0.979	1.92174e-07	Ier5l	2.6451e-05	0.0986385	0.062	0.007	0.534972
Vrk2	0.00317397	0.025563	0.019	0.001	1	Prkce	3.40407e-05	0.351662	0.316	0.138	0.651199	Csrp2	8.45277e-05	0.384976	0.167	0.043	1	Ptgds	1.20951e-15	1.96067	0.211	0.045	2.31379e-11	Son	0.00101878	-0.188729	0.99	1	1	Meis2	1.07921e-11	-0.222487	0.904	0.938	2.18271e-07	Gm32849	1.02863e-11	0.048726	0.027	0	2.0804e-07	Ccdc126	2.66383e-05	-0.448931	0.67	0.738	0.538759
Gm12319	0.00317397	0.025563	0.019	0.001	1	Rasa2	3.41349e-05	0.410618	0.392	0.196	0.653001	Hpcal1	8.56512e-05	-0.477347	0.188	0.469	1	Gnb3	1.40128e-15	0.637007	0.964	0.971	2.68066e-11	Naa40	0.00103988	-0.294167	0.263	0.416	1	Zfas1	1.13236e-11	0.178606	0.501	0.342	2.2902e-07	Kansl1l	1.10606e-11	-0.372812	0.24	0.452	2.23701e-07	Zfp704	2.84711e-05	0.328782	0.527	0.323	0.575828
Gm11534	0.00317397	0.025563	0.019	0.001	1	Dock4	3.55407e-05	0.138895	0.089	0.012	0.679893	Anxa2	9.11543e-05	0.162238	0.104	0.018	1	Ralgds	1.64102e-15	0.36584	0.325	0.101	3.13927e-11	Malat1	0.0010464	-0.221344	1	1	1	Try4	1.14128e-11	0.0881522	0.045	0.006	2.30825e-07	Copz2	1.16021e-11	0.0954498	0.073	0.011	2.34653e-07	Mthfd2	2.94932e-05	0.413685	0.277	0.133	0.5965
Gm11646	0.00317397	0.025563	0.019	0.001	1	Ttc3	3.73838e-05	0.612704	0.861	0.757	0.715152	Slc27a3	9.27486e-05	0.13389	0.062	0.006	1	Trim8	1.67738e-15	0.36707	0.428	0.163	3.20883e-11	Dlg4	0.00107037	-0.259991	0.899	0.946	1	Bach2	1.2397e-11	0.182915	0.139	0.06	2.5073e-07	C530008M17Rik	1.19232e-11	0.259095	0.34	0.166	2.41146e-07	Ebna1bp2	2.99421e-05	0.294046	0.714	0.462	0.60558
Gm11766	0.00317397	0.025563	0.019	0.001	1	Apba2	3.84665e-05	0.164668	0.101	0.016	0.735864	Wnt3	9.27486e-05	0.187329	0.062	0.006	1	Calm1	1.83651e-15	0.635261	0.976	0.965	3.51325e-11	Pde5a	0.00110974	0.120807	0.111	0.04	1	Nog	1.42023e-11	0.0817275	0.061	0.013	2.87242e-07	Erc1	1.21313e-11	0.117602	0.103	0.023	2.45355e-07	Cebpg	3.08926e-05	0.679728	0.429	0.267	0.624803
Gm49700	0.00317397	0.025563	0.019	0.001	1	Grip1	4.02768e-05	0.14193	0.114	0.021	0.770494	Plcl1	9.84988e-05	0.104603	0.062	0.006	1	Nab1	1.97652e-15	0.44066	0.404	0.149	3.78109e-11	Epb41l4a	0.00111388	0.0766779	0.071	0.019	1	Bcl2l11	1.46387e-11	0.240578	0.246	0.143	2.96068e-07	Rho	1.35353e-11	-0.390964	0.763	0.845	2.73752e-07	Aipl1	3.23023e-05	-0.423937	0.866	0.943	0.653314
2900060N12Rik	0.00317397	0.025563	0.019	0.001	1	Prcd	4.03854e-05	-0.35255	0.949	0.977	0.772572	Fn1	9.99743e-05	0.078395	0.062	0.006	1	Myof	2.04452e-15	0.202389	0.09	0.004	3.91116e-11	Scube1	0.00113513	0.179349	0.202	0.099	1	Atpif1	1.58631e-11	0.197566	0.988	0.99	3.20831e-07	Kif26a	1.43108e-11	0.0711592	0.057	0.006	2.89435e-07	Lrp4	3.28188e-05	-0.347394	0.08	0.265	0.66376
Gm26531	0.00317397	0.025563	0.019	0.001	1	Tmem135	4.05333e-05	-0.406859	0.165	0.397	0.775402	Capn2	9.99743e-05	0.078395	0.062	0.006	1	Mat2a	2.29201e-15	-0.62576	0.639	0.86	4.38461e-11	Cdc42ep3	0.00122837	-0.273485	0.384	0.528	1	Crx	1.60858e-11	-0.187871	0.997	0.999	3.25335e-07	Mafa	1.43566e-11	0.0868714	0.069	0.01	2.90362e-07	Rps8	3.4853e-05	0.271578	1	1	0.704902
Hist1h2bg	0.00317397	0.025563	0.019	0.001	1	Slc8a3	4.11489e-05	0.275271	0.266	0.1	0.787178	Gm28625	9.99743e-05	0.078395	0.062	0.006	1	Nova1	2.36113e-15	0.175168	0.108	0.008	4.51684e-11	Frmd4b	0.00124428	-0.235091	0.919	0.966	1	Pkia	1.74104e-11	0.196226	0.26	0.153	3.52125e-07	Insyn1	1.59007e-11	0.0596055	0.046	0.003	3.21593e-07	Phf10	3.58971e-05	0.471741	0.393	0.238	0.726018
D130043K22Rik	0.00317397	0.025563	0.019	0.001	1	Shank2	4.12484e-05	0.0988843	0.063	0.005	0.789083	Samd11	0.0001079	-0.507466	0.771	0.928	1	Baiap2	2.484e-15	0.326967	0.229	0.052	4.75189e-11	Cers6	0.00125949	0.0937821	0.091	0.03	1	Rpl23	1.76016e-11	0.158968	1	1	3.55992e-07	Etl4	1.6886e-11	0.07387	0.061	0.008	3.41519e-07	Hist4h4	3.59172e-05	0.321784	0.098	0.022	0.726424
A330102I10Rik	0.00317397	0.025563	0.019	0.001	1	Slc16a8	4.12484e-05	0.132437	0.063	0.005	0.789083	Wscd2	0.000129214	0.0838288	0.042	0.003	1	Agpat5	2.52394e-15	0.843116	0.783	0.632	4.82831e-11	mt-Atp8	0.00127152	0.252472	0.949	0.887	1	Rtn1	1.88948e-11	-0.194591	0.699	0.785	3.82148e-07	Pak6	1.70063e-11	0.0425575	0.031	0.001	3.43952e-07	Stmn1	3.62951e-05	0.44723	0.938	0.837	0.734069
Gm30489	0.00317397	0.025563	0.019	0.001	1	Alg2	4.23703e-05	0.411214	0.418	0.22	0.810544	Gm3739	0.000129214	0.0838288	0.042	0.003	1	Slc29a4	2.56726e-15	0.115304	0.072	0.001	4.91116e-11	Zyx	0.00130617	0.115477	0.081	0.025	1	Trib3	1.94853e-11	0.186717	0.122	0.049	3.9409e-07	Trak2	1.77779e-11	-0.378567	0.401	0.611	3.59558e-07	Ndrg1	3.70327e-05	-0.302088	0.973	0.996	0.748986
Tgfbi	0.00317397	0.025563	0.019	0.001	1	Lig1	4.31943e-05	0.258543	0.228	0.077	0.826307	Dolpp1	0.00012999	0.170575	0.146	0.034	1	Rps24	2.75525e-15	0.336931	1	1	5.2708e-11	Adal	0.00131105	-0.241973	0.121	0.267	1	Ctnnal1	2.06526e-11	0.258979	0.214	0.118	4.17699e-07	Cpt1c	2.1328e-11	0.131583	0.103	0.023	4.31358e-07	Rpl39	3.72566e-05	0.292047	1	1	0.753515
Ntrk2	0.00317397	0.025563	0.019	0.001	1	Kremen1	4.33252e-05	0.151065	0.152	0.037	0.828812	Pou3f1	0.000131931	0.0552597	0.042	0.003	1	Eef1a1	2.7973e-15	0.388452	1	1	5.35124e-11	Zcchc7	0.00131278	-0.28459	0.899	0.936	1	Higd2a	2.17318e-11	0.221817	0.976	0.954	4.39525e-07	Aldh2	2.51718e-11	0.148505	0.126	0.034	5.091e-07	Fibp	3.77485e-05	0.281868	0.464	0.262	0.763464
6720489N17Rik	0.00317397	0.025563	0.019	0.001	1	Fam155a	4.39065e-05	0.0784596	0.063	0.005	0.839932	Ccdc158	0.000131931	0.0552597	0.042	0.003	1	Scgn	2.80854e-15	0.181173	0.084	0.003	5.37274e-11	Prph2	0.00133145	-0.155398	1	1	1	Gm5617	2.18369e-11	0.179262	0.576	0.413	4.41651e-07	Dyrk2	2.52464e-11	-0.415357	0.473	0.648	5.10608e-07	Dst	3.81453e-05	0.386555	0.286	0.133	0.77149
Crhbp	0.00317397	0.025563	0.019	0.001	1	Neurod1	4.53511e-05	-0.356146	0.987	1	0.867566	Fzd10os	0.000131931	0.0552597	0.042	0.003	1	Chchd10	2.91181e-15	-0.553974	0.898	0.981	5.57029e-11	Fibp	0.00134819	0.238278	0.535	0.364	1	Hif1a	2.52384e-11	-0.171583	0.999	0.998	5.10447e-07	Shisa9	3.13626e-11	0.0780192	0.05	0.005	6.34309e-07	Chic2	3.95501e-05	0.243185	0.598	0.357	0.799901
Lrmda	0.00317397	0.025563	0.019	0.001	1	Atp5b	4.82745e-05	-0.325651	0.987	0.998	0.92349	Fes	0.000131931	0.0552597	0.042	0.003	1	Apobec2	5.0239e-15	-0.586806	0.205	0.533	9.61072e-11	Dync1i2	0.00135199	-0.222115	0.98	0.998	1	Ssu72	2.63714e-11	-0.202766	0.991	0.989	5.33362e-07	Cyfip2	3.24106e-11	0.225865	0.24	0.101	6.55505e-07	Trim9	3.96234e-05	-0.411339	0.205	0.403	0.801383
Gm48949	0.00317397	0.025563	0.019	0.001	1	Hsbp1l1	4.87361e-05	-0.489732	0.253	0.479	0.932321	Csrnp1	0.000131931	0.0552597	0.042	0.003	1	Gm10605	6.12149e-15	0.286864	0.193	0.038	1.17104e-10	Dnm3	0.00138574	-0.291774	0.909	0.953	1	Trp53cor1	2.69165e-11	0.153201	0.095	0.033	5.44387e-07	Marveld1	3.24865e-11	0.0676026	0.05	0.005	6.5704e-07	Gdf15	4.02171e-05	0.518076	0.116	0.03	0.81339
Myc	0.00317397	0.025563	0.019	0.001	1	Ptprs	4.88632e-05	0.454009	0.709	0.505	0.934753	Pkib	0.000131931	0.0552597	0.042	0.003	1	Desi1	7.06879e-15	-0.624124	0.229	0.543	1.35226e-10	Gm49494	0.00145191	0.0730091	0.061	0.016	1	Glce	2.69926e-11	0.212064	0.188	0.097	5.45926e-07	Hdac6	3.38249e-11	0.210572	0.237	0.098	6.84108e-07	Grin2c	4.14764e-05	0.160793	0.071	0.011	0.838861
Gm49544	0.00317397	0.025563	0.019	0.001	1	Enho	5.26217e-05	0.27394	0.215	0.072	1	4933417E11Rik	0.000131937	0.0820153	0.042	0.003	1	Slc7a1	7.24115e-15	0.199418	0.133	0.016	1.38523e-10	Phf10	0.0014999	0.277007	0.404	0.27	1	Agtpbp1	2.98512e-11	0.238156	0.998	0.998	6.03741e-07	Scd2	3.51875e-11	0.358825	0.683	0.496	7.11667e-07	Prdx1	4.15926e-05	0.4192	0.929	0.896	0.841209
Tmem117	0.00317397	0.025563	0.019	0.001	1	Nxnl1	5.33058e-05	-0.433878	0.266	0.523	1	Psd3	0.000133666	0.259973	0.125	0.026	1	Ndrg1	7.90477e-15	-0.544743	0.789	0.929	1.51218e-10	Nfic	0.00154158	-0.22633	0.96	0.994	1	Atp5k	3.03108e-11	-0.199279	0.999	0.998	6.13036e-07	Rtn1	4.02439e-11	0.489649	0.637	0.46	8.13933e-07	Ciart	4.22551e-05	0.114623	0.071	0.011	0.85461
Gm15537	0.00317397	0.025563	0.019	0.001	1	Pja1	5.4201e-05	0.284804	0.43	0.213	1	Gsta4	0.000133747	0.395062	0.271	0.097	1	Tubb2b	8.40644e-15	0.481619	0.307	0.097	1.60815e-10	Taz	0.00156308	-0.288876	0.263	0.427	1	Reep6	3.25046e-11	-0.31129	0.462	0.552	6.57406e-07	Zfp536	4.73926e-11	0.356299	0.71	0.506	9.58516e-07	Ptprj	4.26121e-05	0.0841056	0.071	0.011	0.86183
Robo1	0.00317397	0.025563	0.019	0.001	1	Fmn2	5.42854e-05	0.0537713	0.038	0	1	Pik3r1	0.000134478	0.523804	0.896	0.791	1	Prxl2a	8.46663e-15	0.638489	0.633	0.365	1.61967e-10	R3hdm1	0.00159784	-0.234641	0.929	0.95	1	Myl6	3.77371e-11	0.172996	1	0.998	7.63232e-07	Zmiz1	4.81036e-11	0.257293	0.313	0.152	9.72895e-07	Dipk1a	4.36156e-05	-0.362318	0.286	0.509	0.882126
Gm21833	0.00317397	0.025563	0.019	0.001	1	Chml	5.42854e-05	0.0537713	0.038	0	1	Ccdc18	0.000134711	0.0516348	0.042	0.003	1	Nrcam	1.1616e-14	0.361259	0.283	0.083	2.22214e-10	Cadps	0.00159792	0.370212	0.263	0.152	1	Ptprs	4.17035e-11	0.199196	0.926	0.909	8.43454e-07	Stat5b	5.04557e-11	0.0868714	0.065	0.009	1.02047e-06	Lyar	4.38586e-05	-0.421733	0.75	0.835	0.88704
Tgif1	0.00317397	0.025563	0.019	0.001	1	Kcnd3os	5.42854e-05	0.0537713	0.038	0	1	Atp5g3	0.000136753	-0.336006	1	0.997	1	Cmtr1	1.41509e-14	0.48678	0.464	0.205	2.70706e-10	Jtb	0.00160078	0.272459	0.606	0.458	1	Pitpnm3	4.23446e-11	-0.281379	0.635	0.68	8.5642e-07	Ahcyl2	5.09532e-11	0.169219	0.198	0.074	1.03053e-06	Galnt16	4.38663e-05	0.132804	0.071	0.011	0.887196
Ttc39d	0.00317397	0.025563	0.019	0.001	1	Gm43847	5.42854e-05	0.0537713	0.038	0	1	Xist	0.000138228	0.485604	0.958	0.764	1	Gas1	1.47197e-14	0.272281	0.108	0.009	2.81587e-10	Nktr	0.00160805	-0.241772	0.97	0.997	1	Dgkh	4.41789e-11	-0.264059	0.147	0.255	8.93518e-07	Tmem132d	5.32473e-11	0.0858702	0.057	0.007	1.07693e-06	Lhfpl3	4.41467e-05	-0.331049	0.107	0.292	0.892868
Gm6277	0.00317397	0.025563	0.019	0.001	1	Echdc2	5.42854e-05	0.0537713	0.038	0	1	Plch2	0.000145705	-0.433175	0.188	0.48	1	Epha5	1.79694e-14	0.769598	0.765	0.555	3.43755e-10	Pias3	0.00167627	-0.269491	0.818	0.887	1	Gm45159	4.5292e-11	-0.372991	0.524	0.588	9.16031e-07	Cpne9	5.66538e-11	0.0782218	0.057	0.007	1.14582e-06	Rufy3	4.45903e-05	-0.301194	0.938	0.966	0.901839
Gm3227	0.00317397	0.025563	0.019	0.001	1	Gm38804	5.42854e-05	0.0537713	0.038	0	1	Atp5d	0.000156331	-0.391884	0.979	0.963	1	Isoc1	1.80993e-14	0.350986	0.301	0.092	3.46239e-10	Osbpl6	0.00170067	0.138263	0.141	0.061	1	Snhg12	4.58258e-11	0.280779	0.548	0.405	9.26828e-07	Mcc	6.07116e-11	0.170662	0.13	0.037	1.22789e-06	Rmrp	4.48904e-05	0.217231	0.08	0.014	0.907909
4930592I03Rik	0.00317397	0.025563	0.019	0.001	1	Gm15634	5.42854e-05	0.0537713	0.038	0	1	Eno1	0.000164018	-0.487144	0.688	0.866	1	Tshz1	1.83846e-14	0.320742	0.265	0.072	3.51697e-10	Vps13a	0.0017218	-0.196242	0.04	0.157	1	Hsp90aa1	4.84496e-11	-0.153834	1	1	9.79894e-07	Lrtm1	8.38271e-11	0.110015	0.088	0.018	1.6954e-06	Oga	4.62652e-05	0.271978	0.58	0.349	0.935714
Fnd3c2	0.00317397	0.025563	0.019	0.001	1	Isl2	5.42854e-05	0.0537713	0.038	0	1	Cox6a1	0.000178056	-0.338178	1	0.995	1	Prickle2	2.02658e-14	0.140989	0.09	0.005	3.87685e-10	Zfp94	0.0017246	0.100393	0.111	0.042	1	Crtac1	5.10753e-11	0.2866	0.442	0.318	1.033e-06	Pbx1	8.67671e-11	0.402453	0.637	0.468	1.75486e-06	Zfp423	4.73484e-05	0.270886	0.188	0.07	0.957621
Dach2	0.00317397	0.025563	0.019	0.001	1	Myc	5.42854e-05	0.0537713	0.038	0	1	Ralgds	0.000182448	0.281343	0.25	0.088	1	Cox4i1	2.03163e-14	-0.330928	1	1	3.8865e-10	Pten	0.00172466	-0.219361	0.828	0.86	1	Unc119	5.29661e-11	-0.152251	1	1	1.07124e-06	Vgf	9.5464e-11	0.064029	0.046	0.004	1.93076e-06	Vipr2	4.90258e-05	-0.356327	0.08	0.26	0.991546
Wnt10a	0.00320527	0.0241602	0.019	0.001	1	Nudt11	5.42854e-05	0.0537713	0.038	0	1	Atp5j2	0.000187012	-0.282237	1	1	1	Six3os1	2.07939e-14	0.330889	0.289	0.085	3.97787e-10	Abhd14b	0.00175709	-0.246938	0.939	0.963	1	Frmd4a	5.56362e-11	0.14573	0.327	0.202	1.12524e-06	Hif1a	9.74745e-11	-0.366057	0.733	0.821	1.97142e-06	Gm35021	5.04871e-05	0.118678	0.08	0.014	1
Notch2	0.00320527	0.0241602	0.019	0.001	1	Rtl8c	5.42854e-05	0.0537713	0.038	0	1	Fam57b	0.000190891	-0.471916	0.75	0.938	1	Ankrd33	2.33385e-14	-0.598485	0.169	0.485	4.46466e-10	Mpp3	0.00176751	0.148546	0.091	0.031	1	Plxna2	5.89422e-11	-0.23594	0.758	0.836	1.19211e-06	Pnmal1	1.02879e-10	0.135667	0.095	0.021	2.08072e-06	Slc25a5	5.07189e-05	-0.31687	0.982	1	1
Syt6	0.00320527	0.0241602	0.019	0.001	1	Tafa3	5.42891e-05	0.0712587	0.038	0	1	Sdha	0.00019421	-0.382843	0.312	0.603	1	Guk1	2.34952e-14	-0.674085	0.62	0.822	4.49463e-10	Mfsd8	0.00178871	-0.210897	0.081	0.211	1	Psat1	5.98737e-11	0.224772	0.181	0.094	1.21095e-06	Bag4	1.16421e-10	0.184576	0.252	0.108	2.35462e-06	Car3	5.27705e-05	0.0797272	0.054	0.005	1
Gm16174	0.00320527	0.0241602	0.019	0.001	1	Prkg1	5.42891e-05	0.0712587	0.038	0	1	Ldha	0.000196253	-0.276056	1	1	1	Epb41	2.62032e-14	-0.472446	0.904	0.98	5.01267e-10	Ajap1	0.00189702	0.048836	0.051	0.012	1	Nav1	6.17563e-11	0.208799	0.422	0.284	1.24902e-06	Kidins220	1.21532e-10	0.273775	0.378	0.206	2.45798e-06	Mlxip	5.28709e-05	0.118678	0.08	0.014	1
Rasip1	0.00320527	0.0227589	0.019	0.001	1	Trpc5	5.42891e-05	0.0712587	0.038	0	1	Zfyve19	0.000203683	0.219363	0.292	0.11	1	Abi3	2.64388e-14	0.108776	0.06	0	5.05774e-10	Nt5e	0.00192349	-0.292358	0.737	0.757	1	Tead1	6.3325e-11	0.213565	0.578	0.428	1.28075e-06	Frmd4b	1.26642e-10	-0.38475	0.347	0.541	2.56133e-06	Pdlim3	5.64257e-05	0.494614	0.286	0.145	1
Gm3234	0.00320527	0.0227589	0.019	0.001	1	Slc7a3	5.42903e-05	0.10561	0.038	0	1	Rps4x	0.000211393	0.399052	1	0.999	1	Kif26a	2.64406e-14	0.116814	0.06	0	5.0581e-10	Sag	0.00193705	-0.178071	1	1	1	H2afy	7.17921e-11	-0.206687	0.986	0.994	1.45199e-06	Sox2ot	1.39907e-10	0.13486	0.118	0.032	2.82963e-06	Klhl9	5.7615e-05	0.272372	0.643	0.394	1
Pard3	0.00326725	0.220138	0.321	0.163	1	Tnrc18	5.43891e-05	0.250743	0.241	0.086	1	Ndufb9	0.000218344	-0.312364	1	1	1	Arr3	2.85453e-14	0.258634	0.145	0.021	5.46072e-10	Ubn2	0.00193727	-0.256958	0.96	0.956	1	Rps9	7.1839e-11	0.151741	1	1	1.45294e-06	Plekhg1	1.43374e-10	0.134038	0.099	0.023	2.89975e-06	Calm1	5.78681e-05	0.374731	1	0.995	1
Siva1	0.00327256	0.225268	0.585	0.384	1	Acsl1	5.50508e-05	-0.427564	0.544	0.741	1	Nxn	0.000220563	0.212896	0.188	0.055	1	Kctd8	3.0215e-14	0.181502	0.133	0.017	5.78012e-10	Ocrl	0.00196438	-0.233077	0.232	0.385	1	Rpl12	8.62797e-11	0.174919	0.995	0.993	1.74501e-06	Rs1	1.49052e-10	-0.361309	0.672	0.789	3.01457e-06	Cox6b2	6.03475e-05	0.252194	0.116	0.03	1
Rmdn2	0.00342969	0.129656	0.075	0.018	1	Cdk6	5.54268e-05	0.293951	0.215	0.072	1	Pinx1	0.000224433	0.258944	0.208	0.066	1	Tpbgl	3.14211e-14	0.216962	0.163	0.027	6.01085e-10	Prpf4b	0.00198175	-0.253155	0.96	0.973	1	Hook1	1.03747e-10	-0.226122	0.743	0.81	2.09828e-06	Rgs12	1.51189e-10	0.117725	0.115	0.03	3.0578e-06	Xpo1	6.36437e-05	0.305489	0.545	0.326	1
Nsd1	0.00365258	0.315471	0.811	0.672	1	Sgip1	5.63167e-05	0.396345	0.633	0.4	1	Cox6c	0.000236347	-0.290278	1	1	1	Zfp827	3.50136e-14	0.236912	0.181	0.035	6.6981e-10	Espn	0.00199133	0.271733	0.283	0.161	1	Arhgef26	1.10103e-10	-0.262782	0.326	0.436	2.22683e-06	Elovl6	1.76016e-10	0.274373	0.324	0.166	3.55993e-06	Anapc16	6.43981e-05	0.374954	0.58	0.382	1
Cpt1b	0.00367567	0.0464325	0.038	0.005	1	Ndufv3	5.64559e-05	-0.286163	1	1	1	Gngt1	0.000238767	-0.401132	0.979	0.996	1	Maged1	3.60309e-14	0.516383	0.735	0.472	6.89271e-10	Sorl1	0.00200742	0.110023	0.071	0.021	1	Spsb2	1.11264e-10	0.236297	0.277	0.173	2.25031e-06	C230014O12Rik	1.91806e-10	0.0746988	0.057	0.008	3.87927e-06	Tceal9	6.50792e-05	0.262034	0.946	0.901	1
Chml	0.00371409	0.0450352	0.038	0.005	1	Mdh1	5.81312e-05	-0.387904	0.937	0.935	1	Wdr20	0.000243443	-0.390337	0.083	0.335	1	Tagln3	3.84748e-14	0.321579	0.271	0.076	7.36024e-10	Shisa2	0.00208743	-0.270452	0.798	0.855	1	Ldha	1.26881e-10	-0.140129	1	1	2.56616e-06	Msi1	2.00881e-10	-0.369216	0.721	0.795	4.06282e-06	Jpt1	6.85925e-05	0.348368	0.839	0.729	1
Rfxank	0.003831	0.201559	0.208	0.091	1	Gdf11	5.81967e-05	0.23732	0.19	0.058	1	Chgb	0.000258018	0.516604	0.938	0.974	1	Psip1	3.89461e-14	0.440839	0.976	0.938	7.45039e-10	Rraga	0.00209795	-0.213462	0.99	0.988	1	Hook3	1.28346e-10	-0.206225	0.918	0.949	2.59581e-06	Cyp51	2.02204e-10	0.258237	0.256	0.116	4.08958e-06	H2afy2	6.97222e-05	0.21663	0.295	0.136	1
Rps10	0.00401806	0.165331	1	1	1	Slc35g2	5.8927e-05	0.347397	0.342	0.157	1	Slc24a3	0.000258555	0.170575	0.146	0.037	1	Gnai2	4.09592e-14	0.567317	0.464	0.215	7.83549e-10	Prkcd	0.00210012	0.0730091	0.061	0.016	1	Gckr	1.28429e-10	0.159092	0.088	0.03	2.59747e-06	Lrrn2	2.02829e-10	0.0932683	0.088	0.019	4.10221e-06	Hdlbp	7.16391e-05	0.384866	0.607	0.416	1
Pcdh17	0.00428174	0.19932	0.132	0.045	1	Lsm2	6.00464e-05	-0.425703	0.228	0.456	1	Six6	0.000271692	0.403108	0.354	0.161	1	Ccdc126	4.66649e-14	-0.518061	0.608	0.837	8.92699e-10	Rnf11	0.00210396	-0.245565	0.758	0.835	1	Rpl11	1.37946e-10	0.15307	1	1	2.78995e-06	Gm30373	2.15063e-10	0.0462221	0.034	0.002	4.34964e-06	Trib3	7.392e-05	0.287019	0.134	0.041	1
Neurl1a	0.00436005	0.154804	0.302	0.151	1	Rybp	6.2311e-05	0.312849	0.481	0.266	1	Ndufa1	0.000288291	-0.346671	0.958	0.985	1	Efs	4.95512e-14	0.0991841	0.066	0.001	9.47914e-10	Gm39214	0.00214776	0.121875	0.101	0.037	1	Gabrb3	1.4331e-10	0.203073	0.496	0.351	2.89845e-06	AI197445	2.15063e-10	0.0462221	0.034	0.002	4.34964e-06	Rap1a	7.48915e-05	0.280284	0.518	0.31	1
Dimt1	0.00450531	0.196027	0.283	0.141	1	Fbxw11	6.26619e-05	0.200647	0.405	0.185	1	Amotl2	0.000300515	0.21614	0.292	0.113	1	Tmem200c	4.98158e-14	0.0910562	0.066	0.001	9.52977e-10	Hcn1	0.0021614	-0.222415	0.99	0.999	1	Pbx3	1.46405e-10	-0.275841	0.396	0.501	2.96104e-06	Rcvrn	2.18539e-10	-0.293138	0.924	0.958	4.41994e-06	Ppef2	7.54276e-05	-0.392408	0.25	0.434	1
Cntn1	0.00452565	0.152346	0.132	0.046	1	Mir124-2hg	6.42147e-05	-0.585517	0.696	0.841	1	Otub2	0.000310692	0.214612	0.188	0.057	1	Shank2	5.22566e-14	0.110784	0.078	0.003	9.99668e-10	Lama5	0.00218124	0.0504337	0.03	0.005	1	Kpna3	1.46965e-10	-0.219781	0.736	0.817	2.97237e-06	Slc4a3	2.27848e-10	0.137292	0.103	0.025	4.60823e-06	Vsx2	7.75513e-05	0.238991	0.348	0.176	1
Btbd10	0.00471393	0.154584	0.34	0.176	1	Six3os1	6.48736e-05	0.263189	0.228	0.079	1	Gm47167	0.000320396	0.104603	0.062	0.008	1	Ptprs	5.23684e-14	0.616996	0.705	0.469	1.00181e-09	Ctnnbip1	0.00218136	0.213527	0.354	0.222	1	Snrnp70	1.52176e-10	-0.170912	0.989	0.993	3.07777e-06	Pdxp	2.63876e-10	0.184272	0.218	0.089	5.33689e-06	Ctnnb1	7.82652e-05	0.284616	0.946	0.869	1
Chrna5	0.00480222	0.131558	0.132	0.046	1	Pde3a	6.54573e-05	0.135796	0.051	0.002	1	Gm20186	0.000333294	0.0765882	0.062	0.008	1	Myh3	5.67874e-14	0.121788	0.072	0.002	1.08634e-09	Celf3	0.00218379	0.365776	0.485	0.356	1	Ndfip1	1.63768e-10	-0.180429	0.999	0.998	3.3122e-06	Rab19	3.05101e-10	0.0326662	0.023	0	6.17066e-06	Hmox1	8.21717e-05	0.150574	0.107	0.027	1
C1qtnf12	0.00497211	0.311265	0.811	0.679	1	Chst2	6.6133e-05	0.119117	0.051	0.002	1	Arhgdig	0.000333294	0.0765882	0.062	0.008	1	mt-Nd5	5.98767e-14	-0.43867	0.988	0.996	1.14544e-09	Fbxo8	0.00218461	-0.227032	0.141	0.284	1	Rpl18a	1.68353e-10	0.147764	1	1	3.40493e-06	Ly6h	3.13397e-10	0.160397	0.126	0.037	6.33846e-06	Ciao2a	8.31213e-05	0.176519	0.554	0.326	1
Nrep	0.00502286	0.341369	0.906	0.825	1	Lrrn2	6.68119e-05	0.119117	0.051	0.002	1	Armcx2	0.000333294	0.0765882	0.062	0.008	1	Serinc5	6.14525e-14	0.374989	0.325	0.11	1.17559e-09	1810041H14Rik	0.00219497	0.0770633	0.03	0.005	1	H3f3b	1.92549e-10	0.135528	1	1	3.89431e-06	Epha5	3.25895e-10	-0.438349	0.37	0.561	6.59122e-06	Uckl1os	8.51725e-05	-0.397479	0.259	0.446	1
Tprn	0.00517953	0.0771443	0.075	0.019	1	Trp53i11	6.68119e-05	0.0851698	0.051	0.002	1	Sumo2	0.000357841	0.325183	1	0.981	1	Cox5a	6.27786e-14	-0.466023	0.964	0.983	1.20095e-09	Far1	0.00221106	-0.273652	0.303	0.465	1	Rps27	1.95294e-10	0.159272	1	1	3.94983e-06	Frmd4a	3.66044e-10	0.240837	0.206	0.084	7.40323e-06	Zfp608	8.57356e-05	0.314695	0.304	0.152	1
Ppfia1	0.00545228	0.304091	0.509	0.352	1	AV099323	6.68119e-05	0.0851698	0.051	0.002	1	Slc2a1	0.000361556	-0.46297	0.188	0.429	1	En2	6.54527e-14	0.151128	0.12	0.014	1.25211e-09	Klf4	0.00221515	0.0836284	0.121	0.048	1	Pias3	1.98221e-10	-0.22672	0.752	0.811	4.00903e-06	Kcnk9	3.699e-10	0.0629393	0.031	0.001	7.48124e-06	Ckb	8.62585e-05	-0.24617	1	1	1
Pdxp	0.00547736	0.215458	0.321	0.174	1	2810433D01Rik	6.68119e-05	0.102243	0.051	0.002	1	Rasa3	0.00037292	0.155149	0.125	0.029	1	Gclm	6.87437e-14	0.505513	0.584	0.312	1.31507e-09	Kirrel3	0.00222263	0.0482039	0.03	0.005	1	Nme2	2.12881e-10	0.192434	0.776	0.731	4.30552e-06	Lrrtm4	3.72139e-10	0.0576644	0.031	0.001	7.52651e-06	Rps27a	8.76975e-05	0.210204	1	1	1
Slc27a1	0.00553444	0.182611	0.245	0.118	1	Ppp1r1a	6.73517e-05	0.212174	0.215	0.072	1	Zfp317	0.000374845	0.220396	0.229	0.081	1	Pbx3	7.51387e-14	-0.499399	0.084	0.379	1.4374e-09	Far2	0.0022435	0.0352432	0.03	0.005	1	Kcnab1	2.17931e-10	0.22161	0.259	0.159	4.40765e-06	Dusp9	3.84711e-10	0.0515359	0.031	0.001	7.78077e-06	Slc49a4	8.78308e-05	0.333363	0.179	0.068	1
Napb	0.00555834	-0.282533	0.17	0.357	1	Cenpl	6.74937e-05	0.0678918	0.051	0.002	1	Ppp2r2b	0.00039507	-0.451124	0.688	0.893	1	Lcorl	7.75164e-14	0.678545	0.771	0.572	1.48289e-09	Slc4a7	0.00224917	-0.24278	0.98	0.995	1	Cdk2ap1	2.20144e-10	0.160263	0.391	0.264	4.45241e-06	Tle4	4.19531e-10	0.265987	0.336	0.18	8.48502e-06	Impad1	8.89886e-05	0.175075	0.411	0.217	1
Cnot2	0.00559927	0.246553	0.434	0.268	1	Epha10	6.74937e-05	0.0678918	0.051	0.002	1	Oaz1	0.000400877	0.242904	1	1	1	Hunk	8.18488e-14	0.214036	0.163	0.028	1.56577e-09	Plekha1	0.00225353	-0.265397	0.606	0.75	1	Atp11b	2.26343e-10	-0.228728	0.777	0.824	4.5778e-06	Robo2	4.51945e-10	0.316907	0.271	0.13	9.14059e-06	Aplp1	9.17282e-05	0.170231	0.277	0.124	1
Anapc11	0.00576423	0.343287	0.774	0.602	1	Elk3	6.74937e-05	0.0678918	0.051	0.002	1	Kras	0.000442269	-0.534056	0.438	0.651	1	Plekha1	1.21706e-13	0.62392	0.596	0.35	2.32823e-09	Mpped2	0.00225467	-0.244114	0.98	0.963	1	Desi1	2.27029e-10	-0.234278	0.749	0.823	4.59166e-06	Pex5l	4.58038e-10	-0.446094	0.389	0.555	9.26382e-06	Dmrtb1	9.41095e-05	0.291762	0.116	0.032	1
Cpsf7	0.00578058	0.203427	0.358	0.2	1	Six3	6.79417e-05	0.335807	0.759	0.544	1	Tpm4	0.000447574	0.204371	0.271	0.103	1	Nfic	1.25813e-13	-0.575831	0.482	0.772	2.4068e-09	Kif9	0.00227795	-0.246738	0.131	0.263	1	Plpp3	2.30295e-10	0.195434	0.174	0.089	4.65771e-06	Vopp1	4.68666e-10	-0.36408	0.389	0.567	9.47877e-06	Tubb2a	9.50711e-05	0.11846	0.312	0.145	1
Gnb2	0.00580901	0.319339	0.887	0.756	1	Rhob	7.07581e-05	0.252717	0.278	0.112	1	Rraga	0.000479733	-0.365093	1	0.996	1	Arl15	1.62839e-13	0.353686	0.229	0.06	3.11511e-09	Pabpc1	0.00227801	0.179752	0.97	0.936	1	Nrep	2.64663e-10	-0.20337	0.939	0.971	5.3528e-06	Hpx	4.74604e-10	0.0425575	0.027	0.001	9.59887e-06	Dok7	9.55674e-05	0.0823011	0.045	0.004	1
Gngt1	0.00587951	-0.290286	1	0.996	1	Pkm	7.41895e-05	-0.363307	0.962	0.995	1	H2afv	0.000485938	0.288208	1	0.979	1	Ybx3	1.65825e-13	-0.466222	0.922	0.969	3.17223e-09	Nadk2	0.00227971	-0.249039	0.657	0.754	1	9530059O14Rik	2.96618e-10	0.105179	0.075	0.023	5.9991e-06	Kalrn	6.11095e-10	0.144481	0.126	0.038	1.23594e-05	Rpl13a	9.675e-05	0.248924	1	1	1
Dpp7	0.00589695	0.150292	0.17	0.069	1	6530402F18Rik	7.97349e-05	0.198052	0.266	0.103	1	Lcorl	0.000489913	0.405543	0.771	0.55	1	Fzd3	1.98733e-13	0.227126	0.157	0.027	3.80177e-09	Slc39a9	0.00230087	-0.185556	0.03	0.136	1	Atp1a3	3.03486e-10	-0.173732	0.995	0.999	6.13801e-06	Stx3	6.91175e-10	-0.381287	0.641	0.742	1.3979e-05	Rpl13	9.75272e-05	0.221941	1	1	1
Api5	0.00595496	0.283532	0.566	0.393	1	Dyrk2	8.34168e-05	-0.404117	0.734	0.848	1	Rab24	0.00051356	-0.434217	0.271	0.504	1	Map2	2.10915e-13	-0.574114	0.765	0.907	4.03481e-09	Fbl	0.00232706	0.257989	0.545	0.406	1	Dusp5	3.27571e-10	0.232173	0.396	0.281	6.62512e-06	Fam57b	7.57038e-10	-0.374528	0.634	0.739	1.53111e-05	Etnk1	9.84984e-05	-0.334965	0.75	0.88	1
Gadd45b	0.00618391	0.243653	0.226	0.107	1	Pafah1b1	8.35431e-05	0.324748	0.911	0.874	1	Calm3	0.000513675	0.393507	0.792	0.613	1	Rtn1	2.36034e-13	-0.435751	0.036	0.314	4.51532e-09	Sec22c	0.00238279	0.242264	0.596	0.456	1	Calm3	3.54117e-10	0.168299	0.916	0.9	7.16201e-06	Thsd7a	7.57713e-10	0.277987	0.317	0.166	1.53248e-05	Kdm6b	9.85014e-05	0.315727	0.893	0.792	1
Shld1	0.00618625	0.208466	0.321	0.175	1	Timp3	8.36807e-05	0.237388	0.076	0.009	1	Gkap1	0.000515338	0.540044	0.625	0.463	1	Osbp2	2.83121e-13	-0.533952	0.084	0.374	5.4161e-09	Lrpap1	0.00238382	0.227001	0.586	0.437	1	Fyco1	4.12017e-10	-0.201871	0.958	0.981	8.33305e-06	Penk	7.68398e-10	0.0709306	0.038	0.003	1.55409e-05	Tspan7	0.000100056	-0.28267	0.812	0.887	1
Kcnc1	0.0062881	0.156355	0.113	0.037	1	Tbc1d16	8.42123e-05	0.157117	0.152	0.04	1	Arhgef40	0.000521887	0.226476	0.125	0.03	1	Cald1	3.44381e-13	0.419843	0.247	0.07	6.58801e-09	Akap7	0.00239402	-0.21654	0.111	0.249	1	Dlgap1	4.31108e-10	0.2108	0.146	0.071	8.71915e-06	Kmt2a	7.88185e-10	0.277119	0.466	0.28	1.5941e-05	Nt5dc2	0.000100064	0.309677	0.482	0.292	1
Coq5	0.00631739	-0.180944	0.075	0.241	1	Sox4	8.54334e-05	0.61439	0.506	0.308	1	Chchd10	0.000533021	-0.384652	0.938	0.995	1	Ephb2	3.57476e-13	0.348779	0.247	0.07	6.83851e-09	Tmem242	0.00244324	0.187002	0.323	0.193	1	Herc3	4.48941e-10	-0.245286	0.422	0.533	9.07983e-06	Klc1	8.68663e-10	0.287907	0.492	0.303	1.75687e-05	Phgdh	0.000102068	0.289475	0.125	0.038	1
Jtb	0.00635649	0.257854	0.604	0.44	1	Xkr4	8.61776e-05	0.186461	0.114	0.023	1	Gnaz	0.000544834	-0.398717	0.042	0.264	1	Vax2os	3.69921e-13	-0.956011	0.205	0.491	7.07659e-09	Ctnnd2	0.00247777	0.149792	0.121	0.05	1	St3gal5	4.57297e-10	0.256676	0.803	0.733	9.24884e-06	Ldlrad3	9.25877e-10	0.106123	0.103	0.027	1.87259e-05	Tmem108	0.000102864	-0.502281	0.241	0.419	1
Gm38115	0.00647895	0.062675	0.057	0.012	1	Kctd8	8.86219e-05	0.125742	0.076	0.009	1	Enho	0.000578205	0.275302	0.208	0.073	1	Cenpv	3.77231e-13	0.477012	0.361	0.142	7.21644e-09	Slc35g2	0.00255413	0.113508	0.212	0.109	1	Zfp608	4.6939e-10	0.185397	0.345	0.226	9.49341e-06	Fam234b	1.03439e-09	0.0852178	0.065	0.011	2.09206e-05	Egln3	0.000103134	0.148104	0.089	0.02	1
Cask	0.00657636	0.135612	0.358	0.192	1	Mfng	8.98837e-05	0.162052	0.203	0.065	1	Dusp8	0.000583443	0.400223	0.771	0.566	1	Ndufa5	3.95178e-13	-0.423077	0.964	0.99	7.55975e-09	2810403D21Rik	0.00260135	-0.257458	0.101	0.229	1	Kcnb1	4.92969e-10	-0.194386	0.933	0.97	9.97029e-06	Zfp217	1.07155e-09	0.0863891	0.08	0.017	2.1672e-05	Ercc3	0.00010499	-0.406948	0.286	0.478	1
Cul4a	0.00658375	0.216476	0.566	0.371	1	Slc24a2	9.11886e-05	0.109063	0.076	0.009	1	Crxos	0.000586731	0.51052	0.729	0.531	1	Pkm	4.30896e-13	-0.441627	0.97	0.995	8.24305e-09	Brd8	0.00270458	-0.278937	0.737	0.839	1	Tardbp	4.96839e-10	-0.165399	0.844	0.893	1.00486e-05	Txnip	1.12518e-09	0.257205	0.137	0.046	2.27567e-05	Rpl36	0.000105064	0.334304	1	1	1
4931406P16Rik	0.00658638	0.239211	0.811	0.564	1	Aplp2	9.28746e-05	0.364623	0.911	0.79	1	Nrp1	0.000600168	0.233629	0.146	0.04	1	Islr2	4.88288e-13	0.211388	0.078	0.004	9.34095e-09	Zfp689	0.00272229	0.139307	0.141	0.063	1	Rpl18	5.00149e-10	0.16178	1	0.999	1.01155e-05	Rian	1.21874e-09	0.203624	0.183	0.072	2.4649e-05	Npm1	0.000106416	0.24371	0.991	0.962	1
Tmem176b	0.0066822	0.306083	0.736	0.609	1	Unc119	9.28848e-05	-0.262958	1	1	1	Cox4i1	0.000621405	-0.254889	1	1	1	Lgi2	5.1772e-13	0.124806	0.054	0	9.90398e-09	Cd24a	0.00275085	0.188837	0.384	0.241	1	Onecut2	5.09137e-10	0.297088	0.646	0.529	1.02973e-05	Vstm2b	1.28005e-09	0.137292	0.099	0.025	2.5889e-05	Mcm6	0.000107675	0.106056	0.098	0.023	1
Zfp106	0.00668946	0.265767	0.83	0.656	1	Edil3	9.38194e-05	0.0921897	0.076	0.009	1	Ndufb5	0.000643436	-0.376355	0.938	0.976	1	Nckap5	6.13392e-13	0.163232	0.114	0.014	1.17342e-08	Ccnl1	0.00275287	-0.206749	0.848	0.925	1	Crb1	5.11667e-10	-0.256562	0.362	0.467	1.03485e-05	Mgat5	1.36321e-09	0.161577	0.153	0.053	2.7571e-05	Trabd2b	0.000109041	0.0381351	0.027	0	1
Iqgap2	0.00675122	0.100858	0.075	0.019	1	Cxxc4	9.50928e-05	0.418936	0.62	0.404	1	Tox3	0.000644804	0.26565	0.271	0.107	1	Malat1	6.68488e-13	0.569202	1	1	1.27882e-08	Dlc1	0.00279712	-0.220275	0.96	0.979	1	Cdv3	5.45904e-10	0.174034	0.442	0.308	1.10409e-05	Hs3st4	1.42037e-09	0.0966839	0.088	0.02	2.87271e-05	Nkain1	0.000109041	0.0381351	0.027	0	1
Fabp12	0.0069243	-0.333811	0.547	0.722	1	Atp6v0a1	9.63714e-05	0.289352	0.823	0.556	1	Rbm24	0.000664625	0.27104	0.312	0.132	1	Adrb1	6.71637e-13	0.690121	0.566	0.323	1.28484e-08	Gpt	0.00284167	0.116542	0.111	0.044	1	Phactr1	5.97876e-10	-0.196227	0.928	0.949	1.2092e-05	Intu	1.5017e-09	0.384117	0.202	0.087	3.0372e-05	Gm17029	0.000109041	0.0381351	0.027	0	1
Adprm	0.00705894	0.181368	0.245	0.121	1	Zfp423	9.94213e-05	0.1024	0.076	0.009	1	Higd1a	0.000693162	-0.331925	0.667	0.834	1	Slc49a4	6.75544e-13	0.249368	0.175	0.036	1.29232e-08	Gpatch2l	0.00287105	-0.165375	0.091	0.226	1	Gm19667	6.27615e-10	-0.242854	0.112	0.206	1.26935e-05	Zmynd8	1.52637e-09	0.233073	0.439	0.26	3.08708e-05	Fam83g	0.000109041	0.0381351	0.027	0	1
Polh	0.00711934	0.075767	0.075	0.019	1	Spon1	0.000105938	0.189759	0.101	0.019	1	Gdf11	0.000710809	0.160463	0.104	0.023	1	Gabarap	7.99997e-13	0.43201	0.964	0.896	1.5304e-08	Hook3	0.00287409	-0.230828	0.97	0.973	1	Ece1	6.7267e-10	0.202422	0.288	0.184	1.36047e-05	Magi2	1.55092e-09	-0.336536	0.229	0.415	3.13673e-05	Gm40477	0.000109041	0.0381351	0.027	0	1
1110032A03Rik	0.00729136	0.227937	0.509	0.322	1	Ric8b	0.00010883	-0.363472	0.203	0.432	1	Otud1	0.000711944	0.170021	0.167	0.05	1	Xkr4	8.10021e-13	0.181502	0.12	0.016	1.54957e-08	Neurod1	0.00291641	-0.169039	1	1	1	Pip4k2c	7.52283e-10	-0.249266	0.328	0.435	1.52149e-05	Negr1	1.55373e-09	-0.346003	0.26	0.452	3.14242e-05	Mrap	0.000109041	0.0381351	0.027	0	1
Twistnb	0.00729814	0.258378	0.415	0.254	1	Tmem178b	0.00011189	0.215294	0.152	0.042	1	Cycs	0.000713857	-0.418524	0.833	0.907	1	Pde3a	8.75081e-13	0.110784	0.072	0.003	1.67403e-08	Tiam1	0.00292349	0.124917	0.121	0.051	1	Nars	7.76222e-10	0.30403	0.872	0.832	1.56991e-05	H3f3a	1.62855e-09	-0.204152	1	1	3.29375e-05	Cldn5	0.000109045	0.0506261	0.027	0	1
Tub	0.00731257	-0.31542	0.245	0.431	1	Smim20	0.000115362	0.132246	0.089	0.014	1	Mast2	0.000731193	0.174575	0.188	0.061	1	Tal2	9.31193e-13	0.162609	0.06	0.001	1.78137e-08	Cadm2	0.00296781	-0.201726	0.99	0.999	1	Rgs12	7.89534e-10	0.161375	0.183	0.099	1.59683e-05	Ydjc	1.729e-09	0.0829254	0.076	0.016	3.4969e-05	Crebzf	0.000109597	-0.336746	0.732	0.815	1
Stam2	0.00746806	0.16824	0.585	0.38	1	Pex5l	0.000115512	-0.453651	0.506	0.675	1	Mepce	0.00074442	0.260233	0.333	0.151	1	Cox7b	9.41158e-13	-0.482151	0.982	0.992	1.80043e-08	Alox5ap	0.00298126	0.0587628	0.071	0.022	1	Celf3	8.10458e-10	0.16805	0.371	0.243	1.63915e-05	Epha10	1.7841e-09	0.0782218	0.057	0.009	3.60833e-05	Slc7a5	0.000112927	0.419214	0.304	0.163	1
Cds1	0.00755324	-0.211313	0	0.12	1	Adpgk	0.000117207	0.125628	0.101	0.019	1	Zfp213	0.000747926	0.135766	0.104	0.023	1	Gramd3	9.46402e-13	0.0910562	0.06	0.001	1.81047e-08	Tmem38b	0.00301248	0.145126	0.232	0.126	1	Ap2m1	8.44001e-10	-0.164241	0.98	0.992	1.70699e-05	Rtkn2	1.78672e-09	-0.296416	0.153	0.332	3.61364e-05	Dnajb11	0.000114858	0.259992	0.562	0.341	1
Abcd2	0.00755714	0.114412	0.113	0.038	1	Tpbgl	0.000118903	0.1024	0.089	0.014	1	Sbk1	0.000754059	0.289801	0.354	0.168	1	Lrit3	9.52471e-13	0.141314	0.102	0.01	1.82208e-08	Rdx	0.0030422	-0.216221	0.939	0.959	1	Gnat1	8.54232e-10	-0.261045	0.105	0.196	1.72768e-05	Rps14	1.84843e-09	-0.260329	0.989	0.995	3.73844e-05	Rack1	0.000121843	0.248829	1	0.996	1
Usp36	0.00756492	0.119154	0.189	0.081	1	Pank1	0.000118903	0.1024	0.089	0.014	1	Ank3	0.00076373	0.335721	0.396	0.19	1	Sall3	1.03876e-12	0.0976758	0.066	0.002	1.98716e-08	Cebpd	0.0031265	0.218485	0.364	0.237	1	Rpl38	8.63184e-10	0.160645	1	1	1.74579e-05	Fam163b	2.0132e-09	0.0780192	0.046	0.005	4.07169e-05	Nme2	0.00012275	0.263534	0.795	0.706	1
Nudcd3	0.0075769	0.288562	0.528	0.367	1	mt-Nd1	0.000119487	-0.276054	1	1	1	Ndufs4	0.000767188	-0.387523	0.708	0.832	1	Rorb	1.05353e-12	-0.474282	0.867	0.961	2.0154e-08	Sec61a2	0.00317267	-0.313792	0.354	0.47	1	Stard10	9.53725e-10	0.194585	0.293	0.188	1.92891e-05	Cacna1b	2.12467e-09	0.0571102	0.046	0.005	4.29715e-05	Stard7	0.000123485	-0.349921	0.25	0.45	1
Inpp5k	0.00763333	0.158924	0.358	0.199	1	Acly	0.000120165	0.454847	0.494	0.294	1	Sp3os	0.000777285	0.330008	0.396	0.197	1	Ralgapa2	1.58025e-12	0.279877	0.247	0.072	3.02301e-08	Gpr45	0.00323518	0.0426443	0.04	0.009	1	Kansl1l	1.00918e-09	-0.225364	0.693	0.753	2.04107e-05	Cacna1c	2.19444e-09	0.059875	0.046	0.005	4.43825e-05	Ttyh1	0.00012363	-0.345012	0.768	0.842	1
Tmem184b	0.0076545	0.0995986	0.113	0.038	1	Slc1a2	0.000125907	0.434804	0.937	0.834	1	Sirpa	0.000781497	0.495635	0.458	0.272	1	Kalrn	1.59423e-12	0.138327	0.108	0.013	3.04976e-08	Creb3l1	0.00323518	0.0426443	0.04	0.009	1	Cdc37l1	1.01389e-09	-0.18958	0.866	0.911	2.05059e-05	Hmgn1	2.47936e-09	-0.253493	0.985	0.992	5.0145e-05	Gm19667	0.000125878	-0.381437	0.161	0.348	1
Lrp11	0.00772869	0.196998	0.321	0.174	1	Arhgef9	0.000128086	0.267761	0.19	0.063	1	Fam124a	0.000787416	0.153382	0.104	0.023	1	Mtss2	1.68186e-12	0.218032	0.205	0.05	3.21739e-08	Aptx	0.00328196	0.179136	0.303	0.184	1	Tyrp1	1.02281e-09	0.0893052	0.078	0.026	2.06863e-05	Vax2os	2.62407e-09	-0.380523	0.179	0.358	5.30717e-05	Dnm3	0.000132271	-0.403778	0.732	0.821	1
Retreg3	0.00800803	0.183407	0.415	0.243	1	Cald1	0.000129791	0.325383	0.165	0.049	1	Tnfsf13	0.000810692	-0.450972	0.208	0.444	1	Celf4	1.73937e-12	0.597278	0.56	0.316	3.32742e-08	Ndufa1	0.00331471	0.201855	1	0.982	1	Naa35	1.13858e-09	0.211172	0.904	0.846	2.30278e-05	Dpp6	2.76267e-09	0.143624	0.13	0.042	5.5875e-05	Tmem243	0.000132857	-0.329483	0.679	0.771	1
Dcps	0.00806591	0.220394	0.509	0.32	1	Spata13	0.00013023	0.212077	0.165	0.049	1	Kcne2	0.000821268	0.128477	0.062	0.009	1	Bhlhe22	1.86295e-12	0.219983	0.139	0.023	3.56383e-08	Tpp2	0.00335981	-0.22542	0.242	0.395	1	Hist3h2ba	1.15567e-09	0.287712	0.653	0.564	2.33735e-05	Tpd52	3.66753e-09	-0.377494	0.523	0.649	7.41757e-05	Igsf3	0.000135077	0.129139	0.08	0.016	1
Psip1	0.00807046	0.24178	0.943	0.909	1	Fancm	0.000133345	0.14135	0.139	0.035	1	Ndufa5	0.000844832	-0.317213	0.979	0.991	1	Gnai1	2.22102e-12	0.163232	0.114	0.015	4.24882e-08	Atp5md	0.00356524	0.174424	0.99	0.999	1	Grk1	1.19529e-09	-0.273638	0.472	0.547	2.41748e-05	Pcbp2	3.66844e-09	-0.291176	0.885	0.913	7.41942e-05	4930453N24Rik	0.000135906	-0.338922	0.152	0.33	1
Pde4d	0.00812259	0.0710304	0.038	0.006	1	Zeb2	0.000136702	0.313698	0.342	0.161	1	Gm5577	0.000907045	0.13751	0.042	0.004	1	Klhl5	2.23907e-12	0.164521	0.096	0.009	4.28334e-08	6430590A07Rik	0.0035737	-0.277716	0.485	0.601	1	Ttc32	1.2045e-09	0.11257	0.117	0.051	2.43609e-05	Osbpl6	3.75106e-09	0.133264	0.118	0.036	7.58652e-05	Trio	0.000136196	0.32513	0.304	0.158	1
Asna1	0.00828699	-0.302724	0.302	0.469	1	Dpysl2	0.000137857	0.1844	0.241	0.091	1	Gng8	0.000914553	0.240669	0.042	0.004	1	Dll1	2.46916e-12	0.169361	0.12	0.017	4.72351e-08	Ccnjl	0.00361019	0.0911926	0.071	0.023	1	Nr3c1	1.20494e-09	-0.240581	0.669	0.712	2.43698e-05	Celf2	4.01005e-09	-0.382559	0.557	0.694	8.11032e-05	Atp5mpl	0.000137816	-0.279031	1	1	1
Gm14327	0.00834416	0.0450352	0.038	0.006	1	Sox12	0.000138909	0.356766	0.506	0.304	1	Zfp965	0.000929655	0.0534461	0.042	0.004	1	Hsp90ab1	2.66992e-12	0.438901	0.994	0.992	5.10755e-08	Dpysl3	0.00369082	-0.169677	0.97	0.986	1	Rap1a	1.23377e-09	0.15764	0.492	0.349	2.49529e-05	Myt1l	4.03218e-09	0.121877	0.115	0.034	8.15507e-05	F5	0.000142456	0.0604266	0.036	0.002	1
Gm16638	0.00834416	0.0450352	0.038	0.006	1	Foxn3	0.000140617	0.200647	0.278	0.114	1	Gm17655	0.000929655	0.0534461	0.042	0.004	1	Lgr5	2.80005e-12	0.121154	0.096	0.009	5.3565e-08	Gpr137	0.00370107	-0.192645	0.051	0.159	1	Chchd3	1.29151e-09	-0.192096	0.796	0.85	2.61208e-05	Hmgn2	4.0356e-09	-0.290221	0.859	0.887	8.16201e-05	Arpc2	0.00014958	0.236499	0.982	0.914	1
Gm28586	0.00834416	0.0450352	0.038	0.006	1	Zdbf2	0.000148607	0.288309	0.266	0.11	1	Gm34885	0.000929655	0.0534461	0.042	0.004	1	Rpl13a	2.85073e-12	0.341493	1	0.999	5.45345e-08	Ogt	0.00370588	-0.233633	0.909	0.953	1	Wwc1	1.41676e-09	0.230151	0.299	0.199	2.8654e-05	Acsl5	4.1385e-09	0.0810923	0.069	0.013	8.37011e-05	Ubtd1	0.000151684	-0.369418	0.161	0.326	1
Tgm4	0.00834416	0.0450352	0.038	0.006	1	Scg2	0.000153161	-0.606238	0.101	0.308	1	Hes7	0.000929655	0.0534461	0.042	0.004	1	Gnb5	3.11198e-12	-0.47201	0.476	0.737	5.95322e-08	Ubac1	0.00371677	-0.248908	0.192	0.329	1	Rps17	1.45563e-09	0.148898	1	1	2.94401e-05	Gnb3	4.37133e-09	-0.31509	0.817	0.846	8.84102e-05	Lars	0.000152346	0.389117	0.491	0.321	1
Gm47732	0.00834416	0.0450352	0.038	0.006	1	Khdrbs3	0.000154151	0.320117	0.62	0.402	1	Sat2	0.000929655	0.0534461	0.042	0.004	1	Scg3	3.28236e-12	0.564842	0.548	0.31	6.27916e-08	Selenow	0.00372319	0.176767	0.98	0.977	1	Zbtb7c	1.54315e-09	0.188877	0.387	0.271	3.12102e-05	Glo1	4.62094e-09	-0.297116	0.859	0.882	9.34586e-05	Rpl29	0.000154214	0.244591	0.938	0.864	1
Dennd3	0.00834416	0.0450352	0.038	0.006	1	Atp2b1	0.000156497	0.476932	0.886	0.841	1	Xrcc3	0.000929655	0.0534461	0.042	0.004	1	Car2	3.81326e-12	-0.612784	0.554	0.743	7.29477e-08	Slc35a1	0.00373575	-0.242789	0.131	0.259	1	Car2	1.58038e-09	-0.20273	0.918	0.952	3.19633e-05	Gm43113	4.77549e-09	0.0408886	0.031	0.002	9.65843e-05	Sat2	0.000157816	0.119121	0.107	0.029	1
2010106G04Rik	0.00834416	0.0450352	0.038	0.006	1	Tcaf1	0.000156863	0.32315	0.329	0.159	1	A930006K02Rik	0.000929655	0.0534461	0.042	0.004	1	Hist3h2ba	4.06931e-12	0.409781	0.175	0.039	7.7846e-08	Ldha	0.00378506	-0.171056	1	1	1	Bri3	1.60656e-09	0.160695	0.932	0.902	3.24927e-05	Il17rc	4.77549e-09	0.0408886	0.031	0.002	9.65843e-05	Rpl11	0.000158432	0.247278	1	1	1
Tbx6	0.00841947	0.0436393	0.038	0.006	1	Atp5c1	0.000168423	-0.300221	0.987	0.993	1	Rgs16	0.000929705	0.0747837	0.042	0.004	1	Rpl10	4.20407e-12	0.689486	0.97	0.91	8.04239e-08	Cd164	0.00381304	-0.328088	0.485	0.566	1	Rhob	1.62142e-09	0.249125	0.279	0.18	3.27933e-05	Ubr4	4.77956e-09	0.237739	0.302	0.159	9.66665e-05	Gabarap	0.000158798	0.373437	1	0.984	1
Gm49077	0.00841947	0.0436393	0.038	0.006	1	Ubtd2	0.000168583	0.138376	0.127	0.03	1	Tnfaip8	0.000929705	0.078395	0.042	0.004	1	Setbp1	4.40458e-12	0.255829	0.187	0.044	8.42596e-08	E130310I04Rik	0.00381536	-0.272253	0.424	0.548	1	Rpl3	1.77125e-09	0.150691	1	0.999	3.58236e-05	Rgma	4.83286e-09	0.089995	0.084	0.02	9.77446e-05	Negr1	0.000159458	-0.381938	0.607	0.722	1
Gmeb1	0.00842382	0.206381	0.302	0.164	1	C2cd4b	0.000171817	0.384421	0.177	0.056	1	Lamtor5	0.000931028	0.334052	0.875	0.697	1	Ptprz1	5.2551e-12	0.202389	0.108	0.014	1.0053e-07	Rbm39	0.00384441	-0.1824	1	1	1	Osbpl6	1.80184e-09	0.163387	0.177	0.095	3.64422e-05	Fgfr1	5.10398e-09	0.0934144	0.088	0.021	0.000103228	Fosb	0.000161752	0.167675	0.42	0.231	1
Usp45	0.00850402	0.150292	0.151	0.06	1	Pcm1	0.00017268	0.383443	0.848	0.715	1	Pgk1	0.000946977	-0.513377	0.646	0.777	1	Sh3bgrl3	5.37277e-12	0.477152	0.566	0.326	1.02781e-07	Gm9844	0.00388065	0.0892457	0.081	0.028	1	Smoc2	1.88373e-09	0.104288	0.086	0.031	3.80984e-05	Rnf121	5.1672e-09	-0.481004	0.389	0.563	0.000104507	4430402I18Rik	0.00016251	-0.384978	0.295	0.475	1
Fopnl	0.00865218	-0.237271	0.151	0.328	1	Rp9	0.000173151	0.346833	0.582	0.379	1	Selenbp1	0.000952029	-0.574702	0.333	0.55	1	Serbp1	5.52989e-12	0.466921	0.976	0.946	1.05787e-07	Pdk1	0.0039052	0.0609454	0.071	0.023	1	Vipr2	1.93779e-09	-0.229537	0.148	0.246	3.91918e-05	Rbfox2	5.56299e-09	0.167006	0.183	0.074	0.000112512	Islr2	0.000163073	0.204557	0.107	0.029	1
Arhgef11	0.00865558	0.2495	0.377	0.233	1	Igf2r	0.000173328	0.177819	0.165	0.049	1	Uqcr11	0.000955052	-0.307488	1	0.999	1	Nt5dc2	5.66497e-12	0.415541	0.301	0.111	1.08371e-07	Malt1	0.00398741	-0.254856	0.202	0.34	1	Gpr137c	2.01586e-09	0.24074	0.815	0.756	4.07707e-05	AI593442	6.60098e-09	0.14682	0.122	0.039	0.000133505	Gpt2	0.000163753	0.197123	0.098	0.025	1
Slu7	0.00866126	-0.2948	0.151	0.311	1	Klf12	0.000176277	0.182429	0.139	0.037	1	mt-Nd1	0.000964819	-0.293663	1	1	1	Oser1	5.91605e-12	0.387027	0.572	0.304	1.13174e-07	Pik3r1	0.00399833	-0.248361	1	0.995	1	Pdzd11	2.06015e-09	0.193519	0.477	0.354	4.16665e-05	Cacnb3	6.84519e-09	0.140484	0.118	0.037	0.000138444	Rpl24	0.000164459	0.238133	1	1	1
Tmem107	0.00890431	0.215839	0.547	0.373	1	Cuedc1	0.000183066	0.507988	0.671	0.498	1	Rs1	0.00101011	-0.497944	0.521	0.749	1	Gm49878	6.25069e-12	0.112771	0.09	0.008	1.19576e-07	Gm43387	0.00405497	0.077421	0.051	0.013	1	Vax2os	2.36647e-09	-0.432084	0.531	0.572	4.78618e-05	Gpc1	6.9493e-09	0.107748	0.099	0.027	0.00014055	Mbnl1	0.000164767	-0.399148	0.402	0.57	1
Lpcat1	0.00894413	-0.293989	0.264	0.44	1	Ptpn1	0.000184966	0.312629	0.443	0.248	1	Atp5l	0.00101188	-0.274683	1	1	1	Uqcr10	6.31378e-12	-0.43181	0.91	0.968	1.20783e-07	Hpgds	0.00406737	0.124477	0.283	0.163	1	Dst	2.49839e-09	0.194615	0.253	0.156	5.053e-05	Atp1b2	6.97734e-09	-0.298407	0.866	0.871	0.000141117	P4hb	0.000165099	0.28082	0.545	0.344	1
Lamtor4	0.00903201	0.234179	0.887	0.767	1	Dtna	0.000185586	0.196678	0.203	0.07	1	Zdhhc3	0.00102092	-0.325754	0.062	0.276	1	Pfkl	6.70537e-12	-0.513623	0.337	0.628	1.28274e-07	Tra2a	0.00416181	-0.214163	0.97	0.97	1	Mllt11	2.58354e-09	0.11338	0.3	0.187	5.2252e-05	Rbfox1	7.214e-09	0.0858702	0.05	0.007	0.000145903	Fam53b	0.000166387	-0.34179	0.411	0.579	1
Slc43a2	0.00903469	0.128887	0.132	0.05	1	Tfcp2	0.000186949	0.216314	0.228	0.086	1	Nt5dc2	0.00104101	0.250175	0.25	0.101	1	Lonrf1	7.11685e-12	0.198002	0.157	0.031	1.36145e-07	Ly75	0.00419391	0.0537849	0.02	0.002	1	Leprotl1	2.76501e-09	0.231687	0.451	0.328	5.59224e-05	Six3	7.27915e-09	0.254253	0.527	0.339	0.000147221	Fam50a	0.000166992	0.325547	0.464	0.29	1
Dapk1	0.00904582	0.099482	0.075	0.02	1	Rtbdn	0.000189838	-0.518921	0.481	0.643	1	Aco2	0.00107131	-0.439502	0.542	0.733	1	Olfm1	7.57176e-12	0.657584	0.53	0.306	1.44848e-07	Fmo2	0.00424398	0.0537849	0.02	0.002	1	Hnrnpf	2.76512e-09	-0.163492	0.995	0.996	5.59245e-05	Rnf130	7.45439e-09	0.157763	0.195	0.082	0.000150765	Otub1	0.000171192	0.221189	0.643	0.409	1
Meis1	0.00909327	0.246876	0.491	0.318	1	Rab30	0.000191682	0.278488	0.392	0.206	1	Ninj1	0.00107223	0.170575	0.125	0.033	1	Serinc1	7.82413e-12	0.442155	0.735	0.519	1.49676e-07	Gm37107	0.00424398	0.0397097	0.02	0.002	1	Sars	2.8343e-09	0.368516	0.875	0.862	5.73237e-05	Dab2ip	7.5577e-09	0.20657	0.282	0.144	0.000152854	Ralgps1	0.000181013	-0.347848	0.152	0.328	1
Fbxw7	0.00910086	-0.248382	0.057	0.2	1	Vamp4	0.00019554	0.234923	0.342	0.164	1	Tmem128	0.0010768	0.269974	0.5	0.279	1	Ebf3	8.55601e-12	0.110784	0.072	0.004	1.63676e-07	Gm14401	0.00424398	0.0397097	0.02	0.002	1	Rps27a	2.87934e-09	0.137258	1	1	5.82347e-05	Cbfa2t3	7.56887e-09	0.068671	0.05	0.007	0.00015308	Slc4a5	0.000182242	0.42432	0.232	0.108	1
Gpnmb	0.00929716	0.095548	0.113	0.039	1	Chgb	0.000202572	0.41055	1	0.995	1	Atp6v0e2	0.00111221	-0.360387	0.25	0.503	1	Dixdc1	8.82539e-12	0.573083	0.5	0.27	1.6883e-07	Styxl1	0.00424398	0.0397097	0.02	0.002	1	Dctn3	2.9109e-09	0.156462	0.965	0.925	5.8873e-05	Pcdh10	7.80013e-09	0.12097	0.092	0.024	0.000157758	Abat	0.000182276	0.188733	0.098	0.025	1
Camkk2	0.00934994	0.151604	0.151	0.061	1	Dusp16	0.000211532	0.26485	0.278	0.121	1	Cpeb3	0.00111267	0.200519	0.229	0.087	1	Casz1	1.07017e-11	-0.490216	0.837	0.933	2.04724e-07	Itgb4	0.00424398	0.0397097	0.02	0.002	1	Rasa2	2.9488e-09	0.230098	0.699	0.583	5.96396e-05	Clip2	7.94663e-09	0.0847478	0.08	0.019	0.000160721	E130310I04Rik	0.000183158	-0.410456	0.241	0.416	1
Mastl	0.00938234	0.145688	0.132	0.05	1	Uqcrb	0.00021575	-0.293456	0.975	0.993	1	Slc6a2	0.00116113	0.156918	0.104	0.024	1	Gulp1	1.25321e-11	-0.441403	0.072	0.332	2.39738e-07	Lsmem1	0.00424398	0.0397097	0.02	0.002	1	Rps12	3.0348e-09	0.148536	1	1	6.13789e-05	Rpl41	8.43774e-09	-0.209278	0.996	0.999	0.000170653	Plk5	0.000183311	-0.278523	0.036	0.172	1
Cyp46a1	0.00946392	0.123279	0.17	0.072	1	Rreb1	0.000217194	0.272779	0.443	0.236	1	Mrpl42	0.00116311	-0.328401	0.417	0.671	1	Tgfb2	1.38583e-11	0.652297	0.139	0.026	2.6511e-07	B3gntl1	0.00427114	0.0675131	0.061	0.018	1	mt-Co3	3.41883e-09	0.189284	1	1	6.91458e-05	Gm43111	9.30031e-09	0.0417228	0.027	0.001	0.000188099	Rps20	0.000185675	0.273445	1	1	1
Rnf34	0.00960299	0.145226	0.302	0.161	1	Scgn	0.000220677	0.190593	0.063	0.007	1	Nrd1	0.00117794	-0.367587	0.312	0.576	1	Cd63	1.39147e-11	0.454628	0.97	0.87	2.66188e-07	Suclg1	0.00427188	-0.224843	0.768	0.87	1	Chrna3	3.41917e-09	0.221059	0.336	0.236	6.91527e-05	Ptpn3	9.35471e-09	0.0363696	0.027	0.001	0.000189199	Rpl23a	0.000187447	0.219142	1	1	1
Angpt1	0.00960376	0.0840505	0.057	0.013	1	Atxn1	0.000225045	0.328487	0.367	0.187	1	Man1a2	0.00117855	0.273162	0.438	0.236	1	Casp7	1.40215e-11	0.196359	0.066	0.003	2.68231e-07	A230077H06Rik	0.0042777	0.0385918	0.02	0.002	1	Aldh1l2	3.45517e-09	0.151826	0.071	0.024	6.98808e-05	Fstl4	9.35471e-09	0.0363696	0.027	0.001	0.000189199	Prxl2a	0.00019276	0.356546	0.625	0.457	1
Gm26954	0.00964199	0.11164	0.151	0.06	1	Dcxr	0.000225702	0.0955331	0.063	0.007	1	Lyar	0.00121187	-0.463272	0.5	0.729	1	Dennd5b	1.47462e-11	0.318983	0.313	0.116	2.82094e-07	Shroom1	0.00429458	0.0254959	0.02	0.002	1	Mtnr1a	3.70022e-09	0.082001	0.058	0.016	7.48369e-05	Flrt1	9.35471e-09	0.0363696	0.027	0.001	0.000189199	Btbd7	0.000193872	-0.238201	0.652	0.79	1
Gldc	0.00966878	0.247262	0.396	0.242	1	Kif21a	0.000225858	0.457267	0.696	0.488	1	Atp5j	0.00123185	-0.306365	0.979	0.999	1	Lmo4	1.61308e-11	0.248237	0.211	0.058	3.08582e-07	Fmnl1	0.00429458	0.0254959	0.02	0.002	1	Filip1l	3.82205e-09	0.136194	0.075	0.025	7.73009e-05	Slc17a7	9.36085e-09	-0.355722	0.626	0.741	0.000189323	Ndrg3	0.00019402	-0.350028	0.786	0.864	1
Stam	0.00974135	0.267958	0.528	0.37	1	Sh3rf1	0.000230863	0.0784596	0.063	0.007	1	Rtbdn	0.00123815	-0.443274	0.5	0.731	1	Cd59a	1.61953e-11	0.185953	0.102	0.013	3.09816e-07	Hydin	0.00429458	0.0254959	0.02	0.002	1	Cryab	4.09129e-09	0.227356	0.248	0.15	8.27464e-05	Irs2	9.46066e-09	0.134126	0.183	0.074	0.000191342	Slc24a1	0.000194755	-0.408677	0.125	0.289	1
Slc24a1	0.00976415	-0.402711	0.094	0.245	1	Dclk3	0.000239839	0.0751162	0.063	0.007	1	Sowahc	0.00125697	0.197145	0.083	0.016	1	Parvb	1.66821e-11	0.244825	0.181	0.043	3.19129e-07	Gm47658	0.00429458	0.0254959	0.02	0.002	1	Cebpg	4.19722e-09	0.395013	0.391	0.293	8.48887e-05	Gm43566	9.60143e-09	0.0689065	0.061	0.011	0.000194189	Nfe2l1	0.000200144	0.267649	0.643	0.41	1
Ybx3	0.0097732	-0.222235	0.925	0.966	1	Fam184b	0.000242918	0.333891	0.354	0.178	1	Atp5c1	0.00128558	-0.308135	0.958	0.984	1	Agpat3	1.69938e-11	-0.424068	0.88	0.964	3.25091e-07	Fam83d	0.00431164	0.0374747	0.02	0.002	1	Rrp1b	4.39885e-09	-0.27158	0.322	0.421	8.89668e-05	Txnrd1	1.00106e-08	0.160367	0.214	0.095	0.000202465	Crx	0.000200232	-0.244087	0.982	0.996	1
Wdr3	0.00980974	0.11275	0.189	0.083	1	Mrps34	0.000249339	-0.29996	0.253	0.474	1	Klhdc8b	0.00128799	-0.352224	0.125	0.358	1	Kcnb2	1.79777e-11	0.0910562	0.054	0.001	3.43913e-07	Apol8	0.00432868	0.0243779	0.02	0.002	1	Rpl39	4.41169e-09	0.151245	1	1	8.92265e-05	Prrc2b	1.00692e-08	0.217948	0.557	0.36	0.000203649	Wfikkn2	0.000202482	0.106056	0.098	0.025	1
Zic2	0.00983484	0.148347	0.132	0.051	1	Tln2	0.000249653	0.323614	0.608	0.409	1	Gm32629	0.00129621	0.141106	0.083	0.016	1	Glrx	1.82436e-11	0.276731	0.277	0.094	3.49e-07	Synj1	0.0043593	-0.287425	0.545	0.627	1	Dlg4	4.59433e-09	-0.202566	0.914	0.928	9.29203e-05	Aipl1	1.15626e-08	-0.355345	0.645	0.726	0.000233853	Zranb1	0.000206797	-0.294801	0.964	0.996	1
Milr1	0.00987721	0.0612871	0.057	0.013	1	Ppm1l	0.000250169	0.186598	0.177	0.058	1	Tprn	0.00129811	0.10171	0.104	0.024	1	Clic4	2.01928e-11	0.286158	0.337	0.13	3.86288e-07	Prph	0.00436653	0.048836	0.051	0.013	1	Six6	4.6031e-09	0.152026	0.496	0.363	9.30977e-05	Kif1a	1.18385e-08	0.24756	0.401	0.243	0.000239434	Rpl3	0.000213697	0.25196	1	1	1
Fkbp11	0.00987721	0.0612871	0.057	0.013	1	Map2	0.000256687	-0.414252	0.772	0.914	1	E130308A19Rik	0.00132074	0.301075	0.25	0.103	1	Hmgb3	2.02305e-11	0.471921	0.614	0.387	3.8701e-07	Rhobtb1	0.00448315	0.160412	0.202	0.11	1	Ppef2	4.83381e-09	-0.215625	0.323	0.427	9.77637e-05	Mical3	1.19174e-08	0.159836	0.156	0.06	0.00024103	Suclg2	0.000213793	0.0892307	0.054	0.007	1
Agap1	0.00990178	0.302753	0.377	0.241	1	Agpat5	0.000262688	0.384575	0.835	0.671	1	Mars2	0.00134207	0.115924	0.083	0.016	1	Adcy2	2.13654e-11	0.166395	0.12	0.019	4.0872e-07	Bcar1	0.00470427	0.129115	0.222	0.122	1	Rpl8	4.85345e-09	0.128236	1	1	9.81609e-05	Xkr6	1.24064e-08	0.228079	0.317	0.171	0.000250919	Tiprl	0.00021613	0.241733	0.464	0.274	1
Uhrf1bp1l	0.00997067	0.0599006	0.057	0.013	1	Ndufaf7	0.000265624	0.235521	0.392	0.206	1	Idh2	0.00135549	0.205437	0.312	0.14	1	Dusp5	2.32154e-11	0.359658	0.319	0.124	4.44111e-07	Nova2	0.00470575	0.112261	0.091	0.034	1	Luc7l3	4.92613e-09	-0.160419	0.992	0.989	9.9631e-05	Armcx4	1.26116e-08	0.163412	0.168	0.067	0.00025507	Gchfr	0.000218169	0.174227	0.089	0.022	1
Mapk7	0.00997067	0.0599006	0.057	0.013	1	Slc25a5	0.000274292	-0.373883	0.899	0.951	1	Epha5	0.00135863	0.49373	0.708	0.526	1	Inhbb	2.54299e-11	0.286298	0.253	0.082	4.86475e-07	Camk4	0.00471513	0.111151	0.081	0.029	1	Mak	5.00668e-09	-0.187054	0.958	0.975	0.00010126	Dlg2	1.28709e-08	-0.287679	0.137	0.302	0.000260315	Rnaset2a	0.000222483	0.125204	0.089	0.022	1
A230087F16Rik	0.00997067	0.0599006	0.057	0.013	1	Gnat2	0.000274396	0.30882	0.076	0.012	1	Ephb2	0.00136454	0.309813	0.188	0.068	1	Nt5e	2.74972e-11	-0.485582	0.277	0.559	5.26021e-07	Hmmr	0.00472054	0.0759489	0.03	0.005	1	Rps13	5.10026e-09	0.13792	1	1	0.000103153	Cnih3	1.31376e-08	0.0425575	0.023	0.001	0.000265708	Snhg6	0.000233703	0.336095	0.661	0.482	1
Plag1	0.00999826	0.150769	0.226	0.11	1	Epha7	0.000276751	0.122331	0.101	0.021	1	Klf10	0.00137609	-0.396157	0.167	0.396	1	Samd14	2.85759e-11	0.190778	0.175	0.041	5.46656e-07	5330417C22Rik	0.00473365	0.0621431	0.03	0.005	1	Lig1	5.24316e-09	0.153718	0.195	0.111	0.000106043	Wdr95	1.31376e-08	0.0478909	0.023	0.001	0.000265708	Phactr1	0.000241868	-0.291768	0.857	0.943	1
Entr1	0.0100458	0.177967	0.283	0.15	1	Dlgap1	0.000299022	0.145235	0.089	0.016	1	Sh3gl1	0.001389	0.339946	0.396	0.222	1	Gpi1	2.87152e-11	-0.47314	0.548	0.784	5.49321e-07	Grm6	0.00474256	0.169178	0.202	0.107	1	Ap2a2	5.36643e-09	-0.198434	0.82	0.864	0.000108536	Inava	1.32238e-08	0.0318311	0.023	0.001	0.000267452	Vegfa	0.000241982	0.559165	0.402	0.256	1
Nme1	0.0100624	0.2709	0.792	0.718	1	Wdr27	0.000303871	-0.307878	0.152	0.355	1	Spsb1	0.00139495	0.135893	0.167	0.053	1	Ndufs6	2.94846e-11	-0.382573	0.867	0.932	5.6404e-07	Parp4	0.00476204	0.0846398	0.071	0.023	1	Rplp0	5.52078e-09	0.157568	1	0.998	0.000111658	Gm15338	1.32238e-08	0.0318311	0.023	0.001	0.000267452	Rps24	0.00024608	0.250615	1	1	1
Arid3c	0.0100649	0.0585154	0.057	0.013	1	Serinc5	0.000306617	0.27218	0.266	0.117	1	Zfp579	0.00141002	0.268813	0.417	0.222	1	Pgrmc2	2.99656e-11	-0.510351	0.277	0.527	5.73242e-07	Cdh9	0.00477325	0.0873974	0.03	0.005	1	Rpl27a	5.53787e-09	0.135264	1	1	0.000112003	2025-03-11	1.33465e-08	0.0661872	0.057	0.01	0.000269933	Grk1	0.000248943	-0.333844	0.286	0.48	1
Sdf2	0.0101199	0.224017	0.679	0.488	1	Uba52	0.00030894	-0.346585	0.797	0.881	1	Ccdc107	0.00142542	0.420317	0.896	0.817	1	E130218I03Rik	3.33e-11	-0.459034	0.169	0.449	6.37029e-07	Ldlrad3	0.00477449	0.170154	0.141	0.067	1	Rplp1	5.57329e-09	0.154611	1	1	0.00011272	Fam102b	1.3875e-08	0.175005	0.168	0.067	0.000280622	Mrpl24	0.000253134	0.171588	0.536	0.314	1
Tmsb4x	0.0101206	0.400941	0.981	0.977	1	Elmsan1	0.000311683	0.105728	0.076	0.012	1	Cox5a	0.00143063	-0.295229	0.979	0.986	1	Gnaq	3.39803e-11	0.408454	0.458	0.229	6.50043e-07	Plscr1	0.00478629	0.0493183	0.03	0.005	1	Stat3	5.57737e-09	0.174691	0.561	0.422	0.000112802	Smpd3	1.45578e-08	0.199141	0.21	0.094	0.000294432	Rps12	0.000256648	0.259441	1	1	1
Ric8a	0.0101284	0.132505	0.226	0.109	1	Gm47320	0.000311808	0.135567	0.076	0.012	1	Hgsnat	0.00146341	0.194882	0.208	0.077	1	Supt3	3.57612e-11	0.234189	0.229	0.068	6.84112e-07	Aldh1a1	0.00478629	0.0493183	0.03	0.005	1	Etnk1	5.74344e-09	-0.177796	0.852	0.897	0.000116161	Apba2	1.57101e-08	0.204309	0.195	0.085	0.000317736	Slc1a3	0.00026187	0.153183	0.25	0.113	1
Herc3	0.010193	-0.276041	0.321	0.52	1	Slc35c2	0.000313441	0.228969	0.291	0.133	1	Gm3728	0.00146414	0.0866584	0.083	0.016	1	Cbx5	3.5973e-11	0.378701	0.398	0.179	6.88164e-07	Trerf1	0.00479259	0.141398	0.131	0.06	1	Dlc1	5.76062e-09	-0.204558	0.968	0.981	0.000116509	Inpp5f	1.63696e-08	0.154045	0.187	0.079	0.000331076	Slc25a15	0.000264276	0.149388	0.071	0.014	1
Osbp2	0.0102076	-0.2814	0.189	0.381	1	Gnas	0.00031408	0.285822	0.987	0.977	1	Desi1	0.00148283	-0.366071	0.396	0.642	1	Lima1	3.62404e-11	0.193628	0.145	0.028	6.9328e-07	Gm10629	0.00482631	0.0482039	0.03	0.005	1	Rpl24	5.92398e-09	0.141983	1	1	0.000119813	Fkbp5	1.67791e-08	0.135667	0.156	0.06	0.000339357	Msn	0.000264768	0.132804	0.08	0.018	1
Tomm40	0.010299	0.270002	0.566	0.413	1	Pfas	0.000321683	0.088854	0.076	0.012	1	Ndufc1	0.00149141	-0.317959	0.979	0.994	1	Cxxc5	3.84714e-11	0.502584	0.819	0.671	7.35959e-07	Rai14	0.00483739	0.123939	0.101	0.04	1	Gdf15	5.9341e-09	0.236349	0.106	0.047	0.000120017	Sorbs1	1.80081e-08	0.174262	0.191	0.082	0.000364214	Psd3	0.000265004	0.239523	0.214	0.097	1
Bnip3l	0.0103776	0.220825	0.887	0.791	1	Fuca2	0.000323371	0.0990794	0.089	0.016	1	Car2	0.00150681	-0.422879	0.625	0.811	1	Pax6	4.45526e-11	0.215176	0.175	0.042	8.5229e-07	Ccdc28a	0.0049069	-0.19877	0.101	0.22	1	4930578M01Rik	5.98853e-09	0.203251	0.609	0.474	0.000121118	Psme1	1.80603e-08	0.255315	0.244	0.122	0.000365271	Mtnr1a	0.000267427	0.146841	0.062	0.011	1
Tlk2	0.0104857	0.248879	0.642	0.521	1	Cr1l	0.000323585	0.112445	0.089	0.016	1	Ptgds	0.00158011	1.18435	0.146	0.047	1	Efnb3	4.55979e-11	0.132	0.096	0.012	8.72289e-07	Alas1	0.00491914	-0.176878	0.101	0.222	1	Ankrd12	5.99897e-09	-0.152016	0.998	1	0.000121329	Malat1	1.82815e-08	0.272467	1	1	0.000369743	Pcare	0.000269429	-0.297147	0.179	0.358	1
Cyb5r3	0.0104902	0.199006	0.208	0.1	1	Atp5j2	0.000323667	-0.24	0.987	1	1	Dusp22	0.00161572	-0.374629	0.208	0.446	1	Ptpn13	4.56149e-11	0.241196	0.223	0.066	8.72613e-07	Palmd	0.00492058	0.0341287	0.03	0.005	1	6430590A07Rik	6.12763e-09	-0.242972	0.41	0.502	0.000123931	Rpl10a	1.8918e-08	-0.236927	0.973	0.988	0.000382616	Eef2	0.000270365	0.287019	1	0.987	1
Vkorc1l1	0.0104922	0.151875	0.264	0.136	1	Rasal2	0.000331021	0.325882	0.354	0.187	1	Aftph	0.00162221	0.223622	0.479	0.257	1	Pitpnm3	4.81696e-11	-0.453487	0.343	0.617	9.21485e-07	4930412C18Rik	0.00492058	0.0330151	0.03	0.005	1	Tmem215	6.60583e-09	0.243135	0.32	0.223	0.000133603	Plxna1	1.90565e-08	0.110449	0.111	0.034	0.000385417	Grina	0.000270641	-0.25329	0.946	0.984	1
Pgm1	0.0105276	0.186188	0.585	0.395	1	Ryr2	0.000336513	0.308403	0.342	0.173	1	Strbp	0.00162428	-0.435848	0.896	0.902	1	Pkdcc	4.86481e-11	0.233321	0.102	0.014	9.30638e-07	Gm46411	0.00492058	0.0341287	0.03	0.005	1	Rpl6	6.8746e-09	0.133462	1	1	0.000139039	Rhpn2	1.98041e-08	0.0718353	0.069	0.014	0.000400538	Tle4	0.000271918	0.552395	0.589	0.407	1
Efr3a	0.0106001	-0.307911	0.358	0.523	1	Nrep	0.00034074	-0.370742	0.633	0.792	1	Rccd1	0.00163202	0.139324	0.125	0.034	1	Atxn7l3b	4.98838e-11	0.406305	0.976	0.951	9.54277e-07	Gm49064	0.00492058	0.0341287	0.03	0.005	1	Rps3	6.98728e-09	0.123505	1	1	0.000141318	Aplp1	2.05984e-08	0.206764	0.29	0.152	0.000416603	Timp2	0.000277719	0.143617	0.295	0.147	1
Plrg1	0.0106752	0.142841	0.302	0.163	1	Morf4l2	0.000353832	0.316168	0.658	0.472	1	Tmem250-ps	0.00163978	0.141042	0.167	0.054	1	Asrgl1	5.25761e-11	-0.405243	0.06	0.311	1.00578e-06	Gm50114	0.00492058	0.0341287	0.03	0.005	1	Gm3716	7.32244e-09	0.113646	0.08	0.03	0.000148096	Gga2	2.09657e-08	0.137255	0.134	0.047	0.000424032	Rps3	0.000281509	0.22166	1	1	1
Eif4a1	0.0106809	-0.246926	0.906	0.94	1	Cox5a	0.000354224	-0.272853	0.987	0.981	1	Rlbp1	0.00164725	0.117926	0.188	0.066	1	Ppp3ca	5.40945e-11	0.444405	0.922	0.828	1.03483e-06	Nav3	0.00492339	0.0723094	0.071	0.023	1	Slc7a3	7.34557e-09	0.150719	0.07	0.024	0.000148564	Fyco1	2.11529e-08	-0.322655	0.355	0.527	0.000427817	Ddhd2	0.000285718	0.240999	0.223	0.102	1
Lsg1	0.0106847	0.187625	0.264	0.14	1	Lipa	0.000366467	0.19221	0.114	0.028	1	Cpe	0.00168689	-0.445333	0.688	0.794	1	Dcxr	5.46706e-11	0.152349	0.102	0.014	1.04585e-06	Tpgs1	0.00492726	0.217951	0.384	0.258	1	Tmem30a	7.93766e-09	-0.193924	0.762	0.821	0.000160539	Dusp10	2.17653e-08	0.0689065	0.061	0.012	0.000440202	Cited4	0.00029262	0.121216	0.071	0.014	1
Mamld1	0.0109843	0.236397	0.358	0.214	1	Naa35	0.000368119	0.50113	0.696	0.507	1	Psmd2	0.00171314	0.32479	0.688	0.491	1	Tet1	5.52471e-11	0.307918	0.235	0.074	1.05688e-06	Smim18	0.00492973	0.0892457	0.081	0.029	1	Usp22	8.79211e-09	0.161326	0.456	0.329	0.00017782	Src	2.27204e-08	0.134081	0.137	0.049	0.00045952	Eif5	0.000293735	0.371949	0.955	0.935	1
Isca2	0.0109856	0.223979	0.509	0.351	1	Rock2	0.000373865	0.496748	0.747	0.6	1	Socs6	0.0017248	0.194882	0.208	0.078	1	Nuak2	6.58783e-11	0.126039	0.102	0.014	1.26025e-06	Cep44	0.00493403	-0.230884	0.172	0.303	1	Cdhr1	9.27937e-09	-0.183251	0.989	0.994	0.000187675	Pla2g2d	2.31448e-08	0.0526666	0.038	0.004	0.000468103	Gm9925	0.000293767	0.118678	0.071	0.014	1
Tnk2	0.0110394	0.139309	0.189	0.086	1	Nxnl2	0.000383329	-0.368572	0.544	0.762	1	Rps24	0.00174294	0.178262	1	1	1	Atp5j	6.66124e-11	-0.351369	0.988	0.994	1.27429e-06	Cfap97	0.0049533	-0.228024	0.394	0.551	1	Trak2	1.01672e-08	-0.202913	0.865	0.895	0.000205632	Gm16551	2.41484e-08	0.153445	0.164	0.065	0.000488402	Dpysl2	0.000295158	0.199377	0.402	0.224	1
Lnx1	0.0110698	0.095548	0.113	0.04	1	Nfasc	0.000387472	-0.303781	0.139	0.341	1	Klf13	0.00178936	0.125145	0.104	0.025	1	C2cd4b	7.34709e-11	0.232402	0.157	0.035	1.4055e-06	Kmt2e	0.00500285	-0.219429	0.949	0.967	1	Rab6b	1.05588e-08	0.196262	0.264	0.171	0.000213552	Tmem132b	2.52518e-08	0.0711592	0.046	0.006	0.000510718	Strap	0.000299551	0.222048	0.598	0.378	1
Usp47	0.011095	0.285345	0.547	0.401	1	Arhgef26	0.000387702	-0.343944	0.177	0.381	1	Bbs5	0.00181991	-0.324711	0.125	0.343	1	2025-03-01	7.66024e-11	-0.451629	0.584	0.808	1.4654e-06	Ddx10	0.00500584	-0.172565	0.081	0.2	1	1190005I06Rik	1.13519e-08	0.22265	0.964	0.935	0.000229592	Uchl1	2.63207e-08	0.236879	0.302	0.166	0.000532335	Plxnc1	0.000301667	0.0994096	0.08	0.018	1
Suclg1	0.0112161	0.200433	0.943	0.827	1	Stat3	0.000388061	0.263657	0.354	0.18	1	Ttyh2	0.00184872	-0.426273	0.375	0.566	1	Wwc1	8.1605e-11	0.346195	0.265	0.092	1.5611e-06	Cox5a	0.00501774	0.163108	0.99	0.991	1	Tspan7	1.1359e-08	-0.179698	0.891	0.922	0.000229736	Tafa1	2.64065e-08	0.0642822	0.046	0.006	0.000534071	Ptma	0.000303548	0.286344	1	0.998	1
Max	0.0112951	0.211586	0.566	0.401	1	Wscd1	0.000390687	0.371597	0.354	0.189	1	Brd1	0.0018536	0.34787	0.688	0.506	1	Rcn1	8.16516e-11	0.232702	0.151	0.032	1.56199e-06	Bche	0.00503448	0.0714995	0.04	0.009	1	Pcp4	1.13959e-08	0.134085	0.258	0.157	0.000230482	Nsg2	2.67593e-08	0.15356	0.156	0.061	0.000541206	Pex5l	0.000306331	-0.444046	0.607	0.694	1
Ncapd3	0.0116471	0.192105	0.377	0.226	1	Sag	0.000411053	-0.356013	0.975	1	1	Gpr162	0.00187595	-0.423341	0.375	0.58	1	Fnbp1l	8.67004e-11	0.222527	0.163	0.038	1.65858e-06	Tmem30a	0.00504665	-0.247413	0.717	0.8	1	Sema5a	1.23454e-08	0.123285	0.13	0.063	0.000249686	Ddias	2.69109e-08	0.0623659	0.042	0.005	0.000544274	1700017B05Rik	0.000306656	0.121216	0.071	0.014	1
Xpot	0.0116721	0.152022	0.226	0.112	1	Fam221a	0.000411413	0.203773	0.177	0.061	1	Skap2	0.0018848	0.0991958	0.062	0.01	1	Dbndd2	9.17774e-11	0.453482	0.494	0.272	1.7557e-06	Insm1	0.00507079	-0.204027	0.98	0.992	1	Eef1a2	1.26259e-08	0.326186	0.855	0.827	0.000255358	Tspyl4	2.73516e-08	0.212452	0.336	0.189	0.000553186	Aldh1l2	0.000306656	0.109534	0.071	0.014	1
Oip5os1	0.0117294	-0.331763	0.698	0.743	1	Saal1	0.000417502	0.24805	0.253	0.11	1	Tmem63b	0.00189186	-0.287302	0.188	0.427	1	Usp11	9.892e-11	0.212373	0.181	0.046	1.89234e-06	Luc7l3	0.0050881	-0.183166	1	0.992	1	Phgdh	1.29755e-08	0.13855	0.085	0.033	0.00026243	Clmn	2.73763e-08	0.0518353	0.042	0.005	0.000553685	Sec63	0.000319118	0.203768	0.634	0.416	1
Zcchc9	0.0117893	-0.289368	0.264	0.426	1	Meig1	0.000418776	-0.301853	0.063	0.236	1	Amt	0.0018997	0.170575	0.125	0.035	1	Ptp4a3	1.0101e-10	-0.394407	0.88	0.991	1.93232e-06	Pdk2	0.0051599	-0.253757	0.202	0.329	1	Mdga1	1.36825e-08	0.107579	0.123	0.059	0.000276729	Asap1	3.06085e-08	0.19383	0.202	0.092	0.000619057	Olfm1	0.000319878	0.350652	0.786	0.679	1
Emc7	0.0117971	-0.506889	0.774	0.86	1	Ubxn4	0.000430389	0.292219	0.886	0.748	1	Dhtkd1	0.00196555	0.0711815	0.062	0.01	1	Mgst3	1.05071e-10	0.549342	0.614	0.395	2.01001e-06	Fgf2	0.005195	0.272703	0.525	0.389	1	Rps11	1.38973e-08	0.146683	1	1	0.000281073	Trim8	3.11768e-08	0.156294	0.187	0.08	0.000630551	Dmac2	0.00032166	-0.353386	0.161	0.321	1
Wdtc1	0.0118065	-0.306378	0.396	0.545	1	Cep97	0.000431271	0.169753	0.203	0.075	1	Gm2449	0.00196555	0.0711815	0.062	0.01	1	Rev3l	1.05869e-10	0.557397	0.614	0.386	2.02527e-06	Riok3	0.00520159	-0.209517	0.818	0.884	1	Cplx4	1.49618e-08	-0.223543	0.851	0.895	0.000302603	Acsl1	3.13822e-08	-0.369315	0.416	0.563	0.000634705	Rbm17	0.000323192	0.302411	0.652	0.455	1
Zfp85	0.0119646	0.0967341	0.075	0.021	1	Cept1	0.000445252	0.149925	0.19	0.068	1	Pkdcc	0.00199681	0.0693837	0.062	0.01	1	Impg1	1.07795e-10	-0.491319	0.145	0.398	2.06212e-06	Zfp14	0.0052626	0.113332	0.101	0.041	1	Ctnnbip1	1.526e-08	0.127471	0.304	0.199	0.000308634	Ptprk	3.15572e-08	0.0705591	0.057	0.01	0.000638244	Zfp260	0.000338865	0.196767	0.509	0.315	1
Tgfbr1	0.0119729	0.246553	0.377	0.24	1	Cntrob	0.000455468	0.192799	0.241	0.1	1	Cyfip2	0.0020145	0.188234	0.167	0.057	1	Foxn3	1.08821e-10	0.28256	0.253	0.086	2.08175e-06	Homer2	0.00530503	0.0543657	0.04	0.009	1	Rpl10	1.5325e-08	0.167178	0.997	0.988	0.000309948	Fam53b	3.46091e-08	-0.302747	0.267	0.437	0.000699969	Xbp1	0.000343275	0.394303	0.42	0.265	1
Trappc2l	0.0119992	0.228846	0.868	0.761	1	Atp1b1	0.000458623	0.251496	0.127	0.035	1	Atp5md	0.00204815	-0.280248	1	1	1	Fam171a2	1.15127e-10	0.133494	0.09	0.01	2.20239e-06	Uck1	0.00542998	0.136419	0.283	0.169	1	Acadvl	1.62151e-08	-0.196639	0.242	0.343	0.000327951	Tmsb4x	3.67695e-08	-0.212726	0.992	0.999	0.000743663	Pdhb	0.000344575	-0.266465	0.821	0.896	1
Tbc1d23	0.0120531	-0.232041	0.094	0.241	1	Pdxp	0.000468523	0.190469	0.329	0.157	1	Ybx1	0.00215681	0.231683	1	0.999	1	Amotl2	1.17055e-10	0.369864	0.319	0.131	2.23927e-06	Ncoa2	0.00550269	-0.264081	0.747	0.796	1	Ifrd1	1.65958e-08	0.145867	0.626	0.489	0.00033565	Marcks	3.82424e-08	0.332087	0.813	0.706	0.000773453	Gm5914	0.000349201	0.28724	0.679	0.486	1
Fcho2	0.0120853	0.308361	0.415	0.28	1	Ndufa3	0.000488558	-0.308718	0.899	0.93	1	Epb41l4b	0.00224873	0.233539	0.104	0.026	1	Rest	1.21091e-10	0.132	0.09	0.01	2.31648e-06	1700123M08Rik	0.00554034	0.0348968	0.04	0.009	1	Rpl22l1	1.74112e-08	0.168311	0.977	0.953	0.000352142	Ksr2	3.85775e-08	0.0769786	0.069	0.015	0.000780231	Sgip1	0.000351017	-0.375999	0.625	0.708	1
Dus4l	0.012147	0.147017	0.132	0.052	1	Cox6a1	0.000492554	-0.282809	1	0.993	1	Fam92b	0.00227985	0.204912	0.104	0.026	1	Sbk1	1.23714e-10	0.311793	0.355	0.154	2.36666e-06	Got2	0.00557259	0.244033	0.616	0.468	1	Slc2a13	1.77758e-08	0.111223	0.076	0.028	0.000359515	Ifngr1	3.95649e-08	0.205208	0.24	0.12	0.000800199	Tmem237	0.000352682	-0.293383	0.839	0.932	1
Eif4ebp2	0.012157	0.186514	0.321	0.184	1	Gtf2f2	0.00049356	-0.313635	0.253	0.453	1	Tmem14a	0.00230286	0.167794	0.188	0.068	1	Pak1	1.30587e-10	0.102746	0.066	0.004	2.49814e-06	Rcan2	0.00558544	0.177941	0.101	0.042	1	Uqcc2	1.81782e-08	0.193985	0.858	0.799	0.000367654	Sema6a	4.06086e-08	0.181471	0.172	0.072	0.000821308	Rims3	0.000357632	0.164209	0.098	0.027	1
P3h4	0.012271	0.117101	0.113	0.041	1	4930447C04Rik	0.000503313	0.125302	0.152	0.047	1	Ddb1	0.00231175	-0.413217	0.417	0.584	1	Tnik	1.39272e-10	0.346839	0.361	0.156	2.66427e-06	Rps20	0.00562262	0.179373	1	1	1	Eprs	1.87698e-08	0.263894	0.896	0.871	0.000379619	Gm49708	4.15915e-08	0.177117	0.103	0.032	0.000841187	Nav2	0.000359142	0.147932	0.241	0.108	1
Npepl1	0.0124055	0.174095	0.132	0.053	1	Spata31d1a	0.000512802	0.0988843	0.051	0.005	1	Hist1h2an	0.00232549	0.0866584	0.083	0.018	1	Rpgrip1	1.4121e-10	-0.449228	0.837	0.973	2.70135e-06	Cpne3	0.00562575	-0.217766	0.192	0.331	1	Mgst3	2.0147e-08	0.174354	0.319	0.214	0.000407472	4430402I18Rik	4.24117e-08	-0.235997	0.084	0.233	0.000857776	Lsm4	0.00036006	-0.286376	0.946	0.966	1
Srgap2	0.0124058	0.173382	0.283	0.154	1	Rtn1	0.000515514	-0.288139	0.101	0.297	1	Usp20	0.00235161	0.228921	0.229	0.096	1	Zdhhc2	1.4717e-10	-0.486682	0.422	0.684	2.81537e-06	Atp8a2	0.00563316	-0.226435	0.687	0.771	1	Olfm1	2.11064e-08	0.261188	0.776	0.715	0.000426877	Cers6	4.26054e-08	0.107652	0.084	0.022	0.000861694	Shisal1	0.000362457	0.333542	0.259	0.133	1
6430531B16Rik	0.0126135	0.0716431	0.075	0.021	1	Crot	0.000519893	0.327128	0.253	0.112	1	Klc3	0.00240434	-0.35685	0.688	0.868	1	Dgkz	1.57102e-10	0.177451	0.157	0.036	3.00535e-06	Psme2	0.00564906	0.17162	0.232	0.133	1	St6galnac5	2.11617e-08	0.117652	0.109	0.049	0.000427995	Rax	4.59744e-08	-0.338627	0.538	0.657	0.000929833	Pwwp2a	0.00036425	0.226276	0.616	0.405	1
Mfsd14a	0.0129453	-0.220435	0.094	0.244	1	Adam22	0.000521357	0.0818108	0.051	0.005	1	Sdf2l1	0.00244992	0.289658	0.208	0.082	1	Chrnb4	1.61984e-10	0.481282	0.476	0.255	3.09874e-06	Mospd2	0.00564992	-0.15055	0.051	0.152	1	Gulp1	2.16068e-08	-0.265332	0.352	0.438	0.000436997	Adcy5	4.81566e-08	0.068081	0.061	0.012	0.000973968	Ptgds	0.000365921	2.36985	0.188	0.082	1
Tubb5	0.0130045	-0.350092	0.66	0.774	1	Abr	0.000521357	0.0818108	0.051	0.005	1	Prnp	0.00245696	0.332168	0.812	0.654	1	St6galnac5	1.63622e-10	0.20387	0.096	0.013	3.13008e-06	Msi2	0.00566531	-0.219827	0.939	0.957	1	Stk40	2.25707e-08	0.252636	0.414	0.318	0.000456492	Tnpo1	4.84325e-08	-0.327969	0.599	0.71	0.000979548	Clic1	0.000384711	0.221943	0.491	0.317	1
Asah1	0.0134596	0.304234	0.415	0.284	1	Gm14286	0.000530018	0.0645328	0.051	0.005	1	Slc25a4	0.00255336	-0.305568	0.958	0.999	1	Gnao1	1.69194e-10	0.392746	0.476	0.251	3.23669e-06	Kif1bp	0.00567161	-0.234234	0.293	0.433	1	Aprt	2.35581e-08	0.146167	0.362	0.247	0.000476462	Acaa1b	4.89175e-08	0.0716115	0.061	0.012	0.000989356	Slc7a3	0.000393071	0.171716	0.089	0.023	1
Zfp560	0.0136954	0.146437	0.321	0.18	1	Nova1	0.000530018	0.0645328	0.051	0.005	1	Atp1a3	0.00265753	-0.307607	0.958	0.98	1	Arhgef26	1.76791e-10	-0.407614	0.139	0.396	3.38202e-06	Adgrl1	0.00574019	0.202189	0.444	0.317	1	Arpc2	2.38714e-08	0.144989	0.934	0.935	0.000482799	Fth1	5.03331e-08	-0.198446	0.996	0.999	0.00101799	Supt6	0.000394711	0.186408	0.643	0.419	1
Rab6a	0.0139367	0.193045	0.642	0.461	1	Cdh20	0.000538991	0.0784596	0.051	0.005	1	Fabp12	0.00266925	0.298873	0.896	0.685	1	Smarca1	1.80562e-10	0.192016	0.114	0.019	3.45416e-06	Tax1bp1	0.00575308	-0.192042	1	1	1	Rack1	2.4335e-08	0.143539	0.997	0.995	0.000492175	Gnai1	5.32494e-08	0.107417	0.122	0.042	0.00107697	Nt5e	0.000395022	-0.335152	0.384	0.561	1
B4galt3	0.0140438	0.143158	0.189	0.089	1	Slc18b1	0.000538991	0.0784596	0.051	0.005	1	Mvd	0.00273167	0.142826	0.125	0.037	1	Olfm2	1.88095e-10	0.384725	0.319	0.133	3.59825e-06	Pmvk	0.00576601	0.24232	0.556	0.418	1	Pdcl3	2.43383e-08	0.129029	0.582	0.442	0.000492243	Dync1h1	5.38258e-08	0.243413	0.691	0.507	0.00108863	Chchd10	0.000401742	-0.317534	0.991	0.996	1
Zfand6	0.0141132	0.244591	0.906	0.828	1	Efna5	0.000538991	0.0784596	0.051	0.005	1	Cpt1a	0.00276886	-0.30234	0.042	0.228	1	Nrip1	1.88422e-10	0.538049	0.795	0.698	3.60452e-06	Pnpla8	0.00579402	-0.286709	0.333	0.45	1	Egln3	2.44947e-08	0.0900982	0.103	0.045	0.000495406	Cox6b2	5.88892e-08	0.0810923	0.065	0.014	0.00119103	Thrb	0.000406071	-0.392474	0.339	0.493	1
Iqce	0.0141374	-0.199728	0.038	0.163	1	Garem1	0.000542061	0.154752	0.101	0.023	1	Vldlr	0.00277424	-0.353716	0.438	0.667	1	Grin2c	1.99059e-10	0.0595888	0.042	0	3.808e-06	Ankrd2	0.00583965	0.104687	0.091	0.035	1	Lrit2	2.45112e-08	-0.224565	0.279	0.374	0.000495739	Pip5k1b	5.91453e-08	0.0970832	0.095	0.028	0.00119621	Cplx3	0.000406157	0.332298	0.982	0.952	1
Ppp2r5a	0.0141412	-0.221323	0.113	0.27	1	Spsb2	0.000542678	0.18585	0.19	0.07	1	Crtac1	0.00280311	0.185789	0.208	0.082	1	Rgs8	1.99079e-10	0.0679041	0.042	0	3.80838e-06	Flywch2	0.00584752	0.153999	0.283	0.171	1	Klhl33	2.57023e-08	-0.269558	0.24	0.339	0.00051983	Arvcf	6.15689e-08	0.112221	0.118	0.04	0.00124523	Dedd2	0.000412261	-0.192247	0.027	0.152	1
Brwd3	0.0142583	0.219628	0.34	0.202	1	Nxph3	0.000547952	0.0611816	0.051	0.005	1	Ilf2	0.00280589	0.29257	0.854	0.662	1	Gm12406	1.99079e-10	0.0679041	0.042	0	3.80838e-06	Klhl33	0.00587136	-0.353546	0.364	0.467	1	Rd3l	2.6422e-08	-0.226792	0.144	0.231	0.000534385	Cdhr1	6.41864e-08	-0.300432	0.733	0.807	0.00129817	Uqcr11	0.000412466	-0.257461	0.991	0.998	1
Gucy1a2	0.0143361	0.0599006	0.057	0.014	1	Zfp365	0.00055783	-0.34891	0.266	0.467	1	App	0.00291117	0.357244	0.208	0.083	1	C2cd2l	2.02911e-10	-0.471134	0.404	0.665	3.88168e-06	Amer2	0.00588019	-0.212971	1	0.994	1	Kdm7a	2.65243e-08	0.17637	0.582	0.453	0.000536454	Amigo2	6.90718e-08	0.114269	0.08	0.021	0.00139698	Aldh18a1	0.00041351	0.267184	0.134	0.048	1
Terf1	0.0143788	0.161639	0.245	0.127	1	Hnrnpf	0.000568626	-0.317374	0.937	0.965	1	Cngb1	0.00292642	-0.354624	0.896	0.957	1	Rtn4rl1	2.15676e-10	0.329159	0.265	0.096	4.12589e-06	Zfp563	0.00590323	-0.146444	0.061	0.166	1	Bola1	2.7591e-08	0.152143	0.579	0.443	0.000558028	Sat2	7.16144e-08	0.0786227	0.069	0.016	0.0014484	Ndufs3	0.000422365	-0.259944	0.821	0.885	1
Abcg1	0.0143824	0.216835	0.623	0.445	1	Lrrc4	0.000568681	0.138633	0.101	0.023	1	Gmppb	0.00302222	0.114602	0.125	0.037	1	Lhx1	2.19372e-10	0.120282	0.06	0.003	4.19658e-06	Gm13889	0.00595801	0.136539	0.101	0.041	1	Bmf	2.77575e-08	0.148334	0.188	0.109	0.000561396	Klhl33	7.21029e-08	-0.310319	0.107	0.254	0.00145828	Calm2	0.000435462	0.288428	1	1	1
Tfg	0.0146995	0.213421	0.566	0.401	1	Zfp704	0.000575405	0.208505	0.291	0.136	1	Ndufb2	0.00302404	-0.26928	0.979	0.989	1	Ripor2	2.25386e-10	0.0961691	0.06	0.003	4.31164e-06	Rab5c	0.0060407	0.216974	0.525	0.378	1	Imp3	2.97959e-08	0.134033	0.589	0.453	0.000602622	Igf2bp1	7.34796e-08	0.0534983	0.034	0.003	0.00148613	Nap1l1	0.000442731	-0.207178	1	1	1
Srm	0.0147201	0.205911	0.245	0.131	1	Hist2h2ac	0.000585274	0.195249	0.177	0.063	1	Atp5f1	0.00302665	-0.251917	1	0.975	1	Kbtbd11	2.25387e-10	0.120282	0.06	0.003	4.31165e-06	Trnp1	0.00612691	0.254523	0.303	0.187	1	Fam53b	3.094e-08	-0.214212	0.655	0.693	0.000625761	Adamtsl2	7.38718e-08	0.0724361	0.057	0.011	0.00149406	Cul3	0.000444974	-0.276238	0.884	0.932	1
Mief1	0.0148936	0.102373	0.132	0.053	1	Pgrmc2	0.000587361	-0.41456	0.354	0.528	1	Uxt	0.00303939	0.229522	0.312	0.154	1	Pgrmc1	2.29404e-10	0.377973	0.458	0.24	4.38849e-06	Ugp2	0.00615004	0.143628	0.313	0.192	1	Tmem243	3.20703e-08	-0.186662	0.792	0.838	0.000648622	1700128E19Rik	7.39428e-08	0.0437225	0.034	0.003	0.00149549	Nfasc	0.000448712	-0.329396	0.205	0.375	1
Fkbp15	0.0151663	0.209596	0.245	0.13	1	Trerf1	0.000596486	0.105843	0.101	0.023	1	Efr3a	0.00304544	-0.373746	0.271	0.475	1	Rgl3	2.31534e-10	0.0798673	0.06	0.003	4.42925e-06	Tcf12	0.00616571	-0.222051	0.859	0.937	1	Lztfl1	3.23552e-08	-0.190362	0.892	0.908	0.000654384	Atp5mpl	7.59472e-08	-0.217271	0.981	0.977	0.00153603	Mgst3	0.000451999	0.183126	0.411	0.235	1
Aip	0.015201	0.203601	0.679	0.465	1	Zbtb12	0.000613981	0.159385	0.177	0.063	1	Xrn1	0.00305388	0.291956	0.5	0.323	1	Cdk6	2.48152e-10	0.266758	0.241	0.08	4.74714e-06	Gm16310	0.00619068	0.0593341	0.051	0.014	1	Pycr1	3.29263e-08	0.126443	0.094	0.04	0.000665934	Gnasas1	7.60948e-08	0.0637076	0.057	0.011	0.00153902	Slc38a1	0.000454719	0.262934	0.58	0.409	1
Cep104	0.0152131	0.173082	0.358	0.216	1	Rcbtb2	0.000617661	0.168338	0.177	0.063	1	Slc25a3	0.00306452	-0.302105	0.917	0.965	1	Maz	2.62534e-10	0.382721	0.59	0.362	5.02228e-06	Tet3	0.00626492	-0.191606	1	0.996	1	Mkrn2os	3.42434e-08	0.181501	0.173	0.1	0.000692573	Six6	7.64461e-08	0.300726	0.424	0.28	0.00154612	Atrip	0.000455621	-0.295038	0.17	0.339	1
Amdhd2	0.0155671	0.0957278	0.132	0.053	1	Cnnm3	0.000633902	0.205025	0.354	0.18	1	Dusp12	0.00312589	0.152651	0.208	0.082	1	Maged2	2.74699e-10	0.262931	0.259	0.092	5.255e-06	Msi1	0.00629139	-0.157302	0.99	0.995	1	Hsp90b1	3.54658e-08	-0.158953	0.997	0.996	0.000717296	Cyth3	8.07275e-08	0.130898	0.134	0.049	0.00163271	Cdc37l1	0.000457042	-0.299578	0.83	0.892	1
Eef1g	0.0156123	-0.307528	0.66	0.746	1	Wwc1	0.000634959	0.163161	0.241	0.1	1	Ptpn23	0.00312945	0.177314	0.208	0.083	1	Zfp30	2.79925e-10	0.282049	0.355	0.15	5.35496e-06	Rnasek	0.00630586	0.148533	0.96	0.929	1	Synrg	3.57833e-08	-0.183627	0.754	0.82	0.000723718	2025-09-06	8.8703e-08	0.101257	0.095	0.028	0.00179402	Elmsan1	0.000461726	0.222506	0.116	0.038	1
Pcdhb18	0.01582	0.0898869	0.075	0.022	1	Smarcc1	0.000644568	0.370687	0.468	0.28	1	Mrps35	0.00325096	0.230639	0.458	0.26	1	Hist2h2ac	2.89515e-10	0.234653	0.199	0.058	5.53843e-06	Dnmt3a	0.00632588	-0.172224	0.939	0.97	1	Mpp6	3.63154e-08	0.237064	0.436	0.325	0.000734479	C430049B03Rik	8.89571e-08	0.0736516	0.038	0.005	0.00179916	Rps7	0.000468512	0.177337	1	1	1
Cers6	0.0158604	0.0436393	0.038	0.007	1	C1ql3	0.000646632	0.420015	0.418	0.248	1	Ahcyl1	0.00332229	-0.39567	0.521	0.72	1	Klf13	2.91689e-10	0.215432	0.145	0.031	5.58002e-06	Fat1	0.00637165	0.11012	0.101	0.042	1	Ahcyl1	3.75535e-08	-0.178262	0.934	0.954	0.00075952	Samd5	8.99435e-08	0.0667718	0.042	0.006	0.00181911	Gabbr1	0.000471183	0.237596	0.482	0.297	1
Gchfr	0.0158604	0.0436393	0.038	0.007	1	Dbnl	0.000649963	0.249109	0.316	0.161	1	Prkca	0.00334787	-0.320431	0.104	0.303	1	Pafah1b3	3.18016e-10	0.405732	0.56	0.323	6.08365e-06	Gm20300	0.00639962	-0.18106	0.071	0.176	1	Glcci1	3.85804e-08	-0.192417	0.855	0.883	0.000780289	Atp2b2	9.12672e-08	0.118535	0.092	0.027	0.00184588	Alkbh5	0.000477969	0.345223	0.607	0.427	1
Grhl3	0.0158604	0.0436393	0.038	0.007	1	Amotl2	0.000655501	0.230786	0.278	0.131	1	B230216N24Rik	0.00336827	0.080204	0.042	0.005	1	Npas3	3.25458e-10	0.081374	0.054	0.002	6.226e-06	Paqr4	0.00647793	-0.268817	0.434	0.542	1	Nbea	4.21939e-08	-0.170213	0.891	0.921	0.000853372	Lrig3	9.31863e-08	0.0473723	0.038	0.005	0.00188469	Pcdh1	0.000487613	0.0552741	0.045	0.005	1
Gal3st4	0.0158604	0.0436393	0.038	0.007	1	Taok3	0.000658253	-0.378231	0.19	0.376	1	Mkrn2os	0.00336827	0.080204	0.042	0.005	1	Cited4	3.33702e-10	0.215768	0.084	0.009	6.38372e-06	Slc12a6	0.00653228	-0.286864	0.626	0.681	1	Sms	4.21967e-08	0.165934	0.886	0.833	0.000853428	Cspp1	9.4534e-08	-0.368661	0.496	0.617	0.00191195	Usp14	0.000492223	0.232176	0.527	0.332	1
4930590J08Rik	0.0158604	0.0436393	0.038	0.007	1	Glt28d2	0.000671779	-0.287937	0.051	0.21	1	Cfap43	0.00336827	0.080204	0.042	0.005	1	Fam110a	3.36648e-10	0.715349	0.512	0.306	6.44008e-06	Synrg	0.00661944	-0.242352	0.778	0.812	1	Syp	4.29642e-08	-0.176598	0.993	0.996	0.000868952	6330403K07Rik	9.53969e-08	0.191244	0.248	0.127	0.0019294	Klf11	0.000504056	0.110123	0.089	0.023	1
Csrnp1	0.0158604	0.0436393	0.038	0.007	1	4833439L19Rik	0.000678663	0.339533	0.684	0.474	1	Aldh3a2	0.00337837	0.194667	0.25	0.11	1	Gm15635	3.39466e-10	0.0746618	0.048	0.001	6.49398e-06	Fam241a	0.0066682	0.0734697	0.101	0.041	1	Nt5dc2	4.39122e-08	0.164876	0.476	0.361	0.000888124	Ube2q1	1.05118e-07	0.203204	0.351	0.205	0.00212602	Rpl7a	0.000507517	0.243131	0.991	0.991	1
Gm30198	0.0158604	0.0436393	0.038	0.007	1	Itgb5	0.000682822	0.153478	0.152	0.049	1	Dtnbos	0.00341415	0.078395	0.042	0.005	1	AC163347.1	3.39466e-10	0.0746618	0.048	0.001	6.49398e-06	Pbx1	0.00671716	-0.196832	0.859	0.932	1	Ric8b	4.42796e-08	-0.212499	0.296	0.392	0.000895554	Mllt11	1.05749e-07	0.195571	0.359	0.212	0.00213877	Mkrn2os	0.00051096	0.234026	0.161	0.065	1
4930500L23Rik	0.015986	0.0408514	0.038	0.007	1	Znrd1	0.000703298	0.378459	0.633	0.488	1	Fam214b	0.00343759	0.144486	0.146	0.048	1	Trib1	3.50909e-10	-0.630291	0.355	0.563	6.71288e-06	Map4k3	0.00679017	-0.243891	0.626	0.667	1	Stmn1	4.51276e-08	0.238224	0.871	0.832	0.000912705	Gapdh	1.06607e-07	-0.21822	0.973	0.977	0.00215614	Cacnb2	0.000511085	-0.347166	0.259	0.419	1
Gm45833	0.015986	0.0394595	0.038	0.007	1	Rpl10a	0.000711152	-0.227079	1	1	1	Nsg1	0.00346034	0.0516348	0.042	0.005	1	Tmem47	3.58282e-10	0.259027	0.211	0.064	6.85394e-06	Commd6	0.00684388	0.188234	0.515	0.378	1	Naaa	4.68135e-08	0.340506	0.32	0.234	0.000946802	Tnik	1.09209e-07	0.162471	0.248	0.126	0.00220876	Btf3	0.000516062	0.210642	0.991	0.989	1
Abi3bp	0.015986	0.0422447	0.038	0.007	1	Prrc2a	0.000714163	0.270828	0.658	0.451	1	Zmynd10	0.00346034	0.0516348	0.042	0.005	1	Ssu72	4.08541e-10	-0.392374	0.928	0.97	7.81538e-06	Rnf32	0.00691828	-0.160733	0.071	0.179	1	Btc	4.74834e-08	0.174417	0.364	0.262	0.000960351	Spock2	1.25981e-07	0.0868974	0.088	0.025	0.00254797	Pcp4	0.000522314	0.15572	0.33	0.179	1
Impg1	0.0159945	-0.255714	0.245	0.412	1	Kras	0.000723142	-0.395391	0.443	0.636	1	Myd88	0.00346034	0.0516348	0.042	0.005	1	Csnk1e	4.09156e-10	0.428599	0.56	0.329	7.82716e-06	Arl6ip1	0.00693573	-0.204682	0.98	0.998	1	Azin1	5.38177e-08	0.138177	0.569	0.425	0.00108846	Kcnb1	1.2698e-07	-0.347416	0.485	0.622	0.00256818	Gldc	0.000522678	-0.299905	0.152	0.306	1
Ddx3x	0.0160305	-0.293776	0.283	0.429	1	Celf4	0.000725061	0.271437	0.456	0.269	1	Smtn	0.00346034	0.0516348	0.042	0.005	1	Gm15706	4.24132e-10	-0.419588	0.06	0.287	8.11365e-06	Dcaf7	0.00695927	0.229321	0.515	0.379	1	Arpc5l	5.38713e-08	0.136667	0.514	0.387	0.00108955	Slc25a33	1.32388e-07	-0.299225	0.458	0.601	0.00267755	Fam49b	0.000530581	0.233873	0.42	0.254	1
Clns1a	0.0160977	-0.204827	0.151	0.306	1	Fbxo45	0.000728011	0.194232	0.266	0.121	1	Gm11491	0.00346034	0.0516348	0.042	0.005	1	Gas6	4.61285e-10	-0.434746	0.193	0.444	8.82438e-06	Gm3854	0.0069751	-0.127379	0.01	0.087	1	Nfic	5.7371e-08	-0.18857	0.975	0.984	0.00116033	Trim35	1.45527e-07	0.298814	0.42	0.273	0.00294329	Ttc32	0.000551392	0.155566	0.098	0.029	1
Zdhhc14	0.0161123	0.0394595	0.038	0.007	1	Hes6	0.00072882	0.473982	0.494	0.334	1	4930594M22Rik	0.00346034	0.0516348	0.042	0.005	1	Ubtd1	4.64761e-10	-0.44386	0.217	0.474	8.89087e-06	Ufsp2	0.00697538	-0.226721	0.687	0.783	1	Trim8	5.74687e-08	0.171342	0.314	0.218	0.00116231	Bcorl1	1.46043e-07	0.070193	0.069	0.016	0.00295372	Rpl34	0.000557703	0.241702	1	1	1
Hdac2	0.0161159	0.270358	0.604	0.464	1	Rasgef1b	0.000734886	0.112445	0.089	0.019	1	Fchsd1	0.00346034	0.0516348	0.042	0.005	1	Tdrd7	4.67838e-10	-0.457162	0.331	0.579	8.94975e-06	Rplp1	0.00703316	0.166674	1	1	1	Lpar6	5.92019e-08	0.128465	0.089	0.038	0.00119736	Cntnap2	1.47403e-07	0.157624	0.187	0.085	0.00298123	6430590A07Rik	0.000558951	-0.355977	0.33	0.489	1
Sesn1	0.0162585	-0.279663	0.226	0.382	1	Gm10605	0.000734886	0.112445	0.089	0.019	1	Aff2	0.00346034	0.0516348	0.042	0.005	1	Spon1	4.70896e-10	0.187439	0.102	0.016	9.00824e-06	Ptbp1	0.00706298	0.216318	0.384	0.264	1	Pkib	6.37547e-08	0.112479	0.045	0.011	0.00128944	Phactr1	1.47553e-07	-0.303524	0.34	0.495	0.00298426	Lsm8	0.000564698	0.193054	0.616	0.407	1
Map11	0.016269	0.118448	0.113	0.043	1	Dnaic1	0.00073571	0.216285	0.215	0.086	1	Ptprd	0.00346927	0.149855	0.104	0.028	1	Bend5	4.95901e-10	0.270976	0.259	0.092	9.48659e-06	Jarid2	0.00719169	-0.183213	0.97	0.995	1	Smarca1	6.53829e-08	0.137838	0.172	0.098	0.00132237	Tmem158	1.47717e-07	0.300521	0.385	0.244	0.00298757	Extl2	0.000565736	-0.339375	0.205	0.367	1
Tbcc	0.0163295	0.20259	0.547	0.383	1	Fam50a	0.000741589	0.238906	0.506	0.304	1	Lrrc75a	0.00349315	0.142826	0.125	0.038	1	Jak1	5.38794e-10	0.343303	0.506	0.274	1.03071e-05	Pex5l	0.00725069	-0.226614	0.889	0.949	1	Nudt18	6.63387e-08	0.170662	0.267	0.177	0.0013417	Amer2	1.48659e-07	-0.336064	0.683	0.754	0.00300662	Bmf	0.000568582	0.210765	0.152	0.059	1
Gm15834	0.0164344	0.0995986	0.094	0.032	1	Cfl1	0.000749155	0.290023	0.911	0.827	1	Pdc	0.00349425	-0.179136	1	0.999	1	Atp5j2	5.46256e-10	-0.309777	1	1	1.04499e-05	Ethe1	0.00741715	0.0966182	0.131	0.061	1	Adrb1	6.93002e-08	0.183023	0.182	0.106	0.0014016	Selenom	1.5172e-07	0.17131	0.172	0.074	0.00306853	Mrps18c	0.000579911	0.251475	0.571	0.384	1
Vax2	0.0165823	0.199224	0.396	0.248	1	Npnt	0.000759227	0.18746	0.177	0.063	1	Klhl42	0.0035074	0.0498258	0.042	0.005	1	Tbx2	5.84574e-10	0.151128	0.108	0.018	1.11829e-05	Gm19605	0.00751634	-0.150697	0.03	0.117	1	1110065P20Rik	6.95739e-08	0.149015	0.52	0.393	0.00140713	Sgk3	1.56037e-07	0.0810923	0.057	0.012	0.00315585	Lzts3	0.000595982	0.0994096	0.08	0.02	1
Sart3	0.0169638	0.138555	0.264	0.141	1	Aff4	0.00076178	0.360502	0.785	0.675	1	mt-Atp8	0.00354537	-0.382869	0.938	0.972	1	Pfn1	5.8604e-10	0.447752	0.855	0.731	1.12109e-05	Asxl2	0.00764115	-0.227324	0.525	0.656	1	Soga3	7.05573e-08	0.141783	0.598	0.473	0.00142702	Dock11	1.58319e-07	0.0689065	0.057	0.012	0.00320201	Gm38405	0.000600361	-0.376542	0.232	0.389	1
Slc12a6	0.0169758	0.294283	0.642	0.483	1	Rab11fip4	0.000762188	0.10914	0.089	0.019	1	Mapk4	0.003555	0.0462146	0.042	0.005	1	E130307A14Rik	6.13193e-10	0.213749	0.193	0.055	1.17304e-05	Tgm4	0.00768506	0.056034	0.061	0.019	1	Tcf12	7.06445e-08	-0.166845	0.853	0.888	0.00142879	Cers5	1.63052e-07	0.1155	0.118	0.042	0.00329773	Kmt5a	0.000600631	0.287479	0.652	0.462	1
Bahcc1	0.0169994	0.101042	0.132	0.054	1	Dlgap3	0.000765645	0.0957667	0.089	0.019	1	Mettl23	0.00355607	0.246513	0.542	0.34	1	Hcn1	6.14208e-10	-0.444801	0.699	0.886	1.17498e-05	Epb41l5	0.00781992	-0.23499	0.818	0.915	1	Cspg5	7.11165e-08	-0.192923	0.926	0.959	0.00143833	Casz1	1.85361e-07	-0.300321	0.714	0.774	0.00374892	Cldn23	0.000608238	0.123758	0.071	0.016	1
0610010K14Rik	0.0170527	0.216179	0.547	0.393	1	Tub	0.000767462	-0.319743	0.241	0.43	1	Tbcc	0.00356793	-0.31251	0.188	0.409	1	Rpl17	6.18884e-10	0.381065	1	0.992	1.18393e-05	Ahdc1	0.00783618	-0.232923	0.303	0.43	1	Rpl5	7.31187e-08	0.142713	1	0.999	0.00147883	Akap11	1.87159e-07	0.216677	0.412	0.263	0.00378528	Xpo6	0.000612805	0.274946	0.304	0.168	1
Rs1	0.0170667	-0.416442	0.679	0.799	1	Slc17a7	0.000823278	-0.383027	0.658	0.846	1	Phkg1	0.00359381	0.0991958	0.062	0.011	1	Svbp	6.43903e-10	0.316247	0.524	0.283	1.23179e-05	Frmd4a	0.00784024	0.159788	0.253	0.148	1	Elovl6	7.47438e-08	0.219274	0.42	0.323	0.00151169	Trim67	1.95857e-07	0.126877	0.126	0.046	0.00396122	Dynlrb1	0.000619531	0.297957	0.929	0.894	1
Pcp2	0.017387	0.262246	0.283	0.163	1	Cnp	0.000834658	0.119079	0.076	0.014	1	Smim12	0.00360786	0.193772	0.292	0.139	1	Eno1	6.47515e-10	-0.464677	0.753	0.858	1.2387e-05	Cpsf6	0.00788765	-0.228829	0.909	0.899	1	E2f6	7.68068e-08	0.207794	0.401	0.304	0.00155342	Mlxip	2.01695e-07	0.105102	0.08	0.022	0.00407929	Lamtor1	0.00062464	0.243327	0.625	0.459	1
Il6st	0.0174511	0.171963	0.17	0.08	1	Ptprn	0.000834662	0.167988	0.076	0.014	1	Tspan14	0.00362942	0.0866584	0.083	0.019	1	Tmeff1	6.68226e-10	0.193716	0.157	0.038	1.27832e-05	Gipc1	0.0079039	0.219445	0.404	0.286	1	Mpped2	7.81352e-08	-0.177735	0.959	0.966	0.00158028	Fat4	2.12669e-07	0.0642822	0.046	0.008	0.00430123	Lpgat1	0.000625336	-0.291655	0.759	0.873	1
Zfp422	0.0175143	0.135711	0.283	0.155	1	Mycbp2	0.00083976	0.411041	0.759	0.633	1	Drg2	0.00366664	0.178318	0.229	0.097	1	Junb	6.7222e-10	0.724187	0.512	0.308	1.28596e-05	Lrp4	0.00794124	-0.23106	0.354	0.481	1	Klhl5	7.89646e-08	0.0853478	0.091	0.039	0.00159706	Abcb4	2.18448e-07	0.089995	0.08	0.022	0.00441812	Epb41l4b	0.000629573	0.219637	0.152	0.061	1
Mtg1	0.0175297	0.1383	0.226	0.116	1	Otx2os1	0.000843893	-0.205521	0.063	0.234	1	Atp2c1	0.00369566	-0.31934	0.188	0.385	1	Ahcyl2	6.8293e-10	0.295071	0.253	0.091	1.30645e-05	Dnajc11	0.0080354	-0.212957	0.152	0.271	1	Cyb5r2	7.93665e-08	0.0494557	0.025	0.002	0.00160519	Plekhb1	2.21914e-07	-0.314938	0.752	0.786	0.00448821	Tubb3	0.000635569	0.326547	0.348	0.195	1
Copa	0.0177369	0.200456	0.509	0.34	1	Glrx	0.000850584	0.280817	0.266	0.126	1	Dclk2	0.00375079	0.0711815	0.062	0.011	1	Jpt1	6.9915e-10	0.531033	0.464	0.267	1.33747e-05	Meis1	0.00808743	-0.196629	0.556	0.695	1	Zfp207	9.49958e-08	-0.160632	0.815	0.839	0.00192129	Nkx1-1	2.22496e-07	0.0309964	0.023	0.001	0.00449998	Pdcl3	0.000637077	0.228037	0.518	0.332	1
Thumpd1	0.0177656	0.203427	0.34	0.211	1	Slc24a1	0.000850959	-0.29153	0.025	0.175	1	Hspa13	0.00377748	0.185939	0.333	0.165	1	Sdk1	7.05018e-10	0.189333	0.163	0.041	1.3487e-05	Clock	0.00809718	-0.210436	0.717	0.791	1	Malsu1	9.55906e-08	0.166054	0.479	0.357	0.00193332	Mapt	2.23857e-07	0.144115	0.172	0.075	0.0045275	Marcksl1	0.000659025	0.274026	0.804	0.729	1
Mphosph10	0.0177857	-0.19891	0.113	0.264	1	Jun	0.000857262	0.505705	0.886	0.745	1	Zfp786	0.00380486	0.0693837	0.062	0.011	1	Mir124a-1hg	7.09395e-10	-0.402616	0.88	0.972	1.35707e-05	Ptdss2	0.00816094	-0.242924	0.303	0.414	1	Edf1	9.56542e-08	0.139547	0.958	0.952	0.00193461	Gipc1	2.25448e-07	0.176065	0.252	0.132	0.0045597	Zdhhc2	0.000664391	-0.399005	0.455	0.582	1
Zfp30	0.0178251	0.136456	0.283	0.155	1	Mark1	0.000858029	0.242833	0.19	0.075	1	Tespa1	0.00380486	0.0693837	0.062	0.011	1	Fam92b	7.8998e-10	0.18025	0.139	0.03	1.51123e-05	Zfp266	0.008205	-0.214249	0.727	0.811	1	Tars	9.60696e-08	0.23769	0.369	0.277	0.00194301	Rhou	2.28412e-07	0.0925981	0.08	0.022	0.00461962	Mpped2	0.000683752	-0.278279	0.911	0.95	1
Cst3	0.0179057	0.273733	1	0.999	1	Hic2	0.000859742	0.151065	0.127	0.037	1	Kdm4a	0.00390306	0.35468	0.333	0.188	1	Cycs	7.97227e-10	-0.430811	0.783	0.881	1.52509e-05	Tecpr1	0.00821012	-0.238637	0.768	0.808	1	Rpsa	9.86824e-08	0.124613	1	1	0.00199585	Ina	2.2974e-07	0.20865	0.24	0.124	0.00464648	Ina	0.000688346	0.177916	0.196	0.086	1
Atp5mpl	0.0179304	-0.190932	1	1	1	Sez6	0.000862383	0.214442	0.43	0.238	1	Sgip1	0.00401673	-0.291005	0.167	0.373	1	Tmem237	8.15022e-10	-0.499316	0.518	0.726	1.55914e-05	Fam98a	0.00825428	-0.17783	0.101	0.211	1	Nuak2	1.03831e-07	0.107997	0.122	0.062	0.00209998	Gprin1	2.31342e-07	0.114116	0.134	0.051	0.0046789	Igfbp4	0.000695144	0.123758	0.054	0.009	1
Mark3	0.01797	0.209805	0.66	0.488	1	Nrde2	0.00086277	0.222051	0.291	0.143	1	Mterf3	0.00405057	0.253657	0.354	0.192	1	Pgf	8.57287e-10	0.250843	0.241	0.083	1.63999e-05	Gm30122	0.00825607	0.0543657	0.04	0.01	1	Dtymk	1.1104e-07	0.132465	0.522	0.39	0.00224579	Tap2	2.32024e-07	0.0392217	0.031	0.003	0.00469269	Sdc4	0.00070149	-0.373031	0.268	0.416	1
Fiz1	0.0179791	0.140645	0.321	0.184	1	Pde1c	0.000863891	0.115758	0.076	0.014	1	Tpr	0.00408376	0.3821	0.938	0.786	1	Susd4	9.34547e-10	0.130124	0.066	0.005	1.78779e-05	Mak	0.00831026	-0.213039	0.939	0.967	1	Hrk	1.11084e-07	0.177805	0.125	0.065	0.00224667	Dapk1	2.33123e-07	0.138753	0.168	0.072	0.00471491	Snrpn	0.000718572	0.170995	0.402	0.229	1
Tmem158	0.0181826	0.148048	0.358	0.212	1	Soga1	0.000864966	0.0751162	0.063	0.009	1	Gpr180	0.00411998	-0.413893	0.625	0.735	1	Cacna2d4	9.675e-10	-0.388699	0.108	0.346	1.85083e-05	Ybx3	0.00837337	0.190428	0.98	0.977	1	Amer2	1.1288e-07	0.168861	0.997	0.995	0.00228299	Mindy1	2.38659e-07	0.154045	0.176	0.078	0.00482687	Gng13	0.000718837	0.112076	0.062	0.013	1
Yif1a	0.018428	0.169749	0.736	0.527	1	Dclk2	0.000864966	0.0751162	0.063	0.009	1	Nde1	0.00428803	0.153382	0.104	0.029	1	B4galt6	9.87332e-10	0.0916583	0.066	0.005	1.88877e-05	Polr3g	0.00839261	0.0854547	0.051	0.015	1	Nktr	1.14113e-07	-0.154161	0.986	0.996	0.00230794	Lingo1	2.44233e-07	0.0950482	0.076	0.02	0.0049396	Snrnp70	0.00073241	-0.267789	1	0.991	1
Mat2a	0.0184282	0.247041	0.868	0.862	1	Emb	0.000864966	0.0751162	0.063	0.009	1	Marcksl1	0.00435172	0.154921	0.292	0.136	1	Ece1	1.02386e-09	0.509026	0.392	0.202	1.95865e-05	Nts	0.00842098	0.0719082	0.051	0.015	1	Cox6a2	1.17568e-07	0.181373	0.043	0.011	0.00237781	Pias3	2.66628e-07	-0.29853	0.34	0.49	0.00539256	Rplp2	0.000739608	0.205513	1	1	1
Zc3h7a	0.0184394	0.20415	0.358	0.223	1	A330076H08Rik	0.000865258	0.105728	0.063	0.009	1	Apbb1	0.00438733	0.339492	0.812	0.695	1	Arhgef9	1.02986e-09	0.210818	0.187	0.053	1.97012e-05	Tox	0.0084636	0.192072	0.424	0.304	1	Xkr4	1.17986e-07	0.14173	0.104	0.049	0.00238627	Tpbgl	2.73943e-07	0.108654	0.095	0.03	0.0055405	Rps29	0.000739728	0.207343	1	1	1
Nhlrc2	0.0185323	0.176277	0.321	0.191	1	Atp8a2	0.000877942	-0.379528	0.367	0.561	1	Gnb1	0.00442083	-0.284551	1	0.995	1	Zfp503	1.09544e-09	0.369432	0.163	0.043	2.09558e-05	Arhgap11a	0.00852187	0.0686106	0.051	0.015	1	Ddx5	1.20578e-07	-0.117525	1	1	0.00243869	Slc43a3	2.77739e-07	0.0218594	0.015	0	0.00561728	Zfand3	0.000758408	0.372365	0.393	0.253	1
Pkd1	0.018632	0.155285	0.283	0.159	1	4930500L23Rik	0.000893961	0.0717804	0.063	0.009	1	Uqcr10	0.00449186	-0.304348	0.917	0.974	1	Ndufb7	1.10879e-09	-0.347181	0.94	0.973	2.12112e-05	Col4a2	0.00854361	0.0393189	0.04	0.01	1	Hist2h2ac	1.24992e-07	0.100733	0.111	0.054	0.00252797	Tacr3	2.77739e-07	0.0218594	0.015	0	0.00561728	Fzd2	0.000764726	0.171336	0.116	0.039	1
Mrps28	0.018634	-0.200564	0.415	0.562	1	Ptpra	0.000912195	0.271082	0.57	0.371	1	Aldh4a1	0.00460327	0.12691	0.104	0.029	1	Ndufs5	1.1709e-09	-0.324927	0.97	0.996	2.23993e-05	Egln3	0.00854361	0.0393189	0.04	0.01	1	Limch1	1.28685e-07	-0.168329	0.771	0.835	0.00260266	Gm47423	2.77739e-07	0.0218594	0.015	0	0.00561728	Slc29a4	0.000776206	0.0663101	0.071	0.016	1
Ivns1abp	0.0186539	0.267128	0.528	0.394	1	Huwe1	0.000951588	0.312001	0.734	0.558	1	Gnb5	0.00462563	-0.332599	0.521	0.72	1	Atp8a2	1.17778e-09	-0.448958	0.307	0.569	2.25309e-05	Apbb2	0.00859558	-0.221637	0.202	0.326	1	Rpl14	1.31144e-07	0.126311	1	0.998	0.00265238	Gm49794	2.77739e-07	0.0218594	0.015	0	0.00561728	Aars	0.000777457	0.508616	0.464	0.341	1
Nedd4	0.0187447	0.197469	1	0.982	1	Pi4k2a	0.000956077	0.176421	0.266	0.121	1	Ndufs7	0.00462765	-0.308785	0.792	0.903	1	Tro	1.20671e-09	0.21218	0.199	0.06	2.30844e-05	Tmem121b	0.00866707	0.0593341	0.051	0.015	1	Snta1	1.34617e-07	-0.185784	0.194	0.283	0.00272262	A830012C17Rik	2.77742e-07	0.0272729	0.015	0	0.00561734	Mvb12b	0.000785309	0.168605	0.196	0.088	1
Sgtb	0.0188133	0.187827	0.434	0.28	1	Btg3	0.000979206	0.216314	0.215	0.091	1	Eif2b2	0.00465446	0.192273	0.5	0.293	1	Scd2	1.23939e-09	0.468464	0.241	0.085	2.37095e-05	Ube2v2	0.0087239	-0.207398	0.576	0.701	1	AF067061	1.37953e-07	0.0505399	0.032	0.005	0.0027901	Elavl3	2.81189e-07	0.186651	0.214	0.105	0.00568704	Txn1	0.000792399	0.196882	0.938	0.889	1
Grik3	0.0189631	0.171963	0.17	0.08	1	Txlng	0.00098461	0.219046	0.316	0.161	1	Fmnl2	0.00466181	0.11849	0.146	0.049	1	Cryab	1.26977e-09	0.522909	0.205	0.066	2.42906e-05	Etfb	0.0087851	0.236054	0.475	0.343	1	Mrpl52	1.43207e-07	0.16586	0.858	0.818	0.00289636	Btg1	2.92107e-07	-0.307209	0.645	0.741	0.00590787	Rbm25	0.000805505	-0.224716	1	0.989	1
Spred1	0.0189645	0.11428	0.132	0.055	1	Chil1	0.000997852	0.0360693	0.025	0	1	St6galnac6	0.00466387	0.168298	0.146	0.05	1	Rxrg	1.39716e-09	0.289541	0.271	0.103	2.67277e-05	Prdm8	0.00878835	0.208374	0.313	0.205	1	Apc	1.43821e-07	-0.144897	0.826	0.855	0.00290878	Samd14	2.9963e-07	0.138723	0.187	0.086	0.00606001	Sv2b	0.000808844	-0.287001	0.795	0.844	1
Gm49797	0.0190055	0.174547	0.17	0.079	1	Fam129b	0.000997852	0.0360693	0.025	0	1	Dnajc17	0.00468888	0.177392	0.312	0.153	1	Ric8b	1.48326e-09	-0.387988	0.133	0.375	2.83748e-05	Galnt17	0.00879917	0.0466301	0.051	0.015	1	Rapgef5	1.45454e-07	-0.211681	0.288	0.377	0.00294181	Fam83d	3.15383e-07	0.0428902	0.034	0.004	0.00637863	Cadm3	0.000819432	0.283644	0.348	0.21	1
Rnf2	0.0190633	-0.189172	0.151	0.306	1	Tfpi	0.000997852	0.0360693	0.025	0	1	Amer2	0.00471622	0.442947	0.917	0.887	1	Fhl1	1.50213e-09	0.140149	0.102	0.017	2.87357e-05	Otud7b	0.00882769	-0.24222	0.879	0.895	1	Inhbb	1.47267e-07	0.186656	0.357	0.256	0.00297848	Mtus2	3.27183e-07	0.0992025	0.111	0.038	0.00661728	Me1	0.000819981	-0.270045	0.134	0.281	1
Cyld	0.019093	0.223414	0.321	0.197	1	Lpcat4	0.000997852	0.0360693	0.025	0	1	R3hdm2	0.00480316	0.287174	0.896	0.798	1	Rnf187	1.61268e-09	0.422333	0.524	0.311	3.08505e-05	Epha5	0.00883576	-0.114839	0.889	0.94	1	Tob2	1.49622e-07	-0.172076	0.947	0.963	0.0030261	Traf3	3.532e-07	0.133334	0.156	0.066	0.00714346	Lrit1	0.000825586	-0.399276	0.366	0.514	1
Xndc1	0.0191118	0.101042	0.132	0.055	1	B3galnt1	0.000997852	0.0360693	0.025	0	1	Ctnnb1	0.00481278	0.307129	0.667	0.477	1	St3gal2	1.65603e-09	0.191173	0.217	0.069	3.16799e-05	Ybey	0.00884006	0.115477	0.121	0.056	1	Pmvk	1.51733e-07	0.156977	0.675	0.551	0.0030688	Ptpre	3.61678e-07	0.0318311	0.019	0.001	0.00731494	Eef1d	0.000826304	0.150408	0.455	0.274	1
Ctps	0.0191744	0.130752	0.17	0.079	1	Fhdc1	0.000997852	0.0360693	0.025	0	1	Idh3a	0.00484613	-0.328328	0.312	0.525	1	Icmt	1.86987e-09	-0.392921	0.211	0.463	3.57706e-05	Stx3	0.00887028	-0.165143	1	0.998	1	Slc3a2	1.56376e-07	0.343459	0.895	0.879	0.00316271	Ppnr	3.62833e-07	0.0264378	0.019	0.001	0.00733829	Idh3g	0.000834852	0.223864	0.562	0.371	1
Srcap	0.0191951	0.147502	0.491	0.326	1	Gm12406	0.000997852	0.0360693	0.025	0	1	Ptpn21	0.00495478	-0.351091	0.146	0.329	1	Rax	2.03624e-09	0.447369	0.898	0.825	3.89533e-05	Cngb1	0.00891998	-0.189683	0.97	0.979	1	Rab21	1.58213e-07	0.121145	0.505	0.372	0.00319985	F730043M19Rik	3.81852e-07	0.0653602	0.05	0.009	0.00772296	Hspa9	0.000837281	0.353919	0.75	0.611	1
Cep350	0.0192882	-0.184952	0.189	0.372	1	Adamtsl1	0.000997852	0.0360693	0.025	0	1	Map9	0.00496236	-0.29131	0.229	0.467	1	Inppl1	2.0817e-09	0.216674	0.175	0.049	3.9823e-05	Tom1l2	0.00899008	-0.170903	0.172	0.302	1	Gadd45g	1.62428e-07	0.192329	0.236	0.153	0.00328512	Rdh12	3.84963e-07	-0.326916	0.382	0.522	0.00778587	Camk2n2	0.000844417	0.264025	0.107	0.036	1
Gm41760	0.0193844	0.081284	0.057	0.015	1	Pla2g2c	0.000997852	0.0360693	0.025	0	1	Gpi1	0.00496777	-0.387326	0.521	0.694	1	Smim20	2.1579e-09	0.157535	0.12	0.024	4.12807e-05	Chodl	0.00908844	0.149325	0.081	0.031	1	Mea1	1.65481e-07	0.163582	0.343	0.246	0.00334685	Cplx4	4.10461e-07	-0.265295	0.164	0.309	0.00830157	Prelid1	0.000847028	0.182735	0.571	0.373	1
Gclm	0.0196542	0.199949	0.509	0.362	1	Gm13119	0.000997852	0.0360693	0.025	0	1	Setdb2	0.00498474	0.337788	0.583	0.404	1	Cpeb4	2.17479e-09	0.36243	0.452	0.24	4.16038e-05	Gm12404	0.00911562	0.0482039	0.03	0.006	1	Sra1	1.75559e-07	0.119494	0.493	0.359	0.00355069	Sema4g	4.257e-07	0.079018	0.076	0.021	0.00860978	Fam204a	0.000850164	-0.338197	0.848	0.889	1
Mbd3	0.0196579	0.204425	0.66	0.489	1	Wscd2	0.000997852	0.0712587	0.025	0	1	Rictor	0.00508055	-0.329773	0.125	0.314	1	Cep83	2.25022e-09	0.216329	0.211	0.068	4.30467e-05	Txn1	0.00917333	-0.230728	0.758	0.772	1	Ttc14	1.81758e-07	-0.174588	0.94	0.972	0.00367606	D930028M14Rik	4.37529e-07	0.114486	0.095	0.031	0.00884903	Impg1	0.000855515	-0.251776	0.223	0.4	1
Asb6	0.0197281	0.0970544	0.132	0.055	1	Fzd10os	0.000997852	0.0360693	0.025	0	1	Ccdc136	0.00508126	0.878702	0.396	0.237	1	Harbi1	2.5916e-09	0.156302	0.133	0.029	4.95773e-05	Bpnt1	0.00917963	0.178272	0.263	0.162	1	Bmyc	1.85406e-07	0.127595	0.547	0.416	0.00374984	B4galt4	4.41698e-07	0.0780015	0.073	0.019	0.00893334	Bnip3l	0.000857007	0.230623	0.955	0.909	1
Cltb	0.0197784	0.235658	0.698	0.558	1	Galnt17	0.000997852	0.0360693	0.025	0	1	Foxo6	0.0050941	0.0964154	0.104	0.029	1	Rtn4	2.68018e-09	-0.365971	0.922	0.963	5.12719e-05	Arhgef12	0.00922393	-0.263491	0.404	0.514	1	Zfp36l1	1.87594e-07	0.100548	0.186	0.109	0.00379408	Zbtb20	4.47396e-07	0.420684	0.71	0.577	0.00904858	Bri3	0.000858267	0.217369	0.955	0.876	1
Nfkb1	0.0199713	0.0585154	0.057	0.015	1	Hspb1	0.000997852	0.0360693	0.025	0	1	Mif	0.00511488	-0.451624	0.812	0.881	1	Ndufa11	2.72417e-09	-0.376451	0.892	0.943	5.21134e-05	Rgmb	0.00926927	-0.171294	0.071	0.172	1	A430106G13Rik	1.9361e-07	-0.222878	0.194	0.278	0.00391577	Pde1b	4.49277e-07	0.101257	0.095	0.031	0.00908662	Hspe1	0.000865202	0.276174	0.946	0.916	1
Pcx	0.0199713	0.0585154	0.057	0.015	1	4933425D22Rik	0.000997852	0.0360693	0.025	0	1	Rap2b	0.00511602	0.112357	0.083	0.02	1	Epha8	2.93365e-09	0.27852	0.187	0.057	5.61208e-05	Fbxl12os	0.00930787	0.0941667	0.111	0.05	1	Lrp4	1.96838e-07	-0.186223	0.183	0.272	0.00398105	Clip1	4.56286e-07	0.163624	0.218	0.109	0.00922838	Zc3h3	0.000871427	-0.197493	0.027	0.138	1
Oxsr1	0.02015	0.116273	0.226	0.116	1	Il12rb2	0.000997852	0.0360693	0.025	0	1	Fam110a	0.00512404	0.297858	0.479	0.308	1	Tmem158	3.01476e-09	0.83307	0.434	0.246	5.76724e-05	Syt16	0.00936697	0.0330151	0.03	0.006	1	Spry2	2.02107e-07	-0.224111	0.337	0.425	0.00408762	Lztfl1	4.57422e-07	-0.319306	0.363	0.501	0.00925136	Kcnv2	0.000887016	-0.27178	0.125	0.278	1
Fh1	0.0202035	0.214131	0.491	0.342	1	Ret	0.000997852	0.0360693	0.025	0	1	Bend7	0.00520183	0.21614	0.229	0.101	1	Wdr17	3.11448e-09	-0.470235	0.157	0.386	5.95799e-05	Cby1	0.00944075	0.143729	0.434	0.298	1	Jarid2	2.08678e-07	-0.157644	0.992	0.992	0.00422052	Bahcc1	4.80361e-07	0.102519	0.115	0.041	0.00971529	Psmd14	0.000898969	0.199038	0.5	0.317	1
Nsa2	0.0202698	0.220131	0.83	0.722	1	Gm30524	0.000997852	0.0360693	0.025	0	1	Cspg5	0.0052269	0.406254	0.875	0.784	1	Gnas	3.15645e-09	0.354683	0.958	0.964	6.03829e-05	2025-09-04	0.00947561	-0.232095	0.465	0.573	1	Ptma	2.13173e-07	0.124056	1	1	0.00431143	Gabbr2	5.00739e-07	0.138834	0.13	0.051	0.0101274	Nckap5	0.000902989	0.206889	0.125	0.045	1
Gm9918	0.0202726	0.183407	0.377	0.237	1	Lrmp	0.000997852	0.0360693	0.025	0	1	Ssna1	0.00536595	0.296621	0.604	0.402	1	Cfl1	3.39078e-09	0.401714	0.898	0.832	6.48656e-05	Myo5b	0.00948518	0.0929095	0.101	0.044	1	Uchl3	2.15013e-07	0.100185	0.479	0.348	0.00434864	B3gat1	5.04147e-07	0.123734	0.126	0.048	0.0101964	4931406P16Rik	0.000905947	-0.398076	0.42	0.534	1
Mettl18	0.0202753	0.0789986	0.094	0.033	1	Zfp526	0.000997852	0.0360693	0.025	0	1	Ptcra	0.00539975	0.0806481	0.083	0.02	1	Spsb2	3.40174e-09	0.285152	0.265	0.105	6.50752e-05	Gm14827	0.00948765	0.0788671	0.061	0.02	1	Lrrc4	2.29575e-07	0.108921	0.131	0.069	0.00464315	Zfp428	5.17325e-07	0.236734	0.385	0.248	0.0104629	Azin1	0.000911601	0.238054	0.527	0.341	1
Hsp90b1	0.0203504	-0.252852	0.906	0.94	1	Cavin3	0.000997852	0.0360693	0.025	0	1	Agbl5	0.00540831	0.129056	0.167	0.062	1	Plekhg1	3.41487e-09	0.117727	0.078	0.009	6.53264e-05	Dyrk2	0.00952493	-0.186099	0.939	0.988	1	Ywhag	2.3143e-07	0.15549	0.487	0.372	0.00468067	Znhit1	5.20363e-07	0.191935	0.313	0.183	0.0105243	Lypla1	0.00094004	-0.308642	0.286	0.461	1
Ackr1	0.0203905	0.0675309	0.075	0.023	1	Prr36	0.000997852	0.0360693	0.025	0	1	Paf1	0.00549054	-0.267031	0.042	0.204	1	Pik3ap1	3.56572e-09	0.0880412	0.054	0.003	6.82123e-05	Mospd3	0.009574	0.118276	0.263	0.159	1	Chst2	2.36621e-07	0.0707386	0.057	0.019	0.00478567	Ajap1	5.35804e-07	0.0730415	0.046	0.008	0.0108366	Atf7ip	0.000940971	-0.258367	0.741	0.83	1
Pdgfa	0.0204664	0.0789986	0.094	0.033	1	Vegfc	0.000997852	0.0360693	0.025	0	1	Tmem86a	0.0055277	0.335143	0.646	0.429	1	Eml6	3.59893e-09	0.120534	0.114	0.022	6.88475e-05	Clk1	0.0096808	-0.200876	0.919	0.954	1	Epb41l5	2.44738e-07	-0.168063	0.789	0.847	0.00494984	Sel1l3	5.47216e-07	0.059316	0.053	0.011	0.0110674	Sap18	0.000950622	0.269043	0.607	0.439	1
Trpc3	0.0205703	0.0675309	0.075	0.023	1	Wfdc1	0.000997852	0.0360693	0.025	0	1	Itga3	0.005575	0.0813184	0.083	0.02	1	Uhrf1bp1l	3.67489e-09	0.140475	0.108	0.02	7.03007e-05	Nxnl1	0.0096961	-0.231745	0.626	0.729	1	Rps18	2.50399e-07	0.121929	0.998	0.994	0.00506432	Dpysl2	5.60533e-07	0.174607	0.324	0.189	0.0113368	Kcnd3	0.000954637	0.227446	0.098	0.03	1
Kif2a	0.0205784	0.197482	0.792	0.608	1	Zmynd10	0.000997852	0.0360693	0.025	0	1	Asnsd1	0.0056857	0.197676	0.458	0.26	1	Grk1	3.68653e-09	-0.380629	0.139	0.38	7.05234e-05	Ush2a	0.00975351	-0.225975	0.273	0.401	1	Lonrf1	2.57951e-07	0.147728	0.2	0.124	0.00521705	Nadk2	6.00925e-07	-0.301865	0.298	0.441	0.0121537	Fam92b	0.000961569	0.133024	0.098	0.03	1
AW554918	0.0205887	0.111393	0.208	0.103	1	BC048559	0.000997852	0.0360693	0.025	0	1	Ndufa8	0.00571594	-0.311614	0.771	0.883	1	Tle3	3.77921e-09	0.100291	0.078	0.009	7.22963e-05	Pcx	0.00976931	0.0802878	0.071	0.026	1	Eef1b2	2.62609e-07	0.142004	0.952	0.938	0.00531127	Dtx1	6.01945e-07	0.102519	0.111	0.039	0.0121743	Lman1	0.000969777	-0.232622	0.991	0.993	1
Gm19938	0.0206343	0.0529878	0.057	0.015	1	Gm12127	0.000997852	0.0360693	0.025	0	1	Eif2b4	0.00589268	0.242829	0.479	0.293	1	Gdi1	3.83594e-09	0.317355	0.512	0.291	7.33816e-05	Rpl27a	0.00978918	0.104862	1	1	1	Rbbp7	2.64409e-07	0.10704	0.531	0.403	0.00534767	Rnf150	6.09254e-07	-0.259396	0.134	0.273	0.0123222	Abcb4	0.000979447	0.094374	0.036	0.004	1
Scly	0.020659	0.0776433	0.094	0.033	1	Tmem132e	0.000997852	0.0712587	0.025	0	1	Ccnt1	0.00591481	0.260433	0.438	0.264	1	Gm37679	3.92463e-09	0.0512253	0.036	0	7.50782e-05	Ints4	0.00984451	-0.179979	0.091	0.195	1	Gadd45a	2.64753e-07	-0.211086	0.282	0.374	0.00535463	Camkk2	6.09751e-07	0.142642	0.16	0.07	0.0123322	Tafa5	0.000986399	0.243237	0.205	0.099	1
Abca4	0.0209598	-0.365363	0.472	0.541	1	Kcnh6	0.000997852	0.0360693	0.025	0	1	H2afz	0.00598873	0.269178	0.958	0.919	1	Tspear	3.92463e-09	0.0512253	0.036	0	7.50782e-05	Suv39h2	0.00988261	-0.203084	0.283	0.409	1	Tmem9	2.67127e-07	-0.177978	0.877	0.899	0.00540264	Sgpl1	6.32866e-07	0.0864233	0.099	0.033	0.0127997	App	0.000991115	0.244406	0.607	0.475	1
Acd	0.0210525	0.165269	0.358	0.222	1	Rab40b	0.000997852	0.0360693	0.025	0	1	Fam192a	0.00622506	-0.280857	0.146	0.335	1	Gm49542	3.92463e-09	0.0512253	0.036	0	7.50782e-05	Lin52	0.00989648	0.114508	0.212	0.12	1	Tpi1	2.69867e-07	0.190177	0.896	0.849	0.00545806	Dnmt1	6.68141e-07	0.178779	0.221	0.113	0.0135131	Nrn1l	0.000993607	0.332835	0.179	0.081	1
Vps45	0.0211182	0.160823	0.302	0.176	1	Gm4787	0.000997852	0.0360693	0.025	0	1	Oga	0.00625473	0.283906	0.438	0.266	1	Tcerg1l	3.92491e-09	0.0595888	0.036	0	7.50835e-05	Cstb	0.00993285	0.155383	0.455	0.318	1	Nfasc	2.75049e-07	-0.220972	0.298	0.383	0.00556286	Fam163a	7.0124e-07	0.0347017	0.027	0.002	0.0141826	Saa1	0.00100245	0.0454644	0.036	0.004	1
Adss	0.0211886	0.0932952	0.151	0.066	1	4933433G19Rik	0.000997852	0.0360693	0.025	0	1	Snhg9	0.00628659	0.192065	0.312	0.16	1	Ak8	3.92508e-09	0.0679041	0.036	0	7.50868e-05	Ralgps2	0.0100277	-0.21435	0.737	0.817	1	Scg3	2.76909e-07	0.154578	0.507	0.388	0.00560048	Hspg2	7.0124e-07	0.0347017	0.027	0.002	0.0141826	Smarcb1	0.00100348	0.225619	0.723	0.586	1
Pts	0.0212464	0.247822	0.642	0.519	1	Tcstv3	0.000997852	0.0360693	0.025	0	1	H3f3a	0.00630148	-0.214041	1	1	1	Ndufb5	3.96266e-09	-0.336216	0.946	0.962	7.58057e-05	Tspan5	0.010054	0.209964	0.414	0.296	1	Sf1	2.78224e-07	0.15347	0.59	0.459	0.00562709	Soga3	7.01854e-07	0.21129	0.279	0.159	0.014195	Auts2	0.00100616	0.363089	0.723	0.622	1
Dtnb	0.0212541	0.129095	0.189	0.093	1	Galnt15	0.000997852	0.0360693	0.025	0	1	Stxbp4	0.00630441	-0.259756	0.042	0.201	1	Ndufa12	4.28171e-09	-0.352626	0.916	0.957	8.19091e-05	Sox6	0.0101253	0.149325	0.081	0.032	1	Itga4	2.79732e-07	-0.217585	0.281	0.369	0.00565758	Grk1	7.18486e-07	-0.25402	0.298	0.454	0.0145314	Aldoa	0.0010192	-0.199397	1	1	1
Tpd52	0.0213482	-0.211629	0.792	0.928	1	A930038B10Rik	0.000997852	0.0360693	0.025	0	1	Slc25a10	0.0064442	0.167988	0.25	0.116	1	Actb	4.3419e-09	0.391337	0.988	0.982	8.30606e-05	4632427E13Rik	0.0101489	-0.191125	0.838	0.913	1	Cplx2	2.8164e-07	0.164005	0.984	0.964	0.00569617	Ptp4a3	7.70249e-07	-0.254717	0.813	0.851	0.0155783	Galnt12	0.00102613	0.0428904	0.036	0.004	1
Trip4	0.0214603	0.149188	0.377	0.229	1	Ptk2b	0.000997852	0.0360693	0.025	0	1	Tagln2	0.00649127	0.0920182	0.062	0.013	1	Plxnc1	4.35471e-09	0.144613	0.09	0.014	8.33057e-05	Exosc4	0.0102099	0.217605	0.515	0.387	1	Cpsf6	2.87113e-07	-0.1722	0.889	0.929	0.00580685	Abr	7.70466e-07	0.103534	0.126	0.049	0.0155827	Zbtb20	0.00102928	-0.301786	0.884	0.952	1
Eif5	0.0216632	0.233042	0.849	0.723	1	Gm49097	0.000997852	0.0360693	0.025	0	1	Gdap1l1	0.00649756	0.265528	0.458	0.281	1	Ddhd2	4.38431e-09	0.317762	0.247	0.094	8.38719e-05	Nin	0.0102623	0.353012	0.636	0.537	1	Ccdc141	2.88878e-07	0.193214	0.221	0.142	0.00584256	Atp6v0b	7.71228e-07	-0.255572	0.87	0.892	0.0155981	Anapc5	0.00103167	0.196392	0.438	0.263	1
Git2	0.0216872	0.134876	0.321	0.187	1	Lrrc6	0.000997852	0.0360693	0.025	0	1	Ncs1	0.00657495	0.0693837	0.062	0.013	1	Samd7	4.39813e-09	-0.502657	0.536	0.766	8.41362e-05	Chd1l	0.0103167	-0.117184	0.01	0.081	1	Rps3a1	2.90545e-07	0.124257	1	1	0.00587627	Ctnna2	8.25678e-07	0.108031	0.099	0.034	0.0166993	Pnisr	0.00103323	-0.243655	0.982	0.982	1
Rps4x	0.0219767	0.178268	1	0.998	1	Grm4	0.000997852	0.0360693	0.025	0	1	Trim59	0.00657495	0.0693837	0.062	0.013	1	Cdk5r2	4.46266e-09	-0.414909	0.133	0.368	8.53707e-05	Zfhx3	0.0103852	0.117328	0.212	0.118	1	Crebzf	2.91017e-07	-0.173971	0.834	0.859	0.00588583	Eif4e3	8.37297e-07	0.0705591	0.05	0.01	0.0169343	Cntn1	0.00103373	0.326709	0.304	0.179	1
Klhl36	0.0221542	0.11307	0.113	0.045	1	Pcdhb12	0.000997852	0.0360693	0.025	0	1	Gnptab	0.00658153	0.0964154	0.104	0.03	1	Hmgb1	4.48941e-09	0.290044	0.994	0.996	8.58823e-05	Rhot1	0.0104041	-0.207158	0.747	0.81	1	Rpl29	3.37862e-07	0.112634	0.92	0.897	0.00683325	Exoc7	8.39403e-07	0.245573	0.244	0.134	0.0169769	Atp5md	0.00103615	-0.204573	1	0.998	1
Snx11	0.0221621	0.125898	0.151	0.068	1	Cfap53	0.000997852	0.0360693	0.025	0	1	Rad54l2	0.00660231	-0.224772	0.021	0.169	1	Smpdl3a	4.81401e-09	0.130886	0.096	0.016	9.20921e-05	2310034G01Rik	0.0104705	0.0494564	0.061	0.02	1	Ncam1	3.39901e-07	-0.1395	0.999	0.999	0.0068745	Fkbp14	8.58564e-07	0.0601425	0.05	0.01	0.0173645	H1fx	0.00103745	0.277434	0.491	0.339	1
Rbmx	0.0221838	-0.236591	0.113	0.245	1	Plcb3	0.000997852	0.0360693	0.025	0	1	Ppargc1b	0.00661025	-0.288145	0.062	0.232	1	Ank2	4.87435e-09	-0.515727	0.446	0.671	9.32463e-05	Atp2b1	0.0105234	0.201449	0.99	0.995	1	Clasp1	3.41877e-07	-0.143996	0.841	0.881	0.00691445	Tro	8.8473e-07	0.119043	0.137	0.056	0.0178937	Ddost	0.00103841	0.242322	0.491	0.319	1
Timmdc1	0.02235	0.144663	0.302	0.175	1	Rbm20	0.000997852	0.0360693	0.025	0	1	Gm38287	0.00666127	0.0675882	0.062	0.013	1	Gng13	4.88201e-09	0.255284	0.066	0.006	9.33929e-05	Clstn3	0.0105393	0.114414	0.101	0.044	1	Atf7ip	3.50534e-07	-0.168152	0.839	0.88	0.00708955	Spag9	8.98089e-07	0.225316	0.599	0.431	0.0181639	Rap1b	0.00104634	0.299108	0.455	0.303	1
Cdh2	0.0223774	0.277869	0.66	0.487	1	Dgkk	0.000997852	0.0360693	0.025	0	1	Ier5l	0.00666127	0.0657949	0.062	0.013	1	B3gnt2	5.70359e-09	0.104251	0.048	0.002	0.00010911	Txndc5	0.0105441	-0.213958	0.141	0.25	1	Rpl31	3.60154e-07	0.130155	0.99	0.987	0.00728411	Hs6st1	9.33716e-07	0.121683	0.168	0.076	0.0188844	Gucy2e	0.00104699	-0.341277	0.286	0.437	1
Olfr1238	0.0223859	0.127254	0.019	0.002	1	Dcaf12l1	0.000997852	0.0360693	0.025	0	1	Pgrmc2	0.00672765	-0.317424	0.354	0.564	1	Ube2q2	5.72704e-09	0.303651	0.313	0.137	0.000109558	Sipa1l1	0.0105691	0.128898	0.121	0.057	1	Atp6v1g1	3.65159e-07	0.133707	0.994	0.995	0.00738535	Hivep1	9.44059e-07	0.145499	0.191	0.092	0.0190936	Dusp8	0.0010549	0.450338	0.92	0.844	1
Gm9767	0.0223859	0.0506325	0.019	0.002	1	Plxna3	0.000997852	0.0360693	0.025	0	1	Rps6ka6	0.00674853	0.0657949	0.062	0.013	1	Trp53i11	5.73087e-09	0.0961691	0.048	0.002	0.000109632	Megf10	0.0105747	0.0625283	0.071	0.026	1	Fat1	3.66654e-07	0.0770821	0.078	0.033	0.00741558	Gm38405	9.44839e-07	-0.244667	0.073	0.196	0.0191094	Fuz	0.00105524	-0.212102	0.045	0.163	1
Gm48336	0.0223859	0.127254	0.019	0.002	1	Map3k15	0.000997852	0.0360693	0.025	0	1	Gm12802	0.00679607	0.247272	0.521	0.319	1	Nkd2	5.81307e-09	0.0716468	0.048	0.002	0.000111204	Rapgef5	0.0106327	-0.259528	0.404	0.535	1	Ctxn3	3.70966e-07	0.0496747	0.032	0.006	0.00750278	Nrcam	9.52785e-07	0.133371	0.176	0.081	0.0192701	Hivep2	0.00105641	0.139787	0.17	0.072	1
Faim2	0.0223859	0.20001	0.019	0.002	1	Sfmbt2	0.000997875	0.0537713	0.025	0	1	Cngb3	0.00683673	0.0640039	0.062	0.013	1	Smim13	5.82445e-09	0.469713	0.759	0.635	0.000111422	Sema5b	0.0106851	0.103612	0.081	0.032	1	Ing1	3.73111e-07	0.140959	0.462	0.347	0.00754616	Grik4	9.59691e-07	0.0562794	0.038	0.006	0.0194097	Shisa4	0.00105835	-0.309484	0.25	0.4	1
Vpreb1	0.0223859	0.0506325	0.019	0.002	1	4631405J19Rik	0.000997875	0.0537713	0.025	0	1	Map3k20	0.00689791	0.0570755	0.021	0.001	1	Mxra7	6.1945e-09	0.472677	0.536	0.337	0.000118501	Tlnrd1	0.0107172	0.102403	0.182	0.099	1	Spata1	3.74098e-07	-0.18726	0.199	0.286	0.00756613	B3gat2	9.9867e-07	0.188244	0.179	0.086	0.0201981	Maml2	0.00106733	0.125542	0.098	0.03	1
Tsc22d4	0.0225009	0.187642	0.264	0.15	1	Snx7	0.000997875	0.0537713	0.025	0	1	Ptgis	0.00689791	0.0570755	0.021	0.001	1	Rpl22l1	6.29005e-09	0.40485	0.873	0.742	0.000120329	Pnrc1	0.0107462	-0.148761	0.687	0.771	1	Glmn	3.8395e-07	-0.182491	0.674	0.719	0.00776539	Lgr5	1.00665e-06	0.121216	0.115	0.043	0.0203594	Vax2os	0.0010734	-0.482152	0.5	0.597	1
Egf	0.022532	0.0492311	0.019	0.002	1	Pde3b	0.000997875	0.0712587	0.025	0	1	Thnsl2	0.00689791	0.0570755	0.021	0.001	1	Vegfb	6.31936e-09	0.349231	0.452	0.244	0.000120889	Sergef	0.0107976	0.0846787	0.121	0.057	1	Msi1	4.02269e-07	-0.188417	0.982	0.982	0.00813589	Gm20208	1.02897e-06	0.047686	0.038	0.006	0.0208109	Mkln1	0.00107358	-0.259984	0.866	0.95	1
Eif4ebp1	0.02254	0.0877936	0.132	0.056	1	Rpp25	0.000997875	0.0537713	0.025	0	1	Gm3898	0.00689791	0.0570755	0.021	0.001	1	Fbln5	6.33266e-09	0.0746618	0.042	0.001	0.000121144	Ccdc174	0.0108331	-0.301271	0.414	0.503	1	Agpat5	4.07175e-07	0.208514	0.87	0.829	0.00823511	Otop3	1.04134e-06	0.128835	0.191	0.091	0.0210611	Slc25a33	0.00107641	-0.2408	0.929	0.937	1
Cops8	0.0226369	-0.262859	0.208	0.345	1	Ctsh	0.000997875	0.10561	0.025	0	1	Gm26797	0.00689791	0.0570755	0.021	0.001	1	Slc8b1	6.33268e-09	0.0828823	0.042	0.001	0.000121144	Zc3hc1	0.0109064	0.141266	0.222	0.13	1	Cth	4.21245e-07	0.269434	0.137	0.078	0.00851968	4930447C04Rik	1.05853e-06	0.153832	0.229	0.119	0.0214088	Nfic	0.00107922	-0.24025	0.911	0.961	1
D030040B21Rik	0.0226787	0.0241602	0.019	0.002	1	Pcdhga8	0.000997875	0.0712587	0.025	0	1	Arhgap18	0.00689791	0.0570755	0.021	0.001	1	Cryzl2	6.36598e-09	0.0663942	0.042	0.001	0.000121781	Slc17a7	0.0109815	-0.173711	1	0.995	1	Snrpn	4.2953e-07	0.13336	0.43	0.318	0.00868725	Pdzd2	1.08688e-06	-0.261337	0.195	0.34	0.0219822	Cebpz	0.00108578	0.242128	0.562	0.38	1
Slc45a3	0.0226787	0.0241602	0.019	0.002	1	Fam181b	0.00100529	0.102243	0.038	0.002	1	Hist1h4j	0.00689791	0.0570755	0.021	0.001	1	Il17rd	6.36598e-09	0.0663942	0.042	0.001	0.000121781	Ppef2	0.0109829	-0.211784	0.384	0.513	1	Tceal9	4.44803e-07	0.162661	0.904	0.896	0.00899614	Crtc3	1.19225e-06	-0.238354	0.198	0.353	0.0241132	Itga4	0.00110172	-0.337618	0.196	0.344	1
Tmem81	0.0226787	0.0241602	0.019	0.002	1	Dusp5	0.00100927	0.333636	0.291	0.15	1	Gm47754	0.00689791	0.0570755	0.021	0.001	1	Eya1	6.3993e-09	0.0580789	0.042	0.001	0.000122419	4930581F22Rik	0.0109925	-0.181	0.162	0.282	1	Ncoa2	4.45569e-07	-0.213021	0.635	0.668	0.00901163	Tet3	1.19683e-06	-0.295704	0.557	0.664	0.0242058	Dusp16	0.00110179	0.277507	0.143	0.059	1
Gm37768	0.0226787	0.0241602	0.019	0.002	1	Serinc1	0.00101138	0.304792	0.633	0.477	1	Gabrb3	0.00695676	0.426063	0.312	0.175	1	Gm9925	6.3993e-09	0.0580789	0.042	0.001	0.000122419	Srpk2	0.0110979	-0.198846	0.899	0.938	1	Rpl9	4.709e-07	0.11354	1	1	0.00952396	Ptprs	1.22184e-06	0.26922	0.584	0.44	0.0247117	Jdp2	0.00110668	0.117644	0.08	0.022	1
Olfr52	0.0226787	0.0241602	0.019	0.002	1	Ttll11	0.00101504	0.0678918	0.038	0.002	1	Gm29113	0.00697347	0.0279292	0.021	0.001	1	Asap1	6.59357e-09	0.354971	0.44	0.236	0.000126135	Zfand6	0.0112296	-0.201478	0.879	0.917	1	Dhx32	4.75971e-07	0.113642	0.326	0.226	0.00962651	Ptprg	1.26132e-06	0.119152	0.149	0.064	0.0255103	Txnrd1	0.00111008	0.193064	0.223	0.109	1
Large2	0.0226787	0.0241602	0.019	0.002	1	Tspan12	0.00101504	0.0678918	0.038	0.002	1	AA986860	0.00697347	0.0279292	0.021	0.001	1	Ctnnb1	6.69184e-09	0.377851	0.669	0.472	0.000128015	Fzd4	0.0113568	0.0780581	0.111	0.051	1	Ccdc90b	4.94208e-07	0.12862	0.421	0.308	0.00999536	Gm10605	1.26158e-06	0.0886855	0.092	0.03	0.0255154	Wnk1	0.00112591	-0.262742	0.777	0.871	1
Snai1	0.0226787	0.0241602	0.019	0.002	1	Itga2b	0.00101504	0.0678918	0.038	0.002	1	Dnah14	0.00697347	0.0279292	0.021	0.001	1	Pcgf3	7.09717e-09	0.25947	0.319	0.139	0.000135769	Dchs1	0.0113887	0.0716229	0.081	0.032	1	Iqgap1	4.96606e-07	-0.216418	0.336	0.421	0.0100439	Shisal1	1.30348e-06	0.14997	0.187	0.09	0.0263629	Oxr1	0.00115342	-0.275633	0.125	0.265	1
Gm5148	0.0226787	0.0241602	0.019	0.002	1	Plec	0.00101504	0.0678918	0.038	0.002	1	Gm13267	0.00697347	0.0279292	0.021	0.001	1	Coq8b	7.17424e-09	0.337971	0.596	0.374	0.000137243	Rabac1	0.0115191	0.202618	0.899	0.817	1	Kcnq1ot1	4.97908e-07	-0.152731	0.915	0.964	0.0100702	Fut8	1.30847e-06	0.0780015	0.069	0.019	0.0264638	Ran	0.00115807	0.213042	1	0.959	1
Gpr171	0.0226787	0.0241602	0.019	0.002	1	Rtn4r	0.00101504	0.0678918	0.038	0.002	1	Gm13269	0.00697347	0.0279292	0.021	0.001	1	Rreb1	7.7477e-09	0.427904	0.428	0.235	0.000148214	Ripk4	0.0115387	0.0615384	0.051	0.016	1	Smim20	5.00093e-07	0.122993	0.153	0.088	0.0101144	Glcci1	1.31678e-06	-0.332087	0.45	0.583	0.0266319	Fam181b	0.0011591	0.226164	0.089	0.027	1
Pdgfc	0.0226787	0.0241602	0.019	0.002	1	Phf21b	0.00101999	0.273498	0.278	0.136	1	Dlx1as	0.00697347	0.0279292	0.021	0.001	1	Tmem65	7.87165e-09	0.182232	0.169	0.048	0.000150585	Nfyc	0.0116552	-0.183248	0.141	0.255	1	Zbtb20	5.07334e-07	-0.167547	0.924	0.962	0.0102608	Agtpbp1	1.3478e-06	-0.346682	0.492	0.596	0.0272592	Armc9	0.00116112	-0.318718	0.259	0.414	1
Olfml3	0.0226787	0.0241602	0.019	0.002	1	Rbl1	0.00102485	0.0504044	0.038	0.002	1	Rassf2	0.00697347	0.0279292	0.021	0.001	1	Cdkn1c	9.41002e-09	1.13829	0.367	0.198	0.000180014	Abhd11	0.0116964	-0.185312	0.101	0.202	1	Xpot	5.11116e-07	0.168364	0.264	0.182	0.0103373	Afap1	1.35058e-06	0.114941	0.183	0.086	0.0273154	Zzz3	0.00116179	0.229688	0.554	0.366	1
Col25a1	0.0226787	0.0241602	0.019	0.002	1	Lrrc38	0.00102485	0.0504044	0.038	0.002	1	Matn4	0.00697347	0.0279292	0.021	0.001	1	Cr1l	9.82332e-09	0.13718	0.102	0.019	0.00018792	Mctp1	0.0117265	0.0593341	0.051	0.016	1	Pcmtd2	5.16101e-07	-0.159431	0.942	0.961	0.0104382	Cadps2	1.35709e-06	0.0829254	0.061	0.015	0.0274472	Cplx4	0.0011675	-0.380499	0.589	0.663	1
Runx1t1	0.0226787	0.0241602	0.019	0.002	1	Gpr27	0.00102485	0.0504044	0.038	0.002	1	Gm14322	0.00697347	0.0279292	0.021	0.001	1	Ftl1	1.01516e-08	0.295058	1	0.998	0.0001942	Bcl3	0.0119149	0.0477326	0.051	0.016	1	Sall3	5.31775e-07	0.0832943	0.068	0.027	0.0107552	Bcor	1.36822e-06	0.204678	0.546	0.386	0.0276722	Smco4	0.00117741	0.0825968	0.08	0.022	1
Orc1	0.0226787	0.0241602	0.019	0.002	1	Tmem91	0.00102485	0.0504044	0.038	0.002	1	C030034L19Rik	0.00697347	0.0279292	0.021	0.001	1	Emb	1.02237e-08	0.1053	0.072	0.008	0.00019558	Svil	0.0119211	-0.227667	0.303	0.429	1	Eml5	5.65883e-07	-0.126654	0.916	0.964	0.011445	Inha	1.37908e-06	0.0683176	0.061	0.015	0.0278919	Lztfl1	0.0011823	-0.298774	0.821	0.862	1
Cfap99	0.0226787	0.0241602	0.019	0.002	1	Rgma	0.00102485	0.0504044	0.038	0.002	1	Gm43570	0.00697347	0.0279292	0.021	0.001	1	Lpgat1	1.0261e-08	-0.4617	0.518	0.717	0.000196293	Tnrc6b	0.0119235	-0.185742	0.99	0.994	1	Pkm	5.70801e-07	-0.131029	0.998	0.999	0.0115445	Inpp5b	1.42271e-06	0.0891638	0.103	0.036	0.0287744	Gnao1	0.00119792	0.285246	0.688	0.611	1
Gm35172	0.0226787	0.0241602	0.019	0.002	1	Fzd4	0.00102485	0.0504044	0.038	0.002	1	Olfml3	0.00697347	0.0279292	0.021	0.001	1	Lbhd1	1.05612e-08	-0.400561	0.386	0.618	0.000202036	H3f3b	0.012219	-0.0870251	1	1	1	Smim14	5.77163e-07	0.178228	0.546	0.454	0.0116731	Ash2l	1.44394e-06	0.217004	0.321	0.195	0.0292037	Gnas	0.00120245	0.2133	1	0.993	1
Sez6l	0.0226787	0.0241602	0.019	0.002	1	Lrrc8e	0.00102485	0.0504044	0.038	0.002	1	Vav3	0.00697347	0.0279292	0.021	0.001	1	Tuft1	1.12332e-08	0.120101	0.102	0.019	0.000214891	Aldh1l2	0.0122526	0.114375	0.04	0.011	1	Rbp4	5.85636e-07	0.0799249	0.041	0.011	0.0118445	Ptpn21	1.46842e-06	-0.240283	0.187	0.33	0.0296987	Glcci1	0.00121783	-0.276297	0.741	0.841	1
Tmem132d	0.0226787	0.0241602	0.019	0.002	1	Cdyl2	0.00102485	0.0504044	0.038	0.002	1	Fut9	0.00697347	0.0279292	0.021	0.001	1	Vopp1	1.16847e-08	-0.430523	0.554	0.777	0.000223529	Tbcc	0.0122915	0.147216	0.535	0.399	1	Gm35021	5.88732e-07	0.0818493	0.066	0.025	0.0119071	Eif2ak1	1.50073e-06	0.0958715	0.107	0.039	0.0303523	Wdr17	0.00123293	-0.34663	0.295	0.446	1
Sspo	0.0226787	0.0241602	0.019	0.002	1	Necab2	0.00102485	0.0504044	0.038	0.002	1	Cnr1	0.00697347	0.0279292	0.021	0.001	1	Plch2	1.22359e-08	-0.407169	0.277	0.497	0.000234073	Utrn	0.0123209	0.0532581	0.04	0.011	1	Fndc4	6.05594e-07	0.205671	0.232	0.157	0.0122481	Zfp445	1.50452e-06	-0.320301	0.416	0.548	0.0304288	Usp7	0.0012429	0.251596	0.5	0.33	1
Gm32592	0.0226787	0.0241602	0.019	0.002	1	Pcbd1	0.00102485	0.0504044	0.038	0.002	1	Spag8	0.00697347	0.0279292	0.021	0.001	1	Pcdh8	1.22462e-08	0.0931603	0.06	0.005	0.00023427	Zfp738	0.0123286	-0.216833	0.172	0.284	1	Dclk3	6.12981e-07	0.0537074	0.041	0.011	0.0123975	Rcan3	1.52916e-06	0.157693	0.172	0.08	0.0309272	Otud7b	0.00125103	-0.332398	0.741	0.794	1
Gm4651	0.0226787	0.0241602	0.019	0.002	1	Slc12a7	0.00102485	0.0504044	0.038	0.002	1	Bspry	0.00697347	0.0279292	0.021	0.001	1	Gchfr	1.23993e-08	0.158553	0.09	0.015	0.000237198	Iqgap1	0.0123719	-0.252367	0.263	0.374	1	Zcchc7	6.15024e-07	-0.147325	0.922	0.953	0.0124389	Rere	1.53019e-06	0.211665	0.37	0.241	0.0309482	Mapt	0.00126439	0.242148	0.152	0.063	1
Adm	0.0226787	0.0241602	0.019	0.002	1	Gm49492	0.00102485	0.0504044	0.038	0.002	1	Cyp4x1	0.00697347	0.0279292	0.021	0.001	1	Otx2	1.28538e-08	-0.333852	0.825	0.978	0.000245892	Ung	0.012414	0.0521513	0.04	0.011	1	Pdzd2	6.36548e-07	-0.206079	0.608	0.643	0.0128742	Ing1	1.54922e-06	0.157	0.29	0.166	0.0313329	Htra1	0.00126653	-0.309831	0.205	0.353	1
Prss53	0.0226787	0.0241602	0.019	0.002	1	Cpne5	0.00102485	0.0504044	0.038	0.002	1	Tex38	0.00697347	0.0279292	0.021	0.001	1	Mcc	1.31473e-08	0.129016	0.084	0.013	0.000251509	Dok1	0.012414	0.0521513	0.04	0.011	1	Synpo2	6.41145e-07	-0.184639	0.165	0.244	0.0129672	Uhrf1bp1l	1.58821e-06	0.0984026	0.111	0.041	0.0321216	Tmx1	0.00128011	-0.251196	0.83	0.909	1
Lpar2	0.0226787	0.0241602	0.019	0.002	1	Trhde	0.00103491	0.0988843	0.038	0.002	1	Ajap1	0.00697347	0.0279292	0.021	0.001	1	Bcl9	1.32093e-08	0.263016	0.373	0.179	0.000252694	Trak2	0.0124452	-0.196563	0.96	0.982	1	Lifr	6.54237e-07	-0.178634	0.724	0.77	0.0132319	Mbnl1	1.64993e-06	-0.276644	0.233	0.372	0.0333698	1110038B12Rik	0.00128537	0.246377	0.393	0.244	1
Gm36198	0.0226787	0.0241602	0.019	0.002	1	Fam171b	0.00104014	0.326451	0.38	0.217	1	Tmem52	0.00697347	0.0279292	0.021	0.001	1	Fam110b	1.32167e-08	0.0753565	0.06	0.005	0.000252836	Utp4	0.0124521	0.143337	0.172	0.095	1	Shisal1	6.79762e-07	0.158232	0.204	0.13	0.0137482	Tmem101	1.69252e-06	0.131891	0.198	0.098	0.0342313	Mif	0.0012864	0.231599	0.964	0.9	1
Oaf	0.0226787	0.0241602	0.019	0.002	1	Pip4k2c	0.0010425	-0.319426	0.19	0.374	1	Tmem88b	0.00697347	0.0279292	0.021	0.001	1	Rps10	1.32461e-08	0.296002	1	1	0.000253397	Rag1	0.0124561	0.0385918	0.02	0.003	1	Ammecr1	6.87279e-07	-0.229517	0.29	0.373	0.0139002	Smim40	1.74459e-06	-0.252596	0.802	0.851	0.0352844	Osgep	0.00129332	-0.381066	0.562	0.631	1
Rec114	0.0226787	0.0241602	0.019	0.002	1	Setbp1	0.00105315	0.109289	0.127	0.037	1	Kcnip4	0.00697347	0.0279292	0.021	0.001	1	Jund	1.33264e-08	0.463334	0.988	0.972	0.000254933	Gpr61	0.0124561	0.0385918	0.02	0.003	1	Tfg	6.9195e-07	0.133851	0.542	0.418	0.0139947	Chga	1.75264e-06	0.288437	0.355	0.233	0.0354472	Acvr1	0.00129404	0.150633	0.071	0.018	1
Gm27241	0.0226787	0.0241602	0.019	0.002	1	Elovl6	0.00107549	0.373033	0.266	0.129	1	Grk3	0.00697347	0.0279292	0.021	0.001	1	Ctsb	1.41536e-08	0.383924	0.627	0.42	0.000270758	Mex3a	0.0124851	0.243743	0.222	0.136	1	Glt28d2	7.21097e-07	-0.0982602	0.025	0.072	0.0145842	Lifr	1.78189e-06	-0.288054	0.298	0.437	0.0360388	Dclk1	0.00130692	0.16958	0.134	0.052	1
Gm47403	0.0226787	0.0241602	0.019	0.002	1	Adcy1	0.00109341	-0.360983	0.304	0.495	1	Gm10399	0.00697347	0.0279292	0.021	0.001	1	Tead1	1.43871e-08	0.352565	0.38	0.195	0.000275226	D430041D05Rik	0.012537	0.0374747	0.02	0.003	1	Osbp2	7.51786e-07	-0.218953	0.385	0.458	0.0152049	Eprs	1.78525e-06	0.251917	0.542	0.384	0.0361066	Myl6	0.00132903	0.26614	1	0.993	1
Spsb4	0.0226787	0.0241602	0.019	0.002	1	Nop16	0.00111049	0.245041	0.405	0.236	1	Prkar1b	0.00697347	0.0279292	0.021	0.001	1	Tax1bp3	1.49182e-08	0.144045	0.127	0.029	0.000285385	Shb	0.012537	0.0374747	0.02	0.003	1	Tmem38b	7.68996e-07	0.146498	0.243	0.166	0.0155529	Pcgf2	1.82811e-06	0.126935	0.13	0.053	0.0369735	Pck2	0.00133767	0.136699	0.071	0.018	1
Trf	0.0226787	0.0241602	0.019	0.002	1	Gabarap	0.00112403	0.2721	0.975	0.883	1	4930500L23Rik	0.00697347	0.0279292	0.021	0.001	1	Six3	1.49269e-08	0.449679	0.699	0.524	0.000285552	Itgae	0.0125775	0.0352432	0.02	0.003	1	Atp2b4	7.77953e-07	0.116549	0.1	0.049	0.0157341	Sbf2	1.84843e-06	0.17276	0.271	0.155	0.0373846	Tmem63b	0.00134789	0.192938	0.562	0.373	1
Gm47289	0.0226787	0.0241602	0.019	0.002	1	Mief1	0.00113118	0.115758	0.139	0.044	1	Atp6v1b1	0.00697347	0.0279292	0.021	0.001	1	Cuedc1	1.58024e-08	0.482007	0.735	0.555	0.0003023	Rps4x	0.0125868	0.149949	1	0.997	1	Dgke	8.08942e-07	-0.20376	0.373	0.456	0.0163609	Osbpl8	1.93469e-06	0.159057	0.26	0.145	0.0391291	Bbs7	0.0013567	-0.263071	0.17	0.323	1
1110002J07Rik	0.0226787	0.0241602	0.019	0.002	1	Ralgds	0.00113378	0.282681	0.228	0.103	1	Cracr2a	0.00697347	0.0279292	0.021	0.001	1	Sesn3	1.60328e-08	0.577775	0.542	0.363	0.000306708	Ccdc24	0.0125958	-0.204064	0.162	0.278	1	Mcrs1	8.41822e-07	0.128679	0.469	0.354	0.0170259	Caly	1.94763e-06	0.0521325	0.042	0.008	0.0393907	Slmap	0.0013939	-0.211873	0.152	0.315	1
Nav3	0.0226787	0.0241602	0.019	0.002	1	Cd63	0.00114313	0.357743	0.975	0.916	1	Smim17	0.00697347	0.0279292	0.021	0.001	1	Hk1	1.61808e-08	-0.40046	0.524	0.741	0.000309538	Snhg11	0.0126017	0.0400324	0.04	0.011	1	Ppdpf	8.45821e-07	0.148232	0.834	0.772	0.0171067	Stk38	1.96727e-06	0.200982	0.317	0.195	0.0397879	Rhob	0.00140623	0.321092	0.241	0.131	1
BC048403	0.0226787	0.0241602	0.019	0.002	1	Dll1	0.00115586	0.13206	0.101	0.026	1	Vstm2b	0.00697347	0.0279292	0.021	0.001	1	Ndufb2	1.67838e-08	-0.317513	0.976	0.982	0.000321075	Itm2c	0.0126133	0.153604	0.232	0.139	1	Dbndd2	8.5344e-07	0.157543	0.448	0.351	0.0172608	Mex3a	1.97466e-06	0.171181	0.202	0.104	0.0399375	Prnp	0.00141102	0.303894	0.964	0.955	1
Gpr75	0.0226787	0.0241602	0.019	0.002	1	Eef1a1	0.00120819	0.208728	1	1	1	Zfp977	0.00697347	0.0279292	0.021	0.001	1	Ndufb11	1.68527e-08	-0.311646	0.988	0.994	0.000322392	Gm16701	0.012618	0.0243779	0.02	0.003	1	Cerkl	8.73845e-07	-0.19844	0.508	0.579	0.0176735	Bmper	1.9903e-06	0.0301622	0.023	0.002	0.0402539	Gon4l	0.00143096	0.182316	0.589	0.407	1
Pimreg	0.0226787	0.0241602	0.019	0.002	1	Scn8a	0.00121789	0.240086	0.291	0.143	1	A230056P14Rik	0.00697347	0.0279292	0.021	0.001	1	Cerk	1.81027e-08	-0.423496	0.145	0.353	0.000346304	Slc10a5	0.012618	0.0243779	0.02	0.003	1	Nfe2l1	8.74823e-07	0.133392	0.566	0.451	0.0176933	Tmem117	1.9903e-06	0.0301622	0.023	0.002	0.0402539	Clip3	0.00143603	0.173275	0.259	0.136	1
Acsf2	0.0226787	0.0241602	0.019	0.002	1	Ppp3ca	0.0012288	0.347119	0.886	0.855	1	Gabrg3	0.00697347	0.0279292	0.021	0.001	1	Rps14	2.09082e-08	-0.23988	1	1	0.000399975	Tacr3	0.012618	0.0243779	0.02	0.003	1	Sec62	8.78406e-07	-0.149028	0.998	0.999	0.0177658	Vps13a	2.04819e-06	0.147349	0.145	0.063	0.0414247	Tanc2	0.00144933	0.103545	0.089	0.027	1
Gm11730	0.0226787	0.0241602	0.019	0.002	1	Ppm1d	0.00126524	0.232312	0.519	0.329	1	Gm39059	0.00697347	0.0279292	0.021	0.001	1	Ube2e2	2.12661e-08	0.202389	0.277	0.112	0.00040682	Nkain1	0.012618	0.0243779	0.02	0.003	1	Csn3	9.17419e-07	-0.258075	0.103	0.172	0.0185548	Insm1	2.06612e-06	-0.275743	0.721	0.778	0.0417872	Chd5	0.00145495	0.154259	0.089	0.027	1
Gm49692	0.0226787	0.0241602	0.019	0.002	1	Wdr70	0.00128723	-0.311739	0.19	0.376	1	Galnt18	0.00697347	0.0279292	0.021	0.001	1	Zeb2	2.24265e-08	0.31328	0.325	0.152	0.000429019	Nbl1	0.012618	0.0243779	0.02	0.003	1	Nell2	9.22561e-07	0.106868	0.102	0.051	0.0186588	Tmem169	2.18608e-06	0.0672559	0.053	0.012	0.0442134	Sun1	0.00147369	-0.27585	0.321	0.496	1
Gm29542	0.0226787	0.0241602	0.019	0.002	1	Plppr2	0.0012961	0.153071	0.177	0.068	1	Shcbp1	0.00697347	0.0279292	0.021	0.001	1	Rgs9	2.32991e-08	-0.421305	0.596	0.78	0.000445713	Kcna6	0.012618	0.0243779	0.02	0.003	1	Ubtd1	9.40242e-07	-0.191372	0.292	0.377	0.0190164	Dbi	2.3808e-06	-0.236817	0.927	0.947	0.0481517	Gapdh	0.00148042	-0.206098	1	1	1
Rhoj	0.0226787	0.0241602	0.019	0.002	1	Ndufs2	0.00130044	-0.24826	0.684	0.815	1	Gm35256	0.00697347	0.0279292	0.021	0.001	1	Fam149a	2.41706e-08	0.277635	0.355	0.172	0.000462383	Gm45479	0.012618	0.0243779	0.02	0.003	1	Asap1	9.44555e-07	0.141773	0.313	0.219	0.0191036	Crtac1	2.3954e-06	0.154795	0.214	0.112	0.048447	Tmtc3	0.00149292	-0.306028	0.179	0.323	1
Dglucy	0.0226787	0.0241602	0.019	0.002	1	Kbtbd2	0.0013093	0.228591	0.304	0.157	1	Gm9725	0.00697347	0.0279292	0.021	0.001	1	Lysmd3	2.61194e-08	0.235674	0.313	0.138	0.000499664	Tmem249	0.012618	0.0243779	0.02	0.003	1	Samd4	9.74848e-07	0.0982424	0.085	0.039	0.0197163	Dlg4	2.62227e-06	-0.302742	0.382	0.512	0.0530355	Ap3d1	0.00149929	0.283636	0.554	0.376	1
Gpld1	0.0226787	0.0241602	0.019	0.002	1	Fam120c	0.001317	0.182429	0.114	0.033	1	Pmfbp1	0.00697347	0.0279292	0.021	0.001	1	Rims3	2.66595e-08	0.0946639	0.054	0.004	0.000509996	Gm15657	0.012618	0.0243779	0.02	0.003	1	Ppp2r2d	9.87752e-07	0.124014	0.52	0.397	0.0199773	Stk10	2.67247e-06	0.0501741	0.038	0.006	0.0540507	Gas5	0.00150492	0.273698	0.991	0.971	1
Gm3604	0.0226787	0.0241602	0.019	0.002	1	Ireb2	0.00132113	0.253943	0.456	0.28	1	Cdh13	0.00697347	0.0279292	0.021	0.001	1	Myo1b	2.70881e-08	0.086536	0.054	0.004	0.000518196	1700120B22Rik	0.012618	0.0243779	0.02	0.003	1	Gucy2e	1.00316e-06	-0.210072	0.393	0.476	0.0202889	Srrm4	2.72248e-06	-0.308425	0.573	0.672	0.0550622	Camk2d	0.00151951	-0.219681	0.982	0.996	1
Gm48914	0.0226787	0.0241602	0.019	0.002	1	Sec23a	0.00132374	0.172342	0.291	0.143	1	Car12	0.00697347	0.0279292	0.021	0.001	1	Prkg1	2.75228e-08	0.086536	0.054	0.004	0.00052651	Ptpn5	0.0126182	0.0363585	0.02	0.003	1	C1ql3	1.02084e-06	0.243102	0.904	0.866	0.0206465	Pkp4	2.75495e-06	0.106715	0.118	0.047	0.055719	Ilk	0.00152335	0.218791	0.411	0.253	1
Gm49256	0.0226787	0.0241602	0.019	0.002	1	Plcd3	0.0013601	-0.226228	0.013	0.14	1	Elovl5	0.00697347	0.0279292	0.021	0.001	1	Cbx1	2.91414e-08	0.37016	0.855	0.745	0.000557476	Shc4	0.0126482	0.0393189	0.04	0.011	1	Aldh18a1	1.02382e-06	0.150085	0.127	0.071	0.0207067	Hmgb2	2.7739e-06	0.240913	0.443	0.31	0.0561022	Smim11	0.00152567	0.25983	0.67	0.536	1
Il17d	0.0226787	0.0241602	0.019	0.002	1	Ndfip1	0.00136533	-0.249663	1	0.998	1	Plscr1	0.00697347	0.0279292	0.021	0.001	1	6530402F18Rik	2.98771e-08	0.256077	0.241	0.094	0.000571549	Slc7a3	0.0126482	0.0382121	0.04	0.011	1	Wtap	1.02877e-06	0.114007	0.552	0.422	0.0208069	Bin1	2.78597e-06	-0.29626	0.416	0.551	0.0563463	Dph3	0.00153002	0.268599	0.634	0.455	1
Gm27017	0.0226787	0.0241602	0.019	0.002	1	Rbp4	0.00136607	0.380442	0.089	0.021	1	Gm37637	0.00697347	0.0279292	0.021	0.001	1	Serf2	3.07984e-08	-0.299484	0.964	0.992	0.000589173	Gm33727	0.0126729	0.0422282	0.04	0.011	1	Ppp1r2	1.0292e-06	0.119387	0.445	0.331	0.0208155	Cep290	2.78707e-06	-0.336525	0.527	0.64	0.0563685	Ddx1	0.00153765	-0.258308	0.688	0.792	1
Gm49595	0.0226787	0.0241602	0.019	0.002	1	Maml3	0.00139566	0.18821	0.19	0.077	1	Lsmem2	0.00697347	0.0279292	0.021	0.001	1	Glt28d2	3.14744e-08	-0.319167	0.018	0.191	0.000602106	Prom1	0.012698	-0.153012	1	1	1	Gm19938	1.03148e-06	0.154461	0.216	0.142	0.0208617	Cirbp	2.85245e-06	-0.260216	0.744	0.783	0.0576907	Gnat2	0.00154099	0.235846	0.152	0.066	1
Rtn4r	0.0226787	0.0241602	0.019	0.002	1	Ulk2	0.00140056	0.320329	0.316	0.182	1	Trim71	0.00697347	0.0279292	0.021	0.001	1	Gngt2	3.17793e-08	0.550341	0.976	0.995	0.000607938	Igfbp3	0.0126998	0.0232608	0.02	0.003	1	Gpt2	1.05886e-06	0.125346	0.077	0.034	0.0214154	Pkm	2.90804e-06	-0.231692	0.874	0.911	0.0588151	Atp1a2	0.0015616	0.14556	0.045	0.007	1
Gm26569	0.0226787	0.0241602	0.019	0.002	1	Ddr1	0.00140414	0.135123	0.114	0.033	1	Gm17399	0.00697347	0.0279292	0.021	0.001	1	Fabp7	3.25007e-08	0.775405	0.807	0.71	0.000621739	Mettl22	0.0127212	-0.141176	0.061	0.154	1	Dhrs3	1.17149e-06	-0.152694	0.154	0.232	0.0236934	Pcsk1n	2.92358e-06	0.182236	0.508	0.353	0.0591294	Nrtn	0.00156479	-0.341097	0.295	0.437	1
Gm46565	0.0226787	0.0241602	0.019	0.002	1	Pbx3	0.00141244	-0.306026	0.152	0.334	1	Moxd1	0.00697347	0.0279292	0.021	0.001	1	Vgll4	3.32056e-08	0.2264	0.169	0.051	0.000635224	Mrps18b	0.0127373	-0.137417	0.121	0.231	1	Nxnl2	1.19551e-06	-0.166552	0.903	0.936	0.0241792	Rnf187	2.9339e-06	0.180061	0.443	0.296	0.0593381	Ube2e2	0.00157084	0.155085	0.312	0.174	1
A230009B12Rik	0.0226787	0.0241602	0.019	0.002	1	Sem1	0.00141296	-0.236966	0.937	0.974	1	Tjp3	0.00697347	0.0279292	0.021	0.001	1	Impdh2	3.32743e-08	0.251299	0.355	0.171	0.000636536	Gm14488	0.0127821	0.0221446	0.02	0.003	1	Btbd7	1.20179e-06	-0.135569	0.743	0.817	0.0243062	Sez6l2	3.00569e-06	0.171151	0.248	0.139	0.0607901	Chd3	0.00157134	0.282571	0.661	0.502	1
Prss27	0.0226787	0.0241602	0.019	0.002	1	Eif4a2	0.00141502	0.267761	0.772	0.614	1	Anks1b	0.00697347	0.0279292	0.021	0.001	1	Camk2b	3.60004e-08	-0.353482	0.06	0.251	0.000688687	Rarg	0.0127821	0.0221446	0.02	0.003	1	Marcksl1	1.21438e-06	0.160152	0.762	0.719	0.0245607	Srcin1	3.03274e-06	0.100447	0.088	0.03	0.0613372	Gm28320	0.00159863	0.0255351	0.018	0	1
Gm50250	0.0226787	0.0241602	0.019	0.002	1	Glce	0.00142425	0.172714	0.127	0.04	1	Lin7a	0.00697347	0.0279292	0.021	0.001	1	Usp29	3.63726e-08	0.27639	0.241	0.094	0.000695809	Trmt6	0.0128523	-0.127032	0.101	0.208	1	Dcaf7	1.22245e-06	0.123576	0.48	0.359	0.0247241	Pnmal2	3.16021e-06	0.192632	0.267	0.156	0.0639153	Spint1	0.00159863	0.0255351	0.018	0	1
Tmem200c	0.0226787	0.0241602	0.019	0.002	1	Ndufs7	0.00142651	-0.291242	0.861	0.921	1	Rdh9	0.00697347	0.0279292	0.021	0.001	1	Id3	3.68455e-08	0.124552	0.09	0.016	0.000704854	Anp32a	0.0129014	-0.19776	0.899	0.926	1	Sbno2	1.22637e-06	0.131745	0.206	0.131	0.0248034	Creb5	3.19562e-06	0.0966727	0.095	0.034	0.0646313	Rhov	0.00159863	0.0255351	0.018	0	1
Gm15337	0.0226787	0.0241602	0.019	0.002	1	Ints4	0.00143234	0.167234	0.203	0.084	1	Pmel	0.00697347	0.0279292	0.021	0.001	1	Blcap	3.74755e-08	0.3057	0.349	0.172	0.000716906	Tceal8	0.0131034	0.223086	0.354	0.246	1	Gm5914	1.25695e-06	0.151439	0.744	0.658	0.0254219	Grk2	3.25778e-06	0.116027	0.149	0.067	0.0658886	Gm14327	0.00159863	0.0255351	0.018	0	1
Gm50209	0.0226787	0.0241602	0.019	0.002	1	Snrnp200	0.00144546	0.224283	0.544	0.357	1	Npc1l1	0.00697347	0.0279292	0.021	0.001	1	Gabrr3	3.93126e-08	0.121154	0.078	0.012	0.000752049	Nlk	0.0131161	-0.151081	1	0.997	1	Yeats4	1.26759e-06	-0.155442	0.869	0.912	0.0256369	Bcl9	3.28506e-06	0.157957	0.248	0.138	0.0664403	6430573P05Rik	0.00159863	0.0255351	0.018	0	1
Gm49403	0.0226787	0.0241602	0.019	0.002	1	Inip	0.00144752	0.163161	0.228	0.1	1	9930111J21Rik2	0.00697347	0.0279292	0.021	0.001	1	Cadm1	4.11961e-08	-0.40804	0.645	0.804	0.000788082	Tmcc1	0.013143	-0.239854	0.727	0.817	1	Bub1b	1.28171e-06	0.0714653	0.054	0.019	0.0259225	2025-03-03	3.43818e-06	0.046541	0.034	0.005	0.0695371	Npr1	0.00159863	0.0255351	0.018	0	1
A930028N01Rik	0.0226787	0.0241602	0.019	0.002	1	Ap2a1	0.00144996	0.211805	0.418	0.243	1	Trim16	0.00697347	0.0279292	0.021	0.001	1	Dop1b	4.15458e-08	0.106791	0.078	0.012	0.000794771	Grip1	0.0132582	0.156119	0.162	0.089	1	Crot	1.30634e-06	0.21128	0.197	0.127	0.0264207	Ndst4	3.44124e-06	0.065694	0.027	0.003	0.069599	Pifo	0.00159863	0.0255351	0.018	0	1
1700001K23Rik	0.0226787	0.0241602	0.019	0.002	1	Txn2	0.00145225	-0.312479	0.506	0.65	1	Glp2r	0.00697347	0.0279292	0.021	0.001	1	Pank1	4.16868e-08	0.113249	0.078	0.012	0.000797468	Mtdh	0.0132663	-0.214323	0.899	0.936	1	Kctd16	1.32548e-06	0.0939362	0.06	0.023	0.0268079	Dnah11	3.51345e-06	0.0338685	0.027	0.003	0.0710596	Drc1	0.00159863	0.0506261	0.018	0	1
Gm33466	0.0228266	0.0115968	0.019	0.002	1	Actg1	0.00145564	0.280897	1	0.965	1	Tmem95	0.00697347	0.0279292	0.021	0.001	1	Morf4l1	4.31234e-08	0.332222	0.94	0.903	0.00082495	Zfp592	0.0133365	-0.192986	0.182	0.295	1	1110038B12Rik	1.3339e-06	0.14171	0.384	0.281	0.0269781	Cldn23	3.52831e-06	0.038389	0.027	0.003	0.0713601	Gm15478	0.00159863	0.0255351	0.018	0	1
Sox5	0.0228266	0.0227589	0.019	0.002	1	Gsk3b	0.00146939	0.358426	0.848	0.846	1	Gp1ba	0.00697347	0.0279292	0.021	0.001	1	Sox11	4.37957e-08	0.203819	0.151	0.043	0.000837812	Dlg2	0.0133517	-0.243684	0.535	0.618	1	Lhfpl3	1.3362e-06	-0.178572	0.216	0.3	0.0270246	Atf5	3.58409e-06	0.111194	0.145	0.064	0.0724881	Thrsp	0.00159863	0.0255351	0.018	0	1
9330104G04Rik	0.0228266	0.0199603	0.019	0.002	1	Acvr2b	0.00147965	0.207773	0.456	0.271	1	Gm19967	0.00697347	0.0279292	0.021	0.001	1	4930578M01Rik	4.40169e-08	0.366109	0.337	0.166	0.000842043	Ttll5	0.013354	-0.209575	0.182	0.298	1	Zfp280d	1.36332e-06	-0.17263	0.75	0.809	0.0275731	Zdbf2	3.61764e-06	0.185432	0.256	0.147	0.0731667	Relt	0.00159863	0.0255351	0.018	0	1
Adcy7	0.0228266	0.0227589	0.019	0.002	1	Pank3	0.00148187	0.203056	0.304	0.154	1	1300014J16Rik	0.00697347	0.0279292	0.021	0.001	1	Tmsb4x	4.40611e-08	0.2828	0.988	0.981	0.00084289	Pus7l	0.013433	0.0773805	0.081	0.033	1	Gsdme	1.38999e-06	0.157225	0.315	0.226	0.0281126	Plec	3.69399e-06	0.0540793	0.05	0.011	0.074711	Ppfibp2	0.00159863	0.0255351	0.018	0	1
Plec	0.0228266	0.0227589	0.019	0.002	1	Snap25	0.00148821	-0.256028	0.987	0.991	1	Gm4787	0.00697347	0.0279292	0.021	0.001	1	Atpif1	4.88386e-08	0.327535	0.982	0.891	0.000934282	Plxna2	0.013456	-0.242479	0.848	0.847	1	Lgalsl	1.4579e-06	0.168955	0.963	0.923	0.029486	Nfia	3.88939e-06	0.120036	0.141	0.062	0.0786629	Gm45847	0.00159863	0.0255351	0.018	0	1
Emilin2	0.0228266	0.0227589	0.019	0.002	1	Fibp	0.00153287	0.215294	0.456	0.269	1	Acot6	0.00697347	0.0279292	0.021	0.001	1	Fosb	4.91175e-08	0.278935	0.108	0.023	0.000939619	Mllt11	0.0135255	0.216093	0.384	0.271	1	Wdr83os	1.47356e-06	0.104201	0.433	0.315	0.0298027	Mtss1	4.03894e-06	0.143904	0.198	0.102	0.0816875	Doc2a	0.00159863	0.0255351	0.018	0	1
Pcdhb3	0.0228266	0.0227589	0.019	0.002	1	Lcorl	0.00155469	0.53915	0.709	0.556	1	Gm20036	0.00697347	0.0279292	0.021	0.001	1	Uckl1os	5.04847e-08	-0.423762	0.355	0.555	0.000965773	2510017J16Rik	0.0136639	-0.101952	0.03	0.111	1	Stxbp1	1.47388e-06	-0.143744	0.89	0.926	0.0298092	Crym	4.40827e-06	-0.219467	0.779	0.851	0.0891573	Hapln4	0.00159863	0.0255351	0.018	0	1
Ppl	0.0229751	0.0213589	0.019	0.002	1	Diras2	0.00157022	0.323008	0.405	0.241	1	AI463229	0.00697347	0.0279292	0.021	0.001	1	Pmm1	5.07149e-08	-0.357085	0.223	0.45	0.000970176	Lsg1	0.0136656	0.163195	0.343	0.235	1	Dpysl2	1.49047e-06	0.114581	0.351	0.253	0.0301447	Plxna3	4.41127e-06	0.0587613	0.057	0.014	0.089218	Nrgn	0.00159863	0.0255351	0.018	0	1
Tmem176a	0.023009	0.202371	0.698	0.517	1	Asic4	0.00159308	0.159861	0.127	0.04	1	Anxa11	0.00697347	0.0279292	0.021	0.001	1	Fyn	5.10724e-08	0.165108	0.102	0.021	0.000977016	2210016L21Rik	0.0137724	0.162153	0.495	0.364	1	Tal2	1.49761e-06	0.0482659	0.027	0.005	0.0302891	Gulp1	4.47973e-06	-0.203098	0.13	0.258	0.0906026	Enpp1	0.00159863	0.0255351	0.018	0	1
Zfp326	0.0230124	0.314962	0.547	0.413	1	Rnf167	0.00159821	-0.282994	0.228	0.402	1	Gm49302	0.00697347	0.0279292	0.021	0.001	1	Lzts2	5.47512e-08	0.274761	0.301	0.139	0.00104739	Gm47689	0.0138743	0.108422	0.172	0.094	1	Cpe	1.51205e-06	-0.15266	0.959	0.981	0.0305812	Mdk	4.48825e-06	0.160634	0.244	0.135	0.0907748	Sstr2	0.00159863	0.0255351	0.018	0	1
Slc38a2	0.0230855	-0.315379	0.642	0.773	1	Fabp7	0.00161258	0.648524	0.823	0.72	1	Lacc1	0.00697347	0.0279292	0.021	0.001	1	Ccdc85a	5.50446e-08	0.0798673	0.048	0.003	0.001053	Wasl	0.0139359	0.213126	0.515	0.402	1	Klhl8	1.53455e-06	0.120684	0.197	0.126	0.0310362	Trib1	4.53551e-06	-0.300907	0.351	0.477	0.0917306	Gm49654	0.00159863	0.0255351	0.018	0	1
Slc19a1	0.0231029	0.186576	0.34	0.213	1	Zfp445	0.00161966	-0.336809	0.722	0.834	1	Enox1	0.00697347	0.0279292	0.021	0.001	1	Nog	5.50446e-08	0.0880412	0.048	0.003	0.001053	Vps26a	0.0139712	-0.169379	0.111	0.214	1	Hadha	1.59342e-06	-0.153575	0.717	0.771	0.032227	Zfp704	4.70242e-06	0.177215	0.302	0.182	0.0951065	Gpld1	0.00159863	0.0255351	0.018	0	1
Pex2	0.0232047	0.209969	0.509	0.368	1	Nt5dc2	0.00162122	0.305004	0.215	0.098	1	Nipal2	0.00697347	0.0279292	0.021	0.001	1	Hist1h3i	5.57465e-08	0.0633791	0.048	0.003	0.00106643	Uimc1	0.0139735	-0.23647	0.253	0.359	1	Foxp1	1.60378e-06	0.146026	0.487	0.373	0.0324365	Jam2	4.84131e-06	-0.217577	0.183	0.321	0.0979155	Bhmt	0.00159863	0.0255351	0.018	0	1
Camsap1	0.0232729	-0.244161	0.396	0.532	1	Rev3l	0.00163276	0.374463	0.57	0.439	1	Osr2	0.00697347	0.0279292	0.021	0.001	1	Egln2	5.57705e-08	0.28519	0.392	0.208	0.00106689	Ormdl2	0.0141146	0.170577	0.343	0.237	1	Cdk6	1.61066e-06	0.158695	0.2	0.13	0.0325756	Git2	5.00652e-06	0.24142	0.302	0.189	0.101257	5430414B19Rik	0.00159863	0.0255351	0.018	0	1
Rnaseh1	0.0233804	0.0915087	0.113	0.045	1	Lifr	0.0016621	-0.335453	0.392	0.563	1	Mapk12	0.00697347	0.0279292	0.021	0.001	1	Camk2n1	5.57705e-08	0.649848	0.47	0.301	0.00106689	Dmxl2	0.0141603	-0.19692	0.808	0.894	1	Rab27b	1.61484e-06	0.104176	0.108	0.056	0.03266	Itih5	5.02239e-06	0.0256031	0.019	0.001	0.101578	Scara5	0.00159863	0.0255351	0.018	0	1
Micos10	0.023444	0.219526	0.925	0.907	1	Cmss1	0.00166252	0.211178	0.203	0.086	1	Amigo2	0.00697347	0.0279292	0.021	0.001	1	Hopx	5.6778e-08	0.368042	0.199	0.071	0.00108616	Sema5a	0.0142251	0.132468	0.152	0.081	1	Tnr	1.63116e-06	0.067312	0.067	0.027	0.0329902	Cpne2	5.02239e-06	0.0256031	0.019	0.001	0.101578	Gpc5	0.00159863	0.0255351	0.018	0	1
Ncor1	0.0234851	0.232095	0.925	0.874	1	Car2	0.00167635	-0.30623	0.57	0.743	1	Pced1b	0.00697347	0.0279292	0.021	0.001	1	Lrrc28	5.73765e-08	0.213584	0.199	0.07	0.00109761	Tmem41b	0.0142279	-0.257811	0.374	0.464	1	Slc12a2	1.63253e-06	0.161644	0.404	0.311	0.033018	Dnah2	5.02239e-06	0.0256031	0.019	0.001	0.101578	Panx2	0.00159863	0.0255351	0.018	0	1
Ube2a	0.0235058	-0.229228	0.264	0.414	1	Haus1	0.00169879	0.204114	0.228	0.103	1	Chodl	0.00697347	0.0279292	0.021	0.001	1	Ywhab	5.93043e-08	0.351842	0.922	0.825	0.00113449	Clasp1	0.0142281	-0.195863	0.869	0.926	1	Gramd1b	1.69776e-06	-0.211478	0.465	0.518	0.0343372	Gm3693	5.02239e-06	0.0256031	0.019	0.001	0.101578	Gm50399	0.00159863	0.0255351	0.018	0	1
Gcsh	0.0235876	0.222991	0.472	0.344	1	Clta	0.00171418	-0.237984	0.987	0.979	1	Bricd5	0.00697347	0.0279292	0.021	0.001	1	Nfib	6.27315e-08	0.245891	0.108	0.024	0.00120005	Hgh1	0.0142602	0.114459	0.162	0.088	1	Cplx3	1.716e-06	0.159354	0.967	0.97	0.0347061	Bace2	5.02239e-06	0.0256031	0.019	0.001	0.101578	Rhod	0.00159863	0.0255351	0.018	0	1
Psen1	0.0236604	-0.154927	0.019	0.121	1	Cycs	0.00172898	-0.280125	0.861	0.897	1	Gm50062	0.00697347	0.0279292	0.021	0.001	1	Cerkl	6.27522e-08	-0.359098	0.127	0.332	0.00120045	Usp22	0.0144206	0.197939	0.444	0.328	1	Pmpcb	1.74582e-06	0.120809	0.497	0.382	0.0353092	Ptpro	5.07589e-06	0.138763	0.153	0.071	0.10266	4930518J20Rik	0.00159863	0.0255351	0.018	0	1
Stxbp2	0.0236984	-0.140438	0	0.089	1	Atp5e	0.00178208	-0.223585	1	0.995	1	Baiap3	0.00697347	0.0279292	0.021	0.001	1	Myd88	6.28702e-08	0.0835304	0.06	0.006	0.00120271	Plrg1	0.014523	0.122619	0.293	0.187	1	Unc5c	1.74778e-06	-0.156903	0.12	0.191	0.0353489	Slc46a1	5.09026e-06	0.0239353	0.019	0.001	0.10295	4631405J19Rik	0.00159863	0.0255351	0.018	0	1
Shf	0.0237418	0.118653	0.075	0.024	1	Rps14	0.00181011	-0.176978	1	1	1	Rgs11	0.00697347	0.0279292	0.021	0.001	1	Minar2	6.28702e-08	0.0835304	0.06	0.006	0.00120271	Epn1	0.0145283	0.181292	0.545	0.403	1	Nckap5	1.75933e-06	0.164812	0.129	0.072	0.0355825	9530068E07Rik	5.15406e-06	0.146506	0.237	0.13	0.104241	Sypl2	0.00159863	0.0255351	0.018	0	1
Zfp318	0.023976	0.248897	0.396	0.271	1	Apoe	0.00181981	0.576444	0.734	0.629	1	Psmb8	0.00697347	0.0279292	0.021	0.001	1	Rrh	6.42039e-08	0.0753565	0.06	0.006	0.00122822	Fgd6	0.0145607	0.0852134	0.131	0.065	1	Syn1	1.81035e-06	0.0997164	0.101	0.051	0.0366143	Trp53bp1	5.18993e-06	0.193099	0.294	0.178	0.104966	Clec4a1	0.00159863	0.0506261	0.018	0	1
Cers5	0.0240675	0.0874807	0.113	0.045	1	Eef1g	0.00182767	-0.333549	0.62	0.736	1	Treml4	0.00697347	0.0279292	0.021	0.001	1	Otud7a	6.51383e-08	0.08203	0.06	0.006	0.0012461	Sp4	0.0145682	-0.266443	0.455	0.542	1	Rps25	1.89161e-06	0.105759	1	1	0.0382578	Lrp4	5.2656e-06	-0.201368	0.08	0.195	0.106497	Cldn2	0.00159863	0.0255351	0.018	0	1
Spcs1	0.0241656	0.208089	0.849	0.72	1	Atp5g3	0.00183853	-0.210215	1	1	1	Sgo1	0.00697347	0.0279292	0.021	0.001	1	Soga3	6.60019e-08	0.374778	0.44	0.252	0.00126262	Aifm2	0.0145688	-0.102787	0.01	0.075	1	Jak1	1.91742e-06	0.1369	0.468	0.356	0.0387798	Hist3h2a	5.4154e-06	0.191721	0.302	0.186	0.109526	4933417E11Rik	0.00159863	0.0255351	0.018	0	1
Cd2bp2	0.0241834	0.143944	0.245	0.135	1	Ddx1	0.00185699	-0.314458	0.532	0.724	1	Rasgrp3	0.00697347	0.0279292	0.021	0.001	1	Hs3st3b1	6.6286e-08	-0.342528	0.175	0.391	0.00126805	Tmeff2	0.0147532	0.0843547	0.051	0.016	1	Nupr1	1.93181e-06	0.0652716	0.029	0.006	0.0390708	Ap3s2	5.67708e-06	0.172608	0.294	0.177	0.114819	Rgs5	0.00159865	0.0381351	0.018	0	1
Vegfa	0.024287	0.287488	0.415	0.279	1	Top1	0.00188788	0.244591	0.987	0.96	1	Gm17036	0.00697347	0.0279292	0.021	0.001	1	Cdc42	6.66071e-08	0.332129	0.898	0.804	0.00127419	Ddx1	0.0148069	-0.197604	0.677	0.762	1	mt-Cytb	2.00266e-06	0.1493	1	1	0.0405039	Rnf182	5.78538e-06	0.0805986	0.092	0.032	0.117009	4930589P08Rik	0.00159865	0.0381351	0.018	0	1
Ppp1ca	0.0244499	0.181563	0.792	0.646	1	Tnik	0.00189892	0.207819	0.304	0.159	1	Pcdha9	0.00697347	0.0279292	0.021	0.001	1	Cacna1h	7.07066e-08	0.234162	0.127	0.032	0.00135262	P4ha1	0.0148876	-0.192761	0.162	0.27	1	Btg3	2.02393e-06	0.118673	0.23	0.153	0.040934	Fam241a	5.86808e-06	0.0660956	0.069	0.02	0.118682	Sh2b2	0.00159865	0.0381351	0.018	0	1
Tgoln1	0.0247333	0.235032	0.415	0.274	1	Atp5f1	0.00191577	-0.232852	0.949	0.986	1	Pcdhgb1	0.00697347	0.0279292	0.021	0.001	1	Ifngr2	7.49304e-08	0.189898	0.217	0.081	0.00143342	Slc16a3	0.0149099	0.112261	0.081	0.033	1	Gm16062	2.06268e-06	0.211869	0.33	0.245	0.0417178	P2rx4	5.87307e-06	0.0835662	0.046	0.01	0.118783	Plbd1	0.00159865	0.0381351	0.018	0	1
Drc3	0.0247689	0.135288	0.302	0.175	1	Polr2k	0.0019384	-0.326884	0.722	0.799	1	Nfatc1	0.00697347	0.0279292	0.021	0.001	1	Atp5e	7.68655e-08	-0.263197	0.976	0.998	0.00147044	C1qtnf6	0.0149815	0.0821571	0.051	0.016	1	Zfp266	2.07652e-06	-0.158208	0.763	0.806	0.0419976	Phlda3	5.95716e-06	0.0609695	0.046	0.01	0.120484	Gm48529	0.00159865	0.0381351	0.018	0	1
Copb2	0.0248368	0.18798	0.604	0.455	1	Rps25	0.00194646	-0.215511	1	0.995	1	Gm50383	0.00697347	0.0279292	0.021	0.001	1	Ptger3	7.79612e-08	0.0428131	0.03	0	0.0014914	Gm4707	0.0150587	0.091423	0.141	0.073	1	Aak1	2.08597e-06	-0.159717	0.733	0.802	0.0421888	St8sia2	6.2244e-06	0.0957366	0.099	0.037	0.125888	Stab2	0.00159865	0.0381351	0.018	0	1
Brd3os	0.0249363	0.119399	0.283	0.161	1	Adgra3	0.00195238	0.14818	0.101	0.028	1	Tmem151a	0.00697347	0.0279292	0.021	0.001	1	Gm26826	7.79612e-08	0.0428131	0.03	0	0.0014914	Mir99ahg	0.0150837	0.0916305	0.071	0.027	1	Arhgap24	2.11464e-06	-0.1663	0.197	0.276	0.0427685	Tulp4	6.30837e-06	0.229659	0.443	0.313	0.127587	Gm16170	0.00159865	0.0381351	0.018	0	1
Hist1h4h	0.0250054	-0.212233	0.094	0.221	1	Psip1	0.00198179	0.298251	0.937	0.953	1	Vwce	0.00697347	0.0279292	0.021	0.001	1	F5	7.79649e-08	0.0512253	0.03	0	0.00149147	Mmadhc	0.0150972	-0.187086	0.202	0.315	1	Ypel4	2.13359e-06	0.0913569	0.054	0.02	0.0431519	Arl4c	6.32156e-06	0.14842	0.103	0.04	0.127854	Ccl4	0.00159865	0.0381351	0.018	0	1
A930037H05Rik	0.0250688	0.0689003	0.075	0.024	1	Ube2e2	0.00198372	0.145815	0.215	0.093	1	Lpxn	0.00697347	0.0279292	0.021	0.001	1	Saa2	7.79649e-08	0.0512253	0.03	0	0.00149147	Tep1	0.0151327	0.0668673	0.071	0.027	1	Atf4	2.22353e-06	0.227784	0.993	0.996	0.0449708	Zfp444	6.44845e-06	-0.250885	0.359	0.498	0.13042	Dgkb	0.00159865	0.0506261	0.018	0	1
Alg3	0.0251245	0.0944024	0.132	0.056	1	Klf3	0.00198706	0.143652	0.177	0.07	1	Gm20407	0.00697347	0.0279292	0.021	0.001	1	Gm11551	7.79649e-08	0.0512253	0.03	0	0.00149147	Zfp251	0.0151438	-0.152104	0.081	0.176	1	Dclk2	2.25428e-06	0.0600914	0.065	0.026	0.0455927	Mn1	6.49604e-06	0.0767732	0.076	0.024	0.131382	Catsper3	0.00159865	0.0381351	0.018	0	1
Zbtb18	0.0251776	0.236094	0.698	0.513	1	Fth1	0.0019956	-0.229918	1	1	1	Insl6	0.00697347	0.0279292	0.021	0.001	1	Cacna1e	7.79667e-08	0.0595888	0.03	0	0.0014915	Usp12	0.0151784	0.23561	0.525	0.418	1	Elob	2.2997e-06	0.115784	1	1	0.0465114	Ywhaq	6.57571e-06	0.25667	0.794	0.649	0.132994	Gm49542	0.00159865	0.0381351	0.018	0	1
Lrp10	0.0255091	-0.144986	0.019	0.119	1	Zfas1	0.00199778	0.225185	0.329	0.178	1	Gfra1	0.00697347	0.0279292	0.021	0.001	1	Tspan2	7.79671e-08	0.0679041	0.03	0	0.00149151	Thrb	0.0152854	-0.218923	0.525	0.649	1	Crtc3	2.31091e-06	-0.148483	0.711	0.754	0.0467382	Cdt1	6.63281e-06	0.0855683	0.061	0.017	0.134149	Plcxd3	0.00159865	0.0381351	0.018	0	1
Aasdhppt	0.0255542	0.239293	0.472	0.333	1	Cnn3	0.00199917	0.212174	0.177	0.072	1	Emx2os	0.00697347	0.0279292	0.021	0.001	1	Ccdc90b	7.99525e-08	0.259765	0.5	0.288	0.00152949	Ergic3	0.0153108	-0.219442	0.636	0.693	1	Mgarp	2.32866e-06	-0.193061	0.942	0.963	0.0470972	Ccdc88a	6.71154e-06	0.227876	0.477	0.35	0.135741	Rtn4r	0.00159865	0.0381351	0.018	0	1
Ift22	0.0256368	-0.224746	0.283	0.434	1	Yeats4	0.00202005	-0.322281	0.658	0.745	1	A730046J19Rik	0.00697347	0.0279292	0.021	0.001	1	Tmsb10	8.19324e-08	0.438063	0.976	0.933	0.00156737	Fam184a	0.01535	0.146681	0.374	0.26	1	Sat2	2.33334e-06	0.0694335	0.072	0.031	0.0471918	Smarca4	6.97488e-06	0.195203	0.477	0.337	0.141067	Runx1	0.00159865	0.0506261	0.018	0	1
Atxn7l3	0.0256979	0.110023	0.245	0.132	1	Myo5a	0.00203511	0.188271	0.241	0.112	1	Rgs20	0.00699361	-0.277024	0.104	0.289	1	Higd1a	8.50468e-08	-0.39046	0.675	0.812	0.00162695	Taf1b	0.0154512	0.142444	0.202	0.12	1	Arl13b	2.42906e-06	-0.212572	0.404	0.47	0.0491277	Zfp934	6.97766e-06	0.0415633	0.038	0.007	0.141123	Crip3	0.00159865	0.0381351	0.018	0	1
Vwa8	0.0258526	0.109049	0.113	0.046	1	Kctd9	0.0020519	0.13206	0.101	0.028	1	Gm11454	0.00704986	0.0261133	0.021	0.001	1	Atp5c1	8.56863e-08	-0.294797	0.982	0.98	0.00163918	Socs3	0.0155067	0.0816838	0.081	0.033	1	Trerf1	2.45032e-06	0.122827	0.151	0.089	0.0495578	Cmtm8	7.35225e-06	0.050778	0.05	0.012	0.148699	Gm7276	0.00159865	0.0381351	0.018	0	1
Gm37459	0.0258711	0.0682399	0.038	0.008	1	E130307A14Rik	0.00205382	0.153071	0.165	0.063	1	Crybg2	0.00704986	0.0261133	0.021	0.001	1	Acadvl	9.10449e-08	-0.319937	0.127	0.333	0.00174169	Moap1	0.0155151	0.0582333	0.051	0.016	1	Srgap3	2.48357e-06	0.117175	0.433	0.322	0.0502302	Scg3	7.72529e-06	0.216814	0.34	0.221	0.156244	A330040F15Rik	0.00159865	0.0630098	0.018	0	1
C2cd4b	0.0260878	0.160375	0.094	0.035	1	Inhbb	0.0020628	0.149561	0.177	0.07	1	5830444B04Rik	0.00704986	0.0206795	0.021	0.001	1	Morf4l2	9.22328e-08	0.409781	0.596	0.435	0.00176441	Irs1	0.0155613	0.0582024	0.071	0.027	1	Tuba4a	2.50236e-06	-0.13006	0.097	0.164	0.0506102	Ttyh3	7.74463e-06	0.175367	0.271	0.162	0.156635	Pgm5	0.00159865	0.0381351	0.018	0	1
Cxxc5	0.0261411	0.23129	0.811	0.651	1	Tox3	0.00207781	0.250688	0.253	0.119	1	Msl3l2	0.00704986	0.0224885	0.021	0.001	1	Mpdz	9.22868e-08	-0.351569	0.096	0.292	0.00176545	Xrcc6	0.015567	-0.175232	0.101	0.196	1	Nfu1	2.68363e-06	0.150793	0.431	0.332	0.0542765	Hip1r	7.91084e-06	0.0706471	0.073	0.023	0.159997	Lonrf3	0.00159865	0.0381351	0.018	0	1
Zfp646	0.0261952	0.172429	0.302	0.179	1	Zfyve19	0.00208757	0.154551	0.241	0.112	1	2610528A11Rik	0.00704986	0.0261133	0.021	0.001	1	Prag1	9.26324e-08	0.16549	0.127	0.032	0.00177206	Tulp1	0.0155911	-0.128082	1	1	1	Ilk	2.70022e-06	0.125186	0.407	0.302	0.054612	Inpp4a	8.2587e-06	0.0873953	0.095	0.035	0.167032	Cfap45	0.00159865	0.0506261	0.018	0	1
St3gal4	0.0262113	0.101213	0.17	0.081	1	Pcmtd2	0.00209326	-0.313133	0.595	0.729	1	Gm16861	0.00704986	0.0261133	0.021	0.001	1	Nat1	9.45424e-08	0.0565706	0.042	0.002	0.0018086	Trim46	0.0156058	0.0470902	0.03	0.007	1	Rgma	2.7537e-06	0.12606	0.139	0.082	0.0556937	Crebzf	8.38753e-06	-0.267771	0.313	0.439	0.169638	A530013C23Rik	0.00159865	0.0381351	0.018	0	1
Med15	0.026551	0.126553	0.264	0.148	1	Neurod4	0.0021052	-0.313887	0.203	0.397	1	Tbca	0.00707392	-0.3117	0.521	0.752	1	Gm48435	9.45424e-08	0.0565706	0.042	0.002	0.0018086	Uso1	0.015632	0.257759	0.475	0.376	1	Svbp	2.83477e-06	0.115023	0.414	0.313	0.0573333	Rasgrf2	8.63784e-06	-0.222106	0.172	0.306	0.1747	Gjc2	0.00159865	0.0506261	0.018	0	1
Cd59a	0.0266053	0.0422447	0.038	0.008	1	Pgc	0.00211295	-0.331933	0.038	0.173	1	Ndufb6	0.00709854	-0.262819	0.792	0.852	1	Tpst1	9.48039e-08	0.156265	0.169	0.053	0.0018136	B130046B21Rik	0.0157108	0.0459775	0.03	0.007	1	Trhde	2.89316e-06	0.0410513	0.036	0.01	0.0585141	Hc	8.65657e-06	0.0164255	0.011	0	0.175079	Grap2	0.00159865	0.0506261	0.018	0	1
Lrtm2	0.0266053	0.0422447	0.038	0.008	1	Hist4h4	0.00215598	0.09927	0.101	0.028	1	Mrpl12	0.00710944	-0.293901	0.292	0.496	1	Higd2a	9.52897e-08	0.358791	0.916	0.838	0.00182289	Tpd52l1	0.0157459	0.0437545	0.03	0.007	1	Tln1	3.0051e-06	0.121205	0.521	0.407	0.0607782	Gm14226	8.65657e-06	0.0164255	0.011	0	0.175079	Gm11815	0.00159865	0.0381351	0.018	0	1
Olfr675	0.0266053	0.0422447	0.038	0.008	1	Cadm4	0.00217529	0.0788928	0.076	0.016	1	Nfe2l1	0.00711362	0.302706	0.625	0.439	1	Cdh20	9.66317e-08	0.0952439	0.066	0.008	0.00184857	Serac1	0.0157513	0.0477326	0.051	0.016	1	Cnbp	3.02404e-06	0.132447	0.964	0.951	0.0611612	Gm42939	8.65657e-06	0.0164255	0.011	0	0.175079	Slc13a4	0.00159865	0.0381351	0.018	0	1
Mki67	0.0266053	0.0422447	0.038	0.008	1	Tcof1	0.00220718	0.247502	0.278	0.145	1	Cbx8	0.0072162	0.199157	0.292	0.146	1	Lpar6	9.84903e-08	0.118621	0.09	0.017	0.00188412	Nfe2l2	0.0158328	0.180227	0.354	0.246	1	Rps21	3.21735e-06	0.114089	1	0.999	0.0650708	1700086P04Rik	8.65657e-06	0.0164255	0.011	0	0.175079	Rcan1	0.00161748	0.296238	0.214	0.113	1
Spred2	0.0266053	0.0422447	0.038	0.008	1	Mcl1	0.00223032	0.251496	0.582	0.404	1	Blvrb	0.00722879	0.125888	0.188	0.076	1	Chd3	1.00754e-07	0.454342	0.518	0.336	0.00192742	Rho	0.0158448	-0.194155	1	0.986	1	Vdac3	3.22577e-06	0.160132	0.894	0.861	0.0652412	Myo18b	8.65657e-06	0.0164255	0.011	0	0.175079	Pkib	0.00162105	0.113616	0.062	0.014	1
Mfap4	0.0266053	0.0422447	0.038	0.008	1	G3bp1	0.00223715	0.303144	0.456	0.315	1	Trpm7	0.00724856	-0.266668	0.208	0.397	1	Gnb2	1.01296e-07	0.409836	0.922	0.774	0.00193779	Nlrc4	0.0158517	0.0437545	0.03	0.007	1	Strn3	3.2424e-06	-0.148482	0.763	0.813	0.0655776	Piwil4	8.65657e-06	0.0164255	0.011	0	0.175079	Scmh1	0.0016211	-0.264943	0.188	0.337	1
Tnfsf13os	0.0266053	0.0422447	0.038	0.008	1	Bub1b	0.00225748	0.0784596	0.051	0.007	1	Creld2	0.00728505	0.207495	0.292	0.15	1	Alkbh2	1.01443e-07	0.146669	0.151	0.044	0.00194061	Gpx8	0.0158612	0.0822857	0.101	0.046	1	Thyn1	3.4062e-06	0.12868	0.494	0.38	0.0688904	Gm11750	8.65657e-06	0.0164255	0.011	0	0.175079	A930012L18Rik	0.00162742	0.0771578	0.045	0.007	1
Mirg	0.0266053	0.0422447	0.038	0.008	1	Il11ra1	0.00225748	0.0784596	0.051	0.007	1	Mrpl15	0.00731843	-0.361591	0.417	0.589	1	Elmo2	1.0164e-07	0.230986	0.223	0.087	0.00194437	Abcd2	0.015891	0.158429	0.172	0.098	1	Mrpl36	3.42842e-06	0.0889844	0.469	0.345	0.0693399	Gm5820	8.65657e-06	0.0164255	0.011	0	0.175079	Sesn2	0.00164938	0.305103	0.17	0.081	1
Cox17	0.0266284	-0.213958	0.887	0.924	1	Egr2	0.00225748	0.112407	0.051	0.007	1	Slc9a3r1	0.00734855	0.110577	0.083	0.021	1	Rps21	1.03561e-07	-0.232517	1	1	0.00198112	Thrap3	0.0158989	-0.174434	0.727	0.813	1	Rrbp1	3.44531e-06	0.14385	0.458	0.347	0.0696814	Stac	8.65662e-06	0.0272729	0.011	0	0.17508	Bex3	0.00165545	0.292382	0.848	0.866	1
Nudt13	0.0267605	0.187571	0.189	0.099	1	Samd12	0.00225748	0.0784596	0.051	0.007	1	Golim4	0.00736417	-0.396495	0.375	0.541	1	Bex3	1.06677e-07	0.395626	0.705	0.553	0.00204074	Insyn1	0.0159217	0.0330151	0.03	0.007	1	Rtl8a	3.49394e-06	0.240512	0.693	0.628	0.070665	Gdnf	8.65662e-06	0.0218594	0.011	0	0.17508	Ncapg2	0.00165745	0.0649831	0.045	0.007	1
Rnf20	0.026765	0.229118	0.509	0.382	1	Micu1	0.00229672	0.22398	0.392	0.236	1	Uqcrh	0.00739018	-0.254955	1	0.999	1	Fat1	1.1104e-07	0.101785	0.072	0.01	0.00212419	Ttc25	0.0159573	-0.13493	0.03	0.105	1	Magi2	3.71987e-06	-0.135916	0.744	0.802	0.0752343	Pced1b	8.65662e-06	0.0218594	0.011	0	0.17508	Elfn2	0.00165777	0.117174	0.045	0.007	1
Osbpl6	0.0267924	0.0408514	0.038	0.008	1	Zdhhc17	0.00230406	0.239598	0.43	0.264	1	Cgn	0.00747107	0.149855	0.104	0.032	1	Bzw1	1.11625e-07	0.346265	0.795	0.669	0.00213539	Plekha2	0.0159859	-0.145734	0.081	0.177	1	R3hdm1	3.76416e-06	-0.129298	0.894	0.922	0.0761302	Nrip1	8.75855e-06	-0.304598	0.397	0.519	0.177142	Mrps18a	0.00165887	0.267261	0.571	0.394	1
Gm16172	0.0267924	0.0408514	0.038	0.008	1	Chst10	0.00230433	0.0611816	0.051	0.007	1	Ubtd1	0.00748628	-0.338341	0.375	0.546	1	Vegfa	1.14373e-07	0.307417	0.464	0.261	0.00218796	Tppp	0.0160286	0.0319023	0.03	0.007	1	Mrps18a	3.9329e-06	0.117281	0.539	0.424	0.0795428	Adar	9.14254e-06	0.110075	0.122	0.052	0.184908	Ndufa9	0.00166691	0.232643	0.607	0.412	1
Gabrb3	0.0268273	0.252226	0.283	0.173	1	Gm42702	0.00230433	0.0611816	0.051	0.007	1	Smim40	0.00749143	-0.261272	0.979	0.966	1	Pycr1	1.15122e-07	0.129016	0.072	0.01	0.00220229	Arf4os	0.0160286	0.0319023	0.03	0.007	1	Apold1	3.99607e-06	0.0395209	0.027	0.005	0.0808204	Atp9a	9.32891e-06	0.139207	0.263	0.153	0.188677	Tspan18	0.00168838	0.0841056	0.045	0.007	1
Fbxw5	0.0268579	0.119796	0.245	0.134	1	Cdca8	0.00230433	0.0611816	0.051	0.007	1	Rasl10b	0.00749596	-0.233893	0.021	0.165	1	Nos1	1.17151e-07	0.0910562	0.036	0.001	0.0022411	B230217O12Rik	0.0160286	0.0319023	0.03	0.007	1	Slc31a2	4.06263e-06	-0.193331	0.418	0.492	0.0821667	Atp10a	9.68329e-06	0.039566	0.034	0.006	0.195845	Rab3a	0.00169225	-0.20308	0.929	0.959	1
Zfp973	0.0268745	0.0571315	0.057	0.016	1	Begain	0.00230433	0.0611816	0.051	0.007	1	A330023F24Rik	0.00753012	0.130607	0.125	0.042	1	Hspb8	1.17759e-07	0.0663942	0.036	0.001	0.00225273	Kit	0.0160989	0.0741613	0.081	0.033	1	Tle3	4.10771e-06	0.0916572	0.093	0.046	0.0830785	Armc3	9.7645e-06	0.0210243	0.015	0.001	0.197487	Tnr	0.00169598	0.0624183	0.045	0.007	1
Gm14827	0.0268745	0.0571315	0.057	0.016	1	Cep72	0.00230433	0.0611816	0.051	0.007	1	Ndufb11	0.00756452	-0.248151	1	0.997	1	Pdlim7	1.22701e-07	0.385253	0.289	0.136	0.00234727	Mien1	0.0161047	0.212354	0.596	0.491	1	Glo1	4.13742e-06	-0.121585	1	0.999	0.0836793	Tcfl5	9.7645e-06	0.0210243	0.015	0.001	0.197487	Man1c1	0.00169598	0.0624183	0.045	0.007	1
Zmat1	0.0270107	0.122495	0.094	0.035	1	Zfp46	0.00231869	0.122257	0.114	0.035	1	Pkig	0.00758242	-0.265372	0.521	0.743	1	P3h4	1.32353e-07	0.153879	0.145	0.042	0.0025319	Gm20544	0.0161361	0.0307904	0.03	0.007	1	Dnajc2	4.23019e-06	0.116356	0.391	0.289	0.0855556	5031434O11Rik	9.7645e-06	0.0210243	0.015	0.001	0.197487	Irak2	0.00169598	0.0624183	0.045	0.007	1
Man2b2	0.0270813	0.0557489	0.057	0.016	1	1810010H24Rik	0.00231869	0.122257	0.114	0.035	1	D430019H16Rik	0.00758514	-0.27854	0.062	0.223	1	Dlg4	1.34085e-07	-0.380335	0.5	0.688	0.00256504	St13	0.0162149	-0.144764	0.949	0.978	1	mt-Atp6	4.3646e-06	0.130457	1	1	0.088274	Gm20627	9.7645e-06	0.0210243	0.015	0.001	0.197487	Zfp61	0.00170832	-0.247218	0.089	0.219	1
Sowahc	0.0270813	0.0557489	0.057	0.016	1	Eif3e	0.00233303	-0.313503	0.772	0.911	1	Jpt1	0.00758694	0.701545	0.438	0.296	1	Eif3a	1.34697e-07	0.400184	0.681	0.503	0.00257676	Gm38287	0.0162442	0.0296793	0.03	0.007	1	Mrfap1	4.40708e-06	0.114019	0.989	0.975	0.0891332	Ccdc146	9.7645e-06	0.0210243	0.015	0.001	0.197487	Cep57l1	0.00170881	-0.249435	0.107	0.238	1
Furin	0.0270878	0.174153	0.226	0.124	1	Cdk14	0.00233821	0.105728	0.063	0.012	1	Socs5	0.00768461	-0.246022	0.083	0.262	1	Aplp2	1.35491e-07	0.38444	0.904	0.821	0.00259195	Naprt	0.0162442	0.0296793	0.03	0.007	1	Ppp1r15a	4.49059e-06	0.191304	0.2	0.135	0.0908221	Galnt9	9.7645e-06	0.0210243	0.015	0.001	0.197487	Tbl1x	0.00171584	0.163416	0.589	0.387	1
Gm40155	0.0272894	0.0543677	0.057	0.016	1	Hnrnpr	0.00234108	0.328388	0.759	0.671	1	Hcfc1r1	0.007722	0.278606	0.604	0.419	1	Synpo2	1.47368e-07	-0.293479	0.06	0.241	0.00281915	Srrm4	0.0162768	-0.187901	0.929	0.99	1	9530034E10Rik	4.55293e-06	0.107476	0.096	0.049	0.092083	Atoh8	9.7645e-06	0.0210243	0.015	0.001	0.197487	Dlk1	0.00171784	0.167342	0.027	0.002	1
Ptpn23	0.0274354	-0.139989	0.019	0.117	1	Matr3	0.00234696	0.267761	0.797	0.657	1	Dbi	0.00772694	0.128585	0.667	0.507	1	Maml3	1.48792e-07	0.234811	0.223	0.088	0.0028464	Det1	0.0163396	0.12058	0.152	0.082	1	Memo1	4.56011e-06	-0.211118	0.404	0.471	0.0922281	Xcr1	9.7645e-06	0.0210243	0.015	0.001	0.197487	Cilp2	0.00172959	0.0604266	0.027	0.002	1
Nfyb	0.0274601	0.174762	0.453	0.307	1	Tsga10	0.00234916	0.198052	0.215	0.098	1	Zcwpw1	0.00778128	0.125402	0.125	0.042	1	Phip	1.49767e-07	0.430751	0.705	0.534	0.00286503	Cnrip1	0.0163641	-0.176331	0.657	0.786	1	Psmb4	4.6068e-06	0.131101	0.939	0.93	0.0931725	Ror2	9.7645e-06	0.0210243	0.015	0.001	0.197487	Hist1h3i	0.00172959	0.0848797	0.027	0.002	1
Rnf141	0.027487	0.0972067	0.151	0.069	1	Zdhhc14	0.00236884	0.0578382	0.051	0.007	1	2700062C07Rik	0.00778954	0.23886	0.312	0.165	1	Ndufc1	1.53761e-07	-0.301496	0.934	0.987	0.00294144	Hey2	0.0163673	-0.163253	0.101	0.2	1	Psd3	4.6577e-06	0.110433	0.149	0.09	0.0942021	Bhmt	9.7645e-06	0.0210243	0.015	0.001	0.197487	Siah3	0.00172959	0.127424	0.027	0.002	1
Myef2	0.027551	-0.249672	0.34	0.487	1	Ywhah	0.00239588	0.238467	0.481	0.306	1	Zc3h6	0.00780756	0.205995	0.208	0.092	1	Igfbp5	1.54858e-07	0.131625	0.054	0.005	0.00296244	Nmd3	0.0164017	0.173853	0.313	0.212	1	Anp32b	4.68957e-06	0.136525	0.929	0.912	0.0948465	Adam28	9.7645e-06	0.0210243	0.015	0.001	0.197487	Tac4	0.0017296	0.132576	0.027	0.002	1
2025-09-07	0.027645	0.256186	0.774	0.644	1	Ankrd33	0.00239836	-0.337916	0.241	0.414	1	Eif1	0.00783485	0.17263	1	0.999	1	Gdf11	1.54971e-07	0.195121	0.133	0.037	0.00296459	Cacna1g	0.0164094	0.0598537	0.061	0.022	1	Cenpv	4.82802e-06	0.125966	0.213	0.141	0.0976468	Clcf1	9.7645e-06	0.0210243	0.015	0.001	0.197487	Rp9	0.00173135	0.309977	0.705	0.625	1
Cops7a	0.0277247	0.176319	0.434	0.296	1	Slc1a4	0.00240619	0.088854	0.063	0.012	1	Dbndd2	0.00784126	0.322188	0.458	0.291	1	Enc1	1.58644e-07	0.335036	0.325	0.16	0.00303487	Ddx21	0.0165314	0.215709	0.485	0.363	1	Tcf4	4.8612e-06	-0.137523	0.899	0.943	0.0983178	Gm50321	9.7645e-06	0.0210243	0.015	0.001	0.197487	Galnt9	0.00174142	0.0480429	0.027	0.002	1
Setdb2	0.027774	0.208893	0.566	0.401	1	Kmt2a	0.00240913	0.279973	0.506	0.318	1	Rpl9-ps6	0.00785219	0.155178	0.271	0.131	1	Hmgcs1	1.65802e-07	0.274866	0.373	0.192	0.00317179	6530402F18Rik	0.0165758	-0.140269	0.101	0.202	1	Sh3bp4	4.92192e-06	0.119385	0.174	0.11	0.0995458	Foxd1	9.82294e-06	0.0387362	0.034	0.006	0.198669	Gm15635	0.00174142	0.0480429	0.027	0.002	1
Bend5	0.027905	0.129459	0.151	0.07	1	Ptgds	0.00241182	0.138126	0.127	0.042	1	Wdr91	0.0078589	0.149484	0.167	0.066	1	Elovl5	1.69653e-07	0.0656355	0.054	0.005	0.00324546	Man2a2	0.0165942	-0.229143	0.869	0.908	1	Hddc3	4.93676e-06	0.0970286	0.402	0.296	0.099846	Hectd2os	1.00002e-05	0.0460297	0.042	0.009	0.202255	Prima1	0.00174142	0.0480429	0.027	0.002	1
AW209491	0.028342	-0.14249	0.019	0.116	1	C1qtnf4	0.00242102	0.244257	0.316	0.175	1	Cklf	0.00788746	0.0813184	0.083	0.021	1	Arl3	1.79011e-07	-0.336745	0.795	0.911	0.00342448	Nsd1	0.0166312	-0.180025	0.949	0.97	1	Dusp26	4.94269e-06	0.192283	0.467	0.389	0.099966	Ankrd50	1.01792e-05	0.0965324	0.13	0.057	0.205874	Homer2	0.00175328	0.035552	0.027	0.002	1
Whrn	0.0283654	-0.236268	0.189	0.322	1	Pitpnc1	0.00243171	0.419863	0.57	0.425	1	Ahr	0.00820843	-0.22934	0.021	0.163	1	Sbf2	1.81512e-07	0.295499	0.386	0.207	0.00347232	Mib1	0.0166448	-0.185355	0.657	0.762	1	Ankrd17	4.96147e-06	-0.146813	0.847	0.877	0.100346	Atp1a3	1.02077e-05	-0.192225	0.851	0.885	0.206451	Dclk3	0.00175328	0.0701264	0.027	0.002	1
Pdcd6	0.0284243	0.136612	0.396	0.252	1	Zfp830	0.00245975	0.186949	0.316	0.171	1	Mgarp	0.0082114	-0.341029	0.917	0.946	1	Cyfip2	1.95006e-07	0.227578	0.181	0.064	0.00373046	Mrpl52	0.0166755	0.149882	0.758	0.646	1	Prpf38b	5.00236e-06	-0.122234	0.776	0.846	0.101173	Atf4	1.02537e-05	-0.260021	0.74	0.791	0.207381	Shisa9	0.00175328	0.035552	0.027	0.002	1
Tyw5	0.0284321	0.151463	0.189	0.096	1	Larp1b	0.00246998	0.145202	0.241	0.112	1	Srrm1	0.00830261	0.274049	0.896	0.792	1	Gsta4	1.99642e-07	0.202389	0.205	0.076	0.00381916	Hnrnpr	0.0167588	-0.182648	0.859	0.943	1	Pmm1	5.00854e-06	-0.154825	0.666	0.724	0.101298	Fmnl2	1.02973e-05	0.115314	0.145	0.067	0.208264	Slc22a8	0.00175328	0.035552	0.027	0.002	1
Ttc3	0.0285077	0.224246	0.774	0.674	1	A930019D19Rik	0.00247589	0.0717804	0.063	0.012	1	BC005561	0.00849127	0.374367	0.542	0.385	1	Rhobtb3	2.07755e-07	0.161542	0.145	0.043	0.00397436	Uqcc3	0.0167808	0.207914	0.788	0.695	1	Rps15	5.08162e-06	0.116091	1	1	0.102776	Fuca1	1.07534e-05	0.154553	0.271	0.162	0.217488	Map3k20	0.00176544	0.0713721	0.062	0.014	1
Wdr18	0.0285306	0.160432	0.283	0.167	1	Cpeb1	0.00247589	0.0717804	0.063	0.012	1	Mmab	0.00856169	0.147639	0.188	0.078	1	Cnn3	2.20577e-07	0.278797	0.211	0.083	0.00421964	Bcat1	0.0170268	-0.177882	0.697	0.744	1	Mrpl17	5.19903e-06	0.137853	0.763	0.675	0.10515	Pcmtd2	1.08232e-05	-0.283491	0.466	0.575	0.218899	Bcl11b	0.00176719	0.0399262	0.045	0.007	1
Pomt2	0.0285391	0.236772	0.377	0.25	1	Zfp61	0.00248164	0.164185	0.266	0.131	1	Prdm11	0.00862303	0.102798	0.042	0.006	1	Pogk	2.21021e-07	0.242619	0.355	0.18	0.00422814	Mfsd14a	0.0170673	-0.188353	0.192	0.303	1	Tspan31	5.44915e-06	0.103867	0.511	0.387	0.110209	Ank2	1.10018e-05	0.253615	0.599	0.453	0.222512	Tcfl5	0.00177744	0.0454644	0.027	0.002	1
Sccpdh	0.0287314	0.170505	0.245	0.138	1	Tuba1a	0.00248252	0.299265	0.975	0.986	1	Cbarp	0.00867213	0.078395	0.042	0.006	1	Sap30	2.22627e-07	0.209276	0.211	0.082	0.00425885	Zkscan14	0.0170925	0.14439	0.202	0.12	1	Elovl4	5.45364e-06	-0.131573	0.984	0.992	0.1103	Tns1	1.14337e-05	0.0293285	0.023	0.002	0.231246	Nucks1	0.00178064	0.243803	0.938	0.909	1
Hdac6	0.0290515	0.107628	0.208	0.108	1	Hs3st3b1	0.00248503	-0.309829	0.266	0.444	1	2900057B20Rik	0.00867213	0.078395	0.042	0.006	1	Ube3a	2.23781e-07	0.390652	0.765	0.632	0.00428093	Hp1bp3	0.0171156	-0.18307	0.838	0.897	1	Wdfy1	5.45532e-06	0.120225	0.547	0.43	0.110334	Adamtsl1	1.14337e-05	0.0293285	0.023	0.002	0.231246	B4gat1	0.00179971	-0.306099	0.205	0.344	1
Zfp768	0.0290657	0.117346	0.245	0.135	1	Zbtb7c	0.00250406	0.1783	0.203	0.089	1	mt-Co2	0.00867343	-0.180804	1	1	1	Trim35	2.32837e-07	0.299143	0.398	0.216	0.00445417	Tmem260	0.0171291	-0.238592	0.313	0.422	1	Pmp22	5.55321e-06	0.126353	0.113	0.063	0.112314	C1qtnf6	1.17826e-05	0.0549059	0.046	0.01	0.238303	Kmt5b	0.00181679	0.213956	0.741	0.52	1
Mrpl14	0.0293494	-0.226868	0.755	0.827	1	Cerkl	0.00250628	-0.28525	0.152	0.313	1	Zswim6	0.00871192	0.165645	0.188	0.078	1	Mex3a	2.33453e-07	0.208143	0.145	0.044	0.00446595	Ddost	0.0171488	-0.219606	0.232	0.337	1	Asxl2	5.65445e-06	-0.170466	0.704	0.748	0.114361	Mgll	1.20438e-05	0.0925981	0.126	0.054	0.243587	Rps5	0.00188673	0.175159	1	1	1
Slc22a17	0.0294035	-0.175587	0.113	0.25	1	Vps11	0.00250929	0.1783	0.228	0.107	1	Pole4	0.00873511	0.193056	0.229	0.107	1	Irf2bpl	2.4496e-07	0.323676	0.337	0.171	0.00468609	Tsr3	0.0172296	-0.184083	0.222	0.332	1	Snrk	5.66299e-06	-0.147758	0.877	0.906	0.114534	Mrps15	1.22465e-05	0.168137	0.225	0.127	0.247686	Rere	0.00189793	0.208434	0.589	0.403	1
Tbc1d19	0.0294502	0.133342	0.226	0.124	1	Nipsnap1	0.00251793	0.192016	0.228	0.107	1	Rcan1	0.00877549	0.157368	0.208	0.092	1	Tpr	2.48574e-07	0.344882	0.91	0.787	0.00475521	Nup93	0.0174184	0.127836	0.222	0.136	1	Cspp1	5.66548e-06	-0.13362	0.959	0.976	0.114584	Atoh7	1.23124e-05	0.036725	0.031	0.005	0.249017	Fzd10	0.00190168	0.0926856	0.054	0.011	1
Lemd2	0.0295556	0.15647	0.283	0.168	1	Zfp579	0.00252951	0.206361	0.38	0.222	1	Tra2a	0.00878115	-0.257024	0.521	0.752	1	Kazn	2.52173e-07	0.305849	0.386	0.213	0.00482406	Snx18	0.0174544	-0.164759	0.091	0.185	1	Pfdn4	5.77112e-06	0.0761791	0.479	0.36	0.116721	Rgs6	1.23124e-05	0.036725	0.031	0.005	0.249017	Ctnnbip1	0.00191072	0.215308	0.411	0.269	1
Bicd2	0.0295835	0.151205	0.264	0.153	1	Dgkz	0.00253793	0.102702	0.114	0.035	1	Ptp4a3	0.00879764	-0.237806	0.917	0.979	1	Ccdc50	2.54553e-07	0.271999	0.416	0.229	0.00486961	Dst	0.0174982	0.207905	0.253	0.164	1	Gm9925	5.83497e-06	0.042009	0.039	0.011	0.118012	Eml5	1.24769e-05	-0.245885	0.45	0.591	0.252346	Vdac3	0.00192854	0.178677	0.946	0.848	1
Tnip1	0.0296419	0.11164	0.132	0.058	1	Serf2	0.00254335	-0.228682	0.987	0.995	1	Gm42829	0.00892259	0.0498258	0.042	0.006	1	Cers6	2.60434e-07	0.08203	0.06	0.007	0.00498209	Zmat3	0.0175804	0.171699	0.232	0.148	1	Rps4x	5.9425e-06	0.107298	1	0.999	0.120187	Amfr	1.25477e-05	0.174249	0.313	0.199	0.253778	Glyr1	0.00197013	0.216799	0.589	0.416	1
Lcorl	0.0296585	0.168669	0.698	0.54	1	Cacna2d4	0.00254972	-0.291323	0.203	0.379	1	Cd151	0.00892259	0.0498258	0.042	0.006	1	Snrpd1	2.61504e-07	0.364446	0.747	0.649	0.00500257	4930481B07Rik	0.0176178	0.0521513	0.04	0.012	1	Riok3	6.01865e-06	-0.135895	0.814	0.849	0.121727	Igsf8	1.27199e-05	0.0880435	0.115	0.047	0.25726	Agpat3	0.0020035	-0.245605	0.973	0.987	1
Scpep1	0.0297408	0.0998203	0.151	0.07	1	Dync1i2	0.00255728	-0.280401	0.924	0.967	1	Gm11149	0.00892259	0.0498258	0.042	0.006	1	Ccdc107	2.65157e-07	0.371911	0.867	0.802	0.00507246	Zfp618	0.0176278	0.0970157	0.071	0.028	1	Bex3	6.06865e-06	0.112066	0.881	0.854	0.122738	Ints10	1.31306e-05	0.156081	0.275	0.166	0.265567	Gnb2	0.00203568	0.242381	0.973	0.973	1
Adprh	0.0298938	-0.184978	0.245	0.407	1	Cntnap2	0.00255882	0.168338	0.139	0.049	1	Hmga1b	0.00892259	0.0498258	0.042	0.006	1	Mbtps2	2.65506e-07	0.174375	0.211	0.081	0.00507914	Rpl26	0.0178134	0.132355	0.99	0.993	1	Rab11fip2	6.13236e-06	0.108553	0.531	0.408	0.124027	Ap5s1	1.33634e-05	0.0775862	0.076	0.025	0.270275	Icmt	0.00206214	-0.339424	0.393	0.511	1
Slc17a5	0.0298973	0.205398	0.17	0.086	1	Fbxo38	0.00256046	-0.168164	0.013	0.129	1	Pkmyt1	0.00892259	0.0498258	0.042	0.006	1	Synrg	2.68561e-07	-0.371986	0.518	0.701	0.00513758	Gatad2b	0.0178488	-0.162921	0.697	0.78	1	Sdc3	6.22743e-06	0.131355	0.27	0.191	0.12595	Dnaja1	1.34677e-05	0.221268	0.866	0.715	0.272384	Pbxip1	0.00207129	-0.19464	0.018	0.111	1
Akna	0.029899	0.125283	0.189	0.096	1	Net1	0.00256716	0.122184	0.127	0.042	1	Kifc5b	0.00892259	0.0498258	0.042	0.006	1	Igf1r	2.74247e-07	0.42468	0.723	0.575	0.00524635	Brd7	0.0180207	-0.202263	0.808	0.861	1	Akr1a1	6.24884e-06	0.119479	0.907	0.884	0.126383	Syt11	1.34782e-05	0.184972	0.317	0.202	0.272596	Tkt	0.00207266	0.183845	0.598	0.441	1
Snapc5	0.0299194	-0.206591	0.132	0.265	1	Crxos	0.0025768	-0.455399	0.405	0.554	1	St3gal2	0.00892531	0.180665	0.188	0.079	1	Sptbn1	2.76558e-07	0.325538	0.464	0.274	0.00529055	Tob2	0.0180889	-0.218133	0.899	0.887	1	Kdsr	6.31352e-06	-0.187691	0.315	0.395	0.127691	Epb41l1	1.37081e-05	0.077385	0.069	0.021	0.277246	Gm14508	0.00208426	-0.179019	0.018	0.111	1
Hmgn2	0.0299557	0.16675	1	0.999	1	Stat1	0.00259898	0.134098	0.19	0.079	1	Atp6v0a2	0.00893259	0.155718	0.208	0.092	1	Ldb1	2.83993e-07	0.197105	0.271	0.119	0.00543279	Kcng4	0.0181461	0.0806068	0.081	0.034	1	Smim13	6.34104e-06	0.164045	0.823	0.775	0.128248	Etv4	1.38534e-05	0.0322035	0.027	0.003	0.280184	Snrpd1	0.00210199	0.225742	0.938	0.889	1
Gabarap	0.0303011	-0.201007	0.925	0.921	1	Prkcz	0.00261403	-0.224444	0.127	0.292	1	Megf8	0.00900141	0.12225	0.167	0.066	1	Ryr2	2.87533e-07	0.294878	0.331	0.168	0.00550051	Meis2	0.01817	-0.248814	0.859	0.912	1	Hist4h4	6.3426e-06	0.176989	0.062	0.027	0.128279	Rin2	1.41895e-05	0.088038	0.092	0.034	0.286983	Hcfc1r1	0.00210294	0.354834	0.571	0.421	1
Rnpep	0.0304246	0.103661	0.094	0.036	1	Kazn	0.00264722	0.27814	0.38	0.229	1	Rras	0.00902499	0.0390191	0.042	0.006	1	Cfl2	2.93749e-07	0.378054	0.693	0.539	0.00561942	Gm49417	0.0181794	-0.0827735	0	0.054	1	Dusp16	6.42102e-06	0.141695	0.143	0.087	0.129865	Btbd3	1.42449e-05	0.0949331	0.099	0.039	0.288103	Trib1	0.00211405	-0.42266	0.473	0.547	1
Ckap5	0.0304836	0.273167	0.642	0.52	1	Dcun1d3	0.00265021	-0.210702	0.089	0.248	1	Mfhas1	0.00902803	-0.203231	0.021	0.165	1	Slc17a7	2.98137e-07	-0.412359	0.669	0.836	0.00570336	Ttyh3	0.01831	0.184632	0.303	0.202	1	Mmd2	6.50421e-06	-0.175173	0.276	0.355	0.131548	Axin2	1.42772e-05	0.0915743	0.095	0.036	0.288757	Tmem230	0.00211613	-0.363955	0.509	0.577	1
Bet1l	0.0304852	0.194431	0.34	0.218	1	Gucd1	0.00266509	-0.230692	0.063	0.203	1	Cadm1	0.00920388	-0.297069	0.562	0.741	1	Ndfip1	3.00024e-07	-0.336925	0.964	0.995	0.00573946	Rabggtb	0.0184135	0.189774	0.444	0.339	1	Slc7a11	6.58697e-06	0.101372	0.052	0.02	0.133221	Mapk4	1.43265e-05	0.0984026	0.099	0.039	0.289753	Nrip1	0.00212063	-0.193243	0.884	0.953	1
Foxred1	0.0305386	0.124015	0.189	0.096	1	Tpt1	0.00267797	0.219209	1	1	1	Ctsb	0.00937153	0.271714	0.604	0.422	1	Rab3b	3.02056e-07	0.138664	0.078	0.014	0.00577834	D030040B21Rik	0.0185605	0.0277343	0.01	0.001	1	Acot13	6.59442e-06	0.074452	0.463	0.347	0.133372	Gng3	1.44725e-05	0.204973	0.282	0.176	0.292706	Elmod2	0.00214243	-0.291768	0.286	0.441	1
Tshz1	0.030713	0.154232	0.132	0.059	1	Ddhd2	0.00271657	0.233709	0.253	0.129	1	Alad	0.00938401	0.265171	0.5	0.339	1	Tmem230	3.06941e-07	-0.387327	0.524	0.701	0.00587177	Gpr160	0.0185605	0.0277343	0.01	0.001	1	Tafa5	6.6539e-06	0.158683	0.228	0.159	0.134575	Agpat3	1.48544e-05	-0.246737	0.672	0.753	0.30043	Cplx1	0.0022187	0.278799	0.17	0.082	1
Epha5	0.0307404	0.243551	0.679	0.58	1	Pstk	0.00273041	0.173667	0.468	0.283	1	Xrcc4	0.0095383	-0.279715	0.104	0.274	1	Pcgf2	3.12266e-07	0.164802	0.163	0.053	0.00597365	Gm20754	0.0185605	0.0549037	0.01	0.001	1	Rai14	6.73362e-06	0.121412	0.114	0.064	0.136188	Lrrc4	1.49878e-05	0.0952073	0.107	0.043	0.303128	Zfp536	0.00222197	-0.284514	0.893	0.923	1
Xrcc2	0.0307802	0.0874807	0.113	0.047	1	Prkx	0.00274684	0.140526	0.177	0.072	1	Acsl1	0.00972424	-0.324751	0.604	0.72	1	Ap1s2	3.19946e-07	-0.401682	0.325	0.533	0.00612056	Ephb4	0.0185605	0.0277343	0.01	0.001	1	2025-03-11	6.74313e-06	0.0491321	0.024	0.004	0.13638	Cdk5rap2	1.50336e-05	0.0901214	0.107	0.043	0.304055	Son	0.00224082	-0.160198	1	1	1
Ppil6	0.0308589	0.118057	0.151	0.071	1	Cdc27	0.00276163	0.168338	0.165	0.065	1	Frmd4b	0.00973018	-0.3618	0.375	0.559	1	Fmnl2	3.22534e-07	0.198152	0.175	0.061	0.00617008	Gm28809	0.0185605	0.0277343	0.01	0.001	1	Tecpr1	6.81809e-06	-0.168166	0.663	0.694	0.137896	Nalcn	1.54483e-05	0.047686	0.038	0.008	0.312442	Dazap2	0.00224399	0.172931	0.464	0.297	1
Nprl3	0.0308897	0.0661627	0.075	0.025	1	2310039H08Rik	0.00283323	0.177819	0.38	0.217	1	Atp6v1e1	0.0098036	0.342623	0.958	0.859	1	Taok3	3.24339e-07	-0.345987	0.163	0.37	0.0062046	Gm44658	0.0185605	0.0277343	0.01	0.001	1	Snx6	6.93144e-06	0.0880812	0.407	0.302	0.140188	Gm13563	1.55123e-05	0.0432206	0.038	0.008	0.313736	Myo10	0.0022493	-0.262404	0.357	0.514	1
Zfp729a	0.0310793	-0.16577	0.057	0.171	1	Ndufb7	0.00283931	-0.24766	0.937	0.974	1	Commd1	0.00992186	0.213233	0.958	0.955	1	Slc9a3r1	3.39241e-07	0.0987985	0.072	0.012	0.00648967	Gm26740	0.0185605	0.0419482	0.01	0.001	1	Ldhb	7.07569e-06	-0.17018	0.753	0.787	0.143106	Camk2n2	1.56739e-05	0.0849834	0.099	0.039	0.317005	Hrk	0.00225402	0.26614	0.143	0.063	1
Mylip	0.0311087	-0.162338	0.019	0.113	1	Mpped2	0.00285101	0.347084	0.633	0.479	1	Nup43	0.00996931	0.144486	0.146	0.055	1	Epb41l3	3.40282e-07	0.301133	0.355	0.186	0.00650959	Mmp28	0.0185605	0.0277343	0.01	0.001	1	Ifitm10	7.19503e-06	0.0963079	0.204	0.135	0.14552	Ninl	1.5691e-05	0.0460297	0.038	0.008	0.31735	Ephb2	0.00226226	0.194646	0.232	0.12	1
Slbp	0.0312596	0.190016	0.264	0.157	1	Zfp319	0.0028512	0.144904	0.253	0.121	1	Adcy1	0.00997013	-0.319981	0.312	0.488	1	Rd3l	3.45379e-07	-0.483177	0.096	0.277	0.0066071	Gm48336	0.0185605	0.0419482	0.01	0.001	1	Mpdz	7.22199e-06	-0.176053	0.335	0.417	0.146065	Atp11b	1.60614e-05	-0.252291	0.313	0.442	0.324843	Crb2	0.00226505	-0.237302	0.054	0.161	1
Zdhhc5	0.0313439	-0.249161	0.226	0.359	1	Prom1	0.00290644	-0.263137	0.911	0.918	1	Hmgn2	0.0101046	0.217441	1	0.999	1	Ttyh1	3.50754e-07	-0.384439	0.175	0.371	0.00670993	Nid2	0.0185605	0.0277343	0.01	0.001	1	Isoc1	7.24336e-06	0.122573	0.188	0.123	0.146497	Myh10	1.63273e-05	0.14962	0.218	0.122	0.330219	Actr2	0.00226798	0.24217	0.518	0.355	1
Itga3	0.0313896	0.0620661	0.075	0.025	1	Rab2a	0.00291175	0.24988	0.962	0.944	1	Btd	0.0102119	0.108799	0.083	0.023	1	Rpl12	3.53354e-07	0.30829	0.994	0.952	0.00675967	Celsr1	0.0185605	0.0277343	0.01	0.001	1	Ddhd1	7.27077e-06	-0.197648	0.409	0.473	0.147051	Enc1	1.63989e-05	0.206668	0.233	0.136	0.331667	Fitm2	0.00227217	-0.184295	0.045	0.152	1
Rundc1	0.0314154	-0.128922	0	0.081	1	Ints6	0.00291347	0.217939	0.367	0.21	1	R3hcc1	0.0102623	0.169225	0.312	0.164	1	Arf4	3.53367e-07	0.288019	0.53	0.343	0.00675991	Bpifc	0.0185605	0.0277343	0.01	0.001	1	Thoc2	7.46832e-06	-0.137388	0.903	0.931	0.151047	Sipa1l2	1.64745e-05	0.0722782	0.073	0.024	0.333196	Paip1	0.00229344	0.233916	0.705	0.522	1
Nt5m	0.0314232	0.133725	0.321	0.195	1	Ccnl2	0.00298431	0.268809	0.595	0.416	1	Ptprs	0.0102906	0.192857	0.708	0.493	1	Ifrd2	3.55925e-07	0.141744	0.139	0.041	0.00680884	Aoc3	0.0185605	0.0277343	0.01	0.001	1	Jdp2	7.4737e-06	0.0705031	0.06	0.025	0.151156	Baz2b	1.71679e-05	-0.302925	0.538	0.629	0.34722	Gm10544	0.00231393	-0.286716	0.116	0.244	1
Zfp524	0.0314323	0.118249	0.132	0.059	1	Dpm3	0.00298754	-0.289409	0.785	0.82	1	Supt7l	0.0104137	0.203911	0.333	0.185	1	Pgk1	3.62908e-07	-0.420896	0.608	0.742	0.00694243	Fam20a	0.0185605	0.0277343	0.01	0.001	1	Tbc1d24	7.50604e-06	-0.208122	0.4	0.467	0.15181	Dnm3	1.73204e-05	-0.334349	0.42	0.529	0.350306	Ncam1	0.00233186	-0.203179	1	1	1
Rpp25l	0.0314779	0.133342	0.226	0.125	1	Rps15a	0.00302854	-0.191278	1	1	1	Gm6710	0.0104346	0.139324	0.146	0.055	1	Lgi1	3.67689e-07	0.0783621	0.048	0.004	0.0070339	Ppp3ca	0.0185748	-0.174694	0.99	0.99	1	Atad2b	7.68048e-06	-0.175244	0.652	0.685	0.155338	Rnf4	1.79526e-05	0.132061	0.237	0.135	0.363091	Midn	0.00233614	0.228553	0.598	0.437	1
Tcp11	0.0315398	-0.202672	0.113	0.241	1	Uqcr10	0.00304312	-0.29529	0.924	0.965	1	Arl6ip4	0.0106073	-0.308909	0.188	0.359	1	Lrp5	3.73333e-07	0.061874	0.048	0.004	0.00714187	Tmem129	0.0185865	0.127739	0.232	0.144	1	C2cd4b	7.75631e-06	0.0994948	0.083	0.04	0.156871	Idh2	1.80951e-05	0.11752	0.191	0.101	0.365974	Wdr60	0.00235071	-0.375864	0.527	0.6	1
Ubr4	0.0320369	0.214628	0.396	0.276	1	Kif3b	0.00304451	-0.318888	0.19	0.346	1	Mreg	0.0106396	0.137667	0.208	0.093	1	Celf1	3.77897e-07	0.296943	0.747	0.574	0.00722916	Gm29695	0.0186596	0.013379	0.01	0.001	1	Eif4ebp2	7.75695e-06	0.0910373	0.394	0.29	0.156884	2310022B05Rik	1.8271e-05	0.0923105	0.122	0.053	0.369532	Ctnnbl1	0.00235211	0.143361	0.455	0.285	1
Jmjd1c	0.0321016	0.339008	0.679	0.613	1	Nfil3	0.00305125	0.224987	0.114	0.037	1	Gnasas1	0.0106464	0.0675882	0.062	0.014	1	Rdx	3.98063e-07	0.308431	0.91	0.788	0.00761494	Ptprc	0.0186596	0.013379	0.01	0.001	1	Chd9	7.7681e-06	-0.151071	0.858	0.886	0.15711	Setd7	1.85508e-05	0.0998823	0.099	0.039	0.375191	Kctd16	0.0023524	0.187798	0.071	0.02	1
Mir124-2hg	0.0321444	-0.366716	0.868	0.883	1	Arl14ep	0.00306634	0.245041	0.215	0.1	1	Gm15706	0.0106659	-0.305771	0.146	0.322	1	Ttc9c	4.24423e-07	0.257766	0.331	0.17	0.00811921	3110045C21Rik	0.0186596	0.013379	0.01	0.001	1	Gpr19	7.78838e-06	0.100327	0.111	0.062	0.15752	Fam155a	1.86246e-05	0.0792136	0.076	0.026	0.376683	H3f3a	0.00236813	-0.160474	1	1	1
Arid5b	0.0322609	0.157656	0.226	0.125	1	Rpl10	0.00307538	0.32553	0.975	0.902	1	Lpgat1	0.0106704	-0.397067	0.583	0.704	1	Rps9	4.49398e-07	0.244428	1	0.999	0.00859699	Fcgr4	0.0186596	0.013379	0.01	0.001	1	Hikeshi	7.92561e-06	0.092195	0.435	0.323	0.160295	Tnrc6c	1.88078e-05	0.231422	0.618	0.478	0.380387	Tnfaip8	0.00238239	0.128032	0.089	0.029	1
Kctd6	0.0325088	-0.121193	0	0.08	1	Acrbp	0.00312197	0.0891639	0.089	0.023	1	Cox6b1	0.0107653	-0.223332	0.979	0.999	1	Ppp1ca	4.6033e-07	0.313233	0.777	0.641	0.0088061	Kcnt1	0.0186596	0.013379	0.01	0.001	1	Rgs7	8.01973e-06	0.0781973	0.077	0.036	0.162199	Prdx4	1.88079e-05	0.116027	0.141	0.067	0.38039	Rbpj	0.00240414	0.175314	0.527	0.342	1
Ap2s1	0.032637	0.145817	0.717	0.533	1	Dbn1	0.0031239	0.192109	0.165	0.068	1	Wwox	0.0107724	0.142381	0.312	0.161	1	Cntnap2	4.67452e-07	0.12263	0.139	0.041	0.00894235	Gm26558	0.0186596	0.013379	0.01	0.001	1	Rtl8b	8.10691e-06	0.135015	0.351	0.264	0.163962	Rexo2	1.89271e-05	0.154608	0.26	0.155	0.3828	Stxbp1	0.00243336	-0.222019	0.759	0.871	1
Hk2	0.0327001	0.0918754	0.226	0.121	1	Cyth2	0.00313267	-0.288139	0.266	0.432	1	Adal	0.0107765	-0.207898	0.021	0.155	1	Ano10	4.72998e-07	0.165359	0.175	0.061	0.00904846	4921511C10Rik	0.0186596	0.013379	0.01	0.001	1	Socs3	8.29169e-06	0.141733	0.174	0.112	0.167699	Cacng2	1.89489e-05	0.0925981	0.069	0.022	0.383242	Syndig1l	0.00245615	0.138033	0.071	0.02	1
Mrpl28	0.0328908	0.205604	0.642	0.536	1	Fam219a	0.00314181	0.194415	0.19	0.084	1	Plppr2	0.0107926	0.222334	0.208	0.097	1	Klhl23	5.03757e-07	0.350835	0.367	0.195	0.00963688	Kcnn3	0.0186596	0.013379	0.01	0.001	1	Ptprd	8.51258e-06	0.108113	0.242	0.163	0.172167	Numa1	1.95869e-05	0.148453	0.256	0.152	0.396145	Ctnna1	0.00247757	0.150645	0.571	0.378	1
Zfp623	0.032942	0.0762893	0.094	0.036	1	Srrm2	0.00314951	0.238531	1	0.958	1	Poc1a	0.0108111	0.109359	0.104	0.033	1	Khdrbs3	5.27513e-07	0.269592	0.554	0.356	0.0100913	Pakap.1	0.0186596	0.013379	0.01	0.001	1	Tmem132e	8.64752e-06	0.0527223	0.044	0.015	0.174896	Unc80	1.98619e-05	-0.218659	0.286	0.423	0.401707	Mettl14	0.00248586	-0.229824	0.098	0.224	1
Gnaq	0.0329968	0.234542	0.377	0.256	1	Cnot8	0.00315259	0.226789	0.278	0.147	1	Cacnb2	0.0108126	-0.243723	0.125	0.303	1	Ppp1r14b	5.28512e-07	0.266058	0.253	0.114	0.0101104	Gm12786	0.0186596	0.013379	0.01	0.001	1	Rc3h2	9.00022e-06	-0.17203	0.631	0.677	0.182029	Fras1	2.00044e-05	0.0504771	0.042	0.009	0.404588	Riok3	0.00248899	-0.24847	0.732	0.823	1
Sdhaf1	0.0330066	0.273624	0.528	0.425	1	Cerk	0.00318649	-0.317752	0.165	0.327	1	Tcf12	0.0108509	-0.24534	0.292	0.508	1	Stxbp1	5.30055e-07	-0.355071	0.59	0.757	0.01014	Smpdl3b	0.0186596	0.013379	0.01	0.001	1	Kdelr1	9.0244e-06	0.085369	0.404	0.302	0.182518	Xist	2.0025e-05	-0.243447	0.721	0.888	0.405006	Map7d2	0.00251412	0.22337	0.241	0.131	1
Cdk9	0.0335892	0.158513	0.302	0.186	1	Junb	0.00319723	0.474806	0.494	0.35	1	Zdhhc2	0.0108662	-0.32757	0.521	0.696	1	Frmd6	5.38673e-07	0.198111	0.157	0.052	0.0103048	Gm43112	0.0186596	0.013379	0.01	0.001	1	Atp6v1f	9.19416e-06	0.11459	0.96	0.94	0.185952	Map7d1	2.04149e-05	0.122789	0.187	0.098	0.412891	Mtfp1	0.00251693	-0.323844	0.33	0.477	1
Clk3	0.0336159	0.138335	0.321	0.198	1	Ybx3	0.00321311	-0.274333	0.911	0.949	1	Eif3j2	0.0109177	0.145077	0.375	0.207	1	Actg1	5.96795e-07	0.364871	0.988	0.973	0.0114167	Gm40264	0.0186596	0.013379	0.01	0.001	1	Doc2b	9.24986e-06	-0.157246	0.256	0.331	0.187078	Cadm4	2.05876e-05	0.127187	0.164	0.083	0.416384	Atpif1	0.00251703	0.259532	0.991	0.98	1
Hdac9	0.0336289	0.15647	0.264	0.156	1	Zcchc14	0.00321346	0.152643	0.278	0.14	1	Shf	0.0109521	0.0795427	0.083	0.023	1	Cisd1	6.04085e-07	-0.349133	0.789	0.885	0.0115562	Rhoh	0.0186596	0.013379	0.01	0.001	1	Dbn1	9.35691e-06	0.119774	0.268	0.189	0.189243	Srgap1	2.10251e-05	0.0851552	0.099	0.039	0.425232	Usp22	0.0025401	0.26065	0.536	0.389	1
Zfp110	0.0336745	-0.144986	0.019	0.111	1	Klf9	0.00321721	-0.27525	0.911	0.925	1	Nqo2	0.0110398	0.0946549	0.104	0.033	1	Hnrnpr	6.04171e-07	0.330145	0.783	0.657	0.0115578	Cav2	0.0186596	0.013379	0.01	0.001	1	Arf5	9.57432e-06	0.131886	0.976	0.967	0.193641	Plxdc2	2.10814e-05	0.0993915	0.073	0.024	0.426371	Arhgap24	0.00256155	-0.270073	0.107	0.231	1
Atf4	0.0338757	0.168373	0.981	0.867	1	Gm6598	0.00321924	0.0858739	0.089	0.023	1	Med13l	0.0110885	-0.331387	0.229	0.402	1	Atp5f1	6.317e-07	-0.284517	0.958	0.969	0.0120844	Tbxas1	0.0186596	0.013379	0.01	0.001	1	Lman1	9.64614e-06	-0.115787	0.999	0.998	0.195093	Xrcc5	2.14252e-05	0.103958	0.13	0.059	0.433325	Zbtb43	0.00258189	-0.298358	0.196	0.332	1
Ankrd26	0.0338959	0.0901858	0.189	0.095	1	Gm9918	0.00322431	0.261042	0.354	0.208	1	Rreb1	0.011094	0.289247	0.375	0.233	1	Pik3ip1	6.3441e-07	0.125367	0.108	0.027	0.0121363	4930599N23Rik	0.0186596	0.013379	0.01	0.001	1	Ppm1n	9.90876e-06	-0.172144	0.271	0.351	0.200405	Nkd1	2.16292e-05	0.091223	0.107	0.044	0.437451	Meg3	0.00260532	0.298158	0.92	0.841	1
Nt5dc2	0.033974	0.221948	0.208	0.111	1	Pbx1	0.00324921	0.330497	0.684	0.547	1	Pacsin2	0.0111204	-0.295358	0.229	0.415	1	Rpl6	6.68251e-07	0.277474	1	0.999	0.0127836	Rab19	0.0186596	0.013379	0.01	0.001	1	Lmna	9.91682e-06	0.0553395	0.051	0.019	0.200568	Ppp1r12a	2.2234e-05	0.191787	0.412	0.291	0.449682	Cdv3	0.00261736	0.367841	0.554	0.416	1
Tbc1d9	0.0339959	0.212797	0.283	0.172	1	Arhgap24	0.00325659	-0.25909	0.139	0.294	1	Lsm5	0.0111418	-0.288059	0.292	0.468	1	Zfp212	6.77107e-07	0.19967	0.235	0.101	0.0129531	Gm17089	0.0186596	0.013379	0.01	0.001	1	Srpr	9.94987e-06	0.118981	0.569	0.448	0.201236	Disp2	2.23853e-05	0.0639602	0.053	0.014	0.452743	Ptpmt1	0.00262709	-0.263347	0.214	0.353	1
Maml2	0.03404	0.0785229	0.057	0.017	1	Ndufab1	0.00328731	-0.272101	0.911	0.953	1	Cabp1	0.0112347	0.075998	0.083	0.023	1	Srsf1	6.78175e-07	0.349306	0.705	0.558	0.0129735	Prr19	0.0186596	0.013379	0.01	0.001	1	Polg2	9.99781e-06	-0.129631	0.154	0.225	0.202206	Mmp16	2.27877e-05	0.0808428	0.073	0.024	0.460882	Synpo2	0.00263869	-0.209688	0.107	0.24	1
Cmtr1	0.0342188	0.151972	0.358	0.231	1	Raly	0.00330759	-0.334463	0.608	0.717	1	Fau	0.0112717	-0.177816	1	1	1	Rab3ip	7.32793e-07	0.267978	0.343	0.179	0.0140183	Gm44686	0.0186596	0.013379	0.01	0.001	1	Xpo1	1.01023e-05	0.147067	0.462	0.361	0.204319	Bcl7c	2.29074e-05	0.15794	0.302	0.189	0.463303	Cox5a	0.00266979	-0.160793	1	1	1
Mrps18b	0.034598	-0.179793	0.094	0.217	1	Satb1	0.00334813	0.186005	0.228	0.11	1	Nans	0.0113414	0.152425	0.208	0.095	1	Mios	7.38707e-07	0.183005	0.211	0.085	0.0141315	Vmn2r76	0.0186596	0.013379	0.01	0.001	1	Pde7b	1.01347e-05	0.049165	0.063	0.027	0.204974	Tuba1a	2.30675e-05	0.202391	1	0.995	0.46654	Tmem59	0.00267107	-0.250494	1	0.975	1
Rab12	0.0347096	0.132969	0.34	0.212	1	Ano10	0.00338115	0.125096	0.165	0.065	1	Psip1	0.011359	0.271709	0.958	0.917	1	Rp9	7.41431e-07	0.333413	0.506	0.335	0.0141836	Nox4	0.0186596	0.0266147	0.01	0.001	1	Rab24	1.02116e-05	0.102406	0.513	0.398	0.20653	Map2	2.30833e-05	-0.244618	0.721	0.777	0.46686	Cpm	0.00270721	-0.160956	0.018	0.108	1
Pigg	0.0347924	0.0893942	0.151	0.071	1	Git1	0.00338426	0.118898	0.165	0.065	1	Spred1	0.0114181	0.184807	0.146	0.057	1	Unc80	7.43292e-07	0.377476	0.608	0.436	0.0142192	Rab38	0.0186596	0.013379	0.01	0.001	1	Otud7b	1.02744e-05	-0.165195	0.898	0.909	0.207801	Cbarp	2.32366e-05	0.0816582	0.073	0.024	0.46996	Dlgap1	0.00274821	0.33098	0.134	0.057	1
Snhg16	0.0348859	-0.116017	0	0.078	1	Coro1c	0.00338427	0.115758	0.165	0.065	1	Tmcc2	0.0114628	-0.219822	0.042	0.184	1	Cspg5	7.65197e-07	0.343192	0.892	0.758	0.0146382	Tsku	0.0186596	0.013379	0.01	0.001	1	Gzmn	1.0412e-05	0.0801184	0.034	0.01	0.210583	Nrxn2	2.35482e-05	0.104537	0.111	0.047	0.476263	Ergic2	0.00276045	0.24986	0.616	0.455	1
Fbxo33	0.0348859	-0.116017	0	0.078	1	E130218I03Rik	0.00340035	-0.280278	0.266	0.439	1	Rps27a	0.011472	0.178344	1	1	1	Nfkb1	7.72358e-07	0.108785	0.078	0.015	0.0147752	Wnt11	0.0186596	0.013379	0.01	0.001	1	Ybx3	1.04892e-05	-0.141548	0.995	0.996	0.212144	Nt5c2	2.38253e-05	0.13416	0.187	0.1	0.481867	Uqcc2	0.00276674	0.244217	0.848	0.763	1
Pdk3	0.034974	0.134639	0.151	0.073	1	Tgfbr1	0.00340051	0.284529	0.392	0.25	1	Dhx32	0.0115025	0.175343	0.417	0.248	1	Prkca	7.7862e-07	-0.31715	0.163	0.363	0.014895	Hs3st2	0.0186596	0.013379	0.01	0.001	1	Egln1	1.0757e-05	0.103982	0.437	0.331	0.21756	Nfib	2.39743e-05	0.142935	0.355	0.23	0.484881	Zfp444	0.00278416	-0.225982	0.848	0.916	1
E330013P04Rik	0.0351124	0.0557489	0.057	0.017	1	Ncstn	0.00340837	0.15715	0.228	0.107	1	Mcm3ap	0.0115881	0.175452	0.25	0.124	1	Grb2	7.80789e-07	0.305253	0.47	0.288	0.0149365	Fgfr2	0.0186596	0.013379	0.01	0.001	1	Tspan17	1.08302e-05	0.128293	0.249	0.176	0.219041	Cttn	2.40833e-05	0.126081	0.214	0.119	0.487085	Trafd1	0.00278706	-0.301278	0.384	0.507	1
Uck1	0.0352864	-0.148134	0.038	0.138	1	Vax2os	0.00341762	-0.651123	0.342	0.463	1	Ebpl	0.0116394	-0.184924	1	0.996	1	Ndufa13	7.91817e-07	-0.286551	0.94	0.978	0.0151475	Sigirr	0.0186596	0.013379	0.01	0.001	1	Fam135b	1.089e-05	0.096015	0.084	0.042	0.22025	1500004A13Rik	2.415e-05	0.0969345	0.107	0.045	0.488433	Zfas1	0.00279718	0.217471	0.446	0.29	1
Ifnar1	0.0352865	-0.151794	0.038	0.138	1	Atp5j	0.00344161	-0.214996	0.987	1	1	Gprin3	0.0116431	0.188234	0.188	0.083	1	Glce	7.97664e-07	0.16858	0.127	0.037	0.0152593	B830042I05Rik	0.0186596	0.013379	0.01	0.001	1	Laptm4b	1.10528e-05	-0.128377	0.957	0.972	0.223542	Nrp2	2.44501e-05	0.0931835	0.092	0.035	0.494504	Rab3b	0.00282007	0.12201	0.098	0.034	1
Ddi2	0.0354496	0.179115	0.472	0.335	1	Btc	0.0034424	0.154154	0.215	0.098	1	Ylpm1	0.0117123	-0.249718	0.125	0.294	1	Pnck	7.99804e-07	0.100836	0.078	0.015	0.0153003	Chrnb3	0.0186596	0.013379	0.01	0.001	1	Mrps7	1.11014e-05	0.101611	0.535	0.416	0.224526	Eif2b3	2.45106e-05	0.11838	0.195	0.105	0.495727	Ranbp1	0.00282359	0.238991	0.911	0.855	1
9330160F10Rik	0.0355366	0.100951	0.094	0.037	1	Parvb	0.00345492	0.230528	0.177	0.077	1	Tmem158	0.0117933	0.208133	0.333	0.182	1	Tiam1	8.00202e-07	0.0633791	0.042	0.003	0.0153079	G430095P16Rik	0.0186596	0.013379	0.01	0.001	1	Tubb6	1.11196e-05	0.0749074	0.054	0.022	0.224895	4632427E13Rik	2.46945e-05	-0.254609	0.374	0.502	0.499447	Atn1	0.00282375	0.265338	0.366	0.238	1
Dctn1	0.0355839	0.244868	0.981	0.874	1	Maged1	0.00348114	0.298362	0.671	0.547	1	Klhl23	0.0119983	0.228133	0.271	0.14	1	Sfxn1	8.03826e-07	0.0993509	0.078	0.015	0.0153772	Piezo1	0.0186596	0.013379	0.01	0.001	1	Clybl	1.13593e-05	0.11078	0.166	0.106	0.229741	Adrb1	2.5256e-05	0.143704	0.202	0.111	0.510803	Setdb2	0.00283676	-0.274594	0.223	0.367	1
Hist1h2ac	0.0356212	0.0516092	0.057	0.017	1	Araf	0.00348778	0.219422	0.608	0.446	1	Aff4	0.0120172	0.277722	0.833	0.657	1	1700016L21Rik	8.3355e-07	0.0535587	0.042	0.003	0.0159458	Scn2b	0.0186596	0.013379	0.01	0.001	1	Rnf20	1.16387e-05	0.115905	0.522	0.406	0.235393	Sephs2	2.54799e-05	0.122078	0.191	0.102	0.515331	Rps27l	0.00287071	0.187962	0.973	0.957	1
Lrrc42	0.0356634	0.157359	0.434	0.299	1	5033430I15Rik	0.00349178	0.178952	0.19	0.084	1	Aimp1	0.0120569	0.264658	0.854	0.672	1	Hnrnpf	8.467e-07	-0.272711	0.928	0.968	0.0161974	Gm39363	0.0186596	0.013379	0.01	0.001	1	Mocs2	1.18239e-05	0.105089	0.446	0.344	0.239138	Nrxn1	2.57243e-05	0.103641	0.118	0.052	0.520275	Adamts3	0.00291632	-0.175832	0.08	0.203	1
Tspyl4	0.0357298	-0.176971	0.17	0.305	1	Mpi	0.00353834	0.17032	0.19	0.084	1	Pnp	0.0120692	0.398442	0.562	0.411	1	Gm19938	8.5388e-07	0.0978674	0.078	0.015	0.0163347	1700065D16Rik	0.0186596	0.013379	0.01	0.001	1	Atxn7l3b	1.18496e-05	0.131047	0.999	0.999	0.239659	Myocd	2.57984e-05	0.0647072	0.073	0.024	0.521772	Bzw1	0.00298946	0.142326	0.92	0.848	1
Fubp3	0.0359199	0.129996	0.208	0.113	1	Trim8	0.00357925	0.208505	0.266	0.14	1	Becn1	0.0120901	0.246135	0.375	0.223	1	Hmgn2	8.63894e-07	-0.240494	0.982	1	0.0165263	Tafa2	0.0186596	0.013379	0.01	0.001	1	Klf6	1.2194e-05	0.165232	0.225	0.158	0.246623	Zscan21	2.58282e-05	0.120137	0.156	0.078	0.522376	Six3os1	0.00299228	0.143702	0.259	0.14	1
Snx9	0.0359534	0.1698	0.094	0.037	1	Tagln3	0.00358417	0.161562	0.19	0.084	1	Akap5	0.0121161	-0.232377	0.021	0.151	1	Med27	8.70846e-07	0.258542	0.331	0.171	0.0166593	Slc26a10	0.0186596	0.013379	0.01	0.001	1	Nudt3	1.22989e-05	-0.13428	0.733	0.79	0.248745	Mef2d	2.58439e-05	-0.25267	0.393	0.525	0.522693	Gpr180	0.00301748	-0.290599	0.464	0.581	1
mt-Co2	0.0359755	-0.136316	1	1	1	Polr3h	0.00362776	0.163711	0.304	0.164	1	Rpl26	0.0123378	0.185141	1	0.999	1	Prdx4	9.17554e-07	0.17313	0.211	0.085	0.0175528	Slfn9	0.0186596	0.013379	0.01	0.001	1	Rpl36al	1.23129e-05	0.118977	0.984	0.973	0.249028	Gdi1	2.59386e-05	0.16404	0.324	0.211	0.524608	Ybx1	0.00302228	0.176971	1	1	1
Vps37a	0.0360548	0.274945	0.717	0.613	1	Thoc5	0.00363367	-0.232165	0.101	0.25	1	Mpp4	0.0124224	-0.279286	0.625	0.769	1	Cgn	9.40164e-07	0.130164	0.102	0.025	0.0179853	Brip1	0.0186596	0.013379	0.01	0.001	1	Foxred2	1.23504e-05	-0.0765852	0.018	0.054	0.249787	Nop14	2.62536e-05	0.115138	0.172	0.088	0.530979	Srek1ip1	0.00303273	0.224844	0.554	0.389	1
Lmnb1	0.0361981	0.215388	0.566	0.426	1	Cdc42	0.0036519	0.231938	0.886	0.82	1	Dync1h1	0.0124556	-0.347564	0.542	0.704	1	Gabbr2	9.66549e-07	0.217956	0.151	0.05	0.0184901	Arl5c	0.0186596	0.013379	0.01	0.001	1	Nectin4	1.25394e-05	0.034634	0.014	0.001	0.253609	Sacs	2.66324e-05	0.107378	0.141	0.067	0.538641	Igsf21	0.00304798	0.313861	0.598	0.453	1
Dynlrb2	0.0362328	0.103911	0.208	0.11	1	Chaf1a	0.00365385	0.150677	0.127	0.044	1	Lix1l	0.0124558	0.0937429	0.125	0.044	1	Pip5k1b	9.72354e-07	0.117016	0.12	0.034	0.0186011	C630031E19Rik	0.0186596	0.013379	0.01	0.001	1	Ctbp2	1.28318e-05	-0.132275	0.92	0.935	0.259524	Rgs7	2.67394e-05	0.0875449	0.069	0.023	0.540805	Csn3	0.00304835	-0.408921	0.062	0.168	1
Gm10076	0.0363071	-0.165237	0.094	0.216	1	Peg13	0.00367046	0.332107	0.405	0.278	1	Got1	0.0125558	-0.34308	0.562	0.711	1	Nfasc	9.84162e-07	-0.298967	0.114	0.302	0.018827	Hist1h2af	0.0186596	0.013379	0.01	0.001	1	Stx3	1.289e-05	-0.123897	0.99	0.994	0.260701	Slc4a2	2.75933e-05	0.101495	0.13	0.06	0.558074	Yars	0.00304968	0.394548	0.277	0.174	1
Rab3ip	0.0363485	-0.169732	0.094	0.216	1	Ankrd33b	0.00367739	-0.325338	0.734	0.832	1	Igsf9	0.0125938	-0.236719	0.167	0.353	1	Phf3	1.00529e-06	0.371474	0.777	0.643	0.0192313	Gm47076	0.0186596	0.013379	0.01	0.001	1	Lmo2	1.33072e-05	0.139309	0.239	0.169	0.269139	Psap	2.80775e-05	0.178054	0.492	0.358	0.567868	2610020C07Rik	0.00305137	-0.225761	0.152	0.283	1
Sh3glb1	0.036445	-0.197076	0.642	0.714	1	Cwf19l2	0.00372711	0.295737	0.582	0.418	1	Cnih1	0.0126371	-0.286864	0.208	0.372	1	Plk5	1.03042e-06	-0.356764	0.102	0.279	0.0197119	Sv2c	0.0186596	0.013379	0.01	0.001	1	Slc1a4	1.34246e-05	0.11553	0.088	0.046	0.271512	Gjc1	2.82265e-05	0.076364	0.061	0.019	0.57088	Lsm3	0.00305401	0.138621	0.402	0.251	1
AA465934	0.0364462	0.118057	0.151	0.073	1	Krit1	0.00373443	0.230528	0.544	0.367	1	Eif2ak3	0.012678	0.190765	0.167	0.069	1	Smim14	1.06686e-06	0.30497	0.416	0.251	0.020409	Shisal2b	0.0186596	0.013379	0.01	0.001	1	Srpk2	1.3433e-05	-0.143558	0.913	0.923	0.271682	Jmjd1c	2.83416e-05	-0.254176	0.416	0.536	0.573209	Ppp1r1b	0.00306354	0.167019	0.062	0.016	1
Orc5	0.0366789	0.0675309	0.075	0.026	1	Elk4	0.00373536	0.137407	0.177	0.075	1	Mettl21a	0.0126997	0.152425	0.208	0.096	1	Cks1b	1.11428e-06	0.152513	0.175	0.063	0.0213162	Ap1g2	0.0186596	0.013379	0.01	0.001	1	Pak1ip1	1.3684e-05	0.0997817	0.586	0.473	0.276758	Ppfia2	2.88954e-05	-0.250368	0.294	0.417	0.584409	Pgap1	0.00307905	-0.208376	0.036	0.134	1
Nme2	0.0366927	0.207658	0.66	0.53	1	Crb1	0.0037559	-0.191131	0.203	0.376	1	Tnfsf12	0.0127744	-0.27219	0.438	0.62	1	Ercc3	1.15152e-06	-0.370756	0.289	0.483	0.0220287	Bin2	0.0186596	0.013379	0.01	0.001	1	Rpl30	1.38767e-05	0.102648	1	1	0.280656	Rtl6	2.8944e-05	0.0899396	0.122	0.054	0.585393	Atxn2l	0.00314367	0.316766	0.589	0.462	1
Thg1l	0.0367563	0.107648	0.189	0.098	1	Kcne2	0.0037777	0.224091	0.076	0.019	1	Hist3h2a	0.0128937	0.144395	0.146	0.057	1	Atat1	1.17091e-06	0.1558	0.151	0.05	0.0223994	Galnt6	0.0186596	0.013379	0.01	0.001	1	Psmb6	1.4176e-05	0.100491	0.973	0.951	0.286709	Ptpn1	2.91758e-05	0.175482	0.256	0.157	0.590081	Ccdc90b	0.00314682	0.251475	0.384	0.247	1
C1ql3	0.036884	-0.264926	0.113	0.232	1	Crtac1	0.00380228	0.226182	0.291	0.159	1	Rasa4	0.0131467	0.183096	0.146	0.058	1	Stx3	1.17158e-06	-0.31179	0.886	0.952	0.0224124	Klhl6	0.0186596	0.013379	0.01	0.001	1	Rpl35	1.41781e-05	0.114224	0.995	0.993	0.286752	Tnfsf12	3.11333e-05	-0.196004	0.145	0.261	0.62967	Rpl22l1	0.00316376	0.24346	0.991	0.959	1
Tmod3	0.0370142	0.201159	0.415	0.279	1	Ago4	0.00382078	0.122114	0.139	0.051	1	Sar1b	0.013191	0.2653	0.812	0.653	1	Rcan1	1.17228e-06	0.222853	0.217	0.091	0.0224257	Gm26569	0.0186596	0.013379	0.01	0.001	1	Armc9	1.42358e-05	-0.152033	0.377	0.459	0.287918	Mpnd	3.13174e-05	0.123028	0.218	0.123	0.633395	Cars2	0.00316876	-0.194823	0.062	0.174	1
Selenow	0.037042	0.17586	1	0.978	1	Prkra	0.00382277	0.1848	0.291	0.157	1	Zc3h13	0.0132894	-0.323821	0.396	0.596	1	Dnaja1	1.18054e-06	0.329087	0.922	0.866	0.0225838	Gm49579	0.0186596	0.013379	0.01	0.001	1	Rnf165	1.43497e-05	0.11525	0.414	0.32	0.290223	Golga2	3.13672e-05	0.140197	0.179	0.096	0.634402	Slc9a3r1	0.0031737	0.129139	0.08	0.025	1
Prmt5	0.0371645	-0.154079	0.057	0.167	1	Ppp1r26	0.00382881	0.128497	0.127	0.044	1	Pcmt1	0.0133963	0.202276	0.625	0.429	1	Hyal1	1.24557e-06	0.187962	0.151	0.051	0.0238278	Psmb9	0.0186596	0.013379	0.01	0.001	1	Mrps25	1.45919e-05	0.125598	0.512	0.395	0.295121	Dhcr24	3.31119e-05	0.060672	0.057	0.017	0.669688	Dusp22	0.00317647	-0.324897	0.277	0.407	1
Cab39l	0.0375608	0.222274	0.491	0.369	1	Hnrnph3	0.00383599	0.245041	0.506	0.35	1	Rps11	0.013463	0.171928	1	1	1	Myo6	1.25311e-06	0.250877	0.325	0.172	0.0239721	Rftn1	0.0186596	0.013379	0.01	0.001	1	Slc35c2	1.52575e-05	0.118318	0.198	0.132	0.308584	Cacnb2	3.35516e-05	-0.178087	0.111	0.221	0.678581	Irf2bp2	0.00318146	0.257123	0.571	0.425	1
Rybp	0.0377071	0.132254	0.377	0.244	1	Lrrc2	0.00385011	0.147467	0.114	0.037	1	Lyrm2	0.0134894	0.163237	0.458	0.277	1	Sys1	1.25519e-06	0.346075	0.976	0.928	0.0240118	Rasgrp3	0.0186596	0.013379	0.01	0.001	1	Krt18	1.53941e-05	0.267009	0.166	0.109	0.311346	C230037L18Rik	3.35874e-05	0.0358937	0.031	0.005	0.679304	Ndufa6	0.00318478	0.208871	0.982	0.966	1
Slc6a9	0.0379564	0.220125	0.415	0.289	1	C730034F03Rik	0.00385072	0.0926283	0.203	0.091	1	Gm17018	0.0136276	-0.296844	0.208	0.387	1	Hist3h2a	1.28512e-06	0.129511	0.145	0.046	0.0245844	Gm19689	0.0186596	0.013379	0.01	0.001	1	Tnnc1	1.59871e-05	0.0878316	0.077	0.037	0.32334	Lgals1	3.36965e-05	0.0872304	0.088	0.034	0.681513	Dnajc2	0.00318939	0.0623451	0.455	0.278	1
Taf6l	0.0379877	0.111316	0.226	0.126	1	Bex4	0.00388333	0.136952	0.203	0.091	1	Dnajc16	0.0136509	-0.171339	0	0.113	1	Rab28	1.35372e-06	-0.347253	0.542	0.703	0.0258967	Kcnk12	0.0186596	0.013379	0.01	0.001	1	Rps20	1.60123e-05	0.113797	1	1	0.323849	Bex1	3.49937e-05	0.147775	0.24	0.142	0.707747	Eif4ebp2	0.00319228	0.208585	0.438	0.28	1
Csnk1g3	0.0380271	0.201429	0.472	0.335	1	Ntm	0.00390299	0.360242	0.684	0.568	1	Synrg	0.0136964	-0.270215	0.521	0.678	1	Tprn	1.37061e-06	0.122008	0.096	0.023	0.0262198	2700046A07Rik	0.0186596	0.013379	0.01	0.001	1	Leng8	1.6314e-05	-0.130774	0.911	0.925	0.32995	Cbl	3.52005e-05	0.123144	0.218	0.123	0.71193	Cd63	0.00322742	0.360934	0.964	0.952	1
Atr	0.03822	-0.166342	0.038	0.135	1	Magi3	0.00390659	0.115758	0.152	0.058	1	Pop1	0.0137879	0.107023	0.083	0.024	1	Gprasp2	1.42786e-06	0.141237	0.151	0.05	0.027315	4930549G23Rik	0.0186596	0.013379	0.01	0.001	1	Arl14ep	1.63632e-05	0.141218	0.284	0.208	0.330947	Cox6c	3.55304e-05	-0.202037	0.985	0.997	0.718602	Tnrc18	0.00327648	0.265541	0.268	0.152	1
Vps37d	0.0384381	0.0735851	0.094	0.037	1	Ccdc126	0.00392967	-0.313706	0.696	0.787	1	1110008P14Rik	0.0138286	-0.318752	0.396	0.54	1	Ncor2	1.45291e-06	0.337645	0.47	0.309	0.0277941	Acy3	0.0186596	0.013379	0.01	0.001	1	Kcnd3	1.63792e-05	0.114754	0.111	0.063	0.33127	Uhrf1	3.56825e-05	0.0301622	0.019	0.002	0.721678	Pgm1	0.00328818	-0.320035	0.286	0.414	1
Hikeshi	0.0384393	0.151494	0.491	0.339	1	2025-03-01	0.00393949	-0.278847	0.684	0.811	1	Cers4	0.0138413	-0.363446	0.188	0.364	1	Ttc32	1.49492e-06	0.149278	0.12	0.035	0.0285979	Ahnak	0.0186596	0.013379	0.01	0.001	1	Gm11342	1.71462e-05	-0.112549	0.052	0.101	0.346782	Rimbp2	3.60115e-05	0.040055	0.019	0.002	0.728332	Anp32e	0.00329806	-0.182921	1	0.996	1
Zcchc3	0.0385577	-0.188678	0.094	0.212	1	Fmn1	0.0039548	0.0894668	0.101	0.03	1	Cfap20	0.0138494	0.295017	0.792	0.614	1	Gpr180	1.49627e-06	-0.310495	0.524	0.706	0.0286236	Gm26644	0.0186596	0.013379	0.01	0.001	1	Smndc1	1.73649e-05	0.107624	0.532	0.416	0.351205	Rangap1	3.61586e-05	0.154899	0.321	0.211	0.731307	Ptprf	0.00330119	0.191021	0.134	0.057	1
Slc35e3	0.0387544	0.0722349	0.094	0.037	1	Eps8	0.00396178	0.150677	0.114	0.037	1	Zc3h4	0.0139196	-0.25864	0.062	0.206	1	Map1b	1.49719e-06	0.23497	0.994	0.998	0.0286413	Calhm2	0.0186596	0.013379	0.01	0.001	1	Ciart	1.75364e-05	0.0714653	0.041	0.014	0.354673	Add2	3.64329e-05	0.0682039	0.073	0.025	0.736856	Anxa2	0.00335766	0.113616	0.062	0.016	1
Tulp1	0.0390292	-0.137265	1	0.998	1	Tmem17	0.00400828	0.1317	0.127	0.044	1	Zfp101	0.0139612	0.117553	0.188	0.082	1	Serping1	1.50198e-06	0.0648859	0.036	0.002	0.0287329	Lpar4	0.0186596	0.013379	0.01	0.001	1	Tpt1	1.75902e-05	0.0833121	1	1	0.355762	Tubb3	3.70379e-05	0.191286	0.332	0.222	0.749091	B230354K17Rik	0.00338711	0.19437	0.179	0.088	1
Zfp467	0.0390727	0.0695382	0.094	0.037	1	Tmem26	0.0040099	0.234869	0.241	0.124	1	Ublcp1	0.0141008	-0.235219	0.125	0.295	1	Mir100hg	1.50198e-06	0.0648859	0.036	0.002	0.0287329	4930439D14Rik	0.0186596	0.013379	0.01	0.001	1	Trio	1.76898e-05	0.143602	0.233	0.165	0.357775	Spidr	3.73675e-05	0.0628261	0.065	0.021	0.755759	Rsrc2	0.00339738	-0.219632	0.991	0.998	1
Nap1l4	0.0393167	0.224566	0.585	0.452	1	Ift22	0.0040278	-0.308099	0.304	0.456	1	Rab40c	0.014242	-0.168105	0	0.112	1	Zic3	1.50198e-06	0.0648859	0.036	0.002	0.0287329	Pde1a	0.0186596	0.0266147	0.01	0.001	1	6720427I07Rik	1.77994e-05	-0.200303	0.255	0.329	0.359992	Son	3.74574e-05	-0.186776	0.966	0.983	0.757577	Slc12a6	0.00341832	-0.35052	0.411	0.513	1
Lzts2	0.0393877	0.11821	0.264	0.154	1	Nme1	0.0040475	0.247684	0.835	0.692	1	BC034090	0.0143298	-0.2891	0.208	0.375	1	Ppargc1b	1.50448e-06	-0.27583	0.036	0.184	0.0287806	Mroh8	0.0186596	0.013379	0.01	0.001	1	Gm42738	1.80183e-05	0.0636808	0.041	0.014	0.364421	Anp32b	3.84432e-05	0.141296	0.473	0.337	0.777514	mt-Co2	0.00343631	0.152145	1	1	1
Nae1	0.0395303	-0.228744	0.321	0.463	1	Eif3a	0.00405752	0.30087	0.671	0.537	1	Slc12a6	0.0143662	-0.337877	0.333	0.488	1	Rassf4	1.51536e-06	0.0565706	0.036	0.002	0.0289888	Gm11008	0.0186596	0.013379	0.01	0.001	1	Rps28	1.80195e-05	0.113388	1	1	0.364444	Trim32	3.8574e-05	0.098434	0.16	0.081	0.78016	Ing1	0.00344245	0.226464	0.491	0.344	1
Klhdc8b	0.0395448	-0.249133	0.245	0.369	1	Nrxn3	0.0040648	0.549876	0.203	0.098	1	Hmgcs1	0.0144144	0.185472	0.417	0.255	1	Ikzf4	1.52882e-06	0.0482071	0.036	0.002	0.0292463	1110002E22Rik	0.0186596	0.013379	0.01	0.001	1	Gng5	1.8217e-05	0.153361	0.952	0.957	0.36844	Tsc22d1	3.86182e-05	0.177895	0.427	0.306	0.781053	Rpsa	0.00344671	0.199423	1	0.998	1
B230312C02Rik	0.0395972	0.0923817	0.038	0.009	1	Acin1	0.00410526	0.284212	0.823	0.708	1	Os9	0.0145176	-0.21026	0.188	0.382	1	Lhx1os	1.52882e-06	0.0482071	0.036	0.002	0.0292463	Zfp534	0.0186596	0.013379	0.01	0.001	1	Mrps28	1.84436e-05	0.108918	0.617	0.499	0.373022	Slco3a1	3.88897e-05	0.068081	0.046	0.012	0.786543	Zdhhc16	0.00345729	-0.23656	0.196	0.333	1
Rexo5	0.0395972	0.0668466	0.038	0.009	1	Glmn	0.00410745	-0.326552	0.43	0.57	1	St6galnac4	0.0145184	0.139324	0.167	0.071	1	Lrmda	1.52882e-06	0.0482071	0.036	0.002	0.0292463	4933425D22Rik	0.0186596	0.013379	0.01	0.001	1	Trappc3	1.85002e-05	0.105345	0.464	0.361	0.374166	Hcn2	3.89606e-05	0.0452022	0.042	0.01	0.787978	Tomm70a	0.00351763	0.253926	0.527	0.362	1
H3f3b	0.0396059	0.115719	1	1	1	Alpl	0.00410965	-0.188753	0.013	0.119	1	Ppcs	0.014598	0.0795427	0.083	0.024	1	Ptprm	1.52882e-06	0.0482071	0.036	0.002	0.0292463	Akr1b8	0.0186596	0.013379	0.01	0.001	1	Fbxo22	1.85288e-05	0.127995	0.306	0.228	0.374745	Synm	3.91289e-05	0.0785967	0.076	0.027	0.791382	Lrit2	0.00352002	-0.198775	0.188	0.333	1
Zdhhc2	0.0396708	-0.209127	0.623	0.748	1	Zfp148	0.00411863	0.245041	0.595	0.418	1	Tpm3-rs7	0.014598	0.0795427	0.083	0.024	1	Gm29183	1.56879e-06	0.0343515	0.024	0	0.0300109	Mrap2	0.0186596	0.013379	0.01	0.001	1	Slc24a3	1.86191e-05	0.0832197	0.139	0.084	0.376572	Chst8	3.92888e-05	0.0584899	0.046	0.012	0.794615	Man1a2	0.00352092	0.272143	0.411	0.272	1
Stk16	0.0397583	0.172373	0.434	0.304	1	Dennd5b	0.00412898	0.262048	0.253	0.131	1	St5	0.0147756	0.0777693	0.083	0.024	1	Gm14317	1.56879e-06	0.0343515	0.024	0	0.0300109	Ctnna3	0.0186596	0.013379	0.01	0.001	1	Dennd2a	1.88302e-05	0.163309	0.285	0.214	0.380841	Dact1	3.93203e-05	0.0560146	0.05	0.013	0.795252	Rbbp7	0.00352442	0.196401	0.536	0.375	1
Nos3	0.0398479	0.0654548	0.038	0.009	1	Thrb	0.00415663	-0.318757	0.241	0.39	1	Tma7	0.0148444	0.138438	1	1	1	Notch2	1.56879e-06	0.0343515	0.024	0	0.0300109	Vpreb3	0.0186596	0.013379	0.01	0.001	1	Lgi2	1.88314e-05	0.051014	0.041	0.014	0.380865	Snx9	3.95381e-05	0.0716843	0.076	0.027	0.799659	Ttc14	0.00352492	-0.248167	0.946	0.966	1
Rpf2	0.0399272	0.201574	0.434	0.308	1	Pgrmc1	0.00417374	0.271741	0.354	0.222	1	Fdxr	0.0148501	0.122836	0.208	0.096	1	Gm30524	1.56879e-06	0.0343515	0.024	0	0.0300109	2210039B01Rik	0.0186596	0.013379	0.01	0.001	1	Arl2bp	1.90042e-05	0.0975232	0.459	0.351	0.38436	Cacnb4	3.98357e-05	0.0576644	0.046	0.012	0.805678	Irf3	0.00352636	-0.262843	0.152	0.278	1
Sec61a1	0.0399731	0.187721	0.34	0.224	1	Tnk2	0.00418076	0.125198	0.165	0.068	1	Epb41	0.0148969	-0.229804	0.979	0.985	1	Gabra1	1.56879e-06	0.0343515	0.024	0	0.0300109	Gm30948	0.0186596	0.013379	0.01	0.001	1	Gm26917	1.93124e-05	1.6088	0.402	0.335	0.390593	Ywhab	4.02692e-05	0.234053	0.656	0.557	0.814444	Ube2r2	0.00352696	0.164508	0.866	0.778	1
Itm2b	0.0401098	0.184008	0.981	0.864	1	Dnajc3	0.00418141	0.294728	0.405	0.259	1	Immp1l	0.0149011	-0.206021	0.479	0.675	1	Olfm4	1.56879e-06	0.0343515	0.024	0	0.0300109	A930038B10Rik	0.0186596	0.013379	0.01	0.001	1	Tmcc1	1.95564e-05	-0.14621	0.718	0.769	0.395527	Csgalnact1	4.05744e-05	0.0427226	0.042	0.01	0.820617	Ubald2	0.00353965	0.23131	0.696	0.561	1
Churc1	0.0404327	-0.199992	0.094	0.206	1	Dusp8	0.00420595	0.385752	0.747	0.643	1	Arl6	0.0151567	-0.338675	0.646	0.744	1	6030407O03Rik	1.56883e-06	0.0428131	0.024	0	0.0300118	Fitm1	0.0186596	0.013379	0.01	0.001	1	Cdh20	1.99839e-05	0.081132	0.111	0.063	0.404175	Ampd2	4.10764e-05	0.115701	0.115	0.051	0.83077	Eif2ak3	0.00354017	0.329942	0.214	0.118	1
Ralgds	0.0407217	0.145116	0.189	0.102	1	Hsd17b7	0.00422342	0.112445	0.076	0.019	1	Edf1	0.0153391	0.242261	0.917	0.879	1	Fezf2	1.56883e-06	0.0595888	0.024	0	0.0300118	Dnajb7	0.0186596	0.013379	0.01	0.001	1	Mier1	2.03287e-05	-0.136852	0.83	0.849	0.411148	Ppp4r1	4.18995e-05	0.116155	0.149	0.074	0.847417	Cstb	0.0035413	0.34931	0.714	0.615	1
Serpine2	0.0407318	0.0408514	0.038	0.009	1	Rhobtb1	0.00426484	0.0996385	0.114	0.037	1	Hmgcl	0.0154112	0.211638	0.167	0.074	1	Slc16a8	1.56883e-06	0.0595888	0.024	0	0.0300118	Gm35576	0.0186596	0.013379	0.01	0.001	1	Eef1g	2.05215e-05	0.119566	0.928	0.917	0.415047	Ahr	4.20266e-05	-0.202049	0.145	0.262	0.849987	Sox11	0.00355267	0.428637	0.643	0.534	1
Gm12971	0.0407318	0.0408514	0.038	0.009	1	Baiap2	0.00430657	0.0996385	0.127	0.044	1	Mir124a-1hg	0.0154598	-0.306683	0.917	0.943	1	Saa1	1.56885e-06	0.0512253	0.024	0	0.0300121	Acnat1	0.0186596	0.013379	0.01	0.001	1	Me3	2.05541e-05	0.0444238	0.039	0.013	0.415707	Arhgef11	4.27173e-05	0.166126	0.298	0.189	0.863957	Vamp2	0.00356109	-0.232181	0.911	0.934	1
Gm17207	0.0407318	0.0408514	0.038	0.009	1	Als2	0.00431023	0.131355	0.165	0.068	1	Ppp2r5d	0.0155633	-0.248233	0.083	0.235	1	Rplp0	1.63758e-06	0.312674	0.976	0.982	0.0313269	Mfsd13b	0.0186596	0.013379	0.01	0.001	1	Rps27l	2.09269e-05	0.103541	0.959	0.951	0.423246	Prkg2	4.35333e-05	0.0420585	0.027	0.004	0.880461	Gas1	0.00356417	0.23173	0.107	0.041	1
Ttc41	0.0407318	0.0408514	0.038	0.009	1	Lrpprc	0.00436856	-0.243323	0.127	0.278	1	Adrm1	0.0158587	-0.243723	0.167	0.333	1	Trp53bp2	1.64606e-06	0.340006	0.325	0.178	0.0314891	Gm16248	0.0186596	0.013379	0.01	0.001	1	Slc25a33	2.0973e-05	-0.134203	0.948	0.96	0.424178	Tph1	4.35333e-05	0.0473723	0.027	0.004	0.880461	AI847159	0.00357305	-0.346747	0.625	0.676	1
Myadml2	0.0407318	0.0408514	0.038	0.009	1	Psmg3	0.00437683	0.136732	0.215	0.1	1	Aamdc	0.0159011	0.18483	0.417	0.259	1	Rap1gap2	1.65848e-06	0.20787	0.211	0.088	0.0317267	Twist1	0.0186596	0.013379	0.01	0.001	1	Cited4	2.11787e-05	0.0509652	0.037	0.012	0.428339	Kdm4c	4.39212e-05	-0.220166	0.187	0.301	0.888307	Ccdc88c	0.00357885	0.0893559	0.08	0.025	1
Glyctk	0.0409887	0.038069	0.038	0.009	1	Sacs	0.00438009	0.1961	0.139	0.054	1	Tuba1a	0.016	-0.27709	0.917	0.975	1	Prkra	1.71476e-06	0.2277	0.313	0.16	0.0328033	Epb42	0.0186596	0.013379	0.01	0.001	1	Dipk2a	2.12158e-05	0.12712	0.146	0.092	0.42909	Mcub	4.41344e-05	0.0313718	0.027	0.004	0.892618	Zup1	0.0035927	-0.259458	0.161	0.289	1
Ipo8	0.0415041	0.173595	0.283	0.172	1	Tfap2b	0.00438199	0.0788928	0.076	0.019	1	Ttc8	0.0161541	-0.215107	0.375	0.574	1	Auts2	1.72028e-06	0.265209	0.247	0.114	0.0329089	Mos	0.0186596	0.013379	0.01	0.001	1	Anapc5	2.12898e-05	0.0886255	0.388	0.288	0.430587	Fam181b	4.41344e-05	0.0313718	0.027	0.004	0.892618	Tiam1	0.00360021	0.100156	0.08	0.025	1
5730409E04Rik	0.0415062	0.0339054	0.038	0.009	1	Vegfa	0.00438395	0.361543	0.443	0.304	1	3110021N24Rik	0.0161758	0.0657949	0.062	0.015	1	Sestd1	1.72904e-06	0.127332	0.139	0.044	0.0330766	Nup214	0.0186727	-0.168785	0.152	0.26	1	Bax	2.1456e-05	0.130024	0.9	0.856	0.433948	Zmat3	4.46131e-05	0.103958	0.134	0.064	0.902299	Dnaic1	0.00360882	0.18778	0.134	0.057	1
Nmral1	0.041518	0.103614	0.057	0.018	1	Zfp786	0.00450627	0.0755877	0.076	0.019	1	Map3k14	0.0161758	0.0657949	0.062	0.015	1	Ryk	1.83231e-06	0.266199	0.349	0.193	0.0350521	Cd38	0.0187593	0.0111406	0.01	0.001	1	Rplp2	2.17077e-05	0.108683	1	1	0.439038	Celf6	4.47401e-05	0.0582107	0.061	0.019	0.904868	Rpl37	0.00362881	0.22209	1	1	1
Dusp8	0.0415436	0.214986	0.698	0.554	1	Dpf1	0.00450627	0.0755877	0.076	0.019	1	Pkd1	0.0161794	-0.212304	0.042	0.174	1	Pitpnc1	1.88193e-06	0.38107	0.59	0.423	0.0360014	Wdr95	0.0187593	0.0122594	0.01	0.001	1	Gm26797	2.17445e-05	0.0449626	0.026	0.006	0.439783	Frmd6	4.52641e-05	0.0847001	0.107	0.046	0.915466	Stau1	0.00364707	-0.190001	0.125	0.258	1
Mrps22	0.0418145	0.150975	0.321	0.204	1	Cldn23	0.00450627	0.0755877	0.076	0.019	1	Otud7b	0.0162322	-0.370537	0.583	0.709	1	Tomm7	1.90637e-06	-0.248186	0.976	0.992	0.0364689	Chrm2	0.0187593	0.0122594	0.01	0.001	1	Dusp1	2.19439e-05	0.117694	0.11	0.063	0.443816	Tmod2	4.54537e-05	0.137895	0.198	0.111	0.919302	Tpst2	0.00368352	0.114137	0.089	0.03	1
Asnsd1	0.0419276	0.192983	0.396	0.271	1	Abcd2	0.00450627	0.0755877	0.076	0.019	1	Ovca2	0.0163549	0.0640039	0.062	0.015	1	Wee1	1.90717e-06	0.0588684	0.048	0.005	0.0364842	Fam187b	0.0187593	0.0122594	0.01	0.001	1	Map3k12	2.2054e-05	-0.190042	0.392	0.463	0.446043	Hs3st3b1	4.55224e-05	-0.162095	0.118	0.23	0.920691	1110059G10Rik	0.00369368	-0.264899	0.188	0.323	1
Adrb1	0.0420631	0.143205	0.604	0.428	1	Zfand5	0.00452578	0.319465	0.684	0.584	1	Adcy2	0.0163549	0.0640039	0.062	0.015	1	Nxph3	1.90717e-06	0.0588684	0.048	0.005	0.0364842	1700128E19Rik	0.0187593	0.0122594	0.01	0.001	1	Tmem14c	2.21652e-05	0.0791839	0.36	0.266	0.448291	Gm43154	4.66689e-05	0.0392217	0.023	0.003	0.943879	Sinhcaf	0.00369417	0.176394	0.125	0.052	1
Rab3b	0.0424736	0.0871571	0.075	0.027	1	Nt5e	0.00456435	-0.221743	0.342	0.528	1	Rp1	0.0165151	-0.226589	1	0.997	1	Gng2	1.92079e-06	0.0790337	0.048	0.005	0.0367448	Clec18a	0.0187593	0.0122594	0.01	0.001	1	Tmem185a	2.22372e-05	-0.155891	0.276	0.351	0.449748	Pld1	4.71204e-05	0.0338685	0.023	0.003	0.95301	Sox4	0.00370308	0.306173	0.866	0.83	1
Tmem136	0.0428631	0.175749	0.245	0.15	1	Gm17092	0.00463357	0.0722901	0.076	0.019	1	Dhfr	0.0165543	0.134181	0.146	0.059	1	Dnajc9	1.96779e-06	0.272721	0.361	0.199	0.0376437	Gm36120	0.0187593	0.0100226	0.01	0.001	1	Riiad1	2.28566e-05	0.118069	0.228	0.159	0.462275	Nuggc	4.71204e-05	0.0338685	0.023	0.003	0.95301	Anp32b	0.00370449	0.207619	0.938	0.878	1
Zmat5	0.0428682	0.107377	0.472	0.307	1	Tsen2	0.00464294	0.12191	0.19	0.084	1	Gm47283	0.0165676	0.2354	0.75	0.598	1	Nemp2	1.99951e-06	0.1039	0.102	0.026	0.0382506	Gm36756	0.0187593	0.0122594	0.01	0.001	1	Gmds	2.31481e-05	0.0803502	0.104	0.058	0.468169	Vma21	4.72339e-05	0.125098	0.267	0.163	0.955305	Gucd1	0.00372303	-0.16866	0.134	0.267	1
Dhrs7	0.042988	-0.195975	0.113	0.235	1	Ubxn1	0.00464928	-0.276933	0.861	0.914	1	Brip1os	0.0166193	0.120215	0.125	0.047	1	Rbx1	2.02413e-06	-0.26455	0.988	0.991	0.0387215	4930594M22Rik.1	0.0187593	0.0122594	0.01	0.001	1	Rab28	2.32588e-05	-0.144842	0.734	0.765	0.470409	Oaz1	4.7509e-05	-0.177951	0.985	0.991	0.960869	Tmem115	0.00376745	0.241478	0.223	0.124	1
Proser2	0.0430163	0.157514	0.208	0.118	1	Spry2	0.00465496	-0.287964	0.165	0.318	1	Ift81	0.0166521	-0.249241	0.25	0.433	1	Ccdc141	2.03479e-06	0.196659	0.139	0.045	0.0389254	Gm6569	0.0187593	0.0122594	0.01	0.001	1	Rasa3	2.44326e-05	0.075455	0.087	0.045	0.494149	Crnde	4.75777e-05	0.038389	0.023	0.003	0.96226	Zfp654	0.00380452	-0.313914	0.348	0.471	1
D330041H03Rik	0.043077	-0.109522	0	0.072	1	Rap2a	0.00467958	0.167234	0.177	0.077	1	Ubxn1	0.0167613	0.278937	0.917	0.912	1	Dipk2a	2.04383e-06	0.1558	0.145	0.048	0.0390985	Gm36738	0.0187593	0.0122594	0.01	0.001	1	Grcc10	2.45997e-05	0.106981	0.995	0.995	0.497529	Usp42	4.7703e-05	0.0867573	0.095	0.039	0.964792	Cers4	0.00381137	-0.371399	0.446	0.545	1
Rfng	0.0431683	0.121022	0.226	0.129	1	Apbb2	0.00469043	0.12444	0.253	0.126	1	Mrpl35	0.0169889	0.179153	0.417	0.251	1	Nrxn3	2.05973e-06	0.24156	0.211	0.088	0.0394027	Pced1b	0.0187593	0.0122594	0.01	0.001	1	Rpl7	2.49438e-05	0.0998595	0.999	1	0.504488	Otud7b	4.80585e-05	-0.257232	0.374	0.488	0.971984	Traf3ip2	0.0038604	0.100299	0.054	0.013	1
Cdk11b	0.0431722	0.168341	0.679	0.549	1	Ubtf	0.00471319	0.232572	0.646	0.477	1	Mpv17l	0.0169898	0.13247	0.146	0.059	1	Crtac1	2.08221e-06	0.274625	0.343	0.185	0.0398327	Gm49733	0.0187593	0.0122594	0.01	0.001	1	Hist1h1e	2.50418e-05	-0.120024	0.811	0.843	0.50647	Gpx4	4.88248e-05	-0.165728	0.981	0.992	0.987481	Rps18	0.00386669	0.187787	1	0.993	1
5730414N17Rik	0.0432446	0.0785229	0.057	0.018	1	Tbrg1	0.0047213	-0.211204	0.203	0.367	1	Hdac11	0.017103	0.170575	0.104	0.037	1	Anapc5	2.14068e-06	0.280206	0.404	0.239	0.0409513	4930444A19Rik	0.0187593	0.0122594	0.01	0.001	1	Nfil3	2.5209e-05	0.143727	0.139	0.088	0.509852	Pafah1b3	4.91915e-05	0.190115	0.344	0.235	0.994899	Rpl8	0.0038687	0.155234	1	1	1
Prkca	0.043645	0.192884	0.434	0.308	1	Plekhb1	0.00473408	-0.289271	0.861	0.958	1	Amn1	0.0171078	0.255382	0.292	0.166	1	Nasp	2.14594e-06	0.228862	0.482	0.288	0.0410519	Gm31545	0.0187593	0.0122594	0.01	0.001	1	Kctd8	2.55709e-05	0.0922936	0.137	0.083	0.517171	Tmem176a	4.95845e-05	0.362019	0.595	0.483	1	Mpped1	0.00388839	0.0675525	0.036	0.005	1
Cplx2	0.0438334	0.188837	0.887	0.859	1	Rnf144b	0.00473567	0.128358	0.152	0.061	1	Kif23	0.0172166	0.104603	0.042	0.008	1	Ap2a2	2.16516e-06	-0.381539	0.675	0.77	0.0414195	Ttll2	0.0187593	0.0122594	0.01	0.001	1	Ythdf2	2.56698e-05	0.0729297	0.468	0.355	0.519172	Fnbp1l	4.97202e-05	0.128856	0.179	0.097	1	Prkab1	0.00388969	-0.25741	0.321	0.453	1
Ocrl	0.0438626	-0.161488	0.075	0.186	1	Frmd6	0.00474337	0.134495	0.152	0.061	1	Prdx2	0.017311	0.197717	0.958	0.914	1	Sel1l3	2.17575e-06	0.0497154	0.03	0.001	0.0416221	Gm49289	0.0187593	0.0122594	0.01	0.001	1	St6galnac3	2.57745e-05	0.0422568	0.045	0.017	0.521289	Syt1	4.98248e-05	-0.253045	0.695	0.739	1	2025-03-02	0.00391044	-0.244678	0.152	0.276	1
Laptm4b	0.0438846	0.217715	0.868	0.845	1	Dnajc21	0.00475008	0.172041	0.367	0.213	1	Klhl9	0.0173465	-0.263641	0.188	0.361	1	2025-03-04	2.1867e-06	0.0413032	0.03	0.001	0.0418316	Pwp2	0.0188809	0.0903862	0.131	0.068	1	Plk5	2.6069e-05	-0.101121	0.103	0.164	0.527245	Paqr9	4.99524e-05	0.0724973	0.073	0.025	1	Gramd1b	0.0039261	-0.263071	0.321	0.471	1
Sbds	0.0439666	0.162177	0.434	0.29	1	Zmynd11	0.00476312	0.27192	0.696	0.561	1	Gulp1	0.0175075	0.176318	0.5	0.327	1	Arhgef39	2.1867e-06	0.0413032	0.03	0.001	0.0418316	Foxn3	0.0189538	0.323585	0.495	0.417	1	Meis1	2.65335e-05	-0.175961	0.566	0.604	0.53664	Hsd17b7	5.01779e-05	0.0690178	0.073	0.025	1	Cox6a2	0.00392628	0.191003	0.036	0.005	1
Picalm	0.0440836	-0.219002	0.208	0.331	1	Adh5	0.00478285	0.201452	0.671	0.509	1	Rnf115	0.0176258	-0.217075	0.167	0.344	1	Hhipl1	2.1867e-06	0.0413032	0.03	0.001	0.0418316	AU041133	0.0189693	-0.155725	0.222	0.348	1	Eif5	2.65714e-05	0.121137	0.945	0.933	0.537406	Phf20	5.02432e-05	0.16197	0.313	0.209	1	Gm26917	0.00392922	1.75582	0.42	0.323	1
Sec11c	0.0443428	0.171621	0.566	0.432	1	Stox2	0.00483203	0.311922	0.367	0.224	1	Xrcc6	0.0176402	-0.164863	0	0.106	1	Btbd6	2.1867e-06	0.0413032	0.03	0.001	0.0418316	Foxk2	0.0189756	-0.14738	0.111	0.211	1	Camk2d	2.68224e-05	-0.123331	0.994	0.997	0.542484	Fsd1	5.1108e-05	0.060672	0.057	0.017	1	Gm44836	0.00394491	0.0552741	0.036	0.005	1
Atg5	0.0444246	0.110898	0.321	0.198	1	Elavl1	0.0048588	0.248747	0.468	0.327	1	Uba1	0.0176663	-0.176903	0.25	0.47	1	Rtl8c	2.1867e-06	0.0413032	0.03	0.001	0.0418316	Mboat7	0.019001	-0.118644	0.04	0.118	1	Atp6v0e	2.7368e-05	0.0792152	0.426	0.33	0.553519	Trappc10	5.11711e-05	0.142593	0.279	0.174	1	Klf5	0.00394491	0.0552741	0.036	0.005	1
Gpm6b	0.0444289	0.227056	0.887	0.787	1	Flii	0.00486305	0.151529	0.215	0.103	1	Pick1	0.0176778	-0.215051	0.062	0.201	1	Slc16a2	2.20431e-06	0.12908	0.114	0.032	0.0421684	Fars2	0.0191241	-0.164271	0.152	0.256	1	Minar2	2.79066e-05	0.0793843	0.087	0.046	0.564412	Arhgap18	5.18169e-05	0.0485149	0.034	0.007	1	Crabp2	0.00394518	0.124855	0.036	0.005	1
Scyl1	0.044459	-0.149355	0.038	0.131	1	Hdgfl2	0.00493171	0.164668	0.392	0.234	1	Dtx1	0.0177333	0.0765882	0.042	0.008	1	Dyrk2	2.21042e-06	-0.382337	0.687	0.798	0.0422852	Cdc37l1	0.0191581	-0.192731	0.859	0.927	1	Mkln1	2.8365e-05	-0.14066	0.905	0.929	0.573683	Maz	5.23799e-05	0.179821	0.332	0.222	1	Ptprm	0.00394518	0.0771578	0.036	0.005	1
Sall2	0.0446035	-0.148134	0.038	0.131	1	Tmem248	0.00495928	0.171649	0.228	0.112	1	1700047K16Rik	0.0177333	0.0765882	0.042	0.008	1	Kdm2b	2.21067e-06	0.145245	0.181	0.069	0.0422902	Vxn	0.0192852	0.057123	0.071	0.028	1	Mrpl41	2.84016e-05	-0.15792	0.672	0.718	0.574422	Dlgap1	5.24181e-05	0.0728765	0.057	0.017	1	Ttc39a	0.00396421	0.0649831	0.036	0.005	1
Pip4p2	0.0446045	-0.106915	0	0.071	1	Mcoln1	0.00502682	0.149925	0.165	0.07	1	Tnrc6a	0.0177452	-0.355637	0.542	0.627	1	Syn3	2.24289e-06	0.0397949	0.03	0.001	0.0429065	Rab14	0.0196556	-0.162135	0.909	0.948	1	Fryl	2.86144e-05	-0.134098	0.827	0.862	0.578727	Dpysl5	5.28268e-05	0.135667	0.13	0.063	1	Leng8	0.00399742	-0.234866	0.848	0.905	1
Cecr2	0.04462	0.164628	0.811	0.717	1	4632427E13Rik	0.00505806	0.213487	0.696	0.528	1	Mfap3	0.0177808	-0.203231	0.042	0.172	1	Crxos	2.27437e-06	-0.381307	0.41	0.606	0.0435087	Slc26a11	0.0197897	0.0967811	0.141	0.075	1	Ppid	2.87993e-05	0.12061	0.42	0.325	0.582465	Hcn3	5.29037e-05	0.0387362	0.034	0.007	1	Togaram2	0.00400251	0.0649831	0.036	0.005	1
Mmaa	0.0446228	-0.112123	0	0.071	1	Hcfc1r1	0.00507061	0.204817	0.595	0.418	1	Tnpo2	0.0178921	0.165203	0.208	0.101	1	Tpm1	2.29475e-06	0.214462	0.361	0.195	0.0438986	Zfp646	0.0198165	-0.210453	0.182	0.282	1	Rbm17	2.88795e-05	0.198552	0.744	0.678	0.584088	Efnb1	5.41314e-05	0.0538318	0.057	0.017	1	Rbfox2	0.00400486	0.172857	0.152	0.068	1
R3hcc1l	0.0446615	-0.19704	0.132	0.252	1	Adss	0.0050738	0.163064	0.127	0.047	1	Sh2d1a	0.0179091	0.0747837	0.042	0.008	1	Hmga1	2.37586e-06	0.160161	0.199	0.081	0.0454502	Etfrf1	0.0200378	0.14961	0.293	0.198	1	Insm1	2.90937e-05	-0.112693	0.98	0.989	0.588421	Fsd1l	5.47761e-05	0.24392	0.366	0.264	1	Bag5	0.00402041	-0.278923	0.161	0.278	1
Nxf1	0.0446693	0.162284	0.34	0.222	1	Bex3	0.00507644	0.341893	0.671	0.591	1	Fam122a	0.0179733	0.200385	0.438	0.275	1	Lonrf2	2.39644e-06	0.0796981	0.072	0.014	0.0458438	Kcnj14	0.0201811	0.0582333	0.051	0.017	1	Selenos	2.96122e-05	-0.118622	0.634	0.702	0.598906	Map1a	5.50639e-05	0.0708717	0.076	0.028	1	Npas4	0.00402193	0.0935226	0.036	0.005	1
1810021B22Rik	0.0447129	0.0620661	0.075	0.027	1	Syvn1	0.00507845	0.152284	0.19	0.086	1	Rd3	0.0180282	-0.332121	0.521	0.625	1	Ptov1	2.41878e-06	0.265967	0.922	0.835	0.0462713	Tmem248	0.020194	0.128188	0.273	0.179	1	Prkcz	2.99523e-05	-0.157842	0.262	0.335	0.605786	Foxj3	5.51476e-05	0.144809	0.256	0.157	1	Pabpc1	0.00402541	0.232966	0.982	0.955	1
Fabp4	0.0447271	0.0543677	0.057	0.018	1	Msh3	0.00516323	-0.245578	0.203	0.369	1	Grb2	0.0180958	-0.250577	0.146	0.299	1	Ptn	2.44318e-06	0.424986	0.114	0.032	0.046738	Jak3	0.0202103	0.0571332	0.051	0.017	1	Mab21l1	3.01788e-05	-0.118785	0.798	0.856	0.610366	Adcy2	5.52074e-05	0.110978	0.156	0.08	1	Fam162a	0.0040414	0.153467	0.518	0.353	1
Ppp2r5b	0.0447443	-0.11479	0.038	0.135	1	Scarb1	0.00518206	0.204567	0.506	0.343	1	Dnajc2	0.0182157	-0.270154	0.083	0.223	1	Bcl7a	2.47185e-06	0.273169	0.373	0.213	0.0472866	Trappc13	0.0202108	-0.144266	0.172	0.291	1	Galnt7	3.03949e-05	-0.176046	0.74	0.753	0.614737	Pde4dip	5.66014e-05	0.142653	0.267	0.165	1	Gm42696	0.00408008	0.0403211	0.036	0.005	1
Rdh11	0.0447574	0.105062	0.132	0.062	1	Ubxn7	0.00526002	0.168312	0.443	0.283	1	Gm20721	0.0182635	0.0480191	0.042	0.008	1	Gnb4	2.51575e-06	0.08203	0.054	0.007	0.0481263	Fryl	0.0202709	-0.150893	0.899	0.908	1	Commd6	3.09955e-05	0.0967332	0.532	0.419	0.626884	Neat1	5.70511e-05	0.0769786	0.053	0.016	1	Pcdhb9	0.00408008	0.0403211	0.036	0.005	1
Rnf121	0.0448929	0.281794	0.642	0.552	1	St8sia1	0.00527123	-0.165198	0.013	0.114	1	Gm15234	0.0182635	0.0480191	0.042	0.008	1	Usp22	2.54639e-06	0.254592	0.343	0.187	0.0487124	Ssbp1	0.0204044	-0.229742	0.677	0.726	1	Ccl27a	3.11434e-05	0.105938	0.258	0.187	0.629875	Enah	5.74763e-05	-0.258701	0.405	0.512	1	Lgi2	0.00410063	0.141761	0.054	0.013	1
Mgat5	0.0449016	0.0807923	0.113	0.05	1	Haus2	0.00527616	0.109431	0.152	0.061	1	Pde5a	0.0182635	0.0480191	0.042	0.008	1	Apold1	2.5706e-06	0.08203	0.054	0.007	0.0491755	Pax6	0.0204228	0.236957	0.475	0.376	1	Nlk	3.11888e-05	-0.135985	0.993	0.986	0.630794	Rem2	5.80618e-05	0.0649528	0.076	0.028	1	Mrpl2	0.00412329	0.185389	0.616	0.432	1
Atp5j	0.0449342	0.144574	1	0.998	1	Bend5	0.0053233	0.137407	0.152	0.061	1	Gm13063	0.0182635	0.0480191	0.042	0.008	1	Map4k4	2.58241e-06	0.28655	0.506	0.331	0.0494015	Esyt1	0.0204766	0.056034	0.051	0.017	1	Plcd4	3.18614e-05	0.121113	0.116	0.068	0.644397	Slc22a17	5.81157e-05	0.153797	0.26	0.162	1	Rpl30	0.00414468	0.195288	1	1	1
Agpat3	0.0449604	0.1772	0.925	0.952	1	Peli1	0.00533186	0.227198	0.329	0.192	1	Ncmap	0.0182635	0.0480191	0.042	0.008	1	Ndufa2	2.60581e-06	-0.240103	0.976	0.985	0.0498491	Tatdn1	0.0204768	-0.185572	0.141	0.241	1	Map7	3.18784e-05	-0.138952	0.892	0.916	0.64474	Llgl2	5.81907e-05	-0.173443	0.153	0.269	1	Vash1	0.00415075	-0.131507	0.027	0.12	1
Bod1l	0.0449822	0.164496	0.66	0.518	1	Cox7a2l	0.00533946	-0.270828	0.848	0.895	1	Tspan4	0.0182635	0.0480191	0.042	0.008	1	Cfap300	2.62654e-06	0.0656355	0.054	0.007	0.0502457	Tmem64	0.0204917	-0.133423	0.051	0.129	1	Pms2	3.19704e-05	-0.0859005	0.069	0.122	0.646602	Hdac7	5.82692e-05	0.0753565	0.08	0.03	1	Cth	0.00417551	0.577476	0.161	0.082	1
Ccdc142os	0.0449927	0.128521	0.132	0.062	1	Rab5a	0.0053789	0.202308	0.671	0.498	1	Fcho1	0.0182635	0.0480191	0.042	0.008	1	Slc35g2	2.65338e-06	0.236219	0.301	0.153	0.0507592	Cog1	0.0206468	-0.179821	0.131	0.227	1	Kras	3.19861e-05	-0.122483	0.857	0.884	0.646919	Myo1b	5.96575e-05	0.0651966	0.076	0.028	1	Pms1	0.00419234	-0.208325	0.08	0.192	1
Dxo	0.0450466	-0.119829	0.019	0.103	1	Mtss2	0.00538443	0.103267	0.165	0.068	1	Gm11583	0.0182635	0.0480191	0.042	0.008	1	Galnt14	2.66748e-06	0.138064	0.133	0.042	0.0510289	Palld	0.0208317	0.167945	0.101	0.049	1	Rap1b	3.30406e-05	0.154136	0.392	0.309	0.668247	Smarcc1	5.97264e-05	0.167289	0.317	0.208	1	Kcnj12	0.00420209	0.0547512	0.054	0.013	1
Samsn1	0.0450517	0.18413	0.226	0.13	1	Eif5b	0.00540055	0.249363	0.873	0.776	1	D16Ertd472e	0.0182635	0.0480191	0.042	0.008	1	Rps5	2.67141e-06	0.289757	0.994	1	0.0511042	Ppm1f	0.0208477	0.0830557	0.091	0.041	1	Anxa10	3.35819e-05	0.0385386	0.012	0.001	0.679193	Brap	6.0787e-05	0.115893	0.176	0.094	1	Rps25	0.00420701	0.195401	1	0.998	1
Srpr	0.0450574	0.233767	0.509	0.389	1	Tomm7	0.00542239	-0.222522	0.962	0.998	1	Xk	0.0182635	0.0480191	0.042	0.008	1	Hyal3	2.71912e-06	0.0760437	0.066	0.012	0.0520167	Sox9	0.0209093	0.108422	0.141	0.075	1	Tshz1	3.36098e-05	0.126706	0.219	0.154	0.679758	Parp8	6.23755e-05	0.0961385	0.134	0.064	1	Fkbp5	0.00421503	-0.198999	0.071	0.179	1
Snrpg	0.0451082	0.165531	1	0.944	1	Dpf3	0.00542932	-0.182042	0.038	0.154	1	Rps12	0.0183244	0.164305	1	0.995	1	Arhgdig	2.72094e-06	0.08927	0.066	0.012	0.0520516	Fpgt	0.0209617	-0.106915	0.051	0.132	1	Pdhb	3.44612e-05	-0.134776	0.866	0.887	0.696978	Nxnl2	6.25238e-05	-0.267597	0.477	0.581	1	Naca	0.00423632	0.202105	1	1	1
Chrm3	0.0453301	0.163468	0.113	0.051	1	Erf	0.0054523	0.14135	0.114	0.04	1	Sap130	0.0183709	-0.210796	0.042	0.17	1	Dusp22	2.73759e-06	-0.316834	0.247	0.434	0.0523701	Elmod2	0.0210454	-0.200721	0.465	0.58	1	Mrpl48	3.48109e-05	0.100125	0.552	0.439	0.70405	Cdc42bpb	6.34357e-05	0.0948731	0.176	0.093	1	Hs3st3b1	0.00424389	-0.257817	0.33	0.477	1
Fgf13	0.0453371	0.0516092	0.057	0.018	1	Samd7	0.00546447	-0.393256	0.759	0.82	1	Dhcr24	0.018444	0.0462146	0.042	0.008	1	Rnd3	2.73844e-06	0.171489	0.102	0.027	0.0523864	St3gal4	0.0210746	-0.106915	0.04	0.117	1	Znrd1	3.49014e-05	0.152014	0.781	0.722	0.705882	Tmcc3	6.38743e-05	0.0713165	0.084	0.032	1	Pias3	0.00425606	-0.318758	0.643	0.663	1
Cyth3	0.0453371	0.0502319	0.057	0.018	1	Ppfibp1	0.00547696	0.150297	0.127	0.047	1	Fkbp14	0.018444	0.0462146	0.042	0.008	1	Ripply3	2.74045e-06	0.0871616	0.06	0.009	0.0524248	Limd1	0.0211118	-0.199033	0.333	0.455	1	Rpl23a	3.52346e-05	0.0989404	0.999	0.999	0.71262	Fbxo11	6.42365e-05	0.140429	0.302	0.194	1	Rnd1	0.00426631	0.12229	0.045	0.009	1
Igsf21	0.0454619	0.203177	0.679	0.525	1	Eif2s3y	0.00549176	0.229578	0.329	0.199	1	Gxylt2	0.018444	0.0462146	0.042	0.008	1	Abr	2.79981e-06	0.074551	0.066	0.012	0.0535603	Rint1	0.0211626	-0.160599	0.202	0.316	1	Pnisr	3.54407e-05	-0.120232	0.985	0.993	0.716789	Tm7sf2	6.52457e-05	0.0625715	0.061	0.02	1	N4bp2	0.00427398	-0.284316	0.33	0.47	1
Tmem259	0.0454804	-0.208296	0.17	0.288	1	Pter	0.00550873	0.221553	0.152	0.063	1	Mgst1	0.018444	0.0444123	0.042	0.008	1	Gm32585	2.8117e-06	0.109778	0.06	0.009	0.0537878	Gm15809	0.0212026	-0.104023	0.051	0.132	1	Sorbs1	3.58631e-05	0.123857	0.217	0.153	0.725331	Chst10	6.71227e-05	0.0499538	0.05	0.014	1	Fgr	0.00429246	0.0522045	0.054	0.013	1
Npm1	0.0455218	0.195927	0.887	0.853	1	Olfm1	0.00558421	0.500563	0.468	0.355	1	Slc1a5	0.018444	0.0462146	0.042	0.008	1	Hmgn5	2.82141e-06	0.198695	0.301	0.148	0.0539736	C2cd5	0.0212027	-0.242604	0.384	0.469	1	Tmem65	3.67167e-05	0.0928583	0.13	0.08	0.742596	Pik3cb	6.71227e-05	0.0499538	0.05	0.014	1	Pip4k2c	0.00429252	-0.23655	0.277	0.421	1
Prelid1	0.0456243	0.169006	0.755	0.602	1	Pdlim7	0.00559762	0.330087	0.215	0.11	1	Celf5	0.018444	0.0462146	0.042	0.008	1	Kif21a	2.83721e-06	0.340898	0.675	0.504	0.0542758	Topors	0.0212774	0.159538	0.455	0.334	1	Ckb	3.72312e-05	-0.104332	1	1	0.753001	4931414P19Rik	6.80405e-05	0.0474841	0.05	0.014	1	Selenot	0.00429774	-0.239367	0.777	0.857	1
Gatad2b	0.0459431	0.129582	0.585	0.414	1	Tnr	0.0056507	0.1024	0.063	0.014	1	A930012L18Rik	0.018444	0.0462146	0.042	0.008	1	Arhgap24	2.88658e-06	-0.295441	0.096	0.259	0.0552202	Atp6v0b	0.0213293	-0.153495	1	1	1	Eno1	3.77418e-05	-0.153421	0.939	0.948	0.763328	Enox1	6.88623e-05	0.0549059	0.042	0.01	1	Tob2	0.00433291	-0.202608	0.911	0.939	1
Slc15a2	0.0459532	0.048856	0.057	0.018	1	Hist3h2a	0.00566574	0.128358	0.127	0.047	1	Gnb3	0.0184536	0.318814	0.979	0.952	1	4930447C04Rik	2.89411e-06	0.114565	0.127	0.039	0.0553642	Cnga1	0.0213741	-0.148259	1	0.998	1	Fgd4	3.83039e-05	-0.152559	0.847	0.847	0.774695	Gnao1	6.90023e-05	0.161307	0.321	0.214	1	Csnk2a2	0.00435367	0.138663	0.616	0.421	1
Bcl2l13	0.0459716	-0.117074	0.132	0.265	1	Foxk2	0.00571817	0.252717	0.228	0.119	1	Rnf157	0.0185853	-0.275714	0.146	0.296	1	Arhgap12	2.98063e-06	0.191439	0.217	0.094	0.0570194	Atf2	0.0213909	-0.200927	0.354	0.456	1	Sptssa	3.90597e-05	0.150627	0.872	0.836	0.789982	Nt5e	6.94869e-05	-0.220748	0.302	0.423	1	Eif6	0.00436729	0.226409	0.509	0.351	1
Stt3b	0.04617	0.239306	0.302	0.204	1	Rcl1	0.00572903	0.0825913	0.089	0.026	1	Naca	0.0185869	0.166696	1	0.997	1	Mphosph8	3.22183e-06	0.378323	0.614	0.444	0.0616336	Cspp1	0.0214478	-0.188353	0.97	0.987	1	Vps72	3.98604e-05	0.106443	0.439	0.338	0.806177	Agap3	6.97932e-05	0.114908	0.21	0.12	1	Ldlrad4	0.00438439	0.120159	0.071	0.022	1
Stat3	0.0462847	0.125643	0.226	0.13	1	Zdhhc2	0.00575336	-0.25676	0.62	0.724	1	Gpx8	0.018626	0.0426123	0.042	0.008	1	Gnat2	3.23945e-06	0.225659	0.09	0.022	0.0619707	Crtc3	0.021587	-0.245476	0.707	0.75	1	Sdk1	4.01292e-05	0.0659475	0.068	0.033	0.811613	Parm1	6.99123e-05	0.0524277	0.046	0.012	1	Greb1l	0.00442294	0.0841056	0.045	0.009	1
Srp19	0.0463397	0.152918	0.717	0.546	1	Mir670hg	0.00576739	0.0990794	0.063	0.014	1	Ptma	0.0186298	0.31642	0.979	0.991	1	Npm1	3.24221e-06	0.329921	0.928	0.865	0.0620234	Mttp	0.0217296	-0.131546	0.081	0.172	1	Zfp462	4.06706e-05	-0.144128	0.641	0.689	0.822563	Bach1	7.00931e-05	0.134938	0.221	0.13	1	Gm12981	0.00444063	0.0720328	0.045	0.009	1
Gspt1	0.0463465	0.197512	0.887	0.762	1	Gm15655	0.00579668	0.0822056	0.063	0.014	1	Pde12	0.018718	0.136011	0.188	0.086	1	Zfp445	3.2612e-06	-0.418015	0.729	0.77	0.0623868	Ccdc71	0.0219102	-0.143056	0.071	0.155	1	Csnk2a2	4.13446e-05	0.0983444	0.58	0.465	0.836194	Abhd2	7.0681e-05	0.100084	0.065	0.022	1	Cdh13	0.00444082	0.255655	0.205	0.109	1
Dennd2a	0.0464686	0.115308	0.17	0.089	1	Ppp1r13l	0.00582437	0.0684524	0.063	0.014	1	Sapcd1	0.0188094	0.0354347	0.042	0.008	1	Efna2	3.27214e-06	0.130203	0.145	0.049	0.0625961	Pgs1	0.0219255	-0.196637	0.162	0.26	1	Anapc13	4.13664e-05	0.115977	0.931	0.903	0.836635	D430019H16Rik	7.19263e-05	0.159638	0.275	0.176	1	Cfap126	0.00444798	-0.159586	0.089	0.208	1
Mob2	0.0465838	-0.0702501	0.075	0.186	1	Saa3	0.00582437	0.0684524	0.063	0.014	1	Ypel5	0.0188532	-0.189211	0.167	0.342	1	Sncb	3.3127e-06	-0.289531	0.084	0.252	0.063372	Rps29	0.0221823	0.0929722	1	1	1	Pam	4.13684e-05	0.137618	0.101	0.057	0.836676	Dr1	7.26274e-05	0.12687	0.218	0.127	1	Slc27a1	0.00445127	-0.209225	0.107	0.228	1
Ehbp1	0.0466645	0.140265	0.208	0.116	1	Zfp764	0.00583853	0.0818108	0.038	0.005	1	Trim2	0.0189925	-0.216104	0.188	0.361	1	Ttyh2	3.34364e-06	-0.342903	0.422	0.585	0.0639639	Srrm1	0.0222759	-0.195298	0.869	0.911	1	Moxd1	4.15976e-05	0.0569023	0.065	0.03	0.841312	Gm10602	7.36865e-05	0.0410719	0.042	0.01	1	Elmo1	0.00449465	0.113616	0.045	0.009	1
Park7	0.04679	0.20564	0.981	0.941	1	Mrpl39	0.00583974	0.188514	0.456	0.294	1	Ubald1	0.0191913	0.150224	0.271	0.144	1	Shf	3.45197e-06	0.137405	0.133	0.043	0.0660361	Esyt2	0.0222815	-0.208014	0.202	0.298	1	Psma4	4.17892e-05	0.102466	0.939	0.925	0.845186	Galt	7.43169e-05	0.103597	0.149	0.075	1	5430405H02Rik	0.00450425	-0.219627	0.17	0.306	1
Gm48677	0.0468252	0.0741347	0.113	0.05	1	Ctsd	0.0058669	0.208618	0.633	0.463	1	Acads	0.0192157	0.0777693	0.083	0.025	1	Fam161a	3.46329e-06	-0.372372	0.337	0.52	0.0662528	Ap1s1	0.0223165	0.116532	0.101	0.049	1	Gnat2	4.18147e-05	0.150534	0.154	0.1	0.845703	Rapgef2	7.6244e-05	0.103804	0.153	0.078	1	Ncan	0.0045125	0.114623	0.045	0.009	1
Gaa	0.0468273	0.100028	0.189	0.101	1	Cst3	0.00590404	-0.260131	0.975	0.993	1	Slc44a2	0.0192157	0.0777693	0.083	0.025	1	Spast	3.47506e-06	0.284906	0.554	0.384	0.0664778	Ntan1	0.0223412	-0.198357	0.273	0.388	1	Prph	4.19542e-05	0.0755783	0.096	0.053	0.848525	Mthfd2	7.62666e-05	0.0907703	0.092	0.038	1	Dlg1	0.00451403	-0.293101	0.161	0.28	1
Trp53bp1	0.0470149	0.165772	0.302	0.189	1	Scand1	0.00592159	-0.250853	0.911	0.953	1	Riiad1	0.0192751	-0.364307	0.188	0.343	1	Sin3b	3.5005e-06	0.325009	0.789	0.665	0.0669646	Fam98c	0.0224425	-0.213945	0.242	0.341	1	Shf	4.2979e-05	0.077381	0.099	0.055	0.86925	Ywhah	7.66383e-05	0.180755	0.359	0.248	1	Gm48960	0.00451677	-0.149552	0.009	0.086	1
Erich6	0.0471487	-0.125798	0.038	0.133	1	Zbtb8a	0.00592611	0.0645328	0.038	0.005	1	Slc3a2	0.0194006	-0.228919	0.438	0.653	1	6430548M08Rik	3.53465e-06	0.330307	0.361	0.212	0.0676179	Lrrc27	0.0224822	0.0597931	0.091	0.041	1	Crybg3	4.31292e-05	0.131391	0.212	0.149	0.872288	Rp1l1	7.6949e-05	-0.216814	0.317	0.444	1	Tubgcp4	0.00451774	-0.163335	0.08	0.194	1
Eci2	0.0473198	0.181143	0.453	0.332	1	Sel1l3	0.00592611	0.0645328	0.038	0.005	1	Bckdha	0.0194046	0.115892	0.188	0.086	1	Appl1	3.60848e-06	0.29268	0.506	0.334	0.0690303	Ttc33	0.0224939	-0.214444	0.182	0.277	1	Phf14	4.3972e-05	-0.109669	0.734	0.797	0.889334	Ece1	7.70309e-05	0.132816	0.237	0.141	1	Zwint	0.0045277	0.132504	0.429	0.272	1
Ggps1	0.0473387	0.1689	0.547	0.389	1	4930507D05Rik	0.00592611	0.0645328	0.038	0.005	1	Zfp655	0.0195375	0.145859	0.208	0.101	1	Phf20l1	3.68943e-06	0.465567	0.614	0.457	0.0705789	Olfr671	0.0226178	-0.128898	0.071	0.155	1	Gm38405	4.40437e-05	-0.181082	0.391	0.467	0.890785	Diablo	7.79525e-05	0.139086	0.294	0.188	1	2900052N01Rik	0.00453042	0.0789987	0.045	0.009	1
Phip	0.0474715	0.244451	0.679	0.563	1	B4galt6	0.00592611	0.0645328	0.038	0.005	1	Narf	0.0195457	-0.21252	0.125	0.28	1	Tmtc1	3.73423e-06	0.118621	0.078	0.017	0.0714357	Mvb12a	0.0226244	-0.177218	0.131	0.225	1	Srsf1	4.47025e-05	-0.109601	0.94	0.962	0.904108	Porcn	7.95408e-05	0.111589	0.153	0.079	1	Vav2	0.00454811	0.0573024	0.045	0.009	1
Tmx3	0.0475837	0.165576	0.34	0.228	1	Lmo4	0.00594152	0.1709	0.152	0.063	1	Sod2	0.0195665	-0.219505	0.75	0.839	1	H2afy	3.73583e-06	-0.380525	0.807	0.861	0.0714664	Nme7	0.0227589	-0.179337	0.111	0.201	1	Eef1d	4.5427e-05	0.102531	0.478	0.384	0.918761	Phldb1	8.04201e-05	0.0403964	0.031	0.006	1	Prr3	0.00455137	-0.239527	0.179	0.301	1
Ifrd1	0.0476778	-0.208788	0.302	0.449	1	Arpc2	0.00595193	0.249614	0.823	0.778	1	Smpdl3a	0.0196605	0.0742289	0.083	0.025	1	Hist1h3e	3.79234e-06	0.293751	0.392	0.234	0.0725475	1700030J22Rik	0.0227802	-0.160566	0.131	0.228	1	Spg7	4.54745e-05	-0.178462	0.308	0.374	0.919722	Fads1	8.07476e-05	0.106789	0.149	0.076	1	Lhx4	0.00456081	0.175547	0.143	0.065	1
Mrpl16	0.0477297	0.124991	0.415	0.278	1	Kif2a	0.00595645	0.288823	0.722	0.621	1	Gnpda2	0.0196628	0.217798	0.312	0.187	1	Map7d1	3.8015e-06	0.192803	0.223	0.099	0.0727227	Yars2	0.0227867	0.103303	0.162	0.091	1	Drd4	4.58398e-05	-0.140404	0.074	0.126	0.92711	Rnd3	8.16328e-05	0.130449	0.191	0.107	1	Hibadh	0.00458086	-0.262626	0.312	0.448	1
Trmt5	0.0478805	-0.112123	0	0.069	1	Nuak2	0.00597458	0.0651321	0.063	0.014	1	Rps16	0.0197683	0.154874	1	1	1	Mreg	3.83089e-06	0.171603	0.199	0.083	0.0732849	Vat1l	0.022796	0.166766	0.253	0.168	1	Rpl22	4.5893e-05	0.119245	1	0.999	0.928187	Slc8a1	8.29032e-05	0.0521923	0.057	0.018	1	Snf8	0.00459048	0.136092	0.598	0.409	1
Mreg	0.0479596	-0.133719	0.019	0.101	1	Fggy	0.00597458	0.0651321	0.063	0.014	1	U2surp	0.0198716	0.274193	0.896	0.855	1	Ppef2	3.84183e-06	-0.265844	0.175	0.359	0.0734942	Mlst8	0.0228411	0.123636	0.273	0.178	1	Ttyh2	4.64557e-05	-0.138627	0.691	0.732	0.939567	Ftl1	8.31403e-05	0.163644	0.973	0.971	1	Srrm4	0.00461164	-0.20618	0.884	0.946	1
Rnpc3	0.0480902	0.168312	0.358	0.245	1	Zfp169	0.00597458	0.0651321	0.063	0.014	1	Rbp1	0.019886	0.0427507	0.083	0.025	1	Zfp609	3.87328e-06	0.227336	0.373	0.208	0.0740958	Dlat	0.0228757	-0.213069	0.303	0.413	1	Rchy1	4.66927e-05	0.101336	0.542	0.428	0.94436	Ssu72	8.40691e-05	-0.24702	0.66	0.72	1	Syap1	0.0046137	-0.240846	0.188	0.315	1
Gria2	0.0482611	0.102373	0.094	0.039	1	Haus4	0.00597458	0.0651321	0.063	0.014	1	Pet100	0.0198897	-0.26493	0.562	0.697	1	Srrm2	3.89421e-06	0.236483	0.982	0.958	0.0744963	Stau2	0.0229176	-0.164507	0.111	0.207	1	Sertad2	4.70307e-05	0.157851	0.366	0.29	0.951197	Psmd2	8.44855e-05	0.167245	0.412	0.295	1	Klf9	0.00462183	-0.239399	0.991	0.993	1
Fam149a	0.0483113	-0.142292	0.057	0.159	1	Dgkh	0.00599081	-0.28478	0.063	0.187	1	Alg3	0.0202406	0.100662	0.125	0.048	1	Ccdc86	3.90551e-06	-0.322452	0.163	0.333	0.0747123	Cog5	0.0230213	-0.135302	0.212	0.336	1	Kitl	4.71666e-05	0.0563326	0.043	0.016	0.953944	Tmem184c	8.52635e-05	0.10119	0.195	0.109	1	Synrg	0.00462832	-0.284651	0.696	0.746	1
Ppp1r9a	0.0484921	0.175549	0.472	0.331	1	Hsp90ab1	0.0059969	0.18341	1	0.993	1	Lrit1	0.020257	-0.324657	0.375	0.512	1	Src	4.02119e-06	0.0913581	0.078	0.017	0.0769253	Dixdc1	0.0230335	0.173415	0.566	0.444	1	Fam181b	4.80234e-05	0.0380597	0.033	0.01	0.971274	Sobp	8.87843e-05	0.0908371	0.137	0.068	1	Fau	0.00463456	0.246605	1	1	1
Ccpg1	0.0485448	0.194673	0.604	0.455	1	Exoc5	0.00600758	0.22094	0.43	0.285	1	Ten1	0.0203493	-0.303854	0.333	0.482	1	Gspt1	4.08992e-06	0.281636	0.867	0.778	0.0782402	Ptprn	0.0231897	0.217533	0.182	0.109	1	Rem2	4.80342e-05	0.0650576	0.083	0.043	0.971491	Wdr20	9.07525e-05	-0.167793	0.145	0.253	1	Gnb5	0.00469168	-0.260715	0.777	0.823	1
D130020L05Rik	0.0486145	0.0901648	0.094	0.039	1	1700019D03Rik	0.00601468	0.0470454	0.038	0.005	1	Camk1d	0.0205147	-0.40277	0.271	0.412	1	Otx2os1	4.21221e-06	-0.26641	0.084	0.248	0.0805796	Zfp229	0.0232157	-0.117082	0.02	0.084	1	Kcnmb4os2	4.83952e-05	0.0425238	0.025	0.006	0.978794	Cecr2	9.14251e-05	-0.213761	0.355	0.473	1	Psmd2	0.00470183	-0.229295	0.634	0.735	1
Rnf113a2	0.048833	-0.135174	0.057	0.159	1	Abcb4	0.00601468	0.0470454	0.038	0.005	1	Peli2	0.0205269	-0.278383	0.125	0.269	1	Tulp4	4.24006e-06	0.262032	0.584	0.413	0.0811123	Dmpk	0.023289	-0.110912	0.03	0.1	1	Knop1	4.93055e-05	-0.139197	0.824	0.847	0.997204	Bmp7	9.22478e-05	0.0571162	0.053	0.016	1	Ptp4a3	0.00470517	-0.235206	0.982	0.996	1
Tspan7	0.0488418	-0.214387	0.642	0.748	1	Gm35021	0.00601468	0.0470454	0.038	0.005	1	Eloa	0.0205431	-0.270552	0.167	0.315	1	Map2k6	4.25319e-06	0.179489	0.157	0.058	0.0813635	Slc3a2	0.0234342	-0.15192	0.727	0.807	1	Peli1	4.9519e-05	0.0986894	0.567	0.463	1	Cox8a	9.29227e-05	-0.141367	0.989	0.999	1	Cnih1	0.00470982	0.206978	0.562	0.389	1
Cep126	0.0488603	-0.2079	0.151	0.274	1	Carmil2	0.00601468	0.0470454	0.038	0.005	1	Ndufa13	0.0206729	-0.21918	1	0.982	1	Cpne3	4.25351e-06	0.257388	0.41	0.245	0.0813696	Ptch1	0.0235689	-0.238666	0.222	0.313	1	Timm8b	4.9924e-05	0.132613	0.972	0.962	1	Nxph4	9.33454e-05	0.162555	0.237	0.144	1	Tmem132b	0.00471407	0.0399262	0.045	0.009	1
Tlk1	0.0490138	-0.230805	0.245	0.375	1	Nhsl1	0.00601468	0.0470454	0.038	0.005	1	Snw1	0.0207982	0.242681	0.833	0.704	1	Satb1	4.28697e-06	0.17821	0.253	0.118	0.0820098	Gprasp2	0.0235792	0.0815299	0.182	0.104	1	A930003O13Rik	5.00805e-05	-0.116371	0.077	0.129	1	Pcyox1	9.37568e-05	0.0992612	0.13	0.063	1	Cntd1	0.00471408	0.0424729	0.045	0.009	1
Tmem80	0.0491608	0.15418	0.34	0.222	1	2025-09-10	0.00601468	0.0470454	0.038	0.005	1	Zfyve9	0.0208227	-0.216242	0.083	0.222	1	Pym1	4.29669e-06	0.214242	0.259	0.127	0.0821956	Tmem135	0.023635	-0.187903	0.414	0.521	1	Gls	5.01282e-05	-0.154594	0.522	0.575	1	Aarsd1	9.39938e-05	0.16242	0.347	0.239	1	Jund	0.00471745	0.269319	1	1	1
Kansl1	0.0492	0.137842	0.679	0.493	1	Atoh7	0.00601468	0.0470454	0.038	0.005	1	Tmem267	0.0208395	0.110418	0.167	0.073	1	Inpp5f	4.34693e-06	0.177029	0.181	0.072	0.0831569	Cadm1	0.0236376	-0.20197	0.869	0.942	1	Hint1	5.05506e-05	0.102643	0.991	0.99	1	Tmem181a	9.44395e-05	0.158226	0.206	0.12	1	Snx32	0.00471828	-0.254434	0.223	0.362	1
Ptp4a2	0.0492553	0.13604	0.66	0.473	1	Ripply3	0.00601468	0.0470454	0.038	0.005	1	Eml4	0.0208536	0.136067	0.208	0.101	1	Pja2	4.35135e-06	0.306768	0.602	0.444	0.0832412	Trappc2	0.0236979	-0.157541	0.182	0.294	1	Llgl2	5.0776e-05	-0.161436	0.408	0.474	1	Fam124a	9.47985e-05	0.0687861	0.061	0.02	1	Tdrd7	0.00475645	-0.262425	0.277	0.41	1
Bcdin3d	0.0496082	0.0877112	0.208	0.115	1	Tbc1d10c	0.00601468	0.0470454	0.038	0.005	1	Ttc39b	0.0209011	-0.159986	0	0.101	1	Ugp2	4.3852e-06	0.251929	0.307	0.163	0.083889	Surf2	0.0237408	0.109981	0.263	0.169	1	P4hb	5.09626e-05	0.0920654	0.515	0.407	1	Kpna3	9.63713e-05	-0.237182	0.294	0.412	1	Zfp62	0.00481159	-0.280095	0.268	0.389	1
Grik5	0.0496265	-0.131204	0.019	0.1	1	Fnbp1l	0.00605061	0.134909	0.114	0.04	1	Ssx2ip	0.0211858	-0.265247	0.458	0.6	1	Hnrnpd	4.45915e-06	0.28488	0.904	0.809	0.0853035	Stx6	0.0239135	-0.200715	0.414	0.518	1	Rbm42	5.12664e-05	0.0952022	0.481	0.38	1	Myo5a	9.74558e-05	0.122949	0.187	0.105	1	Enpp5	0.00482472	-0.234949	0.179	0.306	1
Spata2	0.0496267	-0.133719	0.019	0.1	1	Gaa	0.00605769	0.140795	0.152	0.063	1	Ciapin1	0.0213748	-0.266222	0.25	0.404	1	Ubtd2	4.49424e-06	0.108316	0.127	0.04	0.0859749	Vps39	0.0239351	-0.137417	0.121	0.22	1	Safb	5.1457e-05	-0.110837	0.669	0.727	1	Hunk	9.86359e-05	0.0828392	0.076	0.029	1	Rpl31	0.0048325	0.235588	0.991	0.984	1
E2f3	0.0496873	-0.175618	0.208	0.341	1	Ap2m1	0.0060678	-0.275472	0.899	0.928	1	Zbtb37	0.0214391	0.178936	0.271	0.149	1	Scpep1	4.50825e-06	0.140927	0.145	0.05	0.0862429	Os9	0.0239598	0.17166	0.434	0.329	1	Msh3	5.22201e-05	-0.190369	0.324	0.388	1	Mindy2	0.000101794	0.162559	0.282	0.183	1	Aig1	0.00485439	0.245162	0.527	0.391	1
Rangrf	0.0497546	-0.124896	0.019	0.1	1	Tmem69	0.00606961	0.0927272	0.101	0.033	1	Kif1b	0.0216569	-0.354792	0.75	0.846	1	Fasn	4.51506e-06	0.170528	0.211	0.091	0.086373	Zbtb12	0.0239927	-0.116885	0.03	0.099	1	Nme1	5.27618e-05	0.119565	0.89	0.874	1	Wdr31	0.000102934	-0.161521	0.122	0.226	1	Gm12802	0.00487053	-0.29282	0.402	0.554	1
Rbm4b	0.049812	0.15647	0.264	0.165	1	Psme1	0.00612373	0.125408	0.101	0.033	1	Arhgef1	0.0216788	-0.170383	0.021	0.135	1	Sema5a	4.53386e-06	0.0783621	0.042	0.004	0.0867328	Gnal	0.0240059	0.0414199	0.071	0.029	1	Prr14	5.28194e-05	-0.148572	0.371	0.441	1	Dgkh	0.000104458	0.140861	0.29	0.185	1	Gmps	0.0049006	0.135882	0.554	0.373	1
4933409K07Rik	0.0500284	0.0722349	0.094	0.039	1	Rnf44	0.00612396	0.151529	0.215	0.105	1	Hmces	0.0217376	0.117553	0.188	0.087	1	Nptx2	4.63421e-06	0.0768585	0.042	0.004	0.0886524	Lrch1	0.0242614	0.0588048	0.03	0.008	1	Gnb5	5.30149e-05	-0.12551	0.884	0.905	1	Cacna1e	0.000104966	0.0201896	0.015	0.001	1	1110051M20Rik	0.00492557	-0.30153	0.286	0.414	1
Cdc34	0.0502784	0.187944	0.566	0.432	1	9330182L06Rik	0.00612807	0.0618193	0.063	0.014	1	Pcp4	0.0218471	0.084137	0.104	0.037	1	Gm13375	4.66703e-06	0.0535587	0.042	0.004	0.0892803	Mark2	0.0242867	0.154308	0.505	0.392	1	Epb41l4b	5.38188e-05	0.0635695	0.07	0.034	1	Gm43112	0.000104966	0.0201896	0.015	0.001	1	Rpl27a	0.00497528	0.165672	1	1	1
Zfp174	0.0505089	0.0830721	0.075	0.028	1	Bend4	0.00615078	0.0436942	0.038	0.005	1	Tex261	0.0218798	0.195715	0.521	0.349	1	Smarcd1	4.71286e-06	0.318238	0.56	0.405	0.0901569	Pcbp1	0.0243081	-0.132609	0.879	0.918	1	Satb1	5.41407e-05	0.124521	0.362	0.284	1	Gm10484	0.000104966	0.0201896	0.015	0.001	1	Pigc	0.00499618	-0.158572	0.062	0.17	1
Exoc6b	0.0509991	-0.142013	0.038	0.128	1	Chn2	0.00615078	0.037015	0.038	0.005	1	Snx1	0.0218842	0.185028	0.229	0.12	1	Xylt1	4.76439e-06	0.11612	0.096	0.025	0.0911428	Antxr2	0.0243717	0.120256	0.222	0.14	1	Ptms	5.4772e-05	0.125674	1	1	1	Gm10399	0.000104966	0.0201896	0.015	0.001	1	Fryl	0.00501332	-0.205162	0.688	0.776	1
Gm46404	0.051	-0.148134	0.038	0.128	1	Gas1	0.00615078	0.0436942	0.038	0.005	1	Selenot	0.0219723	-0.294031	0.542	0.676	1	Denr	4.78585e-06	0.2814	0.602	0.425	0.0915532	Nrn1l	0.0245152	0.16726	0.192	0.117	1	Hsd17b12	5.50723e-05	0.0978291	0.356	0.268	1	Hist4h4	0.000104966	0.0201896	0.015	0.001	1	Fbl	0.0050251	0.160601	0.536	0.376	1
Gm9869	0.0513112	0.142314	0.264	0.161	1	Syt4	0.00615078	0.0436942	0.038	0.005	1	Ndufaf3	0.0220097	-0.301179	0.458	0.57	1	Clpb	4.89725e-06	0.308146	0.325	0.182	0.0936843	Ndufaf2	0.0246613	0.167008	0.333	0.229	1	Siah2	5.55923e-05	0.120139	0.179	0.122	1	Arhgef15	0.000104966	0.0201896	0.015	0.001	1	Cerkl	0.00503576	-0.269386	0.366	0.513	1
Dscaml1	0.0513346	0.137181	0.283	0.174	1	Rnf141	0.00615668	0.0996385	0.127	0.047	1	Srp14	0.0221997	0.201167	0.958	0.875	1	Elmsan1	5.13083e-06	0.100836	0.072	0.015	0.0981528	Rims1	0.0247082	0.0554742	0.03	0.008	1	Zfand3	5.57475e-05	0.131785	0.391	0.309	1	Erbb2	0.000104966	0.0201896	0.015	0.001	1	Rpl36al	0.00505553	0.292015	0.982	0.966	1
Zfp961	0.0513455	-0.101688	0	0.067	1	Ap1ar	0.00620914	0.187549	0.253	0.133	1	Uqcrc2	0.0222781	-0.265372	0.542	0.694	1	Sinhcaf	5.2994e-06	0.15363	0.12	0.038	0.101378	Smad5	0.0247643	0.156883	0.434	0.312	1	Pcdhb17	5.67098e-05	0.0941253	0.149	0.096	1	Tmem74	0.000104966	0.0201896	0.015	0.001	1	Rps11	0.00507793	0.178779	1	1	1
Per3	0.0513544	-0.140191	0.113	0.233	1	Phf3	0.00622844	0.235751	0.823	0.636	1	Clec11a	0.0222869	0.123671	0.125	0.049	1	Scg2	5.41774e-06	-0.322137	0.048	0.192	0.103641	Rassf8	0.0247684	-0.241492	0.333	0.418	1	Cabp4	5.67153e-05	-0.156554	0.178	0.24	1	Gpr156	0.000104966	0.0201896	0.015	0.001	1	Smc3	0.00511252	0.173073	0.991	0.941	1
D630045J12Rik	0.0513834	-0.189785	0.113	0.222	1	Cntfr	0.0062619	0.168908	0.139	0.056	1	Stxbp2	0.022309	0.204912	0.167	0.078	1	Cmip	5.43969e-06	0.1863	0.247	0.116	0.104061	Pno1	0.0248122	0.102686	0.273	0.177	1	Rhbdd1	5.68328e-05	0.0903617	0.085	0.046	1	Ppm1g	0.000107316	0.155113	0.305	0.203	1	Gm6598	0.00511289	-0.135622	0	0.066	1
Myorg	0.0515754	0.0647959	0.075	0.028	1	Rhobtb3	0.00626448	0.137641	0.152	0.063	1	Swap70	0.022331	0.0920182	0.062	0.016	1	Ddx1	5.50802e-06	-0.327215	0.566	0.697	0.105368	Acly	0.0248747	0.148909	0.657	0.503	1	Sys1	5.70879e-05	0.111203	0.99	0.991	1	Mdm1	0.000107437	-0.22586	0.24	0.351	1	Gm49602	0.00512471	-0.193009	0.08	0.194	1
Epn2	0.0516116	-0.173733	0.151	0.276	1	Rpl13a	0.00627745	0.147333	1	0.995	1	Spire1	0.0224143	-0.267676	0.125	0.266	1	Onecut1	5.5527e-06	0.118471	0.096	0.025	0.106223	Lrrc14b	0.0249355	0.0360011	0.04	0.012	1	Hspa4l	5.807e-05	-0.135308	0.931	0.949	1	Ndufv3	0.000107464	-0.200226	0.878	0.897	1	Scamp5	0.0051591	-0.221503	0.232	0.369	1
Fam168a	0.0516882	0.182726	0.566	0.426	1	Ccdc25	0.00630454	0.263549	0.557	0.414	1	Prps1l3	0.0225903	0.129056	0.146	0.062	1	Cdkn2aip	5.56064e-06	0.272534	0.289	0.149	0.106375	Gm48855	0.0249424	-0.0991168	0.04	0.113	1	Rpl26	5.81577e-05	0.101017	0.999	0.998	1	Hsp90aa1	0.000108021	-0.146682	1	0.997	1	Mrpl21	0.00520353	0.0933882	0.589	0.403	1
Ep300	0.0517895	0.253167	0.585	0.502	1	Ndufs5	0.00631006	-0.205802	0.962	0.995	1	Pik3c3	0.0227619	-0.164863	0	0.098	1	Cep85l	5.58792e-06	0.124306	0.108	0.031	0.106897	Zfp526	0.0250415	0.069709	0.051	0.018	1	Auh	5.8316e-05	0.0979373	0.607	0.489	1	Smoc1	0.000108334	0.0432206	0.034	0.008	1	Galnt7	0.00520562	-0.37346	0.482	0.588	1
Yrdc	0.0518169	-0.158191	0.132	0.251	1	Prkca	0.00643725	-0.262753	0.152	0.294	1	Gm17435	0.0227926	0.0884428	0.062	0.016	1	Hnrnpc	5.67894e-06	0.347154	0.789	0.662	0.108638	Golga4	0.0250553	0.147741	0.768	0.625	1	Cul5	5.87184e-05	-0.146185	0.747	0.787	1	Pnma2	0.000110185	0.0379068	0.034	0.008	1	Morf4l2	0.00523306	0.229023	0.83	0.797	1
Thap7	0.0519472	0.105142	0.226	0.13	1	Mrpl53	0.00644475	-0.201432	0.38	0.561	1	Rragd	0.0231261	0.203023	0.354	0.219	1	Zfpm1	5.80731e-06	0.198369	0.235	0.109	0.111094	1700109G14Rik	0.0251094	0.0319023	0.03	0.008	1	Eif4e2	5.91608e-05	0.0887501	0.533	0.427	1	Chrna3	0.000111139	0.107975	0.126	0.061	1	Tigar	0.00524297	-0.256608	0.107	0.217	1
Brcc3	0.0521618	0.0955313	0.472	0.317	1	Ppp4r2	0.00650445	0.241289	0.608	0.449	1	Chchd2	0.023156	-0.177525	1	1	1	mt-Atp8	6.00381e-06	-0.304058	0.904	0.95	0.114853	Zfp39	0.0251874	0.0773805	0.081	0.036	1	Sap18	5.96784e-05	0.100974	0.593	0.491	1	Mib1	0.000112196	-0.220695	0.26	0.375	1	Acot7	0.00526672	-0.228883	0.098	0.206	1
Rps19	0.0521981	0.123699	1	0.992	1	Polg2	0.00650476	-0.184017	0.063	0.187	1	Gde1	0.0232747	-0.314042	0.458	0.599	1	Chgb	6.0194e-06	0.348697	0.982	0.983	0.115151	Fam161a	0.0252075	-0.24071	0.687	0.736	1	Eif3j1	5.97061e-05	0.0860518	0.559	0.452	1	Atp6ap2	0.000112325	0.223234	0.416	0.31	1	Bmpr2	0.00527128	0.174799	0.58	0.416	1
Noa1	0.0522244	0.0928746	0.226	0.13	1	Irgq	0.0065177	0.140263	0.177	0.079	1	Dnajc3	0.0234966	0.245157	0.479	0.313	1	Rac1	6.04042e-06	0.214989	0.428	0.253	0.115553	Msantd1	0.0252623	0.0307904	0.03	0.008	1	Hcfc1r1	6.02163e-05	0.129284	0.627	0.546	1	Pold4	0.000113815	0.0715365	0.088	0.036	1	Nktr	0.00529681	-0.207971	0.991	0.996	1
Prmt9	0.0525645	0.196457	0.17	0.092	1	Ubtd1	0.00652207	-0.312666	0.367	0.516	1	Rims2	0.0235183	-0.306932	0.25	0.407	1	Cep70	6.04919e-06	0.156495	0.157	0.058	0.115721	Kif23	0.0252623	0.0307904	0.03	0.008	1	Pid1	6.10949e-05	0.186538	0.219	0.159	1	Rps15	0.000114542	-0.192761	0.931	0.938	1	Plekha8	0.00529965	-0.203388	0.107	0.222	1
Thra	0.0529574	0.180376	0.491	0.358	1	U2surp	0.00652886	0.175291	0.949	0.804	1	Nmral1	0.023574	0.0604284	0.062	0.016	1	Gnai3	6.08194e-06	0.257125	0.277	0.142	0.116348	Tmlhe	0.0252643	0.0348968	0.04	0.012	1	Upf3b	6.13202e-05	-0.140545	0.94	0.962	1	Mpp4	0.000115311	-0.207899	0.313	0.433	1	mt-Cytb	0.00530275	0.106445	1	1	1
Eif3k	0.053049	0.175445	0.906	0.802	1	Sh3glb1	0.00654295	-0.291873	0.633	0.724	1	Pcdhb14	0.023574	0.062215	0.062	0.016	1	Ubtf	6.14307e-06	0.301925	0.608	0.44	0.117517	Zfp830	0.0252654	-0.170663	0.141	0.238	1	Rps6	6.1328e-05	0.103798	0.998	0.997	1	Atad2b	0.000115634	-0.214636	0.237	0.351	1	Vopp1	0.00530444	-0.204671	0.786	0.837	1
Cldnd1	0.0531026	0.15489	0.453	0.322	1	Gga2	0.00655597	0.0868712	0.127	0.047	1	Col17a1	0.023574	0.062215	0.062	0.016	1	Saal1	6.45673e-06	0.233739	0.199	0.086	0.123517	Lin7a	0.025267	0.149661	0.131	0.071	1	Mxi1	6.17546e-05	0.125615	0.729	0.661	1	Hexim1	0.000115976	0.129705	0.198	0.115	1	Rpl14	0.00530506	0.165993	1	1	1
Rpl3	0.0531523	0.136291	1	0.995	1	Acyp2	0.0065561	0.109289	0.101	0.033	1	Naa40	0.0236993	-0.214795	0.083	0.218	1	Dmac1	6.50866e-06	-0.263022	0.157	0.331	0.124511	Rpgr	0.0253812	-0.209627	0.677	0.696	1	Mid1ip1	6.19352e-05	0.107689	0.164	0.11	1	Met	0.000116719	0.0661872	0.038	0.009	1	Kdm6a	0.00530639	-0.274428	0.241	0.367	1
Chmp2a	0.0532927	-0.223126	0.849	0.883	1	Ndufc1	0.0065645	-0.188987	0.962	0.993	1	Slc25a51	0.0237597	-0.229194	0.083	0.217	1	Clstn1	6.56325e-06	0.307639	0.94	0.872	0.125555	Zscan29	0.0253999	-0.180869	0.111	0.197	1	Ddb1	6.1955e-05	-0.116764	0.887	0.911	1	Gm28050	0.000117333	0.0868974	0.065	0.023	1	Prr13	0.00531632	-0.214791	0.116	0.233	1
Prr14	0.0532936	-0.160747	0.132	0.249	1	Akt2	0.00658959	0.144327	0.266	0.14	1	Fn3krp	0.0238149	0.0604284	0.062	0.016	1	Vangl2	6.59689e-06	0.157233	0.139	0.048	0.126199	Mpeg1	0.025416	0.0285692	0.03	0.008	1	Dlgap4	6.34515e-05	0.105549	0.334	0.25	1	Dchs1	0.000117364	0.0516026	0.046	0.013	1	Cep290	0.00532119	-0.155022	0.911	0.968	1
Gm41611	0.0533531	0.0244504	0.075	0.028	1	B230216N24Rik	0.00659984	0.0921897	0.051	0.009	1	Abraxas2	0.0238253	0.298786	0.396	0.276	1	Rbpj	6.60003e-06	0.277445	0.494	0.328	0.126259	Adam4	0.0254225	0.0593341	0.051	0.018	1	Zfp260	6.40513e-05	0.0951306	0.48	0.383	1	Sfrp1	0.000117632	0.0551905	0.046	0.013	1	Akap8l	0.00534146	0.249109	0.741	0.62	1
Pxn	0.0534266	0.095548	0.094	0.04	1	Man2a1	0.00659986	0.109063	0.051	0.009	1	Rnf167	0.0238687	-0.208358	0.146	0.305	1	Fam76a	6.62798e-06	0.263747	0.494	0.318	0.126793	Fbxo44	0.02543	0.0337934	0.04	0.012	1	Pdpk1	6.42613e-05	0.104879	0.51	0.406	1	Carns1	0.000118615	0.0313718	0.027	0.005	1	Tcf12	0.00534692	-0.199673	0.857	0.892	1
Sharpin	0.0534418	0.138555	0.245	0.149	1	Map7d1	0.00660362	0.145202	0.215	0.105	1	Ppara	0.0240578	0.058644	0.062	0.016	1	Nfe2l1	6.67482e-06	0.410631	0.59	0.455	0.127689	Spg21	0.0254515	0.140598	0.303	0.204	1	Ckmt1	6.45353e-05	-0.155106	0.24	0.308	1	Megf11	0.00011944	0.0903083	0.073	0.027	1	Srp14	0.00536527	0.159114	0.991	0.966	1
Cadm1	0.0535536	0.331842	0.774	0.745	1	Akr7a5	0.00660427	0.181925	0.405	0.255	1	Gcfc2	0.0240665	0.109898	0.125	0.049	1	2025-09-04	6.7829e-06	0.311758	0.542	0.382	0.129757	Ftsj1	0.0255621	-0.136586	0.091	0.179	1	Wapl	6.64009e-05	-0.129678	0.794	0.83	1	Ehd4	0.00011971	0.101053	0.134	0.067	1	Tbc1d32	0.00546813	-0.141679	0.098	0.213	1
Drap1	0.0536299	0.160823	0.679	0.556	1	Tmem237	0.00661115	-0.323401	0.62	0.722	1	Tspan15	0.0242451	0.170781	0.333	0.19	1	Mob4	6.85491e-06	0.257334	0.747	0.582	0.131134	5730405O15Rik	0.0255632	-0.0859454	0	0.048	1	Sub1	6.66247e-05	0.0918048	0.973	0.966	1	Nptxr	0.000119931	0.0297097	0.027	0.005	1	Rdh5	0.00547237	0.130266	0.062	0.018	1
Rhot2	0.0536482	-0.197509	0.113	0.22	1	Nfrkb	0.00664504	-0.168971	0.177	0.336	1	Psma5	0.0242799	0.333497	0.729	0.678	1	Pygo1	7.07969e-06	0.183377	0.12	0.039	0.135434	Ndnf	0.0255764	0.459349	0.222	0.153	1	Ppp4r3a	6.73408e-05	0.0913101	0.554	0.447	1	Irs1	0.000120372	0.0499538	0.046	0.013	1	Egflam	0.00547854	-0.245955	0.375	0.532	1
Gorab	0.0536822	0.0731494	0.17	0.088	1	Cfap126	0.00666329	-0.171123	0.013	0.11	1	Gm5617	0.0242808	-0.297555	0.208	0.356	1	Il18	7.14892e-06	0.067136	0.048	0.006	0.136759	Fstl5	0.0256553	0.31797	0.101	0.051	1	Gm44196	6.82693e-05	-0.105973	0.114	0.174	1	Wdr60	0.000120475	-0.192223	0.183	0.294	1	Elp5	0.00553463	0.204557	0.33	0.213	1
Eif1b	0.0538032	0.204907	0.868	0.752	1	Gm21781	0.00675533	0.0921897	0.051	0.009	1	Rdh14	0.0243462	-0.250664	0.229	0.388	1	Dab2ip	7.17497e-06	0.197105	0.253	0.121	0.137257	Khnyn	0.0256714	-0.11999	0.03	0.097	1	Dok7	6.83305e-05	0.0499466	0.037	0.013	1	Mpp3	0.000121095	0.0538318	0.057	0.019	1	Pik3r1	0.00554462	-0.247246	0.938	0.982	1
Prox1	0.0538309	0.0942003	0.094	0.04	1	Mapre3	0.00688315	-0.291981	0.316	0.453	1	Ubc	0.0243937	-0.343267	0.5	0.668	1	Prkar2b	7.27605e-06	0.117727	0.06	0.01	0.139191	Adssl1	0.0257066	0.0708082	0.051	0.018	1	Nin	6.88877e-05	0.149579	0.524	0.429	1	Clip4	0.000123015	-0.167402	0.149	0.258	1	Crxos	0.00556376	-0.200418	0.143	0.272	1
Gm15860	0.0538309	0.0942003	0.094	0.04	1	Zc3h12c	0.00690502	0.150297	0.139	0.056	1	Ap1s2	0.0244484	-0.259106	0.396	0.576	1	Bub1b	7.2853e-06	0.0588684	0.048	0.006	0.139368	Panx1	0.0257404	0.0872803	0.121	0.062	1	Eif5a	6.95215e-05	0.105287	0.938	0.919	1	Chst11	0.000123902	0.0443752	0.038	0.009	1	Anapc10	0.00557657	-0.283571	0.196	0.315	1
Ccdc191	0.0538782	0.229142	0.321	0.218	1	Gm13375	0.00691389	0.0578382	0.051	0.009	1	Gm19938	0.0245493	0.0550818	0.062	0.016	1	Pcsk5	7.2853e-06	0.0588684	0.048	0.006	0.139368	Hmx1	0.0257536	0.134586	0.232	0.146	1	Uba52	7.00163e-05	0.112436	0.935	0.933	1	Parp4	0.000124632	0.0407354	0.038	0.009	1	Asph	0.00559118	0.184771	0.33	0.211	1
Snhg15	0.0539152	-0.109852	0.151	0.282	1	Mki67	0.00691389	0.0578382	0.051	0.009	1	Marcks	0.0246819	0.218254	0.812	0.638	1	Klhl13	7.2853e-06	0.0588684	0.048	0.006	0.139368	Itpr1	0.0257614	0.0625283	0.071	0.03	1	Lrrc57	7.0086e-05	-0.155087	0.206	0.27	1	Tmem219	0.000124928	0.0785714	0.099	0.043	1	Slc3a2	0.00560388	0.477421	0.839	0.832	1
Hs2st1	0.0540385	-0.210117	0.208	0.326	1	Otop3	0.00691389	0.0578382	0.051	0.009	1	Per3	0.0246897	0.182393	0.333	0.198	1	Hist1h4h	7.31612e-06	0.274815	0.313	0.166	0.139957	Fam76a	0.0258339	0.165933	0.475	0.367	1	Trim67	7.14854e-05	0.0929181	0.144	0.092	1	Prkacb	0.000126111	0.172504	0.267	0.173	1	Spats2l	0.00560675	0.134175	0.062	0.018	1
Armc8	0.0541094	-0.183132	0.113	0.221	1	Hist1h3a	0.00691389	0.0578382	0.051	0.009	1	Rab3d	0.0247363	0.0742289	0.083	0.026	1	Map1lc3b	7.61205e-06	0.301574	0.898	0.781	0.145618	Stk32a	0.0259525	0.0439978	0.061	0.023	1	Nabp2	7.21418e-05	0.092763	0.514	0.413	1	Phactr4	0.00012662	0.110132	0.153	0.08	1	Jun	0.0056316	0.404091	0.991	0.986	1
Tmed9	0.0542486	0.254957	0.755	0.642	1	1810041H14Rik	0.00691389	0.0578382	0.051	0.009	1	Sh3bgrl2	0.0247686	-0.234913	0.083	0.216	1	Zbtb38	7.64895e-06	0.247578	0.247	0.119	0.146324	Ywhag	0.0261094	0.157856	0.515	0.412	1	Myom1	7.21641e-05	0.0554796	0.044	0.018	1	Rab8b	0.00012686	0.137199	0.153	0.082	1	Tc2n	0.00563965	0.130266	0.062	0.018	1
Gm48768	0.054338	-0.150575	0.038	0.126	1	Gm3728	0.00691389	0.0578382	0.051	0.009	1	Snx15	0.0247845	0.187468	0.292	0.17	1	Prrc2b	7.70276e-06	0.302478	0.669	0.519	0.147354	Ext1	0.0261818	-0.214228	0.343	0.437	1	Rpl37	7.22028e-05	0.107408	1	1	1	Atp5k	0.000129666	-0.180029	0.966	0.973	1	Nsa2	0.00564236	0.149516	0.955	0.892	1
Gosr1	0.0544031	0.128743	0.189	0.105	1	Ccdc149	0.00691522	0.0717804	0.051	0.009	1	Fcf1	0.0248141	-0.241204	0.125	0.27	1	Ttl	7.72582e-06	0.0967413	0.054	0.008	0.147795	2610301B20Rik	0.0262909	-0.170032	0.131	0.225	1	Snrpa	7.23627e-05	0.0753412	0.424	0.328	1	Narf	0.000130746	0.131479	0.263	0.166	1	Odc1	0.00564637	0.27423	0.714	0.634	1
Impdh2	0.0545068	0.131787	0.283	0.178	1	Plekhh1	0.00691522	0.0717804	0.051	0.009	1	Agl	0.0249918	-0.273422	0.208	0.368	1	Rasgef1b	7.86937e-06	0.13164	0.133	0.045	0.150541	Dleu2	0.0263238	-0.262822	0.434	0.535	1	Zfp365	7.23906e-05	-0.171161	0.378	0.439	1	Stx1b	0.000130915	0.0614524	0.069	0.025	1	Dennd5b	0.00564917	0.334382	0.375	0.26	1
Bcorl1	0.0545748	0.0743911	0.057	0.019	1	Arhgdig	0.00691522	0.0717804	0.051	0.009	1	Slain1	0.0250532	0.0902956	0.125	0.049	1	Arpc1a	7.89951e-06	0.299687	0.681	0.548	0.151118	Rictor	0.0266428	-0.217867	0.525	0.584	1	Cisd2	7.29347e-05	-0.119904	0.871	0.891	1	Dock9	0.000131277	0.113899	0.095	0.042	1	Slc2a13	0.00570841	0.127733	0.062	0.018	1
Pnisr	0.0548131	0.172641	0.925	0.863	1	Bicdl1	0.00695115	-0.287985	0.304	0.453	1	Pex5l	0.0251969	-0.23538	0.458	0.673	1	Fam117b	7.91559e-06	0.208621	0.319	0.171	0.151425	Ablim1	0.0266614	0.106259	0.232	0.145	1	Gnb2	7.29777e-05	0.128643	0.972	0.967	1	B930095G15Rik	0.000132645	0.10036	0.111	0.052	1	Snca	0.00571398	-0.222026	0.098	0.21	1
Manf	0.0549331	0.174863	0.736	0.667	1	Hsp90aa1	0.00705182	-0.172968	1	1	1	Sumf1	0.0252793	0.072462	0.083	0.026	1	Meig1	7.9209e-06	-0.255447	0.078	0.228	0.151527	Gm30893	0.0267102	0.0654891	0.02	0.004	1	Cecr2	7.42187e-05	-0.15068	0.773	0.8	1	Sfxn1	0.000132761	0.0810979	0.111	0.051	1	Cops4	0.00575043	0.198734	0.571	0.407	1
Miga2	0.0550623	-0.0951273	0	0.065	1	Hist1h2ac	0.00707736	0.0545025	0.051	0.009	1	Zfp947	0.0252793	0.072462	0.083	0.026	1	Skil	7.95528e-06	0.362128	0.645	0.463	0.152185	Pus3	0.0267122	0.14742	0.273	0.183	1	Zfp536	7.51147e-05	-0.120021	0.925	0.933	1	B3galnt1	0.000134086	0.0666735	0.053	0.017	1	Epc2	0.00576265	0.257348	0.5	0.364	1
Rbbp8	0.0550754	-0.0990673	0	0.065	1	Ncald	0.00707736	0.0478541	0.051	0.009	1	Zfp445	0.0253748	-0.294077	0.604	0.794	1	Sqstm1	8.02515e-06	0.299611	0.404	0.249	0.153521	Arhgef11	0.0267475	-0.161114	0.323	0.43	1	Ercc3	7.51366e-05	-0.215997	0.453	0.495	1	Wnk3	0.000137215	0.0554965	0.069	0.025	1	Cxadr	0.00577611	0.2699	0.223	0.127	1
1810024B03Rik	0.0551042	-0.104304	0	0.065	1	Scai	0.00708441	0.138345	0.278	0.15	1	Dync1li2	0.0254211	-0.269482	0.188	0.334	1	Cdv3	8.0515e-06	0.361379	0.452	0.305	0.154025	Arid4a	0.0267804	0.166311	0.576	0.444	1	4932438A13Rik	7.57283e-05	-0.12532	0.74	0.783	1	Ccdc92	0.000137483	0.080546	0.107	0.049	1	Tsg101	0.00579452	-0.179315	0.902	0.921	1
C2cd3	0.0551382	-0.133399	0.038	0.126	1	Nrbf2	0.00708477	0.165133	0.304	0.173	1	Hnrnpk	0.0256655	0.173472	0.938	0.934	1	Mtmr12	8.0867e-06	0.0723571	0.054	0.008	0.154699	Sephs1	0.0269088	-0.127379	0.131	0.235	1	Eif2s3x	7.60732e-05	0.0866644	0.52	0.419	1	Gprasp2	0.000137715	0.0797105	0.122	0.058	1	Zfand6	0.00579852	-0.184021	0.929	0.952	1
Ormdl3	0.0552774	-0.251438	0.491	0.589	1	Klhl8	0.00712452	0.152673	0.177	0.082	1	Ssu72	0.0258114	0.262435	1	0.98	1	Nrep	8.26559e-06	-0.376594	0.717	0.797	0.158121	Hecw2	0.0270025	0.0493183	0.02	0.004	1	Krcc1	7.69722e-05	0.137226	0.365	0.283	1	Stmn1	0.000141133	0.234199	0.855	0.778	1	Mtm1	0.00579902	-0.190517	0.08	0.186	1
Shisa2	0.0554843	0.248445	0.547	0.435	1	Tra2b	0.00712735	0.255393	0.823	0.785	1	Epg5	0.0258863	0.0876345	0.104	0.038	1	Igsf3	8.27294e-06	0.0641366	0.054	0.008	0.158261	Mir124-2hg	0.0270177	-0.146718	0.99	1	1	Ppt2	7.73399e-05	-0.122766	0.159	0.22	1	Usp33	0.000142512	-0.204219	0.229	0.339	1	Tmem50a	0.00582178	-0.158833	0.714	0.805	1
Sugt1	0.0554895	-0.190311	0.377	0.512	1	Cacna2d1	0.00716929	0.131525	0.139	0.056	1	Rdh10	0.025968	0.216833	0.25	0.141	1	Rimklb	8.27504e-06	0.0790337	0.054	0.008	0.158301	Rhpn1	0.0271013	-0.167977	0.131	0.223	1	Atrx	7.7938e-05	-0.135736	0.956	0.961	1	Prr36	0.00014348	0.0668158	0.076	0.03	1	Cln3	0.0058261	-0.250319	0.366	0.522	1
Med28	0.0555748	0.154141	0.755	0.618	1	Atp6v1b2	0.00723145	0.240685	0.81	0.678	1	Nedd4	0.0260227	0.182891	0.979	0.986	1	Amigo2	8.29874e-06	0.0708598	0.054	0.008	0.158755	Med13l	0.0271363	-0.205388	0.465	0.546	1	Spata24	7.83731e-05	0.0890841	0.12	0.073	1	Comt	0.000143762	0.106725	0.237	0.144	1	Zfp945	0.00584653	-0.218477	0.08	0.185	1
Nphp3	0.0557381	0.0529878	0.057	0.019	1	Atp5g2	0.00726657	-0.16703	1	0.998	1	Sncb	0.0260582	-0.253346	0.083	0.213	1	Rgr	8.36453e-06	0.13885	0.12	0.039	0.160014	Sh2b1	0.0271729	0.123569	0.374	0.264	1	A930006I01Rik	7.85947e-05	0.062183	0.114	0.068	1	Epb41l5	0.000146455	-0.227042	0.351	0.46	1	Msantd4	0.00588023	0.119939	0.455	0.296	1
Gamt	0.0557619	0.17147	0.208	0.124	1	2025-03-08	0.00727572	0.144379	0.367	0.215	1	Bola1	0.0260626	0.230298	0.604	0.462	1	Fbxl7	8.43461e-06	-0.303827	0.102	0.26	0.161354	Cnot4	0.0271874	-0.190143	0.434	0.52	1	Klf9	7.99596e-05	-0.130829	0.986	0.989	1	Apc	0.00014684	0.17005	0.504	0.386	1	Pik3ip1	0.00596337	0.180228	0.116	0.048	1
Nudt4	0.0558168	0.122495	0.189	0.104	1	Celf2	0.00730233	-0.275032	0.772	0.853	1	Crocc	0.0261666	0.199511	0.646	0.468	1	Btg1	8.52788e-06	-0.254468	0.892	0.955	0.163138	Plgrkt	0.0271885	-0.248647	0.333	0.42	1	Htra1	7.99891e-05	0.174053	0.395	0.317	1	Mmp14	0.000147806	0.0721236	0.08	0.032	1	Taf15	0.00596346	0.281621	0.723	0.624	1
Srr	0.0558652	0.162409	0.245	0.15	1	Zfp444	0.00731669	0.191895	0.886	0.811	1	Lrrc28	0.0261742	0.125649	0.146	0.063	1	Bcl2l1	8.67404e-06	0.240949	0.452	0.282	0.165934	Slc45a3	0.0272235	0.0363585	0.02	0.004	1	Pigyl	8.18861e-05	0.0801031	0.443	0.345	1	Rfc2	0.000148352	0.109923	0.214	0.126	1	Zfyve16	0.0059924	-0.268196	0.179	0.297	1
Kif24	0.0560956	0.0516092	0.057	0.019	1	Syngr1	0.00735116	-0.230934	0.418	0.596	1	Hyal1	0.0261863	0.0858847	0.104	0.038	1	Aig1	8.72791e-06	0.30403	0.476	0.319	0.166965	Bag3	0.0272235	0.0363585	0.02	0.004	1	Krit1	8.219e-05	-0.121512	0.738	0.78	1	Pip4k2a	0.000148861	0.0608991	0.076	0.03	1	Gm15446	0.00600218	-0.0889933	0.009	0.082	1
Itpr1	0.0560956	0.0516092	0.057	0.019	1	Xiap	0.00735188	-0.23587	0.506	0.68	1	Skp1a	0.0263468	0.238079	0.833	0.705	1	Bex2	8.73074e-06	0.278418	0.801	0.683	0.167019	Gm15582	0.0272235	0.0363585	0.02	0.004	1	Mdk	8.30247e-05	0.0524782	0.153	0.097	1	Arhgap35	0.000150447	0.138549	0.233	0.144	1	Slc31a2	0.00600762	-0.285169	0.312	0.446	1
Sgpp1	0.0561377	0.0893942	0.151	0.077	1	Ubc	0.00741553	-0.267656	0.797	0.879	1	Sms	0.0264474	0.316396	0.438	0.318	1	Clta	8.86485e-06	-0.223893	0.964	0.983	0.169585	Lrrtm3	0.0272235	0.0363585	0.02	0.004	1	Fkbp3	8.3086e-05	0.110401	0.943	0.93	1	Lrch1	0.00015378	0.0330358	0.023	0.003	1	Sipa1l1	0.00601704	0.214269	0.179	0.093	1
Ap3d1	0.056178	0.231906	0.491	0.365	1	Elovl2	0.00743062	0.297509	0.494	0.355	1	Morf4l1	0.0264519	0.234062	0.917	0.874	1	Dtna	8.91582e-06	0.176394	0.139	0.049	0.17056	2810433D01Rik	0.0272235	0.0363585	0.02	0.004	1	Tusc3	8.49334e-05	0.0680927	0.495	0.384	1	Gon4l	0.000154808	0.146787	0.332	0.226	1	Fut8	0.00602375	0.0926856	0.062	0.018	1
Cdkl2	0.0562175	-0.176559	0.113	0.224	1	Trim35	0.00744766	0.219902	0.316	0.189	1	Snx5	0.0265045	-0.201713	0.104	0.246	1	Uqcc3	8.92239e-06	-0.301475	0.512	0.686	0.170685	9030624G23Rik	0.0272235	0.0363585	0.02	0.004	1	Hsbp1	8.62314e-05	0.103514	0.981	0.975	1	Zfp318	0.000154872	0.150561	0.275	0.181	1	Gm17491	0.00604155	-0.23665	0.134	0.249	1
Rab10os	0.0563028	-0.124197	0.17	0.302	1	Grk2	0.00747534	0.118705	0.241	0.121	1	Wdr18	0.0265051	-0.187036	0.062	0.193	1	Mxi1	9.03284e-06	0.22411	0.657	0.466	0.172798	Gm49654	0.0272235	0.0363585	0.02	0.004	1	Rcbtb2	8.66655e-05	0.0951321	0.149	0.097	1	Per2	0.000155381	0.0276626	0.023	0.003	1	mt-Atp6	0.00607136	0.15905	1	1	1
Ankrd9	0.0564549	0.0502319	0.057	0.019	1	Stx7	0.00749738	0.19185	0.316	0.187	1	Kif2a	0.0265479	0.265068	0.729	0.596	1	Kctd15	9.32715e-06	0.192938	0.235	0.112	0.178428	Gpc5	0.0272235	0.0363585	0.02	0.004	1	Epc2	8.71477e-05	0.106591	0.52	0.412	1	Fam78a	0.000155381	0.0276626	0.023	0.003	1	Tardbp	0.00608636	-0.245842	0.777	0.846	1
Miga1	0.0564811	-0.187647	0.094	0.197	1	Csad	0.00752755	0.133533	0.228	0.114	1	Zfp638	0.0266414	0.209986	0.708	0.526	1	Stx12	9.34408e-06	0.245298	0.47	0.308	0.178752	Plaat1	0.0272235	0.0363585	0.02	0.004	1	Tmem135	9.01269e-05	-0.148198	0.31	0.378	1	Mertk	0.000155381	0.0276626	0.023	0.003	1	Dock4	0.00609693	0.116105	0.107	0.043	1
Zcwpw1	0.0565408	0.0864755	0.113	0.052	1	Syn1	0.00762028	0.10914	0.076	0.021	1	Nedd8	0.0266796	0.209426	0.958	0.905	1	Nudt16l1	9.48157e-06	0.146647	0.181	0.074	0.181382	Celsr2	0.0272235	0.144517	0.283	0.192	1	Snhg1	9.01677e-05	0.197789	0.67	0.6	1	Stk32c	0.000155381	0.0276626	0.023	0.003	1	Cyp4f13	0.00609895	-0.144925	0.027	0.111	1
Abcb9	0.0565771	0.0654548	0.038	0.01	1	Spop	0.00762583	0.235553	0.886	0.769	1	Arl14ep	0.0269166	0.161207	0.25	0.136	1	Afdn	9.49108e-06	0.249596	0.506	0.329	0.181564	Sod1	0.0272336	0.202867	0.556	0.462	1	Nsfl1c	9.07917e-05	0.0829012	0.588	0.48	1	Dclk3	0.000155381	0.0276626	0.023	0.003	1	Higd2a	0.00610096	0.22642	0.955	0.95	1
Arrdc4	0.0567769	0.0708859	0.094	0.04	1	Bach1	0.00764467	0.200647	0.367	0.229	1	Mvk	0.0269749	-0.194249	0.062	0.188	1	Slc24a1	9.8713e-06	-0.31449	0.042	0.176	0.188838	Adk	0.0272557	0.10721	0.121	0.064	1	Arhgdig	9.08607e-05	0.0869767	0.083	0.045	1	Osmr	0.000155381	0.0276626	0.023	0.003	1	Tmem98	0.00614334	-0.141524	0.018	0.097	1
Ccdc88a	0.0570436	0.15638	0.566	0.432	1	Eipr1	0.00765091	0.144327	0.266	0.143	1	Coq8b	0.0269808	0.276722	0.521	0.363	1	Ddah2	9.91862e-06	0.376887	0.452	0.302	0.189743	Cacnb2	0.0273592	-0.169094	0.465	0.57	1	BC017158	9.13649e-05	-0.123681	0.134	0.192	1	Ppargc1b	0.000155421	-0.162951	0.095	0.188	1	Spata7	0.00614382	-0.308675	0.277	0.398	1
Rhoq	0.0570569	-0.100378	0	0.064	1	Pcbp4	0.00766206	0.18429	0.987	0.958	1	Tro	0.0270472	0.154865	0.104	0.039	1	Egr1	1.00326e-05	0.612442	0.398	0.251	0.191924	Tfpi	0.0273717	0.0352432	0.02	0.004	1	Mtmr9	9.13956e-05	0.0958789	0.189	0.13	1	Cdk2	0.000157004	0.0268304	0.023	0.003	1	Ybx3	0.0061763	-0.244373	0.982	0.993	1
Bora	0.0570626	-0.100378	0	0.064	1	Tia1	0.00766815	0.197186	0.646	0.495	1	Prdx1	0.027195	0.305803	0.708	0.556	1	Bcl2l11	1.01158e-05	0.238576	0.217	0.102	0.193514	Ushbp1	0.0274456	0.0232608	0.02	0.004	1	Fyn	9.18186e-05	0.101318	0.137	0.088	1	Vps13c	0.000158843	0.115706	0.202	0.118	1	Necab2	0.00618315	0.244976	0.143	0.068	1
Car2	0.05712	0.147237	0.906	0.784	1	Ercc3	0.00781985	-0.272128	0.342	0.5	1	Pigp	0.0273303	0.265904	0.604	0.508	1	Hmgxb4	1.01352e-05	0.231172	0.343	0.195	0.193886	Gm26744	0.0274456	0.0232608	0.02	0.004	1	Srpk3	9.25164e-05	0.0452048	0.042	0.016	1	Clcn5	0.00016079	0.0698322	0.065	0.023	1	Msi1	0.00618954	-0.180248	0.946	0.978	1
Tmem86a	0.0572977	0.191385	0.528	0.4	1	Med22	0.00782608	0.150268	0.354	0.213	1	Ap3d1	0.0274757	0.224759	0.458	0.314	1	Synm	1.01709e-05	0.10928	0.084	0.021	0.194569	Nagk	0.0274752	-0.134578	0.061	0.139	1	Adra1a	9.27472e-05	0.030149	0.022	0.005	1	4930402H24Rik	0.000163144	0.123878	0.206	0.122	1	Dgkz	0.00622054	0.11657	0.125	0.054	1
Map9	0.0573688	-0.262657	0.358	0.469	1	Ndrg1	0.00785426	-0.204978	0.835	0.965	1	Tmem230	0.0275063	-0.277876	0.583	0.714	1	Zfp579	1.03301e-05	0.344588	0.392	0.247	0.197615	Slc12a5	0.0275104	-0.190472	0.152	0.241	1	Tdrd7	9.38235e-05	-0.164555	0.369	0.435	1	Syt3	0.000164058	0.0293285	0.019	0.002	1	Bbip1	0.00625552	-0.171831	0.759	0.862	1
4833422C13Rik	0.0575288	0.111819	0.075	0.029	1	Lgr5	0.00788394	0.102553	0.076	0.021	1	Sesn1	0.0275497	-0.232274	0.188	0.337	1	Amer1	1.03997e-05	0.144091	0.139	0.049	0.198946	Ccl25	0.0275404	-0.127685	0.212	0.328	1	Hps3	9.47054e-05	-0.153798	0.233	0.298	1	Slc18a1	0.000164058	0.0293285	0.019	0.002	1	Gm50240	0.00628637	-0.104343	0.196	0.324	1
Rcbtb1	0.0578802	0.116273	0.208	0.12	1	Gas6	0.00789685	-0.224681	0.342	0.512	1	Usp30	0.027697	0.102025	0.167	0.076	1	H1fx	1.04918e-05	0.236123	0.229	0.107	0.200707	1700016L21Rik	0.0275951	0.0221446	0.02	0.004	1	Dennd5a	9.49203e-05	0.118394	0.593	0.506	1	Vegfb	0.000164415	0.0800801	0.13	0.064	1	Moxd1	0.00630089	0.0732383	0.062	0.018	1
Psph	0.0580467	0.172653	0.283	0.186	1	Dct	0.0079056	0.65841	0.57	0.467	1	Kif5b	0.0278928	0.227213	0.792	0.725	1	Mpped2	1.06468e-05	0.445462	0.651	0.516	0.203674	Gm13091	0.0275951	0.0221446	0.02	0.004	1	Pnck	9.54496e-05	0.0504189	0.071	0.036	1	Dgki	0.000165366	0.0239353	0.019	0.002	1	Ubn1	0.00631985	0.209205	0.634	0.48	1
Plekho1	0.0580604	0.0668466	0.094	0.04	1	Chchd10	0.00790717	-0.201818	0.962	0.991	1	1700025G04Rik	0.0279377	0.161801	0.354	0.213	1	Hist1h1c	1.07145e-05	-0.39142	0.494	0.687	0.204968	Gm28523	0.0275951	0.0221446	0.02	0.004	1	Ttc9	9.59846e-05	0.0553395	0.046	0.019	1	Dgka	0.000165366	0.0239353	0.019	0.002	1	Thtpa	0.00633539	0.0992895	0.098	0.038	1
Rsph10b	0.0580605	0.0614785	0.094	0.04	1	Pex11a	0.00791112	-0.186805	0.114	0.25	1	Idnk	0.0280427	-0.145256	0	0.092	1	Slc8a1	1.08215e-05	0.0716468	0.036	0.003	0.207016	Syt3	0.0275951	0.0221446	0.02	0.004	1	Ciao2a	9.72121e-05	0.072055	0.462	0.359	1	Panx2	0.000165366	0.0239353	0.019	0.002	1	Tmem41b	0.00634184	-0.225968	0.232	0.367	1
Prdx2	0.0581118	0.180722	0.943	0.901	1	Glcci1	0.00795401	0.303355	0.772	0.755	1	Mllt3	0.0281836	-0.215051	0.062	0.185	1	Spg21	1.08265e-05	0.224566	0.331	0.184	0.207112	Itga11	0.0275951	0.0221446	0.02	0.004	1	mt-Co2	9.94673e-05	0.106541	1	1	1	Map7	0.000165851	-0.224413	0.389	0.496	1	Timm21	0.00640777	-0.222026	0.098	0.208	1
Gm42418	0.058155	-0.130762	1	1	1	Atrx	0.00796158	0.254787	0.81	0.687	1	Ei24	0.0284112	-0.228408	0.25	0.406	1	Pttg1ip	1.08916e-05	0.172474	0.223	0.103	0.208356	Glt8d2	0.0275951	0.0221446	0.02	0.004	1	Mrps11	0.000100004	0.114355	0.435	0.347	1	Ap1s1	0.000167509	0.0703754	0.099	0.044	1	Brinp2	0.00643276	0.187798	0.071	0.023	1
Vti1a	0.0581594	-0.143961	0.057	0.15	1	Doc2b	0.0079635	-0.235632	0.165	0.313	1	Luc7l	0.0285305	-0.276675	0.438	0.552	1	Lipa	1.08929e-05	0.0998974	0.084	0.021	0.208382	Map6d1	0.0275951	0.0221446	0.02	0.004	1	Tagln2	0.000100007	0.127645	0.118	0.072	1	Smad2	0.00016756	0.124811	0.229	0.139	1	Ilkap	0.00643385	0.17061	0.527	0.355	1
Mfap1a	0.0581595	-0.145164	0.057	0.15	1	Ap5m1	0.00812716	0.193449	0.241	0.129	1	Arl3	0.0285947	-0.298485	0.833	0.907	1	Pou3f1	1.09474e-05	0.0550639	0.036	0.003	0.209423	Parp14	0.0275951	0.0221446	0.02	0.004	1	D430042O09Rik	0.000100967	-0.191333	0.488	0.515	1	Ush2a	0.000168404	-0.111426	0.038	0.115	1	Rpgr	0.00645455	-0.259952	0.446	0.579	1
Lca5	0.0581675	-0.246325	0.264	0.37	1	Agap1	0.00814934	0.308403	0.367	0.243	1	Slc9a6	0.0286285	0.0996538	0.146	0.063	1	Slc8a2	1.09474e-05	0.0550639	0.036	0.003	0.209423	Gm13944	0.0275951	0.0221446	0.02	0.004	1	Dgcr6	0.000101421	0.10347	0.52	0.424	1	Hook3	0.000168512	-0.267431	0.496	0.576	1	Wdr54	0.00645877	-0.15153	0.036	0.125	1
Lrriq3	0.0582069	0.0394595	0.038	0.01	1	Cbr1	0.00815785	0.180778	0.405	0.259	1	Naglu	0.0286957	0.114602	0.104	0.039	1	Mab21l1	1.10087e-05	-0.325831	0.307	0.484	0.210596	Kif5c	0.0276224	0.100047	0.172	0.099	1	Anxa2	0.000101883	0.0719462	0.059	0.028	1	Meis1	0.000172034	-0.194231	0.256	0.375	1	Ric3	0.00648433	-0.283671	0.304	0.428	1
Reck	0.0582069	0.0394595	0.038	0.01	1	Sv2a	0.00818273	0.207586	0.354	0.217	1	Etfb	0.0286998	0.199471	0.5	0.349	1	H1f0	1.10656e-05	0.409083	0.59	0.438	0.211685	Fance	0.0276649	-0.221826	0.455	0.533	1	Ptpn1	0.000102098	0.0961725	0.445	0.349	1	Bbs5	0.00017625	-0.157182	0.111	0.208	1	Gspt1	0.0065042	-0.198665	0.866	0.896	1
Insm2	0.0582069	0.0394595	0.038	0.01	1	Cdk5rap3	0.00825676	0.183548	0.43	0.273	1	Snap91	0.0289008	-0.240275	0.292	0.455	1	F2r	1.10745e-05	0.0467004	0.036	0.003	0.211854	Adamtsl1	0.0277452	0.0210293	0.02	0.004	1	Aknaos	0.000102202	0.0440979	0.024	0.006	1	Kctd16	0.000178884	0.0415633	0.031	0.006	1	Tmem65	0.00653772	0.168536	0.116	0.05	1
Pcdhb6	0.0582069	0.0394595	0.038	0.01	1	Mapk8	0.00828099	0.170295	0.468	0.311	1	Nol4l	0.0289771	0.0868565	0.542	0.354	1	Tspan9	1.1122e-05	0.251728	0.283	0.152	0.212765	Tnfrsf19	0.0277452	0.0210293	0.02	0.004	1	Dync1li1	0.000102239	-0.141781	0.901	0.917	1	Mt3	0.00017912	0.0387362	0.031	0.006	1	Bcl7a	0.00655041	0.188261	0.562	0.4	1
Hsdl2	0.0583526	0.11265	0.189	0.105	1	Rnd3	0.00829272	0.09927	0.076	0.021	1	Crot	0.0290068	0.207621	0.188	0.093	1	Kcnk12	1.11621e-05	0.0603704	0.036	0.003	0.213531	Axl	0.0278959	0.0199148	0.02	0.004	1	Prrc1	0.000102778	0.131304	0.306	0.237	1	Pxylp1	0.000183332	0.0362495	0.031	0.006	1	Tmem138	0.00656558	-0.290564	0.277	0.4	1
Mysm1	0.0583535	-0.202015	0.226	0.351	1	Zswim5	0.00829887	0.182429	0.101	0.035	1	Usp33	0.0291604	-0.309484	0.396	0.537	1	Fggy	1.11621e-05	0.067136	0.036	0.003	0.213532	Esam	0.0278959	0.0199148	0.02	0.004	1	Zwint	0.000103521	0.0850565	0.381	0.292	1	Bicd2	0.000184274	0.100081	0.156	0.084	1	Carhsp1	0.00659222	0.11854	0.098	0.038	1
Tmem167b	0.0584218	-0.141553	0.057	0.15	1	Rcn2	0.00830699	0.149772	0.266	0.145	1	Akap11	0.0291635	-0.211477	0.208	0.362	1	Zeb1	1.12731e-05	0.22388	0.416	0.253	0.215655	St3gal1	0.0279647	-0.144838	0.141	0.236	1	C030017B01Rik	0.000103773	0.0339074	0.024	0.006	1	Zc3h14	0.000184404	-0.209469	0.389	0.513	1	Exoc6b	0.00659854	-0.214185	0.116	0.226	1
Ttbk2	0.0584633	0.117182	0.226	0.133	1	Flywch1	0.00832448	0.135311	0.304	0.171	1	Ccnj	0.0292304	-0.138661	0	0.091	1	Plxna4	1.13351e-05	0.0451952	0.036	0.003	0.21684	Cirbp	0.0279687	-0.138835	0.99	0.984	1	Ttc3	0.000106397	0.0988094	0.959	0.962	1	Crb2	0.000184533	-0.116504	0.042	0.119	1	Tub	0.00667902	-0.332797	0.527	0.586	1
Gm42854	0.058539	0.038069	0.038	0.01	1	Armh4	0.00832871	0.224693	0.228	0.117	1	Uaca	0.029363	0.0928646	0.146	0.063	1	Arhgef40	1.14696e-05	0.0854333	0.084	0.021	0.219414	Snrpb2	0.0279884	0.13681	0.485	0.366	1	Ccnq	0.000107079	0.125246	0.265	0.199	1	Rnf227	0.000186724	0.0924599	0.153	0.081	1	Epha5	0.00669174	0.147213	0.938	0.873	1
Gm49025	0.058539	0.038069	0.038	0.01	1	Mier1	0.00834357	0.276223	0.544	0.416	1	E130218I03Rik	0.0293821	-0.265843	0.271	0.435	1	Klf9	1.16852e-05	-0.330734	0.825	0.903	0.223539	Npnt	0.0280837	-0.137309	0.051	0.124	1	Atp6v0b	0.000109552	-0.0946562	1	1	1	Prim1	0.000189051	0.0543668	0.046	0.013	1	Zfp87	0.00671222	-0.165103	0.027	0.109	1
Maff	0.058539	0.038069	0.038	0.01	1	Snca	0.00834593	-0.181628	0.025	0.129	1	Fn3k	0.0293887	-0.217893	0.146	0.29	1	Psme1	1.1951e-05	0.1363	0.133	0.046	0.228622	Hdhd3	0.0281115	-0.0998948	0.03	0.097	1	1500004A13Rik	0.000110763	0.0838452	0.097	0.056	1	Stox2	0.000189418	0.167847	0.397	0.289	1	Pkp4	0.00672735	0.121141	0.17	0.084	1
Dhh	0.058539	0.038069	0.038	0.01	1	Afdn	0.00838467	0.233731	0.481	0.346	1	Kifap3	0.0295012	-0.208669	0.583	0.714	1	Lca5	1.19999e-05	0.337696	0.512	0.366	0.229558	Zdhhc14	0.0281532	-0.103851	0.02	0.081	1	Mt1	0.000111127	0.0542208	0.166	0.108	1	Snrnp70	0.000189701	-0.234671	0.653	0.71	1	Wtap	0.00674682	0.209167	0.571	0.416	1
B4galt4	0.058539	0.038069	0.038	0.01	1	Cdk5r2	0.00840518	-0.343944	0.228	0.348	1	Ranbp6	0.0295755	0.114662	0.208	0.105	1	Cog7	1.21039e-05	0.254897	0.416	0.263	0.231548	Tspan17	0.0282071	0.177342	0.242	0.161	1	Smdt1	0.000111175	0.105382	0.981	0.976	1	Fyn	0.000190223	0.0852619	0.137	0.07	1	Ppp6c	0.00675242	-0.238047	0.17	0.287	1
Zfp655	0.0585532	-0.142757	0.057	0.15	1	Hmgn2	0.00845424	-0.227642	1	1	1	Ndufb10	0.0296204	-0.251585	0.938	0.96	1	Pde6a	1.22112e-05	-0.245843	0.042	0.175	0.2336	Clstn1	0.0282399	-0.15626	0.97	0.991	1	Slc6a6	0.000111793	-0.17007	0.427	0.487	1	Lmo4	0.0001914	0.10273	0.233	0.142	1	Susd3	0.00675575	-0.159608	0.259	0.401	1
Selenon	0.0587576	0.0937086	0.189	0.104	1	Slc2a1	0.00848762	0.268757	0.608	0.46	1	Ano2	0.029656	0.177568	0.5	0.337	1	Fbxw8	1.26089e-05	0.152266	0.169	0.068	0.241209	Nom1	0.0282987	0.15638	0.394	0.291	1	Ccnd1	0.000113466	0.0541561	0.194	0.131	1	Hspa12a	0.000191577	0.10592	0.172	0.096	1	mt-Co3	0.00678181	0.0807976	1	1	1
Mink1	0.0587754	0.090945	0.17	0.091	1	Dnajc1	0.00849278	0.165133	0.291	0.166	1	Srcap	0.0297203	-0.213448	0.167	0.319	1	Cisd3	1.26144e-05	-0.25787	0.133	0.292	0.241313	Gm16982	0.0284726	-0.184388	0.172	0.267	1	Itch	0.000113685	-0.125429	0.802	0.841	1	Atn1	0.00019238	0.153509	0.24	0.152	1	Pcp4l1	0.00678616	0.498605	0.116	0.052	1
C130036L24Rik	0.0588251	0.0830721	0.075	0.029	1	Samd14	0.00850995	0.138126	0.114	0.042	1	Focad	0.0297404	0.107615	0.104	0.039	1	Rps7	1.2847e-05	0.203068	1	1	0.245763	Impdh1	0.0285002	-0.168449	0.929	0.959	1	Uhmk1	0.000114741	-0.150215	0.371	0.438	1	Homer1	0.000192811	0.110456	0.168	0.093	1	Atp6v1g1	0.00679839	0.180272	1	0.987	1
Tfpt	0.0589025	0.121022	0.226	0.134	1	Rundc3b	0.00859295	0.106172	0.127	0.049	1	Cbx2	0.0297404	0.107615	0.104	0.039	1	Prom1	1.29036e-05	-0.32375	0.849	0.898	0.246846	Mkln1	0.0286029	-0.167672	0.919	0.956	1	Sec11c	0.000117679	0.101885	0.511	0.414	1	Ankrd11	0.000193081	0.17965	0.534	0.419	1	Lrp8	0.00681767	0.274862	0.616	0.475	1
Prkar2a	0.0590173	0.161933	0.585	0.44	1	Dgkd	0.00863967	0.293296	0.633	0.472	1	Mex3a	0.0298138	0.0999427	0.083	0.028	1	Hsd17b12	1.30708e-05	0.25837	0.44	0.28	0.250044	Trp53i11	0.0286065	0.0841811	0.121	0.063	1	Klc1	0.000118126	-0.128248	0.862	0.879	1	Tcf12	0.000194103	-0.208106	0.382	0.494	1	Hras	0.0068395	0.167329	0.491	0.335	1
Ythdc1	0.0590549	0.157905	0.83	0.699	1	Itsn1	0.00867166	0.15301	0.266	0.145	1	mt-Nd5	0.0298986	-0.179937	1	0.999	1	Calm3	1.34847e-05	0.348106	0.753	0.619	0.257962	Gm17494	0.0286782	-0.116885	0.03	0.096	1	Mmgt2	0.000118908	0.0815568	0.196	0.136	1	Tjp2	0.000195264	0.0980701	0.141	0.074	1	Kbtbd11	0.0068406	0.103327	0.098	0.038	1
Nup107	0.0591084	-0.102997	0	0.063	1	Rsf1	0.00872746	0.298622	0.582	0.453	1	Scrn2	0.0301218	-0.207542	0.083	0.211	1	Ube2e1	1.36764e-05	0.254782	0.512	0.343	0.26163	Pclo	0.0289069	-0.248406	0.707	0.717	1	Nab1	0.000120034	0.116512	0.227	0.165	1	Kcnj3	0.000202418	0.0422284	0.046	0.013	1	Rab21	0.00687049	0.20514	0.491	0.342	1
Gatad1	0.0592104	-0.223774	0.283	0.392	1	Dennd1b	0.00875053	0.20027	0.354	0.217	1	Usp2	0.0302079	-0.321356	0.333	0.487	1	Laptm4a	1.37896e-05	0.346032	0.536	0.391	0.263795	Rap1gap2	0.0289334	0.122627	0.141	0.08	1	Ier3	0.000120507	-0.146595	0.793	0.838	1	Shroom3	0.000205068	-0.156283	0.111	0.206	1	Pde10a	0.00689645	0.169209	0.071	0.023	1
Yju2	0.0592231	0.0802944	0.264	0.158	1	Tmem126a	0.0087623	-0.266575	0.405	0.53	1	Oscp1	0.0302318	-0.20028	0.104	0.237	1	Cdk5r1	1.39079e-05	0.191693	0.235	0.112	0.266058	Rpl36	0.0289636	0.154414	1	1	1	Pde1c	0.000123342	0.0694165	0.08	0.043	1	Armcx2	0.000205875	0.0975737	0.122	0.06	1	Memo1	0.00692144	-0.256491	0.268	0.409	1
Tacc1	0.0594006	0.170101	0.377	0.261	1	Atpif1	0.00878892	0.271785	0.911	0.911	1	Reep2	0.0302492	0.120215	0.125	0.052	1	Dgke	1.39358e-05	-0.268381	0.193	0.371	0.266592	Zscan12	0.0290362	0.0964083	0.162	0.092	1	Kif19a	0.000124259	-0.136595	0.254	0.319	1	Rrp1	0.000209697	0.159496	0.523	0.4	1	Gulp1	0.00703136	-0.144207	0.241	0.382	1
Rbmxl1	0.0594663	0.149502	0.453	0.322	1	Aldh5a1	0.00880884	0.109215	0.089	0.028	1	Ankrd37	0.0303797	-0.207327	0.104	0.241	1	Ablim1	1.39644e-05	0.154609	0.139	0.05	0.267139	Hdac11	0.0290876	0.0773805	0.081	0.037	1	Cipc	0.000124356	0.14063	0.345	0.276	1	Ccdc107	0.000210828	0.147213	0.523	0.399	1	Gnaz	0.0070535	-0.185038	0.071	0.172	1
Ciao2b	0.059484	-0.192046	0.472	0.582	1	Unk	0.00881	0.182031	0.177	0.084	1	Cmc1	0.0304118	-0.214526	0.188	0.342	1	Dera	1.40027e-05	0.152016	0.157	0.061	0.267872	Naa80	0.0290952	0.133934	0.131	0.071	1	Efnb1	0.000124479	0.0636834	0.086	0.048	1	Jam3	0.000215248	0.117993	0.16	0.089	1	Pdcd5	0.00708424	0.187251	0.946	0.88	1
Pcdh9	0.0594881	0.0661859	0.113	0.052	1	Ywhag	0.00884128	0.189759	0.329	0.199	1	Hps5	0.0306618	-0.141236	0.021	0.129	1	Nadk2	1.41312e-05	-0.31715	0.651	0.784	0.270329	Camk2d	0.0291602	-0.16569	0.98	0.999	1	U2af1	0.000124615	0.107502	0.951	0.938	1	Cdk6	0.000215784	0.109966	0.137	0.071	1	Rnf187	0.00708559	0.183546	0.705	0.59	1
Ccdc155	0.0595433	0.0339054	0.038	0.01	1	Fyn	0.00890358	0.09927	0.089	0.028	1	Selenom	0.0306802	0.104135	0.104	0.039	1	Gpm6b	1.42532e-05	-0.308372	0.639	0.774	0.272663	Timm44	0.0291638	-0.196086	0.313	0.423	1	Cuedc1	0.000125791	0.117979	0.939	0.917	1	Ddx58	0.000215855	0.0399079	0.034	0.008	1	Usp39	0.00710178	0.172857	0.188	0.1	1
Tm2d2	0.0596831	0.158575	0.698	0.579	1	Smpdl3a	0.00897587	0.109215	0.089	0.028	1	Ezh1	0.0306944	0.198218	0.271	0.154	1	Gadd45g	1.45398e-05	0.183377	0.108	0.034	0.278147	Zswim7	0.0291703	-0.117671	0.051	0.124	1	Snx17	0.000127014	0.115954	0.324	0.25	1	Afdn	0.000217225	0.173344	0.313	0.218	1	Mbtd1	0.0071262	0.2224	0.598	0.457	1
Pfdn1	0.0598369	0.144272	0.811	0.708	1	Rbm24	0.00900061	0.203056	0.241	0.131	1	Rgr	0.0307313	0.193389	0.125	0.052	1	Got1	1.46283e-05	-0.332336	0.518	0.647	0.27984	Plag1	0.0293241	-0.122419	0.131	0.231	1	Adam22	0.000127671	0.0740623	0.082	0.045	1	Adam23	0.000217302	0.0410719	0.042	0.012	1	Pfkfb4	0.00713205	-0.163227	0.018	0.093	1
1600012H06Rik	0.0598811	-0.159191	0.094	0.197	1	Ndufa11	0.0090181	-0.215989	0.899	0.956	1	Gclc	0.030776	0.175641	0.167	0.079	1	Ube2h	1.51477e-05	0.287577	0.488	0.334	0.289775	Abcf1	0.0293332	-0.190131	0.747	0.803	1	Slc38a1	0.000132668	0.13611	0.554	0.492	1	Wdr1	0.000217349	0.118492	0.24	0.151	1	Hint1	0.00714703	0.156598	0.991	0.975	1
Ube3b	0.0600307	0.111168	0.245	0.147	1	Kyat1	0.00905035	0.096218	0.114	0.042	1	Sap18b	0.0308636	0.0902294	0.062	0.018	1	Naa38	1.51592e-05	-0.302824	0.524	0.668	0.289995	Slc49a4	0.0293536	0.131331	0.162	0.094	1	Slc25a5	0.000133462	-0.117075	0.988	0.996	1	Mturn	0.000220277	0.0999253	0.122	0.061	1	Sap30l	0.00715398	0.220239	0.562	0.392	1
Zfp672	0.0601432	0.129635	0.208	0.121	1	Fnbp1	0.00905035	0.096218	0.114	0.042	1	Nckap5l	0.0308636	0.0902294	0.062	0.018	1	Dach1	1.54381e-05	-0.297465	0.157	0.319	0.29533	Syngr3	0.0293664	0.0627798	0.121	0.063	1	Gtf3c6	0.000135795	0.0940332	0.361	0.28	1	Lipe	0.000222616	0.0611941	0.065	0.024	1	Sar1b	0.00717116	-0.150903	0.696	0.812	1
Etaa1	0.0603592	0.191335	0.189	0.109	1	Rpf1	0.00911002	0.222854	0.392	0.255	1	Tm7sf3	0.0308677	0.203454	0.333	0.207	1	Polr3d	1.54851e-05	0.188034	0.259	0.129	0.296229	Slc36a1	0.0294053	0.0828666	0.121	0.064	1	Rufy3	0.000135861	-0.102495	0.963	0.977	1	Ppp1r16b	0.000223714	0.0399079	0.038	0.01	1	Lrrc57	0.00718109	-0.206796	0.107	0.219	1
Nfkbib	0.0608689	-0.134633	0.038	0.123	1	Hist1h1c	0.00917657	-0.406225	0.532	0.626	1	Uap1l1	0.0308985	0.075998	0.083	0.028	1	Lrit2	1.5732e-05	-0.247695	0.096	0.245	0.300954	Fam110a	0.0295093	-0.210688	0.273	0.374	1	Idh3b	0.00013926	-0.138573	0.821	0.844	1	Slc35g1	0.000224476	0.0716843	0.069	0.026	1	Doc2b	0.00719735	-0.217443	0.143	0.258	1
Tbc1d10b	0.0609345	0.110079	0.208	0.12	1	Ncoa2	0.00918745	-0.292566	0.468	0.612	1	Yju2	0.0310389	0.177392	0.271	0.156	1	Tspyl1	1.58269e-05	0.235748	0.355	0.209	0.30277	Ilvbl	0.0295184	0.120004	0.273	0.183	1	Prpf4b	0.00013927	-0.109434	0.96	0.967	1	Arl6ip1	0.000225863	-0.215583	0.828	0.825	1	Edf1	0.00724658	0.207271	0.982	0.941	1
C330021F23Rik	0.061201	0.0915087	0.094	0.041	1	Tle1	0.00930651	0.0825913	0.089	0.028	1	Ankrd13d	0.031069	0.0747837	0.042	0.009	1	Trio	1.58644e-05	0.206366	0.247	0.124	0.303485	Ppp1r12b	0.0295619	-0.158357	0.172	0.274	1	Fam50a	0.000140167	0.107484	0.445	0.358	1	Tpt1	0.000230642	-0.138772	0.992	0.998	1	Ildr2	0.00730083	0.101581	0.107	0.043	1
Rnf138	0.0614427	-0.148766	0.057	0.148	1	Arhgap44	0.00930651	0.0825913	0.089	0.028	1	Slc7a8	0.031156	-0.260944	0.125	0.256	1	Acsl3	1.63415e-05	0.505056	0.518	0.366	0.312612	Tent4b	0.0295787	0.153725	0.475	0.364	1	Alpl	0.000141763	-0.132318	0.129	0.184	1	Klhl18	0.000236391	-0.191092	0.195	0.299	1	Pex2	0.00732443	-0.240498	0.223	0.342	1
Gm49602	0.0616739	0.136147	0.226	0.134	1	1600002K03Rik	0.0093134	0.157578	0.089	0.028	1	Sun2	0.0311587	0.0884428	0.062	0.018	1	Kdm1a	1.63641e-05	0.278917	0.687	0.54	0.313046	Armh3	0.0296071	-0.0991899	0.051	0.126	1	Slc1a2	0.000142025	0.125508	0.995	0.995	1	Hnrnpa0	0.000239287	0.184286	0.76	0.641	1	St7	0.0073304	0.107625	0.071	0.023	1
Papss1	0.0617104	-0.146606	0.113	0.224	1	Fam171a1	0.00932282	0.102848	0.114	0.042	1	Virma	0.031168	-0.201713	0.104	0.241	1	Smc6	1.67891e-05	0.275734	0.59	0.417	0.321175	Ccdc51	0.0296584	0.0918436	0.091	0.044	1	Ccdc127	0.000142688	0.0861773	0.503	0.398	1	B3gat3	0.000243692	0.130037	0.256	0.166	1	Pcsk2	0.00733495	0.37566	0.33	0.231	1
Chchd1	0.0617533	0.172082	0.83	0.718	1	Ccdc107	0.00933207	0.244572	0.886	0.827	1	Fbxw5	0.0311731	0.118286	0.229	0.12	1	Rnf115	1.69435e-05	0.277751	0.452	0.302	0.324129	Gria2	0.0297461	0.17076	0.192	0.118	1	Hist2h2be	0.000144408	0.112999	0.14	0.092	1	Myo18a	0.000244645	0.108099	0.164	0.091	1	Cyhr1	0.00733962	0.227052	0.562	0.409	1
Ccdc181	0.061761	0.214945	0.358	0.247	1	Ccdc113	0.00938254	0.0927272	0.089	0.028	1	Snx20	0.0312201	0.0742289	0.083	0.028	1	Ccpg1os	1.72143e-05	-0.255232	0.295	0.477	0.32931	Sec62	0.0297941	-0.14503	1	0.998	1	Prkab1	0.000145389	-0.18243	0.487	0.518	1	Cox7c	0.000246498	-0.147113	0.966	0.992	1	Hspb11	0.00736954	0.173314	0.571	0.409	1
Gid8	0.0618437	0.126839	0.302	0.196	1	Ndufb5	0.00944143	-0.190688	0.975	0.97	1	Tmem14c	0.0312355	-0.148163	0.229	0.405	1	Ube2b	1.72977e-05	0.3354	0.837	0.737	0.330905	Fgfr1	0.0298126	0.0737843	0.071	0.03	1	Rexo2	0.000146017	0.0567056	0.459	0.353	1	Mrtfa	0.000251766	0.0625192	0.076	0.031	1	Ppp1r14b	0.00737209	0.222516	0.696	0.622	1
Gm42531	0.0618861	0.0492311	0.019	0.003	1	Canx	0.00956147	0.204312	0.81	0.664	1	Ibtk	0.0312355	-0.174662	0.042	0.159	1	Ndufs7	1.73283e-05	-0.265436	0.801	0.898	0.33149	Mrpl18	0.0298873	-0.161249	0.535	0.629	1	Napg	0.000146096	-0.114289	0.807	0.839	1	Lbp	0.000253073	0.0210243	0.011	0.001	1	Stx19	0.0074071	-0.104697	0	0.061	1
Gng2	0.0618861	0.0752263	0.019	0.003	1	Csnk1d	0.00956747	-0.224471	0.165	0.304	1	2900089D17Rik	0.0313387	0.0729815	0.042	0.009	1	Id2	1.78916e-05	0.129016	0.06	0.012	0.342267	Vipas39	0.0298928	-0.19714	0.141	0.228	1	Bola3	0.000146357	0.0901934	0.58	0.479	1	Pnoc	0.000253073	0.0210243	0.011	0.001	1	Apoe	0.00742582	0.363342	0.893	0.814	1
Slc16a8	0.0618861	0.0752263	0.019	0.003	1	Ccl19	0.00958261	0.0897629	0.114	0.042	1	Armc9	0.0313888	-0.283031	0.229	0.361	1	Add3	1.79156e-05	0.243936	0.548	0.38	0.342726	Lypla2	0.0298986	0.15289	0.374	0.272	1	Atp1b1	0.000147573	0.113603	0.178	0.124	1	Scara5	0.000253073	0.0210243	0.011	0.001	1	Nabp2	0.0074298	0.146028	0.518	0.353	1
Rcan2	0.0618861	0.0752263	0.019	0.003	1	Atp5g1	0.0095895	-0.183332	1	0.998	1	Bri3bp	0.0314946	0.169789	0.312	0.187	1	Nrtn	1.80705e-05	-0.325507	0.38	0.539	0.345688	Mier1	0.0299016	-0.148312	0.758	0.845	1	Ccdc86	0.000147832	-0.135111	0.203	0.268	1	Npas2	0.000253808	0.0155904	0.011	0.001	1	Sipa1l2	0.0074866	0.103545	0.071	0.023	1
A730006G06Rik	0.0618861	0.0492311	0.019	0.003	1	Rfx3	0.00968743	0.189062	0.291	0.173	1	Cisd1	0.0316077	-0.260607	0.917	0.903	1	Akap13	1.81616e-05	0.24682	0.331	0.192	0.347431	4930404N11Rik	0.0299822	-0.119863	0.04	0.109	1	Gpatch8	0.000149923	-0.127746	0.952	0.968	1	Gm38251	0.000253808	0.0155904	0.011	0.001	1	Mafa	0.00748749	0.137159	0.116	0.05	1
A930012L18Rik	0.0618861	0.0492311	0.019	0.003	1	Tmem38a	0.00970964	-0.208205	0.063	0.18	1	Spdl1	0.0316101	0.0711815	0.042	0.009	1	Prkacb	1.83286e-05	0.276085	0.337	0.203	0.350626	Map1b	0.030039	-0.120016	1	1	1	Arhgdib	0.000149971	0.0441156	0.035	0.013	1	Lpcat4	0.000253808	0.0155904	0.011	0.001	1	Kif1b	0.00750138	-0.227632	0.982	0.991	1
BC004004	0.061987	-0.176374	0.509	0.708	1	Zbtb24	0.00972156	-0.167414	0.051	0.161	1	2210016L21Rik	0.031744	0.304896	0.521	0.393	1	Evl	1.84616e-05	0.296854	0.458	0.31	0.35317	Vhl	0.0301552	-0.131513	0.071	0.151	1	Tsc22d3	0.000153152	0.0859323	0.136	0.088	1	Gm17096	0.000253808	0.0155904	0.011	0.001	1	Sugp2	0.00754017	-0.243804	0.295	0.419	1
Rps15	0.0620759	-0.161872	1	0.998	1	Pcbp1	0.00972224	0.24098	0.861	0.804	1	Plekha6	0.0317473	-0.127046	0	0.088	1	Ermard	1.85512e-05	0.12809	0.151	0.058	0.354884	Abraxas2	0.0302084	-0.189418	0.293	0.395	1	Tent5c	0.000153628	0.0376163	0.034	0.012	1	Kcnn3	0.000253808	0.0155904	0.011	0.001	1	Mllt11	0.00761021	0.0870792	0.312	0.183	1
Stau1	0.0622787	0.122266	0.302	0.194	1	Cox7b	0.00973031	-0.309371	0.975	0.995	1	Sgpl1	0.0318711	0.0706972	0.083	0.028	1	Tet3	1.86091e-05	-0.305649	0.699	0.798	0.355992	Aebp2	0.0302177	-0.133748	0.303	0.427	1	Wwtr1	0.000153812	0.115045	0.311	0.24	1	Gm43623	0.000253808	0.0155904	0.011	0.001	1	Ctsf	0.0076653	-0.220578	0.589	0.656	1
Sumf1	0.0623054	0.056622	0.075	0.029	1	Ergic3	0.00977984	0.184545	0.772	0.666	1	Idh3b	0.0318938	-0.24534	0.438	0.629	1	Tnr	1.88936e-05	0.0826788	0.06	0.012	0.361435	Ccdc86	0.0302247	-0.187481	0.323	0.428	1	Tmem41b	0.000155163	-0.153092	0.328	0.392	1	Piezo1	0.000253808	0.0155904	0.011	0.001	1	Zbtb9	0.00775177	0.149272	0.107	0.045	1
Shisal1	0.0623055	0.0552641	0.075	0.029	1	Zcrb1	0.00978079	-0.205913	0.734	0.883	1	Lmo1	0.0319111	-0.326843	0.479	0.583	1	Gmpr	1.90125e-05	0.0768585	0.042	0.005	0.363709	Fscn1	0.0303261	0.162672	0.273	0.185	1	Chrnb4	0.000155174	0.124445	0.737	0.649	1	Gm36198	0.000253808	0.0155904	0.011	0.001	1	Srpr	0.00776717	0.218973	0.527	0.362	1
Atp5k	0.0623736	-0.173183	1	0.996	1	Dph7	0.00978241	0.0999908	0.152	0.065	1	Herpud1	0.0320058	0.329149	0.292	0.177	1	Ndufv2	1.92419e-05	-0.280149	0.849	0.913	0.368098	Syne1	0.030382	0.229761	0.303	0.219	1	Ep400	0.00015649	0.0932098	0.556	0.45	1	Gm3896	0.000253808	0.0155904	0.011	0.001	1	Cap1	0.00777547	0.168668	0.214	0.122	1
Rbm27	0.0624475	0.129834	0.566	0.41	1	Hmgn3	0.00981613	0.152617	0.316	0.182	1	Nebl	0.0320182	0.0462146	0.042	0.009	1	Smco4	1.93248e-05	0.068638	0.042	0.005	0.369684	Eapp	0.0305184	-0.218544	0.596	0.639	1	Maf1	0.000157444	0.0954521	0.55	0.45	1	4930579C12Rik	0.000253808	0.0155904	0.011	0.001	1	Cyb5d2	0.00780304	-0.187125	0.071	0.17	1
Gm17750	0.0624879	0.118866	0.019	0.003	1	Sumo2	0.00982926	0.212287	0.987	0.986	1	Ninl	0.0320182	0.0462146	0.042	0.009	1	Tmpo	1.94004e-05	0.240209	0.488	0.321	0.37113	Fam171b	0.0305447	0.195363	0.444	0.339	1	Rock2	0.000158362	0.127341	0.974	0.967	1	Inpp5j	0.000253808	0.0155904	0.011	0.001	1	Ppp2r2c	0.00781081	0.136857	0.071	0.023	1
Ankrd33	0.0625287	-0.189149	0.396	0.54	1	Vezf1	0.00983207	0.284165	0.823	0.827	1	Cdkn2c	0.0320182	0.0462146	0.042	0.009	1	Slc19a2	1.94142e-05	0.074551	0.06	0.012	0.371393	Gpx1	0.0306908	0.144255	0.475	0.362	1	Ilkap	0.000158366	0.0914655	0.508	0.409	1	Kcnf1	0.000253808	0.0155904	0.011	0.001	1	A930001M01Rik	0.00784108	-0.186344	0.152	0.278	1
H2afv	0.0626046	0.138132	0.981	0.971	1	Hs2st1	0.00984734	0.249241	0.43	0.297	1	Gm17207	0.0320182	0.0462146	0.042	0.009	1	Fiz1	1.9504e-05	0.203623	0.337	0.194	0.373111	Bclaf3	0.0307381	0.0801441	0.202	0.123	1	Timm13	0.00015975	0.0901215	0.966	0.96	1	Dbpht2	0.000253808	0.0155904	0.011	0.001	1	Gm15559	0.00788756	0.0764521	0.054	0.014	1
Swsap1	0.0626409	0.0861405	0.094	0.041	1	Rnf150	0.00994737	0.217809	0.405	0.259	1	Zfp976	0.0320182	0.0462146	0.042	0.009	1	Stx7	1.95907e-05	0.242282	0.337	0.196	0.374769	Rhoc	0.0307472	0.109718	0.182	0.108	1	Six3os1	0.000161167	0.099506	0.221	0.158	1	Zdhhc22	0.000253808	0.0155904	0.011	0.001	1	Cox7b	0.00790444	-0.225109	1	1	1
Gm38336	0.0627901	0.0227589	0.019	0.003	1	Ftl1	0.00998466	0.194895	1	1	1	Snx22	0.0320182	0.0462146	0.042	0.009	1	Cltrn	1.96418e-05	0.068638	0.042	0.005	0.375747	Csnk1g3	0.0307583	-0.219218	0.404	0.5	1	P3h4	0.000161416	0.0645639	0.143	0.092	1	Hs3st6	0.000253808	0.0155904	0.011	0.001	1	Kcne2	0.0079138	0.0833448	0.054	0.014	1
Prss56	0.0627901	0.0227589	0.019	0.003	1	Prxl2a	0.0100364	0.237872	0.481	0.343	1	Rmst	0.0320182	0.0462146	0.042	0.009	1	Sash1	1.98444e-05	0.165899	0.175	0.073	0.379623	Akr1e1	0.0309371	-0.168636	0.222	0.333	1	Rpl21	0.000162996	0.0820479	1	0.999	1	Grm4	0.000253808	0.0155904	0.011	0.001	1	Grb10	0.0079479	0.214269	0.161	0.082	1
Dnajb3	0.0627901	0.0227589	0.019	0.003	1	H1fx	0.0100407	0.246638	0.241	0.129	1	A430108G06Rik	0.0320182	0.0462146	0.042	0.009	1	Plxnb2	1.99893e-05	0.178867	0.271	0.14	0.382395	Ksr2	0.0310462	-0.0721498	0	0.045	1	Csnk1g3	0.000165912	0.106905	0.472	0.377	1	Uts2	0.00025469	0.153468	0.065	0.024	1	Psmg4	0.00797688	0.188892	0.562	0.425	1
Fam72a	0.0627901	0.0227589	0.019	0.003	1	Sec22a	0.0101271	-0.251024	0.367	0.505	1	Wdr25	0.0320182	0.0462146	0.042	0.009	1	Acad10	2.0105e-05	0.0919486	0.084	0.022	0.384608	Crx	0.0311326	-0.114054	1	1	1	Ubqln2	0.000166017	0.0981047	0.532	0.428	1	Arsa	0.000255573	0.0527208	0.05	0.016	1	Abhd2	0.00798973	0.0858825	0.054	0.014	1
Lad1	0.0627901	0.0227589	0.019	0.003	1	Rai1	0.0101421	0.16778	0.165	0.077	1	A530076I17Rik	0.0320182	0.0462146	0.042	0.009	1	Nudt4	2.01892e-05	0.20369	0.259	0.135	0.386219	Gm26873	0.0312621	0.096676	0.051	0.019	1	Golt1b	0.000168331	0.145301	0.39	0.318	1	Pappa	0.000256028	0.0147558	0.011	0.001	1	Tspan31	0.00799622	0.148604	0.429	0.289	1
4930558K02Rik	0.0627901	0.0227589	0.019	0.003	1	Tasp1	0.0102192	0.118799	0.19	0.091	1	Acvrl1	0.0320182	0.0462146	0.042	0.009	1	Tmem168	2.04208e-05	0.182022	0.229	0.111	0.390649	Mmp24	0.0312656	0.057123	0.071	0.03	1	Rarb	0.000168592	0.0699359	0.117	0.072	1	Actr3	0.000257596	0.127061	0.385	0.275	1	Klhl24	0.00800009	-0.219102	0.777	0.855	1
Rbms1	0.0627901	0.0227589	0.019	0.003	1	Dap	0.0102667	0.0764987	0.101	0.035	1	Slamf1	0.0322515	0.062215	0.062	0.018	1	B4galt5	2.04261e-05	0.0505531	0.042	0.005	0.390752	Mat2a	0.0314498	-0.149461	1	0.995	1	AI429214	0.000168738	-0.103216	0.114	0.17	1	Map4k4	0.000260395	0.148189	0.405	0.294	1	Ccdc39	0.00803809	-0.165749	0.071	0.17	1
Fign	0.0627901	0.0227589	0.019	0.003	1	Usp25	0.0102711	0.178743	0.241	0.131	1	Plekhg5	0.0322952	0.0426123	0.042	0.009	1	Por	2.05249e-05	0.348585	0.452	0.307	0.392642	Smndc1	0.0315297	-0.180916	0.242	0.35	1	Thrb	0.000169174	-0.186069	0.516	0.534	1	Cyba	0.000261553	0.0513733	0.057	0.02	1	Dlg2	0.00805666	-0.276004	0.42	0.552	1
Zfp967	0.0627901	0.0227589	0.019	0.003	1	Gpm6b	0.0103161	-0.274511	0.684	0.806	1	B930059L03Rik	0.0322952	0.0426123	0.042	0.009	1	Smap2	2.14422e-05	0.195134	0.355	0.205	0.410189	Map4	0.031569	-0.217098	0.313	0.407	1	Cerk	0.000171211	-0.171266	0.301	0.361	1	Jpt2	0.000261829	0.0510767	0.05	0.016	1	Abca4	0.00806724	-0.233024	0.277	0.41	1
Zfp970	0.0627901	0.0227589	0.019	0.003	1	Cryab	0.0103695	0.227469	0.177	0.086	1	Farp1	0.0322952	0.0408146	0.042	0.009	1	Gmds	2.18137e-05	0.0875254	0.084	0.022	0.417296	Tsacc	0.0316431	-0.08092	0.051	0.125	1	Flnb	0.000171577	0.112665	0.077	0.042	1	Ugdh	0.000264979	0.099141	0.179	0.102	1	Sys1	0.00807883	-0.167327	0.973	0.987	1
Gm42941	0.0627901	0.0227589	0.019	0.003	1	Cdkn2d	0.0103872	0.169914	0.367	0.231	1	Got2	0.0323523	-0.312372	0.375	0.494	1	Ttc8	2.18858e-05	-0.330119	0.41	0.583	0.418676	Kdm4b	0.0317295	0.145169	0.263	0.18	1	Ffar4	0.000173332	0.0278275	0.018	0.004	1	A430035B10Rik	0.00026528	-0.16193	0.107	0.199	1	Arpc5l	0.00811209	0.147672	0.518	0.357	1
Mov10	0.0627901	0.0227589	0.019	0.003	1	Arl2	0.0104463	0.165108	0.367	0.229	1	Gm43254	0.0325582	0.058644	0.062	0.018	1	Cntf	2.2031e-05	0.0559711	0.06	0.012	0.421454	Pkib	0.0318215	0.0626418	0.04	0.013	1	Nfyb	0.000175726	0.0790045	0.51	0.404	1	Zmynd19	0.000268028	0.0859967	0.115	0.056	1	Jam2	0.0081295	-0.316636	0.438	0.538	1
Sec24d	0.0627901	0.0227589	0.019	0.003	1	Taf15	0.0104986	0.161014	0.582	0.397	1	Lca5l	0.032574	0.0426123	0.042	0.009	1	Mdh2	2.22305e-05	-0.26085	0.867	0.921	0.42527	Fundc2	0.0318547	0.106504	0.566	0.42	1	Otx2os1	0.000176531	-0.159966	0.315	0.378	1	Lamtor3	0.00026834	-0.136502	0.115	0.21	1	Tmem42	0.0081441	-0.237364	0.161	0.272	1
Raver2	0.0627901	0.0227589	0.019	0.003	1	Myh10	0.0105343	0.192574	0.278	0.159	1	Gm13684	0.032574	0.0390191	0.042	0.009	1	Hist2h4	2.2285e-05	0.0708598	0.054	0.009	0.426313	6330403K07Rik	0.0318747	0.116409	0.212	0.133	1	Prps1	0.000176644	0.0820211	0.225	0.163	1	Mvb12b	0.000272007	0.0900629	0.137	0.072	1	Col11a1	0.00814484	0.096037	0.054	0.014	1
Lrp8os2	0.0627901	0.0227589	0.019	0.003	1	Nsmce4a	0.010549	0.272008	0.722	0.633	1	Pfkfb4	0.0328671	0.058644	0.062	0.018	1	Rtl6	2.25548e-05	0.1083	0.09	0.025	0.431472	Mvd	0.0319326	0.144342	0.162	0.098	1	B4galt1	0.000177572	-0.164772	0.353	0.409	1	Nisch	0.000272763	0.152068	0.691	0.55	1	Nfia	0.00815693	0.150356	0.125	0.056	1
Gm24362	0.0627901	0.0227589	0.019	0.003	1	Ran	0.0105714	0.240175	0.886	0.818	1	Rhno1	0.0329067	0.125649	0.146	0.066	1	E130308A19Rik	2.26905e-05	0.175296	0.217	0.103	0.434069	Mettl21a	0.0320214	-0.130729	0.04	0.107	1	Ndufa7	0.000178207	0.105758	1	0.994	1	Hsph1	0.000276304	0.114465	0.279	0.181	1	Rbmx	0.00816436	-0.0966601	0.205	0.353	1
Angptl7	0.0627901	0.0227589	0.019	0.003	1	Btg1	0.0105863	-0.271496	0.924	0.967	1	Setbp1	0.0329097	0.134087	0.104	0.04	1	Gm35021	2.28875e-05	0.066377	0.054	0.009	0.437838	Rab39b	0.0322085	0.139725	0.293	0.204	1	Lage3	0.000180986	0.0635013	0.437	0.338	1	Arhgef7	0.000279413	0.11182	0.237	0.148	1	Ttc30b	0.00816779	-0.17212	0.045	0.133	1
Adra2c	0.0627901	0.0227589	0.019	0.003	1	Nfkbil1	0.0105871	0.137494	0.329	0.194	1	Nrtn	0.0330309	-0.296317	0.354	0.497	1	Tkt	2.2969e-05	0.252594	0.434	0.28	0.439396	Tlcd1	0.0322169	0.0604359	0.04	0.013	1	Mtfr1	0.000181714	-0.157694	0.367	0.431	1	Tmem131	0.000280003	0.101404	0.202	0.12	1	Atp6v1f	0.00818555	0.155074	0.955	0.935	1
Myo1h	0.0627901	0.0227589	0.019	0.003	1	Akap17b	0.0106563	0.174026	0.152	0.068	1	Mdh2	0.033111	-0.272233	0.812	0.918	1	Kcnk9	2.31786e-05	0.0731535	0.03	0.002	0.443407	Cplx2	0.03222	-0.203252	0.828	0.871	1	Naxe	0.000181992	0.0910232	0.542	0.438	1	A830018L16Rik	0.00028262	0.0109711	0.008	0	1	Kcmf1	0.00818788	0.151429	0.545	0.382	1
Gm43604	0.0627901	0.0227589	0.019	0.003	1	Cenpv	0.0107823	0.190496	0.215	0.112	1	4632404H12Rik	0.0331451	-0.135352	0	0.087	1	Fchsd1	2.32376e-05	0.0656355	0.048	0.007	0.444536	Cacna1d	0.0323073	0.0996058	0.091	0.044	1	Aurkaip1	0.00018258	0.120356	0.712	0.652	1	Gm16894	0.00028262	0.0109711	0.008	0	1	Ssu72	0.00820031	-0.227634	0.991	0.987	1
Gm16121	0.0627901	0.0227589	0.019	0.003	1	Npm1	0.0107888	0.173434	0.924	0.86	1	Ocel1	0.0331617	-0.157658	0.021	0.122	1	Rnasel	2.33749e-05	0.0482071	0.03	0.002	0.447162	Snx33	0.0323492	0.056034	0.051	0.019	1	Mtss1	0.000183923	0.111583	0.171	0.118	1	Gm38039	0.00028262	0.0109711	0.008	0	1	Atp2c1	0.00820538	-0.375111	0.455	0.498	1
Foxp2	0.0627901	0.0227589	0.019	0.003	1	Nfib	0.0108641	0.256694	0.127	0.051	1	H2-D1	0.0332324	0.216749	0.333	0.212	1	Gm4792	2.33749e-05	0.0482071	0.03	0.002	0.447162	Frmpd1	0.0323618	0.0463726	0.081	0.037	1	Faf2	0.000184022	0.0850416	0.533	0.433	1	Gm37107	0.00028262	0.0109711	0.008	0	1	Pcmtd2	0.0082137	-0.189834	0.92	0.934	1
Gm38804	0.0627901	0.0227589	0.019	0.003	1	AI847159	0.0109233	0.296416	0.658	0.582	1	Ttc7	0.0332395	0.149855	0.083	0.029	1	Gabrg3	2.35724e-05	0.0397949	0.03	0.002	0.450941	Bms1	0.0324151	0.147731	0.333	0.242	1	Pacsin1	0.000185602	0.141725	0.309	0.243	1	Slc2a6	0.00028262	0.0109711	0.008	0	1	Ckmt1	0.00822654	-0.259644	0.188	0.303	1
Cpne9	0.0627901	0.0227589	0.019	0.003	1	Mrps25	0.0109243	0.120309	0.506	0.336	1	Pitpnm3	0.0334681	-0.20361	0.417	0.559	1	Rab40b	2.35724e-05	0.0397949	0.03	0.002	0.450941	Mipep	0.0324948	-0.108877	0.051	0.123	1	Mif	0.000186762	0.132287	0.907	0.882	1	Fgf7	0.00028262	0.0109711	0.008	0	1	Tspan15	0.00824039	0.15572	0.357	0.231	1
Hcst	0.0627901	0.0227589	0.019	0.003	1	Mmadhc	0.0109531	0.178768	0.405	0.262	1	Mgrn1	0.0334733	-0.181834	0.042	0.153	1	Cage1	2.35724e-05	0.0397949	0.03	0.002	0.450941	Prss35	0.0325631	0.0549357	0.051	0.019	1	Hras	0.000188528	0.0915196	0.561	0.464	1	Dok5	0.00028262	0.0109711	0.008	0	1	Plxna3	0.00827603	0.0901568	0.054	0.014	1
Gm45187	0.0627901	0.0227589	0.019	0.003	1	Baz2a	0.0109965	0.201246	0.557	0.416	1	Slc25a5	0.0335028	-0.2435	0.958	0.938	1	Nfam1	2.35724e-05	0.0397949	0.03	0.002	0.450941	Fut11	0.0325736	-0.136466	0.071	0.148	1	mt-Nd1	0.000192992	0.100525	1	1	1	P2ry13	0.00028262	0.0109711	0.008	0	1	Atp5b	0.00827774	-0.134502	1	1	1
Olfr472	0.0627901	0.0227589	0.019	0.003	1	Hcn1	0.0110248	-0.245889	0.785	0.883	1	Dop1a	0.0335828	0.255703	0.438	0.299	1	Zfp57	2.35724e-05	0.0397949	0.03	0.002	0.450941	Dpp6	0.0326116	-0.0817146	0	0.044	1	Rnd1	0.000195922	0.052314	0.028	0.009	1	1700013F07Rik	0.00028262	0.0109711	0.008	0	1	Tax1bp3	0.00833211	0.134928	0.134	0.063	1
9130019O22Rik	0.0627901	0.0227589	0.019	0.003	1	2410002F23Rik	0.0110319	0.139028	0.241	0.129	1	Zfp207	0.0336128	0.190787	0.479	0.332	1	Amot	2.35724e-05	0.0397949	0.03	0.002	0.450941	Map3k5	0.0326645	0.048836	0.04	0.013	1	Psmd14	0.000197412	0.0985189	0.506	0.419	1	Gm12999	0.00028262	0.0109711	0.008	0	1	Gtf3c3	0.00835235	-0.118449	0.134	0.258	1
Chrna6	0.0627901	0.0227589	0.019	0.003	1	Tspan9	0.0110402	0.150805	0.241	0.131	1	Sh3bgrl3	0.0336565	0.125286	0.479	0.311	1	Zfp704	2.36375e-05	0.188289	0.271	0.14	0.452185	D3Ertd751e	0.0326779	-0.191523	0.263	0.368	1	Nipbl	0.000198133	-0.118079	0.969	0.983	1	Gm43577	0.00028262	0.0109711	0.008	0	1	Pole4	0.00835401	0.194282	0.259	0.158	1
Gm47772	0.0627901	0.0227589	0.019	0.003	1	Fam184a	0.0111039	0.293756	0.241	0.14	1	Fmc1	0.0337588	-0.254739	0.542	0.707	1	St7	2.37117e-05	0.0573679	0.048	0.007	0.453605	1600020E01Rik	0.0326848	0.10188	0.273	0.182	1	Slc38a2	0.000199384	0.183838	0.931	0.919	1	Gm10471	0.00028262	0.0109711	0.008	0	1	Dnttip2	0.00836891	-0.208325	0.848	0.885	1
1700110K17Rik	0.0627901	0.0227589	0.019	0.003	1	6430590A07Rik	0.0111063	0.183338	0.38	0.243	1	Ttc3	0.0340515	0.288785	0.792	0.678	1	Myl6	2.40449e-05	0.277601	0.97	0.939	0.459979	Huwe1	0.0327214	-0.180008	0.889	0.928	1	Aldoa	0.000200122	-0.102563	1	1	1	Acacb	0.00028262	0.0109711	0.008	0	1	Uba1	0.00837375	0.20726	0.821	0.728	1
Sorl1	0.0627901	0.0227589	0.019	0.003	1	Mbd5	0.0111132	0.186147	0.253	0.143	1	Slc4a7	0.034061	-0.308135	0.812	0.899	1	Gfra2	2.40771e-05	0.0382882	0.03	0.002	0.460594	Cmip	0.0327422	0.128998	0.263	0.176	1	Exosc5	0.000200395	0.0921284	0.259	0.194	1	Gm15402	0.00028262	0.0109711	0.008	0	1	Crot	0.00839688	0.237332	0.205	0.115	1
Rpp25	0.0627901	0.0227589	0.019	0.003	1	Zc3h7b	0.0111269	0.131729	0.342	0.203	1	Pofut1	0.034102	0.105965	0.188	0.092	1	Ckmt1	2.43504e-05	-0.222564	0.048	0.176	0.465822	Mest	0.0327807	0.201086	0.364	0.273	1	Sv2a	0.000202597	0.120037	0.499	0.41	1	Hrh1	0.00028262	0.0109711	0.008	0	1	Enah	0.00840039	-0.169489	0.884	0.944	1
Amigo3	0.0627901	0.0227589	0.019	0.003	1	Ctnnb1	0.0111619	0.162533	0.696	0.514	1	Pdik1l	0.0341619	0.184412	0.271	0.156	1	Trim28	2.44302e-05	0.218566	0.53	0.366	0.46735	C1qbp	0.0328446	0.198833	0.485	0.394	1	Ccdc187	0.000203826	-0.0718791	0.079	0.128	1	Gm15927	0.00028262	0.0109711	0.008	0	1	Laptm4b	0.00840933	-0.220452	0.92	0.95	1
Ctdspl	0.0627901	0.0227589	0.019	0.003	1	Mtfr1	0.0111788	-0.259999	0.392	0.533	1	Gamt	0.0342362	0.178637	0.229	0.125	1	Prxl2b	2.51766e-05	0.285333	0.319	0.186	0.481628	Ypel4	0.0328662	0.0477326	0.04	0.013	1	Farp1	0.000207787	0.0595815	0.048	0.021	1	Gm45591	0.00028262	0.0109711	0.008	0	1	Epb41l1	0.00842182	0.0868534	0.08	0.029	1
1700120B22Rik	0.0627901	0.0227589	0.019	0.003	1	Eif1ad	0.0112489	0.203361	0.494	0.353	1	Prom1	0.0344311	-0.258553	0.792	0.879	1	Pnpla8	2.53233e-05	0.265174	0.386	0.242	0.484435	Gm30054	0.0328662	0.0477326	0.04	0.013	1	Grb2	0.000208603	0.0966055	0.371	0.288	1	D7Ertd443e	0.00028262	0.0109711	0.008	0	1	Eif5a	0.00843099	0.168523	0.955	0.896	1
Gm16105	0.0627901	0.0227589	0.019	0.003	1	Ppp2r5b	0.0112553	0.14818	0.228	0.121	1	Pfkfb2	0.0345536	-0.130374	0	0.086	1	Meis2	2.56006e-05	-0.27032	0.337	0.538	0.48974	Cyfip1	0.0329015	0.114631	0.323	0.224	1	Ssbp2	0.000208927	-0.106838	0.932	0.934	1	Gm16201	0.00028262	0.0109711	0.008	0	1	Rpl7	0.00845133	0.141225	1	0.998	1
Gm4792	0.0627901	0.0227589	0.019	0.003	1	Mpdz	0.0113016	-0.226893	0.139	0.273	1	Slc35b2	0.0348374	0.136011	0.188	0.095	1	Kmt2a	2.56471e-05	0.304901	0.488	0.337	0.490629	Hectd3	0.0329515	-0.149616	0.081	0.159	1	Maff	0.000210844	0.0252288	0.02	0.005	1	2210011C24Rik	0.00028262	0.0109711	0.008	0	1	Tln1	0.00846269	0.107313	0.509	0.339	1
Gm11944	0.0627901	0.0227589	0.019	0.003	1	Grk1	0.0113101	-0.318249	0.266	0.388	1	Pno1	0.0348563	-0.21682	0.125	0.261	1	Tub	2.57231e-05	-0.303974	0.205	0.365	0.492083	Onecut2	0.0330361	0.18625	0.465	0.345	1	Upf3a	0.000213501	0.0833604	0.582	0.471	1	Gm48740	0.00028262	0.0109711	0.008	0	1	Tnk2	0.00855782	-0.134572	0.089	0.199	1
Vwc2	0.0627901	0.0227589	0.019	0.003	1	Coro2b	0.0113394	0.0923942	0.228	0.117	1	Gcc1	0.0348565	0.109359	0.104	0.04	1	Pgc	2.65324e-05	-0.263155	0.006	0.109	0.507565	Hif3a	0.033069	0.0466301	0.04	0.013	1	Gm14488	0.000215012	0.0364856	0.027	0.008	1	Plet1	0.00028262	0.0109711	0.008	0	1	Ap1s2	0.00861455	-0.235775	0.259	0.385	1
N4bp3	0.0627901	0.0227589	0.019	0.003	1	Sorbs2	0.0113504	0.184345	0.316	0.192	1	Skil	0.0348832	0.199679	0.625	0.472	1	Psmd13	2.65674e-05	0.238523	0.524	0.359	0.508235	2810442N19Rik	0.0331165	0.0371062	0.04	0.013	1	Zfp579	0.000217894	0.113112	0.322	0.25	1	Entpd3	0.00028262	0.0109711	0.008	0	1	Prr14	0.00861631	-0.211721	0.304	0.443	1
Gm16075	0.0627901	0.0227589	0.019	0.003	1	Lemd2	0.0113644	0.184145	0.304	0.185	1	Tceal9	0.034976	-0.316974	0.458	0.603	1	Supt6	2.67284e-05	0.286086	0.572	0.42	0.511314	Sertad2	0.0331533	0.165942	0.394	0.298	1	St13	0.000219334	-0.114033	0.986	0.992	1	Mfsd4b1	0.00028262	0.0109711	0.008	0	1	Wdr82	0.00862007	0.102367	0.455	0.292	1
C130046K22Rik	0.0627901	0.0227589	0.019	0.003	1	Nrf1	0.0114031	0.162345	0.316	0.192	1	Tor1a	0.035112	-0.193251	0.104	0.237	1	Opn1sw	2.72447e-05	0.507311	0.151	0.061	0.521192	Asap2	0.0331594	0.091049	0.182	0.107	1	Myc	0.000220725	0.0328995	0.025	0.007	1	Ccdc162	0.00028262	0.0109711	0.008	0	1	Spast	0.00862056	0.154879	0.482	0.326	1
2610035D17Rik	0.0627901	0.0227589	0.019	0.003	1	Dnal1	0.0114093	-0.17544	0.127	0.264	1	Susd3	0.0351548	0.23327	0.542	0.398	1	Cbx3	2.74833e-05	0.245467	0.982	0.97	0.525756	Eif2ak3	0.033256	0.14984	0.232	0.154	1	Vps37a	0.000222681	-0.108833	0.873	0.877	1	Icosl	0.00028262	0.0109711	0.008	0	1	Rgs9	0.00865693	-0.219558	0.821	0.86	1
Stxbp6	0.0627901	0.0227589	0.019	0.003	1	Apbb1	0.0114951	0.228416	0.785	0.668	1	Hopx	0.0352155	0.206511	0.188	0.096	1	Tbc1d20	2.76162e-05	0.173592	0.416	0.252	0.528298	Btf3l4	0.0332646	-0.151596	0.091	0.171	1	Ubl5	0.000226386	0.105175	0.999	0.996	1	Aloxe3	0.00028262	0.0109711	0.008	0	1	Gstp1	0.00866627	-0.176663	0.071	0.168	1
Plek2	0.0627901	0.0227589	0.019	0.003	1	Tasor2	0.0115099	0.196678	0.291	0.173	1	Rprd2	0.0352727	0.140739	0.354	0.216	1	Mapre3	2.76196e-05	-0.288572	0.295	0.451	0.528362	Caskin1	0.0332765	0.062419	0.091	0.044	1	Timm17b	0.000229729	0.0712131	0.391	0.303	1	Slc6a4	0.00028262	0.0109711	0.008	0	1	Usp46	0.00868418	0.152304	0.223	0.127	1
Gm46367	0.0627901	0.0227589	0.019	0.003	1	Sestd1	0.0115882	0.118932	0.127	0.051	1	Cox11	0.0354083	-0.166355	0.042	0.151	1	Igsf8	2.76386e-05	0.190076	0.199	0.092	0.528727	Ktn1	0.0333445	-0.127516	0.98	0.995	1	Qk	0.000230672	-0.10548	0.672	0.716	1	Tmem100	0.00028262	0.0109711	0.008	0	1	Ank2	0.00873213	-0.20625	0.857	0.91	1
Syndig1l	0.0627901	0.0227589	0.019	0.003	1	Vcl	0.0116419	0.10936	0.127	0.051	1	Retreg2	0.0356033	-0.215453	0.271	0.427	1	Cox6b2	2.80142e-05	0.166207	0.066	0.015	0.535913	Rpl18	0.0333522	0.115227	1	0.999	1	Kcmf1	0.000232062	0.0813444	0.537	0.425	1	Gm11715	0.00028262	0.0109711	0.008	0	1	Srp72	0.00875018	0.27764	0.786	0.679	1
Gm46440	0.0627901	0.0227589	0.019	0.003	1	Cplane1	0.0116627	0.199455	0.291	0.171	1	Trak2	0.035615	-0.302729	0.479	0.612	1	Rras	2.83384e-05	0.0963854	0.078	0.02	0.542113	9330159F19Rik	0.0334007	-0.132696	0.04	0.106	1	Med13	0.000233653	-0.116355	0.848	0.876	1	Gm33016	0.00028262	0.0109711	0.008	0	1	Syt2	0.00878997	0.0420625	0.054	0.014	1
Gm3739	0.0627901	0.0227589	0.019	0.003	1	Gm19938	0.0116674	0.0957667	0.063	0.016	1	Slc25a12	0.0356972	-0.191253	0.062	0.179	1	Rap1gds1	2.83709e-05	0.198387	0.235	0.118	0.542735	D930028M14Rik	0.0334301	0.0505506	0.051	0.019	1	Cep164	0.000234448	-0.147222	0.424	0.483	1	Esr2	0.00028262	0.0109711	0.008	0	1	Mfap3	0.00880095	-0.315172	0.188	0.297	1
Cfap70	0.0627901	0.0227589	0.019	0.003	1	Morf4l1	0.0116783	0.230608	0.899	0.904	1	Mapre2	0.0358937	-0.231014	0.188	0.327	1	Zfp664	2.86057e-05	0.298605	0.518	0.371	0.547226	Kif16b	0.0335257	-0.112008	0.02	0.078	1	Rgs22	0.000234531	-0.0911594	0.071	0.116	1	9530018F02Rik	0.00028262	0.0109711	0.008	0	1	Adrb1	0.00881748	0.361226	0.205	0.122	1
Pnp2	0.0627901	0.0227589	0.019	0.003	1	Tmem185a	0.0117009	-0.238617	0.241	0.383	1	Tmem65	0.0360724	0.102397	0.104	0.04	1	Lrit1	2.86232e-05	-0.325831	0.325	0.487	0.547562	Pa2g4	0.0335777	-0.234889	0.313	0.409	1	C230057A21Rik	0.000235027	-0.0537408	0.016	0.043	1	Plek2	0.00028262	0.0109711	0.008	0	1	Cdhr1	0.00884997	-0.244503	0.973	0.991	1
Slc39a2	0.0627901	0.0227589	0.019	0.003	1	Fzd3	0.0117202	0.0788928	0.063	0.016	1	Usp53	0.0364342	0.171233	0.271	0.159	1	Dact3	2.86723e-05	0.188843	0.223	0.108	0.548502	Phactr1	0.0335979	-0.13545	0.909	0.913	1	Scmh1	0.000236769	-0.144592	0.313	0.377	1	Hist1h2ag	0.00028262	0.0109711	0.008	0	1	Gclm	0.0089325	0.227367	0.518	0.376	1
Gm16029	0.0627901	0.0227589	0.019	0.003	1	Pcdhb21	0.0117202	0.0788928	0.063	0.016	1	Tshz1	0.0367278	0.188234	0.125	0.055	1	Txn2	2.87834e-05	-0.316985	0.452	0.597	0.550626	C1qa	0.03372	0.0752336	0.081	0.037	1	Wdr60	0.000239709	-0.158021	0.672	0.674	1	Cmya5	0.00028262	0.0109711	0.008	0	1	Ube2v1	0.00906729	0.185836	0.732	0.611	1
Sybu	0.0627901	0.0227589	0.019	0.003	1	Eno1	0.0117212	-0.333898	0.772	0.853	1	Pex7	0.0371052	-0.228047	0.208	0.354	1	Tbc1d30	2.8832e-05	-0.223449	0.042	0.165	0.551556	Cnot10	0.0337263	-0.184682	0.273	0.372	1	Acbd3	0.000241832	0.0990626	0.557	0.449	1	Gm33447	0.00028262	0.0109711	0.008	0	1	Gm35835	0.00913192	0.0701264	0.027	0.004	1
Tmem249	0.0627901	0.0227589	0.019	0.003	1	Tmem94	0.0117546	0.142503	0.215	0.112	1	Top1mt	0.037289	0.0877937	0.146	0.066	1	Wsb1	2.93501e-05	0.202389	0.277	0.149	0.561467	Lix1	0.0337328	0.0337934	0.04	0.013	1	Cyb5r1	0.000242723	0.130481	0.227	0.168	1	Gm48239	0.00028262	0.0109711	0.008	0	1	Gal	0.00913192	0.0701264	0.027	0.004	1
Pnpla3	0.0627901	0.0227589	0.019	0.003	1	Snrpa	0.0117554	0.140234	0.329	0.196	1	Fam162a	0.0372949	-0.24362	0.375	0.527	1	Akap8l	3.00246e-05	0.338762	0.608	0.469	0.57437	Pias1	0.0337985	-0.204811	0.434	0.543	1	Ppib	0.000243832	-0.111571	0.995	0.998	1	Sh2d4b	0.00028262	0.0109711	0.008	0	1	Slc6a1	0.00914659	0.121855	0.348	0.224	1
Gm10545	0.0627901	0.0227589	0.019	0.003	1	Llgl2	0.0117797	-0.260871	0.392	0.521	1	Mrpl51	0.0373085	-0.21913	0.542	0.675	1	Dync1i2	3.0505e-05	-0.267554	0.97	0.979	0.583561	Nudt21	0.0338609	-0.189737	0.566	0.643	1	Tulp4	0.000244614	-0.133493	0.715	0.74	1	Defb42	0.00028262	0.0109711	0.008	0	1	Arhgap31	0.00917056	-0.211852	0.705	0.753	1
Gm38097	0.0627901	0.0227589	0.019	0.003	1	Cisd1	0.0117815	-0.215355	0.911	0.897	1	Mapk8ip1	0.0374211	0.176224	0.312	0.193	1	Kmt5b	3.08279e-05	0.282691	0.53	0.381	0.589738	Ahcyl1	0.0338641	-0.194507	0.879	0.859	1	Upp2	0.000244693	0.0565744	0.065	0.033	1	A730060N03Rik	0.00028262	0.0109711	0.008	0	1	Bag6	0.0091768	0.221038	0.509	0.373	1
Cfap53	0.0627901	0.0227589	0.019	0.003	1	Cgn	0.0118229	0.0651321	0.063	0.016	1	Ppp3ca	0.0375169	0.26805	0.854	0.828	1	Csk	3.09495e-05	0.17382	0.217	0.104	0.592063	Metap1	0.0338642	0.177787	0.253	0.178	1	Rgs9bp	0.000244938	-0.13406	0.199	0.26	1	1700027A07Rik	0.00028262	0.0109711	0.008	0	1	Isoc1	0.00917764	0.13771	0.188	0.1	1
Olfr1459	0.0627901	0.0227589	0.019	0.003	1	Kctd12	0.0118637	0.125198	0.127	0.051	1	Isg20l2	0.0375423	-0.12204	0	0.083	1	Dbn1	3.1273e-05	0.143554	0.151	0.06	0.598252	Zfp428	0.0338648	0.199001	0.545	0.444	1	Cntfr	0.000245545	0.0773006	0.102	0.062	1	Gm41414	0.00028262	0.0109711	0.008	0	1	Trim28	0.00921317	0.267857	0.688	0.579	1
Aff2	0.0627901	0.0227589	0.019	0.003	1	Vma21	0.0118717	0.174175	0.494	0.341	1	Wdr36	0.0375465	-0.151253	0.021	0.119	1	Ikzf5	3.1886e-05	0.256013	0.518	0.356	0.60998	Trf	0.0339402	0.0326909	0.04	0.013	1	Klf10	0.000246247	0.184185	0.421	0.358	1	Daam2	0.00028262	0.0109711	0.008	0	1	Eprs	0.00922117	0.372937	0.929	0.882	1
Slc7a3	0.0627901	0.0227589	0.019	0.003	1	D130020L05Rik	0.0119493	0.153893	0.114	0.044	1	Mrps34	0.0375821	0.221201	0.542	0.414	1	Gm10561	3.2293e-05	0.02584	0.018	0	0.617766	Sybu	0.0339402	0.0326909	0.04	0.013	1	Ube2q1	0.000249718	0.0766954	0.512	0.407	1	Gm49871	0.00028262	0.0109711	0.008	0	1	Trub2	0.0092229	-0.137144	0.045	0.133	1
Zfp758	0.0628494	0.0714802	0.113	0.053	1	Tspan5	0.0120076	0.190376	0.418	0.273	1	Fahd1	0.0376078	-0.200252	0.083	0.204	1	Gm29017	3.2293e-05	0.02584	0.018	0	0.617766	Mmut	0.0339539	-0.102579	0.121	0.213	1	Gstp1	0.000250397	0.116675	0.222	0.165	1	Ston1	0.00028262	0.0109711	0.008	0	1	Fzd7	0.00922789	0.0578481	0.027	0.004	1
Ppp5c	0.0628974	0.161544	0.358	0.252	1	Phf10	0.0120305	0.283358	0.342	0.215	1	Nub1	0.0377024	-0.287118	0.292	0.416	1	1700056E22Rik	3.2293e-05	0.02584	0.018	0	0.617766	Unc80	0.0340356	-0.224564	0.697	0.718	1	Strbp	0.00025136	-0.104016	0.959	0.97	1	Dagla	0.00028262	0.0109711	0.008	0	1	Cgref1	0.00922789	0.0578481	0.027	0.004	1
Gsta3	0.0630943	0.0213589	0.019	0.003	1	Tubgcp2	0.0120825	0.154752	0.291	0.171	1	2310009A05Rik	0.0380101	0.305872	0.542	0.431	1	Ptprj	3.2293e-05	0.02584	0.018	0	0.617766	C130071C03Rik	0.0341036	0.134442	0.242	0.159	1	Rpl7a	0.000252667	0.0858652	0.999	0.994	1	Adgrg2	0.00028262	0.0109711	0.008	0	1	Gm44167	0.00922789	0.0454644	0.027	0.004	1
Pde5a	0.0630943	0.0213589	0.019	0.003	1	Ticam1	0.0120938	0.0618193	0.063	0.016	1	Usp19	0.0382043	-0.219214	0.292	0.462	1	Scrt2	3.2293e-05	0.02584	0.018	0	0.617766	Ap2a2	0.0342387	-0.15339	0.909	0.951	1	Selenow	0.000252776	0.0899099	0.993	0.99	1	Wfdc10	0.000282621	0.0218594	0.008	0	1	Slc16a10	0.00922789	0.0454644	0.027	0.004	1
Pax5	0.0630943	0.0213589	0.019	0.003	1	Cyp46a1	0.0121731	-0.110282	0	0.075	1	Cfap97	0.0383683	-0.243292	0.292	0.467	1	Arap2	3.2293e-05	0.02584	0.018	0	0.617766	Gucy1a2	0.0343724	0.0748662	0.071	0.031	1	Cdc42ep3	0.000256436	-0.150375	0.377	0.441	1	Gm45869	0.000282621	0.0164255	0.008	0	1	Gprc5c	0.00922789	0.0454644	0.027	0.004	1
Tmem52	0.0630943	0.0213589	0.019	0.003	1	Cbx3	0.0121792	0.185299	0.975	0.977	1	Clock	0.0384764	-0.264218	0.271	0.409	1	Cadps2	3.2293e-05	0.02584	0.018	0	0.617766	Tmem14c	0.0343763	0.101583	0.404	0.286	1	Dennd1b	0.000256514	-0.16256	0.322	0.377	1	Thap8	0.000282621	0.0218594	0.008	0	1	Fbln1	0.00922789	0.0454644	0.027	0.004	1
[truncated: 19,107 more rows]

## Sheet: Gene expression-Experiment 1
	p_val	avg_log2FC	pct.1	pct.2	p_val_adj	cluster	gene
Gngt1	0	2.10477	0.997	0.62	0	Rods	Gngt1
Sag	0	1.94972	0.999	0.777	0	Rods	Sag
Rcvrn	0	1.79018	0.755	0.262	0	Rods	Rcvrn
[truncated: 11,285 more rows]

## Sheet: Cell proportions-Experiment 1
	Empty		Zic3		Pou2f1		Zic3_Pou2f1
[truncated: 12 more rows]

## Sheet: Gene expression-Experiment 2
	p_val	avg_log2FC	pct.1	pct.2	p_val_adj	cluster	gene
[truncated: 10,172 more rows]

[truncated: 1 more sheets: Cell proportions-Experiment 2]
