# Supplementary material for: Heterochronic transcription factor expression drives cone-dominant retina development in 13-lined ground squirrels
Source: bioRxiv preprint, doi:10.1101/2025.04.25.650540, version 6 (2026-01-13)
Supplement: Supplemental Table 8 [file 650540_file23.xlsx]

## Sheet: Mef2c GOF_gene expression
	p_val	avg_log2FC	pct.1	pct.2	p_val_adj	cluster		Cone-like Precursors/Rods							Average Expression for select genes
Nr2e3	0	2.07633	0.949	0.593	0	Rods			p_val	avg_log2FC	pct.1	pct.2	p_val_adj			Cones	Cone-like Precursors	Photoreceptor Precursors	Rods
Ebpl	0	2.04696	0.949	0.66	0	Rods		Rims1	0	2.14252	0.85	0.16	0		Arr3	2.62154	0.952136	0.593275	0.266031
Rho	0	2.02503	0.681	0.41	0	Rods		Speg	0	1.33606	0.811	0.097	0		Gnat2	1.89595	1.25065	0.197262	0.0918112
Rom1	0	1.78403	0.983	0.815	0	Rods		Sphkap	0	2.9508	0.811	0.189	0		Olfm1	2.20466	2.07694	1.59169	0.97624
Chrm3	0	1.73975	0.714	0.402	0	Rods		Acbd6	0	3.03601	0.993	0.153	0		Pde6c	1.95504	0.315842	0.0617953	0.0813518
Gm42418	0	1.72	1	0.999	0	Rods		Tnr	0	2.55783	0.828	0.093	0		Lbh	0.629311	0.621715	0.509657	0.38147
Samd7	0	1.61076	0.828	0.462	0	Rods		Gnat2	0	1.67185	0.826	0.06	0		Megf9	0.783819	0.636884	0.687024	0.443834
Gnb1	0	1.57193	0.98	0.895	0	Rods		Frmd3	0	2.02158	0.895	0.17	0		Sphkap	2.06406	2.38109	0.459652	0.335758
Prph2	0	1.52718	0.986	0.832	0	Rods		Hopx	0	1.62594	0.73	0.094	0		Ckb	2.54557	2.85353	2.06931	1.57852
Cnga1	0	1.50369	0.927	0.543	0	Rods		Tmem200a	0	1.70581	0.807	0.07	0		Dst	1.40912	1.60735	1.45157	0.939507
Samd11	0	1.48841	0.847	0.492	0	Rods		Jam3	0	1.1121	0.685	0.071	0		Plcl2	0.233357	0.358808	0.270637	0.092332
Gm44196	0	1.46119	0.752	0.439	0	Rods		Cltb	0	2.47007	0.996	0.395	0		Oaz1	2.59286	2.80672	2.62801	2.46502
Rp1	0	1.4327	0.998	0.931	0	Rods		Adcy2	0	2.52464	0.956	0.155	0		Scg3	1.25475	0.797812	0.539272	0.4496
Gngt1	0	1.41649	0.996	0.98	0	Rods		Mef2c	0	2.3387	0.976	0.386	0		Vtn	0.805337	0.639608	0.639372	0.322007
Aipl1	0	1.36117	0.923	0.604	0	Rods		Pdzrn4	0	1.68672	0.842	0.116	0		Ptms	2.37606	2.12422	1.46231	1.77109
Slc24a1	0	1.35938	0.698	0.324	0	Rods		Guca1a	0	2.77695	0.965	0.416	0		Rtn4	1.80434	1.94911	1.93553	1.61267
Nrl	0	1.35618	0.814	0.474	0	Rods		Mapk4	0	1.99931	0.884	0.076	0		Tpi1	1.39793	1.47574	1.44517	1.1442
Pdc	0	1.28328	0.997	0.971	0	Rods		Gm9925	0	0.808956	0.493	0.007	0		Tpt1	2.66309	2.77668	2.75966	2.5642
Prcd	0	1.27738	0.893	0.574	0	Rods		Pygm	0	1.08662	0.705	0.062	0		Cplx3	2.15986	1.63484	1.42414	1.35307
Pde6b	0	1.27057	0.85	0.576	0	Rods		Slc8a3	1.29251e-305	1.6388	0.873	0.199	3.05781e-301		Myl6	1.7252	1.76936	1.75832	1.55522
Prom1	0	1.23374	0.926	0.68	0	Rods		Ckb	2.15016e-302	1.83944	1	0.854	5.08684e-298		Ppp1cc	1.50289	1.39478	1.32069	1.19507
Sag	0	1.20183	0.999	0.996	0	Rods		Nrn1l	4.77556e-302	0.961128	0.623	0.057	1.1298e-297		Nr2e3	0.89867	0.971911	1.45874	2.32542
Ndrg1	0	1.19793	0.825	0.562	0	Rods		Dgkh	7.31489e-299	1.72829	0.884	0.237	1.73056e-294		Rom1	1.81429	1.77024	1.95562	2.63917
Cplx4	0	1.19772	0.768	0.445	0	Rods		Scg2	1.39038e-279	1.66391	0.934	0.314	3.28936e-275		Sag	3.69112	3.96646	4.08763	4.45427
Mpp4	0	1.18802	0.894	0.642	0	Rods		Cd200	1.4536e-279	0.873865	0.458	0.019	3.43893e-275		Rho	0.548049	0.564875	0.767589	1.71636
Mpped2	0	1.18633	0.846	0.654	0	Rods		Lhx4	3.84691e-277	1.16903	0.536	0.041	9.10102e-273		Nrl	0.451449	0.686721	0.880932	1.41857
Platr17	0	1.17147	0.894	0.716	0	Rods		Tmtc1	4.09481e-267	1.79153	0.691	0.109	9.68749e-263		Cnga1	0.694598	0.876305	1.56612	2.10868
Mgarp	0	1.13714	0.953	0.852	0	Rods		Gm10419	6.22295e-267	0.949776	0.57	0.056	1.47223e-262		Cngb1	0.585466	0.882856	1.28805	1.64344
Rdh12	0	1.13069	0.728	0.439	0	Rods		Galnt13	3.10572e-264	2.16923	0.991	0.699	7.34752e-260		Tjp2	0.40635	0.319036	0.399577	0.685209
Fam57b	0	1.11606	0.842	0.614	0	Rods		Efna5	6.66923e-264	1.66958	0.698	0.119	1.57781e-259		Sorbs2	1.02082	1.27934	1.30717	1.65466
Cngb1	0	1.11305	0.878	0.644	0	Rods		Nfkb1	2.18897e-262	0.932152	0.577	0.059	5.17867e-258		Hmgn1	2.85986	2.6842	2.81458	3.26212
Galnt7	0	1.10937	0.791	0.593	0	Rods		Bach2	8.69422e-259	1.19365	0.733	0.13	2.05688e-254		Rp1	2.62587	3.14449	3.51146	4.15082
Gulp1	0	1.09298	0.876	0.673	0	Rods		Acbd7	5.41111e-258	1.16503	0.704	0.123	1.28016e-253		Gnb1	1.17196	1.3383	2.04049	2.76296
Impg1	0	1.09248	0.853	0.55	0	Rods		Rp1	3.14438e-257	-1.45182	0.996	0.998	7.43898e-253		Pde6b	0.648674	0.840932	1.28643	1.75083
Gpx4	0	1.08484	0.992	0.988	0	Rods		Gnb1	4.22935e-256	-2.05535	0.781	0.971	1.00058e-251		Gngt1	3.59089	3.47038	3.45926	3.89936
Frmpd2	0	1.08451	0.56	0.221	0	Rods		Me3	7.11154e-256	0.911915	0.546	0.051	1.68245e-251		Pitpnm3	0.295576	0.30225	0.422815	0.974266
Pde6g	0	1.08427	0.989	0.912	0	Rods		Osbpl1a	5.96406e-255	1.31341	0.766	0.163	1.41098e-250		Reep6	0.437478	0.190318	0.28874	0.763213
Rcvrn	0	1.08316	0.98	0.905	0	Rods		Slc15a2	3.83196e-249	0.760447	0.414	0.017	9.06565e-245		Epb41l2	1.22407	1.70029	1.75796	2.00681
Rs1	0	1.08251	0.946	0.724	0	Rods		Olfm1	5.33707e-246	1.58797	0.976	0.556	1.26265e-241		Mmd	0.367186	0.48443	0.656433	0.89488
Rpgrip1	0	1.0797	0.964	0.766	0	Rods		Gm31752	2.20555e-245	0.64773	0.383	0.011	5.21788e-241		Dmd	3.78467	4.03721	3.96319	4.22276
Hmgn1	0	1.07559	0.994	0.992	0	Rods		Mtus2	4.54016e-244	1.21694	0.673	0.112	1.07411e-239		Crtc3	0.532075	0.570295	0.690196	0.972303
Gm26954	0	1.06247	0.815	0.616	0	Rods		Crybg3	1.92873e-240	1.20577	0.839	0.221	4.56299e-236		Nt5e	0.208958	0.412834	0.507704	0.79629
Atp8a2	0	1.05661	0.867	0.624	0	Rods		App	1.81813e-237	1.44099	0.8	0.211	4.30133e-233		Gnat1	0.172539	0.179051	0.210519	0.620918
Zfyve28	0	1.0454	0.652	0.387	0	Rods		Prickle2	2.28377e-237	1.02589	0.557	0.065	5.40294e-233		Nktr	1.31528	1.21275	1.26367	1.42825
Pitpnm3	0	1.04526	0.554	0.257	0	Rods		Scd3	2.63236e-236	0.606263	0.392	0.015	6.22763e-232		Ppef2	0.440557	0.328087	0.247519	0.55846
Tulp1	0	1.0128	0.986	0.846	0	Rods		Bag2	4.87997e-236	0.948744	0.67	0.113	1.1545e-231		Ppm1b	1.00015	0.983736	1.0844	1.16546
Plekhb1	0	0.993758	0.962	0.841	0	Rods		Setbp1	8.22877e-234	1.63354	0.972	0.519	1.94676e-229
Slc1a7	0	0.989703	0.632	0.341	0	Rods		Higd2a	4.14789e-232	1.3492	0.988	0.649	9.81309e-228
2025-03-01	0	0.986971	0.99	0.903	0	Rods		Ccdc85a	1.57272e-231	0.977517	0.459	0.035	3.72073e-227
Cadm1	0	0.972889	0.843	0.798	0	Rods		Mpp4	7.87502e-229	-1.5384	0.649	0.956	1.86307e-224
Junb	0	0.971907	0.748	0.634	0	Rods		Gm16346	3.83745e-227	0.683476	0.365	0.012	9.07864e-223
Pde8b	0	0.946687	0.852	0.667	0	Rods		Nr2e3	7.44884e-226	-1.95271	0.599	0.933	1.76225e-221
Reep6	0	0.945218	0.484	0.217	0	Rods		Rnf152	3.35944e-223	1.03502	0.601	0.089	7.94776e-219
Cdhr1	0	0.944445	0.882	0.697	0	Rods		Ebpl	2.38117e-222	-1.88346	0.654	0.937	5.63337e-218
Clu	0	0.90092	0.79	0.592	0	Rods		Mybph	1.94007e-221	1.26421	0.374	0.017	4.58982e-217
Cdk2ap2	0	0.896987	0.709	0.565	0	Rods		GFP	4.07735e-221	1.59767	0.997	0.882	9.6462e-217
Bbs9	0	0.892838	0.846	0.736	0	Rods		Cnga1	1.81781e-218	-1.77795	0.533	0.922	4.30057e-214
Lmo1	0	0.891674	0.508	0.255	0	Rods		Mcc	1.46325e-217	1.17408	0.726	0.156	3.46177e-213
Tax1bp1	0	0.884628	0.975	0.957	0	Rods		Tnnt1	6.28608e-214	1.90914	0.766	0.223	1.48716e-209
Arl6	0	0.883634	0.939	0.836	0	Rods		Fbn2	5.20926e-212	0.744186	0.365	0.017	1.23241e-207
Cerkl	0	0.876683	0.874	0.716	0	Rods		1810041L15Rik	3.9946e-211	0.631707	0.404	0.026	9.45043e-207
Tdrd7	0	0.867225	0.586	0.377	0	Rods		Cngb3	1.42677e-208	2.09813	0.704	0.173	3.37546e-204
Lsamp	0	0.86435	0.975	0.977	0	Rods		Fabp7	9.20242e-207	2.19897	0.689	0.156	2.17711e-202
Fgf2	0	0.860794	0.631	0.437	0	Rods		Nell2	1.44759e-206	0.841508	0.493	0.056	3.42471e-202
Ric8b	0	0.839921	0.667	0.516	0	Rods		Aplp1	8.36027e-206	0.651859	0.445	0.04	1.97787e-201
Ano2	0	0.838999	0.748	0.543	0	Rods		Rcvrn	6.68706e-202	-1.6795	0.904	0.978	1.58202e-197
Ankrd33	0	0.834893	0.569	0.32	0	Rods		Fgf13	2.88672e-199	1.26718	0.694	0.16	6.8294e-195
Nxnl2	0	0.833559	0.629	0.431	0	Rods		Kalrn	1.10784e-197	0.823634	0.568	0.09	2.62093e-193
Ahr	0	0.831348	0.666	0.482	0	Rods		Neurod4	3.99477e-194	1.5017	0.691	0.164	9.45083e-190
2310030A07Rik	0	0.83127	0.503	0.273	0	Rods		Fras1	5.01036e-194	0.796942	0.43	0.041	1.18535e-189
Ccdc126	0	0.82697	0.677	0.503	0	Rods		Eda	1.23815e-193	1.23178	0.429	0.042	2.92922e-189
Epb41	0	0.82398	0.979	0.951	0	Rods		Prph2	9.53308e-193	-1.09998	0.96	0.983	2.25534e-188
Gm12802	0	0.821935	0.495	0.28	0	Rods		Ablim1	1.23778e-192	1.47636	0.943	0.532	2.92835e-188
Unc119	0	0.820819	0.983	0.947	0	Rods		Rom1	3.10452e-190	-1.2536	0.943	0.971	7.34466e-186
Mlf1	0	0.819216	0.592	0.397	0	Rods		Pde3a	1.15567e-189	0.920389	0.511	0.072	2.73409e-185
Tma7	0	0.813447	0.997	0.996	0	Rods		Atp8a2	4.24199e-187	-1.44786	0.641	0.935	1.00357e-182
Ssu72	0	0.810455	0.899	0.884	0	Rods		Adssl1	2.49469e-185	0.712943	0.498	0.069	5.90193e-181
Stx3	0	0.801054	0.904	0.823	0	Rods		Nrxn3	1.44413e-184	2.03306	0.996	0.948	3.41653e-180
Uckl1os	0	0.792729	0.493	0.262	0	Rods		Farp1	2.37204e-183	1.01407	0.81	0.246	5.61176e-179
Slc4a7	0	0.787666	0.863	0.785	0	Rods		Ror1	3.53226e-181	0.99516	0.421	0.045	8.35662e-177
Rbp3	0	0.785825	0.891	0.817	0	Rods		Csmd1	4.0238e-180	0.796163	0.555	0.094	9.5195e-176
Pcsk2	0	0.776644	0.5	0.286	0	Rods		Plcl1	1.09764e-175	1.73642	0.832	0.333	2.59681e-171
A930003A15Rik	0	0.776587	0.714	0.558	0	Rods		Ptprn2	2.78151e-175	1.30371	0.975	0.639	6.5805e-171
Gm48236	0	0.773775	0.427	0.205	0	Rods		Hmgn1	2.65505e-174	-0.833767	0.999	0.989	6.28131e-170
Pmvk	0	0.769186	0.555	0.418	0	Rods		Arid5b	5.71181e-172	0.931965	0.722	0.192	1.3513e-167
Ankrd33b	0	0.746024	0.823	0.695	0	Rods		Ece1	8.97201e-172	0.523804	0.367	0.03	2.1226e-167
Lyar	0	0.742377	0.668	0.542	0	Rods		Dach1	1.70904e-171	1.25236	0.988	0.694	4.04325e-167
Agtpbp1	0	0.724332	0.971	0.93	0	Rods		4930447C04Rik	1.54801e-170	0.9154	0.607	0.127	3.66228e-166
Klhl29	0	0.71077	0.892	0.815	0	Rods		Samd11	1.33047e-169	-1.40954	0.577	0.897	3.14763e-165
Myo10	0	0.705216	0.796	0.707	0	Rods		Lrtm1	2.71794e-168	0.489222	0.309	0.017	6.4301e-164
Gm48551	0	0.702376	0.445	0.244	0	Rods		Gm48877	6.03539e-168	0.852728	0.418	0.049	1.42785e-163
Dnm3	0	0.700949	0.847	0.793	0	Rods		Eef1a2	1.14532e-166	1.17056	0.935	0.461	2.70959e-162
Cabp4	0	0.700649	0.424	0.211	0	Rods		Cerkl	3.0671e-166	-1.28151	0.764	0.943	7.25616e-162
Gnb5	0	0.698482	0.782	0.713	0	Rods		Pdc	4.77963e-166	-0.795206	1	0.994	1.13076e-161
Cst3	0	0.695819	0.973	0.97	0	Rods		Aipl1	5.13926e-166	-1.24596	0.664	0.913	1.21585e-161
Gm45716	0	0.693713	0.774	0.661	0	Rods		Khdrbs3	6.35748e-165	1.07447	0.934	0.484	1.50405e-160
Kcnb1	0	0.692335	0.89	0.808	0	Rods		Cntn3	6.7685e-162	0.788552	0.358	0.033	1.60129e-157
Fabp12	0	0.686637	0.882	0.693	0	Rods		Hspa12a	1.16966e-161	0.6	0.498	0.08	2.76719e-157
Mir124-2hg	0	0.682627	0.932	0.891	0	Rods		Gnb3	1.07055e-160	0.766755	1	0.977	2.53271e-156
Susd3	0	0.680919	0.356	0.133	0	Rods		Gm42517	1.73149e-160	0.420541	0.283	0.013	4.09635e-156
Mir124a-1hg	0	0.679476	0.941	0.921	0	Rods		Mpped2	2.41173e-160	-1.70039	0.496	0.86	5.70566e-156
Hk1	0	0.675005	0.824	0.784	0	Rods		Vipr2	3.82662e-160	0.807501	0.44	0.062	9.05302e-156
Ubap1l	0	0.673948	0.831	0.699	0	Rods		Tmem178	1.93081e-159	0.433139	0.296	0.016	4.56791e-155
Impg2	0	0.671571	0.952	0.843	0	Rods		Chrna5	5.4871e-158	0.496942	0.38	0.04	1.29814e-153
Map2	0	0.670183	0.965	0.937	0	Rods		Sox4	7.88814e-158	0.938739	0.607	0.143	1.86618e-153
Mak	0	0.669496	0.861	0.736	0	Rods		Prom1	8.72857e-157	-1.13406	0.797	0.955	2.06501e-152
Atf4	0	0.667208	0.772	0.739	0	Rods		Abcd2	1.66163e-156	0.826028	0.567	0.121	3.93109e-152
Hmgn2	0	0.664915	0.841	0.869	0	Rods		Samsn1	1.76002e-156	1.49923	0.819	0.346	4.16387e-152
Gpm6b	0	0.664626	0.837	0.819	0	Rods		Plekhb1	1.18647e-155	-0.951644	0.954	0.978	2.80694e-151
Klc3	0	0.657934	0.721	0.621	0	Rods		Grip1	3.41489e-154	1.28619	0.785	0.295	8.07894e-150
Rgs9	0	0.654901	0.945	0.838	0	Rods		Pdlim3	1.08574e-153	1.0632	0.773	0.271	2.56865e-149
Dlg4	0	0.653924	0.67	0.583	0	Rods		Adgrl3	7.86954e-152	1.21413	0.773	0.283	1.86178e-147
Cep290	0	0.653074	0.883	0.828	0	Rods		Impg1	4.5073e-151	-1.30388	0.561	0.888	1.06634e-146
Otud7b	0	0.637925	0.784	0.74	0	Rods		Cacna2d1	4.00214e-150	1.00577	0.782	0.269	9.46826e-146
Rtbdn	0	0.629505	0.862	0.729	0	Rods		Agap1	2.5563e-148	1.00158	0.916	0.484	6.0477e-144
Slc17a7	0	0.628961	0.864	0.736	0	Rods		Ppia	6.62166e-148	0.879942	0.997	0.913	1.56655e-143
Egflam	0	0.625244	0.796	0.67	0	Rods		Kcnk3	4.74574e-147	0.554263	0.442	0.067	1.12275e-142
Dpysl3	0	0.613201	0.915	0.848	0	Rods		Six6	1.62011e-146	0.777529	0.573	0.132	3.83286e-142
Plcb4	0	0.605913	0.9	0.884	0	Rods		Mgarp	1.66345e-145	-1.10243	0.845	0.95	3.93538e-141
Phactr1	0	0.601097	0.958	0.946	0	Rods		Calm1	3.95531e-144	0.947149	0.993	0.802	9.35748e-140
Casz1	0	0.59927	0.9	0.782	0	Rods		Lima1	4.96672e-144	0.649306	0.518	0.103	1.17503e-139
Agpat3	0	0.594589	0.849	0.819	0	Rods		Paqr3	6.07753e-144	0.811049	0.558	0.129	1.43782e-139
Atp1a3	0	0.583657	0.926	0.888	0	Rods		Ptprz1	4.04507e-143	0.89373	0.487	0.093	9.56982e-139
Tnpo1	0	0.581546	0.952	0.936	0	Rods		Zfp608	8.33431e-142	0.952924	0.909	0.449	1.97173e-137
Guk1	0	0.558272	0.805	0.774	0	Rods		Kctd12	4.51762e-140	0.627146	0.477	0.089	1.06878e-135
Crx	0	0.54166	0.881	0.83	0	Rods		Ptprg	4.5441e-140	0.866598	0.754	0.262	1.07504e-135
Ppp2r5c	0	0.533416	0.93	0.93	0	Rods		Slc24a1	5.0288e-139	-1.52	0.325	0.756	1.18971e-134
Map1b	0	0.5174	0.97	0.943	0	Rods		Arr3	7.64054e-139	0.98984	0.602	0.163	1.8076e-134
Ndufb8	0	0.503824	0.924	0.952	0	Rods		Dst	8.87701e-138	0.9635	0.953	0.533	2.10012e-133
2010107E04Rik	0	0.503707	0.975	0.987	0	Rods		Srl	1.88207e-137	0.414265	0.264	0.016	4.4526e-133
Rpl10a	0	0.503403	0.978	0.987	0	Rods		Gm17057	3.32637e-136	0.468455	0.32	0.032	7.86952e-132
Ldha	0	0.497539	0.983	0.952	0	Rods		Gpx4	3.93916e-135	-0.735227	0.999	0.985	9.31926e-131
Nap1l1	0	0.4872	0.962	0.968	0	Rods		Galnt7	5.5666e-135	-1.33524	0.602	0.852	1.31695e-130
H3f3b	0	0.476489	0.995	0.999	0	Rods		Dapk1	9.22344e-135	0.617408	0.464	0.086	2.18208e-130
Ubb	0	0.442402	0.989	0.997	0	Rods		Pde6b	3.93565e-134	-1.31271	0.592	0.858	9.31095e-130
Ndufa4	0	0.432233	0.987	0.995	0	Rods		Ppp2r5c	6.57975e-134	-0.932305	0.919	0.962	1.55664e-129
Cox6c	0	0.401999	0.992	0.997	0	Rods		Cngb1	2.03499e-132	-1.09729	0.657	0.88	4.81437e-128
Lhfpl3	2.7039e-306	0.90264	0.726	0.596	6.39689e-302	Rods		Slc24a2	5.31285e-131	1.02605	0.588	0.156	1.25691e-126
Pcolce	4.29746e-306	0.760856	0.439	0.245	1.01669e-301	Rods		Gulp1	2.57959e-130	-1.28328	0.725	0.931	6.10279e-126
Ush2a	1.33956e-303	0.50929	0.972	0.876	3.16913e-299	Rods		Otud7a	2.76526e-130	0.962865	0.775	0.291	6.54205e-126
Map4k3	9.8346e-303	0.665408	0.726	0.672	2.32667e-298	Rods		Enho	3.03139e-130	0.54974	0.297	0.029	7.17167e-126
Wdr17	1.71496e-300	0.631389	0.79	0.715	4.05724e-296	Rods		Col4a5	1.72708e-129	0.624816	0.362	0.051	4.08592e-125
Nfasc	3.2652e-295	0.667779	0.63	0.505	7.72482e-291	Rods		Tle3	1.98009e-128	0.38402	0.314	0.033	4.6845e-124
Sec62	9.42943e-290	0.527349	0.903	0.932	2.23081e-285	Rods		Ddit4l	3.88593e-128	0.440208	0.27	0.021	9.19334e-124
Dlg2	3.20372e-288	0.4544	0.971	0.947	7.57937e-284	Rods		Plxna4	4.7459e-126	0.790758	0.358	0.052	1.12278e-121
Snrk	3.62198e-283	0.660643	0.573	0.459	8.56889e-279	Rods		Lynx1	2.15361e-125	0.421041	0.318	0.036	5.09501e-121
Bbs5	6.47709e-283	0.673217	0.518	0.37	1.53235e-278	Rods		Zfyve28	3.0691e-125	-1.41632	0.33	0.729	7.26088e-121
Cacna2d4	1.08903e-275	0.589191	0.644	0.494	2.57644e-271	Rods		Nrp1	4.08519e-125	0.727602	0.378	0.06	9.66475e-121
Heg1	1.60362e-274	0.73176	0.545	0.388	3.79385e-270	Rods		Syne1	5.04278e-124	1.09571	0.941	0.591	1.19302e-119
Egr1	8.15225e-268	1.09533	0.673	0.574	1.92866e-263	Rods		Cadm2	8.08439e-124	-0.566246	1	1	1.9126e-119
Clstn1	4.94517e-267	0.572026	0.731	0.718	1.16993e-262	Rods		Sms	1.26168e-123	0.914549	0.856	0.409	2.98488e-119
Chgb	3.56651e-266	0.529484	0.806	0.777	8.43765e-262	Rods		Atp2b2	3.49428e-123	0.40363	0.353	0.049	8.26677e-119
Drd4	1.24305e-261	0.816181	0.348	0.164	2.94082e-257	Rods		Hist3h2a	3.85525e-123	0.550862	0.439	0.083	9.12075e-119
Ubc	1.78654e-259	0.61892	0.711	0.668	4.2266e-255	Rods		Nfasc	2.8259e-122	-1.18273	0.417	0.771	6.68552e-118
Hsbp1l1	8.32953e-257	0.657351	0.51	0.366	1.9706e-252	Rods		Gria1	4.51048e-122	0.869549	0.373	0.061	1.06709e-117
Zdhhc2	2.00833e-252	0.557419	0.8	0.734	4.7513e-248	Rods		Clca1	6.01038e-122	0.359689	0.275	0.025	1.42194e-117
Rnf207	6.54941e-251	0.552499	0.25	0.084	1.54946e-246	Rods		Slc8a1	8.22856e-122	1.23119	0.613	0.195	1.94671e-117
Tnfsf12	4.81277e-250	0.618359	0.504	0.35	1.13861e-245	Rods		Ccdc136	1.70123e-121	0.758924	0.483	0.108	4.02477e-117
Ppargc1b	2.02266e-248	0.650964	0.445	0.289	4.78521e-244	Rods		Airn	2.03039e-121	0.984269	0.754	0.293	4.80349e-117
Nfic	1.69825e-244	0.591722	0.677	0.621	4.01771e-240	Rods		Gm45716	9.91405e-119	-1.11213	0.682	0.884	2.34547e-114
Msi1	1.99656e-244	0.58659	0.684	0.647	4.72345e-240	Rods		Sorbs1	6.77601e-118	0.720753	0.682	0.227	1.60307e-113
Kank1	1.3896e-243	0.672157	0.512	0.365	3.28751e-239	Rods		Slc1a7	2.24768e-117	-1.16663	0.38	0.747	5.31755e-113
Ppp2r2b	1.11742e-239	0.472411	0.971	0.926	2.64358e-235	Rods		Epb41	2.43419e-117	-0.765786	0.979	0.989	5.75882e-113
Cox5b	2.71533e-235	0.396389	0.958	0.978	6.42393e-231	Rods		Fmn1	1.82424e-116	0.928258	0.959	0.631	4.31578e-112
Rsrp1	7.01922e-235	0.500008	0.802	0.824	1.66061e-230	Rods		Uqcc2	2.18686e-116	0.801768	0.954	0.598	5.17368e-112
Nxnl1	1.57027e-233	0.591464	0.351	0.183	3.71493e-229	Rods		Wwc1	9.57864e-116	0.821175	0.719	0.261	2.26611e-111
Kpna3	7.64762e-231	0.626426	0.695	0.69	1.80927e-226	Rods		St3gal3	2.47506e-115	0.742301	0.729	0.264	5.8555e-111
Aldoa	7.86456e-231	0.454081	0.965	0.974	1.8606e-226	Rods		Ush2a	5.10639e-113	-0.771695	0.962	0.995	1.20807e-108
Epb41l2	3.42812e-230	0.454903	0.885	0.867	8.11024e-226	Rods		2900026A02Rik	7.20689e-113	0.471165	0.342	0.052	1.705e-108
Gucy2f	7.49422e-230	0.572355	0.277	0.112	1.77298e-225	Rods		Rgs7	1.1302e-111	1.05207	0.716	0.289	2.67384e-107
Spcs2	1.72846e-229	0.500357	0.782	0.786	4.08918e-225	Rods		Tax1bp1	1.30651e-111	-0.680392	0.993	0.981	3.09094e-107
Cadm2	1.97505e-229	0.409127	1	0.999	4.67258e-225	Rods		Epha5	5.93349e-111	0.997987	0.888	0.48	1.40375e-106
Lrrc2	1.72645e-226	0.653004	0.432	0.269	4.08443e-222	Rods		Sema5b	6.55727e-111	0.633773	0.348	0.056	1.55132e-106
Nadk2	2.92323e-225	0.621544	0.592	0.516	6.91579e-221	Rods		Cplx4	7.78262e-111	-1.09193	0.558	0.819	1.84121e-106
Thrb	3.36809e-222	0.496354	0.906	0.868	7.96823e-218	Rods		Sox6	9.59083e-111	0.699536	0.392	0.075	2.269e-106
Cox4i1	1.55171e-221	0.293029	0.986	0.995	3.67104e-217	Rods		Rtl8a	1.59834e-110	0.643381	0.638	0.197	3.78135e-106
Igsf11	3.48548e-221	0.560979	0.769	0.74	8.24595e-217	Rods		Ddit4	1.20072e-109	0.724185	0.664	0.23	2.84066e-105
Ttyh2	1.3386e-219	0.601904	0.519	0.398	3.16687e-215	Rods		Pex5l	1.68616e-109	-0.99423	0.915	0.976	3.98912e-105
Zranb1	2.56415e-218	0.462142	0.793	0.814	6.06627e-214	Rods		Dock1	1.09288e-108	0.377164	0.295	0.037	2.58554e-104
Ttc8	1.72517e-216	0.540915	0.695	0.65	4.08142e-212	Rods		Ctnnd2	1.70248e-108	0.963489	0.601	0.202	4.02774e-104
Dlc1	8.65655e-216	0.6057	0.611	0.529	2.04797e-211	Rods		Hk2	1.70373e-108	0.784178	0.717	0.276	4.03069e-104
Trim2	1.78541e-211	0.601596	0.626	0.565	4.22392e-207	Rods		2025-03-01	1.79279e-108	-0.802334	0.988	0.995	4.24138e-104
Ndrg3	2.47013e-211	0.556128	0.706	0.701	5.84385e-207	Rods		Cnksr2	2.94983e-108	0.700402	0.437	0.097	6.9787e-104
Fth1	7.16084e-210	0.273646	0.995	0.997	1.69411e-205	Rods		Zeb2	6.27163e-108	0.844931	0.689	0.248	1.48374e-103
AC159282.1	2.76812e-209	0.516194	0.804	0.697	6.54882e-205	Rods		Thrb	7.09032e-108	-0.954608	0.916	0.963	1.67743e-103
Snap25	2.96114e-207	0.326858	0.985	0.98	7.00547e-203	Rods		Poc1a	1.20295e-107	0.442581	0.314	0.044	2.84593e-103
Icmt	4.09182e-206	0.58684	0.451	0.324	9.68043e-202	Rods		Gm26954	3.13834e-107	-1.13029	0.757	0.893	7.42468e-103
Ndufb9	1.24714e-205	0.350716	0.945	0.973	2.95048e-201	Rods		Nrl	5.8149e-106	-1.05583	0.571	0.807	1.37569e-101
Gucy2e	1.66512e-205	0.569526	0.46	0.324	3.93934e-201	Rods		Ssu72	9.51579e-106	-0.886871	0.894	0.931	2.25124e-101
Dmd	2.36274e-205	0.402086	0.999	0.986	5.58978e-201	Rods		Ccdc175	1.4292e-105	0.506503	0.337	0.054	3.38121e-101
Jun	3.75786e-205	0.656877	0.682	0.623	8.89035e-201	Rods		Fmnl2	1.09913e-104	0.776486	0.636	0.218	2.60033e-100
Podxl	8.19381e-205	0.587408	0.454	0.319	1.93849e-200	Rods		Nab1	5.1346e-104	0.53066	0.542	0.149	1.21474e-99
Pgk1	8.86148e-205	0.511361	0.785	0.809	2.09645e-200	Rods		Gmds	1.58055e-103	1.18212	0.811	0.413	3.73928e-99
Jam2	1.42937e-204	0.609134	0.551	0.455	3.38159e-200	Rods		Nck2	1.24981e-102	0.376573	0.292	0.039	2.95679e-98
Pex5l	1.13044e-203	0.425275	0.954	0.872	2.67439e-199	Rods		Trhde	2.62608e-102	0.791986	0.275	0.035	6.21277e-98
Pcbp2	1.6105e-203	0.329432	0.949	0.975	3.81013e-199	Rods		Ric8b	3.86545e-102	-1.10968	0.432	0.739	9.14488e-98
Atf3	2.49798e-203	0.639744	0.409	0.256	5.90972e-199	Rods		Lgr5	1.37053e-101	0.860936	0.554	0.171	3.2424e-97
Ppef2	2.98591e-203	0.556683	0.35	0.199	7.06408e-199	Rods		Calm2	2.07438e-101	0.638733	0.994	0.92	4.90757e-97
Diras2	4.39834e-202	0.545962	0.693	0.652	1.04056e-197	Rods		Dnm3	1.25056e-100	-0.969396	0.857	0.93	2.95857e-96
C2cd2l	5.67505e-201	0.563743	0.568	0.487	1.3426e-196	Rods		Sag	5.29313e-100	-0.703758	1	0.999	1.25225e-95
Atp5k	1.57202e-197	0.350516	0.977	0.989	3.71908e-193	Rods		Fam57b	8.64432e-100	-0.974369	0.645	0.838	2.04507e-95
Dyrk2	3.59756e-197	0.545985	0.641	0.614	8.51112e-193	Rods		Tnrc18	1.7687e-99	0.477498	0.436	0.102	4.18439e-95
Tub	3.10412e-193	0.571295	0.568	0.48	7.34372e-189	Rods		Hspb6	3.76511e-99	0.681818	0.769	0.322	8.9075e-95
Ptp4a3	5.8781e-193	0.386588	0.89	0.853	1.39064e-188	Rods		Parp8	2.08698e-98	0.61805	0.47	0.122	4.93738e-94
Llgl2	6.53399e-193	0.558891	0.435	0.308	1.54581e-188	Rods		Oxr1	1.26345e-97	0.889953	0.931	0.584	2.98907e-93
Cmss1	9.76833e-192	0.582207	0.672	0.661	2.31099e-187	Rods		Bub1b	1.78445e-97	0.358623	0.275	0.037	4.22166e-93
Nt5e	7.9573e-191	0.595917	0.44	0.312	1.88254e-186	Rods		Bbs9	2.63512e-97	-0.93669	0.835	0.92	6.23417e-93
Impdh1	2.70517e-189	0.470925	0.729	0.7	6.39988e-185	Rods		Thsd7a	5.23701e-97	1.1369	0.611	0.227	1.23897e-92
Rdh8	1.51581e-186	0.471873	0.274	0.129	3.5861e-182	Rods		Cplx2	3.07601e-96	0.682928	0.627	0.215	7.27722e-92
Selenbp1	4.32996e-186	0.558118	0.263	0.12	1.02438e-181	Rods		Ip6k2	8.00399e-96	0.751683	0.932	0.608	1.89358e-91
Ncoa2	6.60113e-186	0.522103	0.743	0.765	1.56169e-181	Rods		Rnf180	1.02556e-95	0.563205	0.405	0.091	2.42627e-91
Ubtd1	4.55024e-185	0.558675	0.507	0.405	1.0765e-180	Rods		Adgrb3	3.5469e-95	1.05064	0.953	0.762	8.39125e-91
Plch2	2.00095e-184	0.544867	0.378	0.243	4.73385e-180	Rods		Reep1	9.51142e-95	0.447087	0.426	0.099	2.25021e-90
Rhot1	5.77308e-183	0.495164	0.688	0.678	1.3658e-178	Rods		Npnt	1.23213e-94	0.384206	0.346	0.065	2.91498e-90
Slc7a8	8.87058e-183	0.616806	0.464	0.347	2.0986e-178	Rods		Rpl32	1.18671e-92	0.535782	1	0.958	2.80752e-88
Cox7b	4.17367e-181	0.35203	0.943	0.972	9.87406e-177	Rods		Rdh12	2.04889e-92	-0.991894	0.445	0.714	4.84727e-88
Insm1	1.30298e-179	0.590111	0.461	0.348	3.08259e-175	Rods		Csmd2	2.25288e-92	0.524515	0.386	0.085	5.32987e-88
Epas1	3.415e-179	0.537092	0.339	0.198	8.07922e-175	Rods		Plcl2	2.33458e-92	0.384443	0.296	0.046	5.52315e-88
Uqcrq	3.79988e-177	0.312078	0.971	0.986	8.98977e-173	Rods		Iqgap2	2.43486e-92	0.536033	0.314	0.056	5.76039e-88
Pcbp3	1.27881e-175	0.376254	0.922	0.926	3.02541e-171	Rods		Prcd	4.53178e-92	-0.835602	0.742	0.891	1.07213e-87
AI847159	2.45736e-175	0.538295	0.535	0.413	5.81363e-171	Rods		Lin7a	5.72932e-92	0.948451	0.486	0.148	1.35544e-87
Fam161a	3.06794e-173	0.485871	0.654	0.596	7.25814e-169	Rods		Hsph1	7.08089e-92	0.640009	0.644	0.238	1.6752e-87
Fyco1	8.50133e-173	0.415165	0.818	0.812	2.01124e-168	Rods		Nfib	9.50726e-92	1.00052	0.476	0.139	2.24923e-87
Hnrnpf	9.11959e-170	0.410796	0.813	0.846	2.15751e-165	Rods		Ube2e2	1.14823e-91	0.891627	0.862	0.48	2.71649e-87
Nrtn	1.90579e-169	0.509236	0.284	0.148	4.50872e-165	Rods		Trio	1.22739e-91	0.581232	0.658	0.244	2.90377e-87
Ppp3cc	8.52947e-169	0.527113	0.671	0.647	2.0179e-164	Rods		Dirc2	8.32301e-91	0.460908	0.449	0.115	1.96906e-86
Kif13a	1.25177e-166	0.486002	0.698	0.677	2.96144e-162	Rods		Hprt	8.48343e-91	0.692402	0.92	0.577	2.00701e-86
St3gal1	1.53639e-165	0.549528	0.364	0.236	3.63479e-161	Rods		Rps23	9.81506e-90	0.550665	0.997	0.956	2.32205e-85
Rab28	1.73769e-165	0.420408	0.747	0.774	4.11103e-161	Rods		Samd4	1.51801e-89	0.623747	0.492	0.142	3.59131e-85
Hist1h1e	6.16127e-164	0.778967	0.518	0.453	1.45763e-159	Rods		Osbpl6	1.24408e-88	0.569948	0.515	0.158	2.94324e-84
Gnaz	7.29936e-164	0.524967	0.348	0.219	1.72688e-159	Rods		Ahcyl2	8.50597e-88	0.734465	0.607	0.226	2.01234e-83
Lbhd1	1.57765e-163	0.538323	0.406	0.285	3.73241e-159	Rods		Cadm1	3.32625e-87	-1.24302	0.75	0.858	7.86924e-83
Ptms	2.07678e-163	0.311794	0.913	0.886	4.91324e-159	Rods		Bmp2k	2.05327e-85	0.621682	0.623	0.238	4.85763e-81
Pitpnc1	5.03399e-162	0.5962	0.647	0.594	1.19094e-157	Rods		Gem	5.92361e-85	0.319667	0.287	0.048	1.40141e-80
Cecr2	2.8935e-161	0.44067	0.817	0.817	6.84545e-157	Rods		Klhl33	6.74425e-85	0.462001	0.336	0.069	1.59555e-80
Lman1	4.44857e-161	0.369553	0.875	0.893	1.05244e-156	Rods		A230057D06Rik	1.0447e-84	1.11252	0.552	0.209	2.47155e-80
Synpo2	2.84191e-160	0.602625	0.509	0.39	6.72338e-156	Rods		Ntrk3	1.1231e-84	0.437868	0.321	0.062	2.65702e-80
Alpl	2.85854e-155	0.498983	0.334	0.207	6.76273e-151	Rods		Cabp5	1.29804e-84	0.60353	0.265	0.043	3.0709e-80
Desi1	3.55924e-155	0.419473	0.817	0.836	8.42046e-151	Rods		Pde8b	1.3196e-84	-0.945768	0.813	0.922	3.1219e-80
Gnat1	7.76145e-153	0.835478	0.275	0.149	1.8362e-148	Rods		Ppdpf	1.63573e-84	0.66858	0.82	0.404	3.86981e-80
Nr4a1	2.69608e-152	0.614893	0.468	0.363	6.37838e-148	Rods		Gm44196	1.68954e-84	-1.55364	0.421	0.726	3.99711e-80
Ier2	3.77593e-151	0.630237	0.51	0.413	8.9331e-147	Rods		Gngt1	1.97555e-84	-0.618877	1	0.992	4.67377e-80
Sys1	3.94786e-151	0.418224	0.727	0.755	9.33984e-147	Rods		Myo1e	6.2993e-84	0.502657	0.455	0.127	1.49029e-79
Pmm1	1.00346e-150	0.527339	0.545	0.501	2.374e-146	Rods		Oaz1	3.25321e-83	0.49296	1	0.972	7.69644e-79
Sec22a	1.02843e-150	0.511602	0.587	0.553	2.43306e-146	Rods		Frmpd2	3.31396e-83	-1.08775	0.225	0.577	7.84016e-79
Unc5d	1.31899e-149	0.493683	0.668	0.581	3.12047e-145	Rods		Mir124-2hg	6.74236e-83	-0.781234	0.895	0.931	1.59511e-78
Mcf2l	2.6526e-149	0.54503	0.539	0.501	6.27551e-145	Rods		Slc4a7	9.40924e-83	-0.785106	0.825	0.909	2.22604e-78
Mat2a	2.70653e-147	0.4533	0.811	0.856	6.40311e-143	Rods		Tenm3	1.5147e-82	0.723686	0.832	0.447	3.58348e-78
Cspp1	1.02721e-146	0.430738	0.752	0.781	2.43017e-142	Rods		Gpsm2	3.24421e-82	0.366032	0.275	0.046	7.67515e-78
Ahcyl1	3.00935e-145	0.380463	0.794	0.849	7.11953e-141	Rods		Asic4	4.8872e-82	0.41846	0.464	0.13	1.15621e-77
Frmd4b	2.17434e-144	0.380106	0.881	0.842	5.14405e-140	Rods		Ndrg1	5.58935e-82	-0.871228	0.703	0.863	1.32233e-77
Naa35	1.74526e-142	0.562757	0.6	0.59	4.12895e-138	Rods		Galnt17	5.94819e-82	0.585797	0.351	0.081	1.40722e-77
Vax2os	2.78838e-142	0.785535	0.439	0.352	6.59676e-138	Rods		Ccnjl	9.52879e-82	0.371931	0.268	0.044	2.25432e-77
AY036118	3.69456e-141	0.536255	0.544	0.501	8.74059e-137	Rods		Bex1	1.25331e-81	0.524817	0.493	0.15	2.96508e-77
Syp	4.18255e-141	0.362649	0.82	0.841	9.89507e-137	Rods		Akap13	1.33942e-81	0.646248	0.848	0.46	3.1688e-77
Zfp654	1.05789e-140	0.450065	0.75	0.762	2.50276e-136	Rods		Samd7	1.68712e-81	-1.14309	0.591	0.805	3.99139e-77
H2afy	8.88499e-139	0.38748	0.815	0.871	2.10201e-134	Rods		Kcnb1	7.98044e-81	-0.786485	0.878	0.941	1.88801e-76
Zfp444	1.23387e-138	0.457189	0.63	0.616	2.91908e-134	Rods		Gab2	1.2277e-80	0.574778	0.434	0.12	2.90448e-76
Amer2	9.14351e-138	0.47613	0.593	0.556	2.16317e-133	Rods		Prkce	4.32458e-80	-0.941048	0.707	0.844	1.02311e-75
Fam104a	6.57245e-137	0.434701	0.714	0.758	1.55491e-132	Rods		Astn2	1.40338e-79	0.601591	0.504	0.17	3.32011e-75
Tmsb4x	3.25804e-136	0.370162	0.865	0.887	7.70787e-132	Rods		Vat1l	1.83834e-78	0.660748	0.667	0.279	4.34915e-74
Ypel2	1.34492e-135	0.504214	0.615	0.586	3.1818e-131	Rods		Lrrc2	7.21002e-78	-1.04675	0.267	0.59	1.70575e-73
Xrcc6	3.63147e-135	0.542237	0.607	0.588	8.59133e-131	Rods		Cox8a	3.41957e-77	0.493025	1	0.983	8.09001e-73
Osbp2	1.18055e-133	0.458424	0.617	0.585	2.79294e-129	Rods		Limch1	4.64352e-77	0.586035	0.993	0.898	1.09857e-72
Hs3st3b1	1.41368e-133	0.508709	0.465	0.375	3.34447e-129	Rods		Crot	5.39761e-77	0.421552	0.33	0.073	1.27697e-72
Ybx3	3.13124e-133	0.299452	0.926	0.924	7.4079e-129	Rods		Nrxn1	6.65025e-77	1.51183	0.599	0.28	1.57332e-72
Ndufb11	9.05361e-133	0.311372	0.944	0.97	2.1419e-128	Rods		Stmn3	1.20848e-76	0.441509	0.406	0.109	2.85903e-72
Dctn1	3.67315e-131	0.415267	0.692	0.72	8.68993e-127	Rods		Nrep	1.39405e-76	0.606976	0.916	0.611	3.29805e-72
Kirrel	5.75403e-131	0.462494	0.278	0.163	1.36129e-126	Rods		Agtpbp1	1.64629e-76	-0.672191	0.975	0.988	3.8948e-72
Sec22c	2.06094e-127	0.48857	0.342	0.237	4.87577e-123	Rods		Lig1	3.81504e-76	0.359673	0.34	0.078	9.02562e-72
Mok	8.75289e-127	0.486491	0.353	0.25	2.07076e-122	Rods		Usp46	4.61795e-76	0.43121	0.436	0.126	1.09252e-71
Arhgap24	1.13369e-126	0.514828	0.464	0.374	2.68209e-122	Rods		Hk1	1.00427e-75	-0.747372	0.795	0.873	2.37591e-71
Tbc1d8	3.49796e-125	0.484732	0.512	0.455	8.27547e-121	Rods		Kctd8	9.6593e-75	0.928759	0.947	0.689	2.2852e-70
Mdm1	6.3455e-125	0.49375	0.515	0.467	1.50122e-120	Rods		Rpl39	1.86642e-74	0.453466	1	0.978	4.41558e-70
Pacrg	6.82207e-122	0.523346	0.546	0.471	1.61397e-117	Rods		Zdhhc2	3.02841e-74	-0.759389	0.856	0.912	7.16462e-70
Lgmn	2.26745e-120	0.474537	0.506	0.47	5.36433e-116	Rods		Orai1	1.21078e-73	0.377913	0.38	0.099	2.86447e-69
Glmn	8.33642e-120	0.482603	0.627	0.644	1.97223e-115	Rods		Lsamp	4.44143e-73	-1.30084	0.971	0.969	1.05075e-68
Gas6	3.14371e-119	0.478176	0.451	0.377	7.43739e-115	Rods		Fhod3	7.55117e-73	0.717342	0.906	0.613	1.78646e-68
Son	7.52405e-117	0.286691	0.942	0.977	1.78004e-112	Rods		Frmd5	7.59636e-73	0.796853	0.885	0.574	1.79715e-68
Glo1	9.52963e-117	0.322674	0.944	0.952	2.25452e-112	Rods		Ddhd2	9.79674e-73	0.385249	0.387	0.104	2.31771e-68
Ppa2	1.6306e-116	0.407535	0.688	0.719	3.85768e-112	Rods		Pkia	1.01557e-72	0.65858	0.794	0.405	2.40263e-68
Cpe	2.62556e-116	0.312853	0.889	0.93	6.21156e-112	Rods		Pcp2	3.47674e-72	0.766483	0.468	0.157	8.22527e-68
Cacnb2	4.13588e-116	0.357919	0.903	0.876	9.78466e-112	Rods		Klhl29	6.68276e-72	-0.731694	0.931	0.961	1.58101e-67
Plk5	4.48439e-116	0.494339	0.349	0.248	1.06092e-111	Rods		Stx3	3.03946e-71	-0.616719	0.925	0.928	7.19075e-67
Lztfl1	3.83288e-112	0.452676	0.56	0.556	9.06782e-108	Rods		Ppargc1b	4.04151e-71	-0.912769	0.252	0.56	9.56139e-67
Slc44a1	7.8686e-112	0.439862	0.659	0.68	1.86155e-107	Rods		Dusp3	1.85883e-70	0.284474	0.274	0.054	4.39762e-66
Kif1b	5.96391e-111	0.276751	0.95	0.977	1.41094e-106	Rods		Ybx1	2.0713e-70	0.495103	0.994	0.933	4.90029e-66
Ap2m1	2.47461e-109	0.376491	0.763	0.827	5.85443e-105	Rods		Polr3k	2.13268e-70	0.670529	0.698	0.33	5.04548e-66
Fance	3.8304e-109	0.471892	0.44	0.379	9.06196e-105	Rods		Selenom	2.83484e-70	0.321848	0.264	0.05	6.70666e-66
Tbc1d30	8.82792e-109	0.475751	0.351	0.255	2.08851e-104	Rods		Zfp462	6.87718e-70	0.635459	0.901	0.574	1.627e-65
Jarid2	9.19547e-109	0.36751	0.832	0.889	2.17546e-104	Rods		Ntng1	7.52277e-70	1.00991	0.362	0.104	1.77974e-65
Rraga	6.89462e-108	0.502031	0.664	0.718	1.63113e-103	Rods		Sccpdh	1.68081e-68	0.432052	0.507	0.173	3.97646e-64
Mrps33	1.46173e-107	0.38503	0.771	0.833	3.45816e-103	Rods		Rpgrip1	1.76285e-68	-0.594727	0.957	0.984	4.17055e-64
Srrm4	3.55396e-107	0.301251	0.909	0.898	8.40795e-103	Rods		Tdrd7	3.99275e-68	-0.871125	0.399	0.641	9.44604e-64
Gngt2	1.01719e-106	0.36955	0.701	0.684	2.40647e-102	Rods		Pde6g	7.42943e-68	-0.595818	0.975	0.985	1.75765e-63
AC146911.1	1.59551e-106	0.418614	0.269	0.166	3.77465e-102	Rods		Itm2b	1.12152e-67	0.581024	0.962	0.762	2.65329e-63
Mxra7	2.46426e-105	0.394517	0.552	0.497	5.82995e-101	Rods		Spon1	1.69783e-67	0.480906	0.324	0.081	4.01673e-63
Pitpnm1	5.53289e-105	0.401596	0.622	0.633	1.30897e-100	Rods		Elob	3.87855e-67	0.441484	0.999	0.955	9.17588e-63
Lgalsl	1.54279e-103	0.44111	0.614	0.632	3.64993e-99	Rods		Six3	7.58472e-67	0.527553	0.676	0.302	1.79439e-62
Lrit1	4.51694e-103	0.428469	0.492	0.439	1.06862e-98	Rods		mt-Nd2	1.01295e-66	0.523555	1	0.997	2.39643e-62
Chd7	4.68069e-103	0.322854	0.803	0.825	1.10736e-98	Rods		Plcb4	1.83497e-66	-0.662063	0.92	0.955	4.34116e-62
Zbtb7c	1.6795e-102	0.419522	0.698	0.647	3.97336e-98	Rods		Pitpnm3	3.18822e-66	-0.969514	0.277	0.569	7.54269e-62
Cirbp	2.00318e-102	0.313006	0.884	0.932	4.73911e-98	Rods		Cpeb2	3.92187e-66	0.390971	0.418	0.128	9.27837e-62
Fbxl7	2.99018e-102	0.746269	0.584	0.529	7.07416e-98	Rods		Ptprs	5.62088e-66	0.558913	0.725	0.365	1.32979e-61
Fryl	7.01928e-101	0.365163	0.72	0.757	1.66062e-96	Rods		Nt5c3b	6.33483e-66	0.26122	0.262	0.052	1.49869e-61
Slc25a33	1.77877e-99	0.377874	0.653	0.665	4.20822e-95	Rods		Gnb5	7.44553e-66	-0.717217	0.75	0.833	1.76146e-61
Elovl4	5.68558e-99	0.294084	0.829	0.854	1.3451e-94	Rods		Ppfia2	2.22051e-65	0.498199	0.997	0.965	5.25329e-61
Card19	1.16134e-98	0.429859	0.317	0.229	2.74749e-94	Rods		Cabp4	3.09255e-65	-0.842057	0.162	0.49	7.31635e-61
Camk1d	3.76637e-98	0.266393	0.946	0.923	8.91048e-94	Rods		Abhd3	6.09214e-65	0.464941	0.523	0.195	1.44128e-60
Gm37240	1.22743e-97	0.524943	0.567	0.562	2.90386e-93	Rods		Hmgn5	2.17879e-64	0.367272	0.398	0.119	5.15457e-60
Trak2	1.59163e-97	0.415504	0.62	0.641	3.76548e-93	Rods		Ssbp4	2.27049e-64	0.584893	0.719	0.357	5.37152e-60
Abhd17a	2.54898e-97	0.434734	0.607	0.639	6.03037e-93	Rods		Aff2	2.49807e-64	0.433525	0.271	0.059	5.90993e-60
Fam53b	2.96225e-97	0.443077	0.331	0.246	7.00809e-93	Rods		Pde6c	2.82359e-64	0.338297	0.258	0.053	6.68005e-60
1190005I06Rik	5.2201e-97	0.41798	0.558	0.52	1.23497e-92	Rods		Pik3r1	3.3503e-64	0.690536	0.853	0.537	7.92613e-60
Wasf3	5.72387e-97	0.392979	0.639	0.672	1.35415e-92	Rods		Enox1	3.99924e-64	0.661514	0.39	0.126	9.46141e-60
Otx2	1.21024e-96	0.33232	0.77	0.771	2.86318e-92	Rods		Hr	4.06643e-64	0.440101	0.566	0.221	9.62036e-60
Emc7	2.88747e-96	0.388442	0.734	0.803	6.83117e-92	Rods		Gspt1	4.60131e-64	0.603311	0.938	0.707	1.08858e-59
Commd1	5.28815e-96	0.364574	0.722	0.791	1.25107e-91	Rods		Gm47071	4.90269e-64	0.439785	0.311	0.079	1.15988e-59
Dcc	5.30057e-96	0.253902	0.493	0.405	1.25401e-91	Rods		Ndrg3	7.05009e-64	-0.801521	0.629	0.767	1.66791e-59
Klf10	1.02466e-95	0.481376	0.333	0.251	2.42413e-91	Rods		Rhobtb3	7.42871e-64	0.332047	0.389	0.114	1.75748e-59
Wwtr1	1.26235e-95	0.486022	0.454	0.386	2.98647e-91	Rods		Cntn1	1.55563e-63	0.738887	0.742	0.389	3.68032e-59
C1qtnf12	1.64832e-94	0.449353	0.391	0.32	3.89959e-90	Rods		Ankrd33	1.56514e-63	-0.813287	0.38	0.626	3.7028e-59
Gadd45a	5.68174e-94	0.473663	0.389	0.318	1.34419e-89	Rods		Fat3	1.87538e-63	0.534506	0.293	0.072	4.43678e-59
Tnrc6b	1.31446e-93	0.269243	0.91	0.955	3.10976e-89	Rods		2010107E04Rik	1.94008e-63	-0.532063	0.996	0.964	4.58983e-59
Crtc3	1.42474e-93	0.470494	0.528	0.521	3.37066e-89	Rods		Gng3	1.79764e-62	0.471638	0.353	0.102	4.25286e-58
Ormdl3	1.75602e-93	0.459073	0.552	0.564	4.15439e-89	Rods		mt-Nd4	2.68033e-62	0.428184	1	0.999	6.34112e-58
Frmpd1	6.66277e-93	0.443912	0.278	0.181	1.57628e-88	Rods		Abtb2	4.34489e-62	0.356055	0.264	0.057	1.02791e-57
Gm26518	5.68768e-91	0.445721	0.566	0.577	1.34559e-86	Rods		Mtus1	5.72386e-62	0.474646	0.62	0.265	1.35415e-57
Arl3	8.25899e-91	0.268224	0.874	0.921	1.95391e-86	Rods		Ikbip	1.33578e-61	0.368996	0.378	0.113	3.16019e-57
Rsrc2	1.79645e-90	0.27572	0.878	0.938	4.25004e-86	Rods		Rorb	7.6901e-61	0.545094	0.997	0.97	1.81932e-56
Gm48677	2.96456e-90	0.441922	0.327	0.246	7.01355e-86	Rods		Gpm6b	1.83548e-60	-0.833203	0.816	0.874	4.34239e-56
AW549877	6.93308e-90	0.475153	0.495	0.486	1.64023e-85	Rods		Txndc5	1.83641e-60	0.305862	0.318	0.083	4.34458e-56
Hcn1	1.12234e-89	0.258215	0.994	0.97	2.65524e-85	Rods		Hmgn3	2.62535e-60	0.531281	0.742	0.378	6.21105e-56
Bbs7	1.18158e-89	0.45471	0.375	0.309	2.79537e-85	Rods		Platr17	2.82512e-60	-0.668293	0.854	0.888	6.68366e-56
Rfx2	2.71565e-89	0.400342	0.328	0.241	6.42468e-85	Rods		Atp2b1	3.81617e-60	0.502136	0.982	0.889	9.0283e-56
Gdpd5	2.86613e-88	0.413223	0.534	0.519	6.78069e-84	Rods		Sgip1	4.77781e-60	-0.694726	0.873	0.925	1.13034e-55
Btg2	4.73648e-88	0.368332	0.667	0.67	1.12056e-83	Rods		Fabp12	8.17389e-60	-0.637741	0.829	0.934	1.93378e-55
Pias3	4.76986e-88	0.45038	0.338	0.264	1.12845e-83	Rods		Bex3	8.44044e-60	0.518057	0.811	0.445	1.99684e-55
Zfp536	9.06911e-88	0.341658	0.768	0.8	2.14557e-83	Rods		B3galt2	1.22404e-59	0.297872	0.289	0.07	2.89582e-55
Ypel3	9.38003e-88	0.368377	0.646	0.686	2.21913e-83	Rods		Scg3	1.36337e-59	0.502364	0.672	0.315	3.22545e-55
Clcn3	2.0952e-87	0.266176	0.862	0.917	4.95681e-83	Rods		Asph	2.01546e-59	0.484057	0.636	0.286	4.76818e-55
Cfap61	3.97913e-87	0.407849	0.258	0.168	9.41383e-83	Rods		Rps24	3.3458e-59	0.377831	0.997	0.983	7.9155e-55
Cdh4	4.3609e-86	0.499507	0.448	0.384	1.0317e-81	Rods		Gm42418	3.43838e-59	-0.439944	1	1	8.13452e-55
Tmem243	1.68145e-85	0.377505	0.608	0.625	3.97798e-81	Rods		Stxbp1	5.49214e-59	0.514615	0.925	0.683	1.29933e-54
Rp1l1	2.82363e-85	0.415079	0.489	0.454	6.68015e-81	Rods		Hmgb3	1.23676e-58	0.450273	0.617	0.264	2.92593e-54
Itga4	1.30495e-84	0.400603	0.33	0.249	3.08725e-80	Rods		Gm13963	4.74799e-58	0.326688	0.404	0.129	1.12328e-53
Prkcz	3.04868e-84	0.431831	0.392	0.331	7.21256e-80	Rods		Ell2	5.75859e-58	0.43799	0.411	0.14	1.36237e-53
Bicdl1	4.36948e-84	0.405212	0.577	0.574	1.03373e-79	Rods		Prdx6	8.46919e-58	0.377887	0.467	0.166	2.00364e-53
Onecut2	5.74489e-83	0.498007	0.376	0.3	1.35913e-78	Rods		Gnas	8.65519e-58	0.481575	0.979	0.813	2.04764e-53
Whrn	6.67041e-83	0.426825	0.39	0.327	1.57809e-78	Rods		Map1b	1.12796e-57	-0.475232	0.991	0.98	2.66852e-53
Armc9	4.76891e-82	0.444305	0.433	0.391	1.12823e-77	Rods		Csrnp3	2.97564e-57	0.481307	0.482	0.183	7.03977e-53
Tmem9	5.84045e-81	0.403322	0.571	0.592	1.38173e-76	Rods		Nectin3	9.32649e-57	0.521583	0.683	0.346	2.20646e-52
Rock2	3.25603e-80	0.271397	0.853	0.884	7.70313e-76	Rods		Cox7a2l	9.45162e-57	0.557256	0.962	0.728	2.23607e-52
Fbxo9	1.01695e-79	0.404713	0.574	0.6	2.40589e-75	Rods		Hsbp1l1	2.00549e-56	-0.789902	0.3	0.545	4.74458e-52
Lurap1l	4.64316e-79	0.421634	0.473	0.439	1.09848e-74	Rods		Snrpn	2.12843e-56	0.528759	0.561	0.237	5.03543e-52
Scube1	5.24951e-79	0.443453	0.326	0.237	1.24193e-74	Rods		2310030A07Rik	5.37471e-56	-0.848079	0.352	0.586	1.27155e-51
Kif21b	6.13116e-77	0.431202	0.403	0.36	1.45051e-72	Rods		Rho	1.19297e-55	-1.66125	0.364	0.59	2.82233e-51
Aff1	6.17552e-76	0.416804	0.602	0.634	1.46101e-71	Rods		Asap1	1.91308e-55	0.429751	0.728	0.361	4.52596e-51
Tmem176a	1.90494e-75	0.491265	0.548	0.555	4.50672e-71	Rods		Rs1	2.96398e-55	-0.573651	0.913	0.943	7.01218e-51
Fgd4	3.36745e-75	0.359341	0.699	0.756	7.9667e-71	Rods		Hsp90ab1	3.61483e-55	0.499059	0.982	0.834	8.55196e-51
B4galt1	4.96779e-75	0.40668	0.519	0.498	1.17528e-70	Rods		Sri	4.89153e-55	0.293297	0.38	0.121	1.15724e-50
Lpcat2	1.06079e-74	0.45052	0.379	0.314	2.50962e-70	Rods		Vtn	6.30915e-55	0.4582	0.513	0.207	1.49262e-50
Tmem237	4.18264e-72	0.27643	0.779	0.796	9.8953e-68	Rods		Thra	9.56714e-55	0.424162	0.62	0.278	2.26339e-50
Fbxl5	1.8012e-71	0.383525	0.589	0.639	4.26129e-67	Rods		Smim13	1.07213e-54	0.509739	0.895	0.618	2.53644e-50
Pla2r1	1.09967e-70	0.393858	0.259	0.177	2.60161e-66	Rods		Foxn3	1.14061e-54	0.524163	0.719	0.379	2.69846e-50
Jund	3.09254e-70	0.272012	0.804	0.847	7.31633e-66	Rods		Tmem164	1.32915e-54	0.421413	0.368	0.118	3.14451e-50
Sorbs2	9.09726e-70	0.417889	0.717	0.754	2.15223e-65	Rods		Igf2r	1.86638e-54	0.34056	0.479	0.177	4.41548e-50
Tob2	5.01177e-69	0.413631	0.461	0.444	1.18568e-64	Rods		Trps1	2.94738e-54	0.600215	0.876	0.582	6.97292e-50
Syngr1	5.37206e-69	0.364104	0.544	0.562	1.27092e-64	Rods		Reep6	5.13254e-54	-0.826512	0.186	0.467	1.21426e-49
Chsy1	1.17324e-68	0.395783	0.482	0.467	2.77564e-64	Rods		Akap11	6.53597e-54	0.511273	0.819	0.497	1.54628e-49
Snx10	2.69859e-67	0.387546	0.449	0.416	6.38431e-63	Rods		Chd3	6.91319e-54	0.432687	0.63	0.287	1.63552e-49
Ttc28	5.91987e-67	0.357006	0.649	0.669	1.40052e-62	Rods		Trim35	7.43753e-54	0.321989	0.38	0.124	1.75957e-49
E2f3	2.44055e-66	0.429199	0.356	0.307	5.77386e-62	Rods		Acsl3	7.85205e-54	0.520232	0.73	0.388	1.85764e-49
Prkab1	7.44558e-66	0.38832	0.306	0.244	1.76147e-61	Rods		Tnfsf12	1.91451e-53	-0.734923	0.406	0.619	4.52936e-49
Dync1h1	1.24483e-65	0.351087	0.628	0.701	2.94501e-61	Rods		Atxn7l3b	2.36371e-53	0.479029	0.981	0.812	5.59207e-49
Tln2	9.42242e-65	0.395253	0.52	0.527	2.22916e-60	Rods		Pcmtd2	3.71966e-53	0.537122	0.969	0.793	8.79997e-49
Mmd	1.22989e-64	0.400074	0.455	0.433	2.90968e-60	Rods		Tjp1	4.16845e-53	-0.883783	0.778	0.843	9.86173e-49
Ift43	7.37802e-64	0.40126	0.486	0.498	1.74549e-59	Rods		Vamp4	5.49138e-53	0.394441	0.568	0.24	1.29915e-48
Gm17018	1.1136e-63	0.398794	0.452	0.445	2.63454e-59	Rods		Gm37240	8.64724e-53	-0.907255	0.508	0.673	2.04576e-48
Scamp5	1.96178e-63	0.385125	0.48	0.487	4.64118e-59	Rods		Uckl1os	1.16081e-52	-0.787241	0.264	0.522	2.74625e-48
Gm16062	4.56197e-63	0.391161	0.319	0.253	1.07927e-58	Rods		Clpx	1.43875e-52	0.498404	0.748	0.403	3.4038e-48
Eml5	2.43084e-62	0.280136	0.834	0.885	5.75087e-58	Rods		St3gal1	1.4512e-52	-0.7665	0.214	0.489	3.43324e-48
5330413P13Rik	1.03605e-61	0.384932	0.319	0.26	2.45109e-57	Rods		mt-Cytb	1.92319e-52	0.349546	1	1	4.54989e-48
Ccdc107	5.53403e-61	0.284254	0.693	0.744	1.30924e-56	Rods		Plxna2	2.11066e-52	0.585764	0.89	0.623	4.9934e-48
Lsm4	1.15045e-60	0.323291	0.687	0.775	2.72173e-56	Rods		Gpm6a	2.32558e-52	0.440691	0.496	0.199	5.50186e-48
Dnttip2	1.36379e-60	0.282947	0.76	0.801	3.22646e-56	Rods		Ptms	3.29351e-52	0.509456	0.985	0.885	7.79178e-48
Bcat1	5.9166e-60	0.40102	0.471	0.467	1.39975e-55	Rods		Fam135b	3.72352e-52	0.638375	0.318	0.1	8.80911e-48
Scarb1	1.0439e-59	0.377803	0.321	0.267	2.46966e-55	Rods		Prkca	6.87567e-52	-0.696758	0.86	0.916	1.62665e-47
Klhdc8b	1.57565e-59	0.393154	0.329	0.278	3.72767e-55	Rods		Klhl8	8.70886e-52	0.391918	0.536	0.226	2.06034e-47
Gm15706	1.99325e-58	0.382145	0.264	0.2	4.71562e-54	Rods		Ankrd37	1.38455e-51	0.413505	0.592	0.265	3.27556e-47
Prdm1	3.03156e-58	0.435242	0.265	0.199	7.17207e-54	Rods		Svip	2.41566e-51	0.462513	0.599	0.28	5.71496e-47
Clasp1	9.99206e-58	0.331667	0.652	0.724	2.36392e-53	Rods		Osbp2	4.08714e-51	-0.69055	0.605	0.729	9.66936e-47
Ccnl1	2.35725e-57	0.346238	0.597	0.652	5.57679e-53	Rods		Ccdc88a	4.33551e-51	0.489202	0.829	0.515	1.02569e-46
Gadd45b	2.38906e-57	0.30288	0.366	0.308	5.65205e-53	Rods		Tub	5.58752e-51	-0.736295	0.513	0.682	1.3219e-46
Wapl	4.84453e-57	0.318052	0.667	0.75	1.14612e-52	Rods		Cacna2d4	7.26352e-51	-0.74788	0.555	0.725	1.7184e-46
Ap1b1	2.7223e-56	0.335539	0.593	0.644	6.44042e-52	Rods		Rtn4	1.44554e-50	0.485384	0.978	0.894	3.41985e-46
Ttll5	8.50875e-55	0.400729	0.464	0.457	2.013e-50	Rods		Klhl23	1.53952e-50	0.378402	0.535	0.227	3.64221e-46
Wwox	1.51953e-54	0.363415	0.805	0.828	3.59489e-50	Rods		Tulp1	1.61385e-50	-0.418481	0.996	0.984	3.81804e-46
Tet3	2.34674e-54	0.268072	0.704	0.785	5.55192e-50	Rods		Itga4	2.03173e-50	-0.727201	0.208	0.465	4.80668e-46
Dusp26	7.48601e-54	0.383433	0.321	0.267	1.77104e-49	Rods		Cntn4	2.12114e-50	0.863303	0.548	0.261	5.0182e-46
Wdpcp	8.05365e-54	0.447687	0.434	0.401	1.90533e-49	Rods		Ambra1	2.99828e-50	0.527807	0.872	0.637	7.09333e-46
Trafd1	8.45417e-54	0.384277	0.452	0.455	2.00009e-49	Rods		5430419D17Rik	3.01245e-50	0.568728	0.708	0.415	7.12685e-46
Sdc4	5.64631e-53	0.278836	0.284	0.219	1.3358e-48	Rods		Pacsin1	3.29377e-50	0.45924	0.695	0.36	7.7924e-46
Lsm14a	1.98231e-52	0.258611	0.741	0.807	4.68974e-48	Rods		Slc7a8	4.64438e-50	-0.822773	0.296	0.538	1.09877e-45
Grk1	2.91495e-52	0.337275	0.501	0.504	6.89618e-48	Rods		Pcsk2	6.50089e-50	-0.900594	0.258	0.513	1.53798e-45
Nme5	3.83561e-52	0.397279	0.293	0.239	9.07429e-48	Rods		Gk5	1.56596e-49	0.295629	0.256	0.066	3.70476e-45
Svil	4.95891e-52	0.395321	0.394	0.359	1.17318e-47	Rods		Cnppd1	1.78681e-49	0.280346	0.386	0.131	4.22723e-45
Ppard	1.27132e-50	0.402944	0.343	0.306	3.00769e-46	Rods		Pcdh15	3.42705e-49	0.392947	1	0.995	8.10772e-45
Uckl1	1.82464e-50	0.379877	0.392	0.371	4.31672e-46	Rods		Zfpm2	3.80644e-49	0.444295	0.389	0.143	9.00528e-45
Kras	3.59515e-50	0.349607	0.57	0.641	8.50541e-46	Rods		Prps1	4.38815e-49	0.254965	0.351	0.112	1.03815e-44
Pip4k2c	6.49011e-50	0.347152	0.288	0.238	1.53543e-45	Rods		Me2	5.0627e-49	0.445045	0.623	0.305	1.19773e-44
Spry2	2.52919e-49	0.350243	0.407	0.382	5.98357e-45	Rods		Rasl10b	8.49885e-49	0.325507	0.439	0.167	2.01066e-44
Ndufb10	1.6321e-47	0.253467	0.771	0.869	3.86122e-43	Rods		Mcrs1	1.05785e-48	0.391524	0.601	0.272	2.50267e-44
Abhd14b	8.90775e-47	0.33367	0.548	0.581	2.10739e-42	Rods		Ppp2r2b	1.39288e-48	-0.559274	0.99	0.99	3.29529e-44
Chga	1.03632e-46	0.467559	0.481	0.493	2.45172e-42	Rods		Usp25	2.11712e-48	0.411701	0.661	0.32	5.00869e-44
Acsl6	1.94976e-46	0.35795	0.429	0.429	4.61273e-42	Rods		Zfp827	2.19054e-48	0.258867	0.345	0.111	5.18238e-44
Gm14211	2.27324e-46	0.373947	0.252	0.197	5.37803e-42	Rods		Ncoa2	2.3533e-48	-0.651709	0.773	0.848	5.56744e-44
Igsf9	1.01978e-45	0.339282	0.254	0.202	2.41259e-41	Rods		Ptprd	3.1829e-48	1.4874	0.751	0.516	7.53011e-44
Tmx1	6.86271e-45	0.287814	0.625	0.708	1.62358e-40	Rods		Unc5c	7.98003e-48	-1.06473	0.514	0.694	1.88791e-43
Ext1	9.49927e-45	0.333015	0.718	0.784	2.24734e-40	Rods		St6galnac5	1.83489e-47	0.593561	0.62	0.314	4.34097e-43
2510009E07Rik	1.73322e-44	0.299922	0.581	0.624	4.10046e-40	Rods		Ano2	2.38339e-47	-0.614784	0.797	0.867	5.63863e-43
Wdr31	5.47363e-44	0.342182	0.328	0.29	1.29495e-39	Rods		Cuedc1	2.53664e-47	0.529324	0.863	0.564	6.00118e-43
Ier3	1.52154e-43	0.301137	0.4	0.375	3.59967e-39	Rods		Serpini1	2.9889e-47	0.324861	0.346	0.114	7.07115e-43
Rtkn2	6.58168e-43	0.322911	0.515	0.518	1.55709e-38	Rods		Mlf1	3.32945e-47	-0.797389	0.414	0.621	7.87681e-43
Gm48321	1.11549e-42	0.356027	0.289	0.241	2.63902e-38	Rods		Chd4	5.5017e-47	0.490287	0.926	0.685	1.30159e-42
Slc3a2	1.52144e-42	0.306402	0.548	0.576	3.59942e-38	Rods		mt-Co1	6.5651e-47	0.347426	1	1	1.55317e-42
Uhmk1	4.63098e-42	0.360284	0.425	0.426	1.0956e-37	Rods		Bcl7a	9.17872e-47	0.291834	0.362	0.124	2.1715e-42
Mtcl1	4.92072e-42	0.307761	0.612	0.673	1.16414e-37	Rods		Pole4	9.25566e-47	0.342006	0.468	0.188	2.1897e-42
Arhgef26	1.09644e-41	0.316691	0.518	0.522	2.59396e-37	Rods		Celf2	1.4353e-46	-0.431439	0.99	0.995	3.39563e-42
Mbnl1	7.27568e-41	0.321269	0.605	0.673	1.72128e-36	Rods		Sgk1	6.84246e-46	0.266688	0.259	0.072	1.61879e-41
Wdr60	8.36006e-41	0.358691	0.452	0.456	1.97782e-36	Rods		Tubb5	1.24269e-45	0.554542	0.859	0.575	2.93995e-41
Sirt2	9.37835e-41	0.35054	0.48	0.516	2.21873e-36	Rods		Marcks	1.75606e-45	0.521121	0.664	0.364	4.15449e-41
Pde6a	1.08635e-40	0.33805	0.453	0.434	2.57009e-36	Rods		Prdx2	1.98918e-45	0.469815	0.954	0.732	4.70601e-41
Oxct1	1.88991e-40	0.258741	0.785	0.877	4.47114e-36	Rods		Jarid2	2.06695e-45	-0.595122	0.903	0.915	4.88999e-41
Uqcc3	4.70033e-40	0.261382	0.631	0.695	1.112e-35	Rods		Apbb1	2.15589e-45	0.430078	0.763	0.412	5.1004e-41
Map3k1	1.33134e-39	0.280559	0.589	0.629	3.14967e-35	Rods		Rpl27a	2.65023e-45	0.332931	0.999	0.964	6.2699e-41
Prkce	1.72242e-39	0.272045	0.701	0.758	4.07491e-35	Rods		Mllt3	2.87004e-45	-0.808338	0.384	0.589	6.78995e-41
Dync1li1	2.46097e-39	0.250309	0.696	0.777	5.82217e-35	Rods		Kpna3	7.71816e-45	-0.721769	0.694	0.776	1.82596e-40
Ssx2ip	1.05997e-37	0.345829	0.445	0.457	2.50768e-33	Rods		Rpl31	1.53271e-44	0.410927	0.968	0.829	3.62608e-40
Arl13b	1.73463e-37	0.358154	0.429	0.435	4.10378e-33	Rods		Lyar	2.52059e-44	-0.682866	0.577	0.704	5.96322e-40
C1ql3	2.12931e-37	0.319413	0.475	0.469	5.03752e-33	Rods		Mylip	3.33884e-44	0.406275	0.566	0.265	7.89904e-40
Rnf121	4.40043e-37	0.45143	0.442	0.466	1.04105e-32	Rods		Dtna	3.67135e-44	0.440475	0.564	0.268	8.68568e-40
Tshz2	7.40337e-37	0.356431	0.288	0.234	1.75149e-32	Rods		Tbc1d30	7.56777e-44	-0.724525	0.163	0.409	1.79038e-39
Ddhd1	8.49996e-37	0.296427	0.568	0.624	2.01092e-32	Rods		Ttc3	1.90577e-43	0.467626	0.834	0.549	4.50867e-39
Tiparp	1.38293e-35	0.41314	0.496	0.535	3.27173e-31	Rods		Plk5	2.26475e-43	-0.71424	0.271	0.501	5.35795e-39
D430042O09Rik	3.8008e-35	0.341989	0.358	0.343	8.99194e-31	Rods		Ntm	3.52254e-43	0.516244	0.944	0.814	8.33363e-39
Dalrd3	2.2751e-34	0.341648	0.501	0.55	5.38244e-30	Rods		Snap25	3.70175e-43	-0.400034	0.996	0.989	8.75761e-39
Raly	4.39001e-34	0.284138	0.586	0.671	1.03859e-29	Rods		Heg1	5.49686e-43	-0.801233	0.396	0.597	1.30045e-38
Ttyh1	1.15908e-33	0.30587	0.421	0.409	2.74215e-29	Rods		Mdga2	5.55976e-43	1.00051	0.751	0.519	1.31533e-38
Ccdc173	2.14727e-33	0.344575	0.279	0.243	5.08001e-29	Rods		H2afv	5.76799e-43	0.43782	0.985	0.835	1.36459e-38
Sh3bgrl2	3.85597e-33	0.344011	0.385	0.383	9.12245e-29	Rods		Cadps	6.47989e-43	0.518303	0.62	0.34	1.53301e-38
Rhbdl3	4.61246e-33	0.337847	0.252	0.211	1.09122e-28	Rods		Mtss1	6.59075e-43	0.293999	0.467	0.192	1.55924e-38
Ppm1n	6.15768e-33	0.304355	0.252	0.21	1.45678e-28	Rods		Otx2os1	6.72021e-43	-0.578573	0.948	0.968	1.58987e-38
Kpna2	7.56104e-33	0.312491	0.282	0.249	1.78879e-28	Rods		Lbh	1.29946e-42	0.3466	0.58	0.272	3.07425e-38
Elmod2	7.72109e-33	0.324818	0.276	0.243	1.82666e-28	Rods		Gm48236	1.39703e-42	-0.755476	0.239	0.465	3.30509e-38
Gm17231	1.06454e-32	0.362618	0.381	0.37	2.51848e-28	Rods		Tpi1	1.61328e-42	0.478302	0.906	0.695	3.8167e-38
Gramd1b	5.60499e-32	0.255295	0.586	0.65	1.32603e-27	Rods		Sulf2	1.62079e-42	0.46436	0.395	0.16	3.83445e-38
Lactbl1	6.93788e-32	0.270217	0.296	0.253	1.64136e-27	Rods		Shisa6	1.64171e-42	0.356283	0.333	0.116	3.88396e-38
Usp33	1.0838e-31	0.325797	0.523	0.589	2.56406e-27	Rods		Dnajc6	1.95625e-42	0.435286	0.672	0.358	4.6281e-38
Hook3	1.14332e-31	0.286377	0.617	0.707	2.70487e-27	Rods		Arhgap24	1.95754e-42	-0.75698	0.442	0.61	4.63115e-38
Scn8a	1.63547e-31	0.33276	0.465	0.494	3.8692e-27	Rods		Smim14	2.19645e-42	0.296826	0.535	0.232	5.19636e-38
Spata1	1.90295e-31	0.342821	0.352	0.331	4.50201e-27	Rods		Dlg4	2.46207e-42	-0.624631	0.605	0.712	5.82477e-38
Ccdc6	3.40827e-31	0.33619	0.333	0.321	8.06328e-27	Rods		Susd3	2.68633e-42	-0.607754	0.13	0.377	6.35532e-38
Ctbp2	8.21021e-31	0.308019	0.509	0.568	1.94237e-26	Rods		Rps9	3.56714e-42	0.368528	1	0.925	8.43913e-38
Rps6ka2	1.02598e-30	0.326668	0.432	0.44	2.42727e-26	Rods		Map2	4.38999e-42	-0.427465	0.987	0.986	1.03858e-37
Slc2a1	1.09342e-30	0.325937	0.361	0.354	2.58681e-26	Rods		Pacrg	4.43767e-42	-0.75695	0.524	0.686	1.04986e-37
Gpr180	1.18244e-30	0.282706	0.56	0.616	2.79742e-26	Rods		Cbx5	5.08701e-42	0.288584	0.448	0.179	1.20348e-37
Lifr	2.57819e-30	0.292747	0.449	0.453	6.09947e-26	Rods		Fcho2	5.13114e-42	0.46739	0.816	0.536	1.21392e-37
Fsd1l	3.67519e-30	0.3333	0.431	0.454	8.69476e-26	Rods		Ldlrad3	5.78056e-42	0.310059	0.389	0.15	1.36757e-37
Rrp1b	1.63104e-29	0.288308	0.548	0.595	3.85872e-25	Rods		Wnk2	6.81335e-42	0.277517	0.399	0.152	1.6119e-37
Upf3b	1.30494e-28	0.255258	0.64	0.729	3.08723e-24	Rods		Tceal3	7.25645e-42	0.277709	0.334	0.116	1.71673e-37
Ccdc117	4.04362e-28	0.317401	0.269	0.242	9.5664e-24	Rods		Tnpo1	7.8419e-42	-0.431808	0.982	0.98	1.85524e-37
D630045J12Rik	5.93785e-28	0.317035	0.304	0.285	1.40478e-23	Rods		Sec14l1	7.84251e-42	0.442321	0.785	0.478	1.85538e-37
Ndfip1	1.27159e-27	0.252565	0.678	0.786	3.00834e-23	Rods		Lcorl	1.26917e-41	0.485344	0.963	0.819	3.0026e-37
Lars2	1.89027e-27	0.368253	0.34	0.337	4.47199e-23	Rods		Hsp90aa1	1.80387e-41	0.340498	1	0.971	4.2676e-37
Gm26827	2.41004e-27	0.328065	0.296	0.27	5.70166e-23	Rods		Bex2	2.07201e-41	0.433983	0.92	0.679	4.90197e-37
Cdc42ep3	4.30354e-27	0.312309	0.3	0.278	1.01813e-22	Rods		Gucy2f	2.79227e-41	-0.71805	0.082	0.322	6.60596e-37
Svop	5.43707e-27	0.327331	0.397	0.404	1.2863e-22	Rods		Rps10	3.20076e-41	0.366563	1	0.951	7.57236e-37
Cebpd	7.5295e-27	0.441134	0.553	0.585	1.78133e-22	Rods		Tead1	3.69109e-41	0.416892	0.739	0.431	8.73237e-37
Rax	7.98208e-27	0.272461	0.542	0.593	1.8884e-22	Rods		Arhgef2	4.76326e-41	0.34623	0.568	0.27	1.12689e-36
Zfp445	2.92663e-26	0.287454	0.582	0.681	6.92382e-22	Rods		Sub1	5.75841e-41	0.413818	0.923	0.673	1.36232e-36
Fam212b	2.9504e-26	0.299411	0.303	0.28	6.98005e-22	Rods		Dcaf7	7.31273e-41	0.356613	0.602	0.3	1.73005e-36
Yeats4	5.23153e-26	0.278243	0.59	0.688	1.23768e-21	Rods		Zscan21	8.61544e-41	0.284308	0.399	0.156	2.03824e-36
Btc	1.40881e-25	0.263842	0.342	0.318	3.33295e-21	Rods		Epas1	8.73062e-41	-0.658052	0.172	0.409	2.06549e-36
Polr2e	1.76712e-25	0.313018	0.493	0.568	4.18065e-21	Rods		Snrk	9.7099e-41	-0.627509	0.471	0.63	2.29717e-36
Plekha7	2.00794e-25	0.284072	0.275	0.244	4.75038e-21	Rods		Rpl3	9.76021e-41	0.389935	0.99	0.91	2.30907e-36
Snta1	2.02052e-25	0.350632	0.335	0.328	4.78015e-21	Rods		Mthfs	1.5244e-40	0.323941	0.498	0.218	3.60643e-36
Zfp787	6.31304e-25	0.299078	0.439	0.48	1.49354e-20	Rods		Wwox	1.72801e-40	-0.805951	0.825	0.88	4.08813e-36
Mab21l1	3.02525e-24	0.307189	0.429	0.455	7.15713e-20	Rods		Car2	2.65593e-40	0.501322	0.904	0.695	6.28341e-36
Wdr27	6.61151e-23	0.294641	0.285	0.266	1.56415e-18	Rods		Otud7b	3.01363e-40	-0.566412	0.845	0.869	7.12964e-36
Acvr2b	1.59848e-22	0.291637	0.278	0.261	3.78169e-18	Rods		Hmgb2	3.13774e-40	0.385531	0.679	0.365	7.42327e-36
Tecpr1	1.60136e-22	0.316806	0.362	0.374	3.7885e-18	Rods		Rwdd4a	4.80237e-40	0.374594	0.536	0.252	1.13614e-35
Tmem230	3.14448e-22	0.306674	0.447	0.497	7.43922e-18	Rods		Chchd10	5.7486e-40	-0.460697	0.941	0.951	1.36e-35
Ccdc85c	7.21018e-22	0.303436	0.39	0.414	1.70578e-17	Rods		Selenow	5.78237e-40	0.416206	0.973	0.831	1.36799e-35
Ndufv1	1.05161e-21	0.25665	0.564	0.661	2.48791e-17	Rods		Prkcz	6.94353e-40	-0.640853	0.283	0.494	1.6427e-35
4933411O13Rik	1.06389e-21	0.291675	0.293	0.273	2.51694e-17	Rods		Rtn4rl1	7.45438e-40	0.323832	0.427	0.179	1.76356e-35
Tmem176b	2.12945e-21	0.305233	0.606	0.692	5.03786e-17	Rods		Zfp536	1.51225e-39	-0.595787	0.779	0.854	3.57767e-35
Cul5	2.26678e-21	0.253737	0.631	0.742	5.36276e-17	Rods		Mthfsl	1.87063e-39	0.286826	0.533	0.239	4.42554e-35
Synrg	2.87933e-21	0.27533	0.539	0.631	6.81192e-17	Rods		Rps29	1.93145e-39	0.271575	1	0.993	4.56943e-35
Rnf144b	9.60896e-21	0.288797	0.398	0.408	2.27329e-16	Rods		Tmtc2	4.68889e-39	0.575197	0.533	0.267	1.1093e-34
Akap1	1.09584e-20	0.305469	0.322	0.325	2.59254e-16	Rods		Slc4a10	4.79863e-39	0.396542	0.392	0.16	1.13526e-34
Fam204a	1.82183e-20	0.264601	0.565	0.667	4.31008e-16	Rods		Junb	6.35619e-39	-0.939021	0.554	0.674	1.50375e-34
Wdr20	2.22003e-20	0.307896	0.482	0.55	5.25215e-16	Rods		Tpt1	7.6687e-39	0.306549	1	0.985	1.81426e-34
Tapt1	3.78927e-20	0.297484	0.425	0.461	8.96467e-16	Rods		Syt9	7.97276e-39	0.39585	0.723	0.409	1.8862e-34
Eml3	4.37605e-20	0.269046	0.255	0.237	1.03529e-15	Rods		Nav2	7.98472e-39	0.568737	0.498	0.249	1.88903e-34
Ube2j1	4.85476e-20	0.279597	0.522	0.604	1.14854e-15	Rods		Ube2e1	9.80583e-39	0.350357	0.639	0.326	2.31986e-34
Dcun1d3	5.23702e-20	0.308141	0.318	0.314	1.23897e-15	Rods		D16Ertd472e	1.07194e-38	0.315931	0.508	0.231	2.536e-34
Acaca	2.20669e-19	0.287884	0.508	0.573	5.22059e-15	Rods		Epb41l2	1.24484e-38	-0.442223	0.965	0.95	2.94504e-34
Fkbp2	4.67e-19	0.29925	0.507	0.579	1.10483e-14	Rods		Hdgfl3	1.42425e-38	0.413236	0.845	0.531	3.36948e-34
Ift74	5.11699e-19	0.296922	0.44	0.486	1.21058e-14	Rods		Svil	1.65161e-38	-0.72349	0.306	0.507	3.90737e-34
Riok3	1.0713e-18	0.265433	0.514	0.599	2.53448e-14	Rods		Guca1b	1.66988e-38	0.408177	0.657	0.362	3.95059e-34
Lca5	1.27542e-18	0.286009	0.374	0.389	3.01739e-14	Rods		Hdac9	2.25848e-38	0.336103	0.916	0.665	5.34312e-34
Klhl18	4.77453e-18	0.284614	0.447	0.489	1.12956e-13	Rods		Csnk1e	2.31763e-38	0.277521	0.489	0.218	5.48306e-34
Pfkl	6.53389e-18	0.287769	0.455	0.511	1.54579e-13	Rods		Gnai3	3.26761e-38	0.270117	0.424	0.177	7.73052e-34
Dpm3	7.12864e-18	0.251427	0.574	0.683	1.68649e-13	Rods		Synpo2	3.64359e-38	-0.803441	0.485	0.642	8.62e-34
Tmem106c	1.4175e-17	0.297937	0.302	0.302	3.35351e-13	Rods		Wdr17	4.44917e-38	-0.630459	0.801	0.847	1.05259e-33
GFP	2.60328e-17	2.88217	0.957	0.995	6.15885e-13	Rods		Impg2	4.61957e-38	-0.431299	0.976	0.975	1.0929e-33
Gm5914	2.87197e-17	0.324966	0.42	0.461	6.7945e-13	Rods		Slc12a5	5.74926e-38	0.317954	0.62	0.307	1.36016e-33
Fam107b	3.6551e-17	0.283997	0.287	0.278	8.64723e-13	Rods		Ccser1	1.04203e-37	-0.661513	0.876	0.918	2.46524e-33
Pacsin2	4.04888e-17	0.264583	0.43	0.467	9.57883e-13	Rods		Cacnb2	1.17562e-37	-0.487466	0.954	0.972	2.78129e-33
Sun1	4.96326e-17	0.293655	0.362	0.385	1.17421e-12	Rods		Gm48551	1.4095e-37	-0.640774	0.268	0.474	3.3346e-33
Tjp2	6.13883e-17	0.254673	0.356	0.362	1.45233e-12	Rods		Tnrc6b	1.95719e-37	-0.435751	0.956	0.961	4.63032e-33
Fbxo36	1.6256e-16	0.298122	0.278	0.27	3.84584e-12	Rods		Cyfip2	2.3902e-37	0.251602	0.345	0.13	5.65473e-33
Man2a2	1.82711e-16	0.276797	0.452	0.511	4.32258e-12	Rods		Rpl22l1	2.63169e-37	0.419092	0.892	0.628	6.22605e-33
Paqr4	1.95344e-16	0.271141	0.276	0.269	4.62144e-12	Rods		Rdh8	4.74968e-37	-0.567964	0.115	0.337	1.12368e-32
Ctnna1	3.15457e-15	0.275633	0.41	0.446	7.46308e-11	Rods		Kctd1	4.87646e-37	0.268337	0.401	0.165	1.15367e-32
Zfp266	3.63601e-15	0.310622	0.441	0.507	8.60206e-11	Rods		Pqbp1	5.97664e-37	0.286175	0.449	0.195	1.41395e-32
Stk19	4.53084e-15	0.331982	0.373	0.406	1.07191e-10	Rods		Sorcs1	6.52108e-37	0.495701	0.37	0.156	1.54276e-32
Slc25a37	5.36454e-15	0.264224	0.386	0.413	1.26914e-10	Rods		Rab3ip	1.08403e-36	0.331978	0.641	0.328	2.56459e-32
Hibadh	5.82266e-15	0.263153	0.532	0.63	1.37752e-10	Rods		Phactr1	2.64032e-36	-0.473009	0.993	0.988	6.24646e-32
Gpr162	8.81451e-15	0.272658	0.299	0.3	2.08534e-10	Rods		Rpl6	2.71226e-36	0.31684	1	0.969	6.41666e-32
Dusp22	3.31775e-14	0.281432	0.379	0.408	7.84913e-10	Rods		Eif4g2	2.81778e-36	0.357254	0.991	0.886	6.6663e-32
Ipo5	3.39295e-14	0.330805	0.358	0.39	8.02703e-10	Rods		Rtl8b	2.9094e-36	0.260869	0.398	0.163	6.88306e-32
Coro2b	4.69554e-14	0.250822	0.29	0.286	1.11087e-09	Rods		Ap3m2	3.22596e-36	0.348095	0.613	0.315	7.63197e-32
Nucb2	7.67558e-14	0.264564	0.256	0.247	1.81589e-09	Rods		Ubtd1	3.93191e-36	-0.621528	0.452	0.596	9.30211e-32
BC027072	1.65393e-13	0.262252	0.262	0.252	3.91287e-09	Rods		Zcchc7	4.15348e-36	-0.55775	0.857	0.869	9.8263e-32
Sertad2	4.8538e-13	0.312916	0.407	0.435	1.14831e-08	Rods		Dpy30	4.18675e-36	0.40695	0.842	0.568	9.90502e-32
Mllt6	1.37606e-12	0.26308	0.348	0.375	3.25547e-08	Rods		Rpl7a	4.85677e-36	0.351846	0.982	0.859	1.14901e-31
Cers4	3.38964e-12	0.255508	0.508	0.579	8.01921e-08	Rods		Hcn1	5.90155e-36	-0.363514	1	0.999	1.39619e-31
Kif3b	6.82122e-12	0.272657	0.347	0.373	1.61376e-07	Rods		Mir124a-1hg	8.41543e-36	-0.392414	0.981	0.98	1.99092e-31
Hpcal1	1.32835e-11	0.252053	0.416	0.455	3.1426e-07	Rods		Klf12	1.52591e-35	0.403349	0.766	0.47	3.61001e-31
Rnf157	3.84783e-11	0.268351	0.427	0.48	9.10319e-07	Rods		Zfp428	1.57586e-35	0.310643	0.583	0.291	3.72816e-31
Usp6nl	9.90998e-11	0.258405	0.461	0.535	2.3445e-06	Rods		Klhl32	3.2922e-35	0.325997	0.392	0.168	7.7887e-31
Slc31a2	1.16362e-09	0.25171	0.347	0.378	2.7529e-05	Rods		Gnaz	3.59588e-35	-0.611536	0.191	0.399	8.50714e-31
Dhrs7	3.61454e-09	0.276173	0.303	0.322	8.55129e-05	Rods		Zfp654	3.60863e-35	-0.563046	0.825	0.844	8.53729e-31
Ofd1	5.8023e-08	0.261021	0.285	0.299	0.00137271	Rods		Sec22a	4.28246e-35	-0.603073	0.58	0.669	1.01315e-30
Ctsf	6.66433e-08	0.26407	0.38	0.436	0.00157665	Rods		B3galt1	5.656e-35	0.469666	0.96	0.819	1.3381e-30
Lsm2	9.09136e-08	0.287866	0.326	0.364	0.00215083	Rods		Gm26917	7.08352e-35	0.253797	0.452	0.2	1.67582e-30
Taok3	3.0803e-07	0.280954	0.39	0.447	0.00728738	Rods		Rpl14	2.70105e-34	0.317732	0.988	0.901	6.39015e-30
Fam69a	1.52371e-06	0.256282	0.359	0.398	0.0360478	Rods		Retreg2	2.76359e-34	0.307277	0.626	0.322	6.5381e-30
Stk39	2.2379e-06	0.25913	0.403	0.464	0.0529442	Rods		Tuba1a	3.14354e-34	0.471059	0.894	0.677	7.43698e-30
Ric1	2.71167e-06	0.250811	0.371	0.425	0.0641526	Rods		Alpl	3.9258e-34	-0.575263	0.189	0.394	9.28765e-30
Mdm2	4.0869e-06	0.267946	0.401	0.478	0.0966879	Rods		Dhx32	4.26596e-34	0.290375	0.511	0.245	1.00924e-29
Ispd	7.30697e-06	0.250665	0.307	0.325	0.172868	Rods		B4galt1	4.78207e-34	-0.628644	0.549	0.653	1.13134e-29
Plcb1	0.000270766	0.425569	0.395	0.42	1	Rods		Fgf2	5.05222e-34	-0.727063	0.448	0.593	1.19525e-29
Nupr1	0	4.19771	0.946	0.399	0	MG		Sgce	5.2204e-34	0.284342	0.442	0.2	1.23504e-29
Cp	0	3.33281	0.946	0.183	0	MG		Auts2	6.5264e-34	0.539154	0.726	0.449	1.54402e-29
Slc1a3	0	3.0948	0.941	0.19	0	MG		Cdh20	8.93224e-34	0.69742	0.479	0.236	2.11319e-29
Sat1	0	3.0095	0.957	0.405	0	MG		Cdk2ap2	1.02868e-33	-0.631983	0.604	0.7	2.43366e-29
Sntg1	0	2.72508	0.895	0.175	0	MG		Tcf4	1.43152e-33	0.380571	0.953	0.814	3.3867e-29
Sparc	0	2.70197	0.914	0.18	0	MG		Med12l	1.94066e-33	0.255991	0.415	0.18	4.5912e-29
Gnai2	0	2.64199	0.951	0.217	0	MG		Atf3	2.19734e-33	-0.779808	0.187	0.388	5.19847e-29
Cryab	0	2.61196	0.916	0.316	0	MG		Ktn1	2.25684e-33	0.307579	0.99	0.927	5.33923e-29
Rlbp1	0	2.59391	0.867	0.178	0	MG		Gas6	2.66909e-33	-0.587005	0.327	0.507	6.31452e-29
Ftl1	0	2.5936	1	0.956	0	MG		Nedd4	2.9036e-33	0.333124	0.971	0.835	6.86933e-29
Tpt1	0	2.58297	0.998	0.99	0	MG		Adgrv1	3.41713e-33	0.382177	0.963	0.875	8.08425e-29
Vim	0	2.57604	0.863	0.176	0	MG		Fbxl7	4.17904e-33	-1.05894	0.645	0.732	9.88678e-29
Trpm3	0	2.48783	0.957	0.261	0	MG		Pde6d	5.0073e-33	0.370729	0.878	0.626	1.18463e-28
Npy	0	2.45878	0.676	0.109	0	MG		Tmem176b	5.04317e-33	0.386377	0.853	0.558	1.19311e-28
Slc35f1	0	2.41909	0.926	0.188	0	MG		Ssrp1	5.0498e-33	0.325821	0.588	0.304	1.19468e-28
Cox6a2	0	2.41717	0.711	0.103	0	MG		Rpl13	6.14242e-33	0.280265	1	0.971	1.45317e-28
Rbp1	0	2.39464	0.753	0.138	0	MG		Ptpn1	6.55989e-33	0.341212	0.661	0.381	1.55194e-28
B2m	0	2.37316	0.919	0.187	0	MG		Acadm	8.4072e-33	0.304379	0.513	0.249	1.98898e-28
Rps12	0	2.32066	0.998	0.944	0	MG		Rps5	8.69755e-33	0.324535	0.987	0.91	2.05767e-28
Fxyd1	0	2.29658	0.829	0.091	0	MG		Txn1	9.9454e-33	0.37116	0.761	0.467	2.35288e-28
Olfm2	0	2.18988	0.878	0.193	0	MG		Rtbdn	1.05317e-32	-0.506881	0.881	0.874	2.49159e-28
Mt2	0	2.18335	0.796	0.192	0	MG		Sumo2	1.24758e-32	0.328109	0.999	0.894	2.95152e-28
Cd9	0	2.16043	0.913	0.103	0	MG		mt-Co3	1.75234e-32	0.270559	1	1	4.1457e-28
Zfp36l1	0	2.13784	0.888	0.112	0	MG		Lrrc4c	2.15669e-32	1.18972	0.486	0.276	5.10229e-28
Gstp1	0	2.12176	0.875	0.198	0	MG		Kank1	2.24956e-32	-0.66843	0.426	0.573	5.322e-28
Rplp0	0	2.03569	0.998	0.871	0	MG		Unc5d	2.69373e-32	-1.01958	0.532	0.665	6.37282e-28
Tgfb2	0	1.97175	0.962	0.179	0	MG		E130308A19Rik	3.64e-32	0.369642	0.797	0.514	8.61151e-28
Hes1	0	1.94734	0.817	0.091	0	MG		Bicdl1	3.96793e-32	-0.61133	0.611	0.675	9.38732e-28
Tsc22d4	0	1.94378	0.926	0.186	0	MG		Dnajb2	6.68932e-32	0.283288	0.524	0.261	1.58256e-27
Cebpb	0	1.90517	0.883	0.155	0	MG		Gramd1b	7.2214e-32	-0.558928	0.649	0.702	1.70844e-27
Dkk3	0	1.84063	0.854	0.12	0	MG		Vmp1	1.08043e-31	0.382192	0.825	0.561	2.55608e-27
Akap12	0	1.78331	0.661	0.05	0	MG		Gucy2e	1.16861e-31	-0.559827	0.351	0.513	2.7647e-27
Ass1	0	1.75226	0.809	0.047	0	MG		Nenf	1.47242e-31	0.31667	0.698	0.396	3.48345e-27
Itm2a	0	1.74389	0.516	0.071	0	MG		Ppp3cc	1.62111e-31	-0.572328	0.72	0.763	3.83522e-27
Npas3	0	1.70761	0.89	0.139	0	MG		Macf1	1.67162e-31	0.362891	0.875	0.641	3.95472e-27
Etl4	0	1.69705	0.615	0.077	0	MG		Prph	1.70954e-31	0.587353	0.256	0.095	4.04443e-27
Spon1	0	1.68498	0.906	0.162	0	MG		Rpl15	2.41196e-31	0.317243	0.993	0.941	5.70622e-27
Sorcs1	0	1.67649	0.906	0.256	0	MG		Rpl12	2.6667e-31	0.329868	0.973	0.832	6.30888e-27
Rpl23	0	1.66377	1	0.987	0	MG		Tmco3	2.80182e-31	0.2723	0.446	0.21	6.62855e-27
Hsp90ab1	0	1.65212	0.998	0.896	0	MG		Rps6ka3	2.86112e-31	0.374795	0.744	0.457	6.76883e-27
Sntb1	0	1.62676	0.76	0.057	0	MG		Rbp3	2.9207e-31	-0.530347	0.904	0.907	6.90978e-27
Myof	0	1.62614	0.86	0.033	0	MG		Stox2	2.98065e-31	0.345521	0.744	0.456	7.05162e-27
Sema5a	0	1.55845	0.898	0.09	0	MG		Tcf20	4.44854e-31	0.360896	0.788	0.499	1.05244e-26
Kdr	0	1.54034	0.765	0.101	0	MG		Tuba1b	4.80603e-31	0.314374	0.76	0.451	1.13701e-26
Luzp2	0	1.54026	0.752	0.055	0	MG		Bcl9	5.38327e-31	0.287657	0.513	0.258	1.27358e-26
Pard3b	0	1.53516	0.908	0.181	0	MG		St8sia1	7.15986e-31	-0.68033	0.339	0.511	1.69388e-26
Ctnna3	0	1.5278	0.487	0.059	0	MG		Sptbn1	8.57739e-31	0.328321	0.775	0.488	2.02924e-26
Eif4ebp1	0	1.51881	0.832	0.093	0	MG		Socs3	9.50244e-31	0.327224	0.393	0.181	2.24809e-26
Npc2	0	1.50898	0.926	0.224	0	MG		Icmt	1.05927e-30	-0.546582	0.323	0.492	2.50602e-26
App	0	1.49421	0.997	0.423	0	MG		Slc25a4	1.08599e-30	0.308672	0.999	0.962	2.56924e-26
Col9a1	0	1.48009	0.586	0.055	0	MG		Rnf187	1.1125e-30	0.269619	0.602	0.311	2.63196e-26
Rhoc	0	1.46097	0.877	0.056	0	MG		Med27	1.30042e-30	0.257883	0.624	0.33	3.07653e-26
Cdkn1a	0	1.45786	0.757	0.093	0	MG		Maged1	1.48008e-30	0.269771	0.598	0.313	3.50157e-26
Basp1	0	1.4568	0.962	0.28	0	MG		Vdac1	1.59634e-30	0.370841	0.956	0.777	3.77661e-26
H2-K1	0	1.44224	0.719	0.116	0	MG		Armc9	1.91217e-30	-0.582826	0.408	0.541	4.52381e-26
Car14	0	1.43275	0.794	0.055	0	MG		Mmd	2.11356e-30	-0.592154	0.449	0.578	5.00025e-26
Atp1b3	0	1.42764	0.906	0.161	0	MG		Nrip1	2.23716e-30	0.402984	0.872	0.641	5.29268e-26
Wipi1	0	1.40896	0.867	0.152	0	MG		C130073E24Rik	2.65175e-30	0.411561	0.433	0.21	6.27351e-26
Mgll	0	1.3989	0.799	0.073	0	MG		Rpl19	4.74384e-30	0.271085	0.999	0.971	1.1223e-25
Mpzl1	0	1.36224	0.89	0.124	0	MG		Fam184b	5.30799e-30	0.347422	0.542	0.292	1.25576e-25
Gpr37	0	1.36017	0.773	0.088	0	MG		Zfp704	9.2727e-30	0.284282	0.423	0.198	2.19373e-25
Clic1	0	1.33929	0.888	0.062	0	MG		Dync1i2	1.30099e-29	0.336323	0.944	0.747	3.07787e-25
Anxa5	0	1.33889	0.863	0.05	0	MG		Rora	1.30914e-29	0.317834	0.984	0.882	3.09716e-25
Ppp1r15a	0	1.32196	0.829	0.162	0	MG		Pkm	1.31257e-29	0.279643	0.996	0.953	3.10529e-25
Fabp3	0	1.32117	0.737	0.089	0	MG		Ccdc126	2.38159e-29	-0.533444	0.61	0.672	5.63436e-25
Klf6	0	1.3199	0.855	0.161	0	MG		Ccni	2.42722e-29	0.314604	0.71	0.413	5.74232e-25
Pax6	0	1.30543	0.926	0.164	0	MG		Rpl28	2.61231e-29	0.263089	0.993	0.963	6.18021e-25
Sox2	0	1.28937	0.801	0.037	0	MG		Fkbp3	2.79285e-29	0.340032	0.848	0.589	6.60734e-25
Lhx2	0	1.28575	0.836	0.035	0	MG		Tspan5	3.59861e-29	0.357286	0.948	0.794	8.5136e-25
Galnt18	0	1.28507	0.712	0.08	0	MG		Trim2	4.36512e-29	-0.579791	0.604	0.681	1.0327e-24
Sema6a	0	1.28154	0.868	0.088	0	MG		Scamp5	5.22039e-29	-0.521246	0.436	0.557	1.23504e-24
Ncald	0	1.27363	0.812	0.111	0	MG		Clu	5.29827e-29	-0.516318	0.756	0.811	1.25347e-24
Pdlim5	0	1.27139	0.914	0.262	0	MG		Esrrg	5.75422e-29	0.400911	0.704	0.433	1.36133e-24
Etv1	0	1.27011	0.788	0.026	0	MG		C230004F18Rik	6.60078e-29	0.312527	0.302	0.126	1.56161e-24
Adamts1	0	1.24984	0.699	0.077	0	MG		Nlk	8.56908e-29	0.302413	0.997	0.981	2.02727e-24
Apoc1	0	1.24902	0.395	0.039	0	MG		Rps26	1.04039e-28	0.294009	0.991	0.943	2.46137e-24
Fnbp1	0	1.24577	0.877	0.198	0	MG		Pbx1	1.19952e-28	0.362812	0.929	0.787	2.83782e-24
Spred1	0	1.24538	0.916	0.155	0	MG		Chrm3	1.31557e-28	-1.20257	0.337	0.493	3.11237e-24
Espn	0	1.24152	0.678	0.054	0	MG		Bbs5	1.76798e-28	-0.560297	0.44	0.556	4.18268e-24
Sgcd	0	1.2162	0.53	0.054	0	MG		Atp1a3	1.89206e-28	-0.371749	0.953	0.937	4.47623e-24
Crot	0	1.20941	0.824	0.121	0	MG		Cd63	2.28805e-28	-0.606081	0.654	0.71	5.41308e-24
Nfia	0	1.20331	0.921	0.199	0	MG		Vax2os	2.67873e-28	-0.878589	0.337	0.478	6.33733e-24
Nfib	0	1.18794	0.949	0.264	0	MG		Fnip2	2.76722e-28	0.309168	0.636	0.366	6.54668e-24
Ppp1r14b	0	1.18434	0.929	0.153	0	MG		Atp6v1f	2.89749e-28	0.356472	0.9	0.675	6.85488e-24
Msn	0	1.1816	0.799	0.031	0	MG		Slc44a1	3.41482e-28	-0.502965	0.769	0.79	8.07878e-24
Sipa1l1	0	1.17487	0.887	0.115	0	MG		Pla2r1	3.46651e-28	-0.628522	0.152	0.34	8.20106e-24
Ccnd2	0	1.16008	0.615	0.027	0	MG		Rpl34	3.50299e-28	0.259838	1	0.968	8.28737e-24
Adm	0	1.1367	0.549	0.017	0	MG		Bicd1	4.43689e-28	0.264789	0.571	0.309	1.04968e-23
Zfp36	0	1.12315	0.609	0.08	0	MG		Nucks1	4.8406e-28	0.35048	0.831	0.581	1.14519e-23
2025-09-08	0	1.12245	0.888	0.171	0	MG		Pard3	5.75792e-28	0.337722	0.813	0.545	1.36221e-23
Serpinh1	0	1.11188	0.812	0.029	0	MG		Rps4x	7.93025e-28	0.302237	0.996	0.943	1.87614e-23
Ndrg2	0	1.11069	0.711	0.054	0	MG		Nme1	8.64131e-28	0.32831	0.803	0.522	2.04436e-23
Vav3	0	1.10911	0.584	0.071	0	MG		Serf2	9.01988e-28	0.313321	0.994	0.943	2.13392e-23
Rgs16	0	1.10766	0.641	0.042	0	MG		Ptma	1.03235e-27	0.336329	0.984	0.892	2.44232e-23
Timp2	0	1.09333	0.722	0.076	0	MG		Pigp	3.3049e-27	0.296398	0.691	0.399	7.81874e-23
Plekho1	0	1.07891	0.822	0.082	0	MG		Nectin1	3.51449e-27	0.269073	0.577	0.315	8.31457e-23
Gyg	0	1.07372	0.771	0.075	0	MG		Kpna4	3.68947e-27	0.379753	0.76	0.51	8.72856e-23
Aebp1	0	1.05975	0.446	0.015	0	MG		Atpif1	3.74134e-27	0.331898	0.919	0.737	8.85125e-23
Sh3bgrl	0	1.05612	0.829	0.106	0	MG		Zbtb7c	3.79628e-27	-0.521247	0.763	0.838	8.98124e-23
Klf13	0	1.05246	0.842	0.08	0	MG		Xylt1	3.9382e-27	0.300888	0.703	0.438	9.317e-23
Ddah1	0	1.05145	0.791	0.114	0	MG		Epha7	4.79287e-27	0.267659	0.423	0.205	1.1339e-22
Tox3	0	1.04919	0.888	0.223	0	MG		Osgep	5.18318e-27	0.374205	0.679	0.419	1.22624e-22
Pdpn	0	1.04462	0.651	0.068	0	MG		Numb	5.72751e-27	0.314077	0.784	0.509	1.35501e-22
Ninj1	0	1.04315	0.727	0.037	0	MG		Atxn10	7.7277e-27	0.334925	0.829	0.576	1.82822e-22
Ppp1r1a	0	1.04295	0.785	0.125	0	MG		Cox7b	7.77832e-27	-0.370455	0.973	0.937	1.8402e-22
Ccnd1	0	1.04026	0.668	0.05	0	MG		Ttc8	8.32147e-27	-0.467328	0.791	0.801	1.96869e-22
Tulp3	0	1.03864	0.793	0.137	0	MG		H2afj	1.13734e-26	0.318787	0.822	0.536	2.69072e-22
Rgs6	0	1.02634	0.503	0.051	0	MG		Megf9	1.33231e-26	0.278513	0.524	0.282	3.15197e-22
E130114P18Rik	0	1.02213	0.775	0.07	0	MG		Anapc16	1.50833e-26	0.279855	0.649	0.376	3.56841e-22
Epha4	0	1.02083	0.775	0.064	0	MG		Cacybp	2.85591e-26	0.331205	0.747	0.478	6.7565e-22
Dusp16	0	1.01615	0.785	0.092	0	MG		Cox5b	2.87209e-26	-0.35688	0.988	0.953	6.79479e-22
Tagln2	0	1.01112	0.503	0.03	0	MG		Dmd	3.53838e-26	-0.267691	1	1	8.37111e-22
Pla2g16	0	1.0056	0.783	0.036	0	MG		Ppm1e	4.01719e-26	0.358047	0.703	0.443	9.50387e-22
Nfix	0	1.00396	0.873	0.135	0	MG		Pkp4	5.63976e-26	0.279111	0.514	0.274	1.33425e-21
Rras	0	0.998181	0.748	0.028	0	MG		Pitpnc1	6.52094e-26	-0.536428	0.73	0.793	1.54272e-21
Sulf1	0	0.997514	0.553	0.027	0	MG		Crtc3	6.86177e-26	-0.579974	0.527	0.606	1.62336e-21
Igfbp5	0	0.992398	0.276	0.018	0	MG		Ndufb9	7.86567e-26	-0.312073	0.985	0.946	1.86086e-21
Slc25a39	0	0.984486	0.893	0.175	0	MG		Rnf20	8.04436e-26	0.253261	0.564	0.305	1.90313e-21
Grb10	0	0.980625	0.844	0.167	0	MG		Kirrel	1.00333e-25	-0.529186	0.156	0.329	2.37367e-21
Arap2	0	0.976405	0.806	0.119	0	MG		Mat2a	1.01352e-25	-0.615301	0.887	0.852	2.39779e-21
Ctsc	0	0.973586	0.676	0.041	0	MG		Map4k3	1.0222e-25	-0.504109	0.764	0.792	2.41833e-21
Atf5	0	0.971211	0.791	0.121	0	MG		Scube1	1.05899e-25	-0.663247	0.278	0.443	2.50535e-21
Mmp11	0	0.966864	0.475	0.027	0	MG		Cdc42	1.47888e-25	0.304525	0.926	0.72	3.49873e-21
Nudt4	0	0.963747	0.811	0.158	0	MG		Syap1	1.56394e-25	0.273598	0.663	0.388	3.69997e-21
Palld	0	0.963194	0.597	0.077	0	MG		Ahcyl1	1.75596e-25	-0.390469	0.884	0.874	4.15426e-21
Tmeff2	0	0.962098	0.599	0.058	0	MG		Rps15a	1.81616e-25	0.250051	0.997	0.953	4.29667e-21
Txnrd1	0	0.959384	0.753	0.128	0	MG		Gm48677	1.97788e-25	-0.537872	0.265	0.419	4.67926e-21
Rnd3	0	0.956365	0.658	0.073	0	MG		Gngt2	2.39601e-25	0.361612	0.96	0.774	5.66847e-21
Rhoj	0	0.955738	0.487	0.031	0	MG		Pde1c	2.45282e-25	0.364674	0.695	0.446	5.80288e-21
Tnfrsf12a	0	0.945037	0.586	0.046	0	MG		Rgs9	2.69682e-25	-0.320806	0.981	0.971	6.38013e-21
Slc7a11	0	0.935234	0.549	0.034	0	MG		Rpl5	3.10135e-25	0.260279	0.999	0.936	7.33717e-21
Prss23	0	0.933867	0.638	0.033	0	MG		Snx10	3.86572e-25	-0.546548	0.429	0.535	9.14553e-21
Tanc1	0	0.931254	0.862	0.143	0	MG		Pcbp3	4.092e-25	-0.353855	0.975	0.97	9.68085e-21
Gpx8	0	0.917758	0.633	0.018	0	MG		Cplx3	4.6633e-25	0.4065	0.925	0.742	1.10324e-20
Sash1	0	0.91316	0.776	0.059	0	MG		Robo2	4.69267e-25	0.483741	0.42	0.222	1.11019e-20
Pon2	0	0.910673	0.775	0.028	0	MG		Rbbp4	5.36455e-25	0.301314	0.845	0.595	1.26915e-20
Capns1	0	0.904454	0.88	0.2	0	MG		Rps6	5.42882e-25	0.280885	0.976	0.863	1.28435e-20
Dusp6	0	0.903281	0.648	0.049	0	MG		Ywhab	5.77665e-25	0.32761	0.829	0.579	1.36664e-20
Ccnd3	0	0.893024	0.73	0.113	0	MG		Myl6	1.00692e-24	0.308936	0.978	0.875	2.38217e-20
Chl1	0	0.891972	0.497	0.042	0	MG		Zkscan1	1.04896e-24	0.313207	0.801	0.546	2.48162e-20
Atp6v0e	0	0.889192	0.865	0.166	0	MG		Dhrs3	1.37492e-24	-0.499407	0.191	0.357	3.2528e-20
Phgdh	0	0.886506	0.635	0.039	0	MG		Snrpe	1.54111e-24	0.336593	0.834	0.59	3.64595e-20
S100a1	0	0.884968	0.559	0.074	0	MG		Skp1a	2.27425e-24	0.30422	0.811	0.566	5.38042e-20
Cyb5r1	0	0.878005	0.715	0.146	0	MG		Syngr1	2.68585e-24	-0.472065	0.579	0.647	6.35418e-20
Ildr2	0	0.873473	0.655	0.036	0	MG		Selenbp1	3.00716e-24	-0.515659	0.119	0.288	7.11434e-20
Dock1	0	0.867947	0.76	0.11	0	MG		Usp6nl	3.05385e-24	-0.539887	0.499	0.586	7.22479e-20
Osbpl3	0	0.866785	0.748	0.048	0	MG		Nop10	3.29823e-24	0.310699	0.816	0.558	7.80296e-20
Itgb8	0	0.866229	0.515	0.037	0	MG		Pmvk	3.56724e-24	-0.559197	0.414	0.524	8.43937e-20
Ptprj	0	0.863106	0.643	0.067	0	MG		Cdhr1	6.33293e-24	-0.351938	0.931	0.906	1.49824e-19
Col23a1	0	0.855731	0.546	0.074	0	MG		4930419G24Rik	7.49206e-24	-0.567182	0.37	0.503	1.77247e-19
Mgst1	0	0.848465	0.52	0.029	0	MG		Chsy1	7.71591e-24	-0.512841	0.541	0.612	1.82543e-19
Txndc17	0	0.844913	0.901	0.226	0	MG		Cecr2	8.09435e-24	-0.440602	0.931	0.898	1.91496e-19
Plagl1	0	0.842622	0.735	0.115	0	MG		Pcolce	8.42796e-24	-0.584561	0.303	0.456	1.99389e-19
Ddr1	0	0.837197	0.806	0.094	0	MG		Ndufv3	1.04957e-23	0.267962	1	0.957	2.48308e-19
Cald1	0	0.832719	0.709	0.08	0	MG		Nsd2	1.32639e-23	0.252968	0.666	0.402	3.13798e-19
Pmp22	0	0.814629	0.653	0.026	0	MG		Tacc2	1.37925e-23	-0.521494	0.47	0.576	3.26302e-19
Samd5	0	0.804946	0.444	0.039	0	MG		Hnrnpf	1.54008e-23	-0.395592	0.826	0.831	3.64351e-19
Creb5	0	0.80474	0.581	0.078	0	MG		Ahr	2.01978e-23	-0.530719	0.627	0.694	4.77841e-19
Metrn	0	0.803613	0.628	0.038	0	MG		Clcn3	2.07422e-23	-0.369334	0.943	0.931	4.90719e-19
Hexa	0	0.796613	0.793	0.139	0	MG		Pgk1	2.23336e-23	-0.430936	0.847	0.827	5.28369e-19
Tcf7l2	0	0.796529	0.76	0.101	0	MG		Mrpl49	2.6777e-23	0.28723	0.667	0.412	6.33491e-19
Cobl	0	0.794632	0.694	0.03	0	MG		Agbl4	3.36787e-23	0.324661	0.482	0.264	7.9677e-19
Clic4	0	0.791479	0.799	0.151	0	MG		Gtf2h5	3.88439e-23	0.319209	0.747	0.489	9.18969e-19
Gng12	0	0.791214	0.804	0.121	0	MG		Hnrnpab	6.48639e-23	0.284109	0.739	0.466	1.53455e-18
Polg	0	0.788655	0.696	0.102	0	MG		Uqcrq	7.05168e-23	-0.310087	0.993	0.966	1.66829e-18
Maf	0	0.788057	0.697	0.073	0	MG		Kdm4c	7.71187e-23	0.281445	0.991	0.948	1.82447e-18
Vegfb	0	0.787498	0.811	0.149	0	MG		Rab28	1.18626e-22	-0.3869	0.857	0.837	2.80645e-18
Ntn4	0	0.783649	0.525	0.024	0	MG		Atf4	1.38566e-22	-0.472329	0.773	0.754	3.27818e-18
Ctnnbip1	0	0.783203	0.745	0.129	0	MG		Kras	1.50477e-22	-0.498137	0.652	0.663	3.55999e-18
Irak2	0	0.782291	0.589	0.035	0	MG		Galnt10	1.52929e-22	-0.464673	0.125	0.287	3.61798e-18
Idh2	0	0.781847	0.776	0.118	0	MG		Nt5e	1.62786e-22	-0.553209	0.378	0.498	3.85119e-18
Psme1	0	0.779186	0.827	0.134	0	MG		Fkbp4	1.63651e-22	0.278903	0.801	0.536	3.87166e-18
Pla2g12a	0	0.778342	0.752	0.136	0	MG		Yy1	1.73098e-22	0.278933	0.726	0.467	4.09514e-18
S1pr3	0	0.777512	0.579	0.037	0	MG		Tjp2	1.97225e-22	-0.528276	0.303	0.439	4.66594e-18
Flna	0	0.775922	0.66	0.055	0	MG		Rpl7	2.06069e-22	0.260154	0.996	0.924	4.87518e-18
Etv5	0	0.7707	0.729	0.05	0	MG		Otub1	2.0957e-22	0.272725	0.592	0.344	4.95802e-18
Cited4	0	0.769953	0.564	0.027	0	MG		Nxnl1	2.20318e-22	-0.478174	0.208	0.37	5.21229e-18
Agt	0	0.76375	0.472	0.026	0	MG		Xiap	2.28302e-22	0.310635	0.86	0.625	5.40116e-18
Cth	0	0.763487	0.661	0.066	0	MG		Npm1	2.52509e-22	0.304534	0.882	0.676	5.97386e-18
Ppfibp2	0	0.762131	0.599	0.013	0	MG		Eef1b2	2.86511e-22	0.277686	0.87	0.655	6.77828e-18
Arhgap42	0	0.759234	0.691	0.036	0	MG		Prkar1a	4.07992e-22	0.285859	0.705	0.448	9.65228e-18
Ust	0	0.752009	0.605	0.028	0	MG		Morf4l1	4.31411e-22	0.274196	0.946	0.787	1.02063e-17
Aprt	0	0.749956	0.829	0.178	0	MG		Tmem256	5.71496e-22	0.283584	0.842	0.574	1.35205e-17
St3gal6	0	0.741418	0.51	0.019	0	MG		Card19	6.33235e-22	-0.472057	0.228	0.372	1.49811e-17
Pde3b	0	0.732264	0.554	0.065	0	MG		Igsf11	7.38647e-22	-0.455105	0.865	0.859	1.74749e-17
Tnc	0	0.727265	0.365	0.025	0	MG		Dynll2	7.40462e-22	0.290358	0.728	0.473	1.75178e-17
Pcdh11x	0	0.724321	0.502	0.061	0	MG		Rps3a1	9.66103e-22	0.259156	0.996	0.957	2.28561e-17
Hmga2	0	0.721213	0.308	0.015	0	MG		Akt3	1.228e-21	0.307187	0.857	0.641	2.9052e-17
Lrrfip1	0	0.718687	0.719	0.104	0	MG		Gm15706	1.29112e-21	-0.511837	0.208	0.351	3.05452e-17
Irx5	0	0.715682	0.594	0.016	0	MG		Ppp2r3a	1.46596e-21	0.271543	0.863	0.608	3.46817e-17
Kit	0	0.71504	0.548	0.025	0	MG		Tnik	1.48862e-21	0.31796	0.568	0.347	3.52178e-17
Gsta4	0	0.714779	0.558	0.049	0	MG		Mrpl52	1.81356e-21	0.289228	0.751	0.491	4.29052e-17
Bdnf	0	0.713422	0.567	0.056	0	MG		A930003A15Rik	2.22895e-21	-0.516865	0.68	0.705	5.27325e-17
Itgav	0	0.710194	0.72	0.104	0	MG		Ywhae	2.72249e-21	0.252231	0.996	0.933	6.44087e-17
Smad3	0	0.708031	0.633	0.055	0	MG		Rfx2	2.7288e-21	-0.496853	0.284	0.418	6.4558e-17
Lgals1	0	0.705487	0.431	0.035	0	MG		Hint1	2.96814e-21	0.280674	0.931	0.754	7.02203e-17
2900052N01Rik	0	0.704914	0.416	0.025	0	MG		Sptssa	3.25849e-21	0.319342	0.832	0.594	7.70894e-17
Lhfpl2	0	0.695814	0.633	0.035	0	MG		Atxn1	3.46002e-21	-0.428029	0.959	0.948	8.18571e-17
Adam12	0	0.695442	0.37	0.028	0	MG		Anp32e	4.37332e-21	0.254679	0.993	0.92	1.03464e-16
Lrrc8c	0	0.695306	0.567	0.03	0	MG		Nfic	4.56217e-21	-0.443131	0.729	0.743	1.07932e-16
Egfr	0	0.688203	0.493	0.021	0	MG		Rpl23a	5.88615e-21	0.270237	0.996	0.919	1.39255e-16
Cd44	0	0.686172	0.449	0.038	0	MG		Ccndbp1	6.72056e-21	0.287974	0.776	0.52	1.58995e-16
Lyn	0	0.683693	0.539	0.066	0	MG		Cct2	6.79612e-21	0.275987	0.781	0.531	1.60783e-16
S100a16	0	0.682764	0.484	0.028	0	MG		AI847159	8.72544e-21	-0.50928	0.48	0.585	2.06427e-16
Hmox1	0	0.681927	0.617	0.048	0	MG		Slc6a6	8.84895e-21	-0.502553	0.442	0.552	2.09349e-16
Traf5	0	0.680824	0.561	0.083	0	MG		Rpl10	8.94218e-21	0.283377	0.959	0.775	2.11554e-16
Ppfibp1	0	0.675156	0.681	0.065	0	MG		Cox5a	9.08227e-21	-0.321149	0.963	0.918	2.14868e-16
Klf3	0	0.674145	0.762	0.12	0	MG		Dixdc1	9.59191e-21	0.303052	0.831	0.591	2.26925e-16
Plpp3	0	0.673545	0.492	0.041	0	MG		Neurod1	1.1972e-20	0.263675	1	0.99	2.83234e-16
Fam49a	0	0.670597	0.643	0.029	0	MG		Ppp1cc	1.29795e-20	0.288108	0.92	0.753	3.0707e-16
S100a11	0	0.667601	0.449	0.022	0	MG		Llgl2	1.38233e-20	-0.47053	0.392	0.495	3.27033e-16
Mmp14	0	0.666226	0.66	0.032	0	MG		Clasp1	2.10504e-20	-0.437896	0.732	0.75	4.98011e-16
Sox6	0	0.660577	0.674	0.109	0	MG		Pmm1	4.57824e-20	-0.4561	0.548	0.593	1.08312e-15
Grn	0	0.658886	0.645	0.086	0	MG		Dnaja1	4.81988e-20	0.282398	0.866	0.627	1.14029e-15
Arhgdia	0	0.65798	0.803	0.139	0	MG		Lin7b	4.82133e-20	-0.569305	0.278	0.402	1.14063e-15
Gstm1	0	0.656482	0.558	0.029	0	MG		Btrc	5.24236e-20	0.278985	0.813	0.592	1.24024e-15
Itgb5	0	0.654235	0.717	0.093	0	MG		Eif3e	5.58634e-20	0.286573	0.853	0.61	1.32162e-15
Ptchd1	0	0.653767	0.508	0.021	0	MG		Pacsin2	9.66073e-20	-0.495189	0.432	0.517	2.28554e-15
Id2	0	0.653628	0.452	0.039	0	MG		Wdr26	1.09006e-19	0.2628	0.735	0.49	2.57887e-15
Bhlhe40	0	0.65333	0.607	0.047	0	MG		Egr1	1.17363e-19	-1.35652	0.485	0.547	2.77658e-15
Sox9	0	0.65098	0.498	0.053	0	MG		Arl6	1.22168e-19	-0.329204	0.962	0.947	2.89024e-15
Dpyd	0	0.649973	0.535	0.03	0	MG		Pitpna	1.31676e-19	0.268649	0.778	0.521	3.1152e-15
Fgfr1	0	0.648522	0.615	0.03	0	MG		Spry2	1.33083e-19	-0.488519	0.345	0.451	3.14847e-15
Adamts5	0	0.647529	0.465	0.048	0	MG		Slc25a5	1.34448e-19	-0.366996	0.904	0.859	3.18077e-15
Arhgap6	0	0.647368	0.438	0.017	0	MG		Rhot1	1.3491e-19	-0.404157	0.742	0.759	3.1917e-15
Litaf	0	0.646083	0.618	0.032	0	MG		Ptov1	1.43909e-19	0.282016	0.8	0.564	3.4046e-15
Rbfox2	0	0.644821	0.771	0.131	0	MG		Ubap1l	1.50506e-19	-0.314675	0.938	0.897	3.56066e-15
Camk1	0	0.644474	0.745	0.135	0	MG		Calm3	1.51862e-19	0.267932	0.75	0.505	3.59274e-15
Vamp8	0	0.643799	0.719	0.098	0	MG		Pag1	1.95925e-19	0.260654	0.614	0.383	4.6352e-15
Snhg18	0	0.642324	0.592	0.019	0	MG		Wdr66	2.22935e-19	0.276891	0.352	0.187	5.27419e-15
Crip2	0	0.641187	0.536	0.045	0	MG		Tmem65	3.13485e-19	0.287301	0.321	0.164	7.41643e-15
Flt1	0	0.640278	0.388	0.011	0	MG		Park2	3.49359e-19	-0.52376	0.803	0.812	8.26513e-15
Sorl1	0	0.638528	0.507	0.034	0	MG		Vezf1	3.68018e-19	0.263965	0.882	0.68	8.70657e-15
Adamts18	0	0.638102	0.365	0.022	0	MG		Whrn	3.76891e-19	-0.482481	0.404	0.498	8.9165e-15
Glmp	0	0.635577	0.77	0.136	0	MG		Slc17a7	4.01064e-19	-0.326175	0.854	0.88	9.48837e-15
Cyp2j6	0	0.633888	0.548	0.02	0	MG		Hook1	4.74702e-19	0.274826	0.791	0.58	1.12305e-14
S100a10	0	0.629422	0.303	0.018	0	MG		Mak	5.14046e-19	-0.334774	0.919	0.911	1.21613e-14
St8sia2	0	0.628732	0.497	0.061	0	MG		Psma4	6.1324e-19	0.254577	0.772	0.52	1.4508e-14
Atp2b4	0	0.626729	0.53	0.019	0	MG		Ext1	8.5031e-19	-0.519035	0.807	0.808	2.01166e-14
Zyx	0	0.623045	0.462	0.041	0	MG		Aldoa	9.60424e-19	-0.354638	0.982	0.961	2.27217e-14
Rcn1	0	0.622081	0.684	0.087	0	MG		Frmpd1	1.1048e-18	-0.533139	0.178	0.317	2.61374e-14
Nr2e1	0	0.620731	0.551	0.009	0	MG		Rsrp1	1.19191e-18	-0.383675	0.835	0.825	2.81983e-14
Lncpint	0	0.620728	0.613	0.084	0	MG		Hnrnpc	1.20906e-18	0.251829	0.894	0.718	2.86039e-14
Tnfrsf21	0	0.61748	0.515	0.03	0	MG		Thoc7	2.08737e-18	0.269294	0.915	0.712	4.93831e-14
Efhd2	0	0.616004	0.609	0.03	0	MG		Lgmn	2.27296e-18	-0.451282	0.526	0.573	5.37737e-14
Abat	0	0.607896	0.637	0.067	0	MG		Slc1a1	3.79611e-18	-0.521081	0.351	0.463	8.98084e-14
Cav1	0	0.605456	0.4	0.014	0	MG		Fabp5	4.67658e-18	0.332142	0.854	0.681	1.10639e-13
Mid1ip1	0	0.60226	0.643	0.087	0	MG		Tpr	4.83465e-18	0.267351	0.894	0.708	1.14378e-13
Lmna	0	0.601748	0.599	0.048	0	MG		Eif3c	6.21207e-18	0.290484	0.923	0.754	1.46965e-13
Ptprf	0	0.598966	0.727	0.085	0	MG		Antxr2	6.8591e-18	0.294729	0.895	0.734	1.62273e-13
Spc25	0	0.598057	0.285	0.012	0	MG		Tmem176a	7.45509e-18	0.251335	0.747	0.498	1.76373e-13
Klf4	0	0.595898	0.344	0.031	0	MG		Kif13a	8.28691e-18	-0.404777	0.829	0.82	1.96052e-13
Lrrc75a	0	0.594713	0.577	0.037	0	MG		Sdc4	8.74066e-18	-0.434145	0.202	0.332	2.06786e-13
Tead2	0	0.584601	0.602	0.017	0	MG		Rraga	9.26721e-18	-0.499368	0.822	0.771	2.19244e-13
Mertk	0	0.579275	0.442	0.01	0	MG		Nr4a1	1.07267e-17	-0.64715	0.275	0.391	2.53771e-13
Slitrk2	0	0.57921	0.49	0.031	0	MG		Myo10	1.34633e-17	-0.461686	0.848	0.843	3.18515e-13
Rest	0	0.576883	0.673	0.086	0	MG		Scg5	1.49133e-17	0.303835	0.856	0.695	3.52818e-13
Ptgds	0	0.570515	0.436	0.051	0	MG		Ankrd11	1.72276e-17	-0.360147	0.872	0.858	4.07571e-13
Necab2	0	0.569848	0.428	0.027	0	MG		Rax	2.23913e-17	0.285367	0.791	0.573	5.29733e-13
Nab2	0	0.569184	0.525	0.017	0	MG		E2f3	2.60573e-17	-0.483543	0.271	0.388	6.16464e-13
Cpeb1	0	0.567167	0.584	0.06	0	MG		Gadd45b	3.0858e-17	-0.490894	0.289	0.401	7.30039e-13
Msrb3	0	0.564744	0.52	0.03	0	MG		Cfl1	3.29664e-17	0.261425	0.875	0.677	7.79919e-13
Sowaha	0	0.561837	0.482	0.026	0	MG		Jazf1	3.32701e-17	-0.528055	0.635	0.666	7.87103e-13
Megf10	0	0.559632	0.549	0.046	0	MG		Snrpd1	3.43598e-17	0.25051	0.835	0.585	8.12885e-13
Sfxn1	0	0.556597	0.707	0.105	0	MG		Fance	3.52272e-17	-0.436825	0.437	0.515	8.33405e-13
Col4a1	0	0.553395	0.456	0.056	0	MG		Lmo1	4.03045e-17	-0.487591	0.362	0.47	9.53525e-13
Nr2f1	0	0.552866	0.638	0.048	0	MG		Plekha7	4.43863e-17	-0.455391	0.271	0.394	1.05009e-12
Col9a3	0	0.551238	0.373	0.025	0	MG		Pak2	4.52103e-17	0.262744	0.862	0.634	1.06958e-12
Col11a1	0	0.549061	0.36	0.02	0	MG		Zfp521	7.0631e-17	-0.496416	0.286	0.397	1.67099e-12
Plce1	0	0.547955	0.488	0.02	0	MG		Wwtr1	7.47059e-17	-0.520241	0.414	0.511	1.76739e-12
Vamp3	0	0.546761	0.711	0.109	0	MG		Cspp1	9.9689e-17	-0.383364	0.809	0.8	2.35844e-12
Mmgt2	0	0.546124	0.678	0.1	0	MG		Tle4	1.03565e-16	-0.461766	0.692	0.715	2.45015e-12
Tmem47	0	0.545956	0.556	0.05	0	MG		Gadd45a	1.06958e-16	-0.437454	0.271	0.386	2.53041e-12
Col4a5	0	0.54365	0.645	0.106	0	MG		Sik3	1.20325e-16	-0.421739	0.732	0.742	2.84665e-12
Elovl5	0	0.542892	0.602	0.069	0	MG		Acaca	1.21532e-16	-0.433969	0.611	0.652	2.87521e-12
Parva	0	0.54234	0.632	0.054	0	MG		H2-D1	1.48809e-16	-0.453297	0.371	0.466	3.52052e-12
Sh3pxd2b	0	0.537815	0.607	0.049	0	MG		Wasf3	1.51513e-16	-0.365644	0.725	0.735	3.58451e-12
Pvt1	0	0.536891	0.349	0.009	0	MG		Rapgef5	1.54611e-16	0.251982	0.735	0.511	3.65778e-12
Rgcc	0	0.535031	0.34	0.019	0	MG		Sorbs2	1.64044e-16	-0.541476	0.758	0.775	3.88095e-12
Acadl	0	0.533455	0.556	0.04	0	MG		Arhgef26	2.55259e-16	-0.442241	0.576	0.622	6.03893e-12
Vat1	0	0.533185	0.558	0.024	0	MG		Unc13b	3.26141e-16	-0.410781	0.823	0.817	7.71584e-12
Efemp1	0	0.533026	0.37	0.01	0	MG		Uhmk1	3.7044e-16	-0.421708	0.486	0.552	8.76388e-12
Mras	0	0.532527	0.691	0.112	0	MG		Casp3	5.3992e-16	0.251527	0.315	0.169	1.27734e-11
Pdgfc	0	0.52971	0.513	0.038	0	MG		Slc4a8	5.76457e-16	-0.425142	0.295	0.396	1.36378e-11
Ezr	0	0.529237	0.586	0.083	0	MG		Sertad2	7.72058e-16	-0.562476	0.465	0.538	1.82653e-11
P3h2	0	0.522541	0.523	0.058	0	MG		Dnah9	8.63352e-16	-0.605746	0.133	0.256	2.04252e-11
Met	0	0.522178	0.395	0.018	0	MG		Onecut2	9.76257e-16	-0.520565	0.317	0.43	2.30963e-11
Creb3l2	0	0.521728	0.556	0.058	0	MG		Glmn	9.77252e-16	-0.43382	0.71	0.694	2.31198e-11
Suclg2	0	0.520939	0.605	0.034	0	MG		Mbnl1	1.19753e-15	-0.4419	0.692	0.689	2.83312e-11
Zfp593	0	0.519885	0.638	0.086	0	MG		Msi2	1.4232e-15	-0.29604	0.956	0.951	3.36702e-11
Ppic	0	0.518297	0.52	0.023	0	MG		Maml3	1.45332e-15	-0.543839	0.459	0.553	3.43827e-11
4933406I18Rik	0	0.51718	0.385	0.025	0	MG		Meg3	2.20542e-15	0.416529	0.377	0.223	5.21759e-11
Ier5l	0	0.516011	0.498	0.026	0	MG		Plch2	2.7466e-15	-0.411301	0.289	0.387	6.4979e-11
Scpep1	0	0.515216	0.653	0.111	0	MG		Fnip1	2.97237e-15	-0.394758	0.692	0.704	7.03202e-11
Aldh1l2	0	0.51515	0.53	0.056	0	MG		Mctp1	3.31287e-15	-1.12443	0.189	0.317	7.83758e-11
Trib3	0	0.512317	0.469	0.058	0	MG		Gbf1	3.66539e-15	-0.369579	0.791	0.8	8.67158e-11
B4galt6	0	0.509215	0.574	0.047	0	MG		Xrcc6	4.00576e-15	-0.437927	0.624	0.651	9.47682e-11
Stx4a	0	0.509167	0.712	0.123	0	MG		Plcb1	4.72671e-15	-1.22909	0.296	0.397	1.11825e-10
Rasa3	0	0.508581	0.584	0.067	0	MG		Tspan7	4.87681e-15	-0.395844	0.778	0.771	1.15376e-10
Egr2	0	0.508203	0.451	0.028	0	MG		Taok3	5.99507e-15	-0.474736	0.426	0.492	1.41831e-10
Renbp	0	0.507988	0.567	0.034	0	MG		Ybx3	9.31781e-15	-0.252095	0.963	0.937	2.20441e-10
Ostn	0	0.506872	0.294	0.007	0	MG		Cul3	1.15321e-14	-0.316133	0.929	0.886	2.72826e-10
Lama1	0	0.505531	0.515	0.042	0	MG		Nsf	1.24732e-14	-0.331645	0.826	0.814	2.9509e-10
Hpse	0	0.502916	0.329	0.013	0	MG		Hist1h1c	1.29489e-14	0.270149	0.426	0.255	3.06345e-10
Gas1	0	0.502893	0.438	0.046	0	MG		Rnf157	1.60779e-14	-0.448271	0.477	0.54	3.80371e-10
Kcnmb4	0	0.500606	0.505	0.053	0	MG		Kremen1	2.14384e-14	-0.394532	0.168	0.279	5.0719e-10
Necab3	0	0.497969	0.331	0.012	0	MG		Rnf121	2.26243e-14	-0.530281	0.44	0.501	5.35245e-10
A830019P07Rik	0	0.49342	0.362	0.018	0	MG		Faf1	3.662e-14	-0.334603	0.829	0.827	8.66357e-10
Arpc1b	0	0.492019	0.495	0.038	0	MG		Diras2	3.74085e-14	-0.332651	0.784	0.786	8.85011e-10
Vcam1	0	0.49012	0.294	0.016	0	MG		Svop	4.54159e-14	-0.452544	0.439	0.489	1.07445e-09
Slc6a11	0	0.48807	0.456	0.041	0	MG		Gnat1	4.86521e-14	-0.637478	0.149	0.261	1.15101e-09
Spred2	0	0.487025	0.571	0.065	0	MG		Coro2b	6.03733e-14	-0.383043	0.216	0.322	1.42831e-09
Abhd2	0	0.485883	0.589	0.048	0	MG		Tmsb10	8.40243e-14	0.350878	0.878	0.7	1.98785e-09
Vasp	0	0.483473	0.561	0.048	0	MG		Tbc1d8	9.98397e-14	-0.385557	0.62	0.634	2.36201e-09
Tgif1	0	0.482844	0.502	0.014	0	MG		Ndufb8	1.06654e-13	-0.268132	0.957	0.913	2.52322e-09
Pdgfa	0	0.481591	0.444	0.021	0	MG		Gm12802	1.09803e-13	-0.422798	0.371	0.448	2.59771e-09
Hkdc1	0	0.480209	0.438	0.023	0	MG		Gm20388	1.21208e-13	-0.296198	0.94	0.906	2.86755e-09
Kcnk1	0	0.479969	0.484	0.049	0	MG		Ppa2	1.95994e-13	-0.351627	0.764	0.739	4.63682e-09
Pim1	0	0.479152	0.373	0.026	0	MG		Rrp1b	2.06213e-13	-0.394494	0.626	0.633	4.87859e-09
Ano6	0	0.478767	0.576	0.077	0	MG		Bcl3	3.08532e-13	-0.379639	0.171	0.281	7.29925e-09
Zcchc24	0	0.477656	0.52	0.023	0	MG		Tet3	4.38142e-13	-0.285855	0.826	0.802	1.03656e-08
Sox8	0	0.471431	0.428	0.008	0	MG		Mxra7	5.78183e-13	-0.387583	0.57	0.591	1.36786e-08
Nrarp	0	0.468634	0.439	0.022	0	MG		Hs3st3b1	7.21162e-13	-0.430447	0.545	0.57	1.70613e-08
Pros1	0	0.465775	0.574	0.082	0	MG		Spata1	9.89103e-13	-0.467329	0.349	0.428	2.34002e-08
Emp2	0	0.465309	0.299	0.004	0	MG		Pmepa1	1.44431e-12	-0.399176	0.28	0.367	3.41694e-08
Col18a1	0	0.465104	0.428	0.014	0	MG		Hist1h2bc	1.51621e-12	0.299405	0.638	0.445	3.58704e-08
Myh14	0	0.463281	0.482	0.013	0	MG		Slmap	2.51212e-12	-0.356109	0.638	0.641	5.94316e-08
Itga9	0	0.461121	0.391	0.012	0	MG		Mfge8	2.66365e-12	-0.387391	0.432	0.493	6.30167e-08
Specc1	0	0.459549	0.41	0.04	0	MG		AC146911.1	3.24795e-12	-0.370973	0.209	0.307	7.68401e-08
Amotl1	0	0.459511	0.533	0.026	0	MG		Nktr	3.52739e-12	-0.310891	0.866	0.82	8.34509e-08
Gli3	0	0.457908	0.515	0.024	0	MG		Myo18a	4.41911e-12	-0.372528	0.222	0.318	1.04547e-07
Psat1	0	0.451051	0.587	0.084	0	MG		Sec22c	5.20366e-12	-0.369301	0.249	0.341	1.23108e-07
Lrp1	0	0.450969	0.516	0.051	0	MG		Sec62	6.69282e-12	-0.289567	0.959	0.904	1.58339e-07
Neurog2	0	0.447625	0.311	0.013	0	MG		Slc3a2	7.70872e-12	-0.395914	0.563	0.567	1.82373e-07
Tox2	0	0.447211	0.53	0.062	0	MG		Desi1	7.84364e-12	-0.327513	0.906	0.858	1.85565e-07
Nes	0	0.444833	0.299	0.012	0	MG		Dlg2	7.89891e-12	-0.349898	0.985	0.968	1.86873e-07
Alpk1	0	0.443385	0.347	0.012	0	MG		Etv6	8.89922e-12	-0.401064	0.66	0.651	2.10538e-07
Sema3e	0	0.438963	0.352	0.022	0	MG		Zranb1	1.12713e-11	-0.268345	0.912	0.858	2.66658e-07
Gli2	0	0.437068	0.403	0.011	0	MG		Eif3b	1.18609e-11	-0.506929	0.355	0.416	2.80606e-07
Tns3	0	0.435657	0.497	0.043	0	MG		Kdm7a	1.32078e-11	-0.378785	0.309	0.387	3.12471e-07
Cdc42se1	0	0.435111	0.553	0.054	0	MG		Ncoa1	1.46959e-11	-0.273825	0.948	0.926	3.47676e-07
Tnfrsf1a	0	0.429162	0.515	0.02	0	MG		Lrit1	1.59026e-11	-0.350322	0.568	0.578	3.76224e-07
Lzts2	0	0.428281	0.594	0.086	0	MG		Pip4k2c	1.68667e-11	-0.343932	0.247	0.338	3.99032e-07
Ftl1-ps1	0	0.427415	0.576	0.078	0	MG		Zfp516	2.1782e-11	-0.352091	0.627	0.63	5.15318e-07
Hunk	0	0.427168	0.487	0.059	0	MG		Ier2	2.32645e-11	-0.566313	0.267	0.353	5.50392e-07
Tnfaip6	0	0.426764	0.327	0.018	0	MG		Cep164	2.60353e-11	-0.386764	0.482	0.514	6.15944e-07
Popdc3	0	0.422811	0.373	0.014	0	MG		Polg2	5.62917e-11	-0.31723	0.177	0.273	1.33175e-06
Necap2	0	0.420039	0.604	0.084	0	MG		Usp33	7.04961e-11	-0.374918	0.623	0.603	1.6678e-06
Bcam	0	0.419579	0.312	0.014	0	MG		Gm26827	8.4773e-11	-0.415675	0.339	0.406	2.00556e-06
Nkd1	0	0.418877	0.495	0.034	0	MG		Gm48321	9.09692e-11	-0.387482	0.237	0.324	2.15215e-06
Ubash3b	0	0.418406	0.414	0.045	0	MG		Herc3	9.64528e-11	-0.297618	0.789	0.768	2.28188e-06
Sgpl1	0	0.41757	0.597	0.083	0	MG		Scn8a	9.71932e-11	-0.366726	0.533	0.56	2.2994e-06
Homer2	0	0.416237	0.329	0.019	0	MG		Ttll5	1.02997e-10	-0.396159	0.521	0.545	2.43669e-06
2610035D17Rik	0	0.413055	0.368	0.037	0	MG		C1ql3	1.40531e-10	-0.3838	0.485	0.526	3.32468e-06
Aif1l	0	0.411763	0.411	0.018	0	MG		Lurap1l	1.40645e-10	-0.345136	0.546	0.579	3.32738e-06
Csrp1	0	0.406587	0.398	0.017	0	MG		Wapl	1.89831e-10	-0.304834	0.775	0.736	4.49103e-06
Baz1a	0	0.405567	0.475	0.036	0	MG		Fam161a	1.94004e-10	-0.308169	0.672	0.68	4.58974e-06
Lama5	0	0.403997	0.441	0.013	0	MG		Ccdc6	2.28586e-10	-0.369207	0.325	0.386	5.40788e-06
Arhgef37	0	0.401879	0.355	0.016	0	MG		D630045J12Rik	2.77409e-10	-0.370064	0.275	0.348	6.56294e-06
Relb	0	0.399283	0.406	0.02	0	MG		Bbs7	2.78549e-10	-0.361397	0.328	0.389	6.58991e-06
Scamp3	0	0.399053	0.617	0.079	0	MG		Bhlhe41	2.88943e-10	-0.320373	0.168	0.259	6.83582e-06
Cd151	0	0.398165	0.451	0.016	0	MG		Tcf12	2.96171e-10	-0.278984	0.941	0.917	7.0068e-06
Dtx4	0	0.394512	0.492	0.056	0	MG		Dcun1d3	3.19496e-10	-0.395277	0.333	0.396	7.55864e-06
Phlda3	0	0.391882	0.38	0.024	0	MG		Slc25a12	3.30141e-10	-0.364372	0.517	0.537	7.81047e-06
Gsto1	0	0.391628	0.516	0.059	0	MG		Hs3st5	3.36792e-10	0.288113	0.261	0.156	7.96782e-06
Pard6g	0	0.391231	0.439	0.037	0	MG		Dlg1	4.77675e-10	-0.292068	0.806	0.789	1.13008e-05
Prelp	0	0.390561	0.329	0.017	0	MG		Cfap61	6.34873e-10	-0.357652	0.199	0.29	1.50198e-05
Maff	0	0.388568	0.416	0.044	0	MG		Jam2	6.60124e-10	-0.382738	0.567	0.568	1.56172e-05
Hsd17b11	0	0.388288	0.454	0.011	0	MG		Tnrc6c	6.71584e-10	-0.280931	0.825	0.793	1.58883e-05
Irak1	0	0.386156	0.558	0.079	0	MG		Wdr47	6.86949e-10	-0.375411	0.524	0.533	1.62518e-05
Tspan4	0	0.385636	0.492	0.029	0	MG		Pcdh9	8.36323e-10	0.294927	0.72	0.563	1.97857e-05
Glis3	0	0.384613	0.293	0.013	0	MG		Fryl	1.06525e-09	-0.282602	0.825	0.798	2.52016e-05
Fads3	0	0.384551	0.365	0.014	0	MG		Pde4b	1.11072e-09	-0.633633	0.175	0.262	2.62773e-05
Lypd6	0	0.384531	0.359	0.016	0	MG		Slc25a37	1.40255e-09	-0.329774	0.429	0.471	3.31816e-05
Itga1	0	0.382685	0.263	0.006	0	MG		Nlgn1	1.45115e-09	0.331478	0.595	0.432	3.43314e-05
Ap1s1	0	0.381943	0.597	0.086	0	MG		Ypel3	1.8856e-09	-0.259685	0.753	0.717	4.46095e-05
Dcxr	0	0.376231	0.457	0.018	0	MG		Mreg	1.98872e-09	-0.358197	0.209	0.288	4.70492e-05
Hif3a	0	0.374813	0.441	0.015	0	MG		Eml5	2.06307e-09	-0.252975	0.956	0.926	4.88082e-05
Nln	0	0.374473	0.566	0.076	0	MG		Fbxo9	2.2213e-09	-0.306317	0.673	0.648	5.25514e-05
P2rx4	0	0.373381	0.441	0.027	0	MG		Dock8	2.30623e-09	-0.486854	0.271	0.349	5.45609e-05
Smox	0	0.372655	0.508	0.032	0	MG		Adcy1	2.4494e-09	-0.32555	0.744	0.718	5.79479e-05
1810010H24Rik	0	0.372265	0.383	0.034	0	MG		Fbxl5	2.87774e-09	-0.316268	0.661	0.639	6.80816e-05
Rbms2	0	0.370821	0.487	0.038	0	MG		Ccdc85c	3.02968e-09	-0.35232	0.455	0.475	7.16761e-05
Boc	0	0.369583	0.357	0.006	0	MG		Elp4	3.11725e-09	-0.357086	0.766	0.736	7.3748e-05
Abcg2	0	0.366856	0.398	0.017	0	MG		Klc3	3.12159e-09	-0.256952	0.776	0.745	7.38505e-05
Pck2	0	0.365953	0.416	0.018	0	MG		Lifr	3.16362e-09	-0.342082	0.552	0.567	7.48449e-05
F3	0	0.361019	0.252	0.009	0	MG		Wdr20	4.10467e-09	-0.354212	0.611	0.591	9.71082e-05
Jdp2	0	0.360317	0.426	0.045	0	MG		Patj	5.36101e-09	-0.393259	0.411	0.453	0.000126831
Acot1	0	0.360284	0.314	0.014	0	MG		Myo5b	5.85894e-09	-0.430224	0.321	0.388	0.000138611
Ctdspl	0	0.36005	0.482	0.048	0	MG		Fars2	6.88609e-09	-0.330632	0.669	0.645	0.000162911
Stard5	0	0.357483	0.405	0.02	0	MG		Arl13b	7.14276e-09	-0.388567	0.473	0.486	0.000168983
Adam23	0	0.357253	0.414	0.044	0	MG		Srpk2	7.53872e-09	-0.286289	0.873	0.818	0.000178351
Kcnj10	0	0.355509	0.34	0.013	0	MG		Hook3	7.56146e-09	-0.30439	0.738	0.705	0.000178889
Tspan14	0	0.355047	0.498	0.047	0	MG		Mtcl1	9.30088e-09	-0.33455	0.719	0.677	0.00022004
Plin2	0	0.354685	0.363	0.016	0	MG		Dcc	9.63246e-09	-0.692537	0.34	0.394	0.000227885
Rbpms	0	0.354406	0.322	0.016	0	MG		Ypel2	1.01126e-08	-0.346732	0.722	0.701	0.000239243
Lrrk2	0	0.348336	0.383	0.008	0	MG		Grm7	1.0485e-08	-0.733574	0.323	0.391	0.000248054
Gm26669	0	0.347747	0.368	0.003	0	MG		Prkd1	1.17729e-08	-0.268027	0.931	0.897	0.000278524
Gprc5b	0	0.346922	0.41	0.015	0	MG		Gm14505	1.18621e-08	-0.387326	0.184	0.269	0.000280633
Mdfic	0	0.344813	0.352	0.006	0	MG		Elmod2	1.40555e-08	-0.318245	0.227	0.299	0.000332525
Itpr2	0	0.343293	0.406	0.019	0	MG		Cspg5	1.44403e-08	-0.341079	0.415	0.441	0.000341628
Tubb6	0	0.336494	0.382	0.029	0	MG		Nav1	1.47675e-08	-0.35664	0.62	0.609	0.000349368
Psmb8	0	0.335546	0.299	0.009	0	MG		Gm10353	1.48934e-08	-0.3029	0.215	0.288	0.000352348
Tmbim1	0	0.333878	0.477	0.028	0	MG		Ctnna2	1.68571e-08	-0.537816	0.496	0.529	0.000398805
Aldh2	0	0.33209	0.424	0.033	0	MG		Mok	1.92055e-08	-0.348929	0.312	0.365	0.000454365
Ctso	0	0.331143	0.497	0.05	0	MG		Zfp804b	2.00177e-08	-0.280253	0.732	0.687	0.000473579
Mob3b	0	0.330114	0.314	0.02	0	MG		Fam120a	2.23136e-08	-0.319098	0.517	0.509	0.000527896
Uap1l1	0	0.328168	0.406	0.019	0	MG		Mafg	2.34075e-08	-0.324835	0.228	0.296	0.000553775
Rgs3	0	0.322902	0.393	0.02	0	MG		Gm16062	2.53005e-08	-0.323872	0.314	0.379	0.00059856
Sh3pxd2a	0	0.32276	0.472	0.051	0	MG		Insm1	3.95806e-08	-0.323555	0.508	0.518	0.000936397
Tifa	0	0.322307	0.47	0.049	0	MG		Gdpd5	4.25112e-08	-0.301615	0.689	0.651	0.00100573
A730017C20Rik	0	0.316184	0.405	0.043	0	MG		Max	4.62306e-08	-0.3029	0.457	0.47	0.00109372
Sphk1	0	0.314042	0.362	0.009	0	MG		Dyrk2	5.32856e-08	-0.273109	0.691	0.671	0.00126063
Fam129b	0	0.314027	0.357	0.014	0	MG		Eif2ak3	5.61693e-08	-0.370783	0.281	0.342	0.00132885
Plekho2	0	0.313575	0.39	0.011	0	MG		Nxnl2	5.82524e-08	-0.34012	0.613	0.599	0.00137814
S100a13	0	0.313508	0.339	0.017	0	MG		Dnajc1	6.09632e-08	-0.345859	0.722	0.708	0.00144227
Acot2	0	0.313041	0.395	0.023	0	MG		Tiparp	6.99329e-08	-0.407663	0.576	0.566	0.00165447
Prr5l	0	0.31255	0.253	0.007	0	MG		Gm37459	7.17404e-08	-0.378213	0.308	0.359	0.00169723
Gpc4	0	0.312355	0.331	0.012	0	MG		Dusp26	7.92762e-08	-0.301586	0.212	0.284	0.00187552
Hebp1	0	0.312276	0.383	0.015	0	MG		Zfp445	9.20387e-08	-0.289682	0.716	0.663	0.00217745
Triobp	0	0.312237	0.416	0.043	0	MG		R3hcc1l	9.61146e-08	-0.333375	0.723	0.681	0.00227388
Abracl	0	0.310479	0.441	0.044	0	MG		Wdpcp	9.933e-08	-0.435057	0.433	0.469	0.00234995
Grk3	0	0.308668	0.363	0.03	0	MG		Tmem243	1.02268e-07	-0.279847	0.703	0.662	0.00241945
Gm26532	0	0.307692	0.289	0.017	0	MG		Lsm2	1.07443e-07	-0.335781	0.321	0.369	0.00254188
Pls3	0	0.307457	0.383	0.032	0	MG		Lbhd1	1.4457e-07	-0.305552	0.389	0.419	0.00342024
Id4	0	0.307017	0.288	0.02	0	MG		Slc2a1	1.45005e-07	-0.317352	0.331	0.382	0.00343053
Adhfe1	0	0.306798	0.39	0.013	0	MG		Cerk	1.47317e-07	-0.357821	0.474	0.481	0.00348523
Lamb2	0	0.306723	0.359	0.009	0	MG		Plekha6	1.86912e-07	-0.315749	0.377	0.412	0.00442196
S1pr1	0	0.306061	0.317	0.006	0	MG		Dync1h1	1.9855e-07	-0.273279	0.672	0.641	0.00469729
Carhsp1	0	0.305516	0.401	0.023	0	MG		Ppef2	2.14399e-07	-0.332359	0.334	0.376	0.00507225
Notch2	0	0.304339	0.405	0.022	0	MG		Dennd6a	2.33266e-07	-0.341233	0.455	0.471	0.0055186
Fam129a	0	0.304072	0.276	0.005	0	MG		Rhbdl3	2.44507e-07	-0.355837	0.23	0.292	0.00578456
Spry4	0	0.303213	0.367	0.015	0	MG		Gls	2.5508e-07	-0.299246	0.809	0.771	0.00603467
Slc12a4	0	0.302842	0.382	0.011	0	MG		1110051M20Rik	2.61752e-07	-0.276933	0.916	0.864	0.00619253
Rab13	0	0.300601	0.411	0.027	0	MG		Snd1	2.86913e-07	-0.336141	0.63	0.591	0.00678779
Plscr1	0	0.298334	0.337	0.01	0	MG		Scarb1	2.90776e-07	-0.315473	0.342	0.38	0.00687918
Ednrb	0	0.297779	0.336	0.011	0	MG		Raly	2.98294e-07	-0.261365	0.691	0.641	0.00705705
Mpst	0	0.297065	0.428	0.04	0	MG		Fsd1l	3.56145e-07	-0.355207	0.527	0.501	0.00842569
Slc39a1	0	0.296557	0.451	0.047	0	MG		Atp11b	3.728e-07	-0.288188	0.67	0.638	0.00881971
Cyp2d22	0	0.295701	0.355	0.008	0	MG		Trak2	3.81674e-07	-0.274906	0.688	0.661	0.00902964
Smo	0	0.295596	0.4	0.028	0	MG		Ccnl1	4.42056e-07	-0.282406	0.66	0.622	0.0104582
Ttc23	0	0.293398	0.382	0.026	0	MG		Map7	4.58028e-07	-0.26563	0.867	0.837	0.010836
Ppp1r16b	0	0.291751	0.377	0.022	0	MG		Ap1b1	5.01074e-07	-0.256166	0.736	0.699	0.0118544
Gsap	0	0.284723	0.327	0.019	0	MG		Pkd1	5.20741e-07	-0.323534	0.43	0.447	0.0123197
Rnaset2a	0	0.284001	0.451	0.046	0	MG		Yif1b	5.61093e-07	-0.29602	0.514	0.498	0.0132743
Capn2	0	0.283319	0.421	0.031	0	MG		Dock9	6.10166e-07	-0.328358	0.259	0.313	0.0144353
Slc9a3r1	0	0.282983	0.368	0.015	0	MG		Wdr59	6.33428e-07	-0.319446	0.317	0.363	0.0149856
1700003F12Rik	0	0.279682	0.26	0.007	0	MG		Ppm1b	6.69533e-07	-0.262171	0.791	0.728	0.0158398
Uaca	0	0.278948	0.368	0.033	0	MG		Ctnna1	7.11252e-07	-0.336865	0.471	0.476	0.0168268
Gch1	0	0.278815	0.265	0.01	0	MG		Cds1	7.34352e-07	-0.319731	0.39	0.422	0.0173733
Stc2	0	0.274045	0.322	0.01	0	MG		Rnf144b	8.54234e-07	-0.343353	0.437	0.462	0.0202095
Tcf7l1	0	0.267979	0.288	0.011	0	MG		Sh3bgrl2	9.26049e-07	-0.32505	0.409	0.429	0.0219085
Pnpla2	0	0.267165	0.405	0.037	0	MG		Kdsr	1.02006e-06	-0.29814	0.272	0.323	0.0241326
Ets1	0	0.266907	0.273	0.009	0	MG		Fbxo34	1.29883e-06	-0.31696	0.283	0.328	0.0307278
Pycr1	0	0.263872	0.342	0.031	0	MG		Lhfpl3	1.38328e-06	-0.507939	0.624	0.631	0.0327256
Eva1c	0	0.263146	0.289	0.008	0	MG		Pbx3	1.49364e-06	-0.270307	0.814	0.828	0.0353365
Mgmt	0	0.263045	0.253	0.005	0	MG		Emc7	1.67458e-06	-0.256759	0.829	0.775	0.0396171
Vwa5a	0	0.262178	0.367	0.013	0	MG		C2cd2l	1.6765e-06	-0.269373	0.617	0.588	0.0396626
Clrn1	0	0.259413	0.25	0.007	0	MG		Lactbl1	2.18326e-06	-0.290787	0.327	0.375	0.0516515
Gng7	0	0.253145	0.342	0.025	0	MG		Ankrd28	2.91606e-06	-0.344657	0.592	0.562	0.0689881
Rhod	0	0.252931	0.299	0.007	0	MG		Lrrc1	3.06302e-06	-0.305141	0.499	0.501	0.0724649
Napepld	0	0.251127	0.337	0.028	0	MG		1110034G24Rik	3.94075e-06	-0.276536	0.239	0.292	0.0932302
Rilpl1	7.75102e-308	0.331402	0.48	0.061	1.83374e-303	MG		Ier3	4.43506e-06	-0.324078	0.417	0.435	0.104925
Actb	8.63068e-308	1.76454	0.998	0.948	2.04185e-303	MG		Slc2a13	4.52601e-06	-0.541248	0.317	0.357	0.107076
Gng5	1.92099e-307	1.97571	0.982	0.641	4.54468e-303	MG		Hlf	4.64758e-06	-0.280881	0.196	0.257	0.109952
Eef1d	6.82015e-307	1.03523	0.939	0.296	1.61351e-302	MG		Caprin2	4.74233e-06	-0.394797	0.362	0.406	0.112194
Plod2	7.54947e-306	0.356516	0.459	0.056	1.78605e-301	MG		Gm26518	5.11193e-06	-0.286314	0.652	0.607	0.120938
Tspan15	2.85688e-305	0.741231	0.719	0.143	6.75881e-301	MG		Gorasp2	5.19306e-06	-0.263428	0.579	0.55	0.122858
Gm3764	3.66706e-305	0.405613	0.314	0.027	8.67552e-301	MG		Slc38a2	6.25766e-06	-0.305849	0.68	0.638	0.148044
Bcl2	6.72648e-305	0.376734	0.429	0.05	1.59135e-300	MG		Nme5	7.5375e-06	-0.322105	0.275	0.314	0.178322
Ifnar2	7.50062e-305	0.317078	0.525	0.072	1.7745e-300	MG		Fos	7.64909e-06	-0.678419	0.504	0.504	0.180962
Tmeff1	2.03035e-304	0.574892	0.607	0.1	4.80341e-300	MG		Kif3b	7.98066e-06	-0.292313	0.411	0.424	0.188806
Ostf1	8.80102e-303	0.413931	0.559	0.082	2.08215e-298	MG		AW549877	8.22758e-06	-0.295253	0.449	0.446	0.194648
Zfp467	5.67924e-302	0.38503	0.577	0.087	1.3436e-297	MG		Ttyh2	8.70557e-06	-0.266967	0.614	0.59	0.205956
Slc7a3	1.6054e-301	0.286725	0.336	0.03	3.79804e-297	MG		Kansl1l	8.9184e-06	-0.268663	0.816	0.778	0.210991
Eef1b2	6.82475e-301	1.78057	0.99	0.745	1.6146e-296	MG		Lmbrd1	1.02406e-05	-0.258457	0.641	0.594	0.242273
Clip3	9.63887e-299	0.847558	0.836	0.198	2.28036e-294	MG		Pde6a	1.13822e-05	-0.308314	0.566	0.554	0.269279
Pappa	8.31964e-298	0.392446	0.278	0.021	1.96826e-293	MG		Fam169a	1.15035e-05	-0.274498	0.704	0.655	0.272151
Ctsl	2.87271e-296	2.08203	0.985	0.728	6.79625e-292	MG		Asxl2	1.28637e-05	-0.256722	0.722	0.671	0.304329
Eef1a1	2.89105e-296	1.44622	1	0.988	6.83964e-292	MG		Rasgef1b	1.3035e-05	-0.447882	0.343	0.374	0.308382
Sri	5.89791e-296	0.770882	0.87	0.214	1.39533e-291	MG		Tmem230	1.36396e-05	-0.255952	0.504	0.493	0.322685
Fam19a5	2.97255e-295	0.980918	0.887	0.233	7.03245e-291	MG		Dlc1	1.39317e-05	-0.25243	0.747	0.685	0.329596
Tbx2	3.0459e-295	0.484545	0.592	0.095	7.20599e-291	MG		Stat3	1.62914e-05	-0.324947	0.804	0.728	0.385422
Dach2	3.82172e-295	0.877252	0.464	0.062	9.04142e-291	MG		Acvr2b	1.77214e-05	-0.289014	0.3	0.328	0.419253
Nme2	4.00545e-295	0.334465	0.51	0.07	9.47608e-291	MG		Ppard	1.85945e-05	-0.323145	0.374	0.391	0.439908
Nav2	1.09121e-294	1.75652	0.98	0.385	2.58159e-290	MG		Stk39	2.14663e-05	-0.331975	0.446	0.447	0.50785
Rhoq	1.65456e-293	0.559693	0.743	0.148	3.91436e-289	MG		Mdm1	2.20794e-05	-0.27486	0.574	0.539	0.522355
Pde5a	5.11996e-293	0.319722	0.401	0.045	1.21128e-288	MG		Grk1	2.27599e-05	-0.262555	0.63	0.582	0.538453
Nedd9	6.74153e-293	0.396644	0.442	0.055	1.59491e-288	MG		Fbxo36	2.98737e-05	-0.318837	0.271	0.308	0.706751
Rab34	9.85211e-293	0.301618	0.479	0.062	2.33081e-288	MG		Rasal2	3.44493e-05	-0.338598	0.862	0.812	0.815001
Arf6	1.04487e-292	0.674389	0.831	0.189	2.47196e-288	MG		Prdm1	3.62525e-05	-0.368612	0.267	0.309	0.857662
Ets2	4.07374e-291	0.340923	0.398	0.045	9.63766e-287	MG		Kcnip4	3.77011e-05	-0.287834	0.524	0.512	0.891932
Prdx6	1.23002e-290	1.56536	0.911	0.274	2.90998e-286	MG		Gm14211	4.83074e-05	-0.283391	0.228	0.271	1
2900026A02Rik	2.08166e-290	0.625691	0.704	0.136	4.92478e-286	MG		Usp9x	5.11995e-05	-0.262711	0.789	0.711	1
Lasp1	6.61067e-289	0.343266	0.549	0.082	1.56395e-284	MG		Nedd4l	5.25087e-05	-0.303284	0.23	0.276	1
Cdk6	3.56164e-288	0.537281	0.618	0.105	8.42612e-284	MG		Dpf3	5.4611e-05	-0.399892	0.414	0.422	1
Glul	8.45939e-288	1.31749	0.84	0.225	2.00132e-283	MG		C530008M17Rik	5.60467e-05	-0.356635	0.619	0.597	1
Cspg5	1.34216e-287	1.9838	0.928	0.425	3.17529e-283	MG		Pias3	5.66419e-05	-0.263962	0.33	0.353	1
Chac1	1.47138e-286	0.368454	0.39	0.044	3.481e-282	MG		Hspa5	6.87747e-05	-0.276784	0.782	0.708	1
Rpl12	2.22078e-286	1.9157	0.997	0.865	5.25393e-282	MG		Cdc14a	7.40398e-05	-0.328927	0.345	0.369	1
Actg1	1.53691e-285	1.92659	0.997	0.932	3.63602e-281	MG		Pcf11	7.49045e-05	-0.260081	0.552	0.516	1
Src	3.47232e-285	0.275414	0.436	0.054	8.21481e-281	MG		Fuom	7.89524e-05	-0.264055	0.242	0.282	1
Rpl10	1.05551e-284	1.5901	0.993	0.821	2.49713e-280	MG		Itsn2	7.91993e-05	-0.280788	0.636	0.594	1
Cdh6	2.40234e-284	0.52773	0.426	0.053	5.68346e-280	MG		2010111I01Rik	7.95404e-05	-0.323877	0.446	0.447	1
Ptn	2.74456e-283	1.82079	0.579	0.106	6.49307e-279	MG		Sipa1l3	8.35772e-05	-0.289331	0.314	0.339	1
Cdh11	5.26518e-283	0.514016	0.681	0.126	1.24564e-278	MG		Golim4	8.58939e-05	-0.313355	0.567	0.529	1
Ifitm3	1.03519e-282	1.09131	0.28	0.023	2.44906e-278	MG		Uckl1	9.2061e-05	-0.260696	0.43	0.431	1
Slc6a1	2.34572e-281	0.345824	0.461	0.061	5.5495e-277	MG		Dalrd3	0.000108423	-0.271641	0.592	0.546	1
Rps10	1.47564e-280	1.30339	0.998	0.969	3.49106e-276	MG		Ift88	0.000118224	-0.300709	0.28	0.311	1
Spry1	2.88135e-280	0.265781	0.257	0.019	6.81669e-276	MG		Smim8	0.000130636	-0.2768	0.426	0.418	1
Rps26	8.72568e-280	1.35409	1	0.962	2.06432e-275	MG		Sik2	0.000132181	-0.44678	0.423	0.419	1
Rpl39	3.28364e-278	1.38373	1	0.988	7.76844e-274	MG		Akap1	0.000160774	-0.25422	0.33	0.346	1
Rps20	3.58551e-278	1.61435	1	0.984	8.4826e-274	MG		Wwc2	0.000164922	-0.256934	0.586	0.553	1
1700066M21Rik	1.28358e-276	0.257989	0.337	0.034	3.03668e-272	MG		Fam69a	0.000177519	-0.313746	0.383	0.395	1
Plat	2.60523e-276	0.373375	0.271	0.022	6.16346e-272	MG		Far1	0.00018988	-0.264024	0.446	0.442	1
Itgb1	1.23661e-275	1.2424	0.957	0.381	2.92557e-271	MG		Taf1	0.000213237	-0.267165	0.641	0.593	1
Abhd4	9.29797e-275	0.288114	0.5	0.071	2.19971e-270	MG		Gm47283	0.000219143	-0.253004	0.778	0.704	1
Ier5	3.78536e-273	0.393952	0.618	0.108	8.95541e-269	MG		Naa35	0.000229985	-0.260895	0.661	0.624	1
Rpl35a	6.06056e-273	1.37044	0.995	0.978	1.43381e-268	MG		Rasa2	0.000245569	-0.334128	0.409	0.406	1
Rab31	5.64265e-272	0.334744	0.472	0.066	1.33494e-267	MG		Zfp266	0.000262753	-0.286741	0.493	0.468	1
Atic	5.79877e-272	0.262107	0.444	0.058	1.37187e-267	MG		Socs5	0.000269659	-0.252866	0.27	0.298	1
Cd63	1.28484e-271	1.89378	0.985	0.646	3.03968e-267	MG		Rbfox1	0.000433926	-0.532784	0.275	0.304	1
Nlgn1	1.4395e-271	2.22414	0.987	0.59	3.40557e-267	MG		Chga	0.000507112	-0.311036	0.446	0.444	1
Nr2f6	1.64926e-271	0.452858	0.533	0.084	3.90182e-267	MG		Cep126	0.00054956	-0.30162	0.508	0.476	1
Serp1	1.81986e-271	0.772315	0.817	0.203	4.30543e-267	MG		Podxl	0.000561477	-0.253699	0.554	0.52	1
Mt1	7.05265e-271	3.74089	0.984	0.747	1.66852e-266	MG		Dennd4a	0.000619692	-0.271875	0.549	0.523	1
Rplp1	1.55356e-270	1.48217	0.997	0.97	3.67542e-266	MG		Tom1l2	0.000660188	-0.250386	0.574	0.537	1
Nebl	8.67363e-269	0.53917	0.617	0.11	2.05201e-264	MG		Eepd1	0.00068726	-0.27049	0.311	0.329	1
Fam13c	2.23587e-268	0.403067	0.421	0.055	5.28963e-264	MG		Akap6	0.000730907	-0.250976	0.85	0.784	1
Map3k20	8.01151e-268	0.422967	0.52	0.081	1.89536e-263	MG		Gns	0.000743193	-0.253168	0.371	0.369	1
Timp3	4.91761e-267	1.01368	0.49	0.077	1.16341e-262	MG		Cnnm2	0.000973882	-0.260906	0.405	0.399	1
Slco3a1	8.63326e-267	0.407017	0.497	0.074	2.04246e-262	MG		Ipo5	0.00102029	-0.288839	0.342	0.349	1
C130071C03Rik	9.62796e-267	1.14602	0.924	0.299	2.27778e-262	MG		Smyd3	0.00103515	-0.289915	0.504	0.5	1
Rps19	3.13312e-266	1.49561	0.998	0.859	7.41233e-262	MG		Cfap54	0.00108117	-0.29564	0.336	0.345	1
Lap3	6.33152e-266	0.371055	0.625	0.11	1.49791e-261	MG		Rab30	0.00124589	-0.271382	0.461	0.453	1
Dclk2	3.83355e-265	0.394163	0.546	0.088	9.06942e-261	MG		Ccdc173	0.00125851	-0.257592	0.272	0.293	1
Magt1	1.80638e-264	0.491553	0.623	0.115	4.27353e-260	MG		Jun	0.00128786	-0.307759	0.623	0.584	1
Bst2	2.11448e-264	0.630397	0.53	0.086	5.00244e-260	MG		Rps6ka2	0.00137841	-0.256395	0.571	0.541	1
Rps4x	2.40205e-264	1.3969	0.998	0.961	5.68277e-260	MG		Dis3l2	0.00196179	-0.252237	0.676	0.62	1
Serping1	3.20261e-264	0.633748	0.262	0.022	7.57674e-260	MG		Myo1d	0.00202453	-0.299731	0.296	0.313	1
Pnrc2	3.58052e-264	0.966965	0.806	0.206	8.47079e-260	MG		Gm20275	0.00216508	-0.295095	0.442	0.421	1
Rpl35	5.08584e-264	1.25591	0.997	0.924	1.20321e-259	MG		Arhgap26	0.002661	-0.26457	0.364	0.369	1
2025-09-11	3.29667e-262	0.609968	0.747	0.165	7.79926e-258	MG		Lims1	0.0059871	-0.298252	0.541	0.496	1
Rps28	2.61302e-261	1.30261	0.998	0.994	6.18188e-257	MG		Nr3c2	0.00609302	-0.31765	0.377	0.385	1
Chsy3	5.02487e-261	0.612827	0.354	0.04	1.18878e-256	MG		Tshz2	0.00612233	-0.276209	0.244	0.273	1
Rps16	1.58805e-260	1.18241	0.998	0.97	3.75701e-256	MG		Snta1	0.0079752	-0.266861	0.364	0.356	1
Grid2	2.01632e-260	1.72844	0.839	0.26	4.7702e-256	MG		Srgap3	0.0225253	-0.263953	0.361	0.345	1
Aga	3.61665e-260	0.254183	0.414	0.053	8.55626e-256	MG		Susd6	0.0376396	-0.252988	0.53	0.47	1
Josd2	4.16877e-260	0.630321	0.725	0.161	9.86248e-256	MG		Ryr2	0.0421258	-0.250238	0.271	0.279	1
Rpl13	7.92378e-260	1.09794	0.997	0.989	1.87461e-255	MG		Ispd	0.0503186	-0.262143	0.386	0.368	1
Myl12a	1.28419e-259	1.04849	0.954	0.365	3.03814e-255	MG		Spidr	0.165602	-0.255032	0.259	0.255	1
Pip5k1b	2.58586e-259	0.939612	0.827	0.225	6.11763e-255	MG		Selenop	0.310088	-0.331146	0.657	0.572	1
Sh3rf3	2.02626e-258	0.497207	0.413	0.055	4.79372e-254	MG		Zc3h12b	0.774109	-0.284168	0.37	0.334	1
Robo2	1.82697e-257	1.62466	0.946	0.348	4.32225e-253	MG
Laptm4a	8.12168e-257	1.21319	0.979	0.542	1.92143e-252	MG
Sorcs2	1.78691e-256	0.490744	0.6	0.108	4.22747e-252	MG
Fscn1	2.02506e-256	0.503162	0.539	0.091	4.79088e-252	MG
Sox11	2.13346e-255	0.665866	0.638	0.126	5.04735e-251	MG
Mif	3.13971e-255	1.60834	0.995	0.816	7.42794e-251	MG
Flrt2	1.21855e-254	0.353874	0.304	0.03	2.88285e-250	MG
Rpl36a	8.05375e-254	1.37529	0.997	0.886	1.90536e-249	MG
Rsu1	1.12321e-253	0.385441	0.618	0.114	2.65729e-249	MG
Gpnmb	9.15364e-253	1.18691	0.34	0.039	2.16557e-248	MG
Sqstm1	3.66324e-252	1.33172	0.954	0.395	8.66648e-248	MG
Abca1	3.91318e-252	1.55493	0.929	0.384	9.2578e-248	MG
Gna13	1.71622e-251	0.615645	0.811	0.198	4.06022e-247	MG
Apoe	5.38685e-251	3.35428	0.993	0.842	1.27442e-246	MG
Rps8	3.30404e-250	1.15696	1	0.993	7.81671e-246	MG
Neat1	8.57417e-250	1.07855	0.612	0.131	2.02848e-245	MG
Rpsa	1.13506e-249	1.27622	0.998	0.957	2.68532e-245	MG
Rps29	1.50868e-249	1.00798	1	0.997	3.56924e-245	MG
Rpl28	2.46574e-249	1.16004	1	0.976	5.83346e-245	MG
Rpl17	2.83033e-248	1.26978	0.997	0.928	6.696e-244	MG
Rpl38	2.27561e-247	1.02488	0.998	0.994	5.38364e-243	MG
Hdac7	2.38577e-247	0.33186	0.41	0.055	5.64425e-243	MG
Rps27	3.50484e-247	1.24711	0.998	0.978	8.29176e-243	MG
Rps5	6.29202e-247	1.32235	0.995	0.942	1.48857e-242	MG
Pbxip1	1.50065e-245	0.414592	0.666	0.131	3.55025e-241	MG
Tenm4	1.79475e-245	1.5057	0.701	0.185	4.24601e-241	MG
Marcksl1	2.99343e-245	0.672964	0.78	0.184	7.08185e-241	MG
Setd7	2.73535e-244	0.34816	0.533	0.09	6.4713e-240	MG
Hspe1	4.29957e-244	1.46415	0.998	0.733	1.01719e-239	MG
Rpl18	4.99695e-244	1.02403	0.998	0.964	1.18218e-239	MG
Gpc6	8.07838e-243	1.19823	0.75	0.197	1.91118e-238	MG
Scrn1	2.09106e-242	0.384047	0.59	0.107	4.94704e-238	MG
Nrcam	4.45473e-242	0.79118	0.77	0.187	1.0539e-237	MG
Abcb4	1.19363e-241	0.30899	0.299	0.031	2.82389e-237	MG
Col4a2	1.39128e-241	0.316796	0.299	0.031	3.2915e-237	MG
Rpl37	1.50445e-241	1.12696	1	0.992	3.55923e-237	MG
Ctdsp2	1.69776e-241	0.41794	0.671	0.137	4.01655e-237	MG
Ugp2	2.68012e-241	0.636338	0.804	0.205	6.34062e-237	MG
Cyp20a1	1.94959e-240	0.464105	0.678	0.142	4.61234e-236	MG
Rps27a	2.77669e-240	1.06371	1	0.988	6.5691e-236	MG
Phyh	4.36378e-240	0.367756	0.645	0.125	1.03238e-235	MG
Zhx2	5.89611e-240	0.41605	0.536	0.094	1.3949e-235	MG
Rpl36	3.76566e-239	0.920325	1	0.989	8.90879e-235	MG
Crim1	1.92856e-238	0.780245	0.77	0.188	4.56258e-234	MG
Slc7a1	4.31738e-238	0.539307	0.66	0.14	1.02141e-233	MG
Optn	1.45841e-237	0.560666	0.664	0.142	3.4503e-233	MG
Myo1b	1.70322e-237	0.273653	0.311	0.033	4.02948e-233	MG
Gpr137b	1.75197e-237	0.304656	0.431	0.062	4.1448e-233	MG
Rpl32	3.63652e-237	1.2749	0.998	0.973	8.60327e-233	MG
Rpl27a	3.83044e-237	1.08662	0.998	0.981	9.06206e-233	MG
Gbe1	1.15624e-236	1.10283	0.903	0.31	2.73543e-232	MG
Vgll4	2.96731e-236	0.452084	0.648	0.132	7.02007e-232	MG
Rcc2	5.23522e-236	0.635695	0.75	0.184	1.23855e-231	MG
Rps3a1	5.65149e-236	1.13182	0.998	0.965	1.33703e-231	MG
Rpl7	2.67055e-235	1.08679	0.995	0.944	6.318e-231	MG
Gm1673	2.92948e-235	0.662805	0.826	0.208	6.93056e-231	MG
Rpl23a	5.51028e-235	1.16665	0.997	0.934	1.30362e-230	MG
Lrrc4b	1.14128e-234	0.263134	0.396	0.054	2.70005e-230	MG
Aff3	1.24433e-233	0.930094	0.704	0.171	2.94383e-229	MG
Rps15a	1.75049e-233	1.10651	0.997	0.976	4.14131e-229	MG
Npl	5.96362e-233	0.383298	0.492	0.081	1.41087e-228	MG
Rpl31	1.70767e-232	1.06197	0.998	0.88	4.04e-228	MG
Adamtsl1	2.40034e-232	1.81691	0.541	0.111	5.67872e-228	MG
Six3	2.99346e-232	1.14175	0.956	0.427	7.08193e-228	MG
2310022B05Rik	3.62449e-232	0.259068	0.439	0.065	8.57481e-228	MG
Phlda1	1.75385e-230	0.704935	0.431	0.067	4.14926e-226	MG
Cers2	6.85145e-230	0.266325	0.474	0.075	1.62092e-225	MG
Acsl3	7.04281e-229	1.84788	0.965	0.539	1.66619e-224	MG
Gaa	2.07873e-228	0.296422	0.512	0.087	4.91786e-224	MG
Scd2	2.57502e-228	1.07152	0.946	0.365	6.09198e-224	MG
Cttnbp2nl	1.96227e-227	0.422895	0.562	0.107	4.64234e-223	MG
Ptpn9	1.89157e-225	0.367779	0.688	0.146	4.47507e-221	MG
Tle1	4.85848e-225	0.434378	0.635	0.13	1.14942e-220	MG
Cfl1	1.28993e-224	1.11292	0.995	0.78	3.05172e-220	MG
Dnajb9	3.04743e-224	0.555554	0.689	0.158	7.2096e-220	MG
Sdcbp	1.73909e-222	0.586131	0.832	0.221	4.11434e-218	MG
Endod1	2.66207e-222	0.34838	0.454	0.073	6.29793e-218	MG
Coro1c	3.17144e-222	0.546978	0.715	0.17	7.50299e-218	MG
Prdm5	9.54223e-222	0.336716	0.457	0.074	2.2575e-217	MG
Foxn2	1.09809e-221	0.406255	0.571	0.111	2.59787e-217	MG
Egr3	1.50125e-221	0.757674	0.464	0.081	3.55165e-217	MG
Pak3	2.26225e-221	1.5459	0.845	0.3	5.35202e-217	MG
Shisa9	3.20973e-220	0.455927	0.344	0.044	7.59359e-216	MG
Emd	5.19846e-220	0.56726	0.757	0.191	1.22985e-215	MG
Nfkbiz	1.62309e-219	0.697714	0.544	0.109	3.83991e-215	MG
Rps2	3.42841e-219	1.07389	0.995	0.85	8.11093e-215	MG
Aen	3.92739e-219	0.288388	0.49	0.083	9.29142e-215	MG
Fam118a	1.25304e-218	0.255104	0.368	0.05	2.96445e-214	MG
Dapl1	2.21141e-218	0.941616	0.273	0.029	5.23176e-214	MG
Elf1	2.76731e-218	0.476109	0.638	0.138	6.54689e-214	MG
Utrn	2.97608e-218	0.304853	0.363	0.049	7.0408e-214	MG
Dgkz	5.82599e-218	0.353399	0.576	0.113	1.37831e-213	MG
Rps13	1.09041e-217	0.970564	0.998	0.964	2.57969e-213	MG
Mfge8	3.5957e-217	2.25559	0.914	0.417	8.5067e-213	MG
Lonrf2	3.67985e-217	0.312721	0.502	0.088	8.70578e-213	MG
Pfn1	9.37225e-217	1.13765	0.982	0.69	2.21729e-212	MG
Hsd17b10	1.12702e-216	0.422642	0.712	0.164	2.66631e-212	MG
Rplp2	1.23066e-216	0.906675	0.998	0.975	2.9115e-212	MG
Rnft1	1.50364e-216	0.374278	0.6	0.121	3.55731e-212	MG
Rpl34	1.98028e-216	0.92709	0.997	0.983	4.68494e-212	MG
Dbi	2.47864e-216	2.95675	0.972	0.691	5.86398e-212	MG
Tanc2	1.13216e-215	0.619397	0.752	0.187	2.67846e-211	MG
Cnn3	1.42719e-215	0.827683	0.855	0.272	3.37645e-211	MG
Slc27a1	2.47806e-215	0.429113	0.65	0.142	5.86261e-211	MG
Fam189a2	2.6918e-215	0.360652	0.538	0.1	6.36826e-211	MG
Adk	1.014e-214	0.56316	0.758	0.188	2.39893e-210	MG
Ptprm	4.1248e-214	0.605571	0.638	0.143	9.75845e-210	MG
Samd4	1.46197e-213	1.01583	0.762	0.214	3.45873e-209	MG
Myh9	3.09471e-213	0.701888	0.683	0.168	7.32148e-209	MG
Hip1	3.85254e-213	0.968437	0.832	0.26	9.11434e-209	MG
Rps9	4.1913e-213	0.935386	1	0.961	9.91578e-209	MG
Ldb2	1.7411e-212	0.498588	0.586	0.121	4.11909e-208	MG
Fjx1	1.63201e-211	0.347608	0.312	0.038	3.86101e-207	MG
Csrp2	1.95534e-211	0.371677	0.469	0.081	4.62595e-207	MG
Prdx4	4.58423e-211	0.463318	0.668	0.152	1.08454e-206	MG
Rpl18a	1.03596e-210	1.06929	0.998	0.971	2.45087e-206	MG
Brinp2	1.12703e-210	0.510445	0.447	0.076	2.66632e-206	MG
Ski	4.40809e-210	0.336513	0.574	0.114	1.04287e-205	MG
Lamp1	6.01842e-209	1.0233	0.984	0.604	1.42384e-204	MG
Gadd45b1	3.84377e-208	1.50187	0.842	0.32	9.0936e-204	MG
Mfsd1	2.93742e-207	0.278115	0.488	0.086	6.94934e-203	MG
Sdk2	6.77118e-207	0.253046	0.446	0.072	1.60193e-202	MG
Utp14b	7.22668e-206	0.458488	0.553	0.112	1.70969e-201	MG
Cd81	3.20451e-205	1.18569	0.985	0.623	7.58124e-201	MG
Cyr61	7.47024e-205	1.43676	0.53	0.116	1.76731e-200	MG
Mapre1	4.92049e-203	0.844072	0.942	0.354	1.16409e-198	MG
Cxadr	1.30397e-202	0.502246	0.717	0.179	3.08492e-198	MG
Lrmda	3.56841e-202	0.74883	0.48	0.091	8.44213e-198	MG
Cdk4	5.05387e-202	0.675885	0.863	0.278	1.19564e-197	MG
Ocel1	4.61649e-200	0.28837	0.536	0.104	1.09217e-195	MG
Rpl22l1	7.10336e-200	1.28039	0.979	0.726	1.68051e-195	MG
Fnbp1l	1.23131e-199	0.457167	0.666	0.156	2.91303e-195	MG
Rpl19	1.9398e-199	0.860811	0.998	0.985	4.58918e-195	MG
Rps27l	3.63526e-199	1.09908	0.984	0.612	8.6003e-195	MG
Fau	4.39665e-198	0.852902	0.997	0.988	1.04016e-193	MG
Cacna1d	4.79415e-198	0.751786	0.768	0.211	1.1342e-193	MG
Rack1	1.44099e-197	1.05459	0.992	0.89	3.40909e-193	MG
Rgs2	2.23118e-197	0.725849	0.516	0.109	5.27852e-193	MG
Sel1l3	5.97236e-197	0.439332	0.447	0.079	1.41294e-192	MG
Enho	6.07771e-197	0.349251	0.521	0.101	1.43786e-192	MG
Rpl15	6.38951e-197	0.832188	1	0.969	1.51163e-192	MG
Irf2bpl	6.95872e-197	0.768714	0.885	0.3	1.64629e-192	MG
Epha5	6.96152e-197	1.37525	0.975	0.604	1.64696e-192	MG
Spg21	8.77385e-197	0.4799	0.791	0.214	2.07572e-192	MG
Peak1	1.22543e-196	0.340923	0.47	0.085	2.89912e-192	MG
Gstm5	2.69618e-196	0.72673	0.883	0.292	6.37863e-192	MG
Rps11	5.48927e-195	0.951617	0.997	0.972	1.29865e-190	MG
Rras2	8.44321e-195	0.306835	0.35	0.051	1.99749e-190	MG
Vcl	1.87793e-193	1.67995	0.865	0.334	4.44281e-189	MG
Ephb2	4.18218e-193	0.413416	0.558	0.119	9.8942e-189	MG
Flot1	4.22111e-193	0.603936	0.781	0.225	9.9863e-189	MG
Rpl37a	6.92179e-193	0.78908	0.998	0.988	1.63756e-188	MG
Wdr1	7.11311e-193	0.554151	0.801	0.229	1.68282e-188	MG
Zmiz1	2.58769e-192	0.496743	0.803	0.216	6.12196e-188	MG
Mitf	2.792e-192	0.382073	0.548	0.113	6.60532e-188	MG
Cers6	1.14175e-191	0.554745	0.651	0.156	2.70114e-187	MG
Ctsd	4.68995e-191	2.16914	0.947	0.499	1.10955e-186	MG
Rpl6	5.64612e-191	0.816302	0.998	0.982	1.33576e-186	MG
Selenom	1.11815e-190	0.63519	0.607	0.145	2.64532e-186	MG
Gabarap	2.8489e-190	0.993272	0.99	0.785	6.73994e-186	MG
Plekhh2	1.08341e-189	0.450557	0.658	0.157	2.56313e-185	MG
Hadh	1.41828e-189	0.328955	0.599	0.13	3.35536e-185	MG
Gm10073	1.0931e-188	0.560521	0.77	0.219	2.58606e-184	MG
Nr4a3	6.59551e-188	0.400802	0.283	0.035	1.56037e-183	MG
Rps14	8.50724e-188	0.830396	1	0.987	2.01264e-183	MG
Slc7a5	1.98715e-187	0.582052	0.676	0.176	4.70121e-183	MG
Xpot	1.16629e-186	0.495	0.679	0.174	2.75921e-182	MG
Irf2bp2	1.39068e-186	0.721743	0.852	0.283	3.29006e-182	MG
Naaladl2	3.55201e-186	0.998881	0.803	0.267	8.40335e-182	MG
Afap1	6.15871e-186	0.31887	0.558	0.117	1.45703e-181	MG
Rrbp1	7.08207e-186	0.794717	0.87	0.306	1.67548e-181	MG
Psmb10	6.82171e-185	0.250354	0.452	0.082	1.61388e-180	MG
Rpl41	7.78776e-185	0.750306	1	0.995	1.84243e-180	MG
Ppia	9.73957e-185	0.999081	1	0.951	2.30419e-180	MG
Dusp10	1.30954e-184	0.347693	0.428	0.076	3.0981e-180	MG
Pole4	3.48226e-184	0.742682	0.826	0.277	8.23832e-180	MG
Ifngr2	5.25062e-184	0.372728	0.712	0.178	1.24219e-179	MG
Rpl26	7.41165e-184	0.896363	0.997	0.942	1.75345e-179	MG
Timm8a1	1.46499e-183	0.365999	0.615	0.142	3.46587e-179	MG
Stk35	1.60193e-183	0.493495	0.62	0.151	3.78984e-179	MG
Arf4	5.53829e-183	0.946086	0.957	0.427	1.31025e-178	MG
Wasf2	1.25749e-182	0.373224	0.643	0.154	2.97497e-178	MG
Tmco1	2.97706e-182	0.75308	0.938	0.378	7.04312e-178	MG
Rps24	1.98558e-181	1.01461	0.998	0.993	4.69749e-177	MG
Gab1	4.00288e-181	0.585656	0.706	0.186	9.47002e-177	MG
Mapk3	1.30316e-180	0.373439	0.669	0.165	3.08302e-176	MG
Lmo4	4.82746e-180	0.634956	0.863	0.281	1.14208e-175	MG
Sars	9.14967e-180	1.08011	0.99	0.661	2.16463e-175	MG
CT025619.1	2.92579e-179	0.318172	0.362	0.057	6.92184e-175	MG
Chn2	9.59129e-179	0.295592	0.434	0.079	2.26911e-174	MG
Gm2000	1.3903e-178	0.363553	0.669	0.165	3.28917e-174	MG
Eef2	2.77452e-178	0.909012	0.995	0.867	6.56397e-174	MG
Rnd2	4.19245e-178	0.251455	0.373	0.061	9.9185e-174	MG
Rpl30	2.23819e-177	0.944105	1	0.987	5.29511e-173	MG
Fat1	9.85334e-177	0.330857	0.622	0.145	2.3311e-172	MG
Cotl1	1.52565e-175	0.625427	0.791	0.251	3.60938e-171	MG
Fhl1	3.38696e-175	0.367783	0.622	0.15	8.01286e-171	MG
Csad	4.03054e-175	0.3431	0.592	0.137	9.53546e-171	MG
Creg1	3.0602e-174	0.42892	0.625	0.149	7.23982e-170	MG
Gnpda1	5.71765e-174	0.281892	0.53	0.112	1.35268e-169	MG
Mfap3l	5.86657e-174	0.718295	0.77	0.242	1.38791e-169	MG
Cdon	7.03985e-174	1.04219	0.747	0.247	1.66549e-169	MG
Pmepa1	1.7721e-173	1.49433	0.844	0.316	4.19244e-169	MG
Rps25	8.56525e-173	0.878126	0.997	0.962	2.02637e-168	MG
Nelfe	9.1589e-173	0.269621	0.577	0.129	2.16681e-168	MG
Cep83	1.01681e-172	0.312135	0.553	0.122	2.40556e-168	MG
Mlec	1.40661e-171	0.306253	0.594	0.137	3.32776e-167	MG
Glrb	2.24098e-171	0.260693	0.365	0.061	5.30172e-167	MG
Bbc3	2.66871e-171	0.25622	0.388	0.067	6.31364e-167	MG
Il1rapl1	6.55517e-171	0.936398	0.474	0.103	1.55082e-166	MG
Rit1	8.01062e-171	0.274553	0.541	0.118	1.89515e-166	MG
Prkg1	1.61143e-170	0.969654	0.98	0.631	3.81233e-166	MG
Mlxip	2.58808e-170	0.255029	0.444	0.085	6.12289e-166	MG
Synpr	2.62863e-170	0.97552	0.434	0.09	6.21882e-166	MG
Mthfd1l	3.42942e-170	0.308063	0.411	0.076	8.11331e-166	MG
Pdcd6	5.01225e-170	0.411396	0.789	0.224	1.1858e-165	MG
Psph	6.67868e-170	0.772839	0.775	0.257	1.58004e-165	MG
Rps3	1.66029e-169	0.806231	0.998	0.965	3.92792e-165	MG
Cttn	3.91218e-169	0.311427	0.674	0.168	9.25543e-165	MG
Lrrtm3	3.91966e-169	0.38156	0.288	0.04	9.27313e-165	MG
Kctd6	5.09665e-169	0.283389	0.482	0.098	1.20577e-164	MG
Agrn	5.61943e-169	0.323067	0.623	0.15	1.32945e-164	MG
Gldc	6.36826e-169	0.538506	0.727	0.205	1.5066e-164	MG
Maml2	7.44521e-169	0.704755	0.633	0.169	1.76139e-164	MG
Psap	2.089e-168	0.947033	0.961	0.53	4.94217e-164	MG
Cebpg	2.57392e-168	0.571801	0.78	0.239	6.08939e-164	MG
Trp53	3.44952e-168	0.331083	0.638	0.158	8.16087e-164	MG
Nxn	3.56343e-168	0.61043	0.59	0.15	8.43037e-164	MG
Id3	4.4148e-168	1.05641	0.41	0.082	1.04445e-163	MG
Tmtc2	5.38932e-168	1.01198	0.934	0.406	1.275e-163	MG
Rpl5	1.67202e-167	0.994015	0.998	0.943	3.95566e-163	MG
Soat1	5.58077e-167	0.332814	0.493	0.104	1.3203e-162	MG
Gria4	7.01926e-167	0.844927	0.837	0.312	1.66062e-162	MG
Rpl24	9.72802e-167	0.761439	1	0.982	2.30146e-162	MG
Srm	1.09859e-166	0.312	0.559	0.128	2.59905e-162	MG
Lrp10	1.19472e-166	0.250692	0.551	0.122	2.82646e-162	MG
Dbp	2.36677e-166	0.735416	0.77	0.261	5.59929e-162	MG
Akt1s1	3.58817e-166	0.258511	0.586	0.134	8.48888e-162	MG
Camk2n1	7.5751e-166	0.659973	0.814	0.274	1.79212e-161	MG
Brinp3	7.97522e-166	0.55012	0.265	0.035	1.88678e-161	MG
Hmgcl	9.1094e-166	0.301571	0.561	0.128	2.1551e-161	MG
Rcn2	1.00304e-165	0.436672	0.758	0.219	2.37299e-161	MG
Myo6	4.17616e-165	0.786224	0.891	0.36	9.87997e-161	MG
Rps7	1.1557e-164	0.824288	0.995	0.976	2.73416e-160	MG
Gmpr	4.1326e-164	0.253004	0.281	0.039	9.77691e-160	MG
Prdx1	4.8752e-164	1.03169	0.967	0.635	1.15337e-159	MG
Cfl2	9.05079e-164	0.917735	0.965	0.562	2.14124e-159	MG
Elmsan1	1.32269e-163	0.409787	0.513	0.113	3.12923e-159	MG
Reep5	5.46255e-163	0.5483	0.831	0.274	1.29233e-158	MG
Hmga1	7.10625e-163	0.311237	0.451	0.091	1.6812e-158	MG
Zfp36l2	1.17102e-162	0.825986	0.771	0.263	2.7704e-158	MG
Slc3a21	1.63981e-161	1.2143	0.951	0.55	3.87946e-157	MG
Tyw5	1.71873e-160	0.327028	0.646	0.163	4.06618e-156	MG
Rubcn	2.87639e-160	0.472387	0.694	0.2	6.80496e-156	MG
Bri3	9.06532e-160	0.867978	0.969	0.644	2.14467e-155	MG
Ero1l	1.24025e-159	0.791617	0.694	0.215	2.93417e-155	MG
Hax1	2.83713e-159	0.416698	0.709	0.201	6.71209e-155	MG
Efnb2	4.2084e-159	0.527305	0.493	0.113	9.95624e-155	MG
9330182L06Rik	5.54753e-159	0.277209	0.383	0.07	1.31244e-154	MG
Rps18	6.14482e-159	0.833438	0.985	0.769	1.45374e-154	MG
Marcks	8.25041e-159	0.988303	0.979	0.563	1.95188e-154	MG
Pde3a	2.1565e-158	0.880674	0.75	0.243	5.10185e-154	MG
Rps15	2.37411e-158	0.744977	0.998	0.973	5.61666e-154	MG
Appl2	2.60016e-158	0.26173	0.526	0.118	6.15147e-154	MG
Pepd	2.7194e-158	0.303832	0.609	0.151	6.43356e-154	MG
Hint1	2.83096e-158	0.815301	0.993	0.837	6.69748e-154	MG
Ephb1	8.72358e-158	0.349776	0.293	0.043	2.06382e-153	MG
Pdlim7	1.07919e-157	0.371264	0.641	0.167	2.55316e-153	MG
Krtcap2	1.50916e-157	1.1201	0.962	0.619	3.57037e-153	MG
1810058I24Rik	1.93089e-157	0.722347	0.918	0.387	4.56809e-153	MG
Crym	2.65035e-157	2.72318	0.901	0.489	6.27019e-153	MG
Lrrc58	6.21399e-157	0.549349	0.872	0.305	1.47011e-152	MG
Stard3nl	7.73217e-157	0.336249	0.688	0.185	1.82928e-152	MG
Sypl	7.89586e-157	0.403278	0.765	0.225	1.868e-152	MG
Ndnf	1.30199e-156	0.277714	0.538	0.127	3.08025e-152	MG
Bcl10	6.14582e-156	0.368314	0.692	0.189	1.45398e-151	MG
Rpl14	1.27166e-155	0.88757	0.993	0.928	3.0085e-151	MG
Olfm3	3.09398e-155	0.473697	0.28	0.041	7.31973e-151	MG
Efna5	3.3144e-155	0.687782	0.854	0.297	7.84121e-151	MG
Col4a6	4.91256e-155	0.25402	0.334	0.056	1.16221e-150	MG
Rps21	6.71211e-155	0.798704	0.998	0.995	1.58795e-150	MG
Camk4	1.44844e-154	0.273188	0.447	0.092	3.42673e-150	MG
Slc16a2	4.62157e-154	0.399837	0.556	0.136	1.09337e-149	MG
Asah1	1.16304e-153	0.435111	0.794	0.245	2.75152e-149	MG
Mdk	1.23046e-153	0.435835	0.311	0.05	2.91102e-149	MG
Derl1	2.03648e-153	0.450985	0.788	0.244	4.81791e-149	MG
Dab2ip	1.28256e-152	0.376514	0.73	0.209	3.03427e-148	MG
Mthfd2	7.52986e-152	0.334843	0.541	0.13	1.78142e-147	MG
Plxna4	8.08647e-152	0.480383	0.505	0.118	1.9131e-147	MG
Sdf2l1	2.81445e-151	0.621603	0.52	0.129	6.65843e-147	MG
Med21	3.05409e-151	0.351286	0.725	0.205	7.22535e-147	MG
Rps27rt	8.77091e-151	0.296926	0.637	0.166	2.07502e-146	MG
Pawr	1.34994e-150	0.38911	0.562	0.14	3.1937e-146	MG
Arl8a	3.94292e-150	0.479446	0.771	0.246	9.32815e-146	MG
Nsa2	4.28245e-150	0.899443	0.98	0.62	1.01314e-145	MG
Fyn	4.79468e-150	0.512621	0.816	0.269	1.13432e-145	MG
Irs1	1.30656e-149	0.297196	0.526	0.124	3.09106e-145	MG
Mgat4b	2.82229e-149	0.271832	0.533	0.125	6.67698e-145	MG
Asnsd1	3.70221e-149	0.268465	0.551	0.133	8.7587e-145	MG
Gnl3	8.41347e-149	0.416755	0.701	0.205	1.99046e-144	MG
Degs1	2.65147e-148	0.264821	0.646	0.168	6.27285e-144	MG
Arpc5l	4.21861e-148	0.580269	0.86	0.319	9.98039e-144	MG
Fzd3	4.64739e-148	0.366719	0.697	0.199	1.09948e-143	MG
Atp1a1	1.32317e-147	1.08502	0.951	0.618	3.13037e-143	MG
Rpl8	1.50678e-147	0.668693	0.998	0.97	3.56473e-143	MG
Uba52	1.57252e-147	0.737986	0.992	0.933	3.72026e-143	MG
Fosb	1.74458e-147	0.827512	0.65	0.195	4.12732e-143	MG
Cstb	2.55927e-147	0.879659	0.936	0.472	6.05471e-143	MG
Angptl6	5.47242e-147	0.275981	0.398	0.079	1.29467e-142	MG
Cdv3	7.44914e-147	0.667654	0.891	0.356	1.76232e-142	MG
Gm10076	2.59797e-146	0.789061	1	0.882	6.14627e-142	MG
Tmem159	3.6986e-146	0.423908	0.523	0.127	8.75015e-142	MG
Nol4	4.55656e-146	0.527348	0.653	0.186	1.07799e-141	MG
2700081O15Rik	5.19366e-146	0.255374	0.516	0.12	1.22872e-141	MG
Dag1	9.40647e-146	0.715055	0.819	0.308	2.22538e-141	MG
Ptpra	1.91261e-145	0.751341	0.962	0.521	4.52486e-141	MG
Cyfip1	1.91382e-145	0.313064	0.658	0.178	4.5277e-141	MG
Cdh2	4.27025e-144	1.08801	0.977	0.738	1.01026e-139	MG
St5	1.15868e-143	0.285451	0.51	0.121	2.74121e-139	MG
Iscu	3.90455e-143	0.447826	0.794	0.259	9.23738e-139	MG
Nedd4l	9.52544e-143	0.694535	0.762	0.258	2.25353e-138	MG
Gas7	1.47473e-142	0.279906	0.367	0.071	3.48892e-138	MG
Eprs	7.17113e-142	1.01203	0.977	0.605	1.69655e-137	MG
Tcf4	1.35449e-141	0.877107	0.997	0.843	3.20446e-137	MG
Morf4l1	2.03029e-141	0.688916	0.995	0.848	4.80326e-137	MG
Hspa9	2.99975e-141	0.966871	0.957	0.575	7.09681e-137	MG
Rpl7a	3.5406e-141	0.726006	0.995	0.893	8.37635e-137	MG
Psme2	4.23092e-141	0.385035	0.727	0.219	1.00095e-136	MG
Ptpn12	4.95505e-141	0.496741	0.859	0.304	1.17227e-136	MG
AI413582	6.00123e-141	0.280494	0.597	0.155	1.41977e-136	MG
Snx101	1.93969e-140	0.738625	0.918	0.416	4.58892e-136	MG
Tspan31	2.05772e-140	0.404376	0.794	0.255	4.86815e-136	MG
Cacng4	3.23929e-140	0.447618	0.385	0.079	7.66352e-136	MG
Btf3	1.30415e-139	0.734037	0.987	0.842	3.08536e-135	MG
3830406C13Rik	1.93449e-139	0.266207	0.6	0.157	4.57663e-135	MG
Asns	7.08963e-139	0.64091	0.735	0.259	1.67726e-134	MG
Gna11	1.29602e-138	0.260739	0.643	0.174	3.06612e-134	MG
Hsd17b12	1.86303e-138	0.652019	0.893	0.372	4.40756e-134	MG
Cpq	2.53325e-138	0.360522	0.604	0.166	5.99315e-134	MG
Mtss1l	1.0737e-137	0.421594	0.694	0.21	2.54017e-133	MG
Gnai3	1.30885e-136	0.332918	0.817	0.257	3.09647e-132	MG
Cyb5a	1.47373e-136	0.400876	0.729	0.227	3.48656e-132	MG
Vdac2	1.83179e-136	0.874323	0.984	0.814	4.33364e-132	MG
2610001J05Rik	2.50924e-136	0.291669	0.605	0.164	5.93637e-132	MG
Gpm6a	1.33045e-135	0.769027	0.89	0.382	3.14759e-131	MG
Chchd10	2.18411e-135	1.42408	0.998	0.934	5.16717e-131	MG
Rpl9	3.28703e-135	0.647759	0.995	0.983	7.77646e-131	MG
S100a6	8.45313e-135	0.94582	0.271	0.044	1.99984e-130	MG
Rdh10	1.13785e-134	0.647988	0.676	0.22	2.69193e-130	MG
Ak2	2.75741e-134	0.261949	0.628	0.171	6.52347e-130	MG
Insig2	4.31477e-134	0.446665	0.827	0.286	1.02079e-129	MG
Smim14	6.13107e-134	0.528276	0.885	0.34	1.45049e-129	MG
Pde4d	1.12387e-133	0.985366	0.939	0.474	2.65884e-129	MG
Rpl11	1.30084e-133	0.61862	0.997	0.97	3.07752e-129	MG
Arid5b	3.19368e-133	0.825502	0.929	0.417	7.5556e-129	MG
Ddx54	3.70526e-133	0.365615	0.776	0.245	8.76589e-129	MG
Ptprz1	3.78792e-133	0.298154	0.635	0.184	8.96146e-129	MG
Fermt2	1.4312e-132	0.727391	0.942	0.482	3.38592e-128	MG
Ckap4	2.76782e-132	0.499588	0.812	0.289	6.5481e-128	MG
Tbrg1	2.80723e-132	0.50641	0.863	0.321	6.64134e-128	MG
C1qbp	3.98153e-132	0.66964	0.921	0.411	9.4195e-128	MG
Zeb2	1.65682e-131	0.665436	0.933	0.404	3.91971e-127	MG
Brk1	4.32413e-131	0.533278	0.906	0.361	1.023e-126	MG
Lonp1	4.52613e-131	0.31844	0.609	0.171	1.07079e-126	MG
Pdia4	5.28134e-131	0.713191	0.776	0.275	1.24946e-126	MG
Bri3bp	6.45969e-131	0.26048	0.572	0.152	1.52823e-126	MG
Rpl29	8.09128e-131	0.762901	0.98	0.684	1.91423e-126	MG
Nrp1	2.14935e-130	0.416367	0.637	0.189	5.08492e-126	MG
Rbm3	2.31354e-130	0.768644	0.972	0.61	5.47338e-126	MG
Mapt	3.26745e-130	0.540384	0.566	0.154	7.73013e-126	MG
Ier21	1.21075e-129	1.07599	0.905	0.446	2.86439e-125	MG
Shmt2	1.40457e-129	0.252404	0.569	0.151	3.32292e-125	MG
Vat1l	1.43967e-129	0.878387	0.821	0.342	3.40598e-125	MG
Gna12	3.39269e-129	0.303707	0.66	0.193	8.02643e-125	MG
Kdelr1	5.19884e-129	0.381489	0.771	0.255	1.22994e-124	MG
Tmem256	3.17045e-128	0.760492	0.982	0.664	7.50065e-124	MG
Gm10260	3.33045e-128	0.687128	0.972	0.587	7.87917e-124	MG
Eif2s2	4.4332e-128	0.869001	0.992	0.791	1.04881e-123	MG
Cap1	6.97325e-128	0.310433	0.709	0.214	1.64973e-123	MG
Cerk	9.43075e-128	0.758879	0.862	0.397	2.23113e-123	MG
Ddost	1.00163e-127	0.476342	0.788	0.273	2.36966e-123	MG
Selenow	1.88608e-127	0.749798	0.998	0.89	4.46208e-123	MG
Carnmt1	4.68222e-127	0.299889	0.661	0.195	1.10772e-122	MG
Msl3	5.13874e-127	0.255838	0.577	0.156	1.21572e-122	MG
Cmip	1.97924e-126	0.421437	0.831	0.289	4.68248e-122	MG
Fbn2	3.25483e-126	0.558267	0.401	0.093	7.70028e-122	MG
Hspd1	3.27051e-126	0.826118	0.967	0.596	7.73737e-122	MG
Ywhah	3.45829e-126	0.541174	0.844	0.318	8.18162e-122	MG
Eif1	4.07736e-126	0.829207	1	0.987	9.64621e-122	MG
Mast4	4.95547e-126	0.394879	0.518	0.136	1.17237e-121	MG
Nus1	6.08415e-126	0.326122	0.684	0.207	1.43939e-121	MG
Txnl4a	6.80903e-126	0.445701	0.855	0.312	1.61088e-121	MG
Pim3	6.97103e-126	0.269446	0.436	0.102	1.64921e-121	MG
Ctps	1.04285e-125	0.266186	0.525	0.136	2.46717e-121	MG
Nhs	2.01686e-125	0.335977	0.61	0.175	4.77149e-121	MG
Rragd	2.80857e-125	0.437776	0.775	0.27	6.64452e-121	MG
Rnf7	4.1583e-125	0.695524	0.965	0.551	9.8377e-121	MG
Asap2	5.54523e-125	0.343637	0.604	0.172	1.31189e-120	MG
Dynlt3	5.5843e-125	0.310495	0.717	0.223	1.32113e-120	MG
Rac1	1.02042e-124	0.481611	0.885	0.348	2.41411e-120	MG
Il1rap	1.11512e-124	0.506315	0.49	0.129	2.63816e-120	MG
Erc1	1.19754e-124	0.359868	0.648	0.193	2.83313e-120	MG
Cdkn1b	2.72855e-124	0.652253	0.887	0.388	6.4552e-120	MG
Tpm3	2.96287e-124	0.384139	0.786	0.266	7.00956e-120	MG
Tpm4	5.30237e-124	0.2842	0.438	0.105	1.25443e-119	MG
Jcad	7.19795e-124	0.254656	0.53	0.139	1.70289e-119	MG
Cpne8	7.94049e-124	0.576824	0.383	0.089	1.87856e-119	MG
Rpl13a	1.44662e-123	0.671575	0.933	0.486	3.42243e-119	MG
Fuca1	2.97687e-122	0.477668	0.771	0.275	7.04268e-118	MG
Notch1	5.69222e-122	0.371293	0.697	0.223	1.34666e-117	MG
Magi3	7.1744e-122	0.988381	0.859	0.377	1.69732e-117	MG
Comt	8.21513e-121	0.455453	0.87	0.328	1.94353e-116	MG
Zmat3	1.04568e-120	0.273562	0.561	0.155	2.47387e-116	MG
Leprotl1	1.08207e-120	0.432202	0.794	0.284	2.55996e-116	MG
Cdc14a	3.81516e-120	0.704914	0.78	0.305	9.02592e-116	MG
Chpt1	3.0992e-119	0.33957	0.676	0.213	7.33208e-115	MG
2900097C17Rik	5.43217e-119	0.336683	0.814	0.276	1.28514e-114	MG
Tkt	2.82693e-118	0.311323	0.771	0.255	6.68794e-114	MG
Nipal3	4.7334e-118	0.365327	0.584	0.175	1.11983e-113	MG
Timm10	6.38312e-118	0.283403	0.666	0.203	1.51012e-113	MG
Rpl4	1.29357e-117	0.788138	0.988	0.841	3.06033e-113	MG
Gclc	1.32582e-117	0.372609	0.595	0.178	3.13663e-113	MG
Malat1	1.53134e-117	0.81552	1	1	3.62284e-113	MG
Trim35	1.95587e-117	0.366854	0.745	0.251	4.62721e-113	MG
Phactr2	2.16232e-117	0.503012	0.651	0.209	5.11563e-113	MG
Ctsa	2.29189e-117	0.371825	0.648	0.198	5.42216e-113	MG
Khdrbs3	4.16079e-117	0.745624	0.974	0.631	9.8436e-113	MG
Arpc5	6.205e-117	0.469444	0.911	0.368	1.46798e-112	MG
Cap2	7.0437e-117	0.313053	0.503	0.137	1.6664e-112	MG
Erh	9.89753e-117	0.744547	0.941	0.535	2.34156e-112	MG
Stmn1	5.20616e-116	0.39891	0.842	0.321	1.23167e-111	MG
Kcnc2	6.77732e-116	0.649974	0.253	0.045	1.60338e-111	MG
Ubald1	1.20024e-115	0.254895	0.587	0.169	2.83953e-111	MG
Lamp2	2.42009e-115	0.594004	0.944	0.483	5.72544e-111	MG
Ddah2	3.04257e-115	0.297926	0.633	0.193	7.19811e-111	MG
Ptp4a1	6.37274e-115	0.609268	0.859	0.339	1.50766e-110	MG
H2-D1	6.43653e-115	1.1056	0.832	0.402	1.52275e-110	MG
Ptma	2.43103e-114	0.603641	0.997	0.942	5.75133e-110	MG
Plxdc2	2.92067e-114	0.37472	0.549	0.16	6.90973e-110	MG
Rin2	3.16162e-114	0.341607	0.53	0.151	7.47975e-110	MG
Etfb	8.89442e-114	0.320122	0.688	0.223	2.10424e-109	MG
Maip1	1.51335e-113	0.340533	0.637	0.198	3.58028e-109	MG
Srsf9	1.55913e-113	0.514344	0.89	0.375	3.68859e-109	MG
Zfp330	1.16869e-112	0.366664	0.737	0.254	2.76488e-108	MG
Tceal8	1.20346e-112	0.400316	0.738	0.255	2.84714e-108	MG
Tprgl	7.96932e-112	0.348411	0.75	0.259	1.88538e-107	MG
Nfe2l1	1.2209e-111	0.542827	0.913	0.416	2.8884e-107	MG
Rpl21	1.30259e-111	0.584757	0.998	0.971	3.08167e-107	MG
Eif3c	2.67981e-111	0.817795	0.988	0.801	6.33988e-107	MG
Calu	3.09194e-111	0.370854	0.745	0.259	7.31492e-107	MG
Dab1	3.38832e-111	0.31153	0.724	0.252	8.01609e-107	MG
Nav3	6.10649e-111	0.548884	0.451	0.121	1.44467e-106	MG
Ddit3	2.11667e-110	1.12789	0.86	0.423	5.00762e-106	MG
Vps26a	8.02315e-110	0.255278	0.702	0.224	1.89812e-105	MG
Slc39a10	1.65489e-109	0.297654	0.602	0.183	3.91513e-105	MG
Snrpb2	1.02492e-108	0.327653	0.768	0.267	2.42475e-104	MG
Wsb2	1.30664e-108	0.325091	0.77	0.268	3.09125e-104	MG
Llph	1.65752e-108	0.587276	0.913	0.422	3.92136e-104	MG
Car2	2.00367e-108	1.37991	0.956	0.747	4.74029e-104	MG
Wars	3.68534e-108	0.283849	0.53	0.154	8.71877e-104	MG
Tars	4.14858e-108	0.392496	0.724	0.26	9.81471e-104	MG
Ctsz	5.05363e-108	0.465944	0.508	0.142	1.19559e-103	MG
Tnrc18	6.72559e-108	0.368451	0.729	0.253	1.59114e-103	MG
Rhob	1.1047e-107	0.391834	0.515	0.152	2.61351e-103	MG
Kif5b	2.57272e-107	0.687397	0.982	0.665	6.08654e-103	MG
Mtm1	3.15109e-107	0.320197	0.599	0.186	7.45486e-103	MG
Snx6	5.6054e-107	0.339653	0.791	0.285	1.32613e-102	MG
Eps15	1.27307e-106	0.403513	0.781	0.295	3.01184e-102	MG
Lpp	4.7424e-106	0.577376	0.91	0.405	1.12196e-101	MG
Sh3bgrl3	7.21805e-106	0.404025	0.812	0.306	1.70765e-101	MG
Pdcd6ip	1.54001e-105	0.277091	0.725	0.243	3.64336e-101	MG
Nars	2.02832e-105	0.727972	0.956	0.593	4.7986e-101	MG
Gm11808	4.86064e-105	0.349322	0.76	0.274	1.14993e-100	MG
Cbfb	6.27356e-105	0.292418	0.681	0.225	1.4842e-100	MG
Ssr3	1.0055e-104	0.425186	0.86	0.341	2.37881e-100	MG
Cited1	1.60324e-104	0.491459	0.431	0.119	3.79295e-100	MG
Pfn2	2.63854e-104	0.975717	0.883	0.475	6.24225e-100	MG
Irf1	3.06765e-104	0.456392	0.285	0.059	7.25745e-100	MG
Ech1	1.65465e-103	0.278486	0.683	0.224	3.91458e-99	MG
Bzw1	3.2452e-103	0.585203	0.959	0.548	7.6775e-99	MG
Fat3	5.0548e-103	0.297589	0.59	0.189	1.19586e-98	MG
Midn	5.44247e-103	0.274367	0.674	0.223	1.28758e-98	MG
Mrps6	1.03661e-102	0.27724	0.602	0.189	2.45242e-98	MG
Fkbp1a	2.42737e-102	0.587231	0.969	0.53	5.74268e-98	MG
Arpc4	4.32046e-102	0.295682	0.757	0.265	1.02214e-97	MG
Hcfc1r1	1.49591e-101	0.584333	0.911	0.436	3.53902e-97	MG
Mpc1	1.6923e-101	0.668786	0.951	0.555	4.00364e-97	MG
Rps23	5.13985e-101	0.695043	0.998	0.977	1.21599e-96	MG
Ly6e	7.40203e-101	0.273973	0.28	0.058	1.75117e-96	MG
Coro1b	1.29434e-100	0.312173	0.752	0.27	3.06214e-96	MG
Pld3	2.15224e-100	0.256698	0.605	0.19	5.09178e-96	MG
Rnf13	2.81226e-100	0.45245	0.84	0.351	6.65325e-96	MG
Fam213a	4.25907e-100	0.294686	0.714	0.248	1.00761e-95	MG
Hexb	4.62553e-100	0.475516	0.52	0.151	1.09431e-95	MG
Jtb	5.49522e-100	0.3973	0.86	0.345	1.30006e-95	MG
Epha3	9.94264e-100	0.301022	0.63	0.211	2.35223e-95	MG
Clstn2	1.29661e-99	1.35621	0.474	0.155	3.06753e-95	MG
Ccdc141	3.53261e-99	0.289796	0.564	0.179	8.35745e-95	MG
Pdia6	3.93598e-99	0.896895	0.873	0.44	9.31174e-95	MG
Tmf1	6.58016e-99	0.301549	0.747	0.266	1.55673e-94	MG
Eif3a	7.65208e-99	0.58056	0.942	0.515	1.81033e-94	MG
Dusp1	1.19225e-98	0.358268	0.339	0.081	2.82063e-94	MG
Slmap	4.79997e-98	0.857734	0.936	0.582	1.13558e-93	MG
Wscd1	1.33907e-97	0.330359	0.549	0.176	3.16797e-93	MG
Pdia3	1.89655e-97	0.921828	0.972	0.667	4.48685e-93	MG
Ost4	1.94624e-97	0.6603	0.97	0.658	4.60442e-93	MG
Sdc41	4.532e-97	0.749199	0.658	0.238	1.07218e-92	MG
Ptp4a2	6.81479e-97	0.69569	0.972	0.586	1.61224e-92	MG
Fndc3b	7.84214e-97	0.37764	0.768	0.288	1.85529e-92	MG
Magi1	9.7841e-97	0.737621	0.933	0.494	2.31472e-92	MG
Myo1e	1.07498e-96	0.440602	0.717	0.269	2.54318e-92	MG
Tmem55a	1.42211e-96	0.275064	0.752	0.267	3.36442e-92	MG
Arhgap21	1.52421e-96	0.362183	0.78	0.291	3.60598e-92	MG
Rpl27	3.17435e-96	0.561412	0.988	0.835	7.50989e-92	MG
Tmx3	3.34077e-96	0.331503	0.781	0.293	7.90359e-92	MG
Rpl22	4.24884e-96	0.59416	0.993	0.95	1.00519e-91	MG
Gab2	6.00913e-96	0.34841	0.661	0.23	1.42164e-91	MG
Dlgap4	8.00316e-96	0.327156	0.757	0.278	1.89339e-91	MG
Nfkb1	9.18313e-96	0.442959	0.553	0.175	2.17254e-91	MG
Npm1	1.00756e-95	0.698052	0.987	0.766	2.38368e-91	MG
Dars	1.08171e-95	0.325244	0.732	0.268	2.5591e-91	MG
Lrrc7	1.11665e-95	0.555039	0.362	0.096	2.64177e-91	MG
Dennd2a	1.27227e-95	0.266329	0.579	0.186	3.00995e-91	MG
Stx7	1.30025e-95	0.349862	0.816	0.315	3.07614e-91	MG
Sesn3	2.72073e-95	0.414951	0.826	0.332	6.43671e-91	MG
Bcl7a	2.74189e-95	0.307499	0.673	0.236	6.48675e-91	MG
Hopx	4.05958e-95	0.87134	0.766	0.33	9.60414e-91	MG
Pabpc1	4.81979e-95	0.681562	0.984	0.761	1.14027e-90	MG
Ywhaq	5.84407e-95	0.659861	0.988	0.762	1.38259e-90	MG
Pam	7.80303e-95	0.306115	0.692	0.242	1.84604e-90	MG
Hs3st1	5.99753e-94	0.281638	0.273	0.059	1.4189e-89	MG
Prkaa2	7.53062e-93	0.251881	0.531	0.166	1.78159e-88	MG
Mcl1	9.93805e-93	0.535162	0.86	0.386	2.35114e-88	MG
Imp3	1.39131e-92	0.304618	0.793	0.299	3.29157e-88	MG
Rpl3	6.41644e-92	0.541695	0.997	0.939	1.518e-87	MG
Epb41l4aos	2.00519e-91	0.411865	0.699	0.266	4.74388e-87	MG
Ugcg	2.15183e-91	0.327768	0.447	0.132	5.09079e-87	MG
Prkcsh	4.74351e-91	0.306864	0.753	0.281	1.12222e-86	MG
Inpp5f	8.52364e-91	0.311109	0.661	0.233	2.01652e-86	MG
Tpd52l2	1.05598e-90	0.25756	0.73	0.263	2.49824e-86	MG
Prpsap1	1.04367e-89	0.25469	0.61	0.207	2.46912e-85	MG
Fgf9	1.33265e-89	0.368713	0.692	0.261	3.15278e-85	MG
Dstn	1.28663e-88	0.717613	0.985	0.725	3.0439e-84	MG
Fam19a1	1.49155e-88	0.652292	0.263	0.058	3.52872e-84	MG
Syt11	1.84832e-88	0.419019	0.707	0.275	4.37274e-84	MG
Mrpl52	1.85925e-88	0.540046	0.967	0.615	4.39861e-84	MG
Ank3	4.22692e-88	0.968136	0.985	0.8	1e-83	MG
Ccdc50	4.96182e-88	0.429141	0.872	0.379	1.17387e-83	MG
Pcdh7	9.52062e-88	0.548769	0.661	0.264	2.25239e-83	MG
Arpc2	7.48324e-87	0.586662	0.979	0.69	1.77039e-82	MG
Lin7a	2.10406e-86	0.652638	0.845	0.382	4.97779e-82	MG
Tpm1	2.40198e-86	0.675405	0.674	0.265	5.68261e-82	MG
Eef1g	2.81264e-86	0.566685	0.972	0.645	6.65415e-82	MG
Snx5	3.05644e-86	0.322501	0.755	0.292	7.23094e-82	MG
2025-09-07	3.82886e-86	0.648516	0.98	0.653	9.05832e-82	MG
Capza2	7.34339e-86	0.497205	0.949	0.516	1.7373e-81	MG
Arpc3	3.84044e-85	0.503262	0.936	0.483	9.08571e-81	MG
H2afj	8.71691e-85	0.612399	0.967	0.635	2.06225e-80	MG
Mea1	8.73627e-85	0.309478	0.796	0.314	2.06683e-80	MG
G3bp1	1.29007e-84	0.286928	0.768	0.297	3.05206e-80	MG
Bax	5.10439e-84	0.64152	0.964	0.623	1.2076e-79	MG
Tmed7	7.36043e-84	0.277272	0.773	0.299	1.74133e-79	MG
Ptch1	8.65623e-84	0.270845	0.653	0.235	2.04789e-79	MG
Etf1	1.04056e-83	0.415747	0.873	0.402	2.46176e-79	MG
Atp6v1g1	1.84715e-83	0.58962	0.988	0.877	4.37e-79	MG
Adgrl3	2.80313e-83	0.505156	0.929	0.482	6.63164e-79	MG
Herpud1	3.43135e-83	0.33963	0.688	0.263	8.11788e-79	MG
Dtnbp1	3.83125e-83	0.252196	0.737	0.275	9.06398e-79	MG
Ldhb	5.2607e-83	0.830347	0.903	0.531	1.24458e-78	MG
Rap1b	9.45208e-83	0.323783	0.854	0.357	2.23617e-78	MG
Retreg1	1.00241e-82	0.316563	0.451	0.14	2.37149e-78	MG
Rab11a	2.1186e-82	0.341134	0.88	0.378	5.01219e-78	MG
Selenof	2.94128e-81	0.565666	0.984	0.757	6.95849e-77	MG
Aldoc	4.0149e-81	0.268565	0.331	0.088	9.49845e-77	MG
Pid1	2.87059e-80	0.252278	0.414	0.124	6.79125e-76	MG
Erbin	3.18086e-80	0.616025	0.938	0.521	7.52527e-76	MG
Lamtor1	1.03186e-79	0.423414	0.923	0.455	2.44117e-75	MG
Hdgf	1.59035e-79	0.507897	0.921	0.498	3.76245e-75	MG
Srgap2	2.11926e-79	0.339309	0.743	0.297	5.01376e-75	MG
Reln	6.99511e-79	0.658601	0.319	0.09	1.6549e-74	MG
Krcc1	1.0385e-78	0.299619	0.735	0.292	2.45688e-74	MG
Pabpc4	1.95164e-78	0.439894	0.852	0.399	4.6172e-74	MG
Pcbp1	2.25694e-78	0.510546	0.967	0.687	5.33946e-74	MG
Bccip	3.53615e-78	0.269584	0.778	0.306	8.36582e-74	MG
2810004N23Rik	4.1612e-78	0.285821	0.742	0.294	9.84457e-74	MG
Thra	5.06811e-78	0.396124	0.938	0.454	1.19901e-73	MG
Mfhas1	1.51009e-77	0.284523	0.775	0.312	3.57257e-73	MG
Wwtr11	3.24535e-77	0.440098	0.868	0.404	7.67785e-73	MG
Spry21	5.2507e-77	0.527352	0.819	0.38	1.24221e-72	MG
Cbx4	6.8552e-77	0.297199	0.702	0.278	1.6218e-72	MG
Selenos	1.20592e-76	0.499537	0.931	0.51	2.85296e-72	MG
Bag1	1.2751e-76	0.409709	0.923	0.463	3.01663e-72	MG
Cdh20	3.58749e-76	0.352308	0.725	0.303	8.48729e-72	MG
Tmed2	5.59628e-76	0.450386	0.939	0.507	1.32397e-71	MG
Bola3	7.38682e-76	0.366564	0.845	0.383	1.74757e-71	MG
Ttyh11	8.85029e-76	0.521628	0.831	0.401	2.0938e-71	MG
Tpp1	1.28448e-75	0.393399	0.865	0.409	3.03883e-71	MG
Dner	3.94105e-75	0.315025	0.339	0.096	9.32374e-71	MG
Gm15417	4.1406e-75	0.267401	0.724	0.284	9.79583e-71	MG
Rtn4	5.04636e-75	0.729081	0.997	0.906	1.19387e-70	MG
Htra1	1.58289e-74	0.274174	0.344	0.098	3.74481e-70	MG
Eif5	4.49335e-74	0.582349	0.957	0.619	1.06304e-69	MG
Vdac3	5.38491e-74	0.499914	0.967	0.571	1.27396e-69	MG
Hspa5	6.1743e-74	1.51696	0.965	0.731	1.46072e-69	MG
Canx	7.49255e-74	0.525651	0.975	0.66	1.77259e-69	MG
Dnaja1	7.52262e-74	0.572139	0.982	0.721	1.7797e-69	MG
Map4	1.43429e-73	0.434457	0.954	0.51	3.39325e-69	MG
Sec61b	6.235e-73	0.661179	0.956	0.654	1.47508e-68	MG
Hmg20b	2.40543e-72	0.288976	0.791	0.332	5.69077e-68	MG
Gnas	5.19829e-72	0.499208	0.993	0.906	1.22981e-67	MG
H1f0	8.10852e-72	0.490856	0.755	0.351	1.91831e-67	MG
Parp8	1.31645e-71	0.316492	0.819	0.346	3.11445e-67	MG
Rhoa	2.48477e-71	0.484052	0.956	0.625	5.87846e-67	MG
Ctsb	2.39931e-70	0.800996	0.839	0.373	5.6763e-66	MG
Drap1	3.2178e-70	0.432784	0.949	0.564	7.61266e-66	MG
Erp29	3.47516e-70	0.447144	0.911	0.474	8.22153e-66	MG
Tex264	2.20674e-69	0.309455	0.798	0.349	5.2207e-65	MG
Strn3	3.10929e-69	0.706247	0.993	0.783	7.35596e-65	MG
Eif4a1	5.24861e-69	0.604789	0.985	0.763	1.24172e-64	MG
Rpl36al	5.29569e-69	0.456512	0.974	0.614	1.25285e-64	MG
Naca	1.50017e-68	0.42335	0.995	0.937	3.54909e-64	MG
Noct	1.56883e-68	0.298951	0.393	0.129	3.71154e-64	MG
Csnk1e	1.89144e-68	0.293568	0.814	0.352	4.47478e-64	MG
Insr	8.20622e-68	0.563792	0.832	0.425	1.94143e-63	MG
Mphosph6	1.01832e-67	0.258201	0.589	0.223	2.40914e-63	MG
Ctnnd2	1.63584e-67	0.479696	0.824	0.409	3.87008e-63	MG
Kif3a	1.84983e-67	0.290879	0.786	0.34	4.37633e-63	MG
Vapa	2.23501e-67	0.490577	0.984	0.751	5.28759e-63	MG
Atp6v1f	8.91073e-67	0.468838	0.977	0.744	2.1081e-62	MG
Txnl1	1.01449e-66	0.397331	0.929	0.511	2.40007e-62	MG
H2afz	3.22723e-66	0.536248	0.982	0.816	7.63498e-62	MG
Fos	4.23958e-66	1.52705	0.91	0.649	1.003e-61	MG
Dtna	4.329e-66	0.312183	0.814	0.369	1.02416e-61	MG
Hdlbp	7.96413e-66	0.350094	0.872	0.423	1.88415e-61	MG
Srgap1	2.76927e-65	0.317092	0.319	0.096	6.55155e-61	MG
Svil1	3.10185e-65	0.437469	0.778	0.363	7.33836e-61	MG
Snx3	4.37318e-65	0.422852	0.957	0.581	1.03461e-60	MG
Evi5	8.69779e-65	0.281427	0.844	0.379	2.05772e-60	MG
Creld2	1.21303e-64	0.304637	0.502	0.184	2.86978e-60	MG
St3gal3	1.31567e-64	0.553945	0.765	0.37	3.11262e-60	MG
Mbd2	2.80558e-64	0.298036	0.822	0.375	6.63743e-60	MG
Fth11	1.21839e-63	0.731262	0.998	0.996	2.88247e-59	MG
Rps6	1.72994e-63	0.484812	0.998	0.899	4.0927e-59	MG
Ier31	2.01474e-63	1.12877	0.73	0.376	4.76647e-59	MG
Zfand5	3.9763e-63	0.63414	0.977	0.745	9.40712e-59	MG
Selenok	4.52473e-63	0.453587	0.992	0.851	1.07046e-58	MG
Pomp	6.44408e-63	0.495893	0.946	0.609	1.52454e-58	MG
Nckap5	1.23532e-62	0.421925	0.679	0.32	2.92251e-58	MG
Bex3	1.6645e-62	0.454708	0.964	0.61	3.93786e-58	MG
Sfr1	2.03375e-62	0.440711	0.947	0.564	4.81145e-58	MG
Phlpp1	2.64267e-62	0.638409	0.952	0.593	6.25204e-58	MG
Tnik	7.72428e-62	0.417262	0.931	0.502	1.82741e-57	MG
Sel1l	1.27996e-60	0.341296	0.84	0.406	3.02813e-56	MG
mt-Co2	1.44599e-60	0.529361	1	0.999	3.42092e-56	MG
Slc2a11	1.56918e-60	0.451126	0.737	0.345	3.71237e-56	MG
Glrx3	2.32038e-60	0.349583	0.933	0.492	5.48955e-56	MG
Psenen	3.22805e-60	0.38637	0.947	0.576	7.63692e-56	MG
Atp2a2	4.06249e-60	0.670127	0.946	0.603	9.61103e-56	MG
Ube2d3	4.91105e-60	0.424555	0.977	0.684	1.16186e-55	MG
Ppp1r2	4.12229e-59	0.304773	0.86	0.409	9.75252e-55	MG
Jund1	6.23587e-59	0.733188	0.977	0.821	1.47528e-54	MG
Ptprg	6.50086e-59	0.44342	0.873	0.452	1.53797e-54	MG
Eif1ax	9.7267e-59	0.372714	0.913	0.505	2.30114e-54	MG
Eif3i	1.1441e-58	0.362084	0.928	0.505	2.70672e-54	MG
Ppfia1	1.14903e-58	0.368498	0.771	0.366	2.71836e-54	MG
Tm9sf2	3.59395e-58	0.268517	0.804	0.367	8.50256e-54	MG
Rala	4.00383e-58	0.317689	0.901	0.462	9.47227e-54	MG
Banf1	4.80694e-58	0.290226	0.9	0.439	1.13723e-53	MG
Ptprs	6.12806e-58	0.317242	0.878	0.435	1.44978e-53	MG
Pnpla8	9.2595e-58	0.250351	0.844	0.389	2.19061e-53	MG
Polr2l	1.11596e-57	0.272482	0.793	0.364	2.64014e-53	MG
Sox4	1.45417e-57	0.39813	0.811	0.39	3.44027e-53	MG
Rab7	2.40838e-57	0.337358	0.921	0.496	5.69774e-53	MG
Sub1	2.75582e-57	0.431158	0.975	0.77	6.51971e-53	MG
Eif3j1	3.06794e-57	0.370414	0.942	0.551	7.25814e-53	MG
Cript	3.74925e-57	0.28793	0.91	0.455	8.86997e-53	MG
Zfp91	3.9395e-57	0.501404	0.979	0.805	9.32007e-53	MG
Map4k4	6.49884e-57	0.431808	0.951	0.579	1.5375e-52	MG
Lbh	1.06179e-56	0.324008	0.738	0.352	2.51198e-52	MG
Tenm2	3.94246e-56	0.401944	0.684	0.341	9.32708e-52	MG
Tmsb4x1	5.39259e-56	1.12091	0.985	0.873	1.27578e-51	MG
Nckap1	2.24048e-55	0.391243	0.942	0.55	5.30053e-51	MG
Eif4g2	4.86452e-55	0.498166	0.992	0.925	1.15085e-50	MG
1700025G04Rik	1.10157e-54	0.268704	0.676	0.301	2.60609e-50	MG
Capzb	4.80333e-54	0.347687	0.926	0.517	1.13637e-49	MG
Sec61g	9.06283e-54	0.445527	0.992	0.924	2.14408e-49	MG
Atf31	9.20004e-54	0.916401	0.638	0.32	2.17655e-49	MG
Denr	1.25432e-53	0.298142	0.895	0.455	2.96746e-49	MG
Tmed9	1.71677e-53	0.384783	0.944	0.556	4.06154e-49	MG
Tmsb10	6.06876e-53	0.704258	0.988	0.797	1.43575e-48	MG
Ubc1	1.04898e-52	0.541228	0.962	0.68	2.48168e-48	MG
Tubb4b	1.77851e-52	0.319251	0.808	0.392	4.20761e-48	MG
Serinc1	2.15502e-52	0.278436	0.91	0.463	5.09835e-48	MG
Bola2	2.33709e-52	0.350424	0.942	0.552	5.52908e-48	MG
2410015M20Rik	4.78138e-52	0.420817	0.938	0.619	1.13118e-47	MG
Lrrc4c	5.65309e-52	0.406324	0.839	0.444	1.33741e-47	MG
Tmem50a	8.64274e-52	0.254428	0.85	0.413	2.0447e-47	MG
Ran	1.24744e-51	0.431977	0.982	0.782	2.95119e-47	MG
Tbcb	6.00416e-51	0.34166	0.893	0.499	1.42047e-46	MG
Itm2b	1.71369e-50	0.628392	0.988	0.844	4.05425e-46	MG
Susd6	1.94381e-50	0.313095	0.859	0.44	4.59866e-46	MG
Hivep2	3.51344e-50	0.350871	0.793	0.392	8.31209e-46	MG
Dennd5a	4.26e-50	0.335505	0.877	0.483	1.00783e-45	MG
Ube2r2	7.03562e-50	0.322102	0.923	0.517	1.66449e-45	MG
Ssr4	1.77443e-49	0.395294	0.906	0.544	4.19796e-45	MG
Cuta	3.13323e-49	0.355277	0.911	0.554	7.41259e-45	MG
Gadd45a1	5.38736e-49	0.372195	0.689	0.341	1.27454e-44	MG
Calr	9.54325e-48	0.694083	0.929	0.685	2.25774e-43	MG
Ube2e1	1.12958e-47	0.274962	0.877	0.457	2.67236e-43	MG
Khdrbs2	2.22427e-47	0.320143	0.365	0.139	5.26217e-43	MG
Eif3h	2.72565e-47	0.353811	0.982	0.724	6.44834e-43	MG
St13	3.74286e-47	0.355555	0.99	0.842	8.85487e-43	MG
Ddt	4.08055e-47	0.458236	0.888	0.558	9.65377e-43	MG
Acp1	4.95765e-47	0.258362	0.88	0.446	1.17288e-42	MG
Eno1	6.07024e-47	1.01293	0.984	0.889	1.4361e-42	MG
Ube2b	8.1435e-47	0.345379	0.961	0.602	1.92659e-42	MG
Gdi2	1.41452e-46	0.312884	0.942	0.524	3.34646e-42	MG
Pkn2	1.48024e-46	0.331882	0.923	0.544	3.50195e-42	MG
Mxi1	3.09922e-46	0.384843	0.834	0.466	7.33212e-42	MG
Atxn7l1	2.02452e-45	0.36325	0.738	0.371	4.7896e-41	MG
Atox1	3.93232e-45	0.408803	0.919	0.594	9.30309e-41	MG
Fxr1	7.58777e-45	0.299817	0.929	0.53	1.79511e-40	MG
Rps17	8.06174e-45	0.334884	0.998	0.964	1.90725e-40	MG
Cdkn1c	8.36041e-45	0.32005	0.293	0.103	1.9779e-40	MG
Tceal9	1.72605e-44	0.357519	0.956	0.594	4.0835e-40	MG
Srp9	1.82886e-44	0.288385	0.924	0.527	4.32671e-40	MG
Ctnnb1	5.85043e-44	0.26933	0.918	0.498	1.38409e-39	MG
Tceal5	6.44866e-44	0.25874	0.278	0.096	1.52563e-39	MG
Txn1	7.89272e-44	0.371915	0.957	0.603	1.86726e-39	MG
Prkar1a	8.91242e-44	0.331316	0.946	0.557	2.1085e-39	MG
Sec11c	9.55692e-44	0.365299	0.794	0.425	2.26098e-39	MG
Fundc2	1.31243e-43	0.250489	0.862	0.453	3.10494e-39	MG
Cox14	1.63104e-43	0.358171	0.939	0.61	3.8587e-39	MG
Cebpd1	7.10565e-43	0.724032	0.855	0.56	1.68106e-38	MG
Aars	1.43218e-42	0.275658	0.857	0.485	3.38825e-38	MG
Glrx2	3.3465e-42	0.322603	0.926	0.574	7.91715e-38	MG
Mrpl30	3.99492e-42	0.302378	0.942	0.583	9.45118e-38	MG
Gpx1	1.20827e-41	0.268908	0.742	0.371	2.85852e-37	MG
Fgf13	1.23983e-41	0.319132	0.735	0.376	2.93319e-37	MG
Anp32b	2.13637e-41	0.35375	0.947	0.618	5.05422e-37	MG
Btg21	3.55197e-41	0.766686	0.898	0.661	8.40324e-37	MG
Hmgn3	2.03718e-40	0.349386	0.923	0.557	4.81955e-36	MG
Aamp	2.866e-40	0.255196	0.914	0.523	6.78039e-36	MG
Nenf	3.38861e-40	0.273739	0.908	0.514	8.01677e-36	MG
Serf2	4.46231e-40	0.40224	0.997	0.961	1.05569e-35	MG
Spcs1	1.00585e-39	0.345884	0.965	0.636	2.37964e-35	MG
Fyttd1	1.73903e-39	0.306343	0.919	0.538	4.11419e-35	MG
Cdc42	4.15641e-39	0.34508	0.987	0.798	9.83324e-35	MG
Tm9sf3	6.16012e-39	0.289619	0.934	0.565	1.45736e-34	MG
mt-Co3	7.58112e-39	0.412548	1	1	1.79354e-34	MG
Manf	8.91075e-39	0.747925	0.942	0.667	2.1081e-34	MG
Dnajb11	1.11663e-38	0.305589	0.847	0.461	2.64172e-34	MG
Ttc3	1.96721e-38	0.258264	0.977	0.677	4.65402e-34	MG
Chmp5	2.10142e-38	0.262153	0.934	0.549	4.97154e-34	MG
Pebp1	4.81465e-38	0.415423	0.993	0.859	1.13905e-33	MG
Rabep1	5.099e-38	0.318929	0.954	0.608	1.20632e-33	MG
Cacnb4	1.76034e-37	0.439572	0.367	0.157	4.16462e-33	MG
Csnk1a1	2.80735e-37	0.304507	0.993	0.849	6.64163e-33	MG
Sdhb	5.71756e-37	0.293757	0.914	0.563	1.35266e-32	MG
Akr1a1	5.7755e-37	0.299638	0.964	0.613	1.36637e-32	MG
D8Ertd738e	7.02331e-37	0.265144	0.931	0.578	1.66157e-32	MG
Snhg6	4.57357e-36	0.638347	0.849	0.558	1.08202e-31	MG
Eif5a	5.38219e-36	0.298023	0.98	0.692	1.27332e-31	MG
Cltc	5.53991e-36	0.307933	0.961	0.63	1.31063e-31	MG
Larp4b	3.38082e-35	0.279015	0.926	0.578	7.99835e-31	MG
Actr3	3.68764e-35	0.253095	0.928	0.544	8.72421e-31	MG
Igf1r	5.39831e-35	0.426455	0.98	0.781	1.27713e-30	MG
Dip2b	1.69883e-34	0.375888	0.974	0.694	4.01908e-30	MG
mt-Nd3	3.2813e-34	0.414288	0.985	0.857	7.76291e-30	MG
Ppp1ca	4.22877e-34	0.285258	0.931	0.591	1.00044e-29	MG
Myl6	5.16093e-34	0.35979	0.993	0.911	1.22097e-29	MG
Hnrnpk	6.68575e-34	0.287478	0.992	0.861	1.58171e-29	MG
Taf10	9.3305e-34	0.292243	0.946	0.621	2.20741e-29	MG
Crb1	1.65507e-33	0.371139	0.763	0.445	3.91557e-29	MG
Pdcd4	1.13756e-32	0.382734	0.931	0.607	2.69123e-28	MG
Hnrnpab	1.27633e-32	0.270335	0.938	0.587	3.01954e-28	MG
Eif3f	2.09021e-32	0.303914	0.977	0.822	4.94501e-28	MG
Pcp4	5.00225e-32	0.335334	0.336	0.15	1.18343e-27	MG
Nfkbia	6.62614e-32	0.889551	0.546	0.314	1.56761e-27	MG
Mgst3	2.58535e-31	0.443766	0.467	0.239	6.11643e-27	MG
Hsp90b1	2.84726e-31	0.815804	0.985	0.871	6.73606e-27	MG
Slc25a4	8.10342e-31	0.414862	1	0.98	1.91711e-26	MG
Kdm5a	8.39159e-31	0.258908	0.844	0.47	1.98528e-26	MG
Atp6v1e1	1.38664e-30	0.298586	0.984	0.75	3.2805e-26	MG
Tcf25	3.39195e-30	0.279862	0.982	0.704	8.02467e-26	MG
Dclk1	4.7768e-30	0.390961	0.406	0.196	1.1301e-25	MG
Hmgb2	1.49713e-29	0.280256	0.854	0.492	3.5419e-25	MG
Gpm6b1	2.44011e-29	0.314842	0.987	0.823	5.77281e-25	MG
Elf2	2.63888e-29	0.27785	0.911	0.578	6.24305e-25	MG
Erbb4	3.96072e-29	0.438746	0.25	0.103	9.37027e-25	MG
Plcb11	1.86741e-28	0.288439	0.668	0.399	4.41793e-24	MG
Tmed10	5.37467e-28	0.255144	0.967	0.699	1.27154e-23	MG
Swi5	3.30391e-27	0.266234	0.942	0.652	7.8164e-23	MG
Calm3	8.44892e-27	0.265747	0.946	0.615	1.99885e-22	MG
Ghitm	1.3718e-26	0.258576	0.969	0.718	3.24539e-22	MG
Ifrd1	2.50824e-26	0.570963	0.893	0.561	5.934e-22	MG
Lcn2	1.0797e-25	3.07497	0.488	0.246	2.55436e-21	MG
Eif1b	3.62584e-25	0.322995	0.939	0.681	8.57801e-21	MG
Hes5	1.15423e-24	0.390239	0.26	0.113	2.73068e-20	MG
mt-Nd1	1.16184e-24	0.339806	1	0.994	2.74869e-20	MG
mt-Atp6	4.53125e-24	0.306429	0.998	0.999	1.072e-19	MG
Tcea1	9.48503e-23	0.315718	0.936	0.712	2.24397e-18	MG
Ndufa13	4.01107e-22	0.308019	0.984	0.899	9.48939e-18	MG
Maged1	8.31696e-22	0.464048	0.783	0.462	1.96763e-17	MG
Taf15	6.38721e-20	0.270352	0.906	0.597	1.51109e-15	MG
Chka	6.64633e-19	0.409768	0.75	0.451	1.57239e-14	MG
Ppp3ca	5.46032e-18	0.254602	0.995	0.931	1.2918e-13	MG
Atp1b1	9.31835e-18	0.321381	0.257	0.128	2.20454e-13	MG
Ppib	3.44349e-17	0.254508	0.987	0.867	8.14661e-13	MG
2025-06-01	4.65583e-16	0.678662	0.872	0.644	1.10148e-11	MG
Galnt17	3.48439e-15	0.312618	0.342	0.197	8.24337e-11	MG
Csmd1	9.6591e-13	0.386266	0.186	0.304	2.28515e-08	MG
Junb1	9.66745e-12	0.333445	0.888	0.683	2.28713e-07	MG
Ckb	1.1728e-10	0.407819	0.997	0.917	2.7746e-06	MG
Rbfox1	0.00104474	0.309459	0.34	0.355	1	MG
Asic2	0	4.30994	0.965	0.363	0	AC
Zfp804a	0	4.18778	0.93	0.293	0	AC
Kcnip4	0	3.96659	0.894	0.555	0	AC
Gria41	0	3.72504	1	0.295	0	AC
Grik2	0	3.68383	0.981	0.289	0	AC
Mgat4c	0	3.61212	0.849	0.178	0	AC
Cntnap2	0	3.53921	0.772	0.293	0	AC
Anks1b	0	3.49794	0.994	0.236	0	AC
Lrfn5	0	3.43544	0.691	0.1	0	AC
Nrg3	0	3.3759	0.959	0.362	0	AC
Ebf1	0	3.34823	0.697	0.101	0	AC
Nrxn1	0	3.21118	0.995	0.478	0	AC
Meg3	0	3.18363	0.988	0.374	0	AC
Tenm21	0	3.13792	0.871	0.325	0	AC
Ptprt	0	3.11666	0.711	0.167	0	AC
Ncam2	0	3.09171	0.794	0.123	0	AC
Lhfp	0	3.06204	0.853	0.096	0	AC
Dab11	0	3.03047	0.863	0.236	0	AC
Cacna2d3	0	2.9876	0.706	0.13	0	AC
Nckap51	0	2.97621	0.873	0.303	0	AC
Celf4	0	2.92279	0.995	0.542	0	AC
Fam155a	0	2.89604	0.991	0.42	0	AC
Stmn11	0	2.83161	0.927	0.307	0	AC
Lingo2	0	2.81069	0.727	0.095	0	AC
Basp11	0	2.76331	0.969	0.267	0	AC
Grm8	0	2.70937	0.871	0.283	0	AC
Kirrel3	0	2.70152	0.63	0.154	0	AC
Slc24a3	0	2.69854	0.867	0.271	0	AC
Rasgef1b	0	2.66048	0.972	0.361	0	AC
Kcnh7	0	2.6536	0.817	0.178	0	AC
Gria2	0	2.55632	0.984	0.211	0	AC
Pax61	0	2.55159	0.963	0.149	0	AC
Grin2b	0	2.49708	0.927	0.074	0	AC
Galntl6	0	2.46074	0.589	0.099	0	AC
Lgr5	0	2.45247	0.735	0.196	0	AC
Lamp5	0	2.4086	0.484	0.026	0	AC
Lrrc4c1	0	2.39144	0.899	0.434	0	AC
Pde4d1	0	2.36504	0.978	0.463	0	AC
Galnt171	0	2.35998	0.832	0.169	0	AC
Gabrg3	0	2.35589	0.588	0.064	0	AC
Tmtc21	0	2.25258	0.936	0.397	0	AC
Ctnnd21	0	2.24363	0.97	0.394	0	AC
Cacna1d1	0	2.21753	0.952	0.191	0	AC
Csmd3	0	2.14612	0.663	0.123	0	AC
Ctnna2	0	2.14436	0.99	0.575	0	AC
Egfem1	0	2.12565	0.491	0.06	0	AC
Nol41	0	2.11512	0.92	0.164	0	AC
Tagln3	0	2.1068	0.878	0.174	0	AC
Nkain3	0	2.09635	0.661	0.061	0	AC
Astn2	0	2.07744	0.904	0.336	0	AC
Nnat	0	2.07698	0.918	0.319	0	AC
Fat31	0	2.05724	0.807	0.171	0	AC
Nrxn3	0	2.05632	1	0.967	0	AC
Frmd4a	0	2.03969	0.944	0.351	0	AC
Cdk14	0	2.00639	0.893	0.154	0	AC
Kctd16	0	1.99762	0.54	0.102	0	AC
Auts2	0	1.9974	0.995	0.599	0	AC
Zfpm2	0	1.99719	0.79	0.26	0	AC
Ralyl	0	1.98544	0.519	0.11	0	AC
Necab1	0	1.98306	0.626	0.024	0	AC
Adgrl31	0	1.97245	0.973	0.472	0	AC
Ebf3	0	1.96725	0.512	0.039	0	AC
Ttc31	0	1.96334	0.991	0.67	0	AC
Elavl3	0	1.95738	0.914	0.053	0	AC
Ptma1	0	1.94714	0.993	0.941	0	AC
Nwd2	0	1.946	0.57	0.038	0	AC
Prkcb	0	1.93928	0.779	0.103	0	AC
Trpm31	0	1.93793	0.845	0.254	0	AC
C230004F18Rik	0	1.93462	0.888	0.163	0	AC
Mdga2	0	1.92278	0.984	0.619	0	AC
Rtn1	0	1.92244	0.971	0.611	0	AC
Robo1	0	1.91645	0.498	0.103	0	AC
Sntg11	0	1.90782	0.755	0.169	0	AC
Tfap2b	0	1.90355	0.43	0.05	0	AC
Nebl1	0	1.87737	0.705	0.097	0	AC
Nhlh2	0	1.84068	0.606	0.022	0	AC
[truncated: 4,147 more rows]

## Sheet: Cell proportions
	Ctrl		Mef2c overexpression
Cell type	Number	Fraction	Number	Fraction
AC/HC	541	0.0726662	399	0.0333919
BC	477	0.0640698	401	0.0335593
Cones	199	0.0267293	373	0.031216
Cone Precursors	0	0	679	0.0568248
MG	101	0.0135662	507	0.0424303
Rods	6127	0.822968	3297	0.275923
Rod Precursors	0	0	3832	0.320696
Neurogenic RPCs	0	0	2461	0.205959
Total	7445	1	11949	1
