# Supplementary material for: Heterochronic transcription factor expression drives cone-dominant retina development in 13-lined ground squirrels
Source: bioRxiv preprint, doi:10.1101/2025.04.25.650540, version 6 (2026-01-13)
Supplement: Supplemental Table 10 [file 650540_file25.xlsx]

## Sheet: LGS13
peaks	class	gene	index	Correlation	FDR	Class	conserved
Itri7:4854761-4855261	TSS	Aanat	Aanat Itri7:4854761-4855261	0.679431	1.51771e-66	Other	No
Itri7:4855406-4855906	TSS	Aanat	Aanat Itri7:4855406-4855906	0.825114	3.71559e-122	Other	Yes
Itri7:4856154-4856654	TSS	Aanat	Aanat Itri7:4856154-4856654	0.463643	1.76093e-26	Other	Yes
Itri7:19410322-19410822	TSS	Aarsd1	Aarsd1 Itri7:19410322-19410822	0.267587	9.38747e-09	Promoter	Yes
Itri7:19410860-19411360	TSS	Aarsd1	Aarsd1 Itri7:19410860-19411360			Promoter	No
Itri7:134970493-134970993	TSS	AARSD1	AARSD1 Itri7:134970493-134970993			Other	No
Itri14:27705954-27706454	TSS	Aasdh	Aasdh Itri14:27705954-27706454	0.518963	4.31306e-34	PEs	No
Itri14:27706970-27707470	TSS	Aasdh	Aasdh Itri14:27706970-27707470	0.522743	1.15251e-34	Promoter	No
Itri7:35754052-35754552	TSS	Aatf	Aatf Itri7:35754052-35754552			PEs	No
Itri7:35754772-35755272	TSS	Aatf	Aatf Itri7:35754772-35755272	0.521631	1.70255e-34	Promoter	Yes
Itri7:35755390-35755890	TSS	Aatf	Aatf Itri7:35755390-35755890			Promoter	No
Itri3:176088353-176088853	TSS	Abca1	Abca1 Itri3:176088353-176088853			Promoter	Yes
Itri3:176088913-176089413	TSS	Abca1	Abca1 Itri3:176088913-176089413	0.402868	1.32513e-19	Promoter	Yes
Itri3:176089476-176089976	TSS	Abca1	Abca1 Itri3:176089476-176089976			PEs	No
Itri10:43620191-43620691	TSS	Abcb7	Abcb7 Itri10:43620191-43620691			Other	No
Itri10:43620892-43621392	TSS	Abcb7	Abcb7 Itri10:43620892-43621392			Promoter	Yes
Itri3:101167764-101168264	TSS	Abcg4	Abcg4 Itri3:101167764-101168264	0.704087	1.66179e-73	Other	No
Itri3:101168290-101168790	TSS	Abcg4	Abcg4 Itri3:101168290-101168790	0.68324	1.41431e-67	PEs	No
Itri3:101168878-101169378	TSS	Abcg4	Abcg4 Itri3:101168878-101169378	0.784899	1.6627e-102	Promoter	Yes
Itri3:101169769-101170269	TSS	Abcg4	Abcg4 Itri3:101169769-101170269	0.775632	1.42943e-98	Promoter	Yes
Itri9:131099559-131100059	TSS	Abhd11	Abhd11 Itri9:131099559-131100059			Other	No
Itri9:131100157-131100657	TSS	Abhd11	Abhd11 Itri9:131100157-131100657	0.721712	6.086e-79	Promoter	Yes
Itri9:131100870-131101370	TSS	Abhd11	Abhd11 Itri9:131100870-131101370	0.266645	1.07059e-08	Promoter	Yes
Itri9:131101597-131102097	TSS	Abhd11	Abhd11 Itri9:131101597-131102097			Other	No
Itri2:169592915-169593415	TSS	Abhd6	Abhd6 Itri2:169592915-169593415	0.521461	1.80708e-34	Promoter	No
Itri2:169593762-169594262	TSS	Abhd6	Abhd6 Itri2:169593762-169594262	0.50434	6.10545e-32	Promoter	Yes
Itri2:169594270-169594770	TSS	Abhd6	Abhd6 Itri2:169594270-169594770			Promoter	No
Itri7:43795521-43796021	TSS	ABR	ABR Itri7:43795521-43796021			Other	No
Itri7:43796136-43796636	TSS	ABR	ABR Itri7:43796136-43796636			Promoter	No
Itri7:43796736-43797236	TSS	ABR	ABR Itri7:43796736-43797236			Promoter	No
Itri7:43797488-43797988	TSS	ABR	ABR Itri7:43797488-43797988			Promoter	No
Itri6:189368805-189369305	TSS	Ackr3	Ackr3 Itri6:189368805-189369305	0.493	2.41647e-30	Promoter	Yes
Itri6:189369371-189369871	TSS	Ackr3	Ackr3 Itri6:189369371-189369871	0.274044	3.76261e-09	Promoter	Yes
Itri7:20275934-20276434	TSS	Acly	Acly Itri7:20275934-20276434			Promoter	Yes
Itri7:20276617-20277117	TSS	Acly	Acly Itri7:20276617-20277117	0.260482	2.49365e-08	Promoter	Yes
Itri7:20277389-20277889	TSS	Acly	Acly Itri7:20277389-20277889			Promoter	Yes
Itri5:81057956-81058456	TSS	Actc1	Actc1 Itri5:81057956-81058456			PEs	No
Itri5:81058493-81058993	TSS	Actc1	Actc1 Itri5:81058493-81058993	0.358166	2.14231e-15	Promoter	No
Itri5:81059186-81059686	TSS	Actc1	Actc1 Itri5:81059186-81059686	0.729127	2.34301e-81	PEs	Yes
Itri7:1237586-1238086	TSS	Actg1	Actg1 Itri7:1237586-1238086			Promoter	No
Itri7:1238760-1239260	TSS	Actg1	Actg1 Itri7:1238760-1239260			Promoter	No
Itri7:1239314-1239814	TSS	Actg1	Actg1 Itri7:1239314-1239814			Promoter	No
Itri8:139720670-139721170	TSS	ACTG1-like	ACTG1-like Itri8:139720670-139721170			Other	No
Itri9:133339001-133339501	TSS	Actl6b	Actl6b Itri9:133339001-133339501			AEs	No
Itri9:133339951-133340451	TSS	Actl6b	Actl6b Itri9:133339951-133340451	0.575828	1.51612e-43	Promoter	Yes
Itri9:133340790-133341290	TSS	Actl6b	Actl6b Itri9:133340790-133341290	0.35713	2.63353e-15	Promoter	No
Itri5:27857062-27857562	TSS	Acyp1	Acyp1 Itri5:27857062-27857562	0.287181	5.40604e-10	Promoter	No
Itri5:27858181-27858681	TSS	Acyp1	Acyp1 Itri5:27858181-27858681			PEs	No
Itri1:140992649-140993149	TSS	Adamts19	Adamts19 Itri1:140992649-140993149	0.438715	1.73427e-23	PEs	Yes
Itri1:140993286-140993786	TSS	Adamts19	Adamts19 Itri1:140993286-140993786	0.642167	3.07949e-57	Promoter	No
Itri1:140994413-140994913	TSS	Adamts19	Adamts19 Itri1:140994413-140994913	0.304233	3.70424e-11	Promoter	Yes
Itri14:14227269-14227769	TSS	Adamts3	Adamts3 Itri14:14227269-14227769	0.291652	2.72539e-10	Promoter	Yes
Itri14:14227905-14228405	TSS	Adamts3	Adamts3 Itri14:14227905-14228405	0.747937	7.2967e-88	Promoter	Yes
Itri14:14228446-14228946	TSS	Adamts3	Adamts3 Itri14:14228446-14228946	0.311424	1.13058e-11	Promoter	Yes
Itri14:14229102-14229602	TSS	Adamts3	Adamts3 Itri14:14229102-14229602	0.737104	4.77628e-84	Promoter	Yes
Itri1:194861453-194861953	TSS	Adamts6	Adamts6 Itri1:194861453-194861953			Other	No
Itri1:194738461-194738961	TSS	ADAMTS6	ADAMTS6 Itri1:194738461-194738961	0.43553	4.01388e-23	Promoter	No
Itri1:194739315-194739815	TSS	ADAMTS6	ADAMTS6 Itri1:194739315-194739815	0.609988	3.44978e-50	Promoter	Yes
Itri1:194739848-194740348	TSS	ADAMTS6	ADAMTS6 Itri1:194739848-194740348	0.600903	2.41673e-48	Promoter	No
Itri1:194740489-194740989	TSS	ADAMTS6	ADAMTS6 Itri1:194740489-194740989	0.43023	1.59068e-22	Promoter	Yes
Itri18:37991579-37992079	TSS	Adarb1	Adarb1 Itri18:37991579-37992079			Other	No
Itri18:37992916-37993416	TSS	Adarb1	Adarb1 Itri18:37992916-37993416			Other	No
Itri17:50202261-50202761	TSS	Adgra2	Adgra2 Itri17:50202261-50202761			Promoter	Yes
Itri17:50203008-50203508	TSS	Adgra2	Adgra2 Itri17:50203008-50203508	0.344758	2.9259e-14	Promoter	Yes
Itri17:50203553-50204053	TSS	Adgra2	Adgra2 Itri17:50203553-50204053	0.373174	9.81479e-17	Promoter	Yes
Itri1:173972199-173972699	TSS	Adgrv1	Adgrv1 Itri1:173972199-173972699	0.438719	1.73262e-23	Promoter	No
Itri1:173972822-173973322	TSS	Adgrv1	Adgrv1 Itri1:173972822-173973322	0.648559	9.6601e-59	Promoter	Yes
Itri1:173973547-173974047	TSS	Adgrv1	Adgrv1 Itri1:173973547-173974047			PEs	No
Itri12:46938174-46938674	TSS	Adi1	Adi1 Itri12:46938174-46938674			Other	No
Itri12:46938677-46939177	TSS	Adi1	Adi1 Itri12:46938677-46939177			Promoter	No
Itri5:188401320-188401820	TSS	Adnp	Adnp Itri5:188401320-188401820			Promoter	No
Itri5:188402013-188402513	TSS	Adnp	Adnp Itri5:188402013-188402513			PEs	No
Itri2:216080427-216080927	TSS	Aes	Aes Itri2:216080427-216080927	0.530637	6.92812e-36	AEs	No
Itri2:216081021-216081521	TSS	Aes	Aes Itri2:216081021-216081521	0.421115	1.60377e-21	Promoter	No
Itri10:114719838-114720338	TSS	Aff2	Aff2 Itri10:114719838-114720338			Promoter	No
Itri10:114721238-114721738	TSS	Aff2	Aff2 Itri10:114721238-114721738			Promoter	Yes
Itri1:115238454-115238954	TSS	Aff4	Aff4 Itri1:115238454-115238954			Other	No
Itri1:115239033-115239533	TSS	Aff4	Aff4 Itri1:115239033-115239533			Promoter	No
Itri1:115239566-115240066	TSS	Aff4	Aff4 Itri1:115239566-115240066	0.382933	1.20653e-17	Promoter	Yes
Itri1:115240655-115241155	TSS	Aff4	Aff4 Itri1:115240655-115241155			Promoter	Yes
Itri17:27446274-27446774	TSS	Aga	Aga Itri17:27446274-27446774			PEs	No
Itri17:27446812-27447312	TSS	Aga	Aga Itri17:27446812-27447312			Promoter	No
Itri17:27447404-27447904	TSS	Aga	Aga Itri17:27447404-27447904			Promoter	Yes
Itri17:27448084-27448584	TSS	Aga	Aga Itri17:27448084-27448584			PEs	No
Itri6:188689814-188690314	TSS	Agap1	Agap1 Itri6:188689814-188690314			Promoter	Yes
Itri6:188690473-188690973	TSS	Agap1	Agap1 Itri6:188690473-188690973	0.450569	7.02414e-25	Promoter	Yes
Itri12:65350033-65350533	TSS	Agbl5	Agbl5 Itri12:65350033-65350533			Promoter	Yes
Itri12:65350854-65351354	TSS	Agbl5	Agbl5 Itri12:65350854-65351354	0.282474	1.09714e-09	Promoter	Yes
Itri12:65351470-65351970	TSS	Agbl5	Agbl5 Itri12:65351470-65351970			Promoter	Yes
Itri6:138187656-138188156	TSS	Agps	Agps Itri6:138187656-138188156			PEs	No
Itri6:138188745-138189245	TSS	Agps	Agps Itri6:138188745-138189245	-0.367983	2.90655e-16	Promoter	Yes
Itri6:138189428-138189928	TSS	Agps	Agps Itri6:138189428-138189928			Promoter	No
Itri8:123277275-123277775	TSS	Ahi1	Ahi1 Itri8:123277275-123277775			Promoter	No
Itri8:123277875-123278375	TSS	Ahi1	Ahi1 Itri8:123277875-123278375	0.565683	1.01022e-41	Promoter	Yes
Itri8:123278574-123279074	TSS	Ahi1	Ahi1 Itri8:123278574-123279074			Promoter	No
Itri5:25789592-25790092	TSS	Ahsa1	Ahsa1 Itri5:25789592-25790092			Promoter	Yes
Itri5:25790495-25790995	TSS	Ahsa1	Ahsa1 Itri5:25790495-25790995			Promoter	Yes
Itri5:25791141-25791641	TSS	Ahsa1	Ahsa1 Itri5:25791141-25791641			Promoter	Yes
Itri5:25791793-25792293	TSS	Ahsa1	Ahsa1 Itri5:25791793-25792293			Promoter	Yes
Itri8:129606486-129606986	TSS	Aig1	Aig1 Itri8:129606486-129606986			Other	No
Itri8:129607347-129607847	TSS	Aig1	Aig1 Itri8:129607347-129607847	0.832702	1.93632e-126	Promoter	Yes
Itri8:129607850-129608350	TSS	Aig1	Aig1 Itri8:129607850-129608350	0.590569	2.58171e-46	Promoter	Yes
Itri3:195748038-195748538	TSS	Ak1	Ak1 Itri3:195748038-195748538			PEs	No
Itri3:195748590-195749090	TSS	Ak1	Ak1 Itri3:195748590-195749090			Promoter	Yes
Itri3:195749860-195750360	TSS	Ak1	Ak1 Itri3:195749860-195750360			AEs	No
Itri2:30993077-30993577	TSS	Akap9	Akap9 Itri2:30993077-30993577			PEs	No
Itri2:30994002-30994502	TSS	Akap9	Akap9 Itri2:30994002-30994502	0.553195	1.46246e-39	Promoter	Yes
Itri2:30994775-30995275	TSS	Akap9	Akap9 Itri2:30994775-30995275			Promoter	Yes
Itri11:55149366-55149866	TSS	Akirin1	Akirin1 Itri11:55149366-55149866			Other	No
Itri11:55149867-55150367	TSS	Akirin1	Akirin1 Itri11:55149867-55150367			Promoter	Yes
Itri11:55150431-55150931	TSS	Akirin1	Akirin1 Itri11:55150431-55150931			Promoter	Yes
Itri11:55151225-55151725	TSS	Akirin1	Akirin1 Itri11:55151225-55151725			Promoter	Yes
Itri5:131703436-131703936	TSS	AKIRIN1-containing	AKIRIN1-containing Itri5:131703436-131703936	0.369142	2.28455e-16	PEs	No
Itri5:131704360-131704860	TSS	AKIRIN1-containing	AKIRIN1-containing Itri5:131704360-131704860	0.443185	5.25361e-24	PEs	No
Itri3:183894771-183895271	TSS	Akna	Akna Itri3:183894771-183895271			PEs	No
Itri3:183895421-183895921	TSS	Akna	Akna Itri3:183895421-183895921			PEs	No
Itri3:183896102-183896602	TSS	Akna	Akna Itri3:183896102-183896602	0.564906	1.38567e-41	PEs	No
Itri3:183897044-183897544	TSS	Akna	Akna Itri3:183897044-183897544	0.525136	4.95296e-35	Promoter	Yes
Itri5:1790621-1791121	TSS	Akt1	Akt1 Itri5:1790621-1791121			Other	No
Itri5:1791627-1792127	TSS	Akt1	Akt1 Itri5:1791627-1792127			Other	No
Itri2:155115585-155116085	TSS	Aldh2	Aldh2 Itri2:155115585-155116085	0.363204	7.75541e-16	Promoter	No
Itri2:155116101-155116601	TSS	Aldh2	Aldh2 Itri2:155116101-155116601			Promoter	No
Itri2:155116642-155117142	TSS	Aldh2	Aldh2 Itri2:155116642-155117142	0.415594	6.2842e-21	Promoter	Yes
Itri2:155117168-155117668	TSS	Aldh2	Aldh2 Itri2:155117168-155117668			Other	No
Itri9:101783669-101784169	TSS	Aldh9a1	Aldh9a1 Itri9:101783669-101784169	-0.373982	8.27407e-17	Promoter	No
Itri9:101784285-101784785	TSS	Aldh9a1	Aldh9a1 Itri9:101784285-101784785			PEs	No
Itri7:41923482-41923982	TSS	Aldoc	Aldoc Itri7:41923482-41923982	0.589871	3.51926e-46	Promoter	Yes
Itri7:41924031-41924531	TSS	Aldoc	Aldoc Itri7:41924031-41924531	0.454403	2.42421e-25	Promoter	No
Itri7:41924670-41925170	TSS	Aldoc	Aldoc Itri7:41924670-41925170	0.451701	5.13762e-25	Promoter	Yes
Itri4:843155-843655	TSS	Alg12	Alg12 Itri4:843155-843655			Promoter	Yes
Itri4:843854-844354	TSS	Alg12	Alg12 Itri4:843854-844354	0.537758	5.12299e-37	Promoter	Yes
Itri4:844388-844888	TSS	Alg12	Alg12 Itri4:844388-844888	0.260359	2.53549e-08	Promoter	No
Itri10:84028237-84028737	TSS	Alg13	Alg13 Itri10:84028237-84028737			Promoter	Yes
Itri10:84029006-84029506	TSS	Alg13	Alg13 Itri10:84029006-84029506			Promoter	No
Itri3:94150405-94150905	TSS	Alg9	Alg9 Itri3:94150405-94150905			Other	No
Itri3:94150978-94151478	TSS	Alg9	Alg9 Itri3:94150978-94151478	0.253012	6.73833e-08	Promoter	No
Itri3:94151504-94152004	TSS	Alg9	Alg9 Itri3:94151504-94152004			Promoter	No
Itri3:94152019-94152519	TSS	Alg9	Alg9 Itri3:94152019-94152519			Promoter	No
Itri2:200975540-200976040	TSS	Als2cl	Als2cl Itri2:200975540-200976040			Other	Yes
Itri2:200976387-200976887	TSS	Als2cl	Als2cl Itri2:200976387-200976887	0.365726	4.63141e-16	Other	Yes
Itri3:79605004-79605504	TSS	Amotl1	Amotl1 Itri3:79605004-79605504			Other	No
Itri2:179357166-179357666	TSS	AMOTL1-containing	AMOTL1-containing Itri2:179357166-179357666			Promoter	No
Itri3:79731758-79732258	TSS	AMOTL1-like	AMOTL1-like Itri3:79731758-79732258	0.504607	5.59066e-32	Other	No
Itri3:79732930-79733430	TSS	AMOTL1-like	AMOTL1-like Itri3:79732930-79733430	0.631819	7.03562e-55	AEs	No
Itri2:94971395-94971895	TSS	Amph	Amph Itri2:94971395-94971895	0.359643	1.59335e-15	Promoter	No
Itri2:94971906-94972406	TSS	Amph	Amph Itri2:94971906-94972406	0.435108	4.48307e-23	Promoter	No
Itri1:58202992-58203492	TSS	Anapc16	Anapc16 Itri1:58202992-58203492			Promoter	Yes
Itri1:58203749-58204249	TSS	Anapc16	Anapc16 Itri1:58203749-58204249	-0.344239	3.22971e-14	Promoter	Yes
Itri1:58204351-58204851	TSS	Anapc16	Anapc16 Itri1:58204351-58204851			Promoter	Yes
Itri9:92200960-92201460	TSS	Angptl1	Angptl1 Itri9:92200960-92201460			PEs	No
Itri9:92201732-92202232	TSS	Angptl1	Angptl1 Itri9:92201732-92202232			AEs	Yes
Itri15:8388071-8388571	TSS	Ank2	Ank2 Itri15:8388071-8388571			Promoter	No
Itri15:8388582-8389082	TSS	Ank2	Ank2 Itri15:8388582-8389082			Promoter	Yes
Itri15:8389451-8389951	TSS	Ank2	Ank2 Itri15:8389451-8389951	-0.288014	4.76334e-10	Promoter	Yes
Itri15:8390008-8390508	TSS	Ank2	Ank2 Itri15:8390008-8390508			Promoter	No
Itri1:68578198-68578698	TSS	Ank3	Ank3 Itri1:68578198-68578698			AEs	Yes
Itri1:68578981-68579481	TSS	Ank3	Ank3 Itri1:68578981-68579481			Promoter	No
Itri1:68407453-68407953	TSS	ANK3	ANK3 Itri1:68407453-68407953			PEs	No
Itri1:68408354-68408854	TSS	ANK3	ANK3 Itri1:68408354-68408854			Promoter	Yes
Itri13:72258274-72258774	TSS	Ankrd12	Ankrd12 Itri13:72258274-72258774			Promoter	No
Itri13:72259044-72259544	TSS	Ankrd12	Ankrd12 Itri13:72259044-72259544			Promoter	Yes
Itri13:72260093-72260593	TSS	Ankrd12	Ankrd12 Itri13:72260093-72260593			Promoter	Yes
Itri2:175591634-175592134	TSS	Ankrd28	Ankrd28 Itri2:175591634-175592134			Promoter	Yes
Itri2:175592282-175592782	TSS	Ankrd28	Ankrd28 Itri2:175592282-175592782			Promoter	Yes
Itri2:175593209-175593709	TSS	Ankrd28	Ankrd28 Itri2:175593209-175593709	0.289311	3.90801e-10	Promoter	Yes
Itri15:64037262-64037762	TSS	Ankrd50	Ankrd50 Itri15:64037262-64037762			Promoter	No
Itri20:4544335-4544835	TSS	ANKRD50-containing	ANKRD50-containing Itri20:4544335-4544835	-0.297237	1.13791e-10	Promoter	Yes
Itri20:4544942-4545442	TSS	ANKRD50-containing	ANKRD50-containing Itri20:4544942-4545442			Other	No
Itri4:20741706-20742206	TSS	Anks1b	Anks1b Itri4:20741706-20742206			PEs	No
Itri4:20743226-20743726	TSS	Anks1b	Anks1b Itri4:20743226-20743726			Promoter	Yes
Itri4:20743755-20744255	TSS	Anks1b	Anks1b Itri4:20743755-20744255			Promoter	Yes
Itri3:41035113-41035613	TSS	Ano5	Ano5 Itri3:41035113-41035613	0.301863	5.43732e-11	Promoter	No
Itri10:5288961-5289461	TSS	AP1S2	AP1S2 Itri10:5288961-5289461			Promoter	Yes
Itri10:5289649-5290149	TSS	AP1S2	AP1S2 Itri10:5289649-5290149	-0.455885	1.60094e-25	Promoter	Yes
Itri10:5290185-5290685	TSS	AP1S2	AP1S2 Itri10:5290185-5290685			Promoter	Yes
Itri7:37069740-37070240	TSS	Ap2b1	Ap2b1 Itri7:37069740-37070240	-0.259789	2.73802e-08	Promoter	No
Itri7:37070368-37070868	TSS	Ap2b1	Ap2b1 Itri7:37070368-37070868			Promoter	No
Itri17:46567571-46568071	TSS	Ap3m2	Ap3m2 Itri17:46567571-46568071			PEs	No
Itri17:46568241-46568741	TSS	Ap3m2	Ap3m2 Itri17:46568241-46568741	0.480213	1.2965e-28	Promoter	No
Itri17:46568822-46569322	TSS	Ap3m2	Ap3m2 Itri17:46568822-46569322	0.338453	9.57551e-14	Promoter	Yes
Itri17:46569553-46570053	TSS	Ap3m2	Ap3m2 Itri17:46569553-46570053			Other	No
Itri1:128306378-128306878	TSS	Ap3s1	Ap3s1 Itri1:128306378-128306878			Promoter	Yes
Itri1:128307074-128307574	TSS	Ap3s1	Ap3s1 Itri1:128307074-128307574	0.281035	1.35814e-09	Promoter	No
Itri1:128307758-128308258	TSS	Ap3s1	Ap3s1 Itri1:128307758-128308258	0.43894	1.63433e-23	Promoter	Yes
Itri5:72328394-72328894	TSS	Ap5m1	Ap5m1 Itri5:72328394-72328894			Promoter	Yes
Itri5:72328899-72329399	TSS	Ap5m1	Ap5m1 Itri5:72328899-72329399			Promoter	Yes
Itri5:72329593-72330093	TSS	Ap5m1	Ap5m1 Itri5:72329593-72330093			Promoter	Yes
Itri4:21891408-21891908	TSS	Apaf1	Apaf1 Itri4:21891408-21891908			Promoter	Yes
Itri1:154711274-154711774	TSS	Apc	Apc Itri1:154711274-154711774			Promoter	No
Itri1:154711906-154712406	TSS	Apc	Apc Itri1:154711906-154712406	0.499116	3.3822e-31	Promoter	Yes
Itri1:154712605-154713105	TSS	Apc	Apc Itri1:154712605-154713105			Other	No
Itri13:2009225-2009725	TSS	Apcdd1	Apcdd1 Itri13:2009225-2009725			Other	No
Itri13:2009750-2010250	TSS	Apcdd1	Apcdd1 Itri13:2009750-2010250			Other	No
Itri7:64528538-64529038	TSS	Apeh	Apeh Itri7:64528538-64529038	0.337682	1.10479e-13	Promoter	Yes
Itri7:64529111-64529611	TSS	Apeh	Apeh Itri7:64529111-64529611			Promoter	Yes
Itri7:64529887-64530387	TSS	Apeh	Apeh Itri7:64529887-64530387			Promoter	Yes
Itri11:21524942-21525442	TSS	Aph1a	Aph1a Itri11:21524942-21525442	0.259275	2.93467e-08	Promoter	Yes
Itri11:21525473-21525973	TSS	Aph1a	Aph1a Itri11:21525473-21525973	-0.296815	1.21649e-10	Promoter	Yes
Itri11:21526170-21526670	TSS	Aph1a	Aph1a Itri11:21526170-21526670			Promoter	No
Itri5:105991107-105991607	TSS	Aph1b	Aph1b Itri5:105991107-105991607			Other	No
Itri5:105991751-105992251	TSS	Aph1b	Aph1b Itri5:105991751-105992251	0.319495	2.86557e-12	Promoter	Yes
Itri5:105992445-105992945	TSS	Aph1b	Aph1b Itri5:105992445-105992945			Promoter	Yes
Itri3:30090475-30090975	TSS	Apip	Apip Itri3:30090475-30090975			Promoter	Yes
Itri3:30091103-30091603	TSS	Apip	Apip Itri3:30091103-30091603			Promoter	Yes
Itri3:30091967-30092467	TSS	Apip	Apip Itri3:30091967-30092467	0.424186	7.42461e-22	Promoter	No
Itri5:2742160-2742660	TSS	Apopt1	Apopt1 Itri5:2742160-2742660			Promoter	No
Itri5:2742676-2743176	TSS	Apopt1	Apopt1 Itri5:2742676-2743176			Promoter	No
Itri10:33933713-33934213	TSS	AQP11-like	AQP11-like Itri10:33933713-33934213			Promoter	Yes
Itri5:81228302-81228802	TSS	Aqr	Aqr Itri5:81228302-81228802			PEs	No
Itri5:81229342-81229842	TSS	Aqr	Aqr Itri5:81229342-81229842			Promoter	Yes
Itri3:100684222-100684722	TSS	Arcn1	Arcn1 Itri3:100684222-100684722			Promoter	Yes
Itri3:100684741-100685241	TSS	Arcn1	Arcn1 Itri3:100684741-100685241			Promoter	No
Itri6:67976749-67977249	TSS	Arfgef1	Arfgef1 Itri6:67976749-67977249			Promoter	Yes
Itri6:67977251-67977751	TSS	Arfgef1	Arfgef1 Itri6:67977251-67977751			Promoter	Yes
Itri6:67978034-67978534	TSS	Arfgef1	Arfgef1 Itri6:67978034-67978534			Promoter	Yes
Itri6:67978636-67979136	TSS	Arfgef1	Arfgef1 Itri6:67978636-67979136			Promoter	No
Itri15:39859200-39859700	TSS	Arfip1	Arfip1 Itri15:39859200-39859700			Promoter	No
Itri15:39859713-39860213	TSS	Arfip1	Arfip1 Itri15:39859713-39860213			Promoter	No
Itri15:39860292-39860792	TSS	Arfip1	Arfip1 Itri15:39860292-39860792			Promoter	No
Itri15:39861012-39861512	TSS	Arfip1	Arfip1 Itri15:39861012-39861512			Promoter	No
Itri5:63186880-63187380	TSS	Arg2	Arg2 Itri5:63186880-63187380	0.373796	8.60665e-17	Promoter	Yes
Itri5:63187381-63187881	TSS	Arg2	Arg2 Itri5:63187381-63187881	0.825948	1.29068e-122	Promoter	Yes
Itri4:190845112-190845612	TSS	Arglu1	Arglu1 Itri4:190845112-190845612			Promoter	No
Itri4:190845617-190846117	TSS	Arglu1	Arglu1 Itri4:190845617-190846117			Promoter	Yes
Itri4:190846336-190846836	TSS	Arglu1	Arglu1 Itri4:190846336-190846836	-0.31298	8.70716e-12	Promoter	Yes
Itri4:190846928-190847428	TSS	Arglu1	Arglu1 Itri4:190846928-190847428			Promoter	No
Itri8:118350095-118350595	TSS	Arhgap18	Arhgap18 Itri8:118350095-118350595			AEs	Yes
Itri8:118350811-118351311	TSS	Arhgap18	Arhgap18 Itri8:118350811-118351311	0.306333	2.62813e-11	PEs	Yes
Itri8:118351381-118351881	TSS	Arhgap18	Arhgap18 Itri8:118351381-118351881			PEs	No
Itri8:118351906-118352406	TSS	Arhgap18	Arhgap18 Itri8:118351906-118352406			PEs	No
Itri11:38538318-38538818	TSS	Arhgef10l	Arhgef10l Itri11:38538318-38538818			AEs	No
Itri11:38538921-38539421	TSS	Arhgef10l	Arhgef10l Itri11:38538921-38539421	0.624245	3.2985e-53	AEs	No
Itri11:38539489-38539989	TSS	Arhgef10l	Arhgef10l Itri11:38539489-38539989			AEs	No
Itri11:38540566-38541066	TSS	Arhgef10l	Arhgef10l Itri11:38540566-38541066			AEs	No
Itri2:213333501-213334001	TSS	ARHGEF18	ARHGEF18 Itri2:213333501-213334001			Other	No
Itri2:213334631-213335131	TSS	ARHGEF18	ARHGEF18 Itri2:213334631-213335131			Other	No
Itri2:213335317-213335817	TSS	ARHGEF18	ARHGEF18 Itri2:213335317-213335817			Other	No
Itri2:213311158-213311658	TSS	ARHGEF18-like	ARHGEF18-like Itri2:213311158-213311658			PEs	No
Itri2:213311666-213312166	TSS	ARHGEF18-like	ARHGEF18-like Itri2:213311666-213312166			Promoter	No
Itri2:213312259-213312759	TSS	ARHGEF18-like	ARHGEF18-like Itri2:213312259-213312759	0.33421	2.09262e-13	Promoter	Yes
Itri2:213312811-213313311	TSS	ARHGEF18-like	ARHGEF18-like Itri2:213312811-213313311			Promoter	No
Itri7:87891490-87891990	TSS	Arhgef26	Arhgef26 Itri7:87891490-87891990			Promoter	No
Itri7:87892359-87892859	TSS	Arhgef26	Arhgef26 Itri7:87892359-87892859			Promoter	Yes
Itri7:87892972-87893472	TSS	Arhgef26	Arhgef26 Itri7:87892972-87893472			Promoter	Yes
Itri4:194095650-194096150	TSS	Arhgef7	Arhgef7 Itri4:194095650-194096150			Other	No
Itri7:155399339-155399839	TSS	Arl13b	Arl13b Itri7:155399339-155399839			Promoter	No
Itri7:155399864-155400364	TSS	Arl13b	Arl13b Itri7:155399864-155400364			Promoter	Yes
Itri3:34202836-34203336	TSS	Arl14ep	Arl14ep Itri3:34202836-34203336			Promoter	No
Itri3:34203686-34204186	TSS	Arl14ep	Arl14ep Itri3:34203686-34204186			Promoter	Yes
Itri3:34204217-34204717	TSS	Arl14ep	Arl14ep Itri3:34204217-34204717			Promoter	No
Itri3:34204736-34205236	TSS	Arl14ep	Arl14ep Itri3:34204736-34205236			PEs	No
Itri7:1125518-1126018	TSS	Arl16	Arl16 Itri7:1125518-1126018			Promoter	No
Itri7:1126030-1126530	TSS	Arl16	Arl16 Itri7:1126030-1126530			Promoter	Yes
Itri7:1126799-1127299	TSS	Arl16	Arl16 Itri7:1126799-1127299			Promoter	Yes
Itri7:1127456-1127956	TSS	Arl16	Arl16 Itri7:1127456-1127956			Other	No
Itri3:7899298-7899798	TSS	Arl2	Arl2 Itri3:7899298-7899798	0.595466	2.87853e-47	Promoter	Yes
Itri3:7899868-7900368	TSS	Arl2	Arl2 Itri3:7899868-7900368	0.659646	1.94961e-61	Promoter	Yes
Itri3:7900564-7901064	TSS	Arl2	Arl2 Itri3:7900564-7901064			Promoter	No
Itri1:31586234-31586734	TSS	Arl3	Arl3 Itri1:31586234-31586734	0.35073	9.27838e-15	Promoter	Yes
Itri1:31586771-31587271	TSS	Arl3	Arl3 Itri1:31586771-31587271	0.861567	6.26796e-145	Promoter	Yes
Itri1:31587288-31587788	TSS	Arl3	Arl3 Itri1:31587288-31587788	0.619036	4.35454e-52	Promoter	Yes
Itri6:187884105-187884605	TSS	Arl4c	Arl4c Itri6:187884105-187884605	0.53537	1.23568e-36	Promoter	Yes
Itri10:62851837-62852337	TSS	Armcx3	Armcx3 Itri10:62851837-62852337			Promoter	Yes
Itri10:62852474-62852974	TSS	Armcx3	Armcx3 Itri10:62852474-62852974			Promoter	Yes
Itri10:47445723-47446223	TSS	Arr3	Arr3 Itri10:47445723-47446223	0.902282	1.09052e-179	Other	Yes
Itri10:47446832-47447332	TSS	Arr3	Arr3 Itri10:47446832-47447332	0.882086	7.66091e-161	Other	No
Itri6:10913117-10913617	TSS	Asap1	Asap1 Itri6:10913117-10913617			PEs	No
Itri21:667094-667594	TSS	Asmt	Asmt Itri21:667094-667594			Other	No
Itri21:667786-668286	TSS	Asmt	Asmt Itri21:667786-668286			Other	No
Itri21:668798-669298	TSS	Asmt	Asmt Itri21:668798-669298			Other	No
Itri9:124463452-124463952	TSS	Asphd1	Asphd1 Itri9:124463452-124463952	0.757293	2.56377e-91	Promoter	Yes
Itri9:124463953-124464453	TSS	Asphd1	Asphd1 Itri9:124463953-124464453	0.916721	7.16027e-196	Promoter	Yes
Itri9:124464707-124465207	TSS	Asphd1	Asphd1 Itri9:124464707-124465207	0.874497	1.26165e-154	Promoter	Yes
Itri4:93298220-93298720	TSS	Atf7ip	Atf7ip Itri4:93298220-93298720			Promoter	Yes
Itri4:93298936-93299436	TSS	Atf7ip	Atf7ip Itri4:93298936-93299436			Promoter	Yes
Itri4:93299759-93300259	TSS	Atf7ip	Atf7ip Itri4:93299759-93300259			Other	No
Itri1:112512297-112512797	TSS	Atox1	Atox1 Itri1:112512297-112512797			Promoter	No
Itri1:112512800-112513300	TSS	Atox1	Atox1 Itri1:112512800-112513300	-0.550643	3.93574e-39	Promoter	Yes
Itri1:112513321-112513821	TSS	Atox1	Atox1 Itri1:112513321-112513821			Promoter	No
Itri1:112514001-112514501	TSS	Atox1	Atox1 Itri1:112514001-112514501			Promoter	No
Itri4:195201042-195201542	TSS	Atp11a	Atp11a Itri4:195201042-195201542	0.435236	4.33515e-23	Other	No
Itri4:195201798-195202298	TSS	Atp11a	Atp11a Itri4:195201798-195202298			PEs	No
Itri4:195202539-195203039	TSS	Atp11a	Atp11a Itri4:195202539-195203039	0.323676	1.38292e-12	AEs	No
Itri4:29603295-29603795	TSS	Atp2b1	Atp2b1 Itri4:29603295-29603795	0.577357	7.94556e-44	Promoter	No
Itri4:29603862-29604362	TSS	Atp2b1	Atp2b1 Itri4:29603862-29604362	0.791517	1.94428e-105	Promoter	Yes
Itri4:29605190-29605690	TSS	Atp2b1	Atp2b1 Itri4:29605190-29605690	0.560128	9.48417e-41	Promoter	Yes
Itri5:181793149-181793649	TSS	Atp5e	Atp5e Itri5:181793149-181793649			Promoter	Yes
Itri7:24522334-24522834	TSS	Atp5g1	Atp5g1 Itri7:24522334-24522834			Promoter	No
Itri7:24522995-24523495	TSS	Atp5g1	Atp5g1 Itri7:24522995-24523495	0.77683	4.54912e-99	Promoter	No
Itri7:24523544-24524044	TSS	Atp5g1	Atp5g1 Itri7:24523544-24524044	0.499217	3.27374e-31	Promoter	No
Itri4:62245698-62246198	TSS	Atp5g2	Atp5g2 Itri4:62245698-62246198			Promoter	No
Itri4:62246301-62246801	TSS	Atp5g2	Atp5g2 Itri4:62246301-62246801	-0.683346	1.32323e-67	Promoter	Yes
Itri4:62247335-62247835	TSS	Atp5g2	Atp5g2 Itri4:62247335-62247835	-0.611975	1.33758e-50	Promoter	Yes
Itri6:136284476-136284976	TSS	Atp5g3	Atp5g3 Itri6:136284476-136284976	0.541944	1.07807e-37	Promoter	Yes
Itri6:136285212-136285712	TSS	Atp5g3	Atp5g3 Itri6:136285212-136285712	0.499535	2.95167e-31	Promoter	Yes
Itri3:100531453-100531953	TSS	Atp5l	Atp5l Itri3:100531453-100531953			Promoter	No
Itri3:100531958-100532458	TSS	Atp5l	Atp5l Itri3:100531958-100532458	0.406862	5.16548e-20	Promoter	Yes
Itri9:105166292-105166792	TSS	Atp6v0c	Atp6v0c Itri9:105166292-105166792			Promoter	No
Itri9:105166886-105167386	TSS	Atp6v0c	Atp6v0c Itri9:105166886-105167386	0.683666	1.08246e-67	Promoter	Yes
Itri9:105167418-105167918	TSS	Atp6v0c	Atp6v0c Itri9:105167418-105167918	0.304885	3.331e-11	Promoter	Yes
Itri9:105168144-105168644	TSS	Atp6v0c	Atp6v0c Itri9:105168144-105168644			Promoter	No
Itri3:184032619-184033119	TSS	Atp6v1g1	Atp6v1g1 Itri3:184032619-184033119			AEs	No
Itri3:184033386-184033886	TSS	Atp6v1g1	Atp6v1g1 Itri3:184033386-184033886	0.466692	7.27912e-27	Promoter	Yes
Itri3:184034389-184034889	TSS	Atp6v1g1	Atp6v1g1 Itri3:184034389-184034889			Promoter	No
Itri13:15525579-15526079	TSS	Atp9b	Atp9b Itri13:15525579-15526079			Other	No
Itri10:42228441-42228941	TSS	Atrx	Atrx Itri10:42228441-42228941			Other	No
Itri10:42229010-42229510	TSS	Atrx	Atrx Itri10:42229010-42229510			Promoter	Yes
Itri10:42229735-42230235	TSS	Atrx	Atrx Itri10:42229735-42230235			Promoter	Yes
Itri9:123779220-123779720	TSS	Atxn2l	Atxn2l Itri9:123779220-123779720			Promoter	Yes
Itri5:13118893-13119393	TSS	Atxn3	Atxn3 Itri5:13118893-13119393			Other	No
Itri5:13119511-13120011	TSS	Atxn3	Atxn3 Itri5:13119511-13120011	-0.408148	3.80211e-20	Promoter	Yes
Itri5:13120037-13120537	TSS	Atxn3	Atxn3 Itri5:13120037-13120537			Promoter	Yes
Itri11:27688248-27688748	TSS	Aurkaip1	Aurkaip1 Itri11:27688248-27688748			Promoter	Yes
Itri11:27688821-27689321	TSS	Aurkaip1	Aurkaip1 Itri11:27688821-27689321			Promoter	No
Itri11:27689345-27689845	TSS	Aurkaip1	Aurkaip1 Itri11:27689345-27689845	0.47422	7.90481e-28	Promoter	No
Itri11:27690051-27690551	TSS	Aurkaip1	Aurkaip1 Itri11:27690051-27690551			Promoter	No
Itri9:80710442-80710942	TSS	B3galt2	B3galt2 Itri9:80710442-80710942			AEs	No
Itri9:80711452-80711952	TSS	B3galt2	B3galt2 Itri9:80711452-80711952			Promoter	Yes
Itri3:10522178-10522678	TSS	B3gat3	B3gat3 Itri3:10522178-10522678	0.265458	1.26209e-08	Other	No
Itri3:10522770-10523270	TSS	B3gat3	B3gat3 Itri3:10522770-10523270	0.73423	4.5615e-83	Promoter	Yes
Itri3:10523358-10523858	TSS	B3gat3	B3gat3 Itri3:10523358-10523858	0.642427	2.68e-57	Promoter	Yes
Itri3:10523955-10524455	TSS	B3gat3	B3gat3 Itri3:10523955-10524455	0.683701	1.05879e-67	Promoter	No
Itri3:247926-248426	TSS	B4galnt4	B4galnt4 Itri3:247926-248426	0.368489	2.61683e-16	Promoter	No
Itri3:248563-249063	TSS	B4galnt4	B4galnt4 Itri3:248563-249063			Other	No
Itri11:59472927-59473427	TSS	B4galt2	B4galt2 Itri11:59472927-59473427			Promoter	No
Itri11:59474396-59474896	TSS	B4galt2	B4galt2 Itri11:59474396-59474896			Promoter	Yes
Itri11:59474937-59475437	TSS	B4galt2	B4galt2 Itri11:59474937-59475437			Promoter	No
Itri18:35016927-35017427	TSS	Bace2	Bace2 Itri18:35016927-35017427			PEs	No
Itri18:35018324-35018824	TSS	Bace2	Bace2 Itri18:35018324-35018824			Promoter	Yes
Itri3:8481087-8481587	TSS	Bad	Bad Itri3:8481087-8481587			Promoter	Yes
Itri3:8481752-8482252	TSS	Bad	Bad Itri3:8481752-8482252	0.383167	1.14646e-17	Promoter	Yes
Itri3:8482465-8482965	TSS	Bad	Bad Itri3:8482465-8482965	0.505807	3.75787e-32	Promoter	Yes
Itri3:8482996-8483496	TSS	Bad	Bad Itri3:8482996-8483496			Promoter	No
Itri3:165255974-165256474	TSS	Bag1	Bag1 Itri3:165255974-165256474			Promoter	No
Itri3:165256484-165256984	TSS	Bag1	Bag1 Itri3:165256484-165256984			Promoter	Yes
Itri3:165257660-165258160	TSS	Bag1	Bag1 Itri3:165257660-165258160			Promoter	No
Itri1:16574441-16574941	TSS	Bag3	Bag3 Itri1:16574441-16574941	0.362191	9.52627e-16	Promoter	Yes
Itri1:16575238-16575738	TSS	Bag3	Bag3 Itri1:16575238-16575738	0.801321	5.55272e-110	Promoter	Yes
Itri4:57920345-57920845	TSS	Baz2a	Baz2a Itri4:57920345-57920845			Promoter	Yes
Itri4:57920885-57921385	TSS	Baz2a	Baz2a Itri4:57920885-57921385			Promoter	Yes
Itri4:57921604-57922104	TSS	Baz2a	Baz2a Itri4:57921604-57922104			Promoter	No
Itri15:65296088-65296588	TSS	Bbs12	Bbs12 Itri15:65296088-65296588			PEs	No
Itri15:65297083-65297583	TSS	Bbs12	Bbs12 Itri15:65297083-65297583	-0.369392	2.16792e-16	Promoter	Yes
Itri15:65297673-65298173	TSS	Bbs12	Bbs12 Itri15:65297673-65298173			Promoter	No
Itri2:55418180-55418680	TSS	Bcap29	Bcap29 Itri2:55418180-55418680	0.36254	8.87532e-16	Promoter	Yes
Itri10:118875794-118876294	TSS	Bcap31	Bcap31 Itri10:118875794-118876294			Promoter	No
Itri10:118876302-118876802	TSS	Bcap31	Bcap31 Itri10:118876302-118876802			Promoter	No
Itri10:118877042-118877542	TSS	Bcap31	Bcap31 Itri10:118877042-118877542			Promoter	No
Itri10:118877628-118878128	TSS	Bcap31	Bcap31 Itri10:118877628-118878128			Promoter	Yes
Itri9:125179424-125179924	TSS	Bcl7c	Bcl7c Itri9:125179424-125179924			Promoter	No
Itri1:185914692-185915192	TSS	Bdp1	Bdp1 Itri1:185914692-185915192			Other	No
Itri1:185915599-185916099	TSS	Bdp1	Bdp1 Itri1:185915599-185916099	0.38228	1.39148e-17	Promoter	Yes
Itri1:185916129-185916629	TSS	Bdp1	Bdp1 Itri1:185916129-185916629			Promoter	Yes
Itri1:185916785-185917285	TSS	Bdp1	Bdp1 Itri1:185916785-185917285			Promoter	No
Itri11:63821788-63822288	TSS	Bend5	Bend5 Itri11:63821788-63822288			Promoter	Yes
Itri11:63822296-63822796	TSS	Bend5	Bend5 Itri11:63822296-63822796			Promoter	Yes
Itri11:63822836-63823336	TSS	Bend5	Bend5 Itri11:63822836-63823336	-0.260161	2.60392e-08	Promoter	Yes
Itri10:61763650-61764150	TSS	BEX1	BEX1 Itri10:61763650-61764150	0.77123	9.11064e-97	Promoter	No
Itri10:61764600-61765100	TSS	BEX1	BEX1 Itri10:61764600-61765100			Promoter	No
Itri10:61623496-61623996	TSS	BEX2	BEX2 Itri10:61623496-61623996			Promoter	No
Itri13:8117931-8118431	TSS	Bicd2	Bicd2 Itri13:8117931-8118431			Promoter	Yes
Itri13:8118490-8118990	TSS	Bicd2	Bicd2 Itri13:8118490-8118990			Promoter	No
Itri13:8119062-8119562	TSS	Bicd2	Bicd2 Itri13:8119062-8119562	0.311125	1.18842e-11	Promoter	Yes
Itri13:8119724-8120224	TSS	Bicd2	Bicd2 Itri13:8119724-8120224			Promoter	No
Itri5:175012848-175013348	TSS	Blcap	Blcap Itri5:175012848-175013348			Promoter	Yes
Itri5:175013537-175014037	TSS	Blcap	Blcap Itri5:175013537-175014037	0.304373	3.62115e-11	Promoter	No
Itri5:175014074-175014574	TSS	Blcap	Blcap Itri5:175014074-175014574	0.55153	2.79279e-39	Promoter	No
Itri5:175014648-175015148	TSS	Blcap	Blcap Itri5:175014648-175015148			Promoter	No
Itri4:58682917-58683417	TSS	Bloc1s1	Bloc1s1 Itri4:58682917-58683417			Promoter	Yes
Itri4:58683538-58684038	TSS	Bloc1s1	Bloc1s1 Itri4:58683538-58684038	-0.344705	2.95539e-14	Promoter	Yes
Itri4:58684103-58684603	TSS	Bloc1s1	Bloc1s1 Itri4:58684103-58684603	-0.349382	1.20504e-14	Promoter	Yes
Itri6:159572043-159572543	TSS	Bmpr2	Bmpr2 Itri6:159572043-159572543	0.263527	1.64711e-08	Promoter	Yes
Itri6:159573554-159574054	TSS	Bmpr2	Bmpr2 Itri6:159573554-159574054			Promoter	Yes
Itri6:159571485-159571985	TSS	BMPR2-like	BMPR2-like Itri6:159571485-159571985			Promoter	No
Itri6:159572043-159572543	TSS	BMPR2-like	BMPR2-like Itri6:159572043-159572543			Promoter	Yes
Itri4:95177855-95178355	TSS	Borcs5	Borcs5 Itri4:95177855-95178355			Promoter	No
Itri4:95178386-95178886	TSS	Borcs5	Borcs5 Itri4:95178386-95178886			Promoter	No
Itri4:95178931-95179431	TSS	Borcs5	Borcs5 Itri4:95178931-95179431			Promoter	No
Itri10:119982429-119982929	TSS	Brcc3	Brcc3 Itri10:119982429-119982929	0.318411	3.45388e-12	Promoter	Yes
Itri10:119983024-119983524	TSS	Brcc3	Brcc3 Itri10:119983024-119983524			Promoter	Yes
Itri4:889944-890444	TSS	Brd1	Brd1 Itri4:889944-890444			Promoter	No
Itri4:890468-890968	TSS	Brd1	Brd1 Itri4:890468-890968			Promoter	No
Itri3:1052352-1052852	TSS	Brsk2	Brsk2 Itri3:1052352-1052852			AEs	No
Itri3:1053099-1053599	TSS	Brsk2	Brsk2 Itri3:1053099-1053599			Other	No
Itri3:1053983-1054483	TSS	Brsk2	Brsk2 Itri3:1053983-1054483			Other	No
Itri3:1054581-1055081	TSS	Brsk2	Brsk2 Itri3:1054581-1055081			Other	No
Itri5:159330681-159331181	TSS	Btbd3	Btbd3 Itri5:159330681-159331181			Promoter	Yes
Itri5:159331195-159331695	TSS	Btbd3	Btbd3 Itri5:159331195-159331695			Promoter	Yes
Itri5:159331718-159332218	TSS	Btbd3	Btbd3 Itri5:159331718-159332218			Promoter	No
Itri1:187785103-187785603	TSS	Btf3	Btf3 Itri1:187785103-187785603			Promoter	Yes
Itri1:187785701-187786201	TSS	Btf3	Btf3 Itri1:187785701-187786201			Promoter	Yes
Itri2:137430-137930	TSS	BTG1	BTG1 Itri2:137430-137930			Promoter	Yes
Itri11:77636833-77637333	TSS	Cachd1	Cachd1 Itri11:77636833-77637333	0.458204	8.3256e-26	Promoter	Yes
Itri11:77638260-77638760	TSS	Cachd1	Cachd1 Itri11:77638260-77638760	0.565691	1.00705e-41	Promoter	Yes
Itri4:107015749-107016249	TSS	Cacna1c	Cacna1c Itri4:107015749-107016249			Other	Yes
Itri4:109054229-109054729	TSS	CACNA1C-containing	CACNA1C-containing Itri4:109054229-109054729	0.51798	6.06198e-34	Promoter	No
Itri4:109054881-109055381	TSS	CACNA1C-containing	CACNA1C-containing Itri4:109054881-109055381			Other	No
Itri2:63824336-63824836	TSS	Cacna2d1	Cacna2d1 Itri2:63824336-63824836			Promoter	Yes
Itri2:63825109-63825609	TSS	Cacna2d1	Cacna2d1 Itri2:63825109-63825609			Promoter	Yes
Itri2:63825701-63826201	TSS	Cacna2d1	Cacna2d1 Itri2:63825701-63826201			Promoter	Yes
Itri2:63826445-63826945	TSS	Cacna2d1	Cacna2d1 Itri2:63826445-63826945	0.355769	3.45081e-15	Promoter	Yes
Itri11:5422007-5422507	TSS	Cadm3	Cadm3 Itri11:5422007-5422507			PEs	No
Itri11:5422799-5423299	TSS	Cadm3	Cadm3 Itri11:5422799-5423299	0.627784	5.54185e-54	Promoter	Yes
Itri11:5423378-5423878	TSS	Cadm3	Cadm3 Itri11:5423378-5423878			Promoter	Yes
Itri2:165154268-165154768	TSS	Cadps	Cadps Itri2:165154268-165154768			PEs	Yes
Itri2:165155084-165155584	TSS	Cadps	Cadps Itri2:165155084-165155584	0.866082	3.3913e-148	Promoter	Yes
Itri16:37215698-37216198	TSS	Calb2	Calb2 Itri16:37215698-37216198			Other	No
Itri16:37216274-37216774	TSS	Calb2	Calb2 Itri16:37216274-37216774			PEs	No
Itri16:37216891-37217391	TSS	Calb2	Calb2 Itri16:37216891-37217391	0.254197	5.7675e-08	Promoter	Yes
Itri7:24465614-24466114	TSS	Calcoco2	Calcoco2 Itri7:24465614-24466114			Promoter	No
Itri7:24466185-24466685	TSS	Calcoco2	Calcoco2 Itri7:24466185-24466685			Promoter	No
Itri11:40643428-40643928	TSS	Camk2n1	Camk2n1 Itri11:40643428-40643928	0.605557	2.78487e-49	Promoter	No
Itri11:40644257-40644757	TSS	Camk2n1	Camk2n1 Itri11:40644257-40644757			AEs	No
Itri1:155994927-155995427	TSS	Camk4	Camk4 Itri1:155994927-155995427			Promoter	Yes
Itri1:155995624-155996124	TSS	Camk4	Camk4 Itri1:155995624-155996124			Promoter	Yes
Itri2:156449398-156449898	TSS	Camkk2	Camkk2 Itri2:156449398-156449898			Other	No
Itri2:156449997-156450497	TSS	Camkk2	Camkk2 Itri2:156449997-156450497			Other	No
Itri9:74355463-74355963	TSS	Camsap2	Camsap2 Itri9:74355463-74355963	0.356917	2.74766e-15	Promoter	Yes
Itri9:74356193-74356693	TSS	Camsap2	Camsap2 Itri9:74356193-74356693	0.521855	1.57413e-34	Promoter	Yes
Itri9:74357000-74357500	TSS	Camsap2	Camsap2 Itri9:74357000-74357500			PEs	Yes
Itri2:213172914-213173414	TSS	Camsap3	Camsap3 Itri2:213172914-213173414			Other	No
Itri2:213173603-213174103	TSS	Camsap3	Camsap3 Itri2:213173603-213174103	0.501723	1.44495e-31	Other	No
Itri2:213174545-213175045	TSS	Camsap3	Camsap3 Itri2:213174545-213175045			Other	No
Itri13:8251356-8251856	TSS	Card19	Card19 Itri13:8251356-8251856			Other	No
Itri13:8251881-8252381	TSS	Card19	Card19 Itri13:8251881-8252381	0.465252	1.10597e-26	Promoter	No
Itri13:8252438-8252938	TSS	Card19	Card19 Itri13:8252438-8252938	0.657424	6.9137e-61	Promoter	Yes
Itri13:8253015-8253515	TSS	Card19	Card19 Itri13:8253015-8253515			Promoter	No
Itri13:8253623-8254123	TSS	Card19	Card19 Itri13:8253623-8254123			Promoter	No
Itri1:186139591-186140091	TSS	Cartpt	Cartpt Itri1:186139591-186140091	0.858412	1.03883e-142	Promoter	Yes
Itri10:28439736-28440236	TSS	Cask	Cask Itri10:28439736-28440236			Promoter	Yes
Itri10:28440237-28440737	TSS	Cask	Cask Itri10:28440237-28440737			Promoter	Yes
Itri17:33537584-33538084	TSS	Casp3	Casp3 Itri17:33537584-33538084			Promoter	No
Itri17:33538137-33538637	TSS	Casp3	Casp3 Itri17:33538137-33538637			Promoter	Yes
Itri17:33538693-33539193	TSS	Casp3	Casp3 Itri17:33538693-33539193			Promoter	Yes
Itri17:33539689-33540189	TSS	Casp3	Casp3 Itri17:33539689-33540189			PEs	No
Itri1:168612075-168612575	TSS	Cast	Cast Itri1:168612075-168612575	0.785943	5.82851e-103	Promoter	Yes
Itri1:168612733-168613233	TSS	Cast	Cast Itri1:168612733-168613233	0.578331	5.2539e-44	Promoter	Yes
Itri1:168613425-168613925	TSS	Cast	Cast Itri1:168613425-168613925			PEs	No
Itri2:44152683-44153183	TSS	Cav1	Cav1 Itri2:44152683-44153183	0.806843	1.17797e-112	Promoter	Yes
Itri2:44153316-44153816	TSS	Cav1	Cav1 Itri2:44153316-44153816	0.683938	9.12663e-68	Promoter	Yes
Itri2:44154079-44154579	TSS	Cav1	Cav1 Itri2:44154079-44154579	0.786456	3.47228e-103	Promoter	Yes
Itri2:83768371-83768871	TSS	Cbx3	Cbx3 Itri2:83768371-83768871			Promoter	Yes
Itri2:83769231-83769731	TSS	Cbx3	Cbx3 Itri2:83769231-83769731			Promoter	No
Itri2:83769874-83770374	TSS	Cbx3	Cbx3 Itri2:83769874-83770374			Promoter	Yes
Itri11:66801895-66802395	TSS	Cc2d1b	Cc2d1b Itri11:66801895-66802395			Promoter	No
Itri11:66802417-66802917	TSS	Cc2d1b	Cc2d1b Itri11:66802417-66802917	0.370935	1.57126e-16	Promoter	Yes
Itri11:66803093-66803593	TSS	Cc2d1b	Cc2d1b Itri11:66803093-66803593			Other	No
Itri1:127779824-127780324	TSS	Ccdc112	Ccdc112 Itri1:127779824-127780324			Promoter	No
Itri1:127780346-127780846	TSS	Ccdc112	Ccdc112 Itri1:127780346-127780846			Promoter	Yes
Itri1:127780972-127781472	TSS	Ccdc112	Ccdc112 Itri1:127780972-127781472	0.494997	1.27612e-30	Promoter	Yes
Itri1:127782153-127782653	TSS	Ccdc112	Ccdc112 Itri1:127782153-127782653			PEs	No
Itri8:41988013-41988513	TSS	Ccdc167	Ccdc167 Itri8:41988013-41988513			PEs	No
Itri8:41988836-41989336	TSS	Ccdc167	Ccdc167 Itri8:41988836-41989336			Promoter	Yes
Itri8:41989498-41989998	TSS	Ccdc167	Ccdc167 Itri8:41989498-41989998			Other	No
Itri11:60922363-60922863	TSS	Ccdc17	Ccdc17 Itri11:60922363-60922863			Promoter	Yes
Itri11:60923219-60923719	TSS	Ccdc17	Ccdc17 Itri11:60923219-60923719			Promoter	Yes
Itri11:60924150-60924650	TSS	Ccdc17	Ccdc17 Itri11:60924150-60924650			PEs	No
Itri9:99387745-99388245	TSS	Ccdc181	Ccdc181 Itri9:99387745-99388245			Promoter	No
Itri9:99388279-99388779	TSS	Ccdc181	Ccdc181 Itri9:99388279-99388779	0.77455	3.99812e-98	Promoter	Yes
Itri9:99388912-99389412	TSS	Ccdc181	Ccdc181 Itri9:99388912-99389412	0.729903	1.29384e-81	Promoter	No
Itri3:202259849-202260349	TSS	CCDC183-like	CCDC183-like Itri3:202259849-202260349	0.554807	7.7878e-40	Promoter	No
Itri3:202260357-202260857	TSS	CCDC183-like	CCDC183-like Itri3:202260357-202260857	0.499263	3.2252e-31	Promoter	No
Itri17:7918922-7919422	TSS	Ccdc25	Ccdc25 Itri17:7918922-7919422			Other	No
Itri17:7919451-7919951	TSS	Ccdc25	Ccdc25 Itri17:7919451-7919951	-0.301188	6.06192e-11	Promoter	Yes
Itri17:7920039-7920539	TSS	Ccdc25	Ccdc25 Itri17:7920039-7920539			Promoter	Yes
Itri7:121033870-121034370	TSS	Ccdc50	Ccdc50 Itri7:121033870-121034370			Promoter	Yes
Itri7:121034649-121035149	TSS	Ccdc50	Ccdc50 Itri7:121034649-121035149			Promoter	Yes
Itri16:17948799-17949299	TSS	Ccdc61	Ccdc61 Itri16:17948799-17949299	0.691774	6.08552e-70	Promoter	Yes
Itri16:17949382-17949882	TSS	Ccdc61	Ccdc61 Itri16:17949382-17949882			Promoter	No
Itri2:157628987-157629487	TSS	Ccdc62	Ccdc62 Itri2:157628987-157629487	-0.291297	2.87898e-10	Promoter	Yes
Itri2:173888110-173888610	TSS	Ccdc66	Ccdc66 Itri2:173888110-173888610			PEs	No
Itri2:173888823-173889323	TSS	Ccdc66	Ccdc66 Itri2:173888823-173889323	0.36042	1.36258e-15	Promoter	Yes
Itri3:81162993-81163493	TSS	Ccdc82	Ccdc82 Itri3:81162993-81163493	-0.26859	8.15789e-09	Promoter	No
Itri3:81163503-81164003	TSS	Ccdc82	Ccdc82 Itri3:81163503-81164003			Promoter	No
Itri3:81164064-81164564	TSS	Ccdc82	Ccdc82 Itri3:81164064-81164564			Promoter	No
Itri3:7207234-7207734	TSS	Ccdc85b	Ccdc85b Itri3:7207234-7207734			Promoter	Yes
Itri3:7207932-7208432	TSS	Ccdc85b	Ccdc85b Itri3:7207932-7208432	0.40222	1.542e-19	Promoter	Yes
Itri3:7208528-7209028	TSS	Ccdc85b	Ccdc85b Itri3:7208528-7209028			Other	No
Itri5:6692733-6693233	TSS	Ccdc85c	Ccdc85c Itri5:6692733-6693233			Promoter	Yes
Itri5:6693347-6693847	TSS	Ccdc85c	Ccdc85c Itri5:6693347-6693847			Promoter	Yes
Itri5:6693926-6694426	TSS	Ccdc85c	Ccdc85c Itri5:6693926-6694426			Promoter	Yes
Itri5:6694661-6695161	TSS	Ccdc85c	Ccdc85c Itri5:6694661-6695161			Promoter	Yes
Itri12:26766311-26766811	TSS	Ccdc88a	Ccdc88a Itri12:26766311-26766811			Promoter	No
Itri12:26766852-26767352	TSS	Ccdc88a	Ccdc88a Itri12:26766852-26767352	0.277002	2.45363e-09	Promoter	Yes
Itri12:26767567-26768067	TSS	Ccdc88a	Ccdc88a Itri12:26767567-26768067	0.345354	2.61185e-14	Promoter	No
Itri4:81519081-81519581	TSS	Ccdc91	Ccdc91 Itri4:81519081-81519581			Promoter	No
Itri4:81520060-81520560	TSS	Ccdc91	Ccdc91 Itri4:81520060-81520560	-0.32454	1.1879e-12	Promoter	Yes
Itri6:89412954-89413454	TSS	Ccdc93	Ccdc93 Itri6:89412954-89413454	0.547339	1.40033e-38	Promoter	Yes
Itri6:89414216-89414716	TSS	Ccdc93	Ccdc93 Itri6:89414216-89414716			Promoter	No
Itri8:92708052-92708552	TSS	CCNC-like	CCNC-like Itri8:92708052-92708552			Promoter	Yes
Itri8:92708637-92709137	TSS	CCNC-like	CCNC-like Itri8:92708637-92709137			Promoter	Yes
Itri1:102171164-102171664	TSS	Ccng1	Ccng1 Itri1:102171164-102171664			Promoter	No
Itri1:102171889-102172389	TSS	Ccng1	Ccng1 Itri1:102171889-102172389			Promoter	Yes
Itri1:102172917-102173417	TSS	Ccng1	Ccng1 Itri1:102172917-102173417			Other	No
Itri14:10537801-10538301	TSS	Ccni	Ccni Itri14:10537801-10538301	0.282371	1.11413e-09	Promoter	Yes
Itri14:10538766-10539266	TSS	Ccni	Ccni Itri14:10538766-10539266			Promoter	Yes
Itri14:10539336-10539836	TSS	Ccni	Ccni Itri14:10539336-10539836			Promoter	Yes
Itri4:99303812-99304312	TSS	CCNI	CCNI Itri4:99303812-99304312			Promoter	Yes
Itri14:10537801-10538301	TSS	CCNI-like	CCNI-like Itri14:10537801-10538301			Promoter	Yes
Itri14:10538766-10539266	TSS	CCNI-like	CCNI-like Itri14:10538766-10539266			Promoter	Yes
Itri14:10539336-10539836	TSS	CCNI-like	CCNI-like Itri14:10539336-10539836			Promoter	Yes
Itri1:37378335-37378835	TSS	Ccnj	Ccnj Itri1:37378335-37378835			Promoter	Yes
Itri1:37379150-37379650	TSS	Ccnj	Ccnj Itri1:37379150-37379650			Promoter	Yes
Itri1:37379798-37380298	TSS	Ccnj	Ccnj Itri1:37379798-37380298			Promoter	Yes
Itri1:46156222-46156722	TSS	Ccser2	Ccser2 Itri1:46156222-46156722			Promoter	Yes
Itri1:46156772-46157272	TSS	Ccser2	Ccser2 Itri1:46156772-46157272	0.328905	5.46872e-13	Promoter	Yes
Itri1:46157350-46157850	TSS	Ccser2	Ccser2 Itri1:46157350-46157850			AEs	No
Itri7:137512745-137513245	TSS	Cd200	Cd200 Itri7:137512745-137513245			Promoter	No
Itri7:137513336-137513836	TSS	Cd200	Cd200 Itri7:137513336-137513836	-0.253891	6.00346e-08	Promoter	No
Itri7:137514172-137514672	TSS	Cd200	Cd200 Itri7:137514172-137514672			Other	No
Itri4:58669912-58670412	TSS	Cd63	Cd63 Itri4:58669912-58670412	0.289305	3.91138e-10	Promoter	Yes
Itri4:58670713-58671213	TSS	Cd63	Cd63 Itri4:58670713-58671213			Promoter	Yes
Itri4:58671436-58671936	TSS	Cd63	Cd63 Itri4:58671436-58671936	0.321264	2.10844e-12	Promoter	No
Itri4:58671941-58672441	TSS	Cd63	Cd63 Itri4:58671941-58672441	0.300801	6.45058e-11	Promoter	No
Itri9:50749849-50750349	TSS	Cdc42bpa	Cdc42bpa Itri9:50749849-50750349	0.419855	2.19502e-21	Promoter	No
Itri9:50750712-50751212	TSS	Cdc42bpa	Cdc42bpa Itri9:50750712-50751212	0.356173	3.18457e-15	Promoter	Yes
Itri9:50751419-50751919	TSS	Cdc42bpa	Cdc42bpa Itri9:50751419-50751919			Promoter	Yes
Itri9:50752076-50752576	TSS	Cdc42bpa	Cdc42bpa Itri9:50752076-50752576			Promoter	No
Itri5:3128172-3128672	TSS	CDC42BPB-like	CDC42BPB-like Itri5:3128172-3128672			Promoter	No
Itri5:3129810-3130310	TSS	CDC42BPB-like	CDC42BPB-like Itri5:3129810-3130310			Promoter	Yes
Itri5:3130336-3130836	TSS	CDC42BPB-like	CDC42BPB-like Itri5:3130336-3130836			Promoter	No
Itri7:39536091-39536591	TSS	Cdk5r1	Cdk5r1 Itri7:39536091-39536591			Promoter	Yes
Itri7:39536758-39537258	TSS	Cdk5r1	Cdk5r1 Itri7:39536758-39537258			Promoter	Yes
Itri14:11885317-11885817	TSS	Cdkl2	Cdkl2 Itri14:11885317-11885817			Other	No
Itri14:11886333-11886833	TSS	Cdkl2	Cdkl2 Itri14:11886333-11886833	0.306956	2.37267e-11	Promoter	No
Itri2:215969518-215970018	TSS	Celf5	Celf5 Itri2:215969518-215970018			Other	No
Itri2:215970495-215970995	TSS	Celf5	Celf5 Itri2:215970495-215970995			Other	No
Itri7:59543875-59544375	TSS	Cenpv	Cenpv Itri7:59543875-59544375			Promoter	Yes
Itri7:59544978-59545478	TSS	Cenpv	Cenpv Itri7:59544978-59545478			Promoter	No
Itri9:47315048-47315548	TSS	Cep170	Cep170 Itri9:47315048-47315548			Promoter	No
Itri9:47315616-47316116	TSS	Cep170	Cep170 Itri9:47315616-47316116			Promoter	No
Itri9:47316131-47316631	TSS	Cep170	Cep170 Itri9:47316131-47316631	-0.456982	1.17546e-25	Promoter	No
Itri9:47316641-47317141	TSS	Cep170	Cep170 Itri9:47316641-47317141			Promoter	No
Itri9:91357481-91357981	TSS	Cep350	Cep350 Itri9:91357481-91357981			Promoter	No
Itri9:91358149-91358649	TSS	Cep350	Cep350 Itri9:91358149-91358649			Promoter	Yes
Itri9:91358661-91359161	TSS	Cep350	Cep350 Itri9:91358661-91359161			Promoter	Yes
Itri9:91359287-91359787	TSS	Cep350	Cep350 Itri9:91359287-91359787			Promoter	Yes
Itri8:101016189-101016689	TSS	Cep57l1	Cep57l1 Itri8:101016189-101016689			Promoter	Yes
Itri8:101016719-101017219	TSS	Cep57l1	Cep57l1 Itri8:101016719-101017219			Promoter	Yes
Itri8:101017226-101017726	TSS	Cep57l1	Cep57l1 Itri8:101017226-101017726			Promoter	Yes
Itri8:101018391-101018891	TSS	Cep57l1	Cep57l1 Itri8:101018391-101018891			PEs	No
Itri16:8807849-8808349	TSS	Cep89	Cep89 Itri16:8807849-8808349			Promoter	No
Itri16:8808751-8809251	TSS	Cep89	Cep89 Itri16:8808751-8809251			Promoter	Yes
Itri1:30258885-30259385	TSS	Cfap58	Cfap58 Itri1:30258885-30259385			Other	Yes
Itri17:34021708-34022208	TSS	Cfap97	Cfap97 Itri17:34021708-34022208			PEs	No
Itri17:34022246-34022746	TSS	Cfap97	Cfap97 Itri17:34022246-34022746	0.657515	6.56575e-61	Promoter	No
Itri17:34023123-34023623	TSS	Cfap97	Cfap97 Itri17:34023123-34023623			Promoter	Yes
Itri2:217483009-217483509	TSS	Cfd	Cfd Itri2:217483009-217483509			PEs	No
Itri2:217483694-217484194	TSS	Cfd	Cfd Itri2:217483694-217484194	0.455313	1.87917e-25	PEs	No
Itri18:1681933-1682433	TSS	Cggbp1	Cggbp1 Itri18:1681933-1682433			Promoter	Yes
Itri18:1682816-1683316	TSS	Cggbp1	Cggbp1 Itri18:1682816-1683316	-0.437034	2.70299e-23	Promoter	Yes
Itri18:1683382-1683882	TSS	Cggbp1	Cggbp1 Itri18:1683382-1683882	0.347903	1.60284e-14	Promoter	Yes
Itri12:82168320-82168820	TSS	Chchd5	Chchd5 Itri12:82168320-82168820			Promoter	Yes
Itri12:82168867-82169367	TSS	Chchd5	Chchd5 Itri12:82168867-82169367			Promoter	No
Itri12:82169446-82169946	TSS	Chchd5	Chchd5 Itri12:82169446-82169946			Other	Yes
Itri16:53724077-53724577	TSS	Chd9	Chd9 Itri16:53724077-53724577	0.369036	2.33536e-16	AEs	Yes
Itri16:53724770-53725270	TSS	Chd9	Chd9 Itri16:53724770-53725270			AEs	No
Itri10:44549353-44549853	TSS	Chic1	Chic1 Itri10:44549353-44549853			Promoter	Yes
Itri10:44549962-44550462	TSS	Chic1	Chic1 Itri10:44549962-44550462			Promoter	Yes
Itri3:648253-648753	TSS	Chid1	Chid1 Itri3:648253-648753			Other	No
Itri3:649156-649656	TSS	Chid1	Chid1 Itri3:649156-649656			PEs	No
Itri10:60211629-60212129	TSS	Chm	Chm Itri10:60211629-60212129			PEs	Yes
Itri10:60212671-60213171	TSS	Chm	Chm Itri10:60212671-60213171			Promoter	Yes
Itri5:171949741-171950241	TSS	Chmp4b	Chmp4b Itri5:171949741-171950241			Other	No
Itri5:171950468-171950968	TSS	Chmp4b	Chmp4b Itri5:171950468-171950968	0.658293	4.21857e-61	Promoter	No
Itri5:171951045-171951545	TSS	Chmp4b	Chmp4b Itri5:171951045-171951545			Promoter	No
Itri5:171951627-171952127	TSS	Chmp4b	Chmp4b Itri5:171951627-171952127			Promoter	No
Itri5:65622989-65623489	TSS	Churc1	Churc1 Itri5:65622989-65623489			Promoter	No
Itri5:65623646-65624146	TSS	Churc1	Churc1 Itri5:65623646-65624146			Promoter	Yes
Itri5:65624209-65624709	TSS	Churc1	Churc1 Itri5:65624209-65624709			Promoter	No
Itri5:26129881-26130381	TSS	Cipc	Cipc Itri5:26129881-26130381	0.364402	6.07454e-16	Promoter	Yes
Itri5:26130438-26130938	TSS	Cipc	Cipc Itri5:26130438-26130938	0.802023	2.5634e-110	Promoter	Yes
Itri5:26131430-26131930	TSS	Cipc	Cipc Itri5:26131430-26131930	0.782846	1.29004e-101	AEs	Yes
Itri6:135617255-135617755	TSS	Cir1	Cir1 Itri6:135617255-135617755			Promoter	No
Itri6:135617918-135618418	TSS	Cir1	Cir1 Itri6:135617918-135618418	0.394112	9.99399e-19	Promoter	Yes
Itri6:135618460-135618960	TSS	Cir1	Cir1 Itri6:135618460-135618960			Promoter	No
Itri1:70636596-70637096	TSS	Cisd1	Cisd1 Itri1:70636596-70637096	0.367428	3.26065e-16	Promoter	Yes
Itri1:70637373-70637873	TSS	Cisd1	Cisd1 Itri1:70637373-70637873	0.678014	3.62993e-66	Promoter	Yes
Itri1:70638408-70638908	TSS	Cisd1	Cisd1 Itri1:70638408-70638908	0.401561	1.79867e-19	Promoter	No
Itri10:45586243-45586743	TSS	Cited1	Cited1 Itri10:45586243-45586743	0.403768	1.07306e-19	Promoter	Yes
Itri10:45586749-45587249	TSS	Cited1	Cited1 Itri10:45586749-45587249	0.494156	1.67078e-30	Promoter	Yes
Itri2:15434333-15434833	TSS	Clec2l	Clec2l Itri2:15434333-15434833			PEs	No
Itri2:15434866-15435366	TSS	Clec2l	Clec2l Itri2:15434866-15435366			Other	No
Itri2:15435786-15436286	TSS	Clec2l	Clec2l Itri2:15435786-15436286			Other	No
Itri8:40432545-40433045	TSS	Clpsl2	Clpsl2 Itri8:40432545-40433045			PEs	No
Itri8:40433121-40433621	TSS	Clpsl2	Clpsl2 Itri8:40433121-40433621			PEs	No
Itri8:40433720-40434220	TSS	Clpsl2	Clpsl2 Itri8:40433720-40434220	0.716691	2.37426e-77	Promoter	No
Itri8:40434317-40434817	TSS	Clpsl2	Clpsl2 Itri8:40434317-40434817	0.450985	6.262e-25	Promoter	No
Itri11:33242768-33243268	TSS	Clstn1	Clstn1 Itri11:33242768-33243268			AEs	No
Itri11:33243714-33244214	TSS	Clstn1	Clstn1 Itri11:33243714-33244214			AEs	No
Itri11:33244499-33244999	TSS	Clstn1	Clstn1 Itri11:33244499-33244999			Other	No
Itri4:102004604-102005104	TSS	Clstn3	Clstn3 Itri4:102004604-102005104			PEs	Yes
Itri4:102005554-102006054	TSS	Clstn3	Clstn3 Itri4:102005554-102006054			Promoter	Yes
Itri4:102006061-102006561	TSS	Clstn3	Clstn3 Itri4:102006061-102006561			PEs	No
Itri4:102006603-102007103	TSS	Clstn3	Clstn3 Itri4:102006603-102007103			Other	Yes
Itri3:167622374-167622874	TSS	Clta	Clta Itri3:167622374-167622874			Other	No
Itri3:167623050-167623550	TSS	Clta	Clta Itri3:167623050-167623550	0.571444	9.47631e-43	Promoter	Yes
Itri3:167623569-167624069	TSS	Clta	Clta Itri3:167623569-167624069			Promoter	No
Itri3:167624132-167624632	TSS	Clta	Clta Itri3:167624132-167624632			Promoter	No
Itri17:8071173-8071673	TSS	Clu	Clu Itri17:8071173-8071673	0.682954	1.69143e-67	AEs	No
Itri17:8071789-8072289	TSS	Clu	Clu Itri17:8071789-8072289	0.9028	3.20907e-180	AEs	No
Itri17:8072330-8072830	TSS	Clu	Clu Itri17:8072330-8072830	0.891716	2.35612e-169	Promoter	Yes
Itri17:8072847-8073347	TSS	Clu	Clu Itri17:8072847-8073347	0.722005	4.90999e-79	Promoter	No
Itri17:8073624-8074124	TSS	Clu	Clu Itri17:8073624-8074124	0.667178	2.46775e-63	Promoter	No
Itri7:150530778-150531278	TSS	Cmss1	Cmss1 Itri7:150530778-150531278			PEs	No
Itri7:150531301-150531801	TSS	Cmss1	Cmss1 Itri7:150531301-150531801			Promoter	No
Itri7:150531885-150532385	TSS	Cmss1	Cmss1 Itri7:150531885-150532385			Promoter	Yes
Itri7:150532444-150532944	TSS	Cmss1	Cmss1 Itri7:150532444-150532944			Promoter	No
Itri16:49203050-49203550	TSS	Cnot1	Cnot1 Itri16:49203050-49203550			Other	Yes
Itri16:49203787-49204287	TSS	Cnot1	Cnot1 Itri16:49203787-49204287	-0.464609	1.3323e-26	Promoter	Yes
Itri16:49204826-49205326	TSS	Cnot1	Cnot1 Itri16:49204826-49205326			Promoter	Yes
Itri9:50249171-50249671	TSS	Cnst	Cnst Itri9:50249171-50249671			Promoter	No
Itri9:50249925-50250425	TSS	Cnst	Cnst Itri9:50249925-50250425	0.61982	2.96384e-52	Promoter	Yes
Itri9:50250445-50250945	TSS	Cnst	Cnst Itri9:50250445-50250945	0.400277	2.42493e-19	Promoter	Yes
Itri9:50250988-50251488	TSS	Cnst	Cnst Itri9:50250988-50251488			Promoter	Yes
Itri19:5313143-5313643	TSS	CNTN3-like	CNTN3-like Itri19:5313143-5313643	0.547601	1.26679e-38	Promoter	No
Itri19:5313717-5314217	TSS	CNTN3-like	CNTN3-like Itri19:5313717-5314217	0.430257	1.57933e-22	Promoter	No
Itri19:5314866-5315366	TSS	CNTN3-like	CNTN3-like Itri19:5314866-5315366			Other	No
Itri12:84448286-84448786	TSS	COA5-containing	COA5-containing Itri12:84448286-84448786			Promoter	No
Itri12:84448849-84449349	TSS	COA5-containing	COA5-containing Itri12:84448849-84449349			Promoter	Yes
Itri12:84449431-84449931	TSS	COA5-containing	COA5-containing Itri12:84449431-84449931			Promoter	Yes
Itri9:41649554-41650054	TSS	COA6-containing	COA6-containing Itri9:41649554-41650054			Promoter	No
Itri9:41650363-41650863	TSS	COA6-containing	COA6-containing Itri9:41650363-41650863			Promoter	No
Itri9:41650890-41651390	TSS	COA6-containing	COA6-containing Itri9:41650890-41651390			Promoter	No
Itri9:41651523-41652023	TSS	COA6-containing	COA6-containing Itri9:41651523-41652023			Other	No
Itri7:31124037-31124537	TSS	Coil	Coil Itri7:31124037-31124537			Promoter	Yes
Itri7:31124691-31125191	TSS	Coil	Coil Itri7:31124691-31125191			Promoter	Yes
Itri7:31125230-31125730	TSS	Coil	Coil Itri7:31125230-31125730			Other	No
Itri4:193535104-193535604	TSS	Col4a2	Col4a2 Itri4:193535104-193535604			Promoter	No
Itri4:193536434-193536934	TSS	Col4a2	Col4a2 Itri4:193536434-193536934	0.280614	1.44533e-09	Promoter	Yes
Itri4:193537007-193537507	TSS	Col4a2	Col4a2 Itri4:193537007-193537507			Promoter	Yes
Itri2:209915737-209916237	TSS	Col5a3	Col5a3 Itri2:209915737-209916237	0.784181	3.41032e-102	PEs	No
Itri2:209916664-209917164	TSS	Col5a3	Col5a3 Itri2:209916664-209917164	0.840301	6.03942e-131	PEs	Yes
Itri12:47002013-47002513	TSS	Colec11	Colec11 Itri12:47002013-47002513	0.880161	3.14967e-159	PEs	No
Itri12:47002541-47003041	TSS	Colec11	Colec11 Itri12:47002541-47003041	0.779348	3.99563e-100	PEs	No
Itri12:47003296-47003796	TSS	Colec11	Colec11 Itri12:47003296-47003796	0.862055	2.82739e-145	Other	No
Itri9:22237032-22237532	TSS	Commd3	Commd3 Itri9:22237032-22237532	0.251179	8.55559e-08	Promoter	No
Itri9:22237552-22238052	TSS	Commd3	Commd3 Itri9:22237552-22238052	0.689649	2.40513e-69	Promoter	Yes
Itri9:22238287-22238787	TSS	Commd3	Commd3 Itri9:22238287-22238787	0.316966	4.42487e-12	Promoter	No
Itri5:116329693-116330193	TSS	Commd4	Commd4 Itri5:116329693-116330193			Promoter	No
Itri5:116330219-116330719	TSS	Commd4	Commd4 Itri5:116330219-116330719			Promoter	No
Itri5:116330794-116331294	TSS	Commd4	Commd4 Itri5:116330794-116331294			Promoter	No
Itri4:130173882-130174382	TSS	Commd6	Commd6 Itri4:130173882-130174382			Promoter	No
Itri4:130174610-130175110	TSS	Commd6	Commd6 Itri4:130174610-130175110			Promoter	Yes
Itri14:32682628-32683128	TSS	Commd8	Commd8 Itri14:32682628-32683128			AEs	No
Itri14:32683218-32683718	TSS	Commd8	Commd8 Itri14:32683218-32683718			Promoter	Yes
Itri14:32683727-32684227	TSS	Commd8	Commd8 Itri14:32683727-32684227			Promoter	No
Itri6:155117752-155118252	TSS	Coq10b	Coq10b Itri6:155117752-155118252			AEs	No
Itri6:155118741-155119241	TSS	Coq10b	Coq10b Itri6:155118741-155119241	0.783642	5.85388e-102	Promoter	Yes
Itri6:155119375-155119875	TSS	Coq10b	Coq10b Itri6:155119375-155119875			Promoter	No
Itri3:5865538-5866038	TSS	Coro1b	Coro1b Itri3:5865538-5866038			Promoter	No
Itri3:5866312-5866812	TSS	Coro1b	Coro1b Itri3:5866312-5866812			Other	No
Itri11:33800952-33801452	TSS	Cort	Cort Itri11:33800952-33801452			Other	No
Itri11:33802614-33803114	TSS	Cort	Cort Itri11:33802614-33803114			Other	No
Itri7:130925732-130926232	TSS	COX17-like	COX17-like Itri7:130925732-130926232	0.594305	4.85884e-47	Promoter	Yes
Itri7:130926275-130926775	TSS	COX17-like	COX17-like Itri7:130926275-130926775	0.301008	6.23989e-11	Promoter	No
Itri2:146008761-146009261	TSS	COX6A1	COX6A1 Itri2:146008761-146009261	-0.331968	3.14801e-13	Promoter	No
Itri2:146009752-146010252	TSS	COX6A1	COX6A1 Itri2:146009752-146010252	0.670308	3.85434e-64	Promoter	Yes
Itri2:146010506-146011006	TSS	COX6A1	COX6A1 Itri2:146010506-146011006			Other	No
Itri1:93135290-93135790	TSS	Cpeb4	Cpeb4 Itri1:93135290-93135790			Promoter	Yes
Itri1:93135863-93136363	TSS	Cpeb4	Cpeb4 Itri1:93135863-93136363			Promoter	Yes
Itri1:93136510-93137010	TSS	Cpeb4	Cpeb4 Itri1:93136510-93137010			Promoter	No
Itri14:68613810-68614310	TSS	Cplx1	Cplx1 Itri14:68613810-68614310	0.292848	2.26441e-10	PEs	No
Itri14:68614344-68614844	TSS	Cplx1	Cplx1 Itri14:68614344-68614844			PEs	No
Itri5:115949440-115949940	TSS	Cplx3	Cplx3 Itri5:115949440-115949940	0.501895	1.36573e-31	AEs	Yes
Itri5:115950259-115950759	TSS	Cplx3	Cplx3 Itri5:115950259-115950759	0.811509	5.55931e-115	Promoter	Yes
Itri5:115950838-115951338	TSS	Cplx3	Cplx3 Itri5:115950838-115951338	0.904867	2.16421e-182	Promoter	Yes
Itri13:30175755-30176255	TSS	Cplx4	Cplx4 Itri13:30175755-30176255	0.57764	7.04624e-44	AEs	No
Itri13:30176363-30176863	TSS	Cplx4	Cplx4 Itri13:30176363-30176863	0.870221	2.66283e-151	Promoter	Yes
Itri13:30176882-30177382	TSS	Cplx4	Cplx4 Itri13:30176882-30177382	0.797468	3.64842e-108	Promoter	Yes
Itri5:118823294-118823794	TSS	Crabp1	Crabp1 Itri5:118823294-118823794	0.440936	9.60404e-24	Promoter	No
Itri5:118823855-118824355	TSS	Crabp1	Crabp1 Itri5:118823855-118824355	0.344891	2.8526e-14	Promoter	Yes
Itri5:118824483-118824983	TSS	Crabp1	Crabp1 Itri5:118824483-118824983	0.546867	1.6769e-38	Promoter	Yes
Itri5:118824989-118825489	TSS	Crabp1	Crabp1 Itri5:118824989-118825489	0.573433	4.14031e-43	Promoter	No
Itri5:118825685-118826185	TSS	Crabp1	Crabp1 Itri5:118825685-118826185			PEs	No
Itri3:71953067-71953567	TSS	Crebzf	Crebzf Itri3:71953067-71953567			Promoter	Yes
Itri3:71953772-71954272	TSS	Crebzf	Crebzf Itri3:71953772-71954272			Promoter	Yes
Itri3:71954277-71954777	TSS	Crebzf	Crebzf Itri3:71954277-71954777			Promoter	Yes
Itri3:71955234-71955734	TSS	Crebzf	Crebzf Itri3:71955234-71955734			AEs	No
Itri4:843155-843655	TSS	Creld2	Creld2 Itri4:843155-843655			Promoter	Yes
Itri4:843854-844354	TSS	Creld2	Creld2 Itri4:843854-844354			Promoter	Yes
Itri4:844388-844888	TSS	Creld2	Creld2 Itri4:844388-844888			Promoter	No
Itri14:64353080-64353580	TSS	CRMP1	CRMP1 Itri14:64353080-64353580	0.468429	4.38364e-27	Promoter	Yes
Itri14:64354574-64355074	TSS	CRMP1	CRMP1 Itri14:64354574-64355074	0.29734	1.11952e-10	Other	Yes
Itri2:203076201-203076701	TSS	Crtc1	Crtc1 Itri2:203076201-203076701	0.330623	4.01523e-13	Promoter	Yes
Itri2:203076710-203077210	TSS	Crtc1	Crtc1 Itri2:203076710-203077210			Other	No
Itri2:115542675-115543175	TSS	Crybb2	Crybb2 Itri2:115542675-115543175			Other	No
Itri2:115543412-115543912	TSS	Crybb2	Crybb2 Itri2:115543412-115543912			PEs	No
Itri2:115544190-115544690	TSS	Crybb2	Crybb2 Itri2:115544190-115544690			PEs	No
Itri2:115544788-115545288	TSS	Crybb2	Crybb2 Itri2:115544788-115545288			Other	No
Itri2:115569917-115570417	TSS	Crybb3	Crybb3 Itri2:115569917-115570417	0.487028	1.58514e-29	AEs	No
Itri2:115570929-115571429	TSS	Crybb3	Crybb3 Itri2:115570929-115571429	0.70678	2.60376e-74	AEs	Yes
Itri2:115572030-115572530	TSS	Crybb3	Crybb3 Itri2:115572030-115572530	0.335571	1.6303e-13	AEs	No
Itri7:152387980-152388480	TSS	Crybg3	Crybg3 Itri7:152387980-152388480			Promoter	No
Itri7:152388669-152389169	TSS	Crybg3	Crybg3 Itri7:152388669-152389169	0.270256	6.45283e-09	Promoter	No
Itri7:152389686-152390186	TSS	Crybg3	Crybg3 Itri7:152389686-152390186			PEs	No
Itri4:7360144-7360644	TSS	Csdc2	Csdc2 Itri4:7360144-7360644			Other	No
Itri4:7361046-7361546	TSS	Csdc2	Csdc2 Itri4:7361046-7361546			Other	No
Itri4:7362105-7362605	TSS	Csdc2	Csdc2 Itri4:7362105-7362605	0.474694	6.86327e-28	AEs	No
Itri16:49515080-49515580	TSS	Csnk2a2	Csnk2a2 Itri16:49515080-49515580			Promoter	Yes
Itri6:127808481-127808981	TSS	Csrnp3	Csrnp3 Itri6:127808481-127808981			Promoter	Yes
Itri18:36964425-36964925	TSS	Cstb	Cstb Itri18:36964425-36964925			Other	No
Itri1:12300124-12300624	TSS	Ctbp2	Ctbp2 Itri1:12300124-12300624			Other	No
Itri1:12300838-12301338	TSS	Ctbp2	Ctbp2 Itri1:12300838-12301338			Other	No
Itri4:145474074-145474574	TSS	CTBP2-like	CTBP2-like Itri4:145474074-145474574			Other	Yes
Itri7:47068171-47068671	TSS	Ctdnep1	Ctdnep1 Itri7:47068171-47068671			Promoter	No
Itri7:47068716-47069216	TSS	Ctdnep1	Ctdnep1 Itri7:47068716-47069216			Promoter	Yes
Itri7:47069485-47069985	TSS	Ctdnep1	Ctdnep1 Itri7:47069485-47069985			Promoter	Yes
Itri7:47070157-47070657	TSS	Ctdnep1	Ctdnep1 Itri7:47070157-47070657			Promoter	Yes
Itri3:14687362-14687862	TSS	Ctnnd1	Ctnnd1 Itri3:14687362-14687862			Promoter	Yes
Itri3:14687868-14688368	TSS	Ctnnd1	Ctnnd1 Itri3:14687868-14688368			Promoter	Yes
Itri3:14688383-14688883	TSS	Ctnnd1	Ctnnd1 Itri3:14688383-14688883			Promoter	Yes
Itri5:119307418-119307918	TSS	Ctsh	Ctsh Itri5:119307418-119307918			Promoter	No
Itri5:119307956-119308456	TSS	Ctsh	Ctsh Itri5:119307956-119308456			Promoter	Yes
Itri5:119308569-119309069	TSS	Ctsh	Ctsh Itri5:119308569-119309069			PEs	No
Itri2:45303234-45303734	TSS	Cttnbp2	Cttnbp2 Itri2:45303234-45303734			PEs	No
Itri2:45304619-45305119	TSS	Cttnbp2	Cttnbp2 Itri2:45304619-45305119			PEs	No
Itri2:45305171-45305671	TSS	Cttnbp2	Cttnbp2 Itri2:45305171-45305671			PEs	No
Itri16:22858865-22859365	TSS	Ctu1	Ctu1 Itri16:22858865-22859365			Promoter	No
Itri16:22859614-22860114	TSS	Ctu1	Ctu1 Itri16:22859614-22860114			Promoter	Yes
Itri8:38479350-38479850	TSS	Cuta	Cuta Itri8:38479350-38479850			Promoter	Yes
Itri8:38480032-38480532	TSS	Cuta	Cuta Itri8:38480032-38480532			Promoter	Yes
Itri8:38480771-38481271	TSS	Cuta	Cuta Itri8:38480771-38481271	-0.454864	2.13082e-25	Promoter	Yes
Itri3:90343501-90344001	TSS	Cwf19l2	Cwf19l2 Itri3:90343501-90344001			Promoter	Yes
Itri3:90344019-90344519	TSS	Cwf19l2	Cwf19l2 Itri3:90344019-90344519			Promoter	No
Itri18:15050778-15051278	TSS	Cxadr	Cxadr Itri18:15050778-15051278			Promoter	Yes
Itri18:15051403-15051903	TSS	Cxadr	Cxadr Itri18:15051403-15051903	0.37775	3.70656e-17	Promoter	Yes
Itri18:15051908-15052408	TSS	Cxadr	Cxadr Itri18:15051908-15052408	0.274596	3.47566e-09	Promoter	Yes
Itri4:6414961-6415461	TSS	CYB5R3-like	CYB5R3-like Itri4:6414961-6415461			Other	No
Itri6:657733-658233	TSS	CYC1-like	CYC1-like Itri6:657733-658233	0.327245	7.35721e-13	Promoter	Yes
Itri6:658372-658872	TSS	CYC1-like	CYC1-like Itri6:658372-658872			Promoter	Yes
Itri6:658918-659418	TSS	CYC1-like	CYC1-like Itri6:658918-659418	0.41991	2.16525e-21	Promoter	Yes
Itri6:659625-660125	TSS	CYC1-like	CYC1-like Itri6:659625-660125			Promoter	No
Itri5:70599185-70599685	TSS	Daam1	Daam1 Itri5:70599185-70599685	0.71904	4.3231e-78	Promoter	Yes
Itri5:70599899-70600399	TSS	Daam1	Daam1 Itri5:70599899-70600399	0.749318	2.30004e-88	Promoter	Yes
Itri4:133481724-133482224	TSS	Dach1	Dach1 Itri4:133481724-133482224	0.338977	8.68641e-14	Promoter	Yes
Itri12:10105304-10105804	TSS	Dctn1	Dctn1 Itri12:10105304-10105804			Promoter	Yes
Itri12:10106027-10106527	TSS	Dctn1	Dctn1 Itri12:10106027-10106527			Promoter	Yes
Itri1:142677791-142678291	TSS	Dctn4	Dctn4 Itri1:142677791-142678291			Promoter	No
Itri1:142678418-142678918	TSS	Dctn4	Dctn4 Itri1:142678418-142678918	-0.42456	6.75599e-22	Promoter	No
Itri1:142679062-142679562	TSS	Dctn4	Dctn4 Itri1:142679062-142679562			Promoter	No
Itri17:57293195-57293695	TSS	Dctn6	Dctn6 Itri17:57293195-57293695			Promoter	No
Itri17:57293710-57294210	TSS	Dctn6	Dctn6 Itri17:57293710-57294210	0.265543	1.24722e-08	Promoter	Yes
Itri17:57294358-57294858	TSS	Dctn6	Dctn6 Itri17:57294358-57294858			Other	No
Itri4:195665129-195665629	TSS	Dcun1d2	Dcun1d2 Itri4:195665129-195665629			Promoter	No
Itri4:195665649-195666149	TSS	Dcun1d2	Dcun1d2 Itri4:195665649-195666149			Promoter	No
Itri4:195666254-195666754	TSS	Dcun1d2	Dcun1d2 Itri4:195666254-195666754	-0.331301	3.55236e-13	Promoter	Yes
Itri4:195666763-195667263	TSS	Dcun1d2	Dcun1d2 Itri4:195666763-195667263			Promoter	No
Itri5:76012034-76012534	TSS	Ddhd1	Ddhd1 Itri5:76012034-76012534			Promoter	Yes
Itri5:76012647-76013147	TSS	Ddhd1	Ddhd1 Itri5:76012647-76013147	0.625223	2.02085e-53	Promoter	No
Itri1:134235095-134235595	TSS	DDHD1	DDHD1 Itri1:134235095-134235595			Promoter	No
Itri1:58155062-58155562	TSS	Ddit4	Ddit4 Itri1:58155062-58155562	0.305653	2.93781e-11	Promoter	Yes
Itri1:58155579-58156079	TSS	Ddit4	Ddit4 Itri1:58155579-58156079			Promoter	Yes
Itri1:58156137-58156637	TSS	Ddit4	Ddit4 Itri1:58156137-58156637	0.376484	4.86148e-17	Promoter	Yes
Itri1:58156912-58157412	TSS	Ddit4	Ddit4 Itri1:58156912-58157412			Promoter	Yes
Itri4:9795253-9795753	TSS	Ddx17	Ddx17 Itri4:9795253-9795753			Promoter	No
Itri4:9795761-9796261	TSS	Ddx17	Ddx17 Itri4:9795761-9796261			Promoter	Yes
Itri4:9796511-9797011	TSS	Ddx17	Ddx17 Itri4:9796511-9797011			Promoter	Yes
Itri4:66480929-66481429	TSS	Ddx23	Ddx23 Itri4:66480929-66481429			Promoter	No
Itri4:66481943-66482443	TSS	Ddx23	Ddx23 Itri4:66481943-66482443	0.283476	9.44643e-10	Promoter	Yes
Itri4:66482482-66482982	TSS	Ddx23	Ddx23 Itri4:66482482-66482982			Promoter	Yes
Itri4:66483109-66483609	TSS	Ddx23	Ddx23 Itri4:66483109-66483609			Other	No
Itri2:202873016-202873516	TSS	Ddx49	Ddx49 Itri2:202873016-202873516			Promoter	No
Itri2:202873552-202874052	TSS	Ddx49	Ddx49 Itri2:202873552-202874052	0.375118	6.50276e-17	Promoter	Yes
Itri2:202874160-202874660	TSS	Ddx49	Ddx49 Itri2:202874160-202874660			Promoter	No
Itri2:174871067-174871567	TSS	Dennd6a	Dennd6a Itri2:174871067-174871567			Promoter	No
Itri2:174871629-174872129	TSS	Dennd6a	Dennd6a Itri2:174871629-174872129			Promoter	No
Itri2:174872479-174872979	TSS	Dennd6a	Dennd6a Itri2:174872479-174872979			PEs	No
Itri9:111240812-111241312	TSS	Dexi	Dexi Itri9:111240812-111241312			Promoter	No
Itri9:111241427-111241927	TSS	Dexi	Dexi Itri9:111241427-111241927			Promoter	Yes
Itri9:111241998-111242498	TSS	Dexi	Dexi Itri9:111241998-111242498			Promoter	Yes
Itri9:111242598-111243098	TSS	Dexi	Dexi Itri9:111242598-111243098			Other	No
Itri9:111243101-111243601	TSS	Dexi	Dexi Itri9:111243101-111243601			Other	No
Itri3:20620538-20621038	TSS	Dgkz	Dgkz Itri3:20620538-20621038			Other	No
Itri3:20621243-20621743	TSS	Dgkz	Dgkz Itri3:20621243-20621743			Other	No
Itri3:20621945-20622445	TSS	Dgkz	Dgkz Itri3:20621945-20622445			Other	No
Itri3:20622990-20623490	TSS	Dgkz	Dgkz Itri3:20622990-20623490			Other	No
Itri2:208544232-208544732	TSS	Dhps	Dhps Itri2:208544232-208544732	0.271831	5.1611e-09	Promoter	No
Itri2:208544868-208545368	TSS	Dhps	Dhps Itri2:208544868-208545368	0.443822	4.42481e-24	Promoter	Yes
Itri2:208545459-208545959	TSS	Dhps	Dhps Itri2:208545459-208545959			Promoter	No
Itri5:69832729-69833229	TSS	Dhrs7	Dhrs7 Itri5:69832729-69833229			Promoter	No
Itri5:69833288-69833788	TSS	Dhrs7	Dhrs7 Itri5:69833288-69833788	0.270991	5.81436e-09	Promoter	Yes
Itri5:69833964-69834464	TSS	Dhrs7	Dhrs7 Itri5:69833964-69834464			Promoter	No
Itri1:203521732-203522232	TSS	Dhx29	Dhx29 Itri1:203521732-203522232			Promoter	Yes
Itri1:203522420-203522920	TSS	Dhx29	Dhx29 Itri1:203522420-203522920			Promoter	Yes
Itri1:203523043-203523543	TSS	Dhx29	Dhx29 Itri1:203523043-203523543			Promoter	Yes
Itri7:87745656-87746156	TSS	Dhx36	Dhx36 Itri7:87745656-87746156			Other	No
Itri7:87746792-87747292	TSS	Dhx36	Dhx36 Itri7:87746792-87747292			Promoter	Yes
Itri7:87747473-87747973	TSS	Dhx36	Dhx36 Itri7:87747473-87747973			Promoter	No
Itri9:89087433-89087933	TSS	Dhx9	Dhx9 Itri9:89087433-89087933			Promoter	No
Itri9:89088149-89088649	TSS	Dhx9	Dhx9 Itri9:89088149-89088649			Promoter	Yes
Itri7:128483231-128483731	TSS	Dirc2	Dirc2 Itri7:128483231-128483731			Promoter	Yes
Itri7:128484065-128484565	TSS	Dirc2	Dirc2 Itri7:128484065-128484565			Promoter	Yes
Itri17:46351006-46351506	TSS	Dkk4	Dkk4 Itri17:46351006-46351506			Promoter	No
Itri17:46351544-46352044	TSS	Dkk4	Dkk4 Itri17:46351544-46352044			Promoter	No
Itri17:46352073-46352573	TSS	Dkk4	Dkk4 Itri17:46352073-46352573			Promoter	No
Itri16:21638338-21638838	TSS	Dkkl1	Dkkl1 Itri16:21638338-21638838			Promoter	No
Itri16:21639259-21639759	TSS	Dkkl1	Dkkl1 Itri16:21639259-21639759			Promoter	No
Itri16:21639833-21640333	TSS	Dkkl1	Dkkl1 Itri16:21639833-21640333			Promoter	No
Itri16:21640368-21640868	TSS	Dkkl1	Dkkl1 Itri16:21640368-21640868			Promoter	No
Itri3:71919109-71919609	TSS	Dlg2	Dlg2 Itri3:71919109-71919609	0.724464	7.90202e-80	Promoter	Yes
Itri3:71919665-71920165	TSS	Dlg2	Dlg2 Itri3:71919665-71920165			Promoter	No
Itri3:71920266-71920766	TSS	Dlg2	Dlg2 Itri3:71920266-71920766	0.506477	3.00591e-32	Promoter	Yes
Itri3:71921060-71921560	TSS	Dlg2	Dlg2 Itri3:71921060-71921560			Promoter	No
Itri3:165051733-165052233	TSS	Dnaja1	Dnaja1 Itri3:165051733-165052233			Promoter	No
Itri3:165052406-165052906	TSS	Dnaja1	Dnaja1 Itri3:165052406-165052906	-0.275135	3.21535e-09	Promoter	Yes
Itri3:165052907-165053407	TSS	Dnaja1	Dnaja1 Itri3:165052907-165053407			Promoter	Yes
Itri3:165053669-165054169	TSS	Dnaja1	Dnaja1 Itri3:165053669-165054169			Promoter	No
Itri1:58090583-58091083	TSS	Dnajb12	Dnajb12 Itri1:58090583-58091083			PEs	No
Itri1:58091205-58091705	TSS	Dnajb12	Dnajb12 Itri1:58091205-58091705	0.294218	1.82948e-10	Promoter	No
Itri1:58091723-58092223	TSS	Dnajb12	Dnajb12 Itri1:58091723-58092223			Promoter	No
Itri3:201936414-201936914	TSS	Dnlz	Dnlz Itri3:201936414-201936914			Promoter	No
Itri3:201937133-201937633	TSS	Dnlz	Dnlz Itri3:201937133-201937633			Promoter	Yes
Itri3:201937853-201938353	TSS	Dnlz	Dnlz Itri3:201937853-201938353			Promoter	No
Itri13:22137985-22138485	TSS	DOK6	DOK6 Itri13:22137985-22138485			Other	No
Itri5:29831640-29832140	TSS	Dpf3	Dpf3 Itri5:29831640-29832140			PEs	No
Itri5:29832224-29832724	TSS	Dpf3	Dpf3 Itri5:29832224-29832724			Promoter	Yes
Itri5:29832759-29833259	TSS	Dpf3	Dpf3 Itri5:29832759-29833259	0.679875	1.15288e-66	Promoter	Yes
Itri5:29833301-29833801	TSS	Dpf3	Dpf3 Itri5:29833301-29833801	0.273847	3.87013e-09	Promoter	Yes
Itri5:29833840-29834340	TSS	Dpf3	Dpf3 Itri5:29833840-29834340	0.634084	2.1816e-55	Promoter	Yes
Itri3:202856917-202857417	TSS	Dph7	Dph7 Itri3:202856917-202857417			Other	No
Itri3:202857585-202858085	TSS	Dph7	Dph7 Itri3:202857585-202858085			Promoter	No
Itri3:202858145-202858645	TSS	Dph7	Dph7 Itri3:202858145-202858645	0.273164	4.26795e-09	Promoter	Yes
Itri3:202858810-202859310	TSS	Dph7	Dph7 Itri3:202858810-202859310			Other	No
Itri5:188377933-188378433	TSS	Dpm1	Dpm1 Itri5:188377933-188378433			Promoter	Yes
Itri5:188378676-188379176	TSS	Dpm1	Dpm1 Itri5:188378676-188379176			Promoter	Yes
Itri5:188379282-188379782	TSS	Dpm1	Dpm1 Itri5:188379282-188379782			Promoter	Yes
Itri5:107931243-107931743	TSS	Dpp8	Dpp8 Itri5:107931243-107931743	-0.349785	1.11464e-14	Promoter	Yes
Itri5:107931790-107932290	TSS	Dpp8	Dpp8 Itri5:107931790-107932290			Promoter	Yes
Itri16:8364763-8365263	TSS	Dpy19l3	Dpy19l3 Itri16:8364763-8365263			Promoter	No
Itri16:8365315-8365815	TSS	Dpy19l3	Dpy19l3 Itri16:8365315-8365815	-0.276979	2.46166e-09	Promoter	Yes
Itri12:65152237-65152737	TSS	Dpysl5	Dpysl5 Itri12:65152237-65152737	-0.316146	5.09051e-12	Promoter	No
Itri12:65152802-65153302	TSS	Dpysl5	Dpysl5 Itri12:65152802-65153302	0.506287	3.20295e-32	Promoter	Yes
Itri12:65153530-65154030	TSS	Dpysl5	Dpysl5 Itri12:65153530-65154030			Promoter	Yes
Itri12:65154139-65154639	TSS	Dpysl5	Dpysl5 Itri12:65154139-65154639	0.364293	6.21072e-16	Promoter	Yes
Itri3:7179358-7179858	TSS	Drap1	Drap1 Itri3:7179358-7179858			Other	No
Itri3:7180094-7180594	TSS	Drap1	Drap1 Itri3:7180094-7180594			Promoter	Yes
Itri3:467507-468007	TSS	Drd4	Drd4 Itri3:467507-468007	0.826303	8.20835e-123	PEs	No
Itri3:468094-468594	TSS	Drd4	Drd4 Itri3:468094-468594	0.887416	1.81241e-165	PEs	Yes
Itri3:468601-469101	TSS	Drd4	Drd4 Itri3:468601-469101	0.828895	2.89567e-124	PEs	Yes
Itri3:469135-469635	TSS	Drd4	Drd4 Itri3:469135-469635	0.942598	6.31747e-234	PEs	Yes
Itri3:100017743-100018243	TSS	Dscaml1	Dscaml1 Itri3:100017743-100018243	0.580744	1.87602e-44	Promoter	No
Itri3:100018325-100018825	TSS	Dscaml1	Dscaml1 Itri3:100018325-100018825	0.699414	3.92981e-72	Promoter	Yes
Itri3:100018854-100019354	TSS	Dscaml1	Dscaml1 Itri3:100018854-100019354	0.352021	7.2135e-15	Other	No
Itri8:59614710-59615210	TSS	Dst	Dst Itri8:59614710-59615210			Promoter	No
Itri8:59616220-59616720	TSS	Dst	Dst Itri8:59616220-59616720	-0.435349	4.20903e-23	Promoter	Yes
Itri5:154105164-154105664	TSS	Dstn	Dstn Itri5:154105164-154105664			Promoter	Yes
Itri5:154105880-154106380	TSS	Dstn	Dstn Itri5:154105880-154106380	0.268975	7.72853e-09	Promoter	Yes
Itri5:154106406-154106906	TSS	Dstn	Dstn Itri5:154106406-154106906			Promoter	Yes
Itri5:153286953-153287453	TSS	Dtd1	Dtd1 Itri5:153286953-153287453			Promoter	Yes
Itri5:153287576-153288076	TSS	Dtd1	Dtd1 Itri5:153287576-153288076			Promoter	Yes
Itri5:153288207-153288707	TSS	Dtd1	Dtd1 Itri5:153288207-153288707			Other	No
Itri13:51029975-51030475	TSS	Dtna	Dtna Itri13:51029975-51030475			PEs	No
Itri11:7635669-7636169	TSS	Dusp12	Dusp12 Itri11:7635669-7636169			PEs	No
Itri11:7636493-7636993	TSS	Dusp12	Dusp12 Itri11:7636493-7636993			Promoter	Yes
Itri11:7637217-7637717	TSS	Dusp12	Dusp12 Itri11:7637217-7637717			Promoter	No
Itri2:205136324-205136824	TSS	DUSP12-like	DUSP12-like Itri2:205136324-205136824			Other	No
Itri12:83018984-83019484	TSS	Dusp2	Dusp2 Itri12:83018984-83019484	0.730444	8.53609e-82	Other	No
Itri12:83019508-83020008	TSS	Dusp2	Dusp2 Itri12:83019508-83020008	0.768411	1.23848e-95	Other	Yes
Itri11:27668234-27668734	TSS	Dvl1	Dvl1 Itri11:27668234-27668734			Promoter	Yes
Itri11:27669278-27669778	TSS	Dvl1	Dvl1 Itri11:27669278-27669778			Promoter	No
Itri5:3969009-3969509	TSS	Dync1h1	Dync1h1 Itri5:3969009-3969509			Promoter	Yes
Itri5:3970825-3971325	TSS	Dync1h1	Dync1h1 Itri5:3970825-3971325			AEs	No
Itri6:133360850-133361350	TSS	Dync1i2	Dync1i2 Itri6:133360850-133361350			Promoter	Yes
Itri6:133361404-133361904	TSS	Dync1i2	Dync1i2 Itri6:133361404-133361904			Promoter	Yes
Itri16:42552035-42552535	TSS	Dync1li2	Dync1li2 Itri16:42552035-42552535			PEs	No
Itri16:42552559-42553059	TSS	Dync1li2	Dync1li2 Itri16:42552559-42553059	-0.370993	1.55224e-16	Promoter	Yes
Itri16:42553205-42553705	TSS	Dync1li2	Dync1li2 Itri16:42553205-42553705			Promoter	Yes
Itri16:42553786-42554286	TSS	Dync1li2	Dync1li2 Itri16:42553786-42554286			Promoter	Yes
Itri4:48565904-48566404	TSS	Dyrk2	Dyrk2 Itri4:48565904-48566404			Promoter	Yes
Itri4:48566418-48566918	TSS	Dyrk2	Dyrk2 Itri4:48566418-48566918			Promoter	Yes
Itri4:48567006-48567506	TSS	Dyrk2	Dyrk2 Itri4:48567006-48567506			Promoter	Yes
Itri4:48567773-48568273	TSS	Dyrk2	Dyrk2 Itri4:48567773-48568273			Promoter	No
Itri1:6063303-6063803	TSS	Echs1	Echs1 Itri1:6063303-6063803			Other	No
Itri1:6063805-6064305	TSS	Echs1	Echs1 Itri1:6063805-6064305			Promoter	No
Itri1:6064418-6064918	TSS	Echs1	Echs1 Itri1:6064418-6064918			Promoter	Yes
Itri1:6064942-6065442	TSS	Echs1	Echs1 Itri1:6064942-6065442			Promoter	Yes
Itri1:6065448-6065948	TSS	Echs1	Echs1 Itri1:6065448-6065948			Promoter	No
Itri3:202340489-202340989	TSS	Edf1	Edf1 Itri3:202340489-202340989			Promoter	No
Itri1:179233906-179234406	TSS	Edil3	Edil3 Itri1:179233906-179234406			Promoter	Yes
Itri1:179234437-179234937	TSS	Edil3	Edil3 Itri1:179234437-179234937	0.275964	2.85225e-09	Promoter	Yes
Itri1:179234994-179235494	TSS	Edil3	Edil3 Itri1:179234994-179235494			Promoter	Yes
Itri1:179235586-179236086	TSS	Edil3	Edil3 Itri1:179235586-179236086			Promoter	Yes
Itri6:162903217-162903717	TSS	Eef1b2	Eef1b2 Itri6:162903217-162903717			Promoter	Yes
Itri6:162903753-162904253	TSS	Eef1b2	Eef1b2 Itri6:162903753-162904253	0.276259	2.73312e-09	Promoter	Yes
Itri6:162904279-162904779	TSS	Eef1b2	Eef1b2 Itri6:162904279-162904779			Promoter	Yes
Itri9:43178928-43179428	TSS	Egln1	Egln1 Itri9:43178928-43179428			Promoter	Yes
Itri9:43179499-43179999	TSS	Egln1	Egln1 Itri9:43179499-43179999			Promoter	No
Itri5:93349316-93349816	TSS	Eid1	Eid1 Itri5:93349316-93349816			PEs	No
Itri5:93349827-93350327	TSS	Eid1	Eid1 Itri5:93349827-93350327	0.255205	5.04985e-08	Promoter	No
Itri5:93350379-93350879	TSS	Eid1	Eid1 Itri5:93350379-93350879			Promoter	Yes
Itri16:13937901-13938401	TSS	Eid2	Eid2 Itri16:13937901-13938401			Promoter	Yes
Itri16:13938421-13938921	TSS	Eid2	Eid2 Itri16:13938421-13938921			Promoter	Yes
Itri3:7111570-7112070	TSS	Eif1ad	Eif1ad Itri3:7111570-7112070			Promoter	No
Itri3:7112458-7112958	TSS	Eif1ad	Eif1ad Itri3:7112458-7112958			Promoter	No
Itri3:7113050-7113550	TSS	Eif1ad	Eif1ad Itri3:7113050-7113550			Promoter	No
Itri2:196151208-196151708	TSS	Eif1b	Eif1b Itri2:196151208-196151708			Promoter	No
Itri2:196152040-196152540	TSS	Eif1b	Eif1b Itri2:196152040-196152540			Promoter	Yes
Itri2:196152542-196153042	TSS	Eif1b	Eif1b Itri2:196152542-196153042			Promoter	No
Itri9:139554757-139555257	TSS	Eif2ak1	Eif2ak1 Itri9:139554757-139555257			Promoter	No
Itri9:139555362-139555862	TSS	Eif2ak1	Eif2ak1 Itri9:139555362-139555862			Promoter	Yes
Itri5:85575725-85576225	TSS	Eif2ak4	Eif2ak4 Itri5:85575725-85576225			Promoter	Yes
Itri11:60361967-60362467	TSS	Eif2b3	Eif2b3 Itri11:60361967-60362467			Promoter	Yes
Itri11:60362513-60363013	TSS	Eif2b3	Eif2b3 Itri11:60362513-60363013	0.416708	4.78018e-21	Promoter	Yes
Itri11:60363074-60363574	TSS	Eif2b3	Eif2b3 Itri11:60363074-60363574			Promoter	No
Itri16:13149348-13149848	TSS	Eif3k	Eif3k Itri16:13149348-13149848			Promoter	Yes
Itri16:13149996-13150496	TSS	Eif3k	Eif3k Itri16:13149996-13150496			Promoter	Yes
Itri16:13150708-13151208	TSS	Eif3k	Eif3k Itri16:13150708-13151208			Promoter	No
Itri7:117132619-117133119	TSS	Eif4a2	Eif4a2 Itri7:117132619-117133119			Promoter	No
Itri10:43252280-43252780	TSS	EIF4A2-containing	EIF4A2-containing Itri10:43252280-43252780			Other	No
Itri4:62822597-62823097	TSS	Eif4b	Eif4b Itri4:62822597-62823097	0.303402	4.23935e-11	Promoter	Yes
Itri4:62823156-62823656	TSS	Eif4b	Eif4b Itri4:62823156-62823656	-0.405121	7.80161e-20	Promoter	Yes
Itri4:62823767-62824267	TSS	Eif4b	Eif4b Itri4:62823767-62824267			Promoter	No
Itri4:62824300-62824800	TSS	Eif4b	Eif4b Itri4:62824300-62824800			PEs	No
Itri7:101966081-101966581	TSS	Eif5a2	Eif5a2 Itri7:101966081-101966581			Promoter	Yes
Itri7:101966670-101967170	TSS	Eif5a2	Eif5a2 Itri7:101966670-101967170	0.507208	2.35625e-32	Promoter	Yes
Itri7:101967195-101967695	TSS	Eif5a2	Eif5a2 Itri7:101967195-101967695			Other	No
Itri12:79030199-79030699	TSS	Elmod3	Elmod3 Itri12:79030199-79030699			PEs	No
Itri12:79031058-79031558	TSS	Elmod3	Elmod3 Itri12:79031058-79031558			Promoter	Yes
Itri12:79031632-79032132	TSS	Elmod3	Elmod3 Itri12:79031632-79032132			Promoter	No
Itri12:79032195-79032695	TSS	Elmod3	Elmod3 Itri12:79032195-79032695			Promoter	No
Itri5:79427494-79427994	TSS	Emc4	Emc4 Itri5:79427494-79427994			Promoter	Yes
Itri5:79428128-79428628	TSS	Emc4	Emc4 Itri5:79428128-79428628			Promoter	Yes
Itri5:79428678-79429178	TSS	Emc4	Emc4 Itri5:79428678-79429178			Promoter	No
Itri7:55532994-55533494	TSS	Emc6	Emc6 Itri7:55532994-55533494			Promoter	Yes
Itri7:55533503-55534003	TSS	Emc6	Emc6 Itri7:55533503-55534003	0.330113	4.40219e-13	Promoter	Yes
Itri7:55534196-55534696	TSS	Emc6	Emc6 Itri7:55534196-55534696			Promoter	Yes
Itri16:26941320-26941820	TSS	Emc8	Emc8 Itri16:26941320-26941820			Promoter	No
Itri16:26942739-26943239	TSS	Emc8	Emc8 Itri16:26942739-26943239			Promoter	Yes
Itri9:104488200-104488700	TSS	Eme2	Eme2 Itri9:104488200-104488700			Promoter	Yes
Itri9:104488706-104489206	TSS	Eme2	Eme2 Itri9:104488706-104489206			Promoter	Yes
Itri9:104489612-104490112	TSS	Eme2	Eme2 Itri9:104489612-104490112			Promoter	No
Itri5:6583014-6583514	TSS	Eml1	Eml1 Itri5:6583014-6583514	0.263988	1.54575e-08	PEs	No
Itri5:6583716-6584216	TSS	Eml1	Eml1 Itri5:6583716-6584216	0.279148	1.79368e-09	PEs	Yes
Itri5:6584305-6584805	TSS	Eml1	Eml1 Itri5:6584305-6584805			PEs	Yes
Itri5:6584842-6585342	TSS	Eml1	Eml1 Itri5:6584842-6585342	0.342566	4.4338e-14	PEs	No
Itri3:10529743-10530243	TSS	Eml3	Eml3 Itri3:10529743-10530243	0.654299	4.01427e-60	Promoter	Yes
Itri3:10530393-10530893	TSS	Eml3	Eml3 Itri3:10530393-10530893	0.802819	1.06689e-110	Promoter	Yes
Itri3:10531196-10531696	TSS	Eml3	Eml3 Itri3:10531196-10531696	0.514956	1.71722e-33	Promoter	Yes
Itri3:10532094-10532594	TSS	Eml3	Eml3 Itri3:10532094-10532594			PEs	No
Itri12:38017380-38017880	TSS	Eml4	Eml4 Itri12:38017380-38017880			Promoter	Yes
Itri12:38017937-38018437	TSS	Eml4	Eml4 Itri12:38017937-38018437			Promoter	Yes
Itri12:38018634-38019134	TSS	Eml4	Eml4 Itri12:38018634-38019134			Promoter	Yes
Itri12:38019285-38019785	TSS	Eml4	Eml4 Itri12:38019285-38019785			Promoter	Yes
Itri12:38019799-38020299	TSS	Eml4	Eml4 Itri12:38019799-38020299			Other	No
Itri4:102244526-102245026	TSS	Eno2	Eno2 Itri4:102244526-102245026			Promoter	Yes
Itri4:102245119-102245619	TSS	Eno2	Eno2 Itri4:102245119-102245619			Promoter	Yes
Itri4:102246359-102246859	TSS	Eno2	Eno2 Itri4:102246359-102246859			Promoter	No
Itri11:21828037-21828537	TSS	Ensa	Ensa Itri11:21828037-21828537			Promoter	Yes
Itri11:21828786-21829286	TSS	Ensa	Ensa Itri11:21828786-21829286	-0.637619	3.44094e-56	Promoter	Yes
Itri11:21829390-21829890	TSS	Ensa	Ensa Itri11:21829390-21829890			Promoter	No
Itri19:1630101-1630601	TSS	EOGT-containing	EOGT-containing Itri19:1630101-1630601			Other	No
Itri19:1631740-1632240	TSS	EOGT-containing	EOGT-containing Itri19:1631740-1632240	0.525437	4.45174e-35	Other	No
Itri4:7767207-7767707	TSS	Ep300	Ep300 Itri4:7767207-7767707			Promoter	Yes
Itri4:7768451-7768951	TSS	Ep300	Ep300 Itri4:7768451-7768951	-0.430931	1.32762e-22	Promoter	Yes
Itri11:47091538-47092038	TSS	Epb41	Epb41 Itri11:47091538-47092038			Other	Yes
Itri11:47092086-47092586	TSS	Epb41	Epb41 Itri11:47092086-47092586			Promoter	Yes
Itri11:47092728-47093228	TSS	Epb41	Epb41 Itri11:47092728-47093228			Promoter	Yes
Itri5:173893916-173894416	TSS	Epb41l1	Epb41l1 Itri5:173893916-173894416	0.788264	5.562e-104	Promoter	Yes
Itri13:68249496-68249996	TSS	Epb41l3	Epb41l3 Itri13:68249496-68249996	0.564442	1.67215e-41	Promoter	Yes
Itri13:68250286-68250786	TSS	Epb41l3	Epb41l3 Itri13:68250286-68250786	0.446734	2.00967e-24	Promoter	Yes
Itri13:68250831-68251331	TSS	Epb41l3	Epb41l3 Itri13:68250831-68251331			Promoter	No
Itri13:68334588-68335088	TSS	EPB41L3-containing	EPB41L3-containing Itri13:68334588-68335088			Promoter	No
Itri13:68335367-68335867	TSS	EPB41L3-containing	EPB41L3-containing Itri13:68335367-68335867	0.251242	8.48591e-08	Promoter	No
Itri13:68336004-68336504	TSS	EPB41L3-containing	EPB41L3-containing Itri13:68336004-68336504			Other	No
Itri9:11550818-11551318	TSS	Epc1	Epc1 Itri9:11550818-11551318	0.462338	2.56181e-26	Promoter	Yes
Itri9:11551486-11551986	TSS	Epc1	Epc1 Itri9:11551486-11551986			Promoter	No
Itri2:193416828-193417328	TSS	Epm2aip1	Epm2aip1 Itri2:193416828-193417328			Promoter	Yes
Itri2:193417682-193418182	TSS	Epm2aip1	Epm2aip1 Itri2:193417682-193418182	0.331477	3.44124e-13	Promoter	Yes
Itri2:193418294-193418794	TSS	Epm2aip1	Epm2aip1 Itri2:193418294-193418794	0.353703	5.18776e-15	Promoter	Yes
Itri2:193418800-193419300	TSS	Epm2aip1	Epm2aip1 Itri2:193418800-193419300			Promoter	No
Itri7:60081379-60081879	TSS	Epn2	Epn2 Itri7:60081379-60081879			Other	No
Itri7:60082977-60083477	TSS	Epn2	Epn2 Itri7:60082977-60083477			Promoter	Yes
Itri7:60083480-60083980	TSS	Epn2	Epn2 Itri7:60083480-60083980			Promoter	Yes
Itri4:92057231-92057731	TSS	Eps8	Eps8 Itri4:92057231-92057731			Promoter	Yes
Itri4:92057737-92058237	TSS	Eps8	Eps8 Itri4:92057737-92058237			Promoter	Yes
Itri4:92058269-92058769	TSS	Eps8	Eps8 Itri4:92058269-92058769			Promoter	Yes
Itri4:92058773-92059273	TSS	Eps8	Eps8 Itri4:92058773-92059273			Promoter	Yes
Itri17:50266130-50266630	TSS	Erlin2	Erlin2 Itri17:50266130-50266630			PEs	No
Itri17:50266852-50267352	TSS	Erlin2	Erlin2 Itri17:50266852-50267352			Promoter	No
Itri17:50267353-50267853	TSS	Erlin2	Erlin2 Itri17:50267353-50267853			Promoter	Yes
Itri17:50267884-50268384	TSS	Erlin2	Erlin2 Itri17:50267884-50268384			Promoter	Yes
Itri17:50268585-50269085	TSS	Erlin2	Erlin2 Itri17:50268585-50269085			Other	No
Itri3:106965720-106966220	TSS	Esam	Esam Itri3:106965720-106966220	0.740891	2.33781e-85	PEs	Yes
Itri3:106966491-106966991	TSS	Esam	Esam Itri3:106966491-106966991	0.819531	3.88854e-119	PEs	Yes
Itri3:106967381-106967881	TSS	Esam	Esam Itri3:106967381-106967881	0.571661	8.65799e-43	PEs	Yes
Itri13:62498102-62498602	TSS	Esco1	Esco1 Itri13:62498102-62498602	0.288061	4.72928e-10	PEs	No
Itri13:62498975-62499475	TSS	Esco1	Esco1 Itri13:62498975-62499475	0.678146	3.34999e-66	Promoter	Yes
Itri13:62499497-62499997	TSS	Esco1	Esco1 Itri13:62499497-62499997	0.589089	4.96928e-46	Promoter	Yes
Itri5:157593000-157593500	TSS	Esf1	Esf1 Itri5:157593000-157593500			Promoter	No
Itri5:157593613-157594113	TSS	Esf1	Esf1 Itri5:157593613-157594113			Promoter	Yes
Itri1:203814245-203814745	TSS	Esm1	Esm1 Itri1:203814245-203814745			Other	No
Itri14:28148619-28149119	TSS	EXOC1	EXOC1 Itri14:28148619-28149119			Promoter	Yes
Itri14:28149377-28149877	TSS	EXOC1	EXOC1 Itri14:28149377-28149877	-0.441436	8.4042e-24	Promoter	Yes
Itri14:28149918-28150418	TSS	EXOC1	EXOC1 Itri14:28149918-28150418			Other	No
Itri3:197906323-197906823	TSS	Exosc2	Exosc2 Itri3:197906323-197906823			Other	No
Itri3:197906949-197907449	TSS	Exosc2	Exosc2 Itri3:197906949-197907449	0.646157	3.58316e-58	Promoter	No
Itri3:197907626-197908126	TSS	Exosc2	Exosc2 Itri3:197907626-197908126	0.708635	7.19526e-75	Promoter	No
Itri3:197908130-197908630	TSS	Exosc2	Exosc2 Itri3:197908130-197908630	0.594036	5.48375e-47	Promoter	Yes
Itri5:190947746-190948246	TSS	Eya2	Eya2 Itri5:190947746-190948246			Other	No
Itri5:190948258-190948758	TSS	Eya2	Eya2 Itri5:190948258-190948758	0.364197	6.33439e-16	Promoter	No
Itri20:4917120-4917620	TSS	EYA2-containing	EYA2-containing Itri20:4917120-4917620			Other	No
Itri11:28169183-28169683	TSS	Faap20	Faap20 Itri11:28169183-28169683			Promoter	Yes
Itri11:28169687-28170187	TSS	Faap20	Faap20 Itri11:28169687-28170187			Promoter	Yes
Itri11:28170213-28170713	TSS	Faap20	Faap20 Itri11:28170213-28170713			Promoter	No
Itri11:28170837-28171337	TSS	Faap20	Faap20 Itri11:28170837-28171337			Other	No
Itri11:48758298-48758798	TSS	Fabp3	Fabp3 Itri11:48758298-48758798			PEs	No
Itri11:48759073-48759573	TSS	Fabp3	Fabp3 Itri11:48759073-48759573			Promoter	No
Itri11:48759596-48760096	TSS	Fabp3	Fabp3 Itri11:48759596-48760096	0.301967	5.3472e-11	Promoter	Yes
Itri11:48760137-48760637	TSS	Fabp3	Fabp3 Itri11:48760137-48760637			Promoter	Yes
Itri9:104527438-104527938	TSS	Fahd1	Fahd1 Itri9:104527438-104527938			Promoter	No
Itri9:104527969-104528469	TSS	Fahd1	Fahd1 Itri9:104527969-104528469	0.532394	3.66475e-36	Promoter	Yes
Itri9:104528529-104529029	TSS	Fahd1	Fahd1 Itri9:104528529-104529029	0.50042	2.21267e-31	Promoter	Yes
Itri5:128698911-128699411	TSS	Fam103a1	Fam103a1 Itri5:128698911-128699411			Promoter	No
Itri5:128699524-128700024	TSS	Fam103a1	Fam103a1 Itri5:128699524-128700024	0.256505	4.2509e-08	Promoter	No
Itri5:128700162-128700662	TSS	Fam103a1	Fam103a1 Itri5:128700162-128700662			Promoter	No
Itri2:169299095-169299595	TSS	Fam107a	Fam107a Itri2:169299095-169299595	0.392422	1.46579e-18	Other	No
Itri2:169299620-169300120	TSS	Fam107a	Fam107a Itri2:169299620-169300120	0.494634	1.43402e-30	PEs	No
Itri2:169300293-169300793	TSS	Fam107a	Fam107a Itri2:169300293-169300793	0.798165	1.72505e-108	PEs	No
Itri12:14114310-14114810	TSS	Fam136a	Fam136a Itri12:14114310-14114810	0.426806	3.82161e-22	Promoter	Yes
Itri12:14114918-14115418	TSS	Fam136a	Fam136a Itri12:14114918-14115418	0.344245	3.22583e-14	Promoter	No
Itri12:14115463-14115963	TSS	Fam136a	Fam136a Itri12:14115463-14115963			Promoter	Yes
Itri1:195431248-195431748	TSS	Fam159b	Fam159b Itri1:195431248-195431748			Promoter	No
Itri12:21348489-21348989	TSS	Fam161a	Fam161a Itri12:21348489-21348989			PEs	No
Itri12:21349548-21350048	TSS	Fam161a	Fam161a Itri12:21349548-21350048	0.748802	3.54226e-88	Promoter	Yes
Itri12:21350437-21350937	TSS	Fam161a	Fam161a Itri12:21350437-21350937	0.712088	6.36205e-76	Promoter	Yes
Itri17:5416367-5416867	TSS	Fam167a	Fam167a Itri17:5416367-5416867			PEs	No
Itri17:5417196-5417696	TSS	Fam167a	Fam167a Itri17:5417196-5417696	0.27952	1.69818e-09	AEs	No
Itri17:5417755-5418255	TSS	Fam167a	Fam167a Itri17:5417755-5418255			Promoter	Yes
Itri17:5418762-5419262	TSS	Fam167a	Fam167a Itri17:5418762-5419262			Promoter	No
Itri9:112196749-112197249	TSS	Fam173a	Fam173a Itri9:112196749-112197249			Other	No
Itri1:10678347-10678847	TSS	Fam196a	Fam196a Itri1:10678347-10678847	0.595915	2.35061e-47	Promoter	No
Itri10:77431389-77431889	TSS	Fam199x	Fam199x Itri10:77431389-77431889			Promoter	Yes
Itri10:77432124-77432624	TSS	Fam199x	Fam199x Itri10:77432124-77432624	0.270027	6.66459e-09	Promoter	Yes
Itri9:92080234-92080734	TSS	Fam20b	Fam20b Itri9:92080234-92080734			PEs	No
Itri9:92080828-92081328	TSS	Fam20b	Fam20b Itri9:92080828-92081328	0.414506	8.19876e-21	Promoter	No
Itri1:51162897-51163397	TSS	Fam213a	Fam213a Itri1:51162897-51163397			Promoter	Yes
Itri1:51163626-51164126	TSS	Fam213a	Fam213a Itri1:51163626-51164126	0.523738	8.11798e-35	Promoter	No
Itri1:51164143-51164643	TSS	Fam213a	Fam213a Itri1:51164143-51164643			Promoter	No
Itri11:28466033-28466533	TSS	Fam213b	Fam213b Itri11:28466033-28466533			PEs	No
Itri5:96605253-96605753	TSS	Fam214a	Fam214a Itri5:96605253-96605753			Promoter	Yes
Itri5:96605809-96606309	TSS	Fam214a	Fam214a Itri5:96605809-96606309			Promoter	No
Itri5:96606397-96606897	TSS	Fam214a	Fam214a Itri5:96606397-96606897	0.311098	1.19376e-11	Promoter	Yes
Itri5:96607153-96607653	TSS	Fam214a	Fam214a Itri5:96607153-96607653			Promoter	Yes
Itri2:48396111-48396611	TSS	Fam3c	Fam3c Itri2:48396111-48396611			Promoter	Yes
Itri2:48396614-48397114	TSS	Fam3c	Fam3c Itri2:48396614-48397114			Promoter	Yes
Itri2:48397403-48397903	TSS	Fam3c	Fam3c Itri2:48397403-48397903			PEs	No
Itri12:56757189-56757689	TSS	Fam49a	Fam49a Itri12:56757189-56757689			AEs	No
Itri12:56758814-56759314	TSS	Fam49a	Fam49a Itri12:56758814-56759314			AEs	No
Itri12:56759373-56759873	TSS	Fam49a	Fam49a Itri12:56759373-56759873			AEs	No
Itri3:202207600-202208100	TSS	Fam69b	Fam69b Itri3:202207600-202208100			Promoter	No
Itri3:202208722-202209222	TSS	Fam69b	Fam69b Itri3:202208722-202209222			Promoter	No
Itri3:202209352-202209852	TSS	Fam69b	Fam69b Itri3:202209352-202209852			AEs	No
Itri3:7442712-7443212	TSS	FAM89B-like	FAM89B-like Itri3:7442712-7443212			Promoter	No
Itri12:70761300-70761800	TSS	Fam98a	Fam98a Itri12:70761300-70761800			Promoter	Yes
Itri12:70761855-70762355	TSS	Fam98a	Fam98a Itri12:70761855-70762355			Promoter	Yes
Itri12:70762557-70763057	TSS	Fam98a	Fam98a Itri12:70762557-70763057			PEs	No
Itri5:145384023-145384523	TSS	Fan1	Fan1 Itri5:145384023-145384523			Other	No
Itri5:145384588-145385088	TSS	Fan1	Fan1 Itri5:145384588-145385088			Promoter	No
Itri5:145385109-145385609	TSS	Fan1	Fan1 Itri5:145385109-145385609			Promoter	No
Itri8:92508567-92509067	TSS	Faxc	Faxc Itri8:92508567-92509067			Promoter	Yes
Itri8:92510219-92510719	TSS	Faxc	Faxc Itri8:92510219-92510719			PEs	No
Itri4:107376010-107376510	TSS	Fbxl14	Fbxl14 Itri4:107376010-107376510	0.549631	5.81708e-39	Promoter	Yes
Itri4:107377477-107377977	TSS	Fbxl14	Fbxl14 Itri4:107377477-107377977	-0.288608	4.35087e-10	Promoter	Yes
Itri4:107378008-107378508	TSS	Fbxl14	Fbxl14 Itri4:107378008-107378508			Promoter	Yes
Itri1:31845764-31846264	TSS	Fbxl15	Fbxl15 Itri1:31845764-31846264			Promoter	Yes
Itri1:31846689-31847189	TSS	Fbxl15	Fbxl15 Itri1:31846689-31847189	0.382742	1.2581e-17	Promoter	No
Itri1:31847260-31847760	TSS	Fbxl15	Fbxl15 Itri1:31847260-31847760			Other	No
Itri1:158432476-158432976	TSS	Fbxl17	Fbxl17 Itri1:158432476-158432976			Promoter	No
Itri1:158433022-158433522	TSS	Fbxl17	Fbxl17 Itri1:158433022-158433522			Promoter	No
Itri3:31075241-31075741	TSS	Fbxo3	Fbxo3 Itri3:31075241-31075741			Promoter	No
Itri3:31075885-31076385	TSS	Fbxo3	Fbxo3 Itri3:31075885-31076385			Promoter	Yes
Itri3:31076440-31076940	TSS	Fbxo3	Fbxo3 Itri3:31076440-31076940			Promoter	No
Itri1:158097971-158098471	TSS	Fer	Fer Itri1:158097971-158098471			Promoter	Yes
Itri1:158098562-158099062	TSS	Fer	Fer Itri1:158098562-158099062			Promoter	Yes
Itri1:158099108-158099608	TSS	Fer	Fer Itri1:158099108-158099608			Promoter	Yes
Itri12:42910551-42911051	TSS	Fez2	Fez2 Itri12:42910551-42911051	0.257629	3.65976e-08	Promoter	Yes
Itri12:42911139-42911639	TSS	Fez2	Fez2 Itri12:42911139-42911639			Promoter	Yes
Itri4:24795766-24796266	TSS	Fgd6	Fgd6 Itri4:24795766-24796266			Promoter	Yes
Itri4:24796441-24796941	TSS	Fgd6	Fgd6 Itri4:24796441-24796941	0.672357	1.12983e-64	Promoter	Yes
Itri4:24797075-24797575	TSS	Fgd6	Fgd6 Itri4:24797075-24797575			Promoter	No
Itri3:198092395-198092895	TSS	Fibcd1	Fibcd1 Itri3:198092395-198092895	0.380198	2.18704e-17	Other	Yes
Itri3:198093601-198094101	TSS	Fibcd1	Fibcd1 Itri3:198093601-198094101	0.513667	2.66872e-33	Promoter	Yes
Itri3:198094582-198095082	TSS	Fibcd1	Fibcd1 Itri3:198094582-198095082	0.546619	1.84359e-38	Promoter	Yes
Itri3:7209649-7210149	TSS	Fibp	Fibp Itri3:7209649-7210149			Other	No
Itri3:7210372-7210872	TSS	Fibp	Fibp Itri3:7210372-7210872			Promoter	Yes
Itri3:7210945-7211445	TSS	Fibp	Fibp Itri3:7210945-7211445			Promoter	No
Itri9:132913721-132914221	TSS	Fis1	Fis1 Itri9:132913721-132914221			Other	No
Itri9:132914423-132914923	TSS	Fis1	Fis1 Itri9:132914423-132914923			Promoter	Yes
Itri9:132915104-132915604	TSS	Fis1	Fis1 Itri9:132915104-132915604			Promoter	No
Itri5:80312691-80313191	TSS	Fmn1	Fmn1 Itri5:80312691-80313191	0.773029	1.68667e-97	Promoter	Yes
Itri5:80313494-80313994	TSS	Fmn1	Fmn1 Itri5:80313494-80313994	0.512415	4.08719e-33	PEs	No
Itri3:197374488-197374988	TSS	Fnbp1	Fnbp1 Itri3:197374488-197374988			Other	No
Itri11:49950766-49951266	TSS	Fndc5	Fndc5 Itri11:49950766-49951266			AEs	Yes
Itri11:49951805-49952305	TSS	Fndc5	Fndc5 Itri11:49951805-49952305			AEs	No
Itri11:49952460-49952960	TSS	Fndc5	Fndc5 Itri11:49952460-49952960			AEs	No
Itri7:460430-460930	TSS	Foxk2	Foxk2 Itri7:460430-460930	0.303709	4.03354e-11	AEs	No
Itri1:39681271-39681771	TSS	FRA10AC1-like	FRA10AC1-like Itri1:39681271-39681771			Promoter	Yes
Itri1:39681797-39682297	TSS	FRA10AC1-like	FRA10AC1-like Itri1:39681797-39682297			Promoter	Yes
Itri1:39682357-39682857	TSS	FRA10AC1-like	FRA10AC1-like Itri1:39682357-39682857			Promoter	Yes
Itri3:122606406-122606906	TSS	Frmd3	Frmd3 Itri3:122606406-122606906			PEs	No
Itri3:122607188-122607688	TSS	Frmd3	Frmd3 Itri3:122607188-122607688	0.663657	1.93332e-62	Promoter	Yes
Itri3:122607773-122608273	TSS	Frmd3	Frmd3 Itri3:122607773-122608273	0.38036	2.11212e-17	Promoter	Yes
Itri3:122608486-122608986	TSS	Frmd3	Frmd3 Itri3:122608486-122608986	0.370587	1.68986e-16	Promoter	Yes
Itri3:176505677-176506177	TSS	Fsd1l	Fsd1l Itri3:176505677-176506177			PEs	No
Itri3:176506821-176507321	TSS	Fsd1l	Fsd1l Itri3:176506821-176507321			Promoter	Yes
Itri3:11004844-11005344	TSS	Fth1	Fth1 Itri3:11004844-11005344			Promoter	Yes
Itri3:11005352-11005852	TSS	Fth1	Fth1 Itri3:11005352-11005852			Promoter	No
Itri8:129998411-129998911	TSS	Fuca2	Fuca2 Itri8:129998411-129998911			Promoter	No
Itri8:129999296-129999796	TSS	Fuca2	Fuca2 Itri8:129999296-129999796	0.497328	6.03148e-31	Promoter	Yes
Itri8:129999988-130000488	TSS	Fuca2	Fuca2 Itri8:129999988-130000488			PEs	No
Itri16:10506777-10507277	TSS	Fxyd3	Fxyd3 Itri16:10506777-10507277			AEs	Yes
Itri16:10507328-10507828	TSS	Fxyd3	Fxyd3 Itri16:10507328-10507828	0.261378	2.20812e-08	AEs	Yes
Itri16:10507873-10508373	TSS	Fxyd3	Fxyd3 Itri16:10507873-10508373	0.358206	2.12548e-15	AEs	No
Itri16:10508444-10508944	TSS	Fxyd3	Fxyd3 Itri16:10508444-10508944			AEs	No
Itri16:10509061-10509561	TSS	Fxyd3	Fxyd3 Itri16:10509061-10509561			AEs	No
Itri16:10537589-10538089	TSS	FXYD7	FXYD7 Itri16:10537589-10538089	-0.425225	5.70952e-22	PEs	No
Itri9:66187601-66188101	TSS	G0s2	G0s2 Itri9:66187601-66188101			Other	No
Itri9:66188210-66188710	TSS	G0s2	G0s2 Itri9:66188210-66188710	0.847251	2.8041e-135	Promoter	Yes
Itri9:66188783-66189283	TSS	G0s2	G0s2 Itri9:66188783-66189283	0.941373	9.57631e-232	PEs	Yes
Itri9:66189419-66189919	TSS	G0s2	G0s2 Itri9:66189419-66189919	0.740606	2.93701e-85	Other	No
Itri7:47061257-47061757	TSS	Gabarap	Gabarap Itri7:47061257-47061757			Promoter	Yes
Itri7:47061793-47062293	TSS	Gabarap	Gabarap Itri7:47061793-47062293	-0.31638	4.89135e-12	Promoter	Yes
Itri7:47062393-47062893	TSS	Gabarap	Gabarap Itri7:47062393-47062893	-0.279059	1.81717e-09	Promoter	Yes
Itri4:97239910-97240410	TSS	Gabarapl1	Gabarapl1 Itri4:97239910-97240410			Promoter	Yes
Itri4:97240481-97240981	TSS	Gabarapl1	Gabarapl1 Itri4:97240481-97240981			Promoter	Yes
Itri4:97241079-97241579	TSS	Gabarapl1	Gabarapl1 Itri4:97241079-97241579			Promoter	Yes
Itri4:97241604-97242104	TSS	Gabarapl1	Gabarapl1 Itri4:97241604-97242104			Promoter	Yes
Itri16:35349984-35350484	TSS	Gabarapl2	Gabarapl2 Itri16:35349984-35350484			Promoter	Yes
Itri16:35350704-35351204	TSS	Gabarapl2	Gabarapl2 Itri16:35350704-35351204	0.435188	4.39067e-23	Promoter	Yes
Itri16:35351481-35351981	TSS	Gabarapl2	Gabarapl2 Itri16:35351481-35351981			Other	Yes
Itri1:103408984-103409484	TSS	Gabra1	Gabra1 Itri1:103408984-103409484	0.42085	1.71329e-21	Promoter	No
Itri1:103409737-103410237	TSS	Gabra1	Gabra1 Itri1:103409737-103410237	0.646941	2.34006e-58	Promoter	Yes
Itri1:103410831-103411331	TSS	Gabra1	Gabra1 Itri1:103410831-103411331			PEs	No
Itri2:146000830-146001330	TSS	Gatc	Gatc Itri2:146000830-146001330			Promoter	No
Itri2:146001336-146001836	TSS	Gatc	Gatc Itri2:146001336-146001836			Promoter	Yes
Itri2:146001837-146002337	TSS	Gatc	Gatc Itri2:146001837-146002337	0.266687	1.06433e-08	Promoter	Yes
Itri2:146002462-146002962	TSS	Gatc	Gatc Itri2:146002462-146002962			Promoter	No
Itri9:120075570-120076070	TSS	Gga2	Gga2 Itri9:120075570-120076070	0.364942	5.43818e-16	Promoter	Yes
Itri9:120076680-120077180	TSS	Gga2	Gga2 Itri9:120076680-120077180	0.443104	5.3696e-24	Promoter	Yes
Itri9:120077243-120077743	TSS	Gga2	Gga2 Itri9:120077243-120077743			AEs	No
Itri9:40949826-40950326	TSS	Ggps1	Ggps1 Itri9:40949826-40950326			Promoter	No
Itri9:40950554-40951054	TSS	Ggps1	Ggps1 Itri9:40950554-40951054	0.696067	3.64943e-71	Promoter	Yes
Itri9:40951130-40951630	TSS	Ggps1	Ggps1 Itri9:40951130-40951630			Promoter	Yes
Itri2:124205208-124205708	TSS	Glt1d1	Glt1d1 Itri2:124205208-124205708	0.820965	6.67716e-120	PEs	No
Itri11:19020334-19020834	TSS	Gnat2	Gnat2 Itri11:19020334-19020834	0.945898	4.60734e-240	AEs	Yes
Itri11:19021315-19021815	TSS	Gnat2	Gnat2 Itri11:19021315-19021815	0.860948	1.71049e-144	AEs	No
Itri5:96152235-96152735	TSS	Gnb5	Gnb5 Itri5:96152235-96152735	0.713	3.33162e-76	Other	No
Itri5:96153485-96153985	TSS	Gnb5	Gnb5 Itri5:96153485-96153985	0.933043	4.68552e-218	PEs	Yes
Itri5:96154146-96154646	TSS	Gnb5	Gnb5 Itri5:96154146-96154646			Other	No
Itri9:112131884-112132384	TSS	Gng13	Gng13 Itri9:112131884-112132384			PEs	No
Itri9:112132428-112132928	TSS	Gng13	Gng13 Itri9:112132428-112132928			PEs	Yes
Itri9:112133307-112133807	TSS	Gng13	Gng13 Itri9:112133307-112133807			Other	No
Itri3:10452707-10453207	TSS	Gng3	Gng3 Itri3:10452707-10453207			Promoter	No
Itri3:10453554-10454054	TSS	Gng3	Gng3 Itri3:10453554-10454054			Promoter	Yes
Itri3:10454132-10454632	TSS	Gng3	Gng3 Itri3:10454132-10454632			Promoter	No
Itri3:10454664-10455164	TSS	Gng3	Gng3 Itri3:10454664-10455164	0.484343	3.64767e-29	Promoter	Yes
Itri1:150607546-150608046	TSS	Gnpda1	Gnpda1 Itri1:150607546-150608046			Promoter	Yes
Itri1:150608298-150608798	TSS	Gnpda1	Gnpda1 Itri1:150608298-150608798	0.341284	5.64409e-14	Promoter	Yes
Itri5:76304025-76304525	TSS	Gnpnat1	Gnpnat1 Itri5:76304025-76304525			PEs	No
Itri3:196045573-196046073	TSS	Golga2	Golga2 Itri3:196045573-196046073	0.30358	4.11879e-11	Promoter	Yes
Itri3:196046135-196046635	TSS	Golga2	Golga2 Itri3:196046135-196046635	0.45938	5.96279e-26	Promoter	Yes
Itri3:196046674-196047174	TSS	Golga2	Golga2 Itri3:196046674-196047174			Promoter	Yes
Itri2:193602227-193602727	TSS	Golga4	Golga4 Itri2:193602227-193602727			Promoter	No
Itri2:193602829-193603329	TSS	Golga4	Golga4 Itri2:193602829-193603329	0.685318	3.82245e-68	Promoter	Yes
Itri2:193603368-193603868	TSS	Golga4	Golga4 Itri2:193603368-193603868	0.521336	1.88767e-34	Promoter	Yes
Itri17:47132748-47133248	TSS	Golga7	Golga7 Itri17:47132748-47133248	0.26981	6.87143e-09	Promoter	No
Itri17:47133299-47133799	TSS	Golga7	Golga7 Itri17:47133299-47133799			Promoter	Yes
Itri17:47133800-47134300	TSS	Golga7	Golga7 Itri17:47133800-47134300			Promoter	Yes
Itri8:108548412-108548912	TSS	Gopc	Gopc Itri8:108548412-108548912			Promoter	Yes
Itri8:108548934-108549434	TSS	Gopc	Gopc Itri8:108548934-108549434	0.497068	6.55926e-31	Promoter	Yes
Itri8:108550001-108550501	TSS	Gopc	Gopc Itri8:108550001-108550501			PEs	Yes
Itri4:155218450-155218950	TSS	Gpalpp1	Gpalpp1 Itri4:155218450-155218950			Promoter	Yes
Itri4:155218973-155219473	TSS	Gpalpp1	Gpalpp1 Itri4:155218973-155219473			Promoter	Yes
Itri12:42510864-42511364	TSS	Gpatch11	Gpatch11 Itri12:42510864-42511364			Promoter	No
Itri12:42511499-42511999	TSS	Gpatch11	Gpatch11 Itri12:42511499-42511999	-0.27712	2.41158e-09	Promoter	Yes
Itri12:42512636-42513136	TSS	Gpatch11	Gpatch11 Itri12:42512636-42513136			PEs	No
Itri9:58995763-58996263	TSS	Gpatch2	Gpatch2 Itri9:58995763-58996263			Promoter	No
Itri9:58996293-58996793	TSS	Gpatch2	Gpatch2 Itri9:58996293-58996793			Promoter	Yes
Itri5:26914261-26914761	TSS	Gpatch2l	Gpatch2l Itri5:26914261-26914761			Promoter	Yes
Itri5:26914859-26915359	TSS	Gpatch2l	Gpatch2l Itri5:26914859-26915359			Promoter	Yes
Itri5:26915438-26915938	TSS	Gpatch2l	Gpatch2l Itri5:26915438-26915938			Other	No
Itri17:26231847-26232347	TSS	Gpm6a	Gpm6a Itri17:26231847-26232347			Promoter	Yes
Itri17:26232647-26233147	TSS	Gpm6a	Gpm6a Itri17:26232647-26233147			Promoter	Yes
Itri2:156041984-156042484	TSS	Gpn3	Gpn3 Itri2:156041984-156042484			Promoter	No
Itri2:156042662-156043162	TSS	Gpn3	Gpn3 Itri2:156042662-156043162			Promoter	No
Itri2:156043508-156044008	TSS	Gpn3	Gpn3 Itri2:156043508-156044008			Promoter	Yes
Itri9:100249883-100250383	TSS	Gpr161	Gpr161 Itri9:100249883-100250383	0.396398	5.93244e-19	Promoter	No
Itri9:100251189-100251689	TSS	Gpr161	Gpr161 Itri9:100251189-100251689			Promoter	No
Itri9:100251888-100252388	TSS	Gpr161	Gpr161 Itri9:100251888-100252388			Other	No
Itri7:851440-851940	TSS	Gps1	Gps1 Itri7:851440-851940			Other	No
Itri7:64237924-64238424	TSS	Gpx1	Gpx1 Itri7:64237924-64238424			Promoter	Yes
Itri7:64238474-64238974	TSS	Gpx1	Gpx1 Itri7:64238474-64238974	0.357752	2.32716e-15	Promoter	Yes
Itri7:64239072-64239572	TSS	Gpx1	Gpx1 Itri7:64239072-64239572			Other	No
Itri2:217328129-217328629	TSS	Gpx4	Gpx4 Itri2:217328129-217328629	0.524485	6.2366e-35	Promoter	No
Itri2:217328630-217329130	TSS	Gpx4	Gpx4 Itri2:217328630-217329130	0.79739	3.96711e-108	Promoter	Yes
Itri2:217329683-217330183	TSS	Gpx4	Gpx4 Itri2:217329683-217330183			PEs	No
Itri7:5750629-5751129	TSS	Grb2	Grb2 Itri7:5750629-5751129			Promoter	Yes
Itri7:5751427-5751927	TSS	Grb2	Grb2 Itri7:5751427-5751927			Promoter	No
Itri15:35745241-35745741	TSS	Gria2	Gria2 Itri15:35745241-35745741	0.365193	5.16636e-16	Promoter	Yes
Itri15:35746303-35746803	TSS	Gria2	Gria2 Itri15:35746303-35746803	0.30071	6.5461e-11	Promoter	Yes
Itri15:35746956-35747456	TSS	Gria2	Gria2 Itri15:35746956-35747456			PEs	Yes
Itri15:26325923-26326423	TSS	Grid2	Grid2 Itri15:26325923-26326423	0.632614	4.66932e-55	Promoter	No
Itri15:26326910-26327410	TSS	Grid2	Grid2 Itri15:26326910-26327410	0.715068	7.62333e-77	Promoter	Yes
Itri15:26327553-26328053	TSS	Grid2	Grid2 Itri15:26327553-26328053			PEs	No
Itri15:26326910-26327410	TSS	GRID2	GRID2 Itri15:26326910-26327410	0.338869	8.8619e-14	Promoter	Yes
Itri15:26327553-26328053	TSS	GRID2	GRID2 Itri15:26327553-26328053			PEs	No
Itri14:66965704-66966204	TSS	Grk4	Grk4 Itri14:66965704-66966204			Promoter	No
Itri14:66967439-66967939	TSS	Grk4	Grk4 Itri14:66967439-66967939			Promoter	No
Itri4:195598478-195598978	TSS	Grtp1	Grtp1 Itri4:195598478-195598978	0.643677	1.36998e-57	Promoter	No
Itri4:195599215-195599715	TSS	Grtp1	Grtp1 Itri4:195599215-195599715	0.626025	1.34916e-53	Promoter	Yes
Itri4:195599797-195600297	TSS	Grtp1	Grtp1 Itri4:195599797-195600297	0.793323	2.95641e-106	Promoter	Yes
Itri4:94508947-94509447	TSS	Gsg1	Gsg1 Itri4:94508947-94509447			PEs	No
Itri4:94509914-94510414	TSS	Gsg1	Gsg1 Itri4:94509914-94510414			PEs	No
Itri4:94510631-94511131	TSS	Gsg1	Gsg1 Itri4:94510631-94511131			Other	No
Itri9:111817906-111818406	TSS	Gspt1	Gspt1 Itri9:111817906-111818406	-0.318711	3.28057e-12	Promoter	Yes
Itri9:111818604-111819104	TSS	Gspt1	Gspt1 Itri9:111818604-111819104			Promoter	Yes
Itri11:18904875-18905375	TSS	GSTM2-containing	GSTM2-containing Itri11:18904875-18905375			PEs	Yes
Itri11:18905558-18906058	TSS	GSTM2-containing	GSTM2-containing Itri11:18905558-18906058			PEs	Yes
Itri11:18933490-18933990	TSS	GSTM2-like	GSTM2-like Itri11:18933490-18933990			PEs	No
Itri11:18934052-18934552	TSS	GSTM2-like	GSTM2-like Itri11:18934052-18934552	0.581698	1.24491e-44	Promoter	Yes
Itri11:18934563-18935063	TSS	GSTM2-like	GSTM2-like Itri11:18934563-18935063	0.597324	1.24062e-47	Promoter	No
Itri11:18876515-18877015	TSS	Gstm3	Gstm3 Itri11:18876515-18877015			PEs	No
Itri11:18877130-18877630	TSS	Gstm3	Gstm3 Itri11:18877130-18877630	-0.385651	6.6441e-18	Promoter	No
Itri11:18877868-18878368	TSS	Gstm3	Gstm3 Itri11:18877868-18878368	0.407099	4.88223e-20	Promoter	No
Itri11:18970196-18970696	TSS	Gstm4	Gstm4 Itri11:18970196-18970696			AEs	No
Itri11:18970955-18971455	TSS	Gstm4	Gstm4 Itri11:18970955-18971455	0.266694	1.06327e-08	Promoter	No
Itri11:18971549-18972049	TSS	Gstm4	Gstm4 Itri11:18971549-18972049			Promoter	No
Itri11:18921626-18922126	TSS	GSTM4-like	GSTM4-like Itri11:18921626-18922126			Other	No
Itri11:18922647-18923147	TSS	GSTM4-like	GSTM4-like Itri11:18922647-18923147	0.415234	6.86251e-21	Other	No
Itri1:30339231-30339731	TSS	Gsto1	Gsto1 Itri1:30339231-30339731			Promoter	Yes
Itri1:30339937-30340437	TSS	Gsto1	Gsto1 Itri1:30339937-30340437			PEs	No
Itri3:5757384-5757884	TSS	Gstp1	Gstp1 Itri3:5757384-5757884			Promoter	Yes
Itri3:5757911-5758411	TSS	Gstp1	Gstp1 Itri3:5757911-5758411			Promoter	Yes
Itri3:5758905-5759405	TSS	Gstp1	Gstp1 Itri3:5758905-5759405	0.663356	2.30344e-62	AEs	No
Itri5:102803814-102804314	TSS	Gtf2a2	Gtf2a2 Itri5:102803814-102804314	0.442495	6.32723e-24	Promoter	Yes
Itri5:102804327-102804827	TSS	Gtf2a2	Gtf2a2 Itri5:102804327-102804827			Other	No
Itri9:123090247-123090747	TSS	Gtf3c1	Gtf3c1 Itri9:123090247-123090747	0.707929	1.17407e-74	Promoter	No
Itri9:123090751-123091251	TSS	Gtf3c1	Gtf3c1 Itri9:123090751-123091251			Promoter	No
Itri9:123091380-123091880	TSS	Gtf3c1	Gtf3c1 Itri9:123091380-123091880	0.60722	1.27717e-49	Promoter	Yes
Itri9:123091953-123092453	TSS	Gtf3c1	Gtf3c1 Itri9:123091953-123092453			Promoter	No
Itri8:102443013-102443513	TSS	Gtf3c6	Gtf3c6 Itri8:102443013-102443513			Promoter	No
Itri8:46258773-46259273	TSS	Guca1a	Guca1a Itri8:46258773-46259273	0.926438	1.70936e-208	Other	Yes
Itri8:46259846-46260346	TSS	Guca1a	Guca1a Itri8:46259846-46260346	0.825069	3.93094e-122	Other	No
Itri7:127705545-127706045	TSS	Hacd2	Hacd2 Itri7:127705545-127706045			Other	No
Itri7:127706050-127706550	TSS	Hacd2	Hacd2 Itri7:127706050-127706550	-0.313628	7.80514e-12	Promoter	Yes
Itri7:127706656-127707156	TSS	Hacd2	Hacd2 Itri7:127706656-127707156			Promoter	Yes
Itri16:40319285-40319785	TSS	Has3	Has3 Itri16:40319285-40319785			Other	No
Itri5:87978077-87978577	TSS	Haus2	Haus2 Itri5:87978077-87978577			Promoter	No
Itri5:87978657-87979157	TSS	Haus2	Haus2 Itri5:87978657-87979157			Promoter	No
Itri5:87979190-87979690	TSS	Haus2	Haus2 Itri5:87979190-87979690			Promoter	No
Itri11:24930085-24930585	TSS	Hax1	Hax1 Itri11:24930085-24930585			Promoter	No
Itri11:24930665-24931165	TSS	Hax1	Hax1 Itri11:24930665-24931165			Promoter	Yes
Itri11:24931268-24931768	TSS	Hax1	Hax1 Itri11:24931268-24931768			Promoter	Yes
Itri11:24931861-24932361	TSS	Hax1	Hax1 Itri11:24931861-24932361			Promoter	Yes
Itri2:76722914-76723414	TSS	Hdac9	Hdac9 Itri2:76722914-76723414			Promoter	No
Itri2:76723508-76724008	TSS	Hdac9	Hdac9 Itri2:76723508-76724008			Promoter	No
Itri6:192663304-192663804	TSS	Hdlbp	Hdlbp Itri6:192663304-192663804			Promoter	Yes
Itri6:192663826-192664326	TSS	Hdlbp	Hdlbp Itri6:192663826-192664326			Promoter	Yes
Itri6:192664343-192664843	TSS	Hdlbp	Hdlbp Itri6:192664343-192664843	0.253316	6.47511e-08	Promoter	Yes
Itri6:192665233-192665733	TSS	Hdlbp	Hdlbp Itri6:192665233-192665733	0.298563	9.21987e-11	Promoter	No
Itri4:94622359-94622859	TSS	Hebp1	Hebp1 Itri4:94622359-94622859			Other	No
Itri4:94623140-94623640	TSS	Hebp1	Hebp1 Itri4:94623140-94623640			Promoter	Yes
Itri4:94623740-94624240	TSS	Hebp1	Hebp1 Itri4:94623740-94624240			Other	No
Itri6:154132722-154133222	TSS	Hecw2	Hecw2 Itri6:154132722-154133222			PEs	No
Itri7:126352302-126352802	TSS	Heg1	Heg1 Itri7:126352302-126352802	0.305845	2.84674e-11	Promoter	No
Itri7:126354212-126354712	TSS	Heg1	Heg1 Itri7:126354212-126354712	0.463652	1.75619e-26	Promoter	No
Itri5:120570841-120571341	TSS	Herc2	Herc2 Itri5:120570841-120571341	-0.281752	1.22139e-09	Promoter	Yes
Itri5:120571455-120571955	TSS	Herc2	Herc2 Itri5:120571455-120571955			Promoter	Yes
Itri6:634008-634508	TSS	Hgh1	Hgh1 Itri6:634008-634508			Promoter	Yes
Itri6:634704-635204	TSS	Hgh1	Hgh1 Itri6:634704-635204			Promoter	Yes
Itri6:635322-635822	TSS	Hgh1	Hgh1 Itri6:635322-635822			Promoter	No
Itri5:68420116-68420616	TSS	Hif1a	Hif1a Itri5:68420116-68420616			Promoter	Yes
Itri5:68420768-68421268	TSS	Hif1a	Hif1a Itri5:68420768-68421268	-0.415853	5.89661e-21	Promoter	Yes
Itri5:68421666-68422166	TSS	Hif1a	Hif1a Itri5:68421666-68422166			AEs	No
Itri3:101150247-101150747	TSS	Hinfp	Hinfp Itri3:101150247-101150747			PEs	No
Itri3:101150804-101151304	TSS	Hinfp	Hinfp Itri3:101150804-101151304			Promoter	No
Itri3:101151372-101151872	TSS	Hinfp	Hinfp Itri3:101151372-101151872			Promoter	Yes
Itri3:101151916-101152416	TSS	Hinfp	Hinfp Itri3:101151916-101152416			Promoter	No
Itri3:101152539-101153039	TSS	Hinfp	Hinfp Itri3:101152539-101153039			Promoter	No
Itri11:15183757-15184257	TSS	Hipk1	Hipk1 Itri11:15183757-15184257			Promoter	No
Itri11:15184320-15184820	TSS	Hipk1	Hipk1 Itri11:15184320-15184820			Promoter	Yes
Itri2:15284239-15284739	TSS	Hipk2	Hipk2 Itri2:15284239-15284739			Other	No
Itri2:15284942-15285442	TSS	Hipk2	Hipk2 Itri2:15284942-15285442			Other	No
Itri2:15286388-15286888	TSS	Hipk2	Hipk2 Itri2:15286388-15286888			Other	No
Itri8:1655208-1655708	TSS	HIST1H2BC-containing	HIST1H2BC-containing Itri8:1655208-1655708	0.600571	2.81416e-48	Promoter	Yes
Itri8:1655715-1656215	TSS	HIST1H2BC-containing	HIST1H2BC-containing Itri8:1655715-1656215	0.616326	1.63599e-51	Promoter	Yes
Itri8:1656526-1657026	TSS	HIST1H2BC-containing	HIST1H2BC-containing Itri8:1656526-1657026	0.552562	1.87062e-39	Promoter	Yes
Itri7:83201178-83201678	TSS	Hltf	Hltf Itri7:83201178-83201678			Promoter	No
Itri7:83201785-83202285	TSS	Hltf	Hltf Itri7:83201785-83202285			Promoter	Yes
Itri7:83202345-83202845	TSS	Hltf	Hltf Itri7:83202345-83202845	0.31687	4.49839e-12	Promoter	Yes
Itri7:83202991-83203491	TSS	Hltf	Hltf Itri7:83202991-83203491			Other	No
Itri1:125688866-125689366	TSS	Hnrnpa0	Hnrnpa0 Itri1:125688866-125689366			Promoter	Yes
Itri1:125689451-125689951	TSS	Hnrnpa0	Hnrnpa0 Itri1:125689451-125689951	-0.274103	3.73063e-09	Promoter	Yes
Itri1:125689960-125690460	TSS	Hnrnpa0	Hnrnpa0 Itri1:125689960-125690460	-0.420927	1.68081e-21	Promoter	Yes
Itri1:125690576-125691076	TSS	Hnrnpa0	Hnrnpa0 Itri1:125690576-125691076	-0.256094	4.48891e-08	Promoter	Yes
Itri1:125691181-125691681	TSS	Hnrnpa0	Hnrnpa0 Itri1:125691181-125691681			Promoter	No
Itri4:61682776-61683276	TSS	Hnrnpa1	Hnrnpa1 Itri4:61682776-61683276	0.311772	1.06661e-11	Promoter	Yes
Itri4:61683379-61683879	TSS	Hnrnpa1	Hnrnpa1 Itri4:61683379-61683879	-0.548227	9.96855e-39	Promoter	Yes
Itri4:61684162-61684662	TSS	Hnrnpa1	Hnrnpa1 Itri4:61684162-61684662	-0.388483	3.54737e-18	Promoter	Yes
Itri17:45935555-45936055	TSS	Hook3	Hook3 Itri17:45935555-45936055			Promoter	No
Itri17:45936260-45936760	TSS	Hook3	Hook3 Itri17:45936260-45936760	-0.261864	2.06674e-08	Promoter	Yes
Itri17:45936810-45937310	TSS	Hook3	Hook3 Itri17:45936810-45937310	-0.672069	1.34421e-64	Promoter	Yes
Itri17:45937324-45937824	TSS	Hook3	Hook3 Itri17:45937324-45937824			Promoter	No
Itri11:40875027-40875527	TSS	Hp1bp3	Hp1bp3 Itri11:40875027-40875527			Other	No
Itri11:49960146-49960646	TSS	Hpca	Hpca Itri11:49960146-49960646			AEs	Yes
Itri11:49961243-49961743	TSS	Hpca	Hpca Itri11:49961243-49961743	0.692437	3.95377e-70	Promoter	Yes
Itri11:49962181-49962681	TSS	Hpca	Hpca Itri11:49962181-49962681			Promoter	Yes
Itri12:51726858-51727358	TSS	Hpcal1	Hpcal1 Itri12:51726858-51727358			Other	Yes
Itri12:51727422-51727922	TSS	Hpcal1	Hpcal1 Itri12:51727422-51727922	0.612045	1.2935e-50	Promoter	Yes
Itri12:51728315-51728815	TSS	Hpcal1	Hpcal1 Itri12:51728315-51728815	0.763545	1.0233e-93	Promoter	Yes
Itri7:122826370-122826870	TSS	Hrasls	Hrasls Itri7:122826370-122826870	0.257992	3.48591e-08	PEs	No
Itri7:122826937-122827437	TSS	Hrasls	Hrasls Itri7:122826937-122827437	0.47199	1.53528e-27	Promoter	Yes
Itri7:122827554-122828054	TSS	Hrasls	Hrasls Itri7:122827554-122828054			PEs	No
Itri7:56975546-56976046	TSS	Hs3st3b1	Hs3st3b1 Itri7:56975546-56976046			PEs	No
Itri7:56976074-56976574	TSS	Hs3st3b1	Hs3st3b1 Itri7:56976074-56976574	0.614737	3.53993e-51	Promoter	Yes
Itri7:56976854-56977354	TSS	Hs3st3b1	Hs3st3b1 Itri7:56976854-56977354			Promoter	Yes
Itri7:56977391-56977891	TSS	Hs3st3b1	Hs3st3b1 Itri7:56977391-56977891			Promoter	Yes
Itri6:523776-524276	TSS	Hsf1	Hsf1 Itri6:523776-524276			Promoter	No
Itri6:524534-525034	TSS	Hsf1	Hsf1 Itri6:524534-525034			Promoter	Yes
Itri6:525184-525684	TSS	Hsf1	Hsf1 Itri6:525184-525684			Promoter	No
Itri8:112677881-112678381	TSS	Hsf2	Hsf2 Itri8:112677881-112678381			PEs	No
Itri8:112678420-112678920	TSS	Hsf2	Hsf2 Itri8:112678420-112678920			PEs	No
Itri8:112679899-112680399	TSS	Hsf2	Hsf2 Itri8:112679899-112680399			Other	No
Itri7:119290229-119290729	TSS	HSF2	HSF2 Itri7:119290229-119290729			Other	No
Itri8:35824933-35825433	TSS	Hspa1a	Hspa1a Itri8:35824933-35825433			Promoter	Yes
Itri8:35825538-35826038	TSS	Hspa1a	Hspa1a Itri8:35825538-35826038			Promoter	No
Itri8:35839201-35839701	TSS	Hspa1b	Hspa1b Itri8:35839201-35839701	0.281413	1.28435e-09	Promoter	Yes
Itri5:89011620-89012120	TSS	Hypk	Hypk Itri5:89011620-89012120	0.655408	2.15662e-60	AEs	No
Itri5:89012145-89012645	TSS	Hypk	Hypk Itri5:89012145-89012645	0.703499	2.48293e-73	Promoter	No
Itri5:89012687-89013187	TSS	Hypk	Hypk Itri5:89012687-89013187	0.285506	6.96481e-10	Promoter	No
Itri5:89013188-89013688	TSS	Hypk	Hypk Itri5:89013188-89013688			Promoter	No
Itri12:51098312-51098812	TSS	Iah1	Iah1 Itri12:51098312-51098812			Promoter	No
Itri8:82147323-82147823	TSS	IAH1-like	IAH1-like Itri8:82147323-82147823			Other	No
Itri13:7730944-7731444	TSS	Iars	Iars Itri13:7730944-7731444			Promoter	No
Itri13:7731784-7732284	TSS	Iars	Iars Itri13:7731784-7732284	0.266239	1.13261e-08	Promoter	No
Itri13:7732566-7733066	TSS	Iars	Iars Itri13:7732566-7733066			Other	No
Itri1:241153927-241154427	TSS	Ice1	Ice1 Itri1:241153927-241154427			Promoter	No
Itri1:241154445-241154945	TSS	Ice1	Ice1 Itri1:241154445-241154945			Promoter	Yes
Itri1:241155092-241155592	TSS	Ice1	Ice1 Itri1:241155092-241155592			Promoter	No
Itri1:241156013-241156513	TSS	Ice1	Ice1 Itri1:241156013-241156513			Promoter	No
Itri5:180301703-180302203	TSS	Ift52	Ift52 Itri5:180301703-180302203			Promoter	No
Itri5:180302523-180303023	TSS	Ift52	Ift52 Itri5:180302523-180303023			Promoter	No
Itri5:180303131-180303631	TSS	Ift52	Ift52 Itri5:180303131-180303631			Promoter	No
Itri14:27110319-27110819	TSS	Igfbp7	Igfbp7 Itri14:27110319-27110819			PEs	No
Itri14:27111562-27112062	TSS	Igfbp7	Igfbp7 Itri14:27111562-27112062			Promoter	Yes
Itri14:27112075-27112575	TSS	Igfbp7	Igfbp7 Itri14:27112075-27112575			Promoter	No
Itri3:169561323-169561823	TSS	Igfbpl1	Igfbpl1 Itri3:169561323-169561823			Other	Yes
Itri11:39044146-39044646	TSS	Igsf21	Igsf21 Itri11:39044146-39044646			PEs	Yes
Itri11:39044812-39045312	TSS	Igsf21	Igsf21 Itri11:39044812-39045312			Other	No
Itri11:38921097-38921597	TSS	IGSF21-containing	IGSF21-containing Itri11:38921097-38921597			Other	No
Itri11:38922090-38922590	TSS	IGSF21-containing	IGSF21-containing Itri11:38922090-38922590			AEs	Yes
Itri11:38922673-38923173	TSS	IGSF21-containing	IGSF21-containing Itri11:38922673-38923173			AEs	No
Itri11:6084373-6084873	TSS	Igsf9	Igsf9 Itri11:6084373-6084873	0.338824	8.93649e-14	Promoter	Yes
Itri11:6085251-6085751	TSS	Igsf9	Igsf9 Itri11:6085251-6085751	0.667957	1.55782e-63	Promoter	Yes
Itri11:6086114-6086614	TSS	Igsf9	Igsf9 Itri11:6086114-6086614			PEs	No
Itri1:202930507-202931007	TSS	Il6st	Il6st Itri1:202930507-202931007			Promoter	Yes
Itri1:202931067-202931567	TSS	Il6st	Il6st Itri1:202931067-202931567			Promoter	Yes
Itri1:202931665-202932165	TSS	Il6st	Il6st Itri1:202931665-202932165			Promoter	No
Itri13:60048983-60049483	TSS	Impact	Impact Itri13:60048983-60049483			PEs	No
Itri13:60050008-60050508	TSS	Impact	Impact Itri13:60050008-60050508	-0.364938	5.44305e-16	Promoter	No
Itri13:60050743-60051243	TSS	Impact	Impact Itri13:60050743-60051243			PEs	No
Itri5:42529720-42530220	TSS	IMPACT-containing	IMPACT-containing Itri5:42529720-42530220			Other	No
Itri8:73019597-73020097	TSS	Impg1	Impg1 Itri8:73019597-73020097	0.823047	5.0297e-121	Other	Yes
Itri1:31155888-31156388	TSS	Ina	Ina Itri1:31155888-31156388	0.309073	1.6724e-11	Promoter	Yes
Itri1:31156532-31157032	TSS	Ina	Ina Itri1:31156532-31157032	0.488755	9.23667e-30	Promoter	Yes
Itri1:31157107-31157607	TSS	Ina	Ina Itri1:31157107-31157607	0.548155	1.02466e-38	Promoter	Yes
Itri1:31157622-31158122	TSS	Ina	Ina Itri1:31157622-31158122			PEs	No
Itri6:91426812-91427312	TSS	Inhbb	Inhbb Itri6:91426812-91427312	0.428825	2.28181e-22	Promoter	Yes
Itri13:50304523-50305023	TSS	Ino80c	Ino80c Itri13:50304523-50305023			Other	No
Itri13:50305079-50305579	TSS	Ino80c	Ino80c Itri13:50305079-50305579			Promoter	No
Itri13:50305677-50306177	TSS	Ino80c	Ino80c Itri13:50305677-50306177			Promoter	Yes
Itri15:47988968-47989468	TSS	Inpp4b	Inpp4b Itri15:47988968-47989468			Promoter	Yes
Itri15:47989472-47989972	TSS	Inpp4b	Inpp4b Itri15:47989472-47989972			Promoter	Yes
Itri15:47990330-47990830	TSS	Inpp4b	Inpp4b Itri15:47990330-47990830			Promoter	Yes
Itri1:16381708-16382208	TSS	Inpp5f	Inpp5f Itri1:16381708-16382208			Promoter	No
Itri1:16382425-16382925	TSS	Inpp5f	Inpp5f Itri1:16382425-16382925			Promoter	No
Itri1:16382944-16383444	TSS	Inpp5f	Inpp5f Itri1:16382944-16383444			Promoter	No
Itri1:16438152-16438652	TSS	INPP5F	INPP5F Itri1:16438152-16438652	-0.350244	1.01975e-14	Other	No
Itri5:118752507-118753007	TSS	Ireb2	Ireb2 Itri5:118752507-118753007			Promoter	Yes
Itri5:118753149-118753649	TSS	Ireb2	Ireb2 Itri5:118753149-118753649			Promoter	No
Itri5:118753668-118754168	TSS	Ireb2	Ireb2 Itri5:118753668-118754168	0.370325	1.78485e-16	Promoter	No
Itri5:118754254-118754754	TSS	Ireb2	Ireb2 Itri5:118754254-118754754			PEs	No
Itri16:51922941-51923441	TSS	Irx6	Irx6 Itri16:51922941-51923441	0.460894	3.87414e-26	Promoter	No
Itri16:51923468-51923968	TSS	Irx6	Irx6 Itri16:51923468-51923968	0.544084	4.8228e-38	Promoter	Yes
Itri16:51924487-51924987	TSS	Irx6	Irx6 Itri16:51924487-51924987	0.54154	1.25468e-37	Promoter	Yes
Itri16:51925052-51925552	TSS	Irx6	Irx6 Itri16:51925052-51925552	0.363372	7.49458e-16	PEs	No
Itri3:120047961-120048461	TSS	Isca1	Isca1 Itri3:120047961-120048461			Promoter	No
Itri3:120048490-120048990	TSS	Isca1	Isca1 Itri3:120048490-120048990	0.772622	2.47314e-97	Promoter	Yes
Itri3:120049003-120049503	TSS	Isca1	Isca1 Itri3:120049003-120049503	0.645444	5.27223e-58	Promoter	No
Itri3:120049636-120050136	TSS	Isca1	Isca1 Itri3:120049636-120050136			Promoter	No
Itri2:144982646-144983146	TSS	Iscu	Iscu Itri2:144982646-144983146			Promoter	No
Itri2:144983563-144984063	TSS	Iscu	Iscu Itri2:144983563-144984063	0.606568	1.7353e-49	Promoter	Yes
Itri2:144984590-144985090	TSS	Iscu	Iscu Itri2:144984590-144985090	0.349906	1.08898e-14	Promoter	Yes
Itri5:117996619-117997119	TSS	Isl2	Isl2 Itri5:117996619-117997119	0.363798	6.87167e-16	Promoter	No
Itri5:117997676-117998176	TSS	Isl2	Isl2 Itri5:117997676-117998176	0.734575	3.48761e-83	Promoter	Yes
Itri5:117998210-117998710	TSS	Isl2	Isl2 Itri5:117998210-117998710	0.594832	3.83307e-47	Promoter	Yes
Itri5:158174795-158175295	TSS	Ism1	Ism1 Itri5:158174795-158175295	0.296839	1.2118e-10	Promoter	Yes
Itri5:158175438-158175938	TSS	Ism1	Ism1 Itri5:158175438-158175938	0.605905	2.36637e-49	Promoter	Yes
Itri5:158176369-158176869	TSS	Ism1	Ism1 Itri5:158176369-158176869			PEs	No
Itri7:55450244-55450744	TSS	Itgae	Itgae Itri7:55450244-55450744			AEs	No
Itri9:30957531-30958031	TSS	Itih5	Itih5 Itri9:30957531-30958031	0.472426	1.34903e-27	Promoter	No
Itri9:30958856-30959356	TSS	Itih5	Itih5 Itri9:30958856-30959356			PEs	No
Itri6:185010948-185011448	TSS	Itm2c	Itm2c Itri6:185010948-185011448			Other	No
Itri6:185011473-185011973	TSS	Itm2c	Itm2c Itri6:185011473-185011973			Promoter	No
Itri6:185012862-185013362	TSS	Itm2c	Itm2c Itri6:185012862-185013362			Promoter	No
Itri16:14577119-14577619	TSS	Itpkc	Itpkc Itri16:14577119-14577619			Promoter	No
Itri16:14577624-14578124	TSS	Itpkc	Itpkc Itri16:14577624-14578124			Promoter	No
Itri16:14578215-14578715	TSS	Itpkc	Itpkc Itri16:14578215-14578715	0.363014	8.06101e-16	Promoter	Yes
Itri16:14578735-14579235	TSS	Itpkc	Itpkc Itri16:14578735-14579235	0.558013	2.20033e-40	Promoter	Yes
Itri18:28788207-28788707	TSS	Itsn1	Itsn1 Itri18:28788207-28788707			Promoter	No
Itri18:28788893-28789393	TSS	Itsn1	Itsn1 Itri18:28788893-28789393	0.398633	3.54799e-19	Promoter	Yes
Itri18:28789409-28789909	TSS	Itsn1	Itsn1 Itri18:28789409-28789909	0.461124	3.62649e-26	Promoter	Yes
Itri5:160425446-160425946	TSS	Jag1	Jag1 Itri5:160425446-160425946	0.690788	1.15351e-69	Promoter	Yes
Itri5:160426250-160426750	TSS	Jag1	Jag1 Itri5:160426250-160426750	0.752957	1.06657e-89	Promoter	Yes
Itri5:160426774-160427274	TSS	Jag1	Jag1 Itri5:160426774-160427274	0.564266	1.79594e-41	Promoter	Yes
Itri5:160427439-160427939	TSS	Jag1	Jag1 Itri5:160427439-160427939	0.494686	1.41002e-30	Promoter	Yes
Itri1:65838322-65838822	TSS	Jmjd1c	Jmjd1c Itri1:65838322-65838822			Promoter	No
Itri1:65839055-65839555	TSS	Jmjd1c	Jmjd1c Itri1:65839055-65839555			Promoter	Yes
Itri1:65839735-65840235	TSS	Jmjd1c	Jmjd1c Itri1:65839735-65840235			Promoter	Yes
Itri1:65788640-65789140	TSS	JMJD1C-like	JMJD1C-like Itri1:65788640-65789140			PEs	No
Itri1:65789455-65789955	TSS	JMJD1C-like	JMJD1C-like Itri1:65789455-65789955			Promoter	No
Itri1:65789969-65790469	TSS	JMJD1C-like	JMJD1C-like Itri1:65789969-65790469			Promoter	Yes
Itri4:66605411-66605911	TSS	Kansl2	Kansl2 Itri4:66605411-66605911			PEs	No
Itri4:66606431-66606931	TSS	Kansl2	Kansl2 Itri4:66606431-66606931			Promoter	Yes
Itri4:66607161-66607661	TSS	Kansl2	Kansl2 Itri4:66607161-66607661			Promoter	Yes
Itri1:56003989-56004489	TSS	Kat6b	Kat6b Itri1:56003989-56004489			Promoter	Yes
Itri1:56004511-56005011	TSS	Kat6b	Kat6b Itri1:56004511-56005011			Promoter	Yes
Itri1:56005423-56005923	TSS	Kat6b	Kat6b Itri1:56005423-56005923			Promoter	Yes
Itri1:56006034-56006534	TSS	Kat6b	Kat6b Itri1:56006034-56006534			Promoter	Yes
Itri4:170851354-170851854	TSS	Katnal1	Katnal1 Itri4:170851354-170851854			PEs	No
Itri4:170852825-170853325	TSS	Katnal1	Katnal1 Itri4:170852825-170853325			Promoter	Yes
Itri11:36736252-36736752	TSS	Kazn	Kazn Itri11:36736252-36736752	0.480134	1.32803e-28	Promoter	No
Itri11:36736837-36737337	TSS	Kazn	Kazn Itri11:36736837-36737337	0.715249	6.70069e-77	Promoter	No
Itri11:36737397-36737897	TSS	Kazn	Kazn Itri11:36737397-36737897	0.356026	3.27935e-15	Promoter	No
Itri11:36738060-36738560	TSS	Kazn	Kazn Itri11:36738060-36738560			Promoter	No
Itri11:36158439-36158939	TSS	KAZN-like	KAZN-like Itri11:36158439-36158939			Other	No
Itri11:36159598-36160098	TSS	KAZN-like	KAZN-like Itri11:36159598-36160098			Other	No
Itri11:18027139-18027639	TSS	Kcna3	Kcna3 Itri11:18027139-18027639			Promoter	Yes
Itri11:18029222-18029722	TSS	Kcna3	Kcna3 Itri11:18029222-18029722			Promoter	No
Itri5:189372351-189372851	TSS	Kcnb1	Kcnb1 Itri5:189372351-189372851	0.39198	1.61956e-18	PEs	Yes
Itri5:189374132-189374632	TSS	Kcnb1	Kcnb1 Itri5:189374132-189374632	0.750939	5.88634e-89	Promoter	Yes
Itri6:58085919-58086419	TSS	Kcnb2	Kcnb2 Itri6:58085919-58086419	0.700868	1.47848e-72	Promoter	Yes
Itri6:58087254-58087754	TSS	Kcnb2	Kcnb2 Itri6:58087254-58087754	0.556121	4.64706e-40	Promoter	No
Itri6:125395006-125395506	TSS	Kcnh7	Kcnh7 Itri6:125395006-125395506			Promoter	Yes
Itri6:125395574-125396074	TSS	Kcnh7	Kcnh7 Itri6:125395574-125396074	0.563098	2.88049e-41	Promoter	Yes
Itri6:125396098-125396598	TSS	Kcnh7	Kcnh7 Itri6:125396098-125396598	0.480872	1.06037e-28	Promoter	Yes
Itri6:125396683-125397183	TSS	Kcnh7	Kcnh7 Itri6:125396683-125397183	0.398138	3.97684e-19	Promoter	No
Itri1:32336400-32336900	TSS	Kcnip2	Kcnip2 Itri1:32336400-32336900	0.364344	6.14659e-16	AEs	No
Itri1:32337345-32337845	TSS	Kcnip2	Kcnip2 Itri1:32337345-32337845	0.456082	1.5144e-25	Promoter	Yes
Itri1:32338072-32338572	TSS	Kcnip2	Kcnip2 Itri1:32338072-32338572			Promoter	Yes
Itri1:53506243-53506743	TSS	Kcnma1	Kcnma1 Itri1:53506243-53506743	0.504876	5.1153e-32	Promoter	No
Itri1:53507653-53508153	TSS	Kcnma1	Kcnma1 Itri1:53507653-53508153	0.294974	1.62522e-10	Promoter	No
Itri1:53508254-53508754	TSS	Kcnma1	Kcnma1 Itri1:53508254-53508754	0.445406	2.88264e-24	Promoter	No
Itri4:10848598-10849098	TSS	Kctd17	Kctd17 Itri4:10848598-10849098	0.408589	3.42324e-20	Promoter	Yes
Itri4:10849155-10849655	TSS	Kctd17	Kctd17 Itri4:10849155-10849655			Promoter	Yes
Itri4:10849715-10850215	TSS	Kctd17	Kctd17 Itri4:10849715-10850215	0.265192	1.30928e-08	Other	No
Itri2:214924621-214925121	TSS	Kdm4b	Kdm4b Itri2:214924621-214925121			Other	No
Itri2:214925736-214926236	TSS	Kdm4b	Kdm4b Itri2:214925736-214926236	0.62053	2.09051e-52	AEs	No
Itri2:214926250-214926750	TSS	Kdm4b	Kdm4b Itri2:214926250-214926750	0.405227	7.60941e-20	AEs	No
Itri6:6976643-6977143	TSS	Khdrbs3	Khdrbs3 Itri6:6976643-6977143			Promoter	No
Itri6:6977209-6977709	TSS	Khdrbs3	Khdrbs3 Itri6:6977209-6977709			Promoter	Yes
Itri6:6978448-6978948	TSS	Khdrbs3	Khdrbs3 Itri6:6978448-6978948			Promoter	Yes
Itri2:214059768-214060268	TSS	Khsrp	Khsrp Itri2:214059768-214060268			Promoter	No
Itri2:214060521-214061021	TSS	Khsrp	Khsrp Itri2:214060521-214061021			PEs	No
Itri12:50611886-50612386	TSS	Kidins220	Kidins220 Itri12:50611886-50612386			Promoter	Yes
Itri12:50612984-50613484	TSS	Kidins220	Kidins220 Itri12:50612984-50613484	0.351466	8.03867e-15	Promoter	Yes
Itri12:50613608-50614108	TSS	Kidins220	Kidins220 Itri12:50613608-50614108			Other	No
Itri3:122228097-122228597	TSS	Kif27	Kif27 Itri3:122228097-122228597			Promoter	No
Itri3:122228685-122229185	TSS	Kif27	Kif27 Itri3:122228685-122229185			Promoter	No
Itri3:122229595-122230095	TSS	Kif27	Kif27 Itri3:122229595-122230095			Promoter	No
Itri2:201460907-201461407	TSS	Kif9	Kif9 Itri2:201460907-201461407			Promoter	No
Itri2:201461667-201462167	TSS	Kif9	Kif9 Itri2:201461667-201462167	0.318707	3.28251e-12	Promoter	Yes
Itri2:201462529-201463029	TSS	Kif9	Kif9 Itri2:201462529-201463029	0.414596	8.02162e-21	Promoter	Yes
Itri6:373764-374264	TSS	Kifc2	Kifc2 Itri6:373764-374264			Other	No
Itri6:374643-375143	TSS	Kifc2	Kifc2 Itri6:374643-375143			Promoter	No
Itri14:29134340-29134840	TSS	Kit	Kit Itri14:29134340-29134840			Promoter	Yes
Itri14:29135178-29135678	TSS	Kit	Kit Itri14:29135178-29135678			Promoter	Yes
Itri14:29135774-29136274	TSS	Kit	Kit Itri14:29135774-29136274			Promoter	Yes
Itri5:2676310-2676810	TSS	Klc1	Klc1 Itri5:2676310-2676810			AEs	No
Itri2:216765416-216765916	TSS	Klf16	Klf16 Itri2:216765416-216765916	0.536903	7.02473e-37	PEs	No
Itri2:216766041-216766541	TSS	Klf16	Klf16 Itri2:216766041-216766541	0.811756	4.16695e-115	PEs	No
Itri2:216767056-216767556	TSS	Klf16	Klf16 Itri2:216767056-216767556	0.482468	6.50237e-29	AEs	No
Itri2:216767569-216768069	TSS	Klf16	Klf16 Itri2:216767569-216768069	0.4467	2.02827e-24	PEs	No
Itri8:47039092-47039592	TSS	Klhdc3	Klhdc3 Itri8:47039092-47039592			Promoter	Yes
Itri8:47039740-47040240	TSS	Klhdc3	Klhdc3 Itri8:47039740-47040240	0.472901	1.17105e-27	Promoter	Yes
Itri8:47040397-47040897	TSS	Klhdc3	Klhdc3 Itri8:47040397-47040897			Promoter	Yes
Itri8:47040935-47041435	TSS	Klhdc3	Klhdc3 Itri8:47040935-47041435			Promoter	No
Itri2:201460907-201461407	TSS	Klhl18	Klhl18 Itri2:201460907-201461407			Promoter	No
Itri2:201461667-201462167	TSS	Klhl18	Klhl18 Itri2:201461667-201462167	0.389627	2.74772e-18	Promoter	Yes
Itri2:201462529-201463029	TSS	Klhl18	Klhl18 Itri2:201462529-201463029	0.478876	1.94765e-28	Promoter	Yes
Itri3:62620959-62621459	TSS	Klhl35	Klhl35 Itri3:62620959-62621459			Promoter	Yes
Itri3:62621590-62622090	TSS	Klhl35	Klhl35 Itri3:62621590-62622090	0.753426	7.14571e-90	Promoter	No
Itri3:62622198-62622698	TSS	Klhl35	Klhl35 Itri3:62622198-62622698	0.570361	1.48414e-42	Promoter	No
Itri3:62622744-62623244	TSS	Klhl35	Klhl35 Itri3:62622744-62623244	0.673539	5.53855e-65	Promoter	Yes
Itri16:27648633-27649133	TSS	Klhl36	Klhl36 Itri16:27648633-27649133			PEs	No
Itri16:27649397-27649897	TSS	Klhl36	Klhl36 Itri16:27649397-27649897			Promoter	Yes
Itri10:76421969-76422469	TSS	Klhl4	Klhl4 Itri10:76421969-76422469	0.715645	5.04551e-77	PEs	Yes
Itri3:100558130-100558630	TSS	Kmt2a	Kmt2a Itri3:100558130-100558630			Promoter	No
Itri3:100558747-100559247	TSS	Kmt2a	Kmt2a Itri3:100558747-100559247			Promoter	Yes
Itri3:100559755-100560255	TSS	Kmt2a	Kmt2a Itri3:100559755-100560255			Promoter	Yes
Itri7:92481791-92482291	TSS	Kpna4	Kpna4 Itri7:92481791-92482291			Promoter	Yes
Itri7:92482492-92482992	TSS	Kpna4	Kpna4 Itri7:92482492-92482992			Promoter	Yes
Itri7:92483039-92483539	TSS	Kpna4	Kpna4 Itri7:92483039-92483539			Promoter	Yes
Itri7:92483879-92484379	TSS	Kpna4	Kpna4 Itri7:92483879-92484379			Promoter	No
Itri16:19536658-19537158	TSS	Kptn	Kptn Itri16:19536658-19537158			Other	No
Itri16:19537668-19538168	TSS	Kptn	Kptn Itri16:19537668-19538168			Other	No
Itri12:80073685-80074185	TSS	Krcc1	Krcc1 Itri12:80073685-80074185	0.803561	4.66641e-111	Other	No
Itri12:80074482-80074982	TSS	Krcc1	Krcc1 Itri12:80074482-80074982	0.923921	4.51669e-205	Promoter	No
Itri12:80075385-80075885	TSS	Krcc1	Krcc1 Itri12:80075385-80075885	0.544241	4.54316e-38	PEs	No
Itri4:41766745-41767245	TSS	Krr1	Krr1 Itri4:41766745-41767245			Other	No
Itri4:41767282-41767782	TSS	Krr1	Krr1 Itri4:41767282-41767782			Promoter	Yes
Itri4:41767818-41768318	TSS	Krr1	Krr1 Itri4:41767818-41768318			Promoter	No
Itri7:21316871-21317371	TSS	KRT27	KRT27 Itri7:21316871-21317371	0.628238	4.40095e-54	AEs	No
Itri9:73798281-73798781	TSS	Lad1	Lad1 Itri9:73798281-73798781	0.407571	4.36275e-20	PEs	No
Itri9:73799130-73799630	TSS	Lad1	Lad1 Itri9:73799130-73799630	0.709457	4.05143e-75	PEs	Yes
Itri9:73799824-73800324	TSS	Lad1	Lad1 Itri9:73799824-73800324	0.316948	4.43874e-12	Other	No
Itri15:19768768-19769268	TSS	Lamtor3	Lamtor3 Itri15:19768768-19769268			Promoter	No
Itri15:19769484-19769984	TSS	Lamtor3	Lamtor3 Itri15:19769484-19769984			Promoter	Yes
Itri15:19769997-19770497	TSS	Lamtor3	Lamtor3 Itri15:19769997-19770497			Promoter	Yes
Itri9:133627396-133627896	TSS	Lamtor4	Lamtor4 Itri9:133627396-133627896			Promoter	No
Itri9:133628139-133628639	TSS	Lamtor4	Lamtor4 Itri9:133628139-133628639	-0.433722	6.43831e-23	Promoter	Yes
Itri9:133629054-133629554	TSS	Lamtor4	Lamtor4 Itri9:133629054-133629554			Other	No
Itri1:109674979-109675479	TSS	Larp1	Larp1 Itri1:109674979-109675479			Other	No
Itri1:109675602-109676102	TSS	Larp1	Larp1 Itri1:109675602-109676102	0.328222	6.1798e-13	Other	No
Itri1:146925310-146925810	TSS	Lars	Lars Itri1:146925310-146925810			Other	No
Itri1:146925951-146926451	TSS	Lars	Lars Itri1:146925951-146926451	-0.507854	1.89971e-32	Promoter	Yes
Itri1:146926610-146927110	TSS	Lars	Lars Itri1:146926610-146927110			Promoter	No
Itri1:146927261-146927761	TSS	Lars	Lars Itri1:146927261-146927761			Promoter	No
Itri8:75827085-75827585	TSS	Lca5	Lca5 Itri8:75827085-75827585			AEs	No
Itri8:75828027-75828527	TSS	Lca5	Lca5 Itri8:75828027-75828527	0.436334	3.24996e-23	Promoter	No
Itri8:75828558-75829058	TSS	Lca5	Lca5 Itri8:75828558-75829058			AEs	No
Itri1:36680017-36680517	TSS	Lcor	Lcor Itri1:36680017-36680517			Promoter	No
Itri1:36681972-36682472	TSS	Lcor	Lcor Itri1:36681972-36682472			Promoter	No
Itri10:109128399-109128899	TSS	Ldoc1	Ldoc1 Itri10:109128399-109128899			Promoter	Yes
Itri10:109129290-109129790	TSS	Ldoc1	Ldoc1 Itri10:109129290-109129790			Promoter	No
Itri7:85922479-85922979	TSS	Lekr1	Lekr1 Itri7:85922479-85922979			Promoter	No
Itri7:85923198-85923698	TSS	Lekr1	Lekr1 Itri7:85923198-85923698	0.46032	4.56258e-26	Promoter	Yes
Itri7:85923830-85924330	TSS	Lekr1	Lekr1 Itri7:85923830-85924330			Promoter	No
Itri16:2396009-2396509	TSS	Leng8	Leng8 Itri16:2396009-2396509			Promoter	No
Itri16:2396547-2397047	TSS	Leng8	Leng8 Itri16:2396547-2397047			Promoter	Yes
Itri16:2397124-2397624	TSS	Leng8	Leng8 Itri16:2397124-2397624			Promoter	No
Itri17:45046765-45047265	TSS	Leprotl1	Leprotl1 Itri17:45046765-45047265			Promoter	No
Itri17:45047379-45047879	TSS	Leprotl1	Leprotl1 Itri17:45047379-45047879			Promoter	Yes
Itri17:45047882-45048382	TSS	Leprotl1	Leprotl1 Itri17:45047882-45048382	0.350999	8.805e-15	Promoter	No
Itri17:45048506-45049006	TSS	Leprotl1	Leprotl1 Itri17:45048506-45049006			Promoter	No
Itri9:40209311-40209811	TSS	Lgals8	Lgals8 Itri9:40209311-40209811			Promoter	Yes
Itri9:40210123-40210623	TSS	Lgals8	Lgals8 Itri9:40210123-40210623			Promoter	No
Itri7:35741844-35742344	TSS	Lhx1	Lhx1 Itri7:35741844-35742344	0.435968	3.57807e-23	Promoter	No
Itri7:35742658-35743158	TSS	Lhx1	Lhx1 Itri7:35742658-35743158	0.598056	8.8936e-48	Promoter	Yes
Itri7:35743257-35743757	TSS	Lhx1	Lhx1 Itri7:35743257-35743757	0.259164	2.97849e-08	Promoter	Yes
Itri7:35743876-35744376	TSS	Lhx1	Lhx1 Itri7:35743876-35744376	0.293808	1.95021e-10	Promoter	No
Itri3:201812608-201813108	TSS	Lhx3	Lhx3 Itri3:201812608-201813108	0.438109	2.03583e-23	Other	No
Itri3:201813512-201814012	TSS	Lhx3	Lhx3 Itri3:201813512-201814012	0.602344	1.24275e-48	Other	No
Itri3:201814047-201814547	TSS	Lhx3	Lhx3 Itri3:201814047-201814547	0.698704	6.31971e-72	AEs	No
Itri3:201814972-201815472	TSS	Lhx3	Lhx3 Itri3:201814972-201815472	0.6819	3.27153e-67	Other	No
Itri4:65256961-65257461	TSS	Lima1	Lima1 Itri4:65256961-65257461	0.688604	4.71418e-69	Promoter	Yes
Itri16:21440291-21440791	TSS	Lin7b	Lin7b Itri16:21440291-21440791			Other	No
Itri16:21440988-21441488	TSS	Lin7b	Lin7b Itri16:21440988-21441488	0.369292	2.21386e-16	Promoter	Yes
Itri16:21441694-21442194	TSS	Lin7b	Lin7b Itri16:21441694-21442194			Promoter	Yes
Itri3:36572617-36573117	TSS	Lin7c	Lin7c Itri3:36572617-36573117			Promoter	Yes
Itri3:36573301-36573801	TSS	Lin7c	Lin7c Itri3:36573301-36573801			Promoter	Yes
Itri2:216461428-216461928	TSS	Lingo3	Lingo3 Itri2:216461428-216461928			AEs	No
Itri2:216462013-216462513	TSS	Lingo3	Lingo3 Itri2:216462013-216462513			AEs	No
Itri2:216462968-216463468	TSS	Lingo3	Lingo3 Itri2:216462968-216463468			PEs	No
Itri2:216463501-216464001	TSS	Lingo3	Lingo3 Itri2:216463501-216464001			Other	Yes
Itri5:115937267-115937767	TSS	Lman1l	Lman1l Itri5:115937267-115937767	0.338277	9.89384e-14	Other	Yes
Itri11:97881504-97882004	TSS	Lmo4	Lmo4 Itri11:97881504-97882004			Promoter	Yes
Itri11:97882170-97882670	TSS	Lmo4	Lmo4 Itri11:97882170-97882670	0.326103	9.01323e-13	Promoter	No
Itri1:168346841-168347341	TSS	Lnpep	Lnpep Itri1:168346841-168347341			Promoter	Yes
Itri1:168347391-168347891	TSS	Lnpep	Lnpep Itri1:168347391-168347891			Promoter	No
Itri1:168348011-168348511	TSS	Lnpep	Lnpep Itri1:168348011-168348511			AEs	No
Itri5:115226314-115226814	TSS	Loxl1	Loxl1 Itri5:115226314-115226814			PEs	No
Itri5:115227310-115227810	TSS	Loxl1	Loxl1 Itri5:115227310-115227810	0.630951	1.10062e-54	PEs	Yes
Itri5:115228167-115228667	TSS	Loxl1	Loxl1 Itri5:115228167-115228667	0.617102	1.12165e-51	Promoter	Yes
Itri9:64280206-64280706	TSS	Lpgat1	Lpgat1 Itri9:64280206-64280706			Other	No
Itri8:34575857-34576357	TSS	LPGAT1-like	LPGAT1-like Itri8:34575857-34576357			Promoter	Yes
Itri4:57541950-57542450	TSS	Lrp1	Lrp1 Itri4:57541950-57542450			Promoter	Yes
Itri4:57542542-57543042	TSS	Lrp1	Lrp1 Itri4:57542542-57543042	0.289406	3.85149e-10	Promoter	Yes
Itri4:57543205-57543705	TSS	Lrp1	Lrp1 Itri4:57543205-57543705			Promoter	Yes
Itri4:57543707-57544207	TSS	Lrp1	Lrp1 Itri4:57543707-57544207			Promoter	Yes
Itri6:131371728-131372228	TSS	Lrp2	Lrp2 Itri6:131371728-131372228	0.445591	2.74146e-24	Promoter	Yes
Itri6:131372513-131373013	TSS	Lrp2	Lrp2 Itri6:131372513-131373013	0.392232	1.52993e-18	Promoter	Yes
Itri6:131373056-131373556	TSS	Lrp2	Lrp2 Itri6:131373056-131373556			Promoter	Yes
Itri6:131373629-131374129	TSS	Lrp2	Lrp2 Itri6:131373629-131374129			Promoter	No
Itri3:20098992-20099492	TSS	Lrp4	Lrp4 Itri3:20098992-20099492	0.373387	9.38308e-17	PEs	Yes
Itri3:20099741-20100241	TSS	Lrp4	Lrp4 Itri3:20099741-20100241	0.785786	6.82588e-103	Promoter	No
Itri3:20100388-20100888	TSS	Lrp4	Lrp4 Itri3:20100388-20100888	0.754177	3.76547e-90	Promoter	Yes
Itri11:67674798-67675298	TSS	Lrp8	Lrp8 Itri11:67674798-67675298	0.518581	4.92515e-34	Promoter	Yes
Itri11:67676259-67676759	TSS	Lrp8	Lrp8 Itri11:67676259-67676759			AEs	Yes
Itri14:66531624-66532124	TSS	Lrpap1	Lrpap1 Itri14:66531624-66532124			PEs	No
Itri14:66532628-66533128	TSS	Lrpap1	Lrpap1 Itri14:66532628-66533128			Promoter	Yes
Itri14:66533139-66533639	TSS	Lrpap1	Lrpap1 Itri14:66533139-66533639			Promoter	No
Itri12:36530971-36531471	TSS	Lrpprc	Lrpprc Itri12:36530971-36531471			Other	No
Itri12:36531919-36532419	TSS	Lrpprc	Lrpprc Itri12:36531919-36532419	0.5044	5.98697e-32	Promoter	Yes
Itri12:36532647-36533147	TSS	Lrpprc	Lrpprc Itri12:36532647-36533147			Promoter	Yes
Itri7:101016462-101016962	TSS	Lrrc34	Lrrc34 Itri7:101016462-101016962	0.357592	2.40236e-15	Promoter	No
Itri7:101017051-101017551	TSS	Lrrc34	Lrrc34 Itri7:101017051-101017551			Other	No
Itri2:184812748-184813248	TSS	Lrrc3b	Lrrc3b Itri2:184812748-184813248			Other	No
Itri2:184813788-184814288	TSS	Lrrc3b	Lrrc3b Itri2:184813788-184814288	0.409673	2.6399e-20	PEs	Yes
Itri2:184814387-184814887	TSS	Lrrc3b	Lrrc3b Itri2:184814387-184814887	0.691787	6.0314e-70	Promoter	Yes
Itri11:61513350-61513850	TSS	Lrrc41	Lrrc41 Itri11:61513350-61513850			Promoter	Yes
Itri11:61513955-61514455	TSS	Lrrc41	Lrrc41 Itri11:61513955-61514455	0.261863	2.06695e-08	Promoter	No
Itri11:61514616-61515116	TSS	Lrrc41	Lrrc41 Itri11:61514616-61515116			Promoter	Yes
Itri11:61515120-61515620	TSS	Lrrc41	Lrrc41 Itri11:61515120-61515620			Promoter	Yes
Itri5:87978077-87978577	TSS	Lrrc57	Lrrc57 Itri5:87978077-87978577	0.559363	1.28655e-40	Promoter	No
Itri5:87978657-87979157	TSS	Lrrc57	Lrrc57 Itri5:87978657-87979157	0.368402	2.66483e-16	Promoter	No
Itri5:87979190-87979690	TSS	Lrrc57	Lrrc57 Itri5:87979190-87979690			Promoter	No
Itri2:141986588-141987088	TSS	Lrrc75b	Lrrc75b Itri2:141986588-141987088			Other	No
Itri2:141987108-141987608	TSS	Lrrc75b	Lrrc75b Itri2:141987108-141987608	0.542164	9.93013e-38	PEs	No
Itri2:141987667-141988167	TSS	Lrrc75b	Lrrc75b Itri2:141987667-141988167	0.650997	2.52461e-59	Promoter	Yes
Itri2:141988337-141988837	TSS	Lrrc75b	Lrrc75b Itri2:141988337-141988837	0.567261	5.30659e-42	Promoter	Yes
Itri2:141988882-141989382	TSS	Lrrc75b	Lrrc75b Itri2:141988882-141989382	0.571064	1.10939e-42	Promoter	No
Itri2:193552994-193553494	TSS	Lrrfip2	Lrrfip2 Itri2:193552994-193553494			Promoter	Yes
Itri2:193553612-193554112	TSS	Lrrfip2	Lrrfip2 Itri2:193553612-193554112			Promoter	Yes
Itri2:193554628-193555128	TSS	Lrrfip2	Lrrfip2 Itri2:193554628-193555128			Promoter	No
Itri19:10386952-10387452	TSS	Lrrn1	Lrrn1 Itri19:10386952-10387452			AEs	Yes
Itri19:10387655-10388155	TSS	Lrrn1	Lrrn1 Itri19:10387655-10388155			Promoter	Yes
Itri19:10388243-10388743	TSS	Lrrn1	Lrrn1 Itri19:10388243-10388743			Promoter	Yes
Itri1:153637139-153637639	TSS	Lrrtm2	Lrrtm2 Itri1:153637139-153637639			Promoter	No
Itri1:153637645-153638145	TSS	Lrrtm2	Lrrtm2 Itri1:153637645-153638145	0.530097	8.41445e-36	Promoter	Yes
Itri2:172352125-172352625	TSS	Lrtm1	Lrtm1 Itri2:172352125-172352625	0.786908	2.19699e-103	AEs	No
Itri2:172352963-172353463	TSS	Lrtm1	Lrtm1 Itri2:172352963-172353463	0.757122	2.97438e-91	AEs	Yes
Itri2:172353756-172354256	TSS	Lrtm1	Lrtm1 Itri2:172353756-172354256			PEs	No
Itri2:216438259-216438759	TSS	Lsm7	Lsm7 Itri2:216438259-216438759			Promoter	No
Itri2:216438888-216439388	TSS	Lsm7	Lsm7 Itri2:216438888-216439388			Promoter	No
Itri16:10606661-10607161	TSS	Lsr	Lsr Itri16:10606661-10607161	0.316745	4.59585e-12	Promoter	No
Itri16:10607324-10607824	TSS	Lsr	Lsr Itri16:10607324-10607824	0.421538	1.44276e-21	Promoter	Yes
Itri16:10607867-10608367	TSS	Lsr	Lsr Itri16:10607867-10608367	0.311977	1.0307e-11	Promoter	Yes
Itri16:10608647-10609147	TSS	Lsr	Lsr Itri16:10608647-10609147			Other	No
Itri18:24452887-24453387	TSS	Ltn1	Ltn1 Itri18:24452887-24453387			Promoter	No
Itri18:24453425-24453925	TSS	Ltn1	Ltn1 Itri18:24453425-24453925			Promoter	Yes
Itri18:24453935-24454435	TSS	Ltn1	Ltn1 Itri18:24453935-24454435			Promoter	No
Itri7:26062656-26063156	TSS	Luc7l3	Luc7l3 Itri7:26062656-26063156			Promoter	No
Itri7:26063174-26063674	TSS	Luc7l3	Luc7l3 Itri7:26063174-26063674	0.355011	4.00925e-15	Promoter	Yes
Itri7:26064098-26064598	TSS	Luc7l3	Luc7l3 Itri7:26064098-26064598	0.476294	4.24688e-28	Promoter	No
Itri7:84460618-84461118	TSS	Lxn	Lxn Itri7:84460618-84461118			Promoter	Yes
Itri7:84461420-84461920	TSS	Lxn	Lxn Itri7:84461420-84461920			PEs	No
Itri6:1407343-1407843	TSS	Ly6h	Ly6h Itri6:1407343-1407843			Promoter	Yes
Itri6:1408492-1408992	TSS	Ly6h	Ly6h Itri6:1408492-1408992	0.34735	1.78274e-14	Promoter	Yes
Itri6:1409260-1409760	TSS	Ly6h	Ly6h Itri6:1409260-1409760			PEs	Yes
Itri8:83863962-83864462	TSS	Lyrm2	Lyrm2 Itri8:83863962-83864462			Other	No
Itri8:83864551-83865051	TSS	Lyrm2	Lyrm2 Itri8:83864551-83865051	0.502733	1.03718e-31	Promoter	Yes
Itri8:83865062-83865562	TSS	Lyrm2	Lyrm2 Itri8:83865062-83865562	0.44308	5.40411e-24	Promoter	No
Itri17:14184617-14185117	TSS	Lzts1	Lzts1 Itri17:14184617-14185117	0.353643	5.24963e-15	PEs	No
Itri17:14185324-14185824	TSS	Lzts1	Lzts1 Itri17:14185324-14185824	0.624188	3.39284e-53	Promoter	No
Itri17:14186085-14186585	TSS	Lzts1	Lzts1 Itri17:14186085-14186585	0.540468	1.87344e-37	Promoter	No
Itri11:55228138-55228638	TSS	Macf1	Macf1 Itri11:55228138-55228638			Other	No
Itri11:55229971-55230471	TSS	Macf1	Macf1 Itri11:55229971-55230471			Promoter	No
Itri11:34717753-34718253	TSS	Mad2l2	Mad2l2 Itri11:34717753-34718253			Promoter	No
Itri11:34719152-34719652	TSS	Mad2l2	Mad2l2 Itri11:34719152-34719652	0.548299	9.6952e-39	Other	No
Itri10:39299508-39300008	TSS	Maged2	Maged2 Itri10:39299508-39300008	0.34967	1.13969e-14	Promoter	Yes
Itri10:39300159-39300659	TSS	Maged2	Maged2 Itri10:39300159-39300659			Promoter	Yes
Itri10:43256371-43256871	TSS	Magee2	Magee2 Itri10:43256371-43256871	0.379441	2.57607e-17	Promoter	Yes
Itri10:43256875-43257375	TSS	Magee2	Magee2 Itri10:43256875-43257375	0.335935	1.52485e-13	Promoter	No
Itri3:7509855-7510355	TSS	MALAT1	MALAT1 Itri3:7509855-7510355			Promoter	No
Itri3:7510510-7511010	TSS	MALAT1	MALAT1 Itri3:7510510-7511010			Promoter	No
Itri3:7511494-7511994	TSS	MALAT1	MALAT1 Itri3:7511494-7511994			Promoter	No
Itri1:156382301-156382801	TSS	MALAT1-containing	MALAT1-containing Itri1:156382301-156382801			Other	No
Itri1:156383779-156384279	TSS	MALAT1-containing	MALAT1-containing Itri1:156383779-156384279			Other	No
Itri1:202219062-202219562	TSS	Map3k1	Map3k1 Itri1:202219062-202219562	0.470318	2.51658e-27	Promoter	Yes
Itri1:202219678-202220178	TSS	Map3k1	Map3k1 Itri1:202219678-202220178	0.439828	1.29081e-23	Promoter	Yes
Itri7:118368608-118369108	TSS	Map3k13	Map3k13 Itri7:118368608-118369108			Promoter	No
Itri7:118369143-118369643	TSS	Map3k13	Map3k13 Itri7:118369143-118369643			Promoter	No
Itri7:118369799-118370299	TSS	Map3k13	Map3k13 Itri7:118369799-118370299	0.390741	2.14007e-18	Other	No
Itri7:118440504-118441004	TSS	MAP3K13-containing	MAP3K13-containing Itri7:118440504-118441004			Promoter	No
Itri7:118441032-118441532	TSS	MAP3K13-containing	MAP3K13-containing Itri7:118441032-118441532			Promoter	No
Itri7:118441570-118442070	TSS	MAP3K13-containing	MAP3K13-containing Itri7:118441570-118442070			Promoter	No
Itri7:118442253-118442753	TSS	MAP3K13-containing	MAP3K13-containing Itri7:118442253-118442753			Other	No
Itri9:9262422-9262922	TSS	Map3k8	Map3k8 Itri9:9262422-9262922	0.250403	9.46053e-08	Promoter	Yes
Itri9:9263158-9263658	TSS	Map3k8	Map3k8 Itri9:9263158-9263658	0.487192	1.50586e-29	Promoter	Yes
Itri9:9263666-9264166	TSS	Map3k8	Map3k8 Itri9:9263666-9264166	0.490562	5.2314e-30	Promoter	No
Itri3:62839173-62839673	TSS	Map6	Map6 Itri3:62839173-62839673			Other	No
Itri8:124177733-124178233	TSS	Map7	Map7 Itri8:124177733-124178233			AEs	No
Itri8:124178545-124179045	TSS	Map7	Map7 Itri8:124178545-124179045	-0.320301	2.49244e-12	AEs	No
Itri8:124179117-124179617	TSS	Map7	Map7 Itri8:124179117-124179617			AEs	No
Itri15:37454888-37455388	TSS	Map9	Map9 Itri15:37454888-37455388	0.648789	8.5231e-59	PEs	No
Itri15:37455402-37455902	TSS	Map9	Map9 Itri15:37455402-37455902	0.667279	2.32465e-63	Promoter	Yes
Itri15:37455943-37456443	TSS	Map9	Map9 Itri15:37455943-37456443	0.388688	3.38865e-18	Promoter	Yes
Itri5:74330595-74331095	TSS	Mapk1ip1l	Mapk1ip1l Itri5:74330595-74331095			Promoter	Yes
Itri5:74331340-74331840	TSS	Mapk1ip1l	Mapk1ip1l Itri5:74331340-74331840			Promoter	No
Itri5:74332062-74332562	TSS	Mapk1ip1l	Mapk1ip1l Itri5:74332062-74332562			PEs	No
Itri9:104445384-104445884	TSS	Mapk8ip3	Mapk8ip3 Itri9:104445384-104445884			Promoter	No
Itri9:104445969-104446469	TSS	Mapk8ip3	Mapk8ip3 Itri9:104445969-104446469			Promoter	Yes
Itri9:104446744-104447244	TSS	Mapk8ip3	Mapk8ip3 Itri9:104446744-104447244			Promoter	No
Itri7:16811825-16812325	TSS	Mapt	Mapt Itri7:16811825-16812325	0.363881	6.75517e-16	Promoter	Yes
Itri7:16812470-16812970	TSS	Mapt	Mapt Itri7:16812470-16812970	0.255528	4.83849e-08	Promoter	No
Itri7:16813076-16813576	TSS	Mapt	Mapt Itri7:16813076-16813576	-0.413638	1.01291e-20	Promoter	Yes
Itri7:16813718-16814218	TSS	Mapt	Mapt Itri7:16813718-16814218			Promoter	Yes
Itri1:138848066-138848566	TSS	March3	March3 Itri1:138848066-138848566			Promoter	No
Itri1:138848597-138849097	TSS	March3	March3 Itri1:138848597-138849097	-0.250879	8.89458e-08	Promoter	No
Itri1:138849159-138849659	TSS	March3	March3 Itri1:138849159-138849659	-0.45013	7.92817e-25	Promoter	No
Itri5:2903296-2903796	TSS	Mark3	Mark3 Itri5:2903296-2903796			Promoter	No
Itri5:2904425-2904925	TSS	Mark3	Mark3 Itri5:2904425-2904925	-0.267169	9.95147e-09	Promoter	Yes
Itri5:2904960-2905460	TSS	Mark3	Mark3 Itri5:2904960-2905460			Promoter	No
Itri2:215689344-215689844	TSS	Matk	Matk Itri2:215689344-215689844			Other	No
Itri2:215689998-215690498	TSS	Matk	Matk Itri2:215689998-215690498	0.263059	1.75578e-08	PEs	No
Itri2:215690522-215691022	TSS	Matk	Matk Itri2:215690522-215691022	0.430128	1.63301e-22	Promoter	No
Itri6:37478183-37478683	TSS	Matn2	Matn2 Itri6:37478183-37478683	0.724192	9.67979e-80	Promoter	Yes
Itri6:37478761-37479261	TSS	Matn2	Matn2 Itri6:37478761-37479261	0.756033	7.64348e-91	Promoter	Yes
Itri6:37479770-37480270	TSS	Matn2	Matn2 Itri6:37479770-37480270			Other	No
Itri13:34272739-34273239	TSS	Mbd2	Mbd2 Itri13:34272739-34273239			Promoter	No
Itri13:34273312-34273812	TSS	Mbd2	Mbd2 Itri13:34273312-34273812			Promoter	Yes
Itri4:57199849-57200349	TSS	Mbd6	Mbd6 Itri4:57199849-57200349	0.327247	7.35364e-13	Promoter	Yes
Itri4:57200601-57201101	TSS	Mbd6	Mbd6 Itri4:57200601-57201101			Promoter	No
Itri4:57201216-57201716	TSS	Mbd6	Mbd6 Itri4:57201216-57201716			Promoter	No
Itri4:57201775-57202275	TSS	Mbd6	Mbd6 Itri4:57201775-57202275			Promoter	No
Itri1:126165149-126165649	TSS	Mcc	Mcc Itri1:126165149-126165649	0.37458	7.28955e-17	Promoter	No
Itri1:126165696-126166196	TSS	Mcc	Mcc Itri1:126165696-126166196			Promoter	No
Itri1:126166292-126166792	TSS	Mcc	Mcc Itri1:126166292-126166792			Promoter	No
Itri1:126166918-126167418	TSS	Mcc	Mcc Itri1:126166918-126167418			PEs	No
Itri10:107664469-107664969	TSS	Mcf2	Mcf2 Itri10:107664469-107664969			Other	No
Itri10:91495165-91495665	TSS	Mcts1	Mcts1 Itri10:91495165-91495665			Promoter	No
Itri10:91495950-91496450	TSS	Mcts1	Mcts1 Itri10:91495950-91496450			Promoter	No
Itri10:91496510-91497010	TSS	Mcts1	Mcts1 Itri10:91496510-91497010			Promoter	No
Itri7:52734117-52734617	TSS	Med11	Med11 Itri7:52734117-52734617			Other	No
Itri7:52734783-52735283	TSS	Med11	Med11 Itri7:52734783-52735283			Promoter	No
Itri16:13812160-13812660	TSS	Med29	Med29 Itri16:13812160-13812660			Promoter	Yes
Itri16:13812762-13813262	TSS	Med29	Med29 Itri16:13812762-13813262	-0.321515	2.0181e-12	Promoter	Yes
Itri16:13813343-13813843	TSS	Med29	Med29 Itri16:13813343-13813843			Promoter	Yes
Itri16:13813942-13814442	TSS	Med29	Med29 Itri16:13813942-13814442			Other	No
Itri5:130799037-130799537	TSS	Mesp1	Mesp1 Itri5:130799037-130799537			Other	No
Itri5:130800109-130800609	TSS	Mesp1	Mesp1 Itri5:130800109-130800609			Promoter	Yes
Itri5:130800647-130801147	TSS	Mesp1	Mesp1 Itri5:130800647-130801147			Other	Yes
Itri2:216975257-216975757	TSS	Mex3d	Mex3d Itri2:216975257-216975757	0.281156	1.33409e-09	Promoter	No
Itri2:216976752-216977252	TSS	Mex3d	Mex3d Itri2:216976752-216977252	0.369554	2.09614e-16	Promoter	Yes
Itri2:216977275-216977775	TSS	Mex3d	Mex3d Itri2:216977275-216977775	0.777814	1.76567e-99	Promoter	Yes
Itri1:119753600-119754100	TSS	Mgat4b	Mgat4b Itri1:119753600-119754100			Promoter	Yes
Itri1:119754909-119755409	TSS	Mgat4b	Mgat4b Itri1:119754909-119755409			Promoter	Yes
Itri1:119755716-119756216	TSS	Mgat4b	Mgat4b Itri1:119755716-119756216			PEs	Yes
Itri9:101817994-101818494	TSS	Mgst3	Mgst3 Itri9:101817994-101818494			Promoter	Yes
Itri9:101818599-101819099	TSS	Mgst3	Mgst3 Itri9:101818599-101819099			Promoter	No
Itri9:101819186-101819686	TSS	Mgst3	Mgst3 Itri9:101819186-101819686			Promoter	No
Itri9:101819970-101820470	TSS	Mgst3	Mgst3 Itri9:101819970-101820470			Other	No
Itri5:160656467-160656967	TSS	Mkks	Mkks Itri5:160656467-160656967			Promoter	No
Itri5:160657387-160657887	TSS	Mkks	Mkks Itri5:160657387-160657887	0.277232	2.37294e-09	Promoter	Yes
Itri5:160657892-160658392	TSS	Mkks	Mkks Itri5:160657892-160658392	0.259296	2.92655e-08	Promoter	No
Itri5:160658420-160658920	TSS	Mkks	Mkks Itri5:160658420-160658920			Promoter	No
Itri2:214154912-214155412	TSS	Mllt1	Mllt1 Itri2:214154912-214155412			Other	No
Itri2:214156431-214156931	TSS	Mllt1	Mllt1 Itri2:214156431-214156931			Promoter	No
Itri2:214157247-214157747	TSS	Mllt1	Mllt1 Itri2:214157247-214157747			PEs	No
Itri2:144200800-144201300	TSS	Mmab	Mmab Itri2:144200800-144201300			Promoter	No
Itri2:144201381-144201881	TSS	Mmab	Mmab Itri2:144201381-144201881	-0.351415	8.11852e-15	Promoter	Yes
Itri2:144202310-144202810	TSS	Mmab	Mmab Itri2:144202310-144202810			Other	No
Itri16:49636126-49636626	TSS	Mmp15	Mmp15 Itri16:49636126-49636626	-0.254684	5.40892e-08	Promoter	Yes
Itri16:49636871-49637371	TSS	Mmp15	Mmp15 Itri16:49636871-49637371			Promoter	Yes
Itri16:49637593-49638093	TSS	Mmp15	Mmp15 Itri16:49637593-49638093	0.339926	7.27816e-14	AEs	No
Itri5:191591953-191592453	TSS	Mmp9	Mmp9 Itri5:191591953-191592453			Other	No
Itri5:191593354-191593854	TSS	Mmp9	Mmp9 Itri5:191593354-191593854			Other	No
Itri5:12352556-12353056	TSS	Moap1	Moap1 Itri5:12352556-12353056			Promoter	Yes
Itri5:12353139-12353639	TSS	Moap1	Moap1 Itri5:12353139-12353639			Promoter	Yes
Itri5:12353704-12354204	TSS	Moap1	Moap1 Itri5:12353704-12354204			Promoter	Yes
Itri10:116160687-116161187	TSS	MPC2	MPC2 Itri10:116160687-116161187			Promoter	Yes
Itri4:120476992-120477492	TSS	Mphosph8	Mphosph8 Itri4:120476992-120477492			Promoter	No
Itri4:120477644-120478144	TSS	Mphosph8	Mphosph8 Itri4:120477644-120478144	0.694068	1.36059e-70	Promoter	Yes
Itri4:120478265-120478765	TSS	Mphosph8	Mphosph8 Itri4:120478265-120478765			Promoter	No
Itri7:73932569-73933069	TSS	Mras	Mras Itri7:73932569-73933069	0.266898	1.03344e-08	Other	Yes
Itri7:73933399-73933899	TSS	Mras	Mras Itri7:73933399-73933899			Promoter	Yes
Itri7:73934085-73934585	TSS	Mras	Mras Itri7:73934085-73934585	0.371872	1.29095e-16	Promoter	Yes
Itri6:171421395-171421895	TSS	Mreg	Mreg Itri6:171421395-171421895	0.46215	2.70379e-26	Promoter	No
Itri6:171422004-171422504	TSS	Mreg	Mreg Itri6:171422004-171422504	0.699589	3.49558e-72	Promoter	Yes
Itri5:194850296-194850796	TSS	Mrgbp	Mrgbp Itri5:194850296-194850796			Promoter	No
Itri8:48023795-48024295	TSS	Mrpl14	Mrpl14 Itri8:48023795-48024295			Promoter	Yes
Itri8:48025484-48025984	TSS	Mrpl14	Mrpl14 Itri8:48025484-48025984			Promoter	Yes
Itri11:27705326-27705826	TSS	Mrpl20	Mrpl20 Itri11:27705326-27705826			Other	No
Itri3:1582419-1582919	TSS	Mrpl23	Mrpl23 Itri3:1582419-1582919	0.253294	6.49359e-08	AEs	No
Itri3:1582923-1583423	TSS	Mrpl23	Mrpl23 Itri3:1582923-1583423			AEs	Yes
Itri3:1584041-1584541	TSS	Mrpl23	Mrpl23 Itri3:1584041-1584541			Promoter	Yes
Itri7:25758013-25758513	TSS	Mrpl27	Mrpl27 Itri7:25758013-25758513			Promoter	No
Itri7:25758659-25759159	TSS	Mrpl27	Mrpl27 Itri7:25758659-25759159			Promoter	Yes
Itri7:68164471-68164971	TSS	Mrpl3	Mrpl3 Itri7:68164471-68164971			Promoter	Yes
Itri7:68165192-68165692	TSS	Mrpl3	Mrpl3 Itri7:68165192-68165692			Other	No
Itri2:98882695-98883195	TSS	Mrpl32	Mrpl32 Itri2:98882695-98883195			Promoter	Yes
Itri2:98883226-98883726	TSS	Mrpl32	Mrpl32 Itri2:98883226-98883726	0.29483	1.66235e-10	Promoter	Yes
Itri2:98883906-98884406	TSS	Mrpl32	Mrpl32 Itri2:98883906-98884406			Promoter	No
Itri4:102607404-102607904	TSS	Mrpl51	Mrpl51 Itri4:102607404-102607904			Promoter	Yes
Itri4:102608068-102608568	TSS	Mrpl51	Mrpl51 Itri4:102608068-102608568			Promoter	Yes
Itri4:102608816-102609316	TSS	Mrpl51	Mrpl51 Itri4:102608816-102609316			Promoter	Yes
Itri12:10043449-10043949	TSS	Mrpl53	Mrpl53 Itri12:10043449-10043949			Other	Yes
Itri12:10044139-10044639	TSS	Mrpl53	Mrpl53 Itri12:10044139-10044639			PEs	No
Itri12:10045154-10045654	TSS	Mrpl53	Mrpl53 Itri12:10045154-10045654			Promoter	Yes
Itri1:87766698-87767198	TSS	Mrpl55	Mrpl55 Itri1:87766698-87767198	0.333673	2.30822e-13	Promoter	No
Itri1:87767407-87767907	TSS	Mrpl55	Mrpl55 Itri1:87767407-87767907			Promoter	No
Itri1:87768165-87768665	TSS	Mrpl55	Mrpl55 Itri1:87768165-87768665			Other	No
Itri3:104177534-104178034	TSS	MRPL9	MRPL9 Itri3:104177534-104178034			Promoter	Yes
Itri8:33927357-33927857	TSS	Mrps18b	Mrps18b Itri8:33927357-33927857			Promoter	Yes
Itri8:33927863-33928363	TSS	Mrps18b	Mrps18b Itri8:33927863-33928363			Promoter	Yes
Itri8:33928496-33928996	TSS	Mrps18b	Mrps18b Itri8:33928496-33928996			Promoter	No
Itri8:33929174-33929674	TSS	Mrps18b	Mrps18b Itri8:33929174-33929674			Promoter	No
Itri11:21545222-21545722	TSS	Mrps21	Mrps21 Itri11:21545222-21545722			Promoter	No
Itri11:21545923-21546423	TSS	Mrps21	Mrps21 Itri11:21545923-21546423			Promoter	No
Itri7:31879241-31879741	TSS	Mrps23	Mrps23 Itri7:31879241-31879741			Promoter	No
Itri4:161667828-161668328	TSS	Mrps31	Mrps31 Itri4:161667828-161668328			Promoter	No
Itri4:161668843-161669343	TSS	Mrps31	Mrps31 Itri4:161668843-161669343	0.314311	6.95403e-12	Promoter	No
Itri9:104488200-104488700	TSS	Mrps34	Mrps34 Itri9:104488200-104488700	0.283409	9.54137e-10	Promoter	Yes
Itri9:104488706-104489206	TSS	Mrps34	Mrps34 Itri9:104488706-104489206	0.448422	1.26718e-24	Promoter	Yes
Itri9:104489612-104490112	TSS	Mrps34	Mrps34 Itri9:104489612-104490112			Promoter	No
Itri1:191416906-191417406	TSS	Mrps36	Mrps36 Itri1:191416906-191417406	0.456603	1.30805e-25	Promoter	Yes
Itri1:191417411-191417911	TSS	Mrps36	Mrps36 Itri1:191417411-191417911	0.655005	2.70359e-60	Promoter	No
Itri1:191418480-191418980	TSS	Mrps36	Mrps36 Itri1:191418480-191418980			Other	No
Itri3:107006442-107006942	TSS	Msantd2	Msantd2 Itri3:107006442-107006942			Other	No
Itri17:6480097-6480597	TSS	Msra	Msra Itri17:6480097-6480597	0.546316	2.06953e-38	Promoter	No
Itri17:6480604-6481104	TSS	Msra	Msra Itri17:6480604-6481104	0.560748	7.40159e-41	PEs	No
Itri16:50724159-50724659	TSS	Mt3	Mt3 Itri16:50724159-50724659			Promoter	Yes
Itri16:50724885-50725385	TSS	Mt3	Mt3 Itri16:50724885-50725385			PEs	No
Itri6:37652573-37653073	TSS	Mtdh	Mtdh Itri6:37652573-37653073			Promoter	No
Itri6:37653319-37653819	TSS	Mtdh	Mtdh Itri6:37653319-37653819	-0.406081	6.21628e-20	Promoter	Yes
Itri6:37653871-37654371	TSS	Mtdh	Mtdh Itri6:37653871-37654371			Promoter	Yes
Itri6:192513286-192513786	TSS	Mterf4	Mterf4 Itri6:192513286-192513786			Promoter	No
Itri6:192513808-192514308	TSS	Mterf4	Mterf4 Itri6:192513808-192514308			Promoter	No
Itri6:192514339-192514839	TSS	Mterf4	Mterf4 Itri6:192514339-192514839			Promoter	No
Itri6:192514914-192515414	TSS	Mterf4	Mterf4 Itri6:192514914-192515414			Other	No
Itri1:6048191-6048691	TSS	Mtg1	Mtg1 Itri1:6048191-6048691			Other	No
Itri1:6048841-6049341	TSS	Mtg1	Mtg1 Itri1:6048841-6049341			Other	No
Itri4:173260372-173260872	TSS	Mtif3	Mtif3 Itri4:173260372-173260872			PEs	No
Itri4:173260985-173261485	TSS	Mtif3	Mtif3 Itri4:173260985-173261485			Promoter	No
Itri4:173261518-173262018	TSS	Mtif3	Mtif3 Itri4:173261518-173262018	0.303388	4.24927e-11	Promoter	No
Itri4:173262020-173262520	TSS	Mtif3	Mtif3 Itri4:173262020-173262520	0.460739	4.04903e-26	Promoter	No
Itri4:173262577-173263077	TSS	Mtif3	Mtif3 Itri4:173262577-173263077			Promoter	No
Itri2:18539312-18539812	TSS	Mtpn	Mtpn Itri2:18539312-18539812			AEs	No
Itri2:18539919-18540419	TSS	Mtpn	Mtpn Itri2:18539919-18540419	0.321438	2.04548e-12	Promoter	Yes
Itri2:18540424-18540924	TSS	Mtpn	Mtpn Itri2:18540424-18540924			Promoter	Yes
Itri8:138363161-138363661	TSS	Mtrf1l	Mtrf1l Itri8:138363161-138363661			Promoter	No
Itri8:138363685-138364185	TSS	Mtrf1l	Mtrf1l Itri8:138363685-138364185			Promoter	No
Itri8:138364434-138364934	TSS	Mtrf1l	Mtrf1l Itri8:138364434-138364934	0.398821	3.39701e-19	Promoter	No
Itri8:138365366-138365866	TSS	Mtrf1l	Mtrf1l Itri8:138365366-138365866			Other	No
Itri6:15535999-15536499	TSS	Mtss1	Mtss1 Itri6:15535999-15536499			Other	No
Itri6:15536509-15537009	TSS	Mtss1	Mtss1 Itri6:15536509-15537009			Other	No
Itri6:15537028-15537528	TSS	Mtss1	Mtss1 Itri6:15537028-15537528	0.379401	2.59822e-17	Promoter	Yes
Itri6:15537675-15538175	TSS	Mtss1	Mtss1 Itri6:15537675-15538175			Promoter	Yes
Itri2:87202741-87203241	TSS	Mturn	Mturn Itri2:87202741-87203241			Promoter	Yes
Itri2:87203315-87203815	TSS	Mturn	Mturn Itri2:87203315-87203815			PEs	No
Itri3:194410111-194410611	TSS	Mvb12b	Mvb12b Itri3:194410111-194410611			Other	Yes
Itri3:194410824-194411324	TSS	Mvb12b	Mvb12b Itri3:194410824-194411324			PEs	No
Itri7:4662353-4662853	TSS	Mxra7	Mxra7 Itri7:4662353-4662853	0.538737	3.56488e-37	PEs	No
Itri7:4663010-4663510	TSS	Mxra7	Mxra7 Itri7:4663010-4663510			AEs	No
Itri7:4663546-4664046	TSS	Mxra7	Mxra7 Itri7:4663546-4664046			AEs	No
Itri11:27674685-27675185	TSS	Mxra8	Mxra8 Itri11:27674685-27675185	0.486786	1.70931e-29	Promoter	Yes
Itri11:27675285-27675785	TSS	Mxra8	Mxra8 Itri11:27675285-27675785	0.740361	3.57138e-85	Promoter	Yes
Itri11:27676081-27676581	TSS	Mxra8	Mxra8 Itri11:27676081-27676581			AEs	No
Itri6:67388853-67389353	TSS	Mybl1	Mybl1 Itri6:67388853-67389353			Promoter	No
Itri6:67389372-67389872	TSS	Mybl1	Mybl1 Itri6:67389372-67389872	0.390174	2.43067e-18	Promoter	Yes
Itri6:67390903-67391403	TSS	Mybl1	Mybl1 Itri6:67390903-67391403			Promoter	No
Itri13:66219899-66220399	TSS	MYL12B	MYL12B Itri13:66219899-66220399			Promoter	Yes
Itri13:66220455-66220955	TSS	MYL12B	MYL12B Itri13:66220455-66220955			Promoter	No
Itri4:58301957-58302457	TSS	Myl6	Myl6 Itri4:58301957-58302457			Promoter	Yes
Itri4:58302843-58303343	TSS	Myl6	Myl6 Itri4:58302843-58303343	0.45239	4.24635e-25	Promoter	Yes
Itri4:58303445-58303945	TSS	Myl6	Myl6 Itri4:58303445-58303945	0.252231	7.46232e-08	Promoter	Yes
Itri4:58303984-58304484	TSS	Myl6	Myl6 Itri4:58303984-58304484	0.441138	9.10014e-24	AEs	Yes
Itri4:58306604-58307104	TSS	Myl6b	Myl6b Itri4:58306604-58307104			Promoter	Yes
Itri4:58307145-58307645	TSS	Myl6b	Myl6b Itri4:58307145-58307645	-0.342259	4.69837e-14	Promoter	Yes
Itri4:58307664-58308164	TSS	Myl6b	Myl6b Itri4:58307664-58308164	-0.271968	5.06111e-09	Promoter	No
Itri4:58308325-58308825	TSS	Myl6b	Myl6b Itri4:58308325-58308825			PEs	No
Itri8:9404368-9404868	TSS	Mylip	Mylip Itri8:9404368-9404868	0.54871	8.28412e-39	Promoter	Yes
Itri8:9405630-9406130	TSS	Mylip	Mylip Itri8:9405630-9406130	0.704098	1.64931e-73	Promoter	Yes
Itri8:9406357-9406857	TSS	Mylip	Mylip Itri8:9406357-9406857			PEs	Yes
Itri7:100975581-100976081	TSS	Mynn	Mynn Itri7:100975581-100976081			Promoter	Yes
Itri7:100976767-100977267	TSS	Mynn	Mynn Itri7:100976767-100977267	0.251035	8.71667e-08	Promoter	Yes
Itri7:100977322-100977822	TSS	Mynn	Mynn Itri7:100977322-100977822			Promoter	Yes
Itri1:210507077-210507577	TSS	Myo10	Myo10 Itri1:210507077-210507577			PEs	No
Itri10:119078735-119079235	TSS	Naa10	Naa10 Itri10:119078735-119079235			Promoter	Yes
Itri10:119079322-119079822	TSS	Naa10	Naa10 Itri10:119079322-119079822			Promoter	Yes
Itri10:119079858-119080358	TSS	Naa10	Naa10 Itri10:119079858-119080358			Promoter	Yes
Itri7:47626684-47627184	TSS	Naa38	Naa38 Itri7:47626684-47627184			Promoter	Yes
Itri7:47627300-47627800	TSS	Naa38	Naa38 Itri7:47627300-47627800			Promoter	Yes
Itri7:47627993-47628493	TSS	Naa38	Naa38 Itri7:47627993-47628493			Promoter	Yes
Itri7:47628666-47629166	TSS	Naa38	Naa38 Itri7:47628666-47629166			Promoter	No
Itri6:149289144-149289644	TSS	Nab1	Nab1 Itri6:149289144-149289644			Promoter	No
Itri6:149289780-149290280	TSS	Nab1	Nab1 Itri6:149289780-149290280	0.528744	1.36887e-35	Promoter	Yes
Itri4:111726362-111726862	TSS	NAB1	NAB1 Itri4:111726362-111726862			Other	No
Itri1:225785402-225785902	TSS	Nadk2	Nadk2 Itri1:225785402-225785902			Promoter	No
Itri1:225786037-225786537	TSS	Nadk2	Nadk2 Itri1:225786037-225786537	0.815524	4.88534e-117	Promoter	Yes
Itri1:225786648-225787148	TSS	Nadk2	Nadk2 Itri1:225786648-225787148	0.546398	2.00527e-38	Promoter	Yes
Itri17:16177263-16177763	TSS	Naf1	Naf1 Itri17:16177263-16177763			Promoter	Yes
Itri17:16177810-16178310	TSS	Naf1	Naf1 Itri17:16177810-16178310	0.262537	1.88558e-08	Promoter	Yes
Itri17:16178390-16178890	TSS	Naf1	Naf1 Itri17:16178390-16178890			AEs	No
Itri12:13386707-13387207	TSS	Nagk	Nagk Itri12:13386707-13387207	0.351427	8.09921e-15	Promoter	No
Itri12:13387303-13387803	TSS	Nagk	Nagk Itri12:13387303-13387803	-0.274398	3.57589e-09	Promoter	Yes
Itri12:13387999-13388499	TSS	Nagk	Nagk Itri12:13387999-13388499			Promoter	No
Itri12:13388703-13389203	TSS	Nagk	Nagk Itri12:13388703-13389203			PEs	No
Itri3:170224867-170225367	TSS	Nans	Nans Itri3:170224867-170225367	0.288171	4.65063e-10	Other	No
Itri3:170225394-170225894	TSS	Nans	Nans Itri3:170225394-170225894	0.50942	1.12393e-32	Promoter	Yes
Itri3:170225903-170226403	TSS	Nans	Nans Itri3:170225903-170226403	0.478936	1.91254e-28	Promoter	Yes
Itri10:69948459-69948959	TSS	Nap1l3	Nap1l3 Itri10:69948459-69948959			Promoter	No
Itri10:69948978-69949478	TSS	Nap1l3	Nap1l3 Itri10:69948978-69949478			Promoter	Yes
Itri10:69949589-69950089	TSS	Nap1l3	Nap1l3 Itri10:69949589-69950089			Promoter	Yes
Itri6:1127670-1128170	TSS	Naprt	Naprt Itri6:1127670-1128170	0.322343	1.74686e-12	Other	No
Itri6:1128293-1128793	TSS	Naprt	Naprt Itri6:1128293-1128793	0.540991	1.54076e-37	Promoter	Yes
Itri6:1128834-1129334	TSS	Naprt	Naprt Itri6:1128834-1129334	0.285713	6.75131e-10	Promoter	Yes
Itri6:1129349-1129849	TSS	Naprt	Naprt Itri6:1129349-1129849			Other	No
Itri16:1846435-1846935	TSS	Nat14	Nat14 Itri16:1846435-1846935			AEs	No
Itri16:1846991-1847491	TSS	Nat14	Nat14 Itri16:1846991-1847491			Promoter	Yes
Itri16:1847571-1848071	TSS	Nat14	Nat14 Itri16:1847571-1848071	0.495082	1.2421e-30	Promoter	Yes
Itri16:1848260-1848760	TSS	Nat14	Nat14 Itri16:1848260-1848760			PEs	No
Itri12:55898439-55898939	TSS	Nbas	Nbas Itri12:55898439-55898939			Promoter	No
Itri7:143016232-143016732	TSS	Ncbp2	Ncbp2 Itri7:143016232-143016732	0.47635	4.17581e-28	Promoter	No
Itri7:143017156-143017656	TSS	Ncbp2	Ncbp2 Itri7:143017156-143017656			Promoter	Yes
Itri7:143017913-143018413	TSS	Ncbp2	Ncbp2 Itri7:143017913-143018413	0.331369	3.50898e-13	Promoter	Yes
Itri12:86761181-86761681	TSS	Nck2	Nck2 Itri12:86761181-86761681	-0.769694	3.79105e-96	Other	No
Itri12:86762302-86762802	TSS	Nck2	Nck2 Itri12:86762302-86762802			Other	No
Itri6:84853826-84854326	TSS	Nckap5	Nckap5 Itri6:84853826-84854326	0.416699	4.79008e-21	AEs	No
Itri6:84854954-84855454	TSS	Nckap5	Nckap5 Itri6:84854954-84855454	0.358209	2.12422e-15	Promoter	No
Itri6:84855565-84856065	TSS	Nckap5	Nckap5 Itri6:84855565-84856065	0.325998	9.18087e-13	Promoter	No
Itri12:63234246-63234746	TSS	Ncoa1	Ncoa1 Itri12:63234246-63234746			Promoter	Yes
Itri1:79172983-79173483	TSS	Ncoa4	Ncoa4 Itri1:79172983-79173483			Other	No
Itri1:79173946-79174446	TSS	Ncoa4	Ncoa4 Itri1:79173946-79174446			Promoter	Yes
Itri1:79174670-79175170	TSS	Ncoa4	Ncoa4 Itri1:79174670-79175170			Promoter	Yes
Itri8:114739792-114740292	TSS	Ncoa7	Ncoa7 Itri8:114739792-114740292			AEs	No
Itri8:114740369-114740869	TSS	Ncoa7	Ncoa7 Itri8:114740369-114740869			Promoter	Yes
Itri8:114741041-114741541	TSS	Ncoa7	Ncoa7 Itri8:114741041-114741541			Promoter	Yes
Itri1:150528544-150529044	TSS	Ndfip1	Ndfip1 Itri1:150528544-150529044			Promoter	No
Itri1:150529359-150529859	TSS	Ndfip1	Ndfip1 Itri1:150529359-150529859			Promoter	Yes
Itri1:150530202-150530702	TSS	Ndfip1	Ndfip1 Itri1:150530202-150530702			Other	No
Itri5:32317200-32317700	TSS	Ndrg2	Ndrg2 Itri5:32317200-32317700	0.823111	4.64488e-121	Promoter	No
Itri5:32318207-32318707	TSS	Ndrg2	Ndrg2 Itri5:32318207-32318707	0.513979	2.39993e-33	Promoter	Yes
Itri5:32318782-32319282	TSS	Ndrg2	Ndrg2 Itri5:32318782-32319282			PEs	No
Itri1:56836492-56836992	TSS	Ndst2	Ndst2 Itri1:56836492-56836992			Other	No
Itri2:214443646-214444146	TSS	Ndufa11	Ndufa11 Itri2:214443646-214444146	0.726624	1.56224e-80	Promoter	No
Itri2:214444169-214444669	TSS	Ndufa11	Ndufa11 Itri2:214444169-214444669			Promoter	No
Itri2:214444688-214445188	TSS	Ndufa11	Ndufa11 Itri2:214444688-214445188	0.447585	1.59303e-24	Promoter	No
Itri2:214445256-214445756	TSS	Ndufa11	Ndufa11 Itri2:214445256-214445756			Promoter	No
Itri2:202404469-202404969	TSS	Ndufa13	Ndufa13 Itri2:202404469-202404969			Promoter	Yes
Itri2:202405015-202405515	TSS	Ndufa13	Ndufa13 Itri2:202405015-202405515			Promoter	Yes
Itri2:14506972-14507472	TSS	Ndufb2	Ndufb2 Itri2:14506972-14507472			Promoter	No
Itri2:14507484-14507984	TSS	Ndufb2	Ndufb2 Itri2:14507484-14507984	0.597401	1.19818e-47	Promoter	Yes
Itri2:14508022-14508522	TSS	Ndufb2	Ndufb2 Itri2:14508022-14508522	0.542609	8.39869e-38	Promoter	No
Itri7:130228860-130229360	TSS	Ndufb4	Ndufb4 Itri7:130228860-130229360			PEs	No
Itri7:130229583-130230083	TSS	Ndufb4	Ndufb4 Itri7:130229583-130230083	0.445713	2.65198e-24	Promoter	Yes
Itri7:130230149-130230649	TSS	Ndufb4	Ndufb4 Itri7:130230149-130230649	0.552629	1.82261e-39	Promoter	Yes
Itri7:130230782-130231282	TSS	Ndufb4	Ndufb4 Itri7:130230782-130231282			Other	No
Itri3:164695655-164696155	TSS	Ndufb6	Ndufb6 Itri3:164695655-164696155			Promoter	No
Itri3:164696329-164696829	TSS	Ndufb6	Ndufb6 Itri3:164696329-164696829			Promoter	Yes
Itri3:164696980-164697480	TSS	Ndufb6	Ndufb6 Itri3:164696980-164697480			Other	No
Itri3:65036882-65037382	TSS	Ndufc2	Ndufc2 Itri3:65036882-65037382	-0.378306	3.28927e-17	Promoter	No
Itri3:65037400-65037900	TSS	Ndufc2	Ndufc2 Itri3:65037400-65037900			Promoter	Yes
Itri3:19562239-19562739	TSS	Ndufs3	Ndufs3 Itri3:19562239-19562739			Promoter	No
Itri3:19562928-19563428	TSS	Ndufs3	Ndufs3 Itri3:19562928-19563428			Promoter	Yes
Itri3:19563487-19563987	TSS	Ndufs3	Ndufs3 Itri3:19563487-19563987	-0.661537	6.587e-62	Promoter	No
Itri11:55179745-55180245	TSS	Ndufs5	Ndufs5 Itri11:55179745-55180245	0.563067	2.91646e-41	Promoter	Yes
Itri11:55180269-55180769	TSS	Ndufs5	Ndufs5 Itri11:55180269-55180769	0.553435	1.33115e-39	Promoter	No
Itri3:5642582-5643082	TSS	Ndufs8	Ndufs8 Itri3:5642582-5643082	0.304159	3.74896e-11	Promoter	No
Itri3:5643177-5643677	TSS	Ndufs8	Ndufs8 Itri3:5643177-5643677	0.448184	1.35241e-24	Promoter	Yes
Itri3:5643718-5644218	TSS	Ndufs8	Ndufs8 Itri3:5643718-5644218			Promoter	No
Itri3:5644292-5644792	TSS	Ndufs8	Ndufs8 Itri3:5644292-5644792			Other	No
Itri13:31080423-31080923	TSS	Nedd4l	Nedd4l Itri13:31080423-31080923			PEs	No
Itri17:10388121-10388621	TSS	Nefl	Nefl Itri17:10388121-10388621			PEs	No
Itri17:10389167-10389667	TSS	Nefl	Nefl Itri17:10389167-10389667			Promoter	Yes
Itri17:10389674-10390174	TSS	Nefl	Nefl Itri17:10389674-10390174			Promoter	Yes
Itri11:84376028-84376528	TSS	Negr1	Negr1 Itri11:84376028-84376528	0.279297	1.75487e-09	Promoter	Yes
Itri11:84376866-84377366	TSS	Negr1	Negr1 Itri11:84376866-84377366	0.316853	4.51145e-12	Promoter	Yes
Itri11:84377716-84378216	TSS	Negr1	Negr1 Itri11:84377716-84378216	0.461482	3.27416e-26	Promoter	Yes
Itri4:69938583-69939083	TSS	Nell2	Nell2 Itri4:69938583-69939083			Promoter	Yes
Itri4:69939140-69939640	TSS	Nell2	Nell2 Itri4:69939140-69939640	0.255272	5.00485e-08	Promoter	Yes
Itri4:69939716-69940216	TSS	Nell2	Nell2 Itri4:69939716-69940216	0.44483	3.36994e-24	Promoter	Yes
Itri4:60819324-60819824	TSS	Neurod4	Neurod4 Itri4:60819324-60819824	0.332683	2.7655e-13	Promoter	No
Itri4:60820031-60820531	TSS	Neurod4	Neurod4 Itri4:60820031-60820531	0.70003	2.59829e-72	Promoter	Yes
Itri4:60820883-60821383	TSS	Neurod4	Neurod4 Itri4:60820883-60821383			PEs	No
Itri7:23794829-23795329	TSS	Nfe2l1	Nfe2l1 Itri7:23794829-23795329			Other	No
Itri7:23795551-23796051	TSS	Nfe2l1	Nfe2l1 Itri7:23795551-23796051			Promoter	Yes
Itri7:23796118-23796618	TSS	Nfe2l1	Nfe2l1 Itri7:23796118-23796618			Promoter	Yes
Itri7:23796688-23797188	TSS	Nfe2l1	Nfe2l1 Itri7:23796688-23797188			Promoter	No
Itri11:6475218-6475718	TSS	Nhlh1	Nhlh1 Itri11:6475218-6475718			PEs	No
Itri11:6475737-6476237	TSS	Nhlh1	Nhlh1 Itri11:6475737-6476237	0.791128	2.9139e-105	AEs	Yes
Itri11:6476447-6476947	TSS	Nhlh1	Nhlh1 Itri11:6476447-6476947			Promoter	Yes
Itri11:6479724-6480224	TSS	NHLH1	NHLH1 Itri11:6479724-6480224			PEs	No
Itri11:6480259-6480759	TSS	NHLH1	NHLH1 Itri11:6480259-6480759			AEs	No
Itri11:6481338-6481838	TSS	NHLH1	NHLH1 Itri11:6481338-6481838			Other	No
Itri8:125919363-125919863	TSS	Nhsl1	Nhsl1 Itri8:125919363-125919863			Promoter	Yes
Itri8:125920160-125920660	TSS	Nhsl1	Nhsl1 Itri8:125920160-125920660			Promoter	Yes
Itri8:125921148-125921648	TSS	Nhsl1	Nhsl1 Itri8:125921148-125921648	0.568115	3.73969e-42	PEs	No
Itri13:8314583-8315083	TSS	Ninj1	Ninj1 Itri13:8314583-8315083	0.464669	1.30958e-26	Other	No
Itri13:8315176-8315676	TSS	Ninj1	Ninj1 Itri13:8315176-8315676			Other	No
Itri13:8316282-8316782	TSS	Ninj1	Ninj1 Itri13:8316282-8316782			Other	No
Itri10:90962198-90962698	TSS	Nkap	Nkap Itri10:90962198-90962698	-0.252275	7.41979e-08	Promoter	Yes
Itri10:90962699-90963199	TSS	Nkap	Nkap Itri10:90962699-90963199			Promoter	Yes
Itri2:182432381-182432881	TSS	Nkiras1	Nkiras1 Itri2:182432381-182432881			Promoter	No
Itri2:182433142-182433642	TSS	Nkiras1	Nkiras1 Itri2:182433142-182433642	0.607369	1.19068e-49	Promoter	Yes
Itri2:182433734-182434234	TSS	Nkiras1	Nkiras1 Itri2:182433734-182434234	0.380405	2.09155e-17	Promoter	No
Itri2:182434292-182434792	TSS	Nkiras1	Nkiras1 Itri2:182434292-182434792	0.2505	9.34275e-08	Promoter	Yes
Itri7:47213626-47214126	TSS	Nlgn2	Nlgn2 Itri7:47213626-47214126	-0.331341	3.52717e-13	Promoter	Yes
Itri7:47214271-47214771	TSS	Nlgn2	Nlgn2 Itri7:47214271-47214771	-0.312575	9.32193e-12	Promoter	Yes
Itri7:47215039-47215539	TSS	Nlgn2	Nlgn2 Itri7:47215039-47215539			Promoter	Yes
Itri5:129619031-129619531	TSS	Nmb	Nmb Itri5:129619031-129619531	0.697218	1.69996e-71	Promoter	Yes
Itri5:129619874-129620374	TSS	Nmb	Nmb Itri5:129619874-129620374			Other	No
Itri7:26433987-26434487	TSS	Nme2	Nme2 Itri7:26433987-26434487			PEs	No
Itri7:26434607-26435107	TSS	Nme2	Nme2 Itri7:26434607-26435107			Promoter	No
Itri7:26435287-26435787	TSS	Nme2	Nme2 Itri7:26435287-26435787	0.533874	2.13782e-36	Promoter	Yes
Itri7:26435806-26436306	TSS	Nme2	Nme2 Itri7:26435806-26436306	0.569405	2.20179e-42	Promoter	Yes
Itri9:104486553-104487053	TSS	Nme3	Nme3 Itri9:104486553-104487053	0.369905	1.94865e-16	Promoter	Yes
Itri9:104488200-104488700	TSS	Nme3	Nme3 Itri9:104488200-104488700			Promoter	Yes
Itri5:175004702-175005202	TSS	Nnat	Nnat Itri5:175004702-175005202			AEs	No
Itri5:175005241-175005741	TSS	Nnat	Nnat Itri5:175005241-175005741			PEs	No
Itri5:175005748-175006248	TSS	Nnat	Nnat Itri5:175005748-175006248	0.487114	1.54311e-29	AEs	No
Itri5:175006502-175007002	TSS	Nnat	Nnat Itri5:175006502-175007002	0.395676	6.99919e-19	PEs	Yes
Itri1:39149211-39149711	TSS	Noc3l	Noc3l Itri1:39149211-39149711			PEs	No
Itri1:39150070-39150570	TSS	Noc3l	Noc3l Itri1:39150070-39150570			Promoter	Yes
Itri1:39150769-39151269	TSS	Noc3l	Noc3l Itri1:39150769-39151269			Promoter	No
Itri13:51340063-51340563	TSS	Nol4	Nol4 Itri13:51340063-51340563			Promoter	Yes
Itri13:51340618-51341118	TSS	Nol4	Nol4 Itri13:51340618-51341118	0.303257	4.34069e-11	Promoter	Yes
[truncated: 16,041 more rows]

## Sheet: Mouse
peaks	class	gene	index	Correlation	FDR	Class	conserved
chr11:116592452-116592952	TSS	Aanat	Aanat chr11:116592452-116592952			AEs	Yes
chr11:116593332-116593832	TSS	Aanat	Aanat chr11:116593332-116593832			AEs	Yes
chr11:116594471-116594971	TSS	Aanat	Aanat chr11:116594471-116594971			PEs	No
chr11:101416334-101416834	TSS	Aarsd1	Aarsd1 chr11:101416334-101416834			Promoter	No
chr11:101417172-101417672	TSS	Aarsd1	Aarsd1 chr11:101417172-101417672	0.289652	3.62154e-10	Promoter	Yes
chr5:76904639-76905139	TSS	Aasdh	Aasdh chr5:76904639-76905139			Promoter	No
chr5:76905203-76905703	TSS	Aasdh	Aasdh chr5:76905203-76905703	-0.621249	1.48377e-52	Promoter	No
chr5:76905806-76906306	TSS	Aasdh	Aasdh chr5:76905806-76906306			Promoter	No
chr11:84513320-84513820	TSS	Aatf	Aatf chr11:84513320-84513820			Promoter	Yes
chr4:53158588-53159088	TSS	Abca1	Abca1 chr4:53158588-53159088			Promoter	No
chr4:53159153-53159653	TSS	Abca1	Abca1 chr4:53159153-53159653			Promoter	Yes
chr4:53159784-53160284	TSS	Abca1	Abca1 chr4:53159784-53160284	0.327081	7.39406e-13	Promoter	Yes
chrX:104413106-104413606	TSS	Abcb7	Abcb7 chrX:104413106-104413606			Promoter	No
chrX:104413649-104414149	TSS	Abcb7	Abcb7 chrX:104413649-104414149			Promoter	Yes
chr9:44286925-44287425	TSS	Abcg4	Abcg4 chr9:44286925-44287425			Promoter	Yes
chr9:44287473-44287973	TSS	Abcg4	Abcg4 chr9:44287473-44287973	0.434389	5.33978e-23	Promoter	Yes
chr9:44288110-44288610	TSS	Abcg4	Abcg4 chr9:44288110-44288610	0.35604	3.20054e-15	Promoter	Yes
chr9:44288933-44289433	TSS	Abcg4	Abcg4 chr9:44288933-44289433			Promoter	Yes
chr5:135008342-135008842	TSS	Abhd11	Abhd11 chr5:135008342-135008842			Promoter	Yes
chr5:135008867-135009367	TSS	Abhd11	Abhd11 chr5:135008867-135009367			Promoter	No
chr5:135009617-135010117	TSS	Abhd11	Abhd11 chr5:135009617-135010117			Promoter	Yes
chr14:8002656-8003156	TSS	Abhd6	Abhd6 chr14:8002656-8003156			Promoter	Yes
chr14:8003388-8003888	TSS	Abhd6	Abhd6 chr14:8003388-8003888			Promoter	No
chr11:76577808-76578308	TSS	Abr	Abr chr11:76577808-76578308			Other	No
chr1:90203683-90204183	TSS	Ackr3	Ackr3 chr1:90203683-90204183			PEs	Yes
chr1:90204305-90204805	TSS	Ackr3	Ackr3 chr1:90204305-90204805			PEs	Yes
chr11:100527008-100527508	TSS	Acly	Acly chr11:100527008-100527508			Promoter	Yes
chr11:100527731-100528231	TSS	Acly	Acly chr11:100527731-100528231			Promoter	Yes
chr11:100528277-100528777	TSS	Acly	Acly chr11:100528277-100528777			Promoter	Yes
chr12:30910953-30911453	TSS	Acp1	Acp1 chr12:30910953-30911453			Promoter	No
chr12:30911494-30911994	TSS	Acp1	Acp1 chr12:30911494-30911994	-0.374742	6.91243e-17	Promoter	No
chr12:30912435-30912935	TSS	Acp1	Acp1 chr12:30912435-30912935			PEs	No
chr2:114052555-114053055	TSS	Actc1	Actc1 chr2:114052555-114053055			PEs	Yes
chr2:114053102-114053602	TSS	Actc1	Actc1 chr2:114053102-114053602			PEs	Yes
chr5:137553231-137553731	TSS	Actl6b	Actl6b chr5:137553231-137553731	0.402501	1.41985e-19	Promoter	Yes
chr12:85279689-85280189	TSS	Acyp1	Acyp1 chr12:85279689-85280189			Promoter	No
chr12:85280191-85280691	TSS	Acyp1	Acyp1 chr12:85280191-85280691			Promoter	Yes
chr18:58835972-58836472	TSS	Adamts19	Adamts19 chr18:58835972-58836472	0.327435	6.94372e-13	Promoter	Yes
chr18:58836757-58837257	TSS	Adamts19	Adamts19 chr18:58836757-58837257	0.356515	2.91285e-15	Promoter	No
chr18:58837542-58838042	TSS	Adamts19	Adamts19 chr18:58837542-58838042			PEs	Yes
chr5:89882037-89882537	TSS	Adamts3	Adamts3 chr5:89882037-89882537			Promoter	Yes
chr5:89882607-89883107	TSS	Adamts3	Adamts3 chr5:89882607-89883107			Promoter	Yes
chr5:89883151-89883651	TSS	Adamts3	Adamts3 chr5:89883151-89883651			Promoter	Yes
chr5:89883781-89884281	TSS	Adamts3	Adamts3 chr5:89883781-89884281			PEs	Yes
chr5:89884297-89884797	TSS	Adamts3	Adamts3 chr5:89884297-89884797			PEs	No
chr13:104286771-104287271	TSS	Adamts6	Adamts6 chr13:104286771-104287271	0.256187	4.3384e-08	Promoter	Yes
chr13:104287993-104288493	TSS	Adamts6	Adamts6 chr13:104287993-104288493			Promoter	Yes
chr10:77417227-77417727	TSS	Adarb1	Adarb1 chr10:77417227-77417727			Promoter	No
chr10:77417984-77418484	TSS	Adarb1	Adarb1 chr10:77417984-77418484			Promoter	Yes
chr10:77418621-77419121	TSS	Adarb1	Adarb1 chr10:77418621-77419121			Promoter	No
chr8:27084761-27085261	TSS	Adgra2	Adgra2 chr8:27084761-27085261			PEs	Yes
chr8:27085286-27085786	TSS	Adgra2	Adgra2 chr8:27085286-27085786			Promoter	Yes
chr8:27085812-27086312	TSS	Adgra2	Adgra2 chr8:27085812-27086312			Promoter	Yes
chr8:27086435-27086935	TSS	Adgra2	Adgra2 chr8:27086435-27086935			Promoter	No
chr13:81631856-81632356	TSS	Adgrv1	Adgrv1 chr13:81631856-81632356			Promoter	No
chr13:81632995-81633495	TSS	Adgrv1	Adgrv1 chr13:81632995-81633495			Promoter	Yes
chr13:81633522-81634022	TSS	Adgrv1	Adgrv1 chr13:81633522-81634022			PEs	No
chr12:28674532-28675032	TSS	Adi1	Adi1 chr12:28674532-28675032			PEs	No
chr12:28675080-28675580	TSS	Adi1	Adi1 chr12:28675080-28675580	-0.326582	8.08118e-13	Promoter	No
chr12:28675582-28676082	TSS	Adi1	Adi1 chr12:28675582-28676082			PEs	No
chr2:168206082-168206582	TSS	Adnp	Adnp chr2:168206082-168206582			Promoter	No
chr2:168206666-168207166	TSS	Adnp	Adnp chr2:168206666-168207166			Promoter	No
chr2:168207232-168207732	TSS	Adnp	Adnp chr2:168207232-168207732			Promoter	No
chr10:81559194-81559694	TSS	Aes	Aes chr10:81559194-81559694			Promoter	Yes
chr10:81560173-81560673	TSS	Aes	Aes chr10:81560173-81560673			Promoter	Yes
chrX:69360063-69360563	TSS	Aff2	Aff2 chrX:69360063-69360563			Promoter	No
chrX:69360694-69361194	TSS	Aff2	Aff2 chrX:69360694-69361194			Promoter	Yes
chrX:69361310-69361810	TSS	Aff2	Aff2 chrX:69361310-69361810			PEs	No
chr11:53349940-53350440	TSS	Aff4	Aff4 chr11:53349940-53350440			Promoter	No
chr11:53350541-53351041	TSS	Aff4	Aff4 chr11:53350541-53351041			Promoter	Yes
chr11:53351555-53352055	TSS	Aff4	Aff4 chr11:53351555-53352055	0.259111	2.9345e-08	Promoter	Yes
chr8:53511483-53511983	TSS	Aga	Aga chr8:53511483-53511983			Promoter	Yes
chr1:89453919-89454419	TSS	Agap1	Agap1 chr1:89453919-89454419			Promoter	No
chr1:89454470-89454970	TSS	Agap1	Agap1 chr1:89454470-89454970	-0.272529	4.56502e-09	Promoter	Yes
chr1:89455547-89456047	TSS	Agap1	Agap1 chr1:89455547-89456047			Promoter	Yes
chr5:30887795-30888295	TSS	Agbl5	Agbl5 chr5:30887795-30888295			Promoter	Yes
chr5:30888330-30888830	TSS	Agbl5	Agbl5 chr5:30888330-30888830	0.264829	1.34558e-08	Promoter	Yes
chr5:30888853-30889353	TSS	Agbl5	Agbl5 chr5:30888853-30889353	0.268222	8.39295e-09	Promoter	Yes
chr5:30889364-30889864	TSS	Agbl5	Agbl5 chr5:30889364-30889864			Promoter	Yes
chr2:75831517-75832017	TSS	Agps	Agps chr2:75831517-75832017			Promoter	No
chr2:75832247-75832747	TSS	Agps	Agps chr2:75832247-75832747			Promoter	Yes
chr2:75832834-75833334	TSS	Agps	Agps chr2:75832834-75833334			Promoter	No
chr10:20951690-20952190	TSS	Ahi1	Ahi1 chr10:20951690-20952190			Promoter	No
chr10:20952337-20952837	TSS	Ahi1	Ahi1 chr10:20952337-20952837	0.269967	6.56631e-09	Promoter	Yes
chr10:20952843-20953343	TSS	Ahi1	Ahi1 chr10:20952843-20953343			Promoter	No
chr12:87265399-87265899	TSS	Ahsa1	Ahsa1 chr12:87265399-87265899			Promoter	Yes
chr12:87266034-87266534	TSS	Ahsa1	Ahsa1 chr12:87266034-87266534			Promoter	Yes
chr12:87266691-87267191	TSS	Ahsa1	Ahsa1 chr12:87266691-87267191			Promoter	Yes
chr12:87267684-87268184	TSS	Ahsa1	Ahsa1 chr12:87267684-87268184			Promoter	Yes
chr10:13868202-13868702	TSS	Aig1	Aig1 chr10:13868202-13868702	0.363591	7.01644e-16	Promoter	Yes
chr10:13868712-13869212	TSS	Aig1	Aig1 chr10:13868712-13869212	0.541816	1.13839e-37	Promoter	Yes
chr2:32620619-32621119	TSS	Ak1	Ak1 chr2:32620619-32621119			AEs	No
chr2:32621129-32621629	TSS	Ak1	Ak1 chr2:32621129-32621629	0.45021	7.67626e-25	AEs	No
chr5:3926594-3927094	TSS	Akap9	Akap9 chr5:3926594-3927094			PEs	No
chr5:3927970-3928470	TSS	Akap9	Akap9 chr5:3927970-3928470			Promoter	Yes
chr5:3928660-3929160	TSS	Akap9	Akap9 chr5:3928660-3929160			Promoter	Yes
chr4:123749338-123749838	TSS	Akirin1	Akirin1 chr4:123749338-123749838			Promoter	Yes
chr4:123750165-123750665	TSS	Akirin1	Akirin1 chr4:123750165-123750665			Promoter	Yes
chr4:123750671-123751171	TSS	Akirin1	Akirin1 chr4:123750671-123751171			Promoter	Yes
chr4:63409985-63410485	TSS	Akna	Akna chr4:63409985-63410485			Promoter	Yes
chr4:63410518-63411018	TSS	Akna	Akna chr4:63410518-63411018			Promoter	Yes
chr12:112673398-112673898	TSS	Akt1	Akt1 chr12:112673398-112673898			Promoter	Yes
chr12:112673907-112674407	TSS	Akt1	Akt1 chr12:112673907-112674407			Promoter	Yes
chr12:112674605-112675105	TSS	Akt1	Akt1 chr12:112674605-112675105			Promoter	No
chr12:112675258-112675758	TSS	Akt1	Akt1 chr12:112675258-112675758			Promoter	Yes
chr5:121593341-121593841	TSS	Aldh2	Aldh2 chr5:121593341-121593841	0.289953	3.45863e-10	Promoter	Yes
chr5:121593897-121594397	TSS	Aldh2	Aldh2 chr5:121593897-121594397			Promoter	No
chr1:167349148-167349648	TSS	Aldh9a1	Aldh9a1 chr1:167349148-167349648			Other	No
chr1:167349832-167350332	TSS	Aldh9a1	Aldh9a1 chr1:167349832-167350332	-0.254138	5.6886e-08	Promoter	No
chr1:167350437-167350937	TSS	Aldh9a1	Aldh9a1 chr1:167350437-167350937			Promoter	No
chr11:78322833-78323333	TSS	Aldoc	Aldoc chr11:78322833-78323333	0.653842	5.22257e-60	PEs	Yes
chr11:78323934-78324434	TSS	Aldoc	Aldoc chr11:78323934-78324434			Other	Yes
chr15:88819092-88819592	TSS	Alg12	Alg12 chr15:88819092-88819592			Promoter	Yes
chr15:88819769-88820269	TSS	Alg12	Alg12 chr15:88819769-88820269			Promoter	Yes
chrX:144317201-144317701	TSS	Alg13	Alg13 chrX:144317201-144317701			Promoter	No
chrX:144317720-144318220	TSS	Alg13	Alg13 chrX:144317720-144318220			Promoter	Yes
chrX:144318612-144319112	TSS	Alg13	Alg13 chrX:144318612-144319112			Promoter	No
chr9:50775217-50775717	TSS	Alg9	Alg9 chr9:50775217-50775717			Promoter	No
chr9:50775832-50776332	TSS	Alg9	Alg9 chr9:50775832-50776332			Promoter	No
chr9:110879863-110880363	TSS	Als2cl	Als2cl chr9:110879863-110880363			Other	Yes
chr9:110880580-110881080	TSS	Als2cl	Als2cl chr9:110880580-110881080			Other	Yes
chr9:14642686-14643186	TSS	Amotl1	Amotl1 chr9:14642686-14643186			PEs	No
chr10:60002040-60002540	TSS	Anapc16	Anapc16 chr10:60002040-60002540			Promoter	Yes
chr10:60002885-60003385	TSS	Anapc16	Anapc16 chr10:60002885-60003385			Promoter	Yes
chr10:60003502-60004002	TSS	Anapc16	Anapc16 chr10:60003502-60004002			Promoter	Yes
chr1:156838563-156839063	TSS	Angptl1	Angptl1 chr1:156838563-156839063			AEs	Yes
chr3:127498099-127498599	TSS	Ank2	Ank2 chr3:127498099-127498599	-0.341597	5.20163e-14	Promoter	Yes
chr3:127498953-127499453	TSS	Ank2	Ank2 chr3:127498953-127499453			Promoter	Yes
chr10:69533415-69533915	TSS	Ank3	Ank3 chr10:69533415-69533915			Promoter	Yes
chr10:69534040-69534540	TSS	Ank3	Ank3 chr10:69534040-69534540			Promoter	Yes
chr10:69534581-69535081	TSS	Ank3	Ank3 chr10:69534581-69535081			Promoter	No
chr17:66076115-66076615	TSS	Ankrd12	Ankrd12 chr17:66076115-66076615	0.319519	2.78604e-12	Promoter	Yes
chr17:66076865-66077365	TSS	Ankrd12	Ankrd12 chr17:66076865-66077365	0.535799	1.06127e-36	Promoter	Yes
chr17:66077504-66078004	TSS	Ankrd12	Ankrd12 chr17:66077504-66078004			Promoter	No
chr14:31829760-31830260	TSS	Ankrd28	Ankrd28 chr14:31829760-31830260			Promoter	Yes
chr14:31830485-31830985	TSS	Ankrd28	Ankrd28 chr14:31830485-31830985			Promoter	Yes
chr14:31831168-31831668	TSS	Ankrd28	Ankrd28 chr14:31831168-31831668			Promoter	Yes
chr3:38483455-38483955	TSS	Ankrd50	Ankrd50 chr3:38483455-38483955			Promoter	No
chr3:38484340-38484840	TSS	Ankrd50	Ankrd50 chr3:38484340-38484840			Promoter	Yes
chr3:38484872-38485372	TSS	Ankrd50	Ankrd50 chr3:38484872-38485372			Promoter	Yes
chr10:89872466-89872966	TSS	Anks1b	Anks1b chr10:89872466-89872966			Promoter	No
chr10:89873253-89873753	TSS	Anks1b	Anks1b chr10:89873253-89873753			Promoter	Yes
chr10:89873835-89874335	TSS	Anks1b	Anks1b chr10:89873835-89874335			Promoter	Yes
chr7:51510527-51511027	TSS	Ano5	Ano5 chr7:51510527-51511027			PEs	No
chrX:163908276-163908776	TSS	Ap1s2	Ap1s2 chrX:163908276-163908776	0.344396	3.06387e-14	Promoter	Yes
chrX:163908821-163909321	TSS	Ap1s2	Ap1s2 chrX:163908821-163909321			Promoter	Yes
chrX:163909377-163909877	TSS	Ap1s2	Ap1s2 chrX:163909377-163909877			Promoter	Yes
chr11:83302471-83302971	TSS	Ap2b1	Ap2b1 chr11:83302471-83302971			Promoter	No
chr11:83303149-83303649	TSS	Ap2b1	Ap2b1 chr11:83303149-83303649			Promoter	No
chr8:22805477-22805977	TSS	Ap3m2	Ap3m2 chr8:22805477-22805977			Promoter	Yes
chr8:22806511-22807011	TSS	Ap3m2	Ap3m2 chr8:22806511-22807011			Promoter	No
chr18:46740674-46741174	TSS	Ap3s1	Ap3s1 chr18:46740674-46741174			Promoter	No
chr18:46741304-46741804	TSS	Ap3s1	Ap3s1 chr18:46741304-46741804			Promoter	Yes
chr18:46742216-46742716	TSS	Ap3s1	Ap3s1 chr18:46742216-46742716	0.286538	5.82205e-10	Promoter	Yes
chr14:49065517-49066017	TSS	Ap5m1	Ap5m1 chr14:49065517-49066017			Promoter	Yes
chr14:49066089-49066589	TSS	Ap5m1	Ap5m1 chr14:49066089-49066589			Promoter	Yes
chr14:49066650-49067150	TSS	Ap5m1	Ap5m1 chr14:49066650-49067150			Promoter	Yes
chr10:91082130-91082630	TSS	Apaf1	Apaf1 chr10:91082130-91082630			Promoter	Yes
chr10:91082742-91083242	TSS	Apaf1	Apaf1 chr10:91082742-91083242	-0.283762	8.84126e-10	Promoter	No
chr18:34220675-34221175	TSS	Apc	Apc chr18:34220675-34221175			Promoter	Yes
chr18:34221434-34221934	TSS	Apc	Apc chr18:34221434-34221934			Promoter	No
chr18:62922014-62922514	TSS	Apcdd1	Apcdd1 chr18:62922014-62922514			Promoter	No
chr18:62922808-62923308	TSS	Apcdd1	Apcdd1 chr18:62922808-62923308			Promoter	No
chr9:108093347-108093847	TSS	Apeh	Apeh chr9:108093347-108093847			Other	Yes
chr9:108094275-108094775	TSS	Apeh	Apeh chr9:108094275-108094775	0.568997	2.63768e-42	Promoter	Yes
chr9:108094956-108095456	TSS	Apeh	Apeh chr9:108094956-108095456			Promoter	Yes
chr3:95893591-95894091	TSS	Aph1a	Aph1a chr3:95893591-95894091			Promoter	Yes
chr3:95894258-95894758	TSS	Aph1a	Aph1a chr3:95894258-95894758			Promoter	Yes
chr3:95894791-95895291	TSS	Aph1a	Aph1a chr3:95894791-95895291			Promoter	No
chr9:66794526-66795026	TSS	Aph1b	Aph1b chr9:66794526-66795026			Promoter	Yes
chr9:66795260-66795760	TSS	Aph1b	Aph1b chr9:66795260-66795760			Promoter	Yes
chr9:66795782-66796282	TSS	Aph1b	Aph1b chr9:66795782-66796282			Promoter	No
chr2:103072953-103073453	TSS	Apip	Apip chr2:103072953-103073453	-0.286797	5.59915e-10	Promoter	Yes
chr2:103073516-103074016	TSS	Apip	Apip chr2:103073516-103074016	-0.606273	2.01839e-49	Promoter	Yes
chr12:111712361-111712861	TSS	Apopt1	Apopt1 chr12:111712361-111712861			Promoter	No
chr12:111712899-111713399	TSS	Apopt1	Apopt1 chr12:111712899-111713399			Promoter	No
chr12:111713459-111713959	TSS	Apopt1	Apopt1 chr12:111713459-111713959			Promoter	No
chr7:97737264-97737764	TSS	Aqp11	Aqp11 chr7:97737264-97737764			Promoter	No
chr7:97737831-97738331	TSS	Aqp11	Aqp11 chr7:97737831-97738331			Promoter	Yes
chr2:114174469-114174969	TSS	Aqr	Aqr chr2:114174469-114174969			Promoter	No
chr2:114175147-114175647	TSS	Aqr	Aqr chr2:114175147-114175647			Promoter	Yes
chr9:44766919-44767419	TSS	Arcn1	Arcn1 chr9:44766919-44767419			Promoter	No
chr9:44767612-44768112	TSS	Arcn1	Arcn1 chr9:44767612-44768112			Promoter	Yes
chr1:10231395-10231895	TSS	Arfgef1	Arfgef1 chr1:10231395-10231895			Promoter	Yes
chr1:10231992-10232492	TSS	Arfgef1	Arfgef1 chr1:10231992-10232492			Promoter	Yes
chr1:10232801-10233301	TSS	Arfgef1	Arfgef1 chr1:10232801-10233301	0.2705	6.08921e-09	Promoter	Yes
chr3:85886591-85887091	TSS	Arfip1	Arfip1 chr3:85886591-85887091			Promoter	No
chr3:85887135-85887635	TSS	Arfip1	Arfip1 chr3:85887135-85887635	-0.384551	8.31236e-18	Promoter	No
chr3:85888086-85888586	TSS	Arfip1	Arfip1 chr3:85888086-85888586			PEs	No
chr12:79130591-79131091	TSS	Arg2	Arg2 chr12:79130591-79131091	0.712794	3.74973e-76	Promoter	Yes
chr12:79131259-79131759	TSS	Arg2	Arg2 chr12:79131259-79131759			Promoter	No
chr8:8689097-8689597	TSS	Arglu1	Arglu1 chr8:8689097-8689597			Promoter	No
chr8:8689736-8690236	TSS	Arglu1	Arglu1 chr8:8689736-8690236	-0.279686	1.61898e-09	Promoter	Yes
chr8:8690278-8690778	TSS	Arglu1	Arglu1 chr8:8690278-8690778	-0.277703	2.16437e-09	Promoter	Yes
chr18:6135134-6135634	TSS	Arhgap12	Arhgap12 chr18:6135134-6135634			Promoter	No
chr18:6136075-6136575	TSS	Arhgap12	Arhgap12 chr18:6136075-6136575	-0.316661	4.5523e-12	Promoter	No
chr18:6136762-6137262	TSS	Arhgap12	Arhgap12 chr18:6136762-6137262			Promoter	No
chr10:26772226-26772726	TSS	Arhgap18	Arhgap18 chr10:26772226-26772726	0.544921	3.53035e-38	Promoter	Yes
chr10:26772911-26773411	TSS	Arhgap18	Arhgap18 chr10:26772911-26773411	0.620976	1.69782e-52	Promoter	Yes
chr4:140664789-140665289	TSS	Arhgef10l	Arhgef10l chr4:140664789-140665289			PEs	No
chr4:140665676-140666176	TSS	Arhgef10l	Arhgef10l chr4:140665676-140666176	0.288821	4.11348e-10	PEs	Yes
chr8:3392742-3393242	TSS	Arhgef18	Arhgef18 chr8:3392742-3393242			Promoter	Yes
chr3:62338715-62339215	TSS	Arhgef26	Arhgef26 chr3:62338715-62339215	0.284796	7.57393e-10	Promoter	Yes
chr3:62339353-62339853	TSS	Arhgef26	Arhgef26 chr3:62339353-62339853			Promoter	Yes
chr8:11726739-11727239	TSS	Arhgef7	Arhgef7 chr8:11726739-11727239			Other	No
chr8:11727505-11728005	TSS	Arhgef7	Arhgef7 chr8:11727505-11728005	0.302849	4.5235e-11	Promoter	No
chr8:11728127-11728627	TSS	Arhgef7	Arhgef7 chr8:11728127-11728627			Promoter	No
chr8:11728843-11729343	TSS	Arhgef7	Arhgef7 chr8:11728843-11729343			Promoter	No
chr16:62846786-62847286	TSS	Arl13b	Arl13b chr16:62846786-62847286	0.587753	9.07243e-46	Promoter	Yes
chr2:106973462-106973962	TSS	Arl14ep	Arl14ep chr2:106973462-106973962			Promoter	No
chr2:106974190-106974690	TSS	Arl14ep	Arl14ep chr2:106974190-106974690			Promoter	Yes
chr11:120466622-120467122	TSS	Arl16	Arl16 chr11:120466622-120467122			Promoter	Yes
chr11:120467260-120467760	TSS	Arl16	Arl16 chr11:120467260-120467760			Promoter	Yes
chr11:120467792-120468292	TSS	Arl16	Arl16 chr11:120467792-120468292			Promoter	No
chr19:6140410-6140910	TSS	Arl2	Arl2 chr19:6140410-6140910			Promoter	Yes
chr19:6140963-6141463	TSS	Arl2	Arl2 chr19:6140963-6141463			Promoter	Yes
chr19:46571796-46572296	TSS	Arl3	Arl3 chr19:46571796-46572296			Promoter	No
chr19:46572342-46572842	TSS	Arl3	Arl3 chr19:46572342-46572842			Promoter	Yes
chr19:46572883-46573383	TSS	Arl3	Arl3 chr19:46572883-46573383			Promoter	Yes
chr19:46573551-46574051	TSS	Arl3	Arl3 chr19:46573551-46574051			Promoter	Yes
chr1:88701190-88701690	TSS	Arl4c	Arl4c chr1:88701190-88701690	0.276119	2.72549e-09	Promoter	Yes
chr1:88701907-88702407	TSS	Arl4c	Arl4c chr1:88701907-88702407	0.337251	1.16975e-13	Promoter	No
chr1:88703144-88703644	TSS	Arl4c	Arl4c chr1:88703144-88703644			Other	No
chr6:97209963-97210463	TSS	Arl6ip5	Arl6ip5 chr6:97209963-97210463			Other	No
chr6:97210480-97210980	TSS	Arl6ip5	Arl6ip5 chr6:97210480-97210980	0.250523	9.11998e-08	Promoter	No
chr6:97211204-97211704	TSS	Arl6ip5	Arl6ip5 chr6:97211204-97211704			Promoter	No
chrX:134756248-134756748	TSS	Armcx3	Armcx3 chrX:134756248-134756748			Promoter	Yes
chrX:134756914-134757414	TSS	Armcx3	Armcx3 chrX:134756914-134757414			Promoter	Yes
chrX:134757498-134757998	TSS	Armcx3	Armcx3 chrX:134757498-134757998			Promoter	No
chrX:100605210-100605710	TSS	Arr3	Arr3 chrX:100605210-100605710	0.540074	2.18102e-37	PEs	Yes
chr15:64381642-64382142	TSS	Asap1	Asap1 chr15:64381642-64382142			Promoter	No
chr15:64382338-64382838	TSS	Asap1	Asap1 chr15:64382338-64382838			Promoter	No
chr15:64383201-64383701	TSS	Asap1	Asap1 chr15:64383201-64383701			Promoter	No
chr7:126949123-126949623	TSS	Asphd1	Asphd1 chr7:126949123-126949623			Promoter	Yes
chr7:126949682-126950182	TSS	Asphd1	Asphd1 chr7:126949682-126950182			Promoter	Yes
chr7:126950248-126950748	TSS	Asphd1	Asphd1 chr7:126950248-126950748	0.466743	7.10487e-27	Promoter	Yes
chr6:136518514-136519014	TSS	Atf7ip	Atf7ip chr6:136518514-136519014	0.271434	5.33551e-09	Promoter	Yes
chr6:136519206-136519706	TSS	Atf7ip	Atf7ip chr6:136519206-136519706			Promoter	Yes
chr6:124755027-124755527	TSS	Atn1	Atn1 chr6:124755027-124755527			Promoter	No
chr6:124755843-124756343	TSS	Atn1	Atn1 chr6:124755843-124756343			Promoter	No
chr6:124756549-124757049	TSS	Atn1	Atn1 chr6:124756549-124757049			Promoter	No
chr11:55459687-55460187	TSS	Atox1	Atox1 chr11:55459687-55460187			PEs	No
chr11:55460478-55460978	TSS	Atox1	Atox1 chr11:55460478-55460978			Promoter	No
chr11:55461048-55461548	TSS	Atox1	Atox1 chr11:55461048-55461548			Promoter	Yes
chr8:12756166-12756666	TSS	Atp11a	Atp11a chr8:12756166-12756666			Promoter	No
chr8:12756850-12757350	TSS	Atp11a	Atp11a chr8:12756850-12757350	0.294889	1.60782e-10	Promoter	No
chr8:12757627-12758127	TSS	Atp11a	Atp11a chr8:12757627-12758127			Promoter	No
chr10:98913913-98914413	TSS	Atp2b1	Atp2b1 chr10:98913913-98914413	0.551149	3.25868e-39	Promoter	Yes
chr10:98914811-98915311	TSS	Atp2b1	Atp2b1 chr10:98914811-98915311	0.47803	2.49214e-28	Promoter	No
chr10:98915342-98915842	TSS	Atp2b1	Atp2b1 chr10:98915342-98915842	0.359735	1.53091e-15	Promoter	Yes
chr2:174463379-174463879	TSS	Atp5e	Atp5e chr2:174463379-174463879			Promoter	No
chr2:174463901-174464401	TSS	Atp5e	Atp5e chr2:174463901-174464401			Promoter	Yes
chr15:102670225-102670725	TSS	Atp5g2	Atp5g2 chr15:102670225-102670725			Promoter	No
chr15:102670914-102671414	TSS	Atp5g2	Atp5g2 chr15:102670914-102671414			Promoter	Yes
chr15:102671681-102672181	TSS	Atp5g2	Atp5g2 chr15:102671681-102672181	-0.376142	5.13342e-17	Promoter	Yes
chr2:73910410-73910910	TSS	Atp5g3	Atp5g3 chr2:73910410-73910910	0.432179	9.49691e-23	Promoter	Yes
chr2:73911120-73911620	TSS	Atp5g3	Atp5g3 chr2:73911120-73911620	0.480587	1.14706e-28	Promoter	Yes
chr2:73911624-73912124	TSS	Atp5g3	Atp5g3 chr2:73911624-73912124			Promoter	No
chr9:44920186-44920686	TSS	Atp5l	Atp5l chr9:44920186-44920686			Promoter	Yes
chr9:44920735-44921235	TSS	Atp5l	Atp5l chr9:44920735-44921235			Promoter	Yes
chr17:24168779-24169279	TSS	Atp6v0c	Atp6v0c chr17:24168779-24169279			Promoter	Yes
chr17:24169457-24169957	TSS	Atp6v0c	Atp6v0c chr17:24169457-24169957			Promoter	Yes
chr4:63544053-63544553	TSS	Atp6v1g1	Atp6v1g1 chr4:63544053-63544553			Promoter	No
chr4:63544559-63545059	TSS	Atp6v1g1	Atp6v1g1 chr4:63544559-63545059	0.385895	6.18687e-18	Promoter	Yes
chr4:63545558-63546058	TSS	Atp6v1g1	Atp6v1g1 chr4:63545558-63546058			Promoter	No
chr18:64659849-64660349	TSS	Atp8b1	Atp8b1 chr18:64659849-64660349			PEs	No
chr18:64660822-64661322	TSS	Atp8b1	Atp8b1 chr18:64660822-64661322			PEs	No
chr18:80933321-80933821	TSS	Atp9b	Atp9b chr18:80933321-80933821			Promoter	No
chr18:80933836-80934336	TSS	Atp9b	Atp9b chr18:80933836-80934336			Promoter	No
chrX:105928490-105928990	TSS	Atrx	Atrx chrX:105928490-105928990	-0.268498	8.07578e-09	Promoter	Yes
chrX:105929188-105929688	TSS	Atrx	Atrx chrX:105929188-105929688			Promoter	Yes
chr7:126502258-126502758	TSS	Atxn2l	Atxn2l chr7:126502258-126502758	-0.325165	1.03844e-12	Promoter	Yes
chr7:126503335-126503835	TSS	Atxn2l	Atxn2l chr7:126503335-126503835			Promoter	Yes
chr12:101957479-101957979	TSS	Atxn3	Atxn3 chr12:101957479-101957979			Promoter	Yes
chr12:101957982-101958482	TSS	Atxn3	Atxn3 chr12:101957982-101958482			Promoter	Yes
chr12:101958520-101959020	TSS	Atxn3	Atxn3 chr12:101958520-101959020			Promoter	No
chr4:155830583-155831083	TSS	Aurkaip1	Aurkaip1 chr4:155830583-155831083			Promoter	No
chr4:155831344-155831844	TSS	Aurkaip1	Aurkaip1 chr4:155831344-155831844			Promoter	No
chr4:155832195-155832695	TSS	Aurkaip1	Aurkaip1 chr4:155832195-155832695			Promoter	Yes
chr1:143640513-143641013	TSS	B3galt2	B3galt2 chr1:143640513-143641013			Promoter	Yes
chr19:8920110-8920610	TSS	B3gat3	B3gat3 chr19:8920110-8920610			Promoter	Yes
chr19:8920708-8921208	TSS	B3gat3	B3gat3 chr19:8920708-8921208			Promoter	Yes
chr7:141059979-141060479	TSS	B4galnt4	B4galnt4 chr7:141059979-141060479			Promoter	No
chr7:141060695-141061195	TSS	B4galnt4	B4galnt4 chr7:141060695-141061195			Promoter	No
chr7:141061449-141061949	TSS	B4galnt4	B4galnt4 chr7:141061449-141061949			Promoter	No
chr4:117882739-117883239	TSS	B4galt2	B4galt2 chr4:117882739-117883239			Promoter	Yes
chr4:117883260-117883760	TSS	B4galt2	B4galt2 chr4:117883260-117883760			Promoter	No
chr16:97355655-97356155	TSS	Bace2	Bace2 chr16:97355655-97356155			PEs	No
chr16:97356443-97356943	TSS	Bace2	Bace2 chr16:97356443-97356943			PEs	Yes
chr16:97357444-97357944	TSS	Bace2	Bace2 chr16:97357444-97357944			PEs	Yes
chr16:87697853-87698353	TSS	Bach1	Bach1 chr16:87697853-87698353			PEs	No
chr16:87698723-87699223	TSS	Bach1	Bach1 chr16:87698723-87699223			Promoter	No
chr16:87699231-87699731	TSS	Bach1	Bach1 chr16:87699231-87699731			Promoter	No
chr16:87699946-87700446	TSS	Bach1	Bach1 chr16:87699946-87700446			Promoter	Yes
chr19:6940981-6941481	TSS	Bad	Bad chr19:6940981-6941481			Promoter	Yes
chr19:6941603-6942103	TSS	Bad	Bad chr19:6941603-6942103			Promoter	Yes
chr19:6942268-6942768	TSS	Bad	Bad chr19:6942268-6942768			Promoter	Yes
chr4:40947535-40948035	TSS	Bag1	Bag1 chr4:40947535-40948035			Promoter	Yes
chr4:40948174-40948674	TSS	Bag1	Bag1 chr4:40948174-40948674	-0.466116	8.52725e-27	Promoter	No
chr7:128523263-128523763	TSS	Bag3	Bag3 chr7:128523263-128523763			Promoter	Yes
chr7:128524133-128524633	TSS	Bag3	Bag3 chr7:128524133-128524633			Promoter	Yes
chr10:128090884-128091384	TSS	Baz2a	Baz2a chr10:128090884-128091384			Promoter	Yes
chr10:128091540-128092040	TSS	Baz2a	Baz2a chr10:128091540-128092040			Promoter	Yes
chr10:128092449-128092949	TSS	Baz2a	Baz2a chr10:128092449-128092949			Promoter	No
chr3:37312266-37312766	TSS	Bbs12	Bbs12 chr3:37312266-37312766	0.282966	9.95667e-10	Promoter	Yes
chr3:37312997-37313497	TSS	Bbs12	Bbs12 chr3:37312997-37313497			Promoter	No
chr3:37313515-37314015	TSS	Bbs12	Bbs12 chr3:37313515-37314015			Promoter	No
chr12:31633889-31634389	TSS	Bcap29	Bcap29 chr12:31633889-31634389			Promoter	No
chr12:31634495-31634995	TSS	Bcap29	Bcap29 chr12:31634495-31634995	-0.250624	9.00149e-08	Promoter	Yes
chr12:31635148-31635648	TSS	Bcap29	Bcap29 chr12:31635148-31635648			PEs	No
chrX:73716861-73717361	TSS	Bcap31	Bcap31 chrX:73716861-73717361			Promoter	Yes
chrX:73717388-73717888	TSS	Bcap31	Bcap31 chrX:73717388-73717888			PEs	No
chrX:73718206-73718706	TSS	Bcap31	Bcap31 chrX:73718206-73718706			PEs	No
chr7:127707997-127708497	TSS	Bcl7c	Bcl7c chr7:127707997-127708497			Promoter	No
chr7:127708663-127709163	TSS	Bcl7c	Bcl7c chr7:127708663-127709163			Promoter	No
chr13:100103197-100103697	TSS	Bdp1	Bdp1 chr13:100103197-100103697			Promoter	Yes
chr13:100103843-100104343	TSS	Bdp1	Bdp1 chr13:100103843-100104343			Promoter	Yes
chr4:111414685-111415185	TSS	Bend5	Bend5 chr4:111414685-111415185	0.335408	1.64219e-13	Promoter	Yes
chr4:111415398-111415898	TSS	Bend5	Bend5 chr4:111415398-111415898			Promoter	Yes
chrX:136216256-136216756	TSS	Bex1	Bex1 chrX:136216256-136216756			Other	No
chrX:136067121-136067621	TSS	Bex2	Bex2 chrX:136067121-136067621			Promoter	No
chrX:136068129-136068629	TSS	Bex2	Bex2 chrX:136068129-136068629			Other	No
chr13:49340446-49340946	TSS	Bicd2	Bicd2 chr13:49340446-49340946			Promoter	No
chr13:49341216-49341716	TSS	Bicd2	Bicd2 chr13:49341216-49341716			Promoter	Yes
chr13:49342172-49342672	TSS	Bicd2	Bicd2 chr13:49342172-49342672			Promoter	Yes
chr2:157565453-157565953	TSS	Blcap	Blcap chr2:157565453-157565953			Promoter	Yes
chr10:128922197-128922697	TSS	Bloc1s1	Bloc1s1 chr10:128922197-128922697			PEs	No
chr10:128922879-128923379	TSS	Bloc1s1	Bloc1s1 chr10:128922879-128923379			Promoter	Yes
chr10:128923508-128924008	TSS	Bloc1s1	Bloc1s1 chr10:128923508-128924008			Promoter	Yes
chr1:59763070-59763570	TSS	Bmpr2	Bmpr2 chr1:59763070-59763570			Promoter	Yes
chr1:59763676-59764176	TSS	Bmpr2	Bmpr2 chr1:59763676-59764176			Promoter	No
chr1:59764510-59765010	TSS	Bmpr2	Bmpr2 chr1:59764510-59765010			Promoter	Yes
chr17:26780817-26781317	TSS	Bnip1	Bnip1 chr17:26780817-26781317			Promoter	No
chr17:26781446-26781946	TSS	Bnip1	Bnip1 chr17:26781446-26781946			Promoter	No
chrX:75416369-75416869	TSS	Brcc3	Brcc3 chrX:75416369-75416869			Promoter	Yes
chrX:75416915-75417415	TSS	Brcc3	Brcc3 chrX:75416915-75417415			Promoter	Yes
chr15:88733269-88733769	TSS	Brd1	Brd1 chr15:88733269-88733769			Promoter	No
chr15:88734033-88734533	TSS	Brd1	Brd1 chr15:88734033-88734533	-0.289885	3.49439e-10	Promoter	No
chr7:141948738-141949238	TSS	Brsk2	Brsk2 chr7:141948738-141949238			Promoter	No
chr7:141949371-141949871	TSS	Brsk2	Brsk2 chr7:141949371-141949871			Promoter	Yes
chr7:141950014-141950514	TSS	Brsk2	Brsk2 chr7:141950014-141950514			Promoter	Yes
chr7:141950585-141951085	TSS	Brsk2	Brsk2 chr7:141950585-141951085			Promoter	No
chr2:138256298-138256798	TSS	Btbd3	Btbd3 chr2:138256298-138256798			Promoter	Yes
chr2:138256802-138257302	TSS	Btbd3	Btbd3 chr2:138256802-138257302			Promoter	Yes
chr13:98316162-98316662	TSS	Btf3	Btf3 chr13:98316162-98316662			Promoter	Yes
chr13:98316763-98317263	TSS	Btf3	Btf3 chr13:98316763-98317263	-0.312319	9.49522e-12	Promoter	Yes
chr13:98317268-98317768	TSS	Btf3	Btf3 chr13:98317268-98317768			Promoter	No
chr10:96615994-96616494	TSS	Btg1	Btg1 chr10:96615994-96616494	0.290946	2.96801e-10	Promoter	No
chr10:96616687-96617187	TSS	Btg1	Btg1 chr10:96616687-96617187	0.278819	1.83849e-09	Promoter	Yes
chr10:96617467-96617967	TSS	Btg1	Btg1 chr10:96617467-96617967			Promoter	No
chr4:100775929-100776429	TSS	Cachd1	Cachd1 chr4:100775929-100776429			Promoter	No
chr4:100776435-100776935	TSS	Cachd1	Cachd1 chr4:100776435-100776935	0.336034	1.46382e-13	Promoter	Yes
chr4:100777251-100777751	TSS	Cachd1	Cachd1 chr4:100777251-100777751	0.418145	3.3066e-21	Promoter	Yes
chr6:119196347-119196847	TSS	Cacna1c	Cacna1c chr6:119196347-119196847			Other	Yes
chr5:15933552-15934052	TSS	Cacna2d1	Cacna2d1 chr5:15933552-15934052			Promoter	Yes
chr5:15934180-15934680	TSS	Cacna2d1	Cacna2d1 chr5:15934180-15934680			Promoter	Yes
chr5:15934799-15935299	TSS	Cacna2d1	Cacna2d1 chr5:15934799-15935299	0.275475	2.99154e-09	Promoter	Yes
chr5:15935318-15935818	TSS	Cacna2d1	Cacna2d1 chr5:15935318-15935818			Promoter	Yes
chr1:173366857-173367357	TSS	Cadm3	Cadm3 chr1:173366857-173367357			Promoter	Yes
chr1:173367690-173368190	TSS	Cadm3	Cadm3 chr1:173367690-173368190			Promoter	Yes
chr14:12821791-12822291	TSS	Cadps	Cadps chr14:12821791-12822291	0.309251	1.58478e-11	Promoter	Yes
chr14:12822854-12823354	TSS	Cadps	Cadps chr14:12822854-12823354			Promoter	Yes
chr14:12823747-12824247	TSS	Cadps	Cadps chr14:12823747-12824247			PEs	Yes
chr8:110167992-110168492	TSS	Calb2	Calb2 chr8:110167992-110168492			Other	Yes
chr4:138454132-138454632	TSS	Camk2n1	Camk2n1 chr4:138454132-138454632			Promoter	Yes
chr4:138455105-138455605	TSS	Camk2n1	Camk2n1 chr4:138455105-138455605			Promoter	No
chr4:138455933-138456433	TSS	Camk2n1	Camk2n1 chr4:138455933-138456433			Promoter	Yes
chr18:32938249-32938749	TSS	Camk4	Camk4 chr18:32938249-32938749			PEs	Yes
chr18:32939239-32939739	TSS	Camk4	Camk4 chr18:32939239-32939739			Promoter	Yes
chr18:32939807-32940307	TSS	Camk4	Camk4 chr18:32939807-32940307			Promoter	No
chr5:122778544-122779044	TSS	Camkk2	Camkk2 chr5:122778544-122779044			Promoter	No
chr5:122779114-122779614	TSS	Camkk2	Camkk2 chr5:122779114-122779614			Promoter	No
chr5:122780170-122780670	TSS	Camkk2	Camkk2 chr5:122780170-122780670			Other	No
chr1:136344886-136345386	TSS	Camsap2	Camsap2 chr1:136344886-136345386			Promoter	No
chr1:136345400-136345900	TSS	Camsap2	Camsap2 chr1:136345400-136345900			Promoter	Yes
chr1:136345938-136346438	TSS	Camsap2	Camsap2 chr1:136345938-136346438			Promoter	Yes
chr1:136346587-136347087	TSS	Camsap2	Camsap2 chr1:136346587-136347087			PEs	Yes
chr8:3587464-3587964	TSS	Camsap3	Camsap3 chr8:3587464-3587964			Promoter	No
chr8:3588143-3588643	TSS	Camsap3	Camsap3 chr8:3588143-3588643			Promoter	Yes
chr13:49215134-49215634	TSS	Card19	Card19 chr13:49215134-49215634	0.375738	5.5946e-17	Promoter	No
chr13:49215845-49216345	TSS	Card19	Card19 chr13:49215845-49216345	0.552801	1.71603e-39	Promoter	Yes
chr13:49216838-49217338	TSS	Card19	Card19 chr13:49216838-49217338			PEs	No
chr13:99899974-99900474	TSS	Cartpt	Cartpt chr13:99899974-99900474			PEs	No
chr13:99900611-99901111	TSS	Cartpt	Cartpt chr13:99900611-99901111			PEs	Yes
chrX:13845323-13845823	TSS	Cask	Cask chrX:13845323-13845823			Promoter	Yes
chrX:13845872-13846372	TSS	Cask	Cask chrX:13845872-13846372			Promoter	Yes
chrX:13846506-13847006	TSS	Cask	Cask chrX:13846506-13847006			Promoter	No
chrX:13847392-13847892	TSS	Cask	Cask chrX:13847392-13847892			Promoter	No
chr8:46616485-46616985	TSS	Casp3	Casp3 chr8:46616485-46616985			Promoter	No
chr8:46617093-46617593	TSS	Casp3	Casp3 chr8:46617093-46617593			Promoter	Yes
chr8:46617599-46618099	TSS	Casp3	Casp3 chr8:46617599-46618099			Promoter	Yes
chr13:74807707-74808207	TSS	Cast	Cast chr13:74807707-74808207			Promoter	Yes
chr13:74808447-74808947	TSS	Cast	Cast chr13:74808447-74808947			Promoter	Yes
chr6:17305999-17306499	TSS	Cav1	Cav1 chr6:17305999-17306499	0.395027	7.9832e-19	PEs	Yes
chr6:17306526-17307026	TSS	Cav1	Cav1 chr6:17306526-17307026			PEs	Yes
chr6:51469752-51470252	TSS	Cbx3	Cbx3 chr6:51469752-51470252			Promoter	Yes
chr6:51470720-51471220	TSS	Cbx3	Cbx3 chr6:51470720-51471220			Promoter	Yes
chr4:108618696-108619196	TSS	Cc2d1b	Cc2d1b chr4:108618696-108619196			PEs	No
chr4:108619536-108620036	TSS	Cc2d1b	Cc2d1b chr4:108619536-108620036			Promoter	Yes
chr4:108620436-108620936	TSS	Cc2d1b	Cc2d1b chr4:108620436-108620936			Promoter	No
chr18:46311153-46311653	TSS	Ccdc112	Ccdc112 chr18:46311153-46311653			Promoter	Yes
chr18:46311709-46312209	TSS	Ccdc112	Ccdc112 chr18:46311709-46312209			Promoter	Yes
chr17:29716831-29717331	TSS	Ccdc167	Ccdc167 chr17:29716831-29717331			Promoter	Yes
chr4:116596807-116597307	TSS	Ccdc17	Ccdc17 chr4:116596807-116597307			Promoter	Yes
chr4:116597420-116597920	TSS	Ccdc17	Ccdc17 chr4:116597420-116597920			Promoter	Yes
chr1:164275348-164275848	TSS	Ccdc181	Ccdc181 chr1:164275348-164275848			Promoter	Yes
chr1:164276588-164277088	TSS	Ccdc181	Ccdc181 chr1:164276588-164277088			PEs	No
chr2:25616659-25617159	TSS	Ccdc183	Ccdc183 chr2:25616659-25617159			Other	No
chr2:25618338-25618838	TSS	Ccdc183	Ccdc183 chr2:25618338-25618838			Other	No
chr14:65837092-65837592	TSS	Ccdc25	Ccdc25 chr14:65837092-65837592			Promoter	Yes
chr14:65837609-65838109	TSS	Ccdc25	Ccdc25 chr14:65837609-65838109			Promoter	Yes
chr16:27387684-27388184	TSS	Ccdc50	Ccdc50 chr16:27387684-27388184			PEs	No
chr16:27388647-27389147	TSS	Ccdc50	Ccdc50 chr16:27388647-27389147			Promoter	Yes
chr16:27389444-27389944	TSS	Ccdc50	Ccdc50 chr16:27389444-27389944			Promoter	Yes
chr7:18909744-18910244	TSS	Ccdc61	Ccdc61 chr7:18909744-18910244			Promoter	No
chr7:18910302-18910802	TSS	Ccdc61	Ccdc61 chr7:18910302-18910802			Promoter	Yes
chr7:18910803-18911303	TSS	Ccdc61	Ccdc61 chr7:18910803-18911303			Promoter	No
chr5:123930361-123930861	TSS	Ccdc62	Ccdc62 chr5:123930361-123930861			Promoter	Yes
chr14:27508254-27508754	TSS	Ccdc66	Ccdc66 chr14:27508254-27508754			Promoter	Yes
chr14:27508852-27509352	TSS	Ccdc66	Ccdc66 chr14:27508852-27509352			Promoter	No
chr9:13246834-13247334	TSS	Ccdc82	Ccdc82 chr9:13246834-13247334			Promoter	No
chr19:5456190-5456690	TSS	Ccdc85b	Ccdc85b chr19:5456190-5456690			Promoter	No
chr19:5456787-5457287	TSS	Ccdc85b	Ccdc85b chr19:5456787-5457287	-0.299884	7.28757e-11	Promoter	Yes
chr19:5457366-5457866	TSS	Ccdc85b	Ccdc85b chr19:5457366-5457866			Promoter	Yes
chr12:108274078-108274578	TSS	Ccdc85c	Ccdc85c chr12:108274078-108274578			Promoter	Yes
chr12:108274726-108275226	TSS	Ccdc85c	Ccdc85c chr12:108274726-108275226			Promoter	Yes
chr12:108275322-108275822	TSS	Ccdc85c	Ccdc85c chr12:108275322-108275822			Promoter	Yes
chr12:108276203-108276703	TSS	Ccdc85c	Ccdc85c chr12:108276203-108276703			Promoter	Yes
chr11:29373373-29373873	TSS	Ccdc88a	Ccdc88a chr11:29373373-29373873			Promoter	Yes
chr11:29374275-29374775	TSS	Ccdc88a	Ccdc88a chr11:29374275-29374775			Promoter	No
chr6:147475607-147476107	TSS	Ccdc91	Ccdc91 chr6:147475607-147476107			Promoter	Yes
chr6:147476330-147476830	TSS	Ccdc91	Ccdc91 chr6:147476330-147476830			Promoter	No
chr1:121430880-121431380	TSS	Ccdc93	Ccdc93 chr1:121430880-121431380			Promoter	No
chr1:121431485-121431985	TSS	Ccdc93	Ccdc93 chr1:121431485-121431985			Promoter	Yes
chr4:21726778-21727278	TSS	Ccnc	Ccnc chr4:21726778-21727278			Promoter	No
chr4:21727475-21727975	TSS	Ccnc	Ccnc chr4:21727475-21727975			Promoter	Yes
chr4:21728191-21728691	TSS	Ccnc	Ccnc chr4:21728191-21728691			Promoter	Yes
chr11:40754435-40754935	TSS	Ccng1	Ccng1 chr11:40754435-40754935			Promoter	No
chr11:40755043-40755543	TSS	Ccng1	Ccng1 chr11:40755043-40755543			Promoter	Yes
chr5:93205186-93205686	TSS	Ccni	Ccni chr5:93205186-93205686			Promoter	Yes
chr5:93205756-93206256	TSS	Ccni	Ccni chr5:93205756-93206256			Promoter	Yes
chr5:93206624-93207124	TSS	Ccni	Ccni chr5:93206624-93207124			Promoter	Yes
chr5:93207313-93207813	TSS	Ccni	Ccni chr5:93207313-93207813			PEs	No
chr19:40830465-40830965	TSS	Ccnj	Ccnj chr19:40830465-40830965	-0.277208	2.32631e-09	Promoter	Yes
chr19:40830966-40831466	TSS	Ccnj	Ccnj chr19:40830966-40831466			Promoter	Yes
chr19:40831590-40832090	TSS	Ccnj	Ccnj chr19:40831590-40832090			Promoter	Yes
chr14:36967649-36968149	TSS	Ccser2	Ccser2 chr14:36967649-36968149			Promoter	No
chr14:36968454-36968954	TSS	Ccser2	Ccser2 chr14:36968454-36968954			Promoter	Yes
chr14:36969160-36969660	TSS	Ccser2	Ccser2 chr14:36969160-36969660			Other	No
chr16:45407737-45408237	TSS	Cd200	Cd200 chr16:45407737-45408237			Promoter	No
chr16:45408717-45409217	TSS	Cd200	Cd200 chr16:45408717-45409217			Promoter	No
chr10:128908964-128909464	TSS	Cd63	Cd63 chr10:128908964-128909464			Promoter	Yes
chr10:128909475-128909975	TSS	Cd63	Cd63 chr10:128909475-128909975			Promoter	Yes
chr1:179959739-179960239	TSS	Cdc42bpa	Cdc42bpa chr1:179959739-179960239			Promoter	Yes
chr1:179960240-179960740	TSS	Cdc42bpa	Cdc42bpa chr1:179960240-179960740			Promoter	Yes
chr1:179961301-179961801	TSS	Cdc42bpa	Cdc42bpa chr1:179961301-179961801			Promoter	No
chr12:111376886-111377386	TSS	Cdc42bpb	Cdc42bpb chr12:111376886-111377386			Promoter	Yes
chr12:111377403-111377903	TSS	Cdc42bpb	Cdc42bpb chr12:111377403-111377903			Promoter	Yes
chr12:111378154-111378654	TSS	Cdc42bpb	Cdc42bpb chr12:111378154-111378654			Promoter	No
chr11:80476583-80477083	TSS	Cdk5r1	Cdk5r1 chr11:80476583-80477083			Promoter	No
chr11:80477182-80477682	TSS	Cdk5r1	Cdk5r1 chr11:80477182-80477682			Promoter	Yes
chr11:80477752-80478252	TSS	Cdk5r1	Cdk5r1 chr11:80477752-80478252			Promoter	Yes
chr5:92042445-92042945	TSS	Cdkl2	Cdkl2 chr5:92042445-92042945			Promoter	Yes
chr5:92043020-92043520	TSS	Cdkl2	Cdkl2 chr5:92043020-92043520			Promoter	No
chr10:81481427-81481927	TSS	Celf5	Celf5 chr10:81481427-81481927			Promoter	No
chr10:81482446-81482946	TSS	Celf5	Celf5 chr10:81482446-81482946			Promoter	Yes
chr11:62538108-62538608	TSS	Cenpv	Cenpv chr11:62538108-62538608			Promoter	Yes
chr11:62538664-62539164	TSS	Cenpv	Cenpv chr11:62538664-62539164			Promoter	No
chr11:62539277-62539777	TSS	Cenpv	Cenpv chr11:62539277-62539777			Promoter	No
chr1:176806645-176807145	TSS	Cep170	Cep170 chr1:176806645-176807145			PEs	No
chr1:155972442-155972942	TSS	Cep350	Cep350 chr1:155972442-155972942			Promoter	Yes
chr1:155973140-155973640	TSS	Cep350	Cep350 chr1:155973140-155973640			Promoter	Yes
chr1:155973672-155974172	TSS	Cep350	Cep350 chr1:155973672-155974172			Promoter	Yes
chr10:41809252-41809752	TSS	Cep57l1	Cep57l1 chr10:41809252-41809752			Promoter	Yes
chr10:41809757-41810257	TSS	Cep57l1	Cep57l1 chr10:41809757-41810257			Promoter	Yes
chr10:41810258-41810758	TSS	Cep57l1	Cep57l1 chr10:41810258-41810758			Promoter	Yes
chr10:53379111-53379611	TSS	Cep85l	Cep85l chr10:53379111-53379611			Promoter	No
chr10:53379745-53380245	TSS	Cep85l	Cep85l chr10:53379745-53380245			Promoter	No
chr7:35395645-35396145	TSS	Cep89	Cep89 chr7:35395645-35396145			Promoter	No
chr7:35396154-35396654	TSS	Cep89	Cep89 chr7:35396154-35396654			Promoter	No
chr7:35396718-35397218	TSS	Cep89	Cep89 chr7:35396718-35397218	-0.329252	5.01875e-13	Promoter	Yes
chr7:35397463-35397963	TSS	Cep89	Cep89 chr7:35397463-35397963			Promoter	No
chr19:47937290-47937790	TSS	Cfap58	Cfap58 chr19:47937290-47937790			PEs	Yes
chr19:47937930-47938430	TSS	Cfap58	Cfap58 chr19:47937930-47938430			PEs	Yes
chr19:47938460-47938960	TSS	Cfap58	Cfap58 chr19:47938460-47938960			PEs	No
chr8:46162712-46163212	TSS	Cfap97	Cfap97 chr8:46162712-46163212			Promoter	No
chr8:46163319-46163819	TSS	Cfap97	Cfap97 chr8:46163319-46163819			Promoter	Yes
chr16:64850711-64851211	TSS	Cggbp1	Cggbp1 chr16:64850711-64851211			Promoter	Yes
chr16:64851597-64852097	TSS	Cggbp1	Cggbp1 chr16:64851597-64852097			Promoter	Yes
chr16:64852387-64852887	TSS	Cggbp1	Cggbp1 chr16:64852387-64852887			Promoter	Yes
chr2:129129458-129129958	TSS	Chchd5	Chchd5 chr2:129129458-129129958			Promoter	Yes
chr2:129130014-129130514	TSS	Chchd5	Chchd5 chr2:129130014-129130514			Promoter	Yes
chr2:129130544-129131044	TSS	Chchd5	Chchd5 chr2:129130544-129131044	0.323309	1.44032e-12	Promoter	No
chr8:90828035-90828535	TSS	Chd9	Chd9 chr8:90828035-90828535			Promoter	No
chr8:90828561-90829061	TSS	Chd9	Chd9 chr8:90828561-90829061			Promoter	No
chr8:90829332-90829832	TSS	Chd9	Chd9 chr8:90829332-90829832			PEs	No
chrX:103356106-103356606	TSS	Chic1	Chic1 chrX:103356106-103356606			Promoter	Yes
chrX:103356624-103357124	TSS	Chic1	Chic1 chrX:103356624-103357124			Promoter	Yes
chr7:141538536-141539036	TSS	Chid1	Chid1 chr7:141538536-141539036			PEs	No
chr7:141539116-141539616	TSS	Chid1	Chid1 chr7:141539116-141539616			Promoter	No
chr7:141539672-141540172	TSS	Chid1	Chid1 chr7:141539672-141540172			Promoter	No
chr7:141540498-141540998	TSS	Chid1	Chid1 chr7:141540498-141540998			Other	No
chrX:113184433-113184933	TSS	Chm	Chm chrX:113184433-113184933			Promoter	Yes
chrX:113185005-113185505	TSS	Chm	Chm chrX:113185005-113185505			Promoter	Yes
chrX:113185651-113186151	TSS	Chm	Chm chrX:113185651-113186151			PEs	No
chr6:71543382-71543882	TSS	Chmp3	Chmp3 chr6:71543382-71543882			Promoter	No
chr6:71544072-71544572	TSS	Chmp3	Chmp3 chr6:71544072-71544572			Promoter	No
chr12:76765238-76765738	TSS	Churc1	Churc1 chr12:76765238-76765738			Promoter	Yes
chr12:76765792-76766292	TSS	Churc1	Churc1 chr12:76765792-76766292			Promoter	No
chr12:86946037-86946537	TSS	Cipc	Cipc chr12:86946037-86946537			Promoter	Yes
chr12:86947026-86947526	TSS	Cipc	Cipc chr12:86947026-86947526			Promoter	Yes
chr12:86947563-86948063	TSS	Cipc	Cipc chr12:86947563-86948063			Promoter	Yes
chr2:73312355-73312855	TSS	Cir1	Cir1 chr2:73312355-73312855	0.323364	1.42647e-12	Promoter	Yes
chr2:73313031-73313531	TSS	Cir1	Cir1 chr2:73313031-73313531			Promoter	No
chr10:71344141-71344641	TSS	Cisd1	Cisd1 chr10:71344141-71344641			Promoter	Yes
chr10:71344734-71345234	TSS	Cisd1	Cisd1 chr10:71344734-71345234	0.256144	4.36344e-08	Promoter	Yes
chrX:102251255-102251755	TSS	Cited1	Cited1 chrX:102251255-102251755			Promoter	No
chrX:102251848-102252348	TSS	Cited1	Cited1 chrX:102251848-102252348	0.492351	2.95678e-30	Promoter	Yes
chrX:102252395-102252895	TSS	Cited1	Cited1 chrX:102252395-102252895			Promoter	Yes
chr9:113741164-113741664	TSS	Clasp2	Clasp2 chr9:113741164-113741664			Promoter	No
chr9:113741837-113742337	TSS	Clasp2	Clasp2 chr9:113741837-113742337			Promoter	No
chr9:113742446-113742946	TSS	Clasp2	Clasp2 chr9:113742446-113742946			Promoter	No
chr6:38661600-38662100	TSS	Clec2l	Clec2l chr6:38661600-38662100			Other	No
chr6:38662472-38662972	TSS	Clec2l	Clec2l chr6:38662472-38662972			Other	No
chr6:38663170-38663670	TSS	Clec2l	Clec2l chr6:38663170-38663670			Promoter	No
chr4:149586145-149586645	TSS	Clstn1	Clstn1 chr4:149586145-149586645	0.388593	3.4007e-18	Promoter	Yes
chr4:149586743-149587243	TSS	Clstn1	Clstn1 chr4:149586743-149587243	0.364643	5.66185e-16	Promoter	No
chr4:149587424-149587924	TSS	Clstn1	Clstn1 chr4:149587424-149587924	0.307535	2.10499e-11	Promoter	Yes
chr6:124463834-124464334	TSS	Clstn3	Clstn3 chr6:124463834-124464334			Promoter	Yes
chr6:124464511-124465011	TSS	Clstn3	Clstn3 chr6:124464511-124465011			Promoter	Yes
chr6:124465644-124466144	TSS	Clstn3	Clstn3 chr6:124465644-124466144			PEs	Yes
chr14:65967807-65968307	TSS	Clu	Clu chr14:65967807-65968307			PEs	No
chr14:65968321-65968821	TSS	Clu	Clu chr14:65968321-65968821	0.511541	5.49297e-33	PEs	Yes
chr16:57606589-57607089	TSS	Cmss1	Cmss1 chr16:57606589-57607089			Promoter	Yes
chr16:57607290-57607790	TSS	Cmss1	Cmss1 chr16:57607290-57607790			PEs	No
chr8:95805969-95806469	TSS	Cnot1	Cnot1 chr8:95805969-95806469			Promoter	No
chr8:95806542-95807042	TSS	Cnot1	Cnot1 chr8:95806542-95807042			Promoter	Yes
chr8:95807394-95807894	TSS	Cnot1	Cnot1 chr8:95807394-95807894	0.313471	7.82278e-12	Promoter	Yes
chr8:95807960-95808460	TSS	Cnot1	Cnot1 chr8:95807960-95808460	0.325899	9.12198e-13	Promoter	Yes
chr1:179545424-179545924	TSS	Cnst	Cnst chr1:179545424-179545924			Promoter	No
chr1:179546039-179546539	TSS	Cnst	Cnst chr1:179546039-179546539			Promoter	Yes
chr1:179546668-179547168	TSS	Cnst	Cnst chr1:179546668-179547168			Promoter	Yes
chr1:179547195-179547695	TSS	Cnst	Cnst chr1:179547195-179547695			Promoter	Yes
chr7:100536730-100537230	TSS	Coa4	Coa4 chr7:100536730-100537230	-0.486523	1.84506e-29	Promoter	No
chr1:37428800-37429300	TSS	Coa5	Coa5 chr1:37428800-37429300			PEs	No
chr1:37429372-37429872	TSS	Coa5	Coa5 chr1:37429372-37429872			Promoter	No
chr1:37429897-37430397	TSS	Coa5	Coa5 chr1:37429897-37430397	0.304653	3.37531e-11	Promoter	Yes
chr1:37430399-37430899	TSS	Coa5	Coa5 chr1:37430399-37430899			Promoter	Yes
chr8:126422153-126422653	TSS	Coa6	Coa6 chr8:126422153-126422653			Promoter	No
chr8:126422790-126423290	TSS	Coa6	Coa6 chr8:126422790-126423290	-0.265535	1.22041e-08	Promoter	No
chr11:88973640-88974140	TSS	Coil	Coil chr11:88973640-88974140			Promoter	Yes
chr11:88974252-88974752	TSS	Coil	Coil chr11:88974252-88974752			Promoter	Yes
chr8:11311453-11311953	TSS	Col4a2	Col4a2 chr8:11311453-11311953			PEs	No
chr8:11312324-11312824	TSS	Col4a2	Col4a2 chr8:11312324-11312824	0.311443	1.09965e-11	Promoter	No
chr8:11312969-11313469	TSS	Col4a2	Col4a2 chr8:11312969-11313469			Promoter	Yes
chr8:11313635-11314135	TSS	Col4a2	Col4a2 chr8:11313635-11314135			Promoter	Yes
chr9:20814432-20814932	TSS	Col5a3	Col5a3 chr9:20814432-20814932			PEs	No
chr9:20814944-20815444	TSS	Col5a3	Col5a3 chr9:20814944-20815444			PEs	Yes
chr12:28623082-28623582	TSS	Colec11	Colec11 chr12:28623082-28623582			Other	No
chr2:18672021-18672521	TSS	Commd3	Commd3 chr2:18672021-18672521	-0.276222	2.68506e-09	Promoter	Yes
chr2:18672535-18673035	TSS	Commd3	Commd3 chr2:18672535-18673035			Promoter	Yes
chr9:57157413-57157913	TSS	Commd4	Commd4 chr9:57157413-57157913			Promoter	No
chr9:57158105-57158605	TSS	Commd4	Commd4 chr9:57158105-57158605			Promoter	No
chr9:57158797-57159297	TSS	Commd4	Commd4 chr9:57158797-57159297			Other	No
chr14:101639687-101640187	TSS	Commd6	Commd6 chr14:101639687-101640187			Promoter	No
chr14:101640195-101640695	TSS	Commd6	Commd6 chr14:101640195-101640695			Promoter	Yes
chr5:72167850-72168350	TSS	Commd8	Commd8 chr5:72167850-72168350	-0.259853	2.65552e-08	Promoter	Yes
chr8:13888982-13889482	TSS	Coprs	Coprs chr8:13888982-13889482			PEs	No
chr8:13889562-13890062	TSS	Coprs	Coprs chr8:13889562-13890062			Promoter	No
chr8:13890191-13890691	TSS	Coprs	Coprs chr8:13890191-13890691			Promoter	No
chr8:13890841-13891341	TSS	Coprs	Coprs chr8:13890841-13891341			Other	No
chr1:55052432-55052932	TSS	Coq10b	Coq10b chr1:55052432-55052932	-0.350456	9.57158e-15	Promoter	Yes
chr1:55053033-55053533	TSS	Coq10b	Coq10b chr1:55053033-55053533			Promoter	No
chr19:4148294-4148794	TSS	Coro1b	Coro1b chr19:4148294-4148794			Promoter	No
chr16:38346964-38347464	TSS	Cox17	Cox17 chr16:38346964-38347464	0.305721	2.8352e-11	Promoter	Yes
chr5:115347552-115348052	TSS	Cox6a1	Cox6a1 chr5:115347552-115348052			Promoter	No
chr5:115348742-115349242	TSS	Cox6a1	Cox6a1 chr5:115348742-115349242			Promoter	Yes
chr11:31870499-31870999	TSS	Cpeb4	Cpeb4 chr11:31870499-31870999			Promoter	Yes
chr11:31871197-31871697	TSS	Cpeb4	Cpeb4 chr11:31871197-31871697			Promoter	Yes
chr5:108549718-108550218	TSS	Cplx1	Cplx1 chr5:108549718-108550218			Promoter	No
chr5:108550226-108550726	TSS	Cplx1	Cplx1 chr5:108550226-108550726	0.252808	6.77324e-08	Promoter	No
chr9:57605447-57605947	TSS	Cplx3	Cplx3 chr9:57605447-57605947	0.887287	2.45692e-165	Promoter	Yes
chr9:57606144-57606644	TSS	Cplx3	Cplx3 chr9:57606144-57606644	0.693318	2.1992e-70	Promoter	Yes
chr9:57606723-57607223	TSS	Cplx3	Cplx3 chr9:57606723-57607223			AEs	Yes
chr18:65969451-65969951	TSS	Cplx4	Cplx4 chr18:65969451-65969951	0.77641	6.42752e-99	PEs	Yes
chr18:65970018-65970518	TSS	Cplx4	Cplx4 chr18:65970018-65970518	0.624025	3.72644e-53	PEs	Yes
chr9:54763909-54764409	TSS	Crabp1	Crabp1 chr9:54763909-54764409			Other	No
chr9:54764527-54765027	TSS	Crabp1	Crabp1 chr9:54764527-54765027	0.299759	7.4356e-11	PEs	Yes
chr9:54765286-54765786	TSS	Crabp1	Crabp1 chr9:54765286-54765786			PEs	Yes
chr5:130029062-130029562	TSS	Crcp	Crcp chr5:130029062-130029562			Promoter	No
chr7:90442734-90443234	TSS	Crebzf	Crebzf chr7:90442734-90443234			Promoter	Yes
chr7:90443439-90443939	TSS	Crebzf	Crebzf chr7:90443439-90443939	0.626467	1.09093e-53	Promoter	Yes
chr15:88819092-88819592	TSS	Creld2	Creld2 chr15:88819092-88819592	0.494306	1.58842e-30	Promoter	Yes
chr15:88819769-88820269	TSS	Creld2	Creld2 chr15:88819769-88820269			Promoter	Yes
chr15:88820356-88820856	TSS	Creld2	Creld2 chr15:88820356-88820856			Promoter	No
chr5:37240583-37241083	TSS	Crmp1	Crmp1 chr5:37240583-37241083			PEs	No
chr5:37241091-37241591	TSS	Crmp1	Crmp1 chr5:37241091-37241591			PEs	Yes
chr5:37241708-37242208	TSS	Crmp1	Crmp1 chr5:37241708-37242208			Promoter	No
chr5:37242422-37242922	TSS	Crmp1	Crmp1 chr5:37242422-37242922			Promoter	Yes
chr8:70438911-70439411	TSS	Crtc1	Crtc1 chr8:70438911-70439411			Promoter	No
chr8:70439530-70440030	TSS	Crtc1	Crtc1 chr8:70439530-70440030			Promoter	Yes
chr5:113080373-113080873	TSS	Crybb3	Crybb3 chr5:113080373-113080873			Other	Yes
chr5:113081374-113081874	TSS	Crybb3	Crybb3 chr5:113081374-113081874			Other	Yes
chr5:113082281-113082781	TSS	Crybb3	Crybb3 chr5:113082281-113082781			Other	No
chr15:81936491-81936991	TSS	Csdc2	Csdc2 chr15:81936491-81936991			Promoter	No
chr15:81937226-81937726	TSS	Csdc2	Csdc2 chr15:81937226-81937726	0.308935	1.66969e-11	Promoter	No
chr8:95487686-95488186	TSS	Csnk2a2	Csnk2a2 chr8:95487686-95488186			Promoter	Yes
chr8:95488674-95489174	TSS	Csnk2a2	Csnk2a2 chr8:95488674-95489174			Promoter	No
chr2:65845534-65846034	TSS	Csrnp3	Csrnp3 chr2:65845534-65846034	0.281795	1.18504e-09	Promoter	Yes
chr2:65846457-65846957	TSS	Csrnp3	Csrnp3 chr2:65846457-65846957			Promoter	No
chr10:78425423-78425923	TSS	Cstb	Cstb chr10:78425423-78425923			Promoter	No
chr10:78426263-78426763	TSS	Cstb	Cstb chr10:78426263-78426763			Promoter	No
chr7:133122362-133122862	TSS	Ctbp2	Ctbp2 chr7:133122362-133122862			Promoter	No
chr7:133123170-133123670	TSS	Ctbp2	Ctbp2 chr7:133123170-133123670	0.497437	5.81674e-31	Promoter	Yes
chr7:133124093-133124593	TSS	Ctbp2	Ctbp2 chr7:133124093-133124593			Promoter	No
chr11:69980006-69980506	TSS	Ctdnep1	Ctdnep1 chr11:69980006-69980506			Promoter	Yes
chr11:69980509-69981009	TSS	Ctdnep1	Ctdnep1 chr11:69980509-69981009			Promoter	Yes
chr11:69981229-69981729	TSS	Ctdnep1	Ctdnep1 chr11:69981229-69981729			Promoter	Yes
chr2:84649713-84650213	TSS	Ctnnd1	Ctnnd1 chr2:84649713-84650213			Promoter	Yes
chr2:84650502-84651002	TSS	Ctnnd1	Ctnnd1 chr2:84650502-84651002			Promoter	Yes
chr2:84651116-84651616	TSS	Ctnnd1	Ctnnd1 chr2:84651116-84651616			Promoter	No
chr2:84651636-84652136	TSS	Ctnnd1	Ctnnd1 chr2:84651636-84652136			Other	No
chr9:90054235-90054735	TSS	Ctsh	Ctsh chr9:90054235-90054735			PEs	Yes
chr6:18513461-18513961	TSS	Cttnbp2	Cttnbp2 chr6:18513461-18513961			Promoter	Yes
chr6:18514060-18514560	TSS	Cttnbp2	Cttnbp2 chr6:18514060-18514560			Promoter	No
chr6:18514602-18515102	TSS	Cttnbp2	Cttnbp2 chr6:18514602-18515102			Promoter	No
chr7:43671685-43672185	TSS	Ctu1	Ctu1 chr7:43671685-43672185			Promoter	Yes
chr7:43672410-43672910	TSS	Ctu1	Ctu1 chr7:43672410-43672910			Promoter	No
chr1:80339509-80340009	TSS	Cul3	Cul3 chr1:80339509-80340009	0.274263	3.561e-09	Promoter	No
chr1:80340203-80340703	TSS	Cul3	Cul3 chr1:80340203-80340703			Promoter	No
chr1:80340756-80341256	TSS	Cul3	Cul3 chr1:80340756-80341256			Promoter	No
chr1:80341413-80341913	TSS	Cul3	Cul3 chr1:80341413-80341913			Other	No
chr17:26938518-26939018	TSS	Cuta	Cuta chr17:26938518-26939018			Promoter	Yes
chr17:26939336-26939836	TSS	Cuta	Cuta chr17:26939336-26939836			Promoter	Yes
chr17:26939959-26940459	TSS	Cuta	Cuta chr17:26939959-26940459			Promoter	Yes
chr9:14499696-14500196	TSS	Cwc15	Cwc15 chr9:14499696-14500196			Promoter	No
chr9:14500219-14500719	TSS	Cwc15	Cwc15 chr9:14500219-14500719			Promoter	No
chr9:3403073-3403573	TSS	Cwf19l2	Cwf19l2 chr9:3403073-3403573			Promoter	No
chr9:3403739-3404239	TSS	Cwf19l2	Cwf19l2 chr9:3403739-3404239			Promoter	Yes
chr9:3404411-3404911	TSS	Cwf19l2	Cwf19l2 chr9:3404411-3404911	0.252739	6.83443e-08	Promoter	No
chr16:78300858-78301358	TSS	Cxadr	Cxadr chr16:78300858-78301358			Promoter	Yes
chr16:78301435-78301935	TSS	Cxadr	Cxadr chr16:78301435-78301935			Promoter	Yes
chr16:78302290-78302790	TSS	Cxadr	Cxadr chr16:78302290-78302790			Promoter	Yes
chr15:83171695-83172195	TSS	Cyb5r3	Cyb5r3 chr15:83171695-83172195			Promoter	No
chr15:76343216-76343716	TSS	Cyc1	Cyc1 chr15:76343216-76343716			Promoter	Yes
chr15:76343731-76344231	TSS	Cyc1	Cyc1 chr15:76343731-76344231			Promoter	Yes
chr15:76344294-76344794	TSS	Cyc1	Cyc1 chr15:76344294-76344794			Promoter	Yes
chr12:71830080-71830580	TSS	Daam1	Daam1 chr12:71830080-71830580			Promoter	Yes
chr12:71830783-71831283	TSS	Daam1	Daam1 chr12:71830783-71831283	-0.387099	4.7404e-18	Promoter	Yes
chr12:71831421-71831921	TSS	Daam1	Daam1 chr12:71831421-71831921			Promoter	No
chr14:98168760-98169260	TSS	Dach1	Dach1 chr14:98168760-98169260	-0.281658	1.20928e-09	Promoter	No
chr14:98169652-98170152	TSS	Dach1	Dach1 chr14:98169652-98170152			Promoter	Yes
chr2:164484928-164485428	TSS	Dbndd2	Dbndd2 chr2:164484928-164485428			Other	No
chr2:164486033-164486533	TSS	Dbndd2	Dbndd2 chr2:164486033-164486533	0.427952	2.81869e-22	Promoter	Yes
chr2:164486734-164487234	TSS	Dbndd2	Dbndd2 chr2:164486734-164487234	0.599826	4.01394e-48	Promoter	Yes
chr6:83165438-83165938	TSS	Dctn1	Dctn1 chr6:83165438-83165938			Promoter	Yes
chr6:83166299-83166799	TSS	Dctn1	Dctn1 chr6:83166299-83166799			Promoter	Yes
chr8:34107610-34108110	TSS	Dctn6	Dctn6 chr8:34107610-34108110			Promoter	No
chr8:34108302-34108802	TSS	Dctn6	Dctn6 chr8:34108302-34108802			Promoter	Yes
chr8:13287262-13287762	TSS	Dcun1d2	Dcun1d2 chr8:13287262-13287762	0.345258	2.60115e-14	Promoter	Yes
chr8:13287954-13288454	TSS	Dcun1d2	Dcun1d2 chr8:13287954-13288454			Promoter	No
chr8:13288708-13289208	TSS	Dcun1d2	Dcun1d2 chr8:13288708-13289208			Promoter	No
chr14:45656991-45657491	TSS	Ddhd1	Ddhd1 chr14:45656991-45657491	0.353499	5.28452e-15	Promoter	Yes
chr14:45657998-45658498	TSS	Ddhd1	Ddhd1 chr14:45657998-45658498			Promoter	No
chr14:45658553-45659053	TSS	Ddhd1	Ddhd1 chr14:45658553-45659053			Promoter	No
chr10:59950558-59951058	TSS	Ddit4	Ddit4 chr10:59950558-59951058			Promoter	Yes
chr10:59951119-59951619	TSS	Ddit4	Ddit4 chr10:59951119-59951619			Promoter	Yes
chr10:59951674-59952174	TSS	Ddit4	Ddit4 chr10:59951674-59952174			Promoter	Yes
chr10:59952444-59952944	TSS	Ddit4	Ddit4 chr10:59952444-59952944	0.25039	9.27767e-08	Promoter	Yes
chr15:79545830-79546330	TSS	Ddx17	Ddx17 chr15:79545830-79546330	0.355018	3.91822e-15	Promoter	Yes
chr15:79546437-79546937	TSS	Ddx17	Ddx17 chr15:79546437-79546937			Promoter	Yes
chr15:79547073-79547573	TSS	Ddx17	Ddx17 chr15:79547073-79547573			Promoter	No
chr15:98662078-98662578	TSS	Ddx23	Ddx23 chr15:98662078-98662578			Promoter	Yes
chr15:98662714-98663214	TSS	Ddx23	Ddx23 chr15:98662714-98663214			Promoter	Yes
chr8:70302257-70302757	TSS	Ddx49	Ddx49 chr8:70302257-70302757			Promoter	Yes
chr8:70302888-70303388	TSS	Ddx49	Ddx49 chr8:70302888-70303388			Promoter	No
chr14:26572626-26573126	TSS	Dennd6a	Dennd6a chr14:26572626-26573126			AEs	No
chr14:26573549-26574049	TSS	Dennd6a	Dennd6a chr14:26573549-26574049			PEs	No
chr16:10542278-10542778	TSS	Dexi	Dexi chr16:10542278-10542778			Promoter	Yes
chr16:10542845-10543345	TSS	Dexi	Dexi chr16:10542845-10543345			Promoter	Yes
chr8:85071011-85071511	TSS	Dhps	Dhps chr8:85071011-85071511			Promoter	No
chr8:85071850-85072350	TSS	Dhps	Dhps chr8:85071850-85072350			Promoter	Yes
chr12:72663840-72664340	TSS	Dhrs7	Dhrs7 chr12:72663840-72664340			Promoter	No
chr12:72664610-72665110	TSS	Dhrs7	Dhrs7 chr12:72664610-72665110	0.312965	8.51852e-12	Promoter	Yes
chr13:112926701-112927201	TSS	Dhx29	Dhx29 chr13:112926701-112927201	0.292143	2.46687e-10	Promoter	Yes
chr13:112927387-112927887	TSS	Dhx29	Dhx29 chr13:112927387-112927887	0.38358	1.02881e-17	Promoter	Yes
chr13:112928039-112928539	TSS	Dhx29	Dhx29 chr13:112928039-112928539			Promoter	Yes
chr13:112928607-112929107	TSS	Dhx29	Dhx29 chr13:112928607-112929107			PEs	No
chr3:62505767-62506267	TSS	Dhx36	Dhx36 chr3:62505767-62506267			Promoter	No
chr3:62506303-62506803	TSS	Dhx36	Dhx36 chr3:62506303-62506803			Promoter	No
chr3:62506816-62507316	TSS	Dhx36	Dhx36 chr3:62506816-62507316			Promoter	Yes
chr1:153486676-153487176	TSS	Dhx9	Dhx9 chr1:153486676-153487176			Promoter	No
chr1:153487464-153487964	TSS	Dhx9	Dhx9 chr1:153487464-153487964			Promoter	Yes
chr12:104751157-104751657	TSS	Dicer1	Dicer1 chr12:104751157-104751657			Promoter	No
chr12:104751981-104752481	TSS	Dicer1	Dicer1 chr12:104751981-104752481	0.390617	2.16406e-18	Promoter	No
chr16:35768587-35769087	TSS	Dirc2	Dirc2 chr16:35768587-35769087			Promoter	No
chr16:35769103-35769603	TSS	Dirc2	Dirc2 chr16:35769103-35769603			Promoter	Yes
chr16:35770101-35770601	TSS	Dirc2	Dirc2 chr16:35770101-35770601			Promoter	Yes
chr8:22623054-22623554	TSS	Dkk4	Dkk4 chr8:22623054-22623554			Other	No
chr7:45211955-45212455	TSS	Dkkl1	Dkkl1 chr7:45211955-45212455			Other	No
chr7:45212783-45213283	TSS	Dkkl1	Dkkl1 chr7:45212783-45213283			Other	No
chr7:91090593-91091093	TSS	Dlg2	Dlg2 chr7:91090593-91091093			PEs	No
chr7:91091182-91091682	TSS	Dlg2	Dlg2 chr7:91091182-91091682			PEs	No
chr4:40721088-40721588	TSS	Dnaja1	Dnaja1 chr4:40721088-40721588			PEs	No
chr4:40722190-40722690	TSS	Dnaja1	Dnaja1 chr4:40722190-40722690	-0.483095	5.32176e-29	Promoter	Yes
chr4:40722981-40723481	TSS	Dnaja1	Dnaja1 chr4:40722981-40723481	-0.284244	8.22698e-10	Promoter	Yes
chr2:26351859-26352359	TSS	Dnlz	Dnlz chr2:26351859-26352359			Promoter	Yes
chr2:26352637-26353137	TSS	Dnlz	Dnlz chr2:26352637-26353137			Promoter	No
chr18:89768746-89769246	TSS	Dok6	Dok6 chr18:89768746-89769246			Promoter	No
chr18:89769340-89769840	TSS	Dok6	Dok6 chr18:89769340-89769840			Promoter	No
chr12:83486276-83486776	TSS	Dpf3	Dpf3 chr12:83486276-83486776	0.47635	4.14268e-28	Promoter	Yes
chr12:83486817-83487317	TSS	Dpf3	Dpf3 chr12:83486817-83487317	0.445069	3.12353e-24	Promoter	Yes
chr12:83487543-83488043	TSS	Dpf3	Dpf3 chr12:83487543-83488043	0.588314	7.09092e-46	Promoter	Yes
chr12:83488130-83488630	TSS	Dpf3	Dpf3 chr12:83488130-83488630			Promoter	Yes
chr2:24962159-24962659	TSS	Dph7	Dph7 chr2:24962159-24962659			Promoter	Yes
chr2:168229596-168230096	TSS	Dpm1	Dpm1 chr2:168229596-168230096			Promoter	Yes
chr2:168230112-168230612	TSS	Dpm1	Dpm1 chr2:168230112-168230612			Promoter	Yes
chr2:168230684-168231184	TSS	Dpm1	Dpm1 chr2:168230684-168231184			Promoter	Yes
chr2:168231248-168231748	TSS	Dpm1	Dpm1 chr2:168231248-168231748			Promoter	Yes
chr9:65032129-65032629	TSS	Dpp8	Dpp8 chr9:65032129-65032629			Promoter	Yes
chr9:65032770-65033270	TSS	Dpp8	Dpp8 chr9:65032770-65033270	-0.255211	4.93828e-08	Promoter	Yes
chr7:35753194-35753694	TSS	Dpy19l3	Dpy19l3 chr7:35753194-35753694			PEs	No
chr7:35754151-35754651	TSS	Dpy19l3	Dpy19l3 chr7:35754151-35754651	0.361233	1.13222e-15	Promoter	Yes
chr5:30711227-30711727	TSS	Dpysl5	Dpysl5 chr5:30711227-30711727			Promoter	Yes
chr5:30712324-30712824	TSS	Dpysl5	Dpysl5 chr5:30712324-30712824			Promoter	Yes
chr19:5423840-5424340	TSS	Drap1	Drap1 chr19:5423840-5424340			Promoter	Yes
chr19:5424657-5425157	TSS	Drap1	Drap1 chr19:5424657-5425157			Promoter	No
chr19:5425356-5425856	TSS	Drap1	Drap1 chr19:5425356-5425856			Promoter	No
chr7:141291806-141292306	TSS	Drd4	Drd4 chr7:141291806-141292306	0.295349	1.49594e-10	PEs	Yes
chr7:141292906-141293406	TSS	Drd4	Drd4 chr7:141292906-141293406	0.570474	1.43325e-42	PEs	Yes
chr9:45425509-45426009	TSS	Dscaml1	Dscaml1 chr9:45425509-45426009			PEs	Yes
chr9:45426390-45426890	TSS	Dscaml1	Dscaml1 chr9:45426390-45426890			PEs	No
chr9:45426894-45427394	TSS	Dscaml1	Dscaml1 chr9:45426894-45427394			PEs	Yes
chr1:33906772-33907272	TSS	Dst	Dst chr1:33906772-33907272			Promoter	No
chr1:33907360-33907860	TSS	Dst	Dst chr1:33907360-33907860			Promoter	Yes
chr1:33907898-33908398	TSS	Dst	Dst chr1:33907898-33908398			Promoter	No
chr2:143915127-143915627	TSS	Dstn	Dstn chr2:143915127-143915627			Promoter	Yes
chr2:143915710-143916210	TSS	Dstn	Dstn chr2:143915710-143916210			Promoter	Yes
chr2:144599786-144600286	TSS	Dtd1	Dtd1 chr2:144599786-144600286			Promoter	Yes
chr2:144600342-144600842	TSS	Dtd1	Dtd1 chr2:144600342-144600842			Promoter	Yes
chr18:23309251-23309751	TSS	Dtna	Dtna chr18:23309251-23309751			Other	No
chr18:23309828-23310328	TSS	Dtna	Dtna chr18:23309828-23310328			Promoter	No
chr18:23310680-23311180	TSS	Dtna	Dtna chr18:23310680-23311180			Promoter	No
chr1:170885219-170885719	TSS	Dusp12	Dusp12 chr1:170885219-170885719			Promoter	Yes
chr2:127336076-127336576	TSS	Dusp2	Dusp2 chr2:127336076-127336576			Other	No
chr2:127337152-127337652	TSS	Dusp2	Dusp2 chr2:127337152-127337652			Other	Yes
chr4:155847224-155847724	TSS	Dvl1	Dvl1 chr4:155847224-155847724	-0.285706	6.60342e-10	Promoter	No
chr4:155847743-155848243	TSS	Dvl1	Dvl1 chr4:155847743-155848243			Promoter	Yes
chr12:110601151-110601651	TSS	Dync1h1	Dync1h1 chr12:110601151-110601651			Promoter	No
chr12:110601708-110602208	TSS	Dync1h1	Dync1h1 chr12:110601708-110602208			Promoter	Yes
chr2:71211434-71211934	TSS	Dync1i2	Dync1i2 chr2:71211434-71211934	0.299339	7.95037e-11	Promoter	Yes
chr2:71211937-71212437	TSS	Dync1i2	Dync1i2 chr2:71211937-71212437			Promoter	Yes
chr8:104441567-104442067	TSS	Dync1li2	Dync1li2 chr8:104441567-104442067			Promoter	Yes
chr8:104442131-104442631	TSS	Dync1li2	Dync1li2 chr8:104442131-104442631			Promoter	Yes
chr8:104442801-104443301	TSS	Dync1li2	Dync1li2 chr8:104442801-104443301			Promoter	Yes
chr10:118867541-118868041	TSS	Dyrk2	Dyrk2 chr10:118867541-118868041			Promoter	No
chr10:118868074-118868574	TSS	Dyrk2	Dyrk2 chr10:118868074-118868574			Promoter	Yes
chr10:118868597-118869097	TSS	Dyrk2	Dyrk2 chr10:118868597-118869097			Promoter	Yes
chr10:118869184-118869684	TSS	Dyrk2	Dyrk2 chr10:118869184-118869684	0.345129	2.66581e-14	Promoter	Yes
chr7:140115449-140115949	TSS	Echs1	Echs1 chr7:140115449-140115949	0.293175	2.10188e-10	Promoter	Yes
chr7:140116179-140116679	TSS	Echs1	Echs1 chr7:140116179-140116679			Promoter	Yes
chr10:18209483-18209983	TSS	Ect2l	Ect2l chr10:18209483-18209983			Other	No
chr2:25557489-25557989	TSS	Edf1	Edf1 chr2:25557489-25557989			Promoter	Yes
chr2:25558065-25558565	TSS	Edf1	Edf1 chr2:25558065-25558565			Promoter	No
chr2:25558753-25559253	TSS	Edf1	Edf1 chr2:25558753-25559253			PEs	No
chr13:88820730-88821230	TSS	Edil3	Edil3 chr13:88820730-88821230			PEs	Yes
chr13:88821272-88821772	TSS	Edil3	Edil3 chr13:88821272-88821772			Promoter	Yes
chr13:88821898-88822398	TSS	Edil3	Edil3 chr13:88821898-88822398			Promoter	Yes
chr13:88822399-88822899	TSS	Edil3	Edil3 chr13:88822399-88822899			Promoter	Yes
chr1:63176025-63176525	TSS	Eef1b2	Eef1b2 chr1:63176025-63176525	-0.53817	4.42585e-37	Promoter	Yes
chr1:63176533-63177033	TSS	Eef1b2	Eef1b2 chr1:63176533-63177033	-0.613667	6.01678e-51	Promoter	Yes
chr1:63177107-63177607	TSS	Eef1b2	Eef1b2 chr1:63177107-63177607			Promoter	Yes
chr1:63177634-63178134	TSS	Eef1b2	Eef1b2 chr1:63177634-63178134			Promoter	No
chr8:124948268-124948768	TSS	Egln1	Egln1 chr8:124948268-124948768			Promoter	No
chr8:124949168-124949668	TSS	Egln1	Egln1 chr8:124949168-124949668			Promoter	Yes
chr8:124949990-124950490	TSS	Egln1	Egln1 chr8:124949990-124950490			Promoter	No
chr2:125672753-125673253	TSS	Eid1	Eid1 chr2:125672753-125673253	0.476123	4.43508e-28	Promoter	No
chr2:125673287-125673787	TSS	Eid1	Eid1 chr2:125673287-125673787			Promoter	Yes
chr7:28267564-28268064	TSS	Eid2	Eid2 chr7:28267564-28268064	0.320437	2.3769e-12	Promoter	Yes
chr7:28268073-28268573	TSS	Eid2	Eid2 chr7:28268073-28268573	0.336384	1.37223e-13	Promoter	Yes
chr19:5366048-5366548	TSS	Eif1ad	Eif1ad chr19:5366048-5366548			Promoter	Yes
chr19:5366698-5367198	TSS	Eif1ad	Eif1ad chr19:5366698-5367198			Promoter	No
chr19:5367431-5367931	TSS	Eif1ad	Eif1ad chr19:5367431-5367931			Promoter	No
chr9:120491574-120492074	TSS	Eif1b	Eif1b chr9:120491574-120492074			Promoter	No
chr9:120492378-120492878	TSS	Eif1b	Eif1b chr9:120492378-120492878	-0.358977	1.78234e-15	Promoter	Yes
chr9:120492995-120493495	TSS	Eif1b	Eif1b chr9:120492995-120493495			Promoter	No
chr5:143816944-143817444	TSS	Eif2ak1	Eif2ak1 chr5:143816944-143817444			Promoter	No
chr5:143817450-143817950	TSS	Eif2ak1	Eif2ak1 chr5:143817450-143817950			Promoter	Yes
chr2:118388272-118388772	TSS	Eif2ak4	Eif2ak4 chr2:118388272-118388772			Promoter	Yes
chr2:118388853-118389353	TSS	Eif2ak4	Eif2ak4 chr2:118388853-118389353			Promoter	No
chr4:117019177-117019677	TSS	Eif2b3	Eif2b3 chr4:117019177-117019677	0.436433	3.127e-23	Promoter	Yes
chr4:117019699-117020199	TSS	Eif2b3	Eif2b3 chr4:117019699-117020199			Promoter	Yes
chr7:28981578-28982078	TSS	Eif3k	Eif3k chr7:28981578-28982078	-0.47326	1.04337e-27	Promoter	Yes
chr7:28982198-28982698	TSS	Eif3k	Eif3k chr7:28982198-28982698			Promoter	Yes
chr16:23107160-23107660	TSS	Eif4a2	Eif4a2 chr16:23107160-23107660			Promoter	No
chr16:23108068-23108568	TSS	Eif4a2	Eif4a2 chr16:23108068-23108568			Promoter	No
chr15:102072403-102072903	TSS	Eif4b	Eif4b chr15:102072403-102072903			Other	No
chr15:102073455-102073955	TSS	Eif4b	Eif4b chr15:102073455-102073955	-0.289491	3.71234e-10	Promoter	Yes
chr15:102074245-102074745	TSS	Eif4b	Eif4b chr15:102074245-102074745			Promoter	Yes
chr18:36663404-36663904	TSS	Eif4ebp3	Eif4ebp3 chr18:36663404-36663904			AEs	No
chr3:28780907-28781407	TSS	Eif5a2	Eif5a2 chr3:28780907-28781407	-0.272477	4.59884e-09	Promoter	Yes
chr3:28781450-28781950	TSS	Eif5a2	Eif5a2 chr3:28781450-28781950			Promoter	Yes
chr6:72598159-72598659	TSS	Elmod3	Elmod3 chr6:72598159-72598659			Promoter	No
chr6:72598718-72599218	TSS	Elmod3	Elmod3 chr6:72598718-72599218			Promoter	Yes
chr2:112367154-112367654	TSS	Emc4	Emc4 chr2:112367154-112367654			Promoter	Yes
chr2:112367681-112368181	TSS	Emc4	Emc4 chr2:112367681-112368181			Promoter	Yes
chr2:112368218-112368718	TSS	Emc4	Emc4 chr2:112368218-112368718			Promoter	No
chr2:112368724-112369224	TSS	Emc4	Emc4 chr2:112368724-112369224			PEs	No
chr11:73176350-73176850	TSS	Emc6	Emc6 chr11:73176350-73176850			Promoter	Yes
chr11:73176920-73177420	TSS	Emc6	Emc6 chr11:73176920-73177420			Promoter	Yes
chr11:73177449-73177949	TSS	Emc6	Emc6 chr11:73177449-73177949	0.422867	1.02155e-21	Promoter	Yes
chr8:120666943-120667443	TSS	Emc8	Emc8 chr8:120666943-120667443			Promoter	No
chr8:120667467-120667967	TSS	Emc8	Emc8 chr8:120667467-120667967			Promoter	Yes
chr8:120667975-120668475	TSS	Emc8	Emc8 chr8:120667975-120668475	-0.270675	5.94031e-09	Promoter	Yes
chr17:24894362-24894862	TSS	Eme2	Eme2 chr17:24894362-24894862			Promoter	No
chr17:24894866-24895366	TSS	Eme2	Eme2 chr17:24894866-24895366			Promoter	Yes
chr17:24895452-24895952	TSS	Eme2	Eme2 chr17:24895452-24895952			Promoter	Yes
chr12:108370604-108371104	TSS	Eml1	Eml1 chr12:108370604-108371104			PEs	Yes
chr12:108371820-108372320	TSS	Eml1	Eml1 chr12:108371820-108372320			Other	No
chr19:8928521-8929021	TSS	Eml3	Eml3 chr19:8928521-8929021	0.585847	2.09021e-45	Promoter	Yes
chr19:8929039-8929539	TSS	Eml3	Eml3 chr19:8929039-8929539	0.703028	3.36658e-73	Promoter	Yes
chr19:8929652-8930152	TSS	Eml3	Eml3 chr19:8929652-8930152	0.590609	2.5719e-46	Promoter	Yes
chr19:8930231-8930731	TSS	Eml3	Eml3 chr19:8930231-8930731			Promoter	No
chr17:83350118-83350618	TSS	Eml4	Eml4 chr17:83350118-83350618			Promoter	Yes
chr17:83350748-83351248	TSS	Eml4	Eml4 chr17:83350748-83351248			Promoter	Yes
chr17:83351534-83352034	TSS	Eml4	Eml4 chr17:83351534-83352034			Promoter	Yes
chr6:124768730-124769230	TSS	Eno2	Eno2 chr6:124768730-124769230			Promoter	Yes
chr6:124769405-124769905	TSS	Eno2	Eno2 chr6:124769405-124769905	0.512145	4.47676e-33	Promoter	No
chr3:95623548-95624048	TSS	Ensa	Ensa chr3:95623548-95624048			Other	No
chr3:95624065-95624565	TSS	Ensa	Ensa chr3:95624065-95624565			Other	No
chr3:95624614-95625114	TSS	Ensa	Ensa chr3:95624614-95625114	0.299243	8.07343e-11	Promoter	Yes
chr3:95625393-95625893	TSS	Ensa	Ensa chr3:95625393-95625893			Promoter	Yes
chr6:97147514-97148014	TSS	Eogt	Eogt chr6:97147514-97148014			AEs	No
chr6:97148466-97148966	TSS	Eogt	Eogt chr6:97148466-97148966			Promoter	No
chr6:97149008-97149508	TSS	Eogt	Eogt chr6:97149008-97149508			Promoter	No
chr15:81584905-81585405	TSS	Ep300	Ep300 chr15:81584905-81585405			Promoter	Yes
chr15:81585867-81586367	TSS	Ep300	Ep300 chr15:81585867-81586367			Promoter	Yes
chr15:81586454-81586954	TSS	Ep300	Ep300 chr15:81586454-81586954			Promoter	Yes
chr4:132073900-132074400	TSS	Epb41	Epb41 chr4:132073900-132074400			Promoter	No
chr4:132074465-132074965	TSS	Epb41	Epb41 chr4:132074465-132074965			Promoter	Yes
chr4:132075107-132075607	TSS	Epb41	Epb41 chr4:132075107-132075607	0.662616	3.52401e-62	Promoter	Yes
chr4:132075872-132076372	TSS	Epb41	Epb41 chr4:132075872-132076372			PEs	Yes
chr2:156420674-156421174	TSS	Epb41l1	Epb41l1 chr2:156420674-156421174	0.442473	6.28438e-24	Promoter	Yes
chr2:156421644-156422144	TSS	Epb41l1	Epb41l1 chr2:156421644-156422144	0.510353	8.20419e-33	Promoter	Yes
chr17:69155700-69156200	TSS	Epb41l3	Epb41l3 chr17:69155700-69156200			PEs	No
chr17:69156518-69157018	TSS	Epb41l3	Epb41l3 chr17:69156518-69157018			Promoter	Yes
chr17:69157139-69157639	TSS	Epb41l3	Epb41l3 chr17:69157139-69157639			Promoter	Yes
chr17:69157655-69158155	TSS	Epb41l3	Epb41l3 chr17:69157655-69158155			Promoter	Yes
chr18:6514669-6515169	TSS	Epc1	Epc1 chr18:6514669-6515169			Promoter	No
chr18:6515981-6516481	TSS	Epc1	Epc1 chr18:6515981-6516481			Promoter	Yes
chr18:6516985-6517485	TSS	Epc1	Epc1 chr18:6516985-6517485			PEs	No
chr9:111270865-111271365	TSS	Epm2aip1	Epm2aip1 chr9:111270865-111271365			Promoter	No
chr9:111271376-111271876	TSS	Epm2aip1	Epm2aip1 chr9:111271376-111271876	0.288404	4.38393e-10	Promoter	Yes
chr9:111272036-111272536	TSS	Epm2aip1	Epm2aip1 chr9:111272036-111272536			Promoter	Yes
chr11:61578850-61579350	TSS	Epn2	Epn2 chr11:61578850-61579350			Promoter	Yes
chr11:61579372-61579872	TSS	Epn2	Epn2 chr11:61579372-61579872	0.42086	1.6867e-21	Promoter	No
chr6:137648255-137648755	TSS	Eps8	Eps8 chr6:137648255-137648755			Promoter	Yes
chr6:137648903-137649403	TSS	Eps8	Eps8 chr6:137648903-137649403	0.539619	2.58398e-37	Promoter	Yes
chr6:137649503-137650003	TSS	Eps8	Eps8 chr6:137649503-137650003	0.414439	8.20174e-21	PEs	Yes
chr8:27022863-27023363	TSS	Erlin2	Erlin2 chr8:27022863-27023363			Promoter	Yes
chr8:27023606-27024106	TSS	Erlin2	Erlin2 chr8:27023606-27024106			Promoter	Yes
chr8:27024345-27024845	TSS	Erlin2	Erlin2 chr8:27024345-27024845			Promoter	No
chr9:37527075-37527575	TSS	Esam	Esam chr9:37527075-37527575			PEs	Yes
chr9:37527749-37528249	TSS	Esam	Esam chr9:37527749-37528249			PEs	Yes
chr9:37528396-37528896	TSS	Esam	Esam chr9:37528396-37528896			PEs	Yes
chr18:10609436-10609936	TSS	Esco1	Esco1 chr18:10609436-10609936			Promoter	Yes
chr18:10610001-10610501	TSS	Esco1	Esco1 chr18:10610001-10610501			Promoter	Yes
chr2:140169810-140170310	TSS	Esf1	Esf1 chr2:140169810-140170310			Promoter	No
chr2:140170334-140170834	TSS	Esf1	Esf1 chr2:140170334-140170834	-0.290724	3.07133e-10	Promoter	Yes
chr2:140171195-140171695	TSS	Esf1	Esf1 chr2:140171195-140171695			Promoter	No
chr1:187608058-187608558	TSS	Esrrg	Esrrg chr1:187608058-187608558			PEs	No
chr1:187609331-187609831	TSS	Esrrg	Esrrg chr1:187609331-187609831			PEs	No
chr7:43443096-43443596	TSS	Etfb	Etfb chr7:43443096-43443596			Promoter	No
chr7:43443730-43444230	TSS	Etfb	Etfb chr7:43443730-43444230			Promoter	No
chr5:76528977-76529477	TSS	Exoc1	Exoc1 chr5:76528977-76529477	-0.25369	6.03382e-08	Promoter	Yes
chr5:76529643-76530143	TSS	Exoc1	Exoc1 chr5:76529643-76530143			Promoter	Yes
chr2:31670416-31670916	TSS	Exosc2	Exosc2 chr2:31670416-31670916			Promoter	Yes
chr2:31670935-31671435	TSS	Exosc2	Exosc2 chr2:31670935-31671435			Promoter	No
chr2:165594295-165594795	TSS	Eya2	Eya2 chr2:165594295-165594795			Other	No
chr2:165594982-165595482	TSS	Eya2	Eya2 chr2:165594982-165595482	0.401313	1.87347e-19	PEs	Yes
chr2:165595578-165596078	TSS	Eya2	Eya2 chr2:165595578-165596078			PEs	No
chr4:155249155-155249655	TSS	Faap20	Faap20 chr4:155249155-155249655			Promoter	No
chr4:155249704-155250204	TSS	Faap20	Faap20 chr4:155249704-155250204			Promoter	Yes
chr4:155250271-155250771	TSS	Faap20	Faap20 chr4:155250271-155250771			Promoter	Yes
chr4:130307714-130308214	TSS	Fabp3	Fabp3 chr4:130307714-130308214			PEs	Yes
chr4:130308322-130308822	TSS	Fabp3	Fabp3 chr4:130308322-130308822			Promoter	Yes
chr4:130309148-130309648	TSS	Fabp3	Fabp3 chr4:130309148-130309648			PEs	No
chr17:24849600-24850100	TSS	Fahd1	Fahd1 chr17:24849600-24850100			Promoter	Yes
chr17:24850174-24850674	TSS	Fahd1	Fahd1 chr17:24850174-24850674	0.364241	6.14664e-16	Promoter	Yes
chr17:24850946-24851446	TSS	Fahd1	Fahd1 chr17:24850946-24851446			Promoter	No
chr14:8316325-8316825	TSS	Fam107a	Fam107a chr14:8316325-8316825			PEs	No
chr14:8317331-8317831	TSS	Fam107a	Fam107a chr14:8317331-8317831			PEs	No
chr6:86364296-86364796	TSS	Fam136a	Fam136a chr6:86364296-86364796			Promoter	No
chr6:86365283-86365783	TSS	Fam136a	Fam136a chr6:86365283-86365783	-0.377137	4.14927e-17	Promoter	Yes
chr6:86365846-86366346	TSS	Fam136a	Fam136a chr6:86365846-86366346	-0.350083	1.0292e-14	Promoter	No
chr6:86366415-86366915	TSS	Fam136a	Fam136a chr6:86366415-86366915			Promoter	Yes
chr18:34505501-34506001	TSS	Fam13b	Fam13b chr18:34505501-34506001			Promoter	No
chr18:34506061-34506561	TSS	Fam13b	Fam13b chr18:34506061-34506561			Promoter	Yes
chr18:34506622-34507122	TSS	Fam13b	Fam13b chr18:34506622-34507122			Promoter	No
chr18:34507186-34507686	TSS	Fam13b	Fam13b chr18:34507186-34507686			Promoter	No
chr11:23007511-23008011	TSS	Fam161a	Fam161a chr11:23007511-23008011	0.665274	7.50751e-63	Promoter	No
chr11:23008121-23008621	TSS	Fam161a	Fam161a chr11:23008121-23008621	0.683537	1.16585e-67	Promoter	Yes
chr11:23008775-23009275	TSS	Fam161a	Fam161a chr11:23008775-23009275			Promoter	Yes
chr14:63436148-63436648	TSS	Fam167a	Fam167a chr14:63436148-63436648	0.574182	3.06312e-43	Promoter	Yes
chr17:25791594-25792094	TSS	Fam173a	Fam173a chr17:25791594-25792094			Promoter	No
chr17:25792180-25792680	TSS	Fam173a	Fam173a chr17:25792180-25792680	0.272884	4.33884e-09	Promoter	No
chr17:25792869-25793369	TSS	Fam173a	Fam173a chr17:25792869-25793369	-0.274325	3.52986e-09	Promoter	No
chr7:134937398-134937898	TSS	Fam196a	Fam196a chr7:134937398-134937898			PEs	No
chr7:134937939-134938439	TSS	Fam196a	Fam196a chr7:134937939-134938439			PEs	No
chr7:134939402-134939902	TSS	Fam196a	Fam196a chr7:134939402-134939902			Other	No
chrX:137048671-137049171	TSS	Fam199x	Fam199x chrX:137048671-137049171			Promoter	No
chrX:137049286-137049786	TSS	Fam199x	Fam199x chrX:137049286-137049786			Promoter	Yes
chrX:137049903-137050403	TSS	Fam199x	Fam199x chrX:137049903-137050403			Promoter	Yes
chr1:156718422-156718922	TSS	Fam20b	Fam20b chr1:156718422-156718922			Promoter	Yes
chr1:156719403-156719903	TSS	Fam20b	Fam20b chr1:156719403-156719903			Promoter	No
chr14:41012970-41013470	TSS	Fam213a	Fam213a chr14:41012970-41013470			Promoter	Yes
chr14:41013905-41014405	TSS	Fam213a	Fam213a chr14:41013905-41014405			PEs	No
chr4:154897966-154898466	TSS	Fam213b	Fam213b chr4:154897966-154898466			PEs	No
chr4:154898983-154899483	TSS	Fam213b	Fam213b chr4:154898983-154899483			Promoter	No
chr9:74951459-74951959	TSS	Fam214a	Fam214a chr9:74951459-74951959			Other	No
chr9:74952103-74952603	TSS	Fam214a	Fam214a chr9:74952103-74952603			Promoter	Yes
chr9:74952626-74953126	TSS	Fam214a	Fam214a chr9:74952626-74953126			Promoter	Yes
chr9:74953245-74953745	TSS	Fam214a	Fam214a chr9:74953245-74953745	0.251893	7.63259e-08	Promoter	Yes
chr6:22355708-22356208	TSS	Fam3c	Fam3c chr6:22355708-22356208	0.384922	7.6642e-18	Promoter	Yes
chr12:12261915-12262415	TSS	Fam49a	Fam49a chr12:12261915-12262415	0.319462	2.81369e-12	Promoter	No
chr12:12262586-12263086	TSS	Fam49a	Fam49a chr12:12262586-12263086			Promoter	Yes
chr2:26627687-26628187	TSS	Fam69b	Fam69b chr2:26627687-26628187			Promoter	No
chr2:26628248-26628748	TSS	Fam69b	Fam69b chr2:26628248-26628748			Promoter	No
chr2:26628798-26629298	TSS	Fam69b	Fam69b chr2:26628798-26629298			Promoter	Yes
chr19:5731520-5732020	TSS	Fam89b	Fam89b chr19:5731520-5732020			Promoter	No
chr17:75551326-75551826	TSS	Fam98a	Fam98a chr17:75551326-75551826			Promoter	Yes
chr17:75551837-75552337	TSS	Fam98a	Fam98a chr17:75551837-75552337			Promoter	Yes
chr7:64373052-64373552	TSS	Fan1	Fan1 chr7:64373052-64373552			Promoter	No
chr7:64373846-64374346	TSS	Fan1	Fan1 chr7:64373846-64374346			Promoter	No
chr14:121034399-121034899	TSS	Farp1	Farp1 chr14:121034399-121034899			PEs	No
chr14:121035285-121035785	TSS	Farp1	Farp1 chr14:121035285-121035785	-0.2648	1.35093e-08	Promoter	No
chr14:121035961-121036461	TSS	Farp1	Farp1 chr14:121035961-121036461			Promoter	No
chr14:121036528-121037028	TSS	Farp1	Farp1 chr14:121036528-121037028			Promoter	No
chr4:21930460-21930960	TSS	Faxc	Faxc chr4:21930460-21930960			Promoter	No
chr4:21931012-21931512	TSS	Faxc	Faxc chr4:21931012-21931512			Promoter	No
chr4:21931659-21932159	TSS	Faxc	Faxc chr4:21931659-21932159			Promoter	Yes
chr4:21932170-21932670	TSS	Faxc	Faxc chr4:21932170-21932670	-0.281978	1.15302e-09	Promoter	No
chr6:119478427-119478927	TSS	Fbxl14	Fbxl14 chr6:119478427-119478927			Promoter	No
chr6:119478971-119479471	TSS	Fbxl14	Fbxl14 chr6:119478971-119479471			Promoter	Yes
chr6:119479702-119480202	TSS	Fbxl14	Fbxl14 chr6:119479702-119480202	-0.291917	2.5551e-10	Promoter	Yes
chr6:119480272-119480772	TSS	Fbxl14	Fbxl14 chr6:119480272-119480772			Promoter	Yes
chr19:46326945-46327445	TSS	Fbxl15	Fbxl15 chr19:46326945-46327445			Promoter	Yes
chr19:46327478-46327978	TSS	Fbxl15	Fbxl15 chr19:46327478-46327978			Promoter	No
chr19:46328243-46328743	TSS	Fbxl15	Fbxl15 chr19:46328243-46328743			Promoter	No
chr19:46328818-46329318	TSS	Fbxl15	Fbxl15 chr19:46328818-46329318			Promoter	No
chr17:63499717-63500217	TSS	Fbxl17	Fbxl17 chr17:63499717-63500217			Promoter	No
chr17:63500394-63500894	TSS	Fbxl17	Fbxl17 chr17:63500394-63500894	-0.274269	3.5577e-09	Promoter	No
chr2:104027586-104028086	TSS	Fbxo3	Fbxo3 chr2:104027586-104028086			Promoter	Yes
chr2:104028411-104028911	TSS	Fbxo3	Fbxo3 chr2:104028411-104028911			Promoter	No
chr13:98814471-98814971	TSS	Fcho2	Fcho2 chr13:98814471-98814971	-0.304516	3.45123e-11	Promoter	No
chr13:98815014-98815514	TSS	Fcho2	Fcho2 chr13:98815014-98815514			Promoter	No
chr17:63863138-63863638	TSS	Fer	Fer chr17:63863138-63863638			Promoter	Yes
chr17:63863681-63864181	TSS	Fer	Fer chr17:63863681-63864181			Promoter	Yes
chr17:63864378-63864878	TSS	Fer	Fer chr17:63864378-63864878			Promoter	Yes
chr17:78417492-78417992	TSS	Fez2	Fez2 chr17:78417492-78417992			Promoter	Yes
chr10:94035148-94035648	TSS	Fgd6	Fgd6 chr10:94035148-94035648			Promoter	Yes
chr10:94035651-94036151	TSS	Fgd6	Fgd6 chr10:94035651-94036151			Promoter	Yes
chr10:94036276-94036776	TSS	Fgd6	Fgd6 chr10:94036276-94036776			Promoter	No
chr2:31844839-31845339	TSS	Fibcd1	Fibcd1 chr2:31844839-31845339			Other	Yes
chr2:31845749-31846249	TSS	Fibcd1	Fibcd1 chr2:31845749-31846249			PEs	Yes
chr2:31846363-31846863	TSS	Fibcd1	Fibcd1 chr2:31846363-31846863			PEs	Yes
chr2:31846904-31847404	TSS	Fibcd1	Fibcd1 chr2:31846904-31847404			PEs	No
chr19:5460357-5460857	TSS	Fibp	Fibp chr19:5460357-5460857			Promoter	Yes
chr5:136952975-136953475	TSS	Fis1	Fis1 chr5:136952975-136953475			Promoter	Yes
chr5:136953512-136954012	TSS	Fis1	Fis1 chr5:136953512-136954012			Promoter	No
chr2:113326615-113327115	TSS	Fmn1	Fmn1 chr2:113326615-113327115	0.464747	1.26786e-26	PEs	No
chr2:113327452-113327952	TSS	Fmn1	Fmn1 chr2:113327452-113327952			Promoter	Yes
chr2:31140777-31141277	TSS	Fnbp1	Fnbp1 chr2:31140777-31141277			Promoter	No
chr2:31141754-31142254	TSS	Fnbp1	Fnbp1 chr2:31141754-31142254	0.259926	2.62931e-08	Promoter	No
chr2:31142469-31142969	TSS	Fnbp1	Fnbp1 chr2:31142469-31142969			Other	No
chr4:129135825-129136325	TSS	Fndc5	Fndc5 chr4:129135825-129136325			Other	Yes
chr4:129136518-129137018	TSS	Fndc5	Fndc5 chr4:129136518-129137018			Other	No
chr4:129137485-129137985	TSS	Fndc5	Fndc5 chr4:129137485-129137985			PEs	No
chr11:121259055-121259555	TSS	Foxk2	Foxk2 chr11:121259055-121259555			Promoter	No
chr11:121259676-121260176	TSS	Foxk2	Foxk2 chr11:121259676-121260176			Promoter	No
chr11:121260459-121260959	TSS	Foxk2	Foxk2 chr11:121260459-121260959			Promoter	No
chr19:38223320-38223820	TSS	Fra10ac1	Fra10ac1 chr19:38223320-38223820			Promoter	Yes
chr19:38223830-38224330	TSS	Fra10ac1	Fra10ac1 chr19:38223830-38224330	-0.44205	7.03862e-24	Promoter	Yes
chr19:38224577-38225077	TSS	Fra10ac1	Fra10ac1 chr19:38224577-38225077	0.327392	6.9973e-13	Promoter	Yes
chr4:74012236-74012736	TSS	Frmd3	Frmd3 chr4:74012236-74012736			AEs	No
chr4:74013331-74013831	TSS	Frmd3	Frmd3 chr4:74013331-74013831	0.323757	1.33125e-12	Promoter	Yes
chr4:74013910-74014410	TSS	Frmd3	Frmd3 chr4:74013910-74014410	0.293844	1.89348e-10	Promoter	Yes
chr4:74014531-74015031	TSS	Frmd3	Frmd3 chr4:74014531-74015031			PEs	Yes
chr4:53631107-53631607	TSS	Fsd1l	Fsd1l chr4:53631107-53631607			Promoter	No
chr4:53631627-53632127	TSS	Fsd1l	Fsd1l chr4:53631627-53632127			Promoter	Yes
chr3:76074263-76074763	TSS	Fstl5	Fstl5 chr3:76074263-76074763			PEs	No
chr3:76075251-76075751	TSS	Fstl5	Fstl5 chr3:76075251-76075751			Promoter	No
chr10:13500808-13501308	TSS	Fuca2	Fuca2 chr10:13500808-13501308	0.318475	3.33493e-12	Promoter	Yes
chr9:14750689-14751189	TSS	Fut4	Fut4 chr9:14750689-14751189			Other	Yes
chr9:14751373-14751873	TSS	Fut4	Fut4 chr9:14751373-14751873			PEs	Yes
chr9:14751913-14752413	TSS	Fut4	Fut4 chr9:14751913-14752413			PEs	Yes
chr7:31076914-31077414	TSS	Fxyd3	Fxyd3 chr7:31076914-31077414			AEs	No
chr7:31077467-31077967	TSS	Fxyd3	Fxyd3 chr7:31077467-31077967	0.376418	4.8381e-17	AEs	Yes
chr7:31050205-31050705	TSS	Fxyd7	Fxyd7 chr7:31050205-31050705			PEs	No
chr7:31050867-31051367	TSS	Fxyd7	Fxyd7 chr7:31050867-31051367			PEs	No
chr7:31052046-31052546	TSS	Fxyd7	Fxyd7 chr7:31052046-31052546			PEs	No
chr1:193272399-193272899	TSS	G0s2	G0s2 chr1:193272399-193272899			AEs	Yes
chr1:193273160-193273660	TSS	G0s2	G0s2 chr1:193273160-193273660			PEs	Yes
chr11:69990752-69991252	TSS	Gabarap	Gabarap chr11:69990752-69991252			Promoter	Yes
chr11:69991279-69991779	TSS	Gabarap	Gabarap chr11:69991279-69991779			Promoter	Yes
chr11:69991781-69992281	TSS	Gabarap	Gabarap chr11:69991781-69992281			Promoter	Yes
chr6:129532408-129532908	TSS	Gabarapl1	Gabarapl1 chr6:129532408-129532908			Promoter	Yes
chr6:129532915-129533415	TSS	Gabarapl1	Gabarapl1 chr6:129532915-129533415			Promoter	Yes
chr6:129533418-129533918	TSS	Gabarapl1	Gabarapl1 chr6:129533418-129533918			Promoter	Yes
chr6:129534028-129534528	TSS	Gabarapl1	Gabarapl1 chr6:129534028-129534528			Promoter	Yes
chr8:111939773-111940273	TSS	Gabarapl2	Gabarapl2 chr8:111939773-111940273	0.341053	5.7616e-14	Promoter	Yes
chr8:111940337-111940837	TSS	Gabarapl2	Gabarapl2 chr8:111940337-111940837	0.43578	3.71045e-23	Promoter	Yes
chr8:111941033-111941533	TSS	Gabarapl2	Gabarapl2 chr8:111941033-111941533			Promoter	Yes
chr11:42182042-42182542	TSS	Gabra1	Gabra1 chr11:42182042-42182542			PEs	Yes
chr11:42182685-42183185	TSS	Gabra1	Gabra1 chr11:42182685-42183185			PEs	Yes
chr5:115340423-115340923	TSS	Gatc	Gatc chr5:115340423-115340923			Promoter	Yes
chr5:115340957-115341457	TSS	Gatc	Gatc chr5:115340957-115341457			Promoter	Yes
chr10:58254639-58255139	TSS	Gcc2	Gcc2 chr10:58254639-58255139			PEs	No
chr10:58255219-58255719	TSS	Gcc2	Gcc2 chr10:58255219-58255719			Promoter	No
chr10:58255933-58256433	TSS	Gcc2	Gcc2 chr10:58255933-58256433			Promoter	No
chr10:128890663-128891163	TSS	Gdf11	Gdf11 chr10:128890663-128891163			Promoter	No
chr10:128891181-128891681	TSS	Gdf11	Gdf11 chr10:128891181-128891681			Promoter	No
chr10:128891698-128892198	TSS	Gdf11	Gdf11 chr10:128891698-128892198			Promoter	No
chr10:128892237-128892737	TSS	Gdf11	Gdf11 chr10:128892237-128892737			Promoter	No
chr7:122020182-122020682	TSS	Gga2	Gga2 chr7:122020182-122020682			Promoter	Yes
chr7:122020837-122021337	TSS	Gga2	Gga2 chr7:122020837-122021337			Promoter	Yes
chr13:14062697-14063197	TSS	Ggps1	Ggps1 chr13:14062697-14063197			Promoter	No
chr13:14063259-14063759	TSS	Ggps1	Ggps1 chr13:14063259-14063759			Promoter	Yes
chr13:14063828-14064328	TSS	Ggps1	Ggps1 chr13:14063828-14064328			Promoter	Yes
chr5:127632207-127632707	TSS	Glt1d1	Glt1d1 chr5:127632207-127632707			Promoter	No
chr3:108092487-108092987	TSS	Gnat2	Gnat2 chr3:108092487-108092987	0.633975	2.32584e-55	PEs	No
chr3:108093122-108093622	TSS	Gnat2	Gnat2 chr3:108093122-108093622	0.620211	2.47672e-52	PEs	Yes
chr3:108094043-108094543	TSS	Gnat2	Gnat2 chr3:108094043-108094543	0.666768	3.12294e-63	PEs	No
chr9:75306024-75306524	TSS	Gnb5	Gnb5 chr9:75306024-75306524			PEs	Yes
chr17:25716220-25716720	TSS	Gng13	Gng13 chr17:25716220-25716720			PEs	No
chr17:25716912-25717412	TSS	Gng13	Gng13 chr17:25716912-25717412			PEs	Yes
chr17:25717832-25718332	TSS	Gng13	Gng13 chr17:25717832-25718332			PEs	No
chr19:8837915-8838415	TSS	Gng3	Gng3 chr19:8837915-8838415			Promoter	No
chr19:8839109-8839609	TSS	Gng3	Gng3 chr19:8839109-8839609			Promoter	Yes
chr19:8840244-8840744	TSS	Gng3	Gng3 chr19:8840244-8840744			Promoter	Yes
chr18:38338117-38338617	TSS	Gnpda1	Gnpda1 chr18:38338117-38338617			Promoter	Yes
chr18:38338782-38339282	TSS	Gnpda1	Gnpda1 chr18:38338782-38339282			Promoter	Yes
chr14:45387901-45388401	TSS	Gnpnat1	Gnpnat1 chr14:45387901-45388401			Promoter	No
chr14:45388543-45389043	TSS	Gnpnat1	Gnpnat1 chr14:45388543-45389043	0.331896	3.11682e-13	Promoter	No
chr14:45389046-45389546	TSS	Gnpnat1	Gnpnat1 chr14:45389046-45389546			Promoter	No
chr2:32287351-32287851	TSS	Golga2	Golga2 chr2:32287351-32287851			Promoter	Yes
chr2:32287938-32288438	TSS	Golga2	Golga2 chr2:32287938-32288438			Promoter	Yes
chr2:32288482-32288982	TSS	Golga2	Golga2 chr2:32288482-32288982			Promoter	Yes
chr9:118505936-118506436	TSS	Golga4	Golga4 chr9:118505936-118506436	0.251921	7.60504e-08	Promoter	Yes
chr9:118506542-118507042	TSS	Golga4	Golga4 chr9:118506542-118507042			Promoter	Yes
chr8:23256019-23256519	TSS	Golga7	Golga7 chr8:23256019-23256519			Promoter	No
chr8:23256818-23257318	TSS	Golga7	Golga7 chr8:23256818-23257318			Promoter	Yes
chr8:23257401-23257901	TSS	Golga7	Golga7 chr8:23257401-23257901			Promoter	Yes
chr10:52380668-52381168	TSS	Gopc	Gopc chr10:52380668-52381168			Promoter	No
chr10:52381401-52381901	TSS	Gopc	Gopc chr10:52381401-52381901			Promoter	Yes
chr10:52381959-52382459	TSS	Gopc	Gopc chr10:52381959-52382459	-0.352025	7.05253e-15	Promoter	Yes
chr10:52382870-52383370	TSS	Gopc	Gopc chr10:52382870-52383370			PEs	Yes
chr14:76109942-76110442	TSS	Gpalpp1	Gpalpp1 chr14:76109942-76110442			Promoter	Yes
chr14:76110587-76111087	TSS	Gpalpp1	Gpalpp1 chr14:76110587-76111087			Promoter	Yes
chr14:76111503-76112003	TSS	Gpalpp1	Gpalpp1 chr14:76111503-76112003			Promoter	No
chr17:78834686-78835186	TSS	Gpatch11	Gpatch11 chr17:78834686-78835186			Promoter	No
chr17:78835306-78835806	TSS	Gpatch11	Gpatch11 chr17:78835306-78835806	-0.42404	7.6046e-22	Promoter	Yes
chr17:78836085-78836585	TSS	Gpatch11	Gpatch11 chr17:78836085-78836585			Promoter	No
chr1:187215227-187215727	TSS	Gpatch2	Gpatch2 chr1:187215227-187215727			Promoter	Yes
chr12:86241592-86242092	TSS	Gpatch2l	Gpatch2l chr12:86241592-86242092	-0.349367	1.18221e-14	Promoter	Yes
chr12:86242233-86242733	TSS	Gpatch2l	Gpatch2l chr12:86242233-86242733			Promoter	Yes
chr8:54779262-54779762	TSS	Gpm6a	Gpm6a chr8:54779262-54779762	0.542374	9.23064e-38	Promoter	Yes
chr8:54780318-54780818	TSS	Gpm6a	Gpm6a chr8:54780318-54780818	0.573834	3.54339e-43	Promoter	Yes
chr5:122371632-122372132	TSS	Gpn3	Gpn3 chr5:122371632-122372132			Promoter	No
chr5:122372247-122372747	TSS	Gpn3	Gpn3 chr5:122372247-122372747			Promoter	Yes
chr11:120783434-120783934	TSS	Gps1	Gps1 chr11:120783434-120783934			Promoter	No
chr11:120784015-120784515	TSS	Gps1	Gps1 chr11:120784015-120784515	-0.302279	4.9601e-11	Promoter	No
chr11:120784544-120785044	TSS	Gps1	Gps1 chr11:120784544-120785044			Promoter	No
chr11:120785192-120785692	TSS	Gps1	Gps1 chr11:120785192-120785692			Promoter	No
chr9:108338429-108338929	TSS	Gpx1	Gpx1 chr9:108338429-108338929			AEs	No
chr9:108338938-108339438	TSS	Gpx1	Gpx1 chr9:108338938-108339438			Promoter	Yes
chr9:108339600-108340100	TSS	Gpx1	Gpx1 chr9:108339600-108340100			Promoter	Yes
chr10:80045694-80046194	TSS	Gpx4	Gpx4 chr10:80045694-80046194	0.586143	1.83646e-45	AEs	No
chr10:80046759-80047259	TSS	Gpx4	Gpx4 chr10:80046759-80047259			AEs	No
chr10:80047282-80047782	TSS	Gpx4	Gpx4 chr10:80047282-80047782			AEs	No
chr11:115707813-115708313	TSS	Grb2	Grb2 chr11:115707813-115708313			Promoter	Yes
chr11:115708352-115708852	TSS	Grb2	Grb2 chr11:115708352-115708852	-0.263894	1.53112e-08	Promoter	No
chr11:115709005-115709505	TSS	Grb2	Grb2 chr11:115709005-115709505	-0.275558	2.95566e-09	Promoter	No
chr3:80801623-80802123	TSS	Gria2	Gria2 chr3:80801623-80802123			Promoter	Yes
chr3:80802486-80802986	TSS	Gria2	Gria2 chr3:80802486-80802986			Promoter	Yes
chr3:80803226-80803726	TSS	Gria2	Gria2 chr3:80803226-80803726			PEs	Yes
chr6:63255794-63256294	TSS	Grid2	Grid2 chr6:63255794-63256294			Promoter	Yes
chr6:63256374-63256874	TSS	Grid2	Grid2 chr6:63256374-63256874	0.361263	1.12531e-15	Promoter	No
chr6:63257281-63257781	TSS	Grid2	Grid2 chr6:63257281-63257781			Promoter	Yes
chr5:34659382-34659882	TSS	Grk4	Grk4 chr5:34659382-34659882			Promoter	No
chr5:34659968-34660468	TSS	Grk4	Grk4 chr5:34659968-34660468			Promoter	No
chr5:34660584-34661084	TSS	Grk4	Grk4 chr5:34660584-34661084			Promoter	No
chr8:13200247-13200747	TSS	Grtp1	Grtp1 chr8:13200247-13200747	0.402128	1.54901e-19	Promoter	Yes
chr8:13200876-13201376	TSS	Grtp1	Grtp1 chr8:13200876-13201376			Promoter	No
chr16:11253222-11253722	TSS	Gspt1	Gspt1 chr16:11253222-11253722			Promoter	Yes
chr16:11254124-11254624	TSS	Gspt1	Gspt1 chr16:11254124-11254624			Promoter	Yes
chr16:11254773-11255273	TSS	Gspt1	Gspt1 chr16:11254773-11255273			Promoter	Yes
chr3:107986246-107986746	TSS	Gstm2	Gstm2 chr3:107986246-107986746			Other	Yes
chr3:108044071-108044571	TSS	Gstm4	Gstm4 chr3:108044071-108044571			PEs	No
chr3:108044724-108045224	TSS	Gstm4	Gstm4 chr3:108044724-108045224			PEs	No
chr19:47853988-47854488	TSS	Gsto1	Gsto1 chr19:47853988-47854488			PEs	No
chr19:47854732-47855232	TSS	Gsto1	Gsto1 chr19:47854732-47855232			Promoter	Yes
chr19:47855359-47855859	TSS	Gsto1	Gsto1 chr19:47855359-47855859			Promoter	No
chr19:4037143-4037643	TSS	Gstp1	Gstp1 chr19:4037143-4037643			PEs	Yes
chr19:4037711-4038211	TSS	Gstp1	Gstp1 chr19:4037711-4038211			Promoter	Yes
chr9:70012313-70012813	TSS	Gtf2a2	Gtf2a2 chr9:70012313-70012813	-0.25254	7.01502e-08	Promoter	Yes
chr7:125706852-125707352	TSS	Gtf3c1	Gtf3c1 chr7:125706852-125707352			Promoter	No
chr7:125707577-125708077	TSS	Gtf3c1	Gtf3c1 chr7:125707577-125708077			Promoter	Yes
chr10:40256614-40257114	TSS	Gtf3c6	Gtf3c6 chr10:40256614-40257114			Promoter	No
chr10:40257462-40257962	TSS	Gtf3c6	Gtf3c6 chr10:40257462-40257962			Promoter	No
chr10:40258397-40258897	TSS	Gtf3c6	Gtf3c6 chr10:40258397-40258897	0.582295	9.75717e-45	Promoter	No
chr17:47400456-47400956	TSS	Guca1a	Guca1a chr17:47400456-47400956	0.766596	6.18456e-95	Other	Yes
chr16:35022080-35022580	TSS	Hacd2	Hacd2 chr16:35022080-35022580			Promoter	Yes
chr16:35022683-35023183	TSS	Hacd2	Hacd2 chr16:35022683-35023183			Promoter	Yes
chr8:106869978-106870478	TSS	Has3	Has3 chr8:106869978-106870478			PEs	No
chr8:106870582-106871082	TSS	Has3	Has3 chr8:106870582-106871082			PEs	Yes
chr8:106871150-106871650	TSS	Has3	Has3 chr8:106871150-106871650			PEs	No
chr3:89997712-89998212	TSS	Hax1	Hax1 chr3:89997712-89998212			Promoter	Yes
chr3:89998450-89998950	TSS	Hax1	Hax1 chr3:89998450-89998950			Promoter	Yes
chr3:89998955-89999455	TSS	Hax1	Hax1 chr3:89998955-89999455			Promoter	No
chr1:93477662-93478162	TSS	Hdlbp	Hdlbp chr1:93477662-93478162			Promoter	Yes
chr1:93478247-93478747	TSS	Hdlbp	Hdlbp chr1:93478247-93478747	-0.491755	3.57051e-30	Promoter	Yes
chr1:93478750-93479250	TSS	Hdlbp	Hdlbp chr1:93478750-93479250			Promoter	Yes
chr1:93479395-93479895	TSS	Hdlbp	Hdlbp chr1:93479395-93479895			Promoter	No
chr6:135167279-135167779	TSS	Hebp1	Hebp1 chr6:135167279-135167779	0.457299	1.06378e-25	Other	No
chr6:135167846-135168346	TSS	Hebp1	Hebp1 chr6:135167846-135168346	0.580002	2.61102e-44	Promoter	Yes
chr6:135168452-135168952	TSS	Hebp1	Hebp1 chr6:135168452-135168952			PEs	No
chr1:54194094-54194594	TSS	Hecw2	Hecw2 chr1:54194094-54194594			Promoter	No
chr1:54194910-54195410	TSS	Hecw2	Hecw2 chr1:54194910-54195410			Promoter	No
chr16:33683142-33683642	TSS	Heg1	Heg1 chr16:33683142-33683642			PEs	No
chr16:33684235-33684735	TSS	Heg1	Heg1 chr16:33684235-33684735			Promoter	No
chr16:33685120-33685620	TSS	Heg1	Heg1 chr16:33685120-33685620			Promoter	No
chr7:56049148-56049648	TSS	Herc2	Herc2 chr7:56049148-56049648			PEs	No
chr7:56049845-56050345	TSS	Herc2	Herc2 chr7:56049845-56050345	0.263109	1.70506e-08	Promoter	Yes
chr7:56050410-56050910	TSS	Herc2	Herc2 chr7:56050410-56050910			Promoter	Yes
chr15:76368009-76368509	TSS	Hgh1	Hgh1 chr15:76368009-76368509	-0.545577	2.7532e-38	AEs	No
chr15:76368572-76369072	TSS	Hgh1	Hgh1 chr15:76368572-76369072	-0.502402	1.15577e-31	Promoter	Yes
chr15:76369126-76369626	TSS	Hgh1	Hgh1 chr15:76369126-76369626	-0.318765	3.17213e-12	Promoter	Yes
chr9:44305406-44305906	TSS	Hinfp	Hinfp chr9:44305406-44305906			Promoter	Yes
chr3:103790549-103791049	TSS	Hipk1	Hipk1 chr3:103790549-103791049			Promoter	Yes
chr3:103791101-103791601	TSS	Hipk1	Hipk1 chr3:103791101-103791601			Promoter	No
chr6:38875482-38875982	TSS	Hipk2	Hipk2 chr6:38875482-38875982			Promoter	No
chr6:38876080-38876580	TSS	Hipk2	Hipk2 chr6:38876080-38876580			Promoter	No
chr6:38876601-38877101	TSS	Hipk2	Hipk2 chr6:38876601-38877101			Promoter	No
chr13:23683763-23684263	TSS	Hist1h2bc	Hist1h2bc chr13:23683763-23684263	0.255567	4.71078e-08	Promoter	Yes
chr13:23684609-23685109	TSS	Hist1h2bc	Hist1h2bc chr13:23684609-23685109			Promoter	Yes
chr3:20057008-20057508	TSS	Hltf	Hltf chr3:20057008-20057508			Promoter	No
chr3:20057514-20058014	TSS	Hltf	Hltf chr3:20057514-20058014			Promoter	Yes
chr3:20058059-20058559	TSS	Hltf	Hltf chr3:20058059-20058559			Promoter	Yes
chr13:58127494-58127994	TSS	Hnrnpa0	Hnrnpa0 chr13:58127494-58127994	-0.350416	9.64714e-15	Promoter	Yes
chr13:58128026-58128526	TSS	Hnrnpa0	Hnrnpa0 chr13:58128026-58128526	-0.392235	1.50302e-18	Promoter	Yes
chr13:58128724-58129224	TSS	Hnrnpa0	Hnrnpa0 chr13:58128724-58129224	-0.321705	1.90687e-12	Promoter	Yes
chr13:58129402-58129902	TSS	Hnrnpa0	Hnrnpa0 chr13:58129402-58129902	-0.286104	6.21853e-10	Promoter	No
chr15:103239279-103239779	TSS	Hnrnpa1	Hnrnpa1 chr15:103239279-103239779			Promoter	Yes
chr15:103240125-103240625	TSS	Hnrnpa1	Hnrnpa1 chr15:103240125-103240625	-0.466834	6.91975e-27	Promoter	Yes
chr15:103240668-103241168	TSS	Hnrnpa1	Hnrnpa1 chr15:103240668-103241168			Promoter	Yes
chr8:26118318-26118818	TSS	Hook3	Hook3 chr8:26118318-26118818	0.310957	1.19253e-11	Promoter	Yes
chr8:26119252-26119752	TSS	Hook3	Hook3 chr8:26119252-26119752	0.564316	1.7824e-41	Promoter	Yes
chr4:138215389-138215889	TSS	Hp1bp3	Hp1bp3 chr4:138215389-138215889			Promoter	No
chr4:138216080-138216580	TSS	Hp1bp3	Hp1bp3 chr4:138216080-138216580			Promoter	No
chr4:138216877-138217377	TSS	Hp1bp3	Hp1bp3 chr4:138216877-138217377			Promoter	No
chr4:138217423-138217923	TSS	Hp1bp3	Hp1bp3 chr4:138217423-138217923			Promoter	No
chr4:129120838-129121338	TSS	Hpca	Hpca chr4:129120838-129121338			Promoter	Yes
chr4:129121477-129121977	TSS	Hpca	Hpca chr4:129121477-129121977			PEs	Yes
chr4:129122107-129122607	TSS	Hpca	Hpca chr4:129122107-129122607			PEs	No
chr4:129122625-129123125	TSS	Hpca	Hpca chr4:129122625-129123125			PEs	Yes
chr12:17690021-17690521	TSS	Hpcal1	Hpcal1 chr12:17690021-17690521			Other	Yes
chr12:17690563-17691063	TSS	Hpcal1	Hpcal1 chr12:17690563-17691063			Promoter	Yes
chr12:17691175-17691675	TSS	Hpcal1	Hpcal1 chr12:17691175-17691675			Promoter	Yes
chr12:17691772-17692272	TSS	Hpcal1	Hpcal1 chr12:17691772-17692272			Promoter	No
chr16:29209913-29210413	TSS	Hrasls	Hrasls chr16:29209913-29210413	0.268006	8.65186e-09	PEs	Yes
chr11:63921383-63921883	TSS	Hs3st3b1	Hs3st3b1 chr11:63921383-63921883	0.435943	3.55523e-23	Promoter	Yes
chr11:63922108-63922608	TSS	Hs3st3b1	Hs3st3b1 chr11:63922108-63922608	0.548953	7.5961e-39	Promoter	Yes
chr15:76477146-76477646	TSS	Hsf1	Hsf1 chr15:76477146-76477646			Promoter	Yes
chr15:76477878-76478378	TSS	Hsf1	Hsf1 chr15:76477878-76478378			Promoter	No
chr10:57485991-57486491	TSS	Hsf2	Hsf2 chr10:57485991-57486491			Promoter	No
chr10:57487155-57487655	TSS	Hsf2	Hsf2 chr10:57487155-57487655			Promoter	No
chr17:34971915-34972415	TSS	Hspa1a	Hspa1a chr17:34971915-34972415			Promoter	No
chr17:34972419-34972919	TSS	Hspa1a	Hspa1a chr17:34972419-34972919			Promoter	Yes
chr17:34958868-34959368	TSS	Hspa1b	Hspa1b chr17:34958868-34959368			PEs	No
chr17:34959425-34959925	TSS	Hspa1b	Hspa1b chr17:34959425-34959925			Promoter	Yes
chr12:21316112-21316612	TSS	Iah1	Iah1 chr12:21316112-21316612			Promoter	No
chr13:49681313-49681813	TSS	Iars	Iars chr13:49681313-49681813			Promoter	No
chr13:49681826-49682326	TSS	Iars	Iars chr13:49681826-49682326			Promoter	No
chr13:49682358-49682858	TSS	Iars	Iars chr13:49682358-49682858			Promoter	No
chr13:70637115-70637615	TSS	Ice1	Ice1 chr13:70637115-70637615			Promoter	Yes
chr13:70637885-70638385	TSS	Ice1	Ice1 chr13:70637885-70638385			Promoter	No
chr9:78108109-78108609	TSS	Ick	Ick chr9:78108109-78108609	-0.362775	8.28382e-16	Promoter	No
chr9:78108846-78109346	TSS	Ick	Ick chr9:78108846-78109346	-0.252047	7.481e-08	Promoter	No
chr9:78109625-78110125	TSS	Ick	Ick chr9:78109625-78110125			PEs	No
chr2:163016941-163017441	TSS	Ift52	Ift52 chr2:163016941-163017441			Promoter	No
chr5:77407501-77408001	TSS	Igfbp7	Igfbp7 chr5:77407501-77408001			PEs	Yes
chr4:45825730-45826230	TSS	Igfbpl1	Igfbpl1 chr4:45825730-45826230			Other	Yes
chr4:45826638-45827138	TSS	Igfbpl1	Igfbpl1 chr4:45826638-45827138			Other	No
chr4:140246181-140246681	TSS	Igsf21	Igsf21 chr4:140246181-140246681			Promoter	Yes
chr4:140246698-140247198	TSS	Igsf21	Igsf21 chr4:140246698-140247198	0.600915	2.43496e-48	Promoter	No
chr1:172481185-172481685	TSS	Igsf9	Igsf9 chr1:172481185-172481685			Promoter	No
chr1:172481888-172482388	TSS	Igsf9	Igsf9 chr1:172481888-172482388			Promoter	Yes
chr1:172482797-172483297	TSS	Igsf9	Igsf9 chr1:172482797-172483297			Promoter	Yes
chr13:112463151-112463651	TSS	Il6st	Il6st chr13:112463151-112463651			Promoter	Yes
chr13:112463852-112464352	TSS	Il6st	Il6st chr13:112463852-112464352			Promoter	Yes
chr13:112464530-112465030	TSS	Il6st	Il6st chr13:112464530-112465030			Promoter	No
chr18:12971946-12972446	TSS	Impact	Impact chr18:12971946-12972446			Other	No
chr18:12973090-12973590	TSS	Impact	Impact chr18:12973090-12973590			Promoter	No
chr9:80465247-80465747	TSS	Impg1	Impg1 chr9:80465247-80465747	0.687042	1.26809e-68	PEs	Yes
chr19:47013821-47014321	TSS	Ina	Ina chr19:47013821-47014321			Promoter	No
chr19:47014410-47014910	TSS	Ina	Ina chr19:47014410-47014910			Promoter	Yes
chr19:47014984-47015484	TSS	Ina	Ina chr19:47014984-47015484			Promoter	Yes
chr19:47015634-47016134	TSS	Ina	Ina chr19:47015634-47016134			Promoter	Yes
chr1:119420933-119421433	TSS	Inhbb	Inhbb chr1:119420933-119421433			Promoter	No
chr1:119421556-119422056	TSS	Inhbb	Inhbb chr1:119421556-119422056			Promoter	No
chr1:119422160-119422660	TSS	Inhbb	Inhbb chr1:119422160-119422660	0.650236	3.87128e-59	Promoter	Yes
chr1:119422680-119423180	TSS	Inhbb	Inhbb chr1:119422680-119423180	0.450258	7.57512e-25	Promoter	Yes
chr2:119476413-119476913	TSS	Ino80	Ino80 chr2:119476413-119476913			Promoter	No
chr2:119477038-119477538	TSS	Ino80	Ino80 chr2:119477038-119477538			Promoter	No
chr2:119477716-119478216	TSS	Ino80	Ino80 chr2:119477716-119478216			Promoter	No
chr18:24121038-24121538	TSS	Ino80c	Ino80c chr18:24121038-24121538			Promoter	No
chr18:24121638-24122138	TSS	Ino80c	Ino80c chr18:24121638-24122138	0.481027	1.00312e-28	Promoter	Yes
chr8:81341453-81341953	TSS	Inpp4b	Inpp4b chr8:81341453-81341953	0.49362	1.97665e-30	Promoter	No
chr8:81342181-81342681	TSS	Inpp4b	Inpp4b chr8:81342181-81342681	0.581105	1.62722e-44	Promoter	Yes
chr8:81342683-81343183	TSS	Inpp4b	Inpp4b chr8:81342683-81343183			Promoter	Yes
chr8:81343296-81343796	TSS	Inpp4b	Inpp4b chr8:81343296-81343796			PEs	Yes
chr7:128610994-128611494	TSS	Inpp5f	Inpp5f chr7:128610994-128611494			Promoter	No
chr7:128611519-128612019	TSS	Inpp5f	Inpp5f chr7:128611519-128612019			Promoter	No
chr9:54862963-54863463	TSS	Ireb2	Ireb2 chr9:54862963-54863463			Promoter	No
chr9:54863479-54863979	TSS	Ireb2	Ireb2 chr9:54863479-54863979			Promoter	Yes
chr9:54864036-54864536	TSS	Ireb2	Ireb2 chr9:54864036-54864536			Promoter	No
chr8:92673408-92673908	TSS	Irx6	Irx6 chr8:92673408-92673908	0.338318	9.60006e-14	PEs	Yes
chr8:92674381-92674881	TSS	Irx6	Irx6 chr8:92674381-92674881			Promoter	Yes
chr13:59768552-59769052	TSS	Isca1	Isca1 chr13:59768552-59769052			Promoter	No
chr13:59769087-59769587	TSS	Isca1	Isca1 chr13:59769087-59769587	0.36205	9.59636e-16	Promoter	No
chr13:59769669-59770169	TSS	Isca1	Isca1 chr13:59769669-59770169	0.523165	9.9721e-35	Promoter	Yes
chr13:59770416-59770916	TSS	Isca1	Isca1 chr13:59770416-59770916	-0.298393	9.24362e-11	Promoter	No
chr5:113771665-113772165	TSS	Iscu	Iscu chr5:113771665-113772165			Promoter	Yes
chr5:113772447-113772947	TSS	Iscu	Iscu chr5:113772447-113772947			Promoter	Yes
chr5:113773003-113773503	TSS	Iscu	Iscu chr5:113773003-113773503			Promoter	No
chr5:113773566-113774066	TSS	Iscu	Iscu chr5:113773566-113774066			Promoter	No
chr9:55540255-55540755	TSS	Isl2	Isl2 chr9:55540255-55540755			Promoter	Yes
chr9:55540776-55541276	TSS	Isl2	Isl2 chr9:55540776-55541276	0.510383	8.12276e-33	Promoter	Yes
chr9:55541542-55542042	TSS	Isl2	Isl2 chr9:55541542-55542042			Promoter	No
chr2:139676869-139677369	TSS	Ism1	Ism1 chr2:139676869-139677369			Promoter	Yes
chr2:139677900-139678400	TSS	Ism1	Ism1 chr2:139677900-139678400			Promoter	Yes
chr2:139678468-139678968	TSS	Ism1	Ism1 chr2:139678468-139678968			Promoter	Yes
chr2:10153178-10153678	TSS	Itih5	Itih5 chr2:10153178-10153678			PEs	No
chr2:10153811-10154311	TSS	Itih5	Itih5 chr2:10153811-10154311			PEs	No
chr1:85894316-85894816	TSS	Itm2c	Itm2c chr1:85894316-85894816			Promoter	No
chr1:85895280-85895780	TSS	Itm2c	Itm2c chr1:85895280-85895780	0.305133	3.12104e-11	Promoter	No
chr7:27227823-27228323	TSS	Itpkc	Itpkc chr7:27227823-27228323			Promoter	Yes
chr7:27228408-27228908	TSS	Itpkc	Itpkc chr7:27228408-27228908			Promoter	Yes
chr7:27228924-27229424	TSS	Itpkc	Itpkc chr7:27228924-27229424			Promoter	No
chr16:91728432-91728932	TSS	Itsn1	Itsn1 chr16:91728432-91728932			Promoter	Yes
chr16:91729138-91729638	TSS	Itsn1	Itsn1 chr16:91729138-91729638			Promoter	Yes
chr16:91729793-91730293	TSS	Itsn1	Itsn1 chr16:91729793-91730293			Promoter	No
chr2:137115338-137115838	TSS	Jag1	Jag1 chr2:137115338-137115838			Promoter	Yes
chr2:137115953-137116453	TSS	Jag1	Jag1 chr2:137115953-137116453			Promoter	Yes
chr2:137116487-137116987	TSS	Jag1	Jag1 chr2:137116487-137116987	0.686554	1.73158e-68	Promoter	Yes
chr2:137117268-137117768	TSS	Jag1	Jag1 chr2:137117268-137117768			Promoter	Yes
chr10:67096072-67096572	TSS	Jmjd1c	Jmjd1c chr10:67096072-67096572	0.258539	3.1698e-08	Promoter	Yes
chr10:67096788-67097288	TSS	Jmjd1c	Jmjd1c chr10:67096788-67097288	0.259519	2.77757e-08	Promoter	Yes
chr16:34513819-34514319	TSS	Kalrn	Kalrn chr16:34513819-34514319			PEs	No
chr15:98532840-98533340	TSS	Kansl2	Kansl2 chr15:98532840-98533340			Promoter	No
chr15:98533462-98533962	TSS	Kansl2	Kansl2 chr15:98533462-98533962			Promoter	Yes
chr15:98534103-98534603	TSS	Kansl2	Kansl2 chr15:98534103-98534603			Promoter	Yes
chr8:22858338-22858838	TSS	Kat6a	Kat6a chr8:22858338-22858838			Promoter	No
chr8:22858961-22859461	TSS	Kat6a	Kat6a chr8:22858961-22859461			Promoter	No
chr8:22859906-22860406	TSS	Kat6a	Kat6a chr8:22859906-22860406			Promoter	No
chr14:21498539-21499039	TSS	Kat6b	Kat6b chr14:21498539-21499039			Promoter	Yes
chr14:21499079-21499579	TSS	Kat6b	Kat6b chr14:21499079-21499579			Promoter	Yes
chr14:21499643-21500143	TSS	Kat6b	Kat6b chr14:21499643-21500143			Promoter	Yes
chr14:21500262-21500762	TSS	Kat6b	Kat6b chr14:21500262-21500762			Promoter	Yes
chr5:148927891-148928391	TSS	Katnal1	Katnal1 chr5:148927891-148928391			Promoter	No
chr5:148928466-148928966	TSS	Katnal1	Katnal1 chr5:148928466-148928966	-0.253864	5.89715e-08	Promoter	Yes
chr5:148929037-148929537	TSS	Katnal1	Katnal1 chr5:148929037-148929537			Promoter	No
chr4:142238454-142238954	TSS	Kazn	Kazn chr4:142238454-142238954			Promoter	Yes
chr4:142239199-142239699	TSS	Kazn	Kazn chr4:142239199-142239699			Promoter	No
chr3:107035400-107035900	TSS	Kcna3	Kcna3 chr3:107035400-107035900			Promoter	Yes
chr3:107035927-107036427	TSS	Kcna3	Kcna3 chr3:107035927-107036427			Promoter	No
chr3:107036431-107036931	TSS	Kcna3	Kcna3 chr3:107036431-107036931			Promoter	No
chr2:167188634-167189134	TSS	Kcnb1	Kcnb1 chr2:167188634-167189134	0.89437	7.51542e-172	Promoter	Yes
chr2:167189298-167189798	TSS	Kcnb1	Kcnb1 chr2:167189298-167189798	0.763262	1.25297e-93	Promoter	No
chr2:167189999-167190499	TSS	Kcnb1	Kcnb1 chr2:167189999-167190499	0.741432	1.44427e-85	Promoter	Yes
chr2:167190579-167191079	TSS	Kcnb1	Kcnb1 chr2:167190579-167191079			PEs	No
chr2:63183443-63183943	TSS	Kcnh7	Kcnh7 chr2:63183443-63183943			Promoter	Yes
chr2:63183949-63184449	TSS	Kcnh7	Kcnh7 chr2:63183949-63184449			Promoter	Yes
chr2:63184479-63184979	TSS	Kcnh7	Kcnh7 chr2:63184479-63184979			Promoter	Yes
chr19:45815405-45815905	TSS	Kcnip2	Kcnip2 chr19:45815405-45815905			Promoter	Yes
chr19:45816106-45816606	TSS	Kcnip2	Kcnip2 chr19:45816106-45816606			Promoter	Yes
chr15:78428356-78428856	TSS	Kctd17	Kctd17 chr15:78428356-78428856			Promoter	Yes
chr15:78428947-78429447	TSS	Kctd17	Kctd17 chr15:78428947-78429447			Promoter	Yes
chr17:56325501-56326001	TSS	Kdm4b	Kdm4b chr17:56325501-56326001	-0.288229	4.50219e-10	Promoter	Yes
chr17:56326049-56326549	TSS	Kdm4b	Kdm4b chr17:56326049-56326549			Promoter	Yes
chr17:56326632-56327132	TSS	Kdm4b	Kdm4b chr17:56326632-56327132			Promoter	No
chr15:68927610-68928110	TSS	Khdrbs3	Khdrbs3 chr15:68927610-68928110	0.536481	8.25548e-37	Promoter	Yes
chr15:68928155-68928655	TSS	Khdrbs3	Khdrbs3 chr15:68928155-68928655			Promoter	No
chr15:68929053-68929553	TSS	Khdrbs3	Khdrbs3 chr15:68929053-68929553	0.344852	2.81001e-14	Promoter	Yes
chr17:57030852-57031352	TSS	Khsrp	Khsrp chr17:57030852-57031352			Promoter	Yes
chr17:57031401-57031901	TSS	Khsrp	Khsrp chr17:57031401-57031901	0.288242	4.49338e-10	Promoter	No
chr17:57031913-57032413	TSS	Khsrp	Khsrp chr17:57031913-57032413			Promoter	No
chr12:24974736-24975236	TSS	Kidins220	Kidins220 chr12:24974736-24975236			Promoter	Yes
chr12:24975375-24975875	TSS	Kidins220	Kidins220 chr12:24975375-24975875			Promoter	Yes
chr13:107021616-107022116	TSS	Kif2a	Kif2a chr13:107021616-107022116			Promoter	No
chr13:107022439-107022939	TSS	Kif2a	Kif2a chr13:107022439-107022939			Promoter	No
chr13:107022981-107023481	TSS	Kif2a	Kif2a chr13:107022981-107023481			Promoter	No
chr9:110476067-110476567	TSS	Kif9	Kif9 chr9:110476067-110476567			Promoter	Yes
chr9:110476733-110477233	TSS	Kif9	Kif9 chr9:110476733-110477233			Promoter	Yes
chr1:163779369-163779869	TSS	Kifap3	Kifap3 chr1:163779369-163779869			Promoter	No
chr1:163780083-163780583	TSS	Kifap3	Kifap3 chr1:163780083-163780583			Promoter	No
chr15:76659288-76659788	TSS	Kifc2	Kifc2 chr15:76659288-76659788			Promoter	No
chr15:76659904-76660404	TSS	Kifc2	Kifc2 chr15:76659904-76660404	0.252158	7.37462e-08	Promoter	No
chr15:76660451-76660951	TSS	Kifc2	Kifc2 chr15:76660451-76660951			Promoter	No
chr5:75574181-75574681	TSS	Kit	Kit chr5:75574181-75574681			Promoter	Yes
chr5:75574734-75575234	TSS	Kit	Kit chr5:75574734-75575234	0.257269	3.75647e-08	Promoter	Yes
chr5:75575596-75576096	TSS	Kit	Kit chr5:75575596-75576096	0.399991	2.54797e-19	Promoter	Yes
chr12:111757932-111758432	TSS	Klc1	Klc1 chr12:111757932-111758432			Promoter	No
chr12:111758676-111759176	TSS	Klc1	Klc1 chr12:111758676-111759176			Promoter	No
chr12:111759592-111760092	TSS	Klc1	Klc1 chr12:111759592-111760092			Promoter	No
chr10:80576268-80576768	TSS	Klf16	Klf16 chr10:80576268-80576768			Promoter	No
chr10:80577044-80577544	TSS	Klf16	Klf16 chr10:80577044-80577544			Promoter	Yes
chr10:80577579-80578079	TSS	Klf16	Klf16 chr10:80577579-80578079			Promoter	Yes
chr17:46680057-46680557	TSS	Klhdc3	Klhdc3 chr17:46680057-46680557			Promoter	Yes
chr17:46680788-46681288	TSS	Klhdc3	Klhdc3 chr17:46680788-46681288	0.334153	2.06663e-13	Promoter	Yes
chr17:46681365-46681865	TSS	Klhdc3	Klhdc3 chr17:46681365-46681865			Promoter	Yes
chr9:110475262-110475762	TSS	Klhl18	Klhl18 chr9:110475262-110475762			Promoter	Yes
chr9:110476067-110476567	TSS	Klhl18	Klhl18 chr9:110476067-110476567			Promoter	Yes
chr9:110476733-110477233	TSS	Klhl18	Klhl18 chr9:110476733-110477233			Promoter	Yes
chr7:99465027-99465527	TSS	Klhl35	Klhl35 chr7:99465027-99465527			Other	No
chr7:99465723-99466223	TSS	Klhl35	Klhl35 chr7:99465723-99466223			PEs	Yes
chr7:99466295-99466795	TSS	Klhl35	Klhl35 chr7:99466295-99466795			PEs	Yes
chr8:119861904-119862404	TSS	Klhl36	Klhl36 chr8:119861904-119862404			Promoter	No
chr8:119862433-119862933	TSS	Klhl36	Klhl36 chr8:119862433-119862933			Promoter	Yes
chrX:114473976-114474476	TSS	Klhl4	Klhl4 chrX:114473976-114474476	0.356618	2.85411e-15	Promoter	Yes
chr9:44880243-44880743	TSS	Kmt2a	Kmt2a chr9:44880243-44880743			Promoter	No
chr9:44880783-44881283	TSS	Kmt2a	Kmt2a chr9:44880783-44881283			Promoter	No
chr9:44881484-44881984	TSS	Kmt2a	Kmt2a chr9:44881484-44881984	-0.33481	1.83259e-13	Promoter	Yes
chr9:44882007-44882507	TSS	Kmt2a	Kmt2a chr9:44882007-44882507			Promoter	Yes
chr5:25497295-25497795	TSS	Kmt2c	Kmt2c chr5:25497295-25497795			Promoter	No
chr5:25497908-25498408	TSS	Kmt2c	Kmt2c chr5:25497908-25498408			Promoter	No
chr5:25499007-25499507	TSS	Kmt2c	Kmt2c chr5:25499007-25499507			Promoter	No
chr5:25499594-25500094	TSS	Kmt2c	Kmt2c chr5:25499594-25500094	0.622401	8.38454e-53	Promoter	No
chr3:69125694-69126194	TSS	Kpna4	Kpna4 chr3:69125694-69126194			Promoter	Yes
chr3:69126369-69126869	TSS	Kpna4	Kpna4 chr3:69126369-69126869			Promoter	Yes
chr3:69126945-69127445	TSS	Kpna4	Kpna4 chr3:69126945-69127445			Promoter	Yes
chr3:69127698-69128198	TSS	Kpna4	Kpna4 chr3:69127698-69128198			Promoter	No
chr7:16119629-16120129	TSS	Kptn	Kptn chr7:16119629-16120129			Promoter	No
chr6:71270684-71271184	TSS	Krcc1	Krcc1 chr6:71270684-71271184			Promoter	No
chr6:71271257-71271757	TSS	Krcc1	Krcc1 chr6:71271257-71271757			Promoter	No
chr6:71271933-71272433	TSS	Krcc1	Krcc1 chr6:71271933-71272433			Promoter	No
chr6:71272466-71272966	TSS	Krcc1	Krcc1 chr6:71272466-71272966			Promoter	No
chr10:111972499-111972999	TSS	Krr1	Krr1 chr10:111972499-111972999			Promoter	Yes
chr14:47648077-47648577	TSS	Ktn1	Ktn1 chr14:47648077-47648577			PEs	No
chr14:47649033-47649533	TSS	Ktn1	Ktn1 chr14:47649033-47649533	0.40767	4.19148e-20	Promoter	No
chr14:47649553-47650053	TSS	Ktn1	Ktn1 chr14:47649553-47650053	0.372986	1.00213e-16	Promoter	No
chr14:47650215-47650715	TSS	Ktn1	Ktn1 chr14:47650215-47650715			Promoter	No
chr1:135817983-135818483	TSS	Lad1	Lad1 chr1:135817983-135818483			PEs	No
chr1:135818620-135819120	TSS	Lad1	Lad1 chr1:135818620-135819120			PEs	Yes
chr3:137917065-137917565	TSS	Lamtor3	Lamtor3 chr3:137917065-137917565			PEs	No
chr3:137917612-137918112	TSS	Lamtor3	Lamtor3 chr3:137917612-137918112			PEs	No
chr3:137918323-137918823	TSS	Lamtor3	Lamtor3 chr3:137918323-137918823			Promoter	Yes
chr3:137918892-137919392	TSS	Lamtor3	Lamtor3 chr3:137918892-137919392			Promoter	Yes
chr3:137919446-137919946	TSS	Lamtor3	Lamtor3 chr3:137919446-137919946			PEs	No
chr5:138254822-138255322	TSS	Lamtor4	Lamtor4 chr5:138254822-138255322			Promoter	No
chr5:138255465-138255965	TSS	Lamtor4	Lamtor4 chr5:138255465-138255965	0.407974	3.89913e-20	Promoter	Yes
chr11:58008435-58008935	TSS	Larp1	Larp1 chr11:58008435-58008935			Promoter	No
chr11:58009008-58009508	TSS	Larp1	Larp1 chr11:58009008-58009508			Promoter	No
chr11:58009711-58010211	TSS	Larp1	Larp1 chr11:58009711-58010211	-0.28993	3.47072e-10	Promoter	No
chr3:40949388-40949888	TSS	Larp1b	Larp1b chr3:40949388-40949888	-0.361667	1.03704e-15	Promoter	No
chr3:40949894-40950394	TSS	Larp1b	Larp1b chr3:40949894-40950394			Promoter	Yes
chr3:40950479-40950979	TSS	Larp1b	Larp1b chr3:40950479-40950979			Promoter	No
chr3:40951257-40951757	TSS	Larp1b	Larp1b chr3:40951257-40951757			Promoter	No
chr18:42260740-42261240	TSS	Lars	Lars chr18:42260740-42261240			PEs	No
chr18:42261340-42261840	TSS	Lars	Lars chr18:42261340-42261840			Promoter	No
chr18:42261944-42262444	TSS	Lars	Lars chr18:42261944-42262444			Promoter	Yes
chr7:126369676-126370176	TSS	Lat	Lat chr7:126369676-126370176			Other	No
chr9:83440374-83440874	TSS	Lca5	Lca5 chr9:83440374-83440874			Promoter	Yes
chr9:83440918-83441418	TSS	Lca5	Lca5 chr9:83440918-83441418			Promoter	Yes
chr19:41482365-41482865	TSS	Lcor	Lcor chr19:41482365-41482865			Promoter	No
chr19:41482960-41483460	TSS	Lcor	Lcor chr19:41482960-41483460			Promoter	No
chrX:61709527-61710027	TSS	Ldoc1	Ldoc1 chrX:61709527-61710027			PEs	Yes
chr3:65666065-65666565	TSS	Lekr1	Lekr1 chr3:65666065-65666565			Promoter	Yes
chr7:4136733-4137233	TSS	Leng8	Leng8 chr7:4136733-4137233	0.295837	1.38565e-10	Promoter	Yes
chr7:4137857-4138357	TSS	Leng8	Leng8 chr7:4137857-4138357			Promoter	No
chr8:34145869-34146369	TSS	Leprotl1	Leprotl1 chr8:34145869-34146369			Promoter	No
chr8:34146407-34146907	TSS	Leprotl1	Leprotl1 chr8:34146407-34146907			Promoter	Yes
chr8:34147009-34147509	TSS	Leprotl1	Leprotl1 chr8:34147009-34147509			Promoter	No
chr11:84524786-84525286	TSS	Lhx1	Lhx1 chr11:84524786-84525286			PEs	Yes
chr11:84525325-84525825	TSS	Lhx1	Lhx1 chr11:84525325-84525825			PEs	Yes
chr2:26207435-26207935	TSS	Lhx3	Lhx3 chr2:26207435-26207935	0.338558	9.17996e-14	PEs	Yes
chr2:26208043-26208543	TSS	Lhx3	Lhx3 chr2:26208043-26208543			PEs	Yes
chr15:99874517-99875017	TSS	Lima1	Lima1 chr15:99874517-99875017			Promoter	No
chr15:99875312-99875812	TSS	Lima1	Lima1 chr15:99875312-99875812			Promoter	Yes
chr7:45369646-45370146	TSS	Lin7b	Lin7b chr7:45369646-45370146			Other	Yes
chr7:45370464-45370964	TSS	Lin7b	Lin7b chr7:45370464-45370964			Promoter	Yes
chr2:109889992-109890492	TSS	Lin7c	Lin7c chr2:109889992-109890492			Other	No
chr2:109890565-109891065	TSS	Lin7c	Lin7c chr2:109890565-109891065			Promoter	Yes
chr2:109891503-109892003	TSS	Lin7c	Lin7c chr2:109891503-109892003			Promoter	Yes
chr10:80843218-80843718	TSS	Lingo3	Lingo3 chr10:80843218-80843718	0.357893	2.21361e-15	Promoter	No
chr10:80843837-80844337	TSS	Lingo3	Lingo3 chr10:80843837-80844337	0.412739	1.24e-20	Promoter	Yes
chr10:80844350-80844850	TSS	Lingo3	Lingo3 chr10:80844350-80844850			PEs	No
chr9:57619772-57620272	TSS	Lman1l	Lman1l chr9:57619772-57620272			Other	No
chr9:57620650-57621150	TSS	Lman1l	Lman1l chr9:57620650-57621150			Other	Yes
chr5:29377618-29378118	TSS	Lmbr1	Lmbr1 chr5:29377618-29378118			Promoter	No
chr5:29378166-29378666	TSS	Lmbr1	Lmbr1 chr5:29378166-29378666	-0.414609	7.86843e-21	Promoter	No
chr5:29378704-29379204	TSS	Lmbr1	Lmbr1 chr5:29378704-29379204			Promoter	No
chr3:144204652-144205152	TSS	Lmo4	Lmo4 chr3:144204652-144205152	0.4947	1.40072e-30	Promoter	Yes
chr3:144205376-144205876	TSS	Lmo4	Lmo4 chr3:144205376-144205876	0.250875	8.7127e-08	Promoter	No
chr3:144205886-144206386	TSS	Lmo4	Lmo4 chr3:144205886-144206386			Promoter	No
chr17:17623048-17623548	TSS	Lnpep	Lnpep chr17:17623048-17623548			Promoter	No
chr17:17623756-17624256	TSS	Lnpep	Lnpep chr17:17623756-17624256			Promoter	No
chr17:17624456-17624956	TSS	Lnpep	Lnpep chr17:17624456-17624956			Promoter	No
chr17:17625172-17625672	TSS	Lnpep	Lnpep chr17:17625172-17625672			Promoter	Yes
chr5:74703572-74704072	TSS	Lnx1	Lnx1 chr5:74703572-74704072			PEs	No
chr9:58312117-58312617	TSS	Loxl1	Loxl1 chr9:58312117-58312617			Other	Yes
chr9:58313023-58313523	TSS	Loxl1	Loxl1 chr9:58313023-58313523			PEs	Yes
chr1:191717652-191718152	TSS	Lpgat1	Lpgat1 chr1:191717652-191718152	0.425572	5.16631e-22	Promoter	Yes
chr1:191718180-191718680	TSS	Lpgat1	Lpgat1 chr1:191718180-191718680	0.486792	1.69676e-29	Promoter	Yes
chr1:191718901-191719401	TSS	Lpgat1	Lpgat1 chr1:191718901-191719401			Promoter	Yes
chr17:71182420-71182920	TSS	Lpin2	Lpin2 chr17:71182420-71182920			PEs	No
chr17:71183136-71183636	TSS	Lpin2	Lpin2 chr17:71183136-71183636			Promoter	No
chr10:127619955-127620455	TSS	Lrp1	Lrp1 chr10:127619955-127620455	0.346515	2.04677e-14	Promoter	Yes
chr10:127620682-127621182	TSS	Lrp1	Lrp1 chr10:127620682-127621182	0.447264	1.72107e-24	Promoter	Yes
chr10:127621534-127622034	TSS	Lrp1	Lrp1 chr10:127621534-127622034	0.487964	1.17736e-29	Promoter	Yes
chr10:127622040-127622540	TSS	Lrp1	Lrp1 chr10:127622040-127622540			Promoter	No
chr2:69585097-69585597	TSS	Lrp2	Lrp2 chr2:69585097-69585597			Promoter	Yes
chr2:69585889-69586389	TSS	Lrp2	Lrp2 chr2:69585889-69586389	0.324566	1.15462e-12	Promoter	Yes
chr2:69586689-69587189	TSS	Lrp2	Lrp2 chr2:69586689-69587189			Promoter	Yes
chr2:91457235-91457735	TSS	Lrp4	Lrp4 chr2:91457235-91457735	0.51079	7.08269e-33	Promoter	Yes
chr2:91458106-91458606	TSS	Lrp4	Lrp4 chr2:91458106-91458606			Promoter	Yes
chr4:107801276-107801776	TSS	Lrp8	Lrp8 chr4:107801276-107801776			Promoter	Yes
chr4:107801777-107802277	TSS	Lrp8	Lrp8 chr4:107801777-107802277	-0.364158	6.25161e-16	Promoter	No
chr4:107802645-107803145	TSS	Lrp8	Lrp8 chr4:107802645-107803145			Promoter	Yes
chr5:35104198-35104698	TSS	Lrpap1	Lrpap1 chr5:35104198-35104698			PEs	No
chr5:35105445-35105945	TSS	Lrpap1	Lrpap1 chr5:35105445-35105945			Promoter	Yes
chr5:35106153-35106653	TSS	Lrpap1	Lrpap1 chr5:35106153-35106653			Other	No
chr17:84790103-84790603	TSS	Lrpprc	Lrpprc chr17:84790103-84790603			Promoter	Yes
chr17:84790677-84791177	TSS	Lrpprc	Lrpprc chr17:84790677-84791177	0.406922	5.00965e-20	Promoter	Yes
chr17:84791678-84792178	TSS	Lrpprc	Lrpprc chr17:84791678-84792178			Promoter	No
chr3:30647657-30648157	TSS	Lrrc34	Lrrc34 chr3:30647657-30648157	0.461327	3.38994e-26	PEs	No
chr14:15438339-15438839	TSS	Lrrc3b	Lrrc3b chr14:15438339-15438839			PEs	Yes
chr14:15438840-15439340	TSS	Lrrc3b	Lrrc3b chr14:15438840-15439340			PEs	Yes
chr4:116074082-116074582	TSS	Lrrc41	Lrrc41 chr4:116074082-116074582			Promoter	Yes
chr4:116074839-116075339	TSS	Lrrc41	Lrrc41 chr4:116074839-116075339			Promoter	Yes
chr4:116075638-116076138	TSS	Lrrc41	Lrrc41 chr4:116075638-116076138			Promoter	Yes
chr10:75559133-75559633	TSS	Lrrc75b	Lrrc75b chr10:75559133-75559633			Promoter	Yes
chr10:75559759-75560259	TSS	Lrrc75b	Lrrc75b chr10:75559759-75560259			Promoter	Yes
chr10:75560364-75560864	TSS	Lrrc75b	Lrrc75b chr10:75560364-75560864			PEs	No
chr9:111117769-111118269	TSS	Lrrfip2	Lrrfip2 chr9:111117769-111118269	0.302288	4.95279e-11	Promoter	Yes
chr9:111118337-111118837	TSS	Lrrfip2	Lrrfip2 chr9:111118337-111118837			Promoter	Yes
chr6:107528815-107529315	TSS	Lrrn1	Lrrn1 chr6:107528815-107529315			PEs	Yes
chr6:107529320-107529820	TSS	Lrrn1	Lrrn1 chr6:107529320-107529820	0.352531	6.39063e-15	Promoter	Yes
chr6:107529915-107530415	TSS	Lrrn1	Lrrn1 chr6:107529915-107530415			Promoter	Yes
chr18:35213816-35214316	TSS	Lrrtm2	Lrrtm2 chr18:35213816-35214316			Promoter	No
chr18:35214773-35215273	TSS	Lrrtm2	Lrrtm2 chr18:35214773-35215273			Promoter	Yes
chr14:29017813-29018313	TSS	Lrtm1	Lrtm1 chr14:29017813-29018313	0.453716	2.90438e-25	PEs	Yes
chr10:80854364-80854864	TSS	Lsm7	Lsm7 chr10:80854364-80854864			Promoter	No
chr10:80855009-80855509	TSS	Lsm7	Lsm7 chr10:80855009-80855509			Promoter	No
chr10:80855555-80856055	TSS	Lsm7	Lsm7 chr10:80855555-80856055			Promoter	No
chr10:80856155-80856655	TSS	Lsm7	Lsm7 chr10:80856155-80856655			PEs	No
chr7:30973005-30973505	TSS	Lsr	Lsr chr7:30973005-30973505			Other	Yes
chr7:30973601-30974101	TSS	Lsr	Lsr chr7:30973601-30974101	0.444409	3.73228e-24	Promoter	Yes
chr7:30974210-30974710	TSS	Lsr	Lsr chr7:30974210-30974710			Promoter	No
chr16:87431835-87432335	TSS	Ltn1	Ltn1 chr16:87431835-87432335			Promoter	No
chr16:87432361-87432861	TSS	Ltn1	Ltn1 chr16:87432361-87432861			Promoter	Yes
chr11:94320856-94321356	TSS	Luc7l3	Luc7l3 chr11:94320856-94321356			Promoter	No
chr11:94321713-94322213	TSS	Luc7l3	Luc7l3 chr11:94321713-94322213			Promoter	Yes
chr11:94322342-94322842	TSS	Luc7l3	Luc7l3 chr11:94322342-94322842			Promoter	No
chr3:67462545-67463045	TSS	Lxn	Lxn chr3:67462545-67463045			PEs	No
chr3:67463371-67463871	TSS	Lxn	Lxn chr3:67463371-67463871			PEs	Yes
chr3:67463972-67464472	TSS	Lxn	Lxn chr3:67463972-67464472			PEs	No
chr15:75565867-75566367	TSS	Ly6h	Ly6h chr15:75565867-75566367			Promoter	Yes
chr15:75566774-75567274	TSS	Ly6h	Ly6h chr15:75566774-75567274			Promoter	Yes
chr4:32799540-32800040	TSS	Lyrm2	Lyrm2 chr4:32799540-32800040			Promoter	No
chr4:32800096-32800596	TSS	Lyrm2	Lyrm2 chr4:32800096-32800596	-0.268856	7.67998e-09	Promoter	Yes
chr4:32800841-32801341	TSS	Lyrm2	Lyrm2 chr4:32800841-32801341			Promoter	No
chr4:148129703-148130203	TSS	Mad2l2	Mad2l2 chr4:148129703-148130203			PEs	Yes
chr4:148130487-148130987	TSS	Mad2l2	Mad2l2 chr4:148130487-148130987			Promoter	Yes
chr4:148130990-148131490	TSS	Mad2l2	Mad2l2 chr4:148130990-148131490	0.363314	7.42397e-16	Promoter	Yes
chr4:148131768-148132268	TSS	Mad2l2	Mad2l2 chr4:148131768-148132268			Promoter	No
chrX:150812903-150813403	TSS	Maged2	Maged2 chrX:150812903-150813403			Promoter	No
chrX:150813457-150813957	TSS	Maged2	Maged2 chrX:150813457-150813957			Promoter	Yes
chrX:150814056-150814556	TSS	Maged2	Maged2 chrX:150814056-150814556			PEs	Yes
chrX:104857003-104857503	TSS	Magee2	Magee2 chrX:104857003-104857503			Promoter	Yes
chr19:5801877-5802377	TSS	Malat1	Malat1 chr19:5801877-5802377			Promoter	No
chr19:5802419-5802919	TSS	Malat1	Malat1 chr19:5802419-5802919	0.266434	1.07723e-08	Promoter	No
chr19:5803382-5803882	TSS	Malat1	Malat1 chr19:5803382-5803882			Promoter	No
chr13:111807872-111808372	TSS	Map3k1	Map3k1 chr13:111807872-111808372	0.495381	1.12629e-30	Promoter	Yes
chr13:111808913-111809413	TSS	Map3k1	Map3k1 chr13:111808913-111809413	0.57574	1.59238e-43	Promoter	No
chr13:111809490-111809990	TSS	Map3k1	Map3k1 chr13:111809490-111809990	0.662981	2.85179e-62	Promoter	Yes
chr16:21890664-21891164	TSS	Map3k13	Map3k13 chr16:21890664-21891164			Other	No
chr17:12317708-12318208	TSS	Map3k4	Map3k4 chr17:12317708-12318208			Promoter	No
chr17:12318286-12318786	TSS	Map3k4	Map3k4 chr17:12318286-12318786			Promoter	No
chr17:12318825-12319325	TSS	Map3k4	Map3k4 chr17:12318825-12319325			Promoter	No
chr18:4351751-4352251	TSS	Map3k8	Map3k8 chr18:4351751-4352251			Other	No
chr18:4352724-4353224	TSS	Map3k8	Map3k8 chr18:4352724-4353224			Promoter	Yes
chr18:4353251-4353751	TSS	Map3k8	Map3k8 chr18:4353251-4353751			Promoter	Yes
chr9:109931348-109931848	TSS	Map4	Map4 chr9:109931348-109931848			Promoter	No
chr9:109931920-109932420	TSS	Map4	Map4 chr9:109931920-109932420			Promoter	No
chr7:99267136-99267636	TSS	Map6	Map6 chr7:99267136-99267636	0.450624	6.84657e-25	Promoter	No
chr7:99267980-99268480	TSS	Map6	Map6 chr7:99267980-99268480			Promoter	No
chr10:20147984-20148484	TSS	Map7	Map7 chr10:20147984-20148484			Promoter	No
chr10:20148700-20149200	TSS	Map7	Map7 chr10:20148700-20149200			Promoter	No
chr10:20149320-20149820	TSS	Map7	Map7 chr10:20149320-20149820			Promoter	No
chr3:82357710-82358210	TSS	Map9	Map9 chr3:82357710-82358210	0.560511	8.2247e-41	Promoter	Yes
chr3:82358290-82358790	TSS	Map9	Map9 chr3:82358290-82358790	0.309872	1.42898e-11	Promoter	Yes
chr14:47298050-47298550	TSS	Mapk1ip1l	Mapk1ip1l chr14:47298050-47298550			Promoter	No
chr14:47298637-47299137	TSS	Mapk1ip1l	Mapk1ip1l chr14:47298637-47299137			Promoter	Yes
chr17:24936118-24936618	TSS	Mapk8ip3	Mapk8ip3 chr17:24936118-24936618			Promoter	No
chr17:24936784-24937284	TSS	Mapk8ip3	Mapk8ip3 chr17:24936784-24937284	0.395281	7.53489e-19	Promoter	Yes
chr11:104230421-104230921	TSS	Mapt	Mapt chr11:104230421-104230921			Promoter	Yes
chr11:104231062-104231562	TSS	Mapt	Mapt chr11:104231062-104231562			Promoter	Yes
chr11:104232201-104232701	TSS	Mapt	Mapt chr11:104232201-104232701	0.309118	1.62009e-11	Promoter	Yes
chr15:26308069-26308569	TSS	March11	March11 chr15:26308069-26308569			PEs	No
chr15:26308583-26309083	TSS	March11	March11 chr15:26308583-26309083			Promoter	Yes
chr15:26309566-26310066	TSS	March11	March11 chr15:26309566-26310066	0.327975	6.3071e-13	Promoter	No
chr18:56924757-56925257	TSS	March3	March3 chr18:56924757-56925257			Promoter	No
chr18:56925387-56925887	TSS	March3	March3 chr18:56925387-56925887			Promoter	No
chr18:56925960-56926460	TSS	March3	March3 chr18:56925960-56926460			Promoter	No
chr12:111573316-111573816	TSS	Mark3	Mark3 chr12:111573316-111573816			Other	No
chr12:111574140-111574640	TSS	Mark3	Mark3 chr12:111574140-111574640	-0.313372	7.95513e-12	Promoter	Yes
chr12:111574955-111575455	TSS	Mark3	Mark3 chr12:111574955-111575455	-0.256997	3.89572e-08	Promoter	No
chr10:81252421-81252921	TSS	Matk	Matk chr10:81252421-81252921			Other	No
chr10:81253033-81253533	TSS	Matk	Matk chr10:81253033-81253533			PEs	Yes
chr15:34306436-34306936	TSS	Matn2	Matn2 chr15:34306436-34306936			Promoter	Yes
chr15:34307100-34307600	TSS	Matn2	Matn2 chr15:34307100-34307600			PEs	Yes
chr18:70568085-70568585	TSS	Mbd2	Mbd2 chr18:70568085-70568585	-0.339439	7.79194e-14	Promoter	Yes
chr18:70568864-70569364	TSS	Mbd2	Mbd2 chr18:70568864-70569364			Promoter	No
chr10:127288016-127288516	TSS	Mbd6	Mbd6 chr10:127288016-127288516			Promoter	No
chr10:127288664-127289164	TSS	Mbd6	Mbd6 chr10:127288664-127289164			Promoter	No
chr10:127289224-127289724	TSS	Mbd6	Mbd6 chr10:127289224-127289724	0.48687	1.65611e-29	Promoter	Yes
chr10:127289726-127290226	TSS	Mbd6	Mbd6 chr10:127289726-127290226			Promoter	Yes
chr18:44811929-44812429	TSS	Mcc	Mcc chr18:44811929-44812429			PEs	No
chr18:44812733-44813233	TSS	Mcc	Mcc chr18:44812733-44813233	0.304986	3.19656e-11	PEs	No
chrX:60178010-60178510	TSS	Mcf2	Mcf2 chrX:60178010-60178510			PEs	No
chrX:60178769-60179269	TSS	Mcf2	Mcf2 chrX:60178769-60179269			PEs	No
chrX:38600348-38600848	TSS	Mcts1	Mcts1 chrX:38600348-38600848			Promoter	No
chrX:38600983-38601483	TSS	Mcts1	Mcts1 chrX:38600983-38601483	0.387362	4.47228e-18	Promoter	No
chr11:70452032-70452532	TSS	Med11	Med11 chr11:70452032-70452532	-0.468358	4.43255e-27	Promoter	No
chr7:28392008-28392508	TSS	Med29	Med29 chr7:28392008-28392508			Promoter	Yes
chr7:28392533-28393033	TSS	Med29	Med29 chr7:28392533-28393033	-0.375824	5.49276e-17	Promoter	Yes
chr7:28393151-28393651	TSS	Med29	Med29 chr7:28393151-28393651	-0.265584	1.21214e-08	Promoter	Yes
chr4:70533719-70534219	TSS	Megf9	Megf9 chr4:70533719-70534219			Promoter	No
chr4:70534320-70534820	TSS	Megf9	Megf9 chr4:70534320-70534820			Promoter	No
chr4:70534882-70535382	TSS	Megf9	Megf9 chr4:70534882-70535382	-0.25788	3.46246e-08	Promoter	No
chr7:79792439-79792939	TSS	Mesp1	Mesp1 chr7:79792439-79792939	0.525181	4.8944e-35	Other	Yes
chr7:79793040-79793540	TSS	Mesp1	Mesp1 chr7:79793040-79793540			PEs	Yes
chr10:80386189-80386689	TSS	Mex3d	Mex3d chr10:80386189-80386689			Promoter	Yes
chr10:80386963-80387463	TSS	Mex3d	Mex3d chr10:80386963-80387463			Promoter	No
chr10:80387719-80388219	TSS	Mex3d	Mex3d chr10:80387719-80388219			Promoter	No
chr10:80388446-80388946	TSS	Mex3d	Mex3d chr10:80388446-80388946			Other	No
chr11:50224118-50224618	TSS	Mgat4b	Mgat4b chr11:50224118-50224618			Promoter	No
chr11:50224769-50225269	TSS	Mgat4b	Mgat4b chr11:50224769-50225269			Promoter	Yes
chr11:50225663-50226163	TSS	Mgat4b	Mgat4b chr11:50225663-50226163			Promoter	Yes
chr11:50226317-50226817	TSS	Mgat4b	Mgat4b chr11:50226317-50226817			Promoter	Yes
chr1:167392586-167393086	TSS	Mgst3	Mgst3 chr1:167392586-167393086			PEs	Yes
chr1:167393129-167393629	TSS	Mgst3	Mgst3 chr1:167393129-167393629	0.440476	1.07198e-23	Promoter	No
chr1:167393970-167394470	TSS	Mgst3	Mgst3 chr1:167393970-167394470			Promoter	No
chr2:136890638-136891138	TSS	Mkks	Mkks chr2:136890638-136891138			Promoter	No
chr2:136891147-136891647	TSS	Mkks	Mkks chr2:136891147-136891647			Promoter	No
chr2:136891889-136892389	TSS	Mkks	Mkks chr2:136891889-136892389			Promoter	Yes
chr17:56934740-56935240	TSS	Mllt1	Mllt1 chr17:56934740-56935240			Promoter	No
chr17:56935376-56935876	TSS	Mllt1	Mllt1 chr17:56935376-56935876	-0.386507	5.40296e-18	Promoter	No
chr5:114443422-114443922	TSS	Mmab	Mmab chr5:114443422-114443922			Promoter	Yes
chr5:114443996-114444496	TSS	Mmab	Mmab chr5:114443996-114444496	-0.53566	1.11697e-36	Promoter	Yes
chr5:114444876-114445376	TSS	Mmab	Mmab chr5:114444876-114445376			Other	No
chr8:95351378-95351878	TSS	Mmp15	Mmp15 chr8:95351378-95351878			Promoter	No
chr8:95352001-95352501	TSS	Mmp15	Mmp15 chr8:95352001-95352501			Promoter	Yes
chr8:95353001-95353501	TSS	Mmp15	Mmp15 chr8:95353001-95353501			Promoter	Yes
chr12:102742922-102743422	TSS	Moap1	Moap1 chr12:102742922-102743422			Promoter	Yes
chr12:102743474-102743974	TSS	Moap1	Moap1 chr12:102743474-102743974			Promoter	Yes
chr12:102744009-102744509	TSS	Moap1	Moap1 chr12:102744009-102744509			Promoter	Yes
chr17:8282990-8283490	TSS	Mpc1	Mpc1 chr17:8282990-8283490			Promoter	No
chr17:8283527-8284027	TSS	Mpc1	Mpc1 chr17:8283527-8284027			Promoter	No
chr17:8284264-8284764	TSS	Mpc1	Mpc1 chr17:8284264-8284764			Promoter	No
chr1:165460386-165460886	TSS	Mpc2	Mpc2 chr1:165460386-165460886			Promoter	No
chr1:165460895-165461395	TSS	Mpc2	Mpc2 chr1:165460895-165461395			Promoter	Yes
chr1:165461520-165462020	TSS	Mpc2	Mpc2 chr1:165461520-165462020			Promoter	No
chr14:56667953-56668453	TSS	Mphosph8	Mphosph8 chr14:56667953-56668453			Promoter	Yes
chr14:56668946-56669446	TSS	Mphosph8	Mphosph8 chr14:56668946-56669446			Promoter	No
chr11:59661474-59661974	TSS	Mprip	Mprip chr11:59661474-59661974			Promoter	No
chr11:59662123-59662623	TSS	Mprip	Mprip chr11:59662123-59662623			Promoter	No
chr11:59662709-59663209	TSS	Mprip	Mprip chr11:59662709-59663209			Promoter	No
chr9:99435783-99436283	TSS	Mras	Mras chr9:99435783-99436283			Promoter	Yes
chr9:99436494-99436994	TSS	Mras	Mras chr9:99436494-99436994			Promoter	Yes
chr9:99437275-99437775	TSS	Mras	Mras chr9:99437275-99437775			Promoter	Yes
chr1:72211302-72211802	TSS	Mreg	Mreg chr1:72211302-72211802			Promoter	No
chr1:72212095-72212595	TSS	Mreg	Mreg chr1:72212095-72212595	0.436426	3.13235e-23	Promoter	Yes
chr1:72212716-72213216	TSS	Mreg	Mreg chr1:72212716-72213216			PEs	No
chr2:180580791-180581291	TSS	Mrgbp	Mrgbp chr2:180580791-180581291			PEs	No
chr17:45685198-45685698	TSS	Mrpl14	Mrpl14 chr17:45685198-45685698			Promoter	Yes
chr17:45685989-45686489	TSS	Mrpl14	Mrpl14 chr17:45685989-45686489	0.414843	7.43227e-21	Promoter	No
chr17:45686910-45687410	TSS	Mrpl14	Mrpl14 chr17:45686910-45687410			Promoter	Yes
chr4:155802640-155803140	TSS	Mrpl20	Mrpl20 chr4:155802640-155803140			Other	No
chr4:155803292-155803792	TSS	Mrpl20	Mrpl20 chr4:155803292-155803792			Promoter	No
chr7:142532882-142533382	TSS	Mrpl23	Mrpl23 chr7:142532882-142533382			Promoter	Yes
chr7:142533504-142534004	TSS	Mrpl23	Mrpl23 chr7:142533504-142534004	0.305291	3.04142e-11	Promoter	Yes
chr11:94653504-94654004	TSS	Mrpl27	Mrpl27 chr11:94653504-94654004			Promoter	Yes
chr9:105052970-105053470	TSS	Mrpl3	Mrpl3 chr9:105052970-105053470			Promoter	Yes
chr9:105053538-105054038	TSS	Mrpl3	Mrpl3 chr9:105053538-105054038			Promoter	No
chr13:14611811-14612311	TSS	Mrpl32	Mrpl32 chr13:14611811-14612311			Promoter	No
chr13:14613020-14613520	TSS	Mrpl32	Mrpl32 chr13:14613020-14613520			Promoter	Yes
chr13:14613528-14614028	TSS	Mrpl32	Mrpl32 chr13:14613528-14614028			Promoter	Yes
chr6:125191452-125191952	TSS	Mrpl51	Mrpl51 chr6:125191452-125191952	-0.283297	9.47745e-10	Promoter	Yes
chr6:125192186-125192686	TSS	Mrpl51	Mrpl51 chr6:125192186-125192686	-0.307635	2.07044e-11	Promoter	Yes
chr6:125192746-125193246	TSS	Mrpl51	Mrpl51 chr6:125192746-125193246			Promoter	Yes
chr6:83107531-83108031	TSS	Mrpl53	Mrpl53 chr6:83107531-83108031			Promoter	Yes
chr6:83108783-83109283	TSS	Mrpl53	Mrpl53 chr6:83108783-83109283			Promoter	Yes
chr11:59202249-59202749	TSS	Mrpl55	Mrpl55 chr11:59202249-59202749			Promoter	No
chr3:94443071-94443571	TSS	Mrpl9	Mrpl9 chr3:94443071-94443571			Promoter	No
chr3:94443576-94444076	TSS	Mrpl9	Mrpl9 chr3:94443576-94444076			Promoter	Yes
chr17:35915898-35916398	TSS	Mrps18b	Mrps18b chr17:35915898-35916398			Promoter	No
chr17:35916544-35917044	TSS	Mrps18b	Mrps18b chr17:35916544-35917044			Promoter	Yes
chr17:35917101-35917601	TSS	Mrps18b	Mrps18b chr17:35917101-35917601			Promoter	Yes
chr3:95871288-95871788	TSS	Mrps21	Mrps21 chr3:95871288-95871788			Promoter	No
chr3:95872052-95872552	TSS	Mrps21	Mrps21 chr3:95872052-95872552			Promoter	No
chr11:88193626-88194126	TSS	Mrps23	Mrps23 chr11:88193626-88194126			PEs	No
chr8:22411110-22411610	TSS	Mrps31	Mrps31 chr8:22411110-22411610			Promoter	No
chr8:22411785-22412285	TSS	Mrps31	Mrps31 chr8:22411785-22412285			Promoter	No
chr17:24894362-24894862	TSS	Mrps34	Mrps34 chr17:24894362-24894862			Promoter	No
chr17:24894866-24895366	TSS	Mrps34	Mrps34 chr17:24894866-24895366			Promoter	Yes
chr17:24895452-24895952	TSS	Mrps34	Mrps34 chr17:24895452-24895952			Promoter	Yes
chr13:100743924-100744424	TSS	Mrps36	Mrps36 chr13:100743924-100744424	-0.313615	7.63505e-12	Promoter	Yes
chr13:100744680-100745180	TSS	Mrps36	Mrps36 chr13:100744680-100745180			Promoter	No
chr2:127586927-127587427	TSS	Mrps5	Mrps5 chr2:127586927-127587427			Promoter	No
chr2:127587445-127587945	TSS	Mrps5	Mrps5 chr2:127587445-127587945			Promoter	No
chr2:127588124-127588624	TSS	Mrps5	Mrps5 chr2:127588124-127588624			Promoter	No
chr9:37487932-37488432	TSS	Msantd2	Msantd2 chr9:37487932-37488432			AEs	No
chr9:37488440-37488940	TSS	Msantd2	Msantd2 chr9:37488440-37488940			Promoter	No
chr9:37488994-37489494	TSS	Msantd2	Msantd2 chr9:37488994-37489494			Promoter	No
chr9:37489804-37490304	TSS	Msantd2	Msantd2 chr9:37489804-37490304			Promoter	Yes
chr14:64455148-64455648	TSS	Msra	Msra chr14:64455148-64455648			AEs	No
chr14:64455865-64456365	TSS	Msra	Msra chr14:64455865-64456365	0.436731	2.8901e-23	PEs	No
chr14:64456374-64456874	TSS	Msra	Msra chr14:64456374-64456874			AEs	Yes
chr8:94151577-94152077	TSS	Mt3	Mt3 chr8:94151577-94152077			Other	No
chr8:94152485-94152985	TSS	Mt3	Mt3 chr8:94152485-94152985			PEs	Yes
chr8:94153471-94153971	TSS	Mt3	Mt3 chr8:94153471-94153971			PEs	No
chr15:34081525-34082025	TSS	Mtdh	Mtdh chr15:34081525-34082025			Promoter	No
chr15:34082111-34082611	TSS	Mtdh	Mtdh chr15:34082111-34082611			Promoter	Yes
chr15:34082646-34083146	TSS	Mtdh	Mtdh chr15:34082646-34083146			Promoter	Yes
chr15:34083535-34084035	TSS	Mtdh	Mtdh chr15:34083535-34084035			Promoter	No
chr1:93305645-93306145	TSS	Mterf4	Mterf4 chr1:93305645-93306145			Promoter	No
chr7:140137676-140138176	TSS	Mtg1	Mtg1 chr7:140137676-140138176			Promoter	Yes
chr5:146962748-146963248	TSS	Mtif3	Mtif3 chr5:146962748-146963248			Promoter	No
chr5:146963566-146964066	TSS	Mtif3	Mtif3 chr5:146963566-146964066			Promoter	No
chr6:35539072-35539572	TSS	Mtpn	Mtpn chr6:35539072-35539572	-0.425101	5.81676e-22	Promoter	Yes
chr6:35539597-35540097	TSS	Mtpn	Mtpn chr6:35539597-35540097	-0.528574	1.45942e-35	Promoter	Yes
chr10:5823378-5823878	TSS	Mtrf1l	Mtrf1l chr10:5823378-5823878	-0.40264	1.37436e-19	Promoter	No
chr10:5824087-5824587	TSS	Mtrf1l	Mtrf1l chr10:5824087-5824587	-0.307137	2.24768e-11	Promoter	No
chr10:5824791-5825291	TSS	Mtrf1l	Mtrf1l chr10:5824791-5825291			Promoter	No
chr15:59081308-59081808	TSS	Mtss1	Mtss1 chr15:59081308-59081808			Promoter	Yes
chr15:59082004-59082504	TSS	Mtss1	Mtss1 chr15:59082004-59082504			Promoter	Yes
chr15:59082742-59083242	TSS	Mtss1	Mtss1 chr15:59082742-59083242			PEs	No
chr6:54680825-54681325	TSS	Mturn	Mturn chr6:54680825-54681325			Promoter	No
chr6:54681393-54681893	TSS	Mturn	Mturn chr6:54681393-54681893			Promoter	No
chr6:54681919-54682419	TSS	Mturn	Mturn chr6:54681919-54682419	0.263738	1.56409e-08	Promoter	No
chr6:54682472-54682972	TSS	Mturn	Mturn chr6:54682472-54682972			Promoter	Yes
chr2:33886843-33887343	TSS	Mvb12b	Mvb12b chr2:33886843-33887343			Promoter	No
chr2:33887429-33887929	TSS	Mvb12b	Mvb12b chr2:33887429-33887929			Promoter	Yes
chr11:116827222-116827722	TSS	Mxra7	Mxra7 chr11:116827222-116827722			Promoter	Yes
chr11:116827770-116828270	TSS	Mxra7	Mxra7 chr11:116827770-116828270			Promoter	Yes
chr4:155839462-155839962	TSS	Mxra8	Mxra8 chr4:155839462-155839962			PEs	Yes
chr4:155840219-155840719	TSS	Mxra8	Mxra8 chr4:155840219-155840719			PEs	Yes
chr1:9699499-9699999	TSS	Mybl1	Mybl1 chr1:9699499-9699999			Promoter	Yes
chr1:9700079-9700579	TSS	Mybl1	Mybl1 chr1:9700079-9700579			Promoter	No
chr1:9700816-9701316	TSS	Mybl1	Mybl1 chr1:9700816-9701316			Promoter	No
chr17:70989608-70990108	TSS	Myl12b	Myl12b chr17:70989608-70990108			Promoter	No
chr17:70990281-70990781	TSS	Myl12b	Myl12b chr17:70990281-70990781			Promoter	Yes
chr17:70990942-70991442	TSS	Myl12b	Myl12b chr17:70990942-70991442	0.319915	2.60173e-12	Promoter	No
chr10:128492819-128493319	TSS	Myl6	Myl6 chr10:128492819-128493319			Promoter	Yes
chr10:128493620-128494120	TSS	Myl6	Myl6 chr10:128493620-128494120	-0.288196	4.52546e-10	Promoter	Yes
chr10:128494125-128494625	TSS	Myl6	Myl6 chr10:128494125-128494625			Promoter	Yes
chr10:128494673-128495173	TSS	Myl6	Myl6 chr10:128494673-128495173			Promoter	Yes
chr10:128497982-128498482	TSS	Myl6b	Myl6b chr10:128497982-128498482			Other	Yes
chr10:128498600-128499100	TSS	Myl6b	Myl6b chr10:128498600-128499100	-0.385097	7.37432e-18	Promoter	Yes
chr10:128499330-128499830	TSS	Myl6b	Myl6b chr10:128499330-128499830			Promoter	No
chr13:45388858-45389358	TSS	Mylip	Mylip chr13:45388858-45389358			Other	Yes
chr13:45389372-45389872	TSS	Mylip	Mylip chr13:45389372-45389872			Promoter	Yes
chr13:45389940-45390440	TSS	Mylip	Mylip chr13:45389940-45390440			Promoter	No
chr13:45390540-45391040	TSS	Mylip	Mylip chr13:45390540-45391040			Promoter	Yes
chr3:30601032-30601532	TSS	Mynn	Mynn chr3:30601032-30601532			Promoter	Yes
chr3:30601827-30602327	TSS	Mynn	Mynn chr3:30601827-30602327	0.36257	8.63492e-16	Promoter	Yes
chr3:30602338-30602838	TSS	Mynn	Mynn chr3:30602338-30602838	0.392621	1.37764e-18	Promoter	Yes
chr15:25621156-25621656	TSS	Myo10	Myo10 chr15:25621156-25621656			PEs	No
chr15:25621788-25622288	TSS	Myo10	Myo10 chr15:25621788-25622288			PEs	No
chr15:25622347-25622847	TSS	Myo10	Myo10 chr15:25622347-25622847			Promoter	No
chr15:25622978-25623478	TSS	Myo10	Myo10 chr15:25622978-25623478			Promoter	No
chrX:73921186-73921686	TSS	Naa10	Naa10 chrX:73921186-73921686			Promoter	Yes
chrX:73921704-73922204	TSS	Naa10	Naa10 chrX:73921704-73922204			Promoter	Yes
chrX:73922217-73922717	TSS	Naa10	Naa10 chrX:73922217-73922717			Promoter	Yes
chr11:69394802-69395302	TSS	Naa38	Naa38 chr11:69394802-69395302			Promoter	Yes
chr11:69395510-69396010	TSS	Naa38	Naa38 chr11:69395510-69396010			Promoter	Yes
chr11:69396098-69396598	TSS	Naa38	Naa38 chr11:69396098-69396598			Promoter	Yes
chr11:69396644-69397144	TSS	Naa38	Naa38 chr11:69396644-69397144			PEs	No
chr1:52499589-52500089	TSS	Nab1	Nab1 chr1:52499589-52500089			Promoter	Yes
chr1:52500385-52500885	TSS	Nab1	Nab1 chr1:52500385-52500885			Promoter	No
chr15:9070147-9070647	TSS	Nadk2	Nadk2 chr15:9070147-9070647			Promoter	Yes
chr15:9070942-9071442	TSS	Nadk2	Nadk2 chr15:9070942-9071442	0.567504	4.87048e-42	Promoter	Yes
chr15:9071776-9072276	TSS	Nadk2	Nadk2 chr15:9071776-9072276			Promoter	No
chr8:66859944-66860444	TSS	Naf1	Naf1 chr8:66859944-66860444			Promoter	Yes
chr8:66860826-66861326	TSS	Naf1	Naf1 chr8:66860826-66861326			Promoter	Yes
chr6:83794248-83794748	TSS	Nagk	Nagk chr6:83794248-83794748			Promoter	No
chr6:83794892-83795392	TSS	Nagk	Nagk chr6:83794892-83795392			Promoter	Yes
chr6:83795428-83795928	TSS	Nagk	Nagk chr6:83795428-83795928			Promoter	No
chr4:46488999-46489499	TSS	Nans	Nans chr4:46488999-46489499	-0.380343	2.08141e-17	Promoter	Yes
chr4:46489673-46490173	TSS	Nans	Nans chr4:46489673-46490173			Promoter	Yes
chrX:122396663-122397163	TSS	Nap1l3	Nap1l3 chrX:122396663-122397163			Promoter	Yes
chrX:122397245-122397745	TSS	Nap1l3	Nap1l3 chrX:122397245-122397745			Promoter	Yes
chr15:75893837-75894337	TSS	Naprt	Naprt chr15:75893837-75894337			Other	Yes
chr15:75894374-75894874	TSS	Naprt	Naprt chr15:75894374-75894874			Other	No
chr2:103760361-103760861	TSS	Nat10	Nat10 chr2:103760361-103760861			Promoter	No
chr2:103760953-103761453	TSS	Nat10	Nat10 chr2:103760953-103761453			Promoter	No
chr2:103762051-103762551	TSS	Nat10	Nat10 chr2:103762051-103762551			Promoter	No
chr7:4920978-4921478	TSS	Nat14	Nat14 chr7:4920978-4921478			Other	No
chr7:4922341-4922841	TSS	Nat14	Nat14 chr7:4922341-4922841	0.5282	1.6694e-35	Promoter	Yes
chr7:4923088-4923588	TSS	Nat14	Nat14 chr7:4923088-4923588			Promoter	Yes
chr12:13269121-13269621	TSS	Nbas	Nbas chr12:13269121-13269621			Promoter	No
chr16:31947645-31948145	TSS	Ncbp2	Ncbp2 chr16:31947645-31948145			Promoter	Yes
chr16:31948331-31948831	TSS	Ncbp2	Ncbp2 chr16:31948331-31948831			Promoter	Yes
chr1:43444968-43445468	TSS	Nck2	Nck2 chr1:43444968-43445468			Promoter	Yes
chr1:43445511-43446011	TSS	Nck2	Nck2 chr1:43445511-43446011			Promoter	Yes
chr1:43446076-43446576	TSS	Nck2	Nck2 chr1:43446076-43446576			Promoter	No
chr1:126829891-126830391	TSS	Nckap5	Nckap5 chr1:126829891-126830391	0.314591	6.47263e-12	PEs	No
chr1:126830575-126831075	TSS	Nckap5	Nckap5 chr1:126830575-126831075	0.312308	9.51286e-12	PEs	No
chr12:4475766-4476266	TSS	Ncoa1	Ncoa1 chr12:4475766-4476266			Promoter	Yes
chr12:4476280-4476780	TSS	Ncoa1	Ncoa1 chr12:4476280-4476780	0.299816	7.36791e-11	Promoter	No
chr12:4477112-4477612	TSS	Ncoa1	Ncoa1 chr12:4477112-4477612			Promoter	No
chr14:32159113-32159613	TSS	Ncoa4	Ncoa4 chr14:32159113-32159613			Promoter	No
chr14:32159654-32160154	TSS	Ncoa4	Ncoa4 chr14:32159654-32160154	-0.283836	8.74362e-10	Promoter	Yes
chr14:32160179-32160679	TSS	Ncoa4	Ncoa4 chr14:32160179-32160679			Promoter	Yes
chr10:30801962-30802462	TSS	Ncoa7	Ncoa7 chr10:30801962-30802462			Promoter	No
chr10:30802579-30803079	TSS	Ncoa7	Ncoa7 chr10:30802579-30803079			Promoter	No
chr10:30803122-30803622	TSS	Ncoa7	Ncoa7 chr10:30803122-30803622			Promoter	Yes
chr10:30803779-30804279	TSS	Ncoa7	Ncoa7 chr10:30803779-30804279			PEs	Yes
chr18:38418878-38419378	TSS	Ndfip1	Ndfip1 chr18:38418878-38419378	0.48042	1.20735e-28	Promoter	Yes
chr18:38419949-38420449	TSS	Ndfip1	Ndfip1 chr18:38419949-38420449			Promoter	No
chr14:51912389-51912889	TSS	Ndrg2	Ndrg2 chr14:51912389-51912889			Promoter	Yes
chr14:51913177-51913677	TSS	Ndrg2	Ndrg2 chr14:51913177-51913677	0.279058	1.77515e-09	Promoter	No
chr14:51913956-51914456	TSS	Ndrg2	Ndrg2 chr14:51913956-51914456	0.72472	6.33169e-80	Promoter	Yes
chr14:20733522-20734022	TSS	Ndst2	Ndst2 chr14:20733522-20734022			Promoter	No
chr14:20734313-20734813	TSS	Ndst2	Ndst2 chr14:20734313-20734813			Promoter	Yes
chr17:56716852-56717352	TSS	Ndufa11	Ndufa11 chr17:56716852-56717352			Promoter	No
chr17:56717498-56717998	TSS	Ndufa11	Ndufa11 chr17:56717498-56717998			Promoter	No
chr8:69901387-69901887	TSS	Ndufa13	Ndufa13 chr8:69901387-69901887			Promoter	Yes
chr8:69902231-69902731	TSS	Ndufa13	Ndufa13 chr8:69902231-69902731			Promoter	Yes
chr8:69903034-69903534	TSS	Ndufa13	Ndufa13 chr8:69903034-69903534	0.276038	2.75759e-09	Promoter	No
chr8:69903556-69904056	TSS	Ndufa13	Ndufa13 chr8:69903556-69904056			PEs	No
chr6:39592307-39592807	TSS	Ndufb2	Ndufb2 chr6:39592307-39592807	0.620931	1.73572e-52	Promoter	Yes
chr6:39592819-39593319	TSS	Ndufb2	Ndufb2 chr6:39592819-39593319	0.295364	1.49239e-10	Promoter	No
chr16:37653679-37654179	TSS	Ndufb4	Ndufb4 chr16:37653679-37654179	0.270261	6.29858e-09	Promoter	Yes
chr16:37654213-37654713	TSS	Ndufb4	Ndufb4 chr16:37654213-37654713			Promoter	Yes
chr4:40279140-40279640	TSS	Ndufb6	Ndufb6 chr4:40279140-40279640	0.465425	1.04222e-26	Promoter	Yes
chr7:97399807-97400307	TSS	Ndufc2	Ndufc2 chr7:97399807-97400307			Promoter	Yes
chr7:97400405-97400905	TSS	Ndufc2	Ndufc2 chr7:97400405-97400905			Promoter	No
chr2:90904448-90904948	TSS	Ndufs3	Ndufs3 chr2:90904448-90904948			Promoter	Yes
chr4:123717461-123717961	TSS	Ndufs5	Ndufs5 chr4:123717461-123717961			Promoter	Yes
chr4:123718024-123718524	TSS	Ndufs5	Ndufs5 chr4:123718024-123718524			Promoter	Yes
chr19:3912589-3913089	TSS	Ndufs8	Ndufs8 chr19:3912589-3913089	0.422099	1.23831e-21	Promoter	Yes
chr19:3913104-3913604	TSS	Ndufs8	Ndufs8 chr19:3913104-3913604			Promoter	No
chr18:64887002-64887502	TSS	Nedd4l	Nedd4l chr18:64887002-64887502			Promoter	No
chr18:64887725-64888225	TSS	Nedd4l	Nedd4l chr18:64887725-64888225			Promoter	No
chr18:64888686-64889186	TSS	Nedd4l	Nedd4l chr18:64888686-64889186			Promoter	No
chr14:68083583-68084083	TSS	Nefl	Nefl chr14:68083583-68084083	0.296158	1.31715e-10	Promoter	Yes
chr14:68084177-68084677	TSS	Nefl	Nefl chr14:68084177-68084677	0.27627	2.6663e-09	Promoter	Yes
chr3:156560644-156561144	TSS	Negr1	Negr1 chr3:156560644-156561144			Promoter	Yes
chr3:156561586-156562086	TSS	Negr1	Negr1 chr3:156561586-156562086			Promoter	Yes
chr3:156562223-156562723	TSS	Negr1	Negr1 chr3:156562223-156562723	0.309245	1.58616e-11	Promoter	Yes
chr15:95527375-95527875	TSS	Nell2	Nell2 chr15:95527375-95527875			Promoter	Yes
chr15:95527885-95528385	TSS	Nell2	Nell2 chr15:95527885-95528385			Promoter	Yes
chr15:95528449-95528949	TSS	Nell2	Nell2 chr15:95528449-95528949			Promoter	Yes
chr9:59035401-59035901	TSS	Neo1	Neo1 chr9:59035401-59035901			Promoter	No
chr9:59035907-59036407	TSS	Neo1	Neo1 chr9:59035907-59036407	-0.324357	1.19816e-12	Promoter	No
chr9:59036413-59036913	TSS	Neo1	Neo1 chr9:59036413-59036913	-0.31186	1.02551e-11	Promoter	No
chr9:59036939-59037439	TSS	Neo1	Neo1 chr9:59036939-59037439			Promoter	No
chr10:130278890-130279390	TSS	Neurod4	Neurod4 chr10:130278890-130279390			Promoter	No
chr10:130280043-130280543	TSS	Neurod4	Neurod4 chr10:130280043-130280543	0.710928	1.40208e-75	Promoter	Yes
chr11:96829277-96829777	TSS	Nfe2l1	Nfe2l1 chr11:96829277-96829777			Promoter	Yes
chr11:96829808-96830308	TSS	Nfe2l1	Nfe2l1 chr11:96829808-96830308	-0.258559	3.16142e-08	Promoter	Yes
chr11:96830816-96831316	TSS	Nfe2l1	Nfe2l1 chr11:96830816-96831316			Other	No
chr1:172056618-172057118	TSS	Nhlh1	Nhlh1 chr1:172056618-172057118			PEs	Yes
chr1:172057443-172057943	TSS	Nhlh1	Nhlh1 chr1:172057443-172057943	0.491946	3.36117e-30	PEs	Yes
chr1:172058294-172058794	TSS	Nhlh1	Nhlh1 chr1:172058294-172058794			AEs	No
chr10:18406790-18407290	TSS	Nhsl1	Nhsl1 chr10:18406790-18407290			PEs	No
chr10:18407367-18407867	TSS	Nhsl1	Nhsl1 chr10:18407367-18407867	0.416046	5.54056e-21	Promoter	Yes
chr10:18407983-18408483	TSS	Nhsl1	Nhsl1 chr10:18407983-18408483			Promoter	Yes
chr10:18408592-18409092	TSS	Nhsl1	Nhsl1 chr10:18408592-18409092			Promoter	No
chr13:49186592-49187092	TSS	Ninj1	Ninj1 chr13:49186592-49187092	0.31082	1.22029e-11	AEs	No
chr13:49187261-49187761	TSS	Ninj1	Ninj1 chr13:49187261-49187761			Promoter	No
chr13:49187825-49188325	TSS	Ninj1	Ninj1 chr13:49187825-49188325			Promoter	No
chrX:37126508-37127008	TSS	Nkap	Nkap chrX:37126508-37127008			Promoter	Yes
chrX:37127048-37127548	TSS	Nkap	Nkap chrX:37127048-37127548			Promoter	Yes
chr14:18269758-18270258	TSS	Nkiras1	Nkiras1 chr14:18269758-18270258			Promoter	Yes
chr14:18270312-18270812	TSS	Nkiras1	Nkiras1 chr14:18270312-18270812	0.3358	1.52786e-13	Promoter	Yes
chr14:18270842-18271342	TSS	Nkiras1	Nkiras1 chr14:18270842-18271342	0.450726	6.65823e-25	Promoter	Yes
chr14:18271650-18272150	TSS	Nkiras1	Nkiras1 chr14:18271650-18272150			Promoter	No
chr11:69836654-69837154	TSS	Nlgn2	Nlgn2 chr11:69836654-69837154	0.37291	1.01835e-16	Promoter	Yes
chr11:69837538-69838038	TSS	Nlgn2	Nlgn2 chr11:69837538-69838038			Promoter	Yes
chr11:69838131-69838631	TSS	Nlgn2	Nlgn2 chr11:69838131-69838631	0.279486	1.66724e-09	Promoter	Yes
chr11:69838693-69839193	TSS	Nlgn2	Nlgn2 chr11:69838693-69839193			Promoter	No
chr7:80904844-80905344	TSS	Nmb	Nmb chr7:80904844-80905344			PEs	Yes
chr11:93955213-93955713	TSS	Nme2	Nme2 chr11:93955213-93955713			Promoter	Yes
chr11:93955715-93956215	TSS	Nme2	Nme2 chr11:93955715-93956215			Promoter	No
chr17:24895452-24895952	TSS	Nme3	Nme3 chr17:24895452-24895952			Promoter	Yes
chr17:24896209-24896709	TSS	Nme3	Nme3 chr17:24896209-24896709			Promoter	No
chr17:24896832-24897332	TSS	Nme3	Nme3 chr17:24896832-24897332			Promoter	Yes
chr2:157559303-157559803	TSS	Nnat	Nnat chr2:157559303-157559803			PEs	Yes
chr2:157559883-157560383	TSS	Nnat	Nnat chr2:157559883-157560383	0.449044	1.05801e-24	Promoter	Yes
chr19:38819037-38819537	TSS	Noc3l	Noc3l chr19:38819037-38819537			Promoter	Yes
chr18:23041113-23041613	TSS	Nol4	Nol4 chr18:23041113-23041613	0.267088	9.83568e-09	Promoter	Yes
chr18:23041646-23042146	TSS	Nol4	Nol4 chr18:23041646-23042146	0.278773	1.85095e-09	Promoter	Yes
chr13:49652704-49653204	TSS	Nol8	Nol8 chr13:49652704-49653204			Promoter	Yes
chr13:49653514-49654014	TSS	Nol8	Nol8 chr13:49653514-49654014			Promoter	Yes
chr7:30456865-30457365	TSS	Nphs1	Nphs1 chr7:30456865-30457365			PEs	No
chr7:30457542-30458042	TSS	Nphs1	Nphs1 chr7:30457542-30458042			PEs	Yes
chr7:30458426-30458926	TSS	Nphs1	Nphs1 chr7:30458426-30458926			PEs	Yes
chr7:30459276-30459776	TSS	Nphs1	Nphs1 chr7:30459276-30459776			PEs	Yes
chr9:107541347-107541847	TSS	Nprl2	Nprl2 chr9:107541347-107541847			Promoter	Yes
chr9:107541905-107542405	TSS	Nprl2	Nprl2 chr9:107541905-107542405			Promoter	Yes
chr9:58581524-58582024	TSS	Nptn	Nptn chr9:58581524-58582024			Promoter	Yes
chr9:58582048-58582548	TSS	Nptn	Nptn chr9:58582048-58582548			Promoter	Yes
chr9:58582629-58583129	TSS	Nptn	Nptn chr9:58582629-58583129			Promoter	Yes
chr9:58583138-58583638	TSS	Nptn	Nptn chr9:58583138-58583638			Promoter	Yes
chr11:119547483-119547983	TSS	Nptx1	Nptx1 chr11:119547483-119547983	0.323036	1.51099e-12	Promoter	Yes
chr11:119548186-119548686	TSS	Nptx1	Nptx1 chr11:119548186-119548686	0.419264	2.50738e-21	Promoter	No
chr10:67284159-67284659	TSS	Nrbf2	Nrbf2 chr10:67284159-67284659			Promoter	No
chr10:67285027-67285527	TSS	Nrbf2	Nrbf2 chr10:67285027-67285527	0.258439	3.21298e-08	Promoter	Yes
chr10:67285583-67286083	TSS	Nrbf2	Nrbf2 chr10:67285583-67286083			Promoter	No
chr15:76090400-76090900	TSS	Nrbp2	Nrbp2 chr15:76090400-76090900			Promoter	Yes
chr15:76090978-76091478	TSS	Nrbp2	Nrbp2 chr15:76090978-76091478			Promoter	No
chr15:76091518-76092018	TSS	Nrbp2	Nrbp2 chr15:76091518-76092018	0.28156	1.22694e-09	Promoter	No
chr12:100158810-100159310	TSS	Nrde2	Nrde2 chr12:100158810-100159310			Promoter	No
chr12:100159436-100159936	TSS	Nrde2	Nrde2 chr12:100159436-100159936			Promoter	Yes
chr18:36195824-36196324	TSS	Nrg2	Nrg2 chr18:36195824-36196324	-0.374074	7.96407e-17	Promoter	Yes
chr18:36196491-36196991	TSS	Nrg2	Nrg2 chr18:36196491-36196991			Promoter	No
chr18:36197186-36197686	TSS	Nrg2	Nrg2 chr18:36197186-36197686	-0.331034	3.64189e-13	Promoter	Yes
chr8:105892424-105892924	TSS	Nrn1l	Nrn1l chr8:105892424-105892924	0.453375	3.19301e-25	Other	Yes
chr8:105893315-105893815	TSS	Nrn1l	Nrn1l chr8:105893315-105893815			PEs	Yes
chr8:105893830-105894330	TSS	Nrn1l	Nrn1l chr8:105893830-105894330			PEs	Yes
chr13:97137704-97138204	TSS	Nsa2	Nsa2 chr13:97137704-97138204			Promoter	Yes
chr11:32000143-32000643	TSS	Nsg2	Nsg2 chr11:32000143-32000643	0.34165	5.14903e-14	Promoter	Yes
chr11:32000894-32001394	TSS	Nsg2	Nsg2 chr11:32000894-32001394			Promoter	Yes
chr2:29247252-29247752	TSS	Ntng2	Ntng2 chr2:29247252-29247752			PEs	No
chr2:29247771-29248271	TSS	Ntng2	Ntng2 chr2:29247771-29248271			Other	Yes
chr8:125733866-125734366	TSS	Ntpcr	Ntpcr chr8:125733866-125734366			Other	No
chr8:125734571-125735071	TSS	Ntpcr	Ntpcr chr8:125734571-125735071			Other	No
chr7:116504093-116504593	TSS	Nucb2	Nucb2 chr7:116504093-116504593			Promoter	Yes
chr7:116504615-116505115	TSS	Nucb2	Nucb2 chr7:116504615-116505115			Promoter	Yes
chr17:59012646-59013146	TSS	Nudt12	Nudt12 chr17:59012646-59013146			PEs	Yes
chr4:41464283-41464783	TSS	Nudt2	Nudt2 chr4:41464283-41464783			Promoter	No
chr4:41464803-41465303	TSS	Nudt2	Nudt2 chr4:41464803-41465303	-0.524248	6.80699e-35	Promoter	Yes
chr4:41465306-41465806	TSS	Nudt2	Nudt2 chr4:41465306-41465806			Promoter	No
chr17:27622007-27622507	TSS	Nudt3	Nudt3 chr17:27622007-27622507			Promoter	No
chr17:27622616-27623116	TSS	Nudt3	Nudt3 chr17:27622616-27623116			Promoter	No
chr17:27623540-27624040	TSS	Nudt3	Nudt3 chr17:27623540-27624040	0.450319	7.4483e-25	Promoter	No
chr13:46726429-46726929	TSS	Nup153	Nup153 chr13:46726429-46726929			Promoter	Yes
chr13:46727340-46727840	TSS	Nup153	Nup153 chr13:46727340-46727840			Promoter	No
chr13:46727878-46728378	TSS	Nup153	Nup153 chr13:46727878-46728378			Promoter	No
chr13:46728388-46728888	TSS	Nup153	Nup153 chr13:46728388-46728888			Promoter	No
chr8:105859216-105859716	TSS	Nutf2	Nutf2 chr8:105859216-105859716	-0.417443	3.93202e-21	PEs	Yes
chr8:105860117-105860617	TSS	Nutf2	Nutf2 chr8:105860117-105860617	-0.332877	2.60795e-13	Promoter	Yes
chr8:105860666-105861166	TSS	Nutf2	Nutf2 chr8:105860666-105861166			Promoter	Yes
chr1:81076231-81076731	TSS	Nyap2	Nyap2 chr1:81076231-81076731	0.293423	2.02225e-10	AEs	Yes
chr1:81077009-81077509	TSS	Nyap2	Nyap2 chr1:81077009-81077509	0.394322	9.37174e-19	Promoter	Yes
chr1:81077558-81078058	TSS	Nyap2	Nyap2 chr1:81077558-81078058			Promoter	Yes
chr1:75505047-75505547	TSS	Obsl1	Obsl1 chr1:75505047-75505547			Promoter	No
chr1:75505674-75506174	TSS	Obsl1	Obsl1 chr1:75505674-75506174			Promoter	Yes
chr1:75506176-75506676	TSS	Obsl1	Obsl1 chr1:75506176-75506676			Promoter	Yes
chr1:75506811-75507311	TSS	Obsl1	Obsl1 chr1:75506811-75507311			PEs	Yes
chr12:17544141-17544641	TSS	Odc1	Odc1 chr12:17544141-17544641	-0.252753	6.82246e-08	Promoter	No
chr12:17544674-17545174	TSS	Odc1	Odc1 chr12:17544674-17545174	-0.43524	4.27291e-23	Promoter	Yes
chr12:17545376-17545876	TSS	Odc1	Odc1 chr12:17545376-17545876			Promoter	No
chr9:20726749-20727249	TSS	Olfm2	Olfm2 chr9:20726749-20727249			PEs	No
chr9:20727626-20728126	TSS	Olfm2	Olfm2 chr9:20727626-20728126			Promoter	Yes
chr9:74861032-74861532	TSS	Onecut1	Onecut1 chr9:74861032-74861532			PEs	No
chr9:74861656-74862156	TSS	Onecut1	Onecut1 chr9:74861656-74862156	0.398653	3.47164e-19	Promoter	Yes
chr9:74862167-74862667	TSS	Onecut1	Onecut1 chr9:74862167-74862667			Promoter	Yes
chr9:74862895-74863395	TSS	Onecut1	Onecut1 chr9:74862895-74863395			Promoter	Yes
chrX:74127049-74127549	TSS	Opn1mw	Opn1mw chrX:74127049-74127549			Other	Yes
chr18:12941582-12942082	TSS	Osbpl1a	Osbpl1a chr18:12941582-12942082			Promoter	Yes
chr6:50455322-50455822	TSS	Osbpl3	Osbpl3 chr6:50455322-50455822			Promoter	No
chr6:50456048-50456548	TSS	Osbpl3	Osbpl3 chr6:50456048-50456548			Promoter	No
chr6:50456639-50457139	TSS	Osbpl3	Osbpl3 chr6:50456639-50457139			PEs	No
chr10:111163783-111164283	TSS	Osbpl8	Osbpl8 chr10:111163783-111164283			AEs	Yes
chr10:111164335-111164835	TSS	Osbpl8	Osbpl8 chr10:111164335-111164835			Promoter	Yes
chr10:111165207-111165707	TSS	Osbpl8	Osbpl8 chr10:111165207-111165707			Promoter	Yes
chr2:163424755-163425255	TSS	Oser1	Oser1 chr2:163424755-163425255			PEs	No
chrX:7841029-7841529	TSS	Otud5	Otud5 chrX:7841029-7841529			Promoter	Yes
chrX:7841700-7842200	TSS	Otud5	Otud5 chrX:7841700-7842200	-0.260626	2.39167e-08	Promoter	No
chrX:7842480-7842980	TSS	Otud5	Otud5 chrX:7842480-7842980			Promoter	No
chr11:120457853-120458353	TSS	Oxld1	Oxld1 chr11:120457853-120458353			Promoter	Yes
chr14:54893672-54894172	TSS	Pabpn1	Pabpn1 chr14:54893672-54894172			Promoter	No
chr14:54894279-54894779	TSS	Pabpn1	Pabpn1 chr14:54894279-54894779			Promoter	No
chr14:54894816-54895316	TSS	Pabpn1	Pabpn1 chr14:54894816-54895316			Promoter	No
chr17:27655298-27655798	TSS	Pacsin1	Pacsin1 chr17:27655298-27655798	0.47241	1.34373e-27	Promoter	Yes
chr17:27656005-27656505	TSS	Pacsin1	Pacsin1 chr17:27656005-27656505			Promoter	Yes
chr7:25297036-25297536	TSS	Pafah1b3	Pafah1b3 chr7:25297036-25297536			Promoter	Yes
chr7:25297726-25298226	TSS	Pafah1b3	Pafah1b3 chr7:25297726-25298226	-0.400997	2.01655e-19	Promoter	No
chr13:119427336-119427836	TSS	Paip1	Paip1 chr13:119427336-119427836			PEs	Yes
chr13:119428131-119428631	TSS	Paip1	Paip1 chr13:119428131-119428631			Promoter	Yes
chr13:119428703-119429203	TSS	Paip1	Paip1 chr13:119428703-119429203			Promoter	Yes
chr13:119429344-119429844	TSS	Paip1	Paip1 chr13:119429344-119429844			Promoter	Yes
chr16:32078162-32078662	TSS	Pak2	Pak2 chr16:32078162-32078662			Promoter	No
chr16:32079029-32079529	TSS	Pak2	Pak2 chr16:32079029-32079529			Promoter	No
chr16:32079608-32080108	TSS	Pak2	Pak2 chr16:32079608-32080108			Other	No
chr11:35769191-35769691	TSS	Pank3	Pank3 chr11:35769191-35769691			Promoter	Yes
chr11:35769787-35770287	TSS	Pank3	Pank3 chr11:35769787-35770287			Promoter	Yes
chr11:35770385-35770885	TSS	Pank3	Pank3 chr11:35770385-35770885			Promoter	No
chr7:140115449-140115949	TSS	Paox	Paox chr7:140115449-140115949	0.250988	8.58542e-08	Promoter	Yes
chr7:140116179-140116679	TSS	Paox	Paox chr7:140116179-140116679			Promoter	Yes
chr5:97110126-97110626	TSS	Paqr3	Paqr3 chr5:97110126-97110626			PEs	Yes
chr5:97110954-97111454	TSS	Paqr3	Paqr3 chr5:97110954-97111454			Promoter	Yes
chr5:97111459-97111959	TSS	Paqr3	Paqr3 chr5:97111459-97111959			Promoter	No
chr8:127063074-127063574	TSS	Pard3	Pard3 chr8:127063074-127063574			Promoter	No
chr8:127063581-127064081	TSS	Pard3	Pard3 chr8:127063581-127064081	0.295802	1.39333e-10	Promoter	No
chr8:127064256-127064756	TSS	Pard3	Pard3 chr8:127064256-127064756			Promoter	No
chr8:127064803-127065303	TSS	Pard3	Pard3 chr8:127064803-127065303			Promoter	No
chr4:150909527-150910027	TSS	Park7	Park7 chr4:150909527-150910027			Promoter	Yes
chr4:150910176-150910676	TSS	Park7	Park7 chr4:150910176-150910676			Other	No
chr5:91517390-91517890	TSS	Parm1	Parm1 chr5:91517390-91517890			Promoter	No
chr5:91518240-91518740	TSS	Parm1	Parm1 chr5:91518240-91518740			Promoter	No
chr10:61088995-61089495	TSS	Pcbd1	Pcbd1 chr10:61088995-61089495			AEs	No
chr10:61089721-61090221	TSS	Pcbd1	Pcbd1 chr10:61089721-61090221			AEs	Yes
chr10:61090261-61090761	TSS	Pcbd1	Pcbd1 chr10:61090261-61090761			Other	No
chr14:122534949-122535449	TSS	Pcca	Pcca chr14:122534949-122535449			Promoter	No
chr5:108460917-108461417	TSS	Pcgf3	Pcgf3 chr5:108460917-108461417			Promoter	No
chr5:108461513-108462013	TSS	Pcgf3	Pcgf3 chr5:108461513-108462013			Promoter	No
chr8:13104118-13104618	TSS	Pcid2	Pcid2 chr8:13104118-13104618			Promoter	No
chr8:13104621-13105121	TSS	Pcid2	Pcid2 chr8:13104621-13105121	-0.371236	1.44726e-16	Promoter	No
chr8:13105397-13105897	TSS	Pcid2	Pcid2 chr8:13105397-13105897	-0.285081	7.25585e-10	Promoter	No
chr8:13106254-13106754	TSS	Pcid2	Pcid2 chr8:13106254-13106754	-0.492558	2.76836e-30	Promoter	No
chr5:14514783-14515283	TSS	Pclo	Pclo chr5:14514783-14515283	0.385674	6.4944e-18	Promoter	Yes
chr1:7087944-7088444	TSS	Pcmtd1	Pcmtd1 chr1:7087944-7088444			Promoter	No
chr1:7088482-7088982	TSS	Pcmtd1	Pcmtd1 chr1:7088482-7088982			Promoter	Yes
chr1:7089243-7089743	TSS	Pcmtd1	Pcmtd1 chr1:7089243-7089743			Promoter	Yes
chr8:3625409-3625909	TSS	Pcp2	Pcp2 chr8:3625409-3625909	0.533473	2.48498e-36	PEs	Yes
chr16:96467367-96467867	TSS	Pcp4	Pcp4 chr16:96467367-96467867			PEs	Yes
chr16:96468033-96468533	TSS	Pcp4	Pcp4 chr16:96468033-96468533			PEs	Yes
chrX:7919448-7919948	TSS	Pcsk1n	Pcsk1n chrX:7919448-7919948			PEs	Yes
chrX:7920044-7920544	TSS	Pcsk1n	Pcsk1n chrX:7920044-7920544			Promoter	Yes
chr6:86396147-86396647	TSS	Pcyox1	Pcyox1 chr6:86396147-86396647			Promoter	No
chr6:86396862-86397362	TSS	Pcyox1	Pcyox1 chr6:86396862-86397362			Promoter	Yes
chr19:47089579-47090079	TSS	Pdcd11	Pdcd11 chr19:47089579-47090079			Promoter	Yes
chr19:47090450-47090950	TSS	Pdcd11	Pdcd11 chr19:47090450-47090950			Promoter	Yes
chr7:35646595-35647095	TSS	Pdcd5	Pdcd5 chr7:35646595-35647095			Promoter	No
chr7:35647358-35647858	TSS	Pdcd5	Pdcd5 chr7:35647358-35647858			Promoter	Yes
chr19:38131913-38132413	TSS	Pde6c	Pde6c chr19:38131913-38132413	0.686334	1.99153e-68	PEs	Yes
chr19:38132496-38132996	TSS	Pde6c	Pde6c chr19:38132496-38132996	0.699877	2.8381e-72	PEs	Yes
chr19:38133317-38133817	TSS	Pde6c	Pde6c chr19:38133317-38133817			PEs	Yes
chr6:136954151-136954651	TSS	Pde6h	Pde6h chr6:136954151-136954651			Other	Yes
chr17:31384780-31385280	TSS	Pde9a	Pde9a chr17:31384780-31385280			PEs	No
chr17:31385838-31386338	TSS	Pde9a	Pde9a chr17:31385838-31386338	0.362577	8.62229e-16	Promoter	No
chr17:31386339-31386839	TSS	Pde9a	Pde9a chr17:31386339-31386839			Promoter	No
chr17:31386896-31387396	TSS	Pde9a	Pde9a chr17:31386896-31387396			Promoter	No
chr8:107047834-107048334	TSS	Pdf	Pdf chr8:107047834-107048334			Promoter	Yes
chr8:107048373-107048873	TSS	Pdf	Pdf chr8:107048373-107048873			Promoter	Yes
chr8:107048880-107049380	TSS	Pdf	Pdf chr8:107048880-107049380			Promoter	No
chrX:160137102-160137602	TSS	Pdha1	Pdha1 chrX:160137102-160137602			PEs	No
chrX:160137685-160138185	TSS	Pdha1	Pdha1 chrX:160137685-160138185			Promoter	No
chrX:160138194-160138694	TSS	Pdha1	Pdha1 chrX:160138194-160138694			Promoter	Yes
chr3:142394688-142395188	TSS	Pdlim5	Pdlim5 chr3:142394688-142395188	-0.26222	1.92599e-08	Promoter	Yes
chr3:142395357-142395857	TSS	Pdlim5	Pdlim5 chr3:142395357-142395857	-0.558824	1.61022e-40	Promoter	Yes
chr6:101376489-101376989	TSS	Pdzrn3	Pdzrn3 chr6:101376489-101376989	0.414474	8.13249e-21	Promoter	No
chr6:101377017-101377517	TSS	Pdzrn3	Pdzrn3 chr6:101377017-101377517	0.493423	2.10409e-30	Promoter	Yes
chr6:101377794-101378294	TSS	Pdzrn3	Pdzrn3 chr6:101377794-101378294	0.720888	1.0854e-78	Promoter	Yes
chr6:4745982-4746482	TSS	Peg10	Peg10 chr6:4745982-4746482			Promoter	Yes
chr6:4746650-4747150	TSS	Peg10	Peg10 chr6:4746650-4747150			Promoter	Yes
chr6:4747208-4747708	TSS	Peg10	Peg10 chr6:4747208-4747708			Promoter	Yes
chr6:4747951-4748451	TSS	Peg10	Peg10 chr6:4747951-4748451			Promoter	Yes
chr10:18844941-18845441	TSS	Perp	Perp chr10:18844941-18845441			PEs	Yes
chr8:3621290-3621790	TSS	Pet100	Pet100 chr8:3621290-3621790			Promoter	Yes
chr8:3622055-3622555	TSS	Pet100	Pet100 chr8:3622055-3622555			PEs	Yes
chr5:3595879-3596379	TSS	Pex1	Pex1 chr5:3595879-3596379			Promoter	Yes
chr5:3596394-3596894	TSS	Pex1	Pex1 chr5:3596394-3596894			Promoter	Yes
chr8:3467421-3467921	TSS	Pex11g	Pex11g chr8:3467421-3467921			Promoter	No
chr8:3468111-3468611	TSS	Pex11g	Pex11g chr8:3468111-3468611			PEs	No
chr10:13552808-13553308	TSS	Pex3	Pex3 chr10:13552808-13553308			Promoter	Yes
chr10:13553360-13553860	TSS	Pex3	Pex3 chr10:13553360-13553860			Promoter	Yes
chr2:11552773-11553273	TSS	Pfkfb3	Pfkfb3 chr2:11552773-11553273			PEs	No
chr2:11553437-11553937	TSS	Pfkfb3	Pfkfb3 chr2:11553437-11553937			PEs	Yes
chr15:98092636-98093136	TSS	Pfkm	Pfkm chr15:98092636-98093136			Promoter	No
chr15:98093140-98093640	TSS	Pfkm	Pfkm chr15:98093140-98093640			Promoter	No
chr19:41911507-41912007	TSS	Pgam1	Pgam1 chr19:41911507-41912007			Promoter	Yes
chr19:41912192-41912692	TSS	Pgam1	Pgam1 chr19:41912192-41912692			Promoter	Yes
chr19:41912694-41913194	TSS	Pgam1	Pgam1 chr19:41912694-41913194			Promoter	No
chr4:149166462-149166962	TSS	Pgd	Pgd chr4:149166462-149166962			Promoter	Yes
chr4:149167017-149167517	TSS	Pgd	Pgd chr4:149167017-149167517			Promoter	No
chrX:36597920-36598420	TSS	Pgrmc1	Pgrmc1 chrX:36597920-36598420			Promoter	Yes
chrX:36598470-36598970	TSS	Pgrmc1	Pgrmc1 chrX:36598470-36598970			Promoter	Yes
chrX:36598980-36599480	TSS	Pgrmc1	Pgrmc1 chrX:36598980-36599480			Promoter	Yes
chr11:95666629-95667129	TSS	Phb	Phb chr11:95666629-95667129	-0.307992	1.95204e-11	Promoter	Yes
chr11:95667178-95667678	TSS	Phb	Phb chr11:95667178-95667678			Promoter	No
chr4:128654507-128655007	TSS	Phc2	Phc2 chr4:128654507-128655007			Promoter	Yes
chr4:128655444-128655944	TSS	Phc2	Phc2 chr4:128655444-128655944			Promoter	No
chr15:66577245-66577745	TSS	Phf20l1	Phf20l1 chr15:66577245-66577745			Promoter	Yes
chr15:66577784-66578284	TSS	Phf20l1	Phf20l1 chr15:66577784-66578284			Promoter	No
chr15:66578374-66578874	TSS	Phf20l1	Phf20l1 chr15:66578374-66578874			Promoter	No
chr1:30872713-30873213	TSS	Phf3	Phf3 chr1:30872713-30873213			Promoter	Yes
chr1:30873545-30874045	TSS	Phf3	Phf3 chr1:30873545-30874045			Promoter	Yes
chr7:127572973-127573473	TSS	Phkg2	Phkg2 chr7:127572973-127573473	-0.378508	3.09111e-17	Promoter	Yes
chr7:127573549-127574049	TSS	Phkg2	Phkg2 chr7:127573549-127574049			Promoter	No
chr2:4917573-4918073	TSS	Phyh	Phyh chr2:4917573-4918073			PEs	No
chr2:4918715-4919215	TSS	Phyh	Phyh chr2:4918715-4919215			Promoter	Yes
[truncated: 5,773 more rows]
